# Supplementary material for: Particle Swarm Optimization of Support Vector Machine Inversion Model for Overhead Upright Piers Damage-Inducing Factor
Source: Hindawi journal article supplement (doi:10.1155/2023/8871629), 2023-12-13
Supplement: f1 [file 8871629.f1.zip]

Archive with 3 entries (3 files):
- data_cz.txt
- data_dz.txt
- data_hz.txt
