# Supplementary material for: Particle Swarm Optimization of Support Vector Machine Inversion Model for Overhead Upright Piers Damage-Inducing Factor
Source: Hindawi journal article supplement (doi:10.1155/2023/8871629), 2023-12-13
Supplement: f1 [file 8871629.f1.zip › data_cz.txt]

	0	1	2	3	4	5	6	7	8	9	10	11	12	13	14	15	16	17	18	19	20	21	22	23	24	25	26	27	28	29	30	31	32	33	34	35	36	37	38	39	40	41	42	43	44	45	46	47	48
0	-609784.173764243	-795872.8836572075	-869901.03643075	-881646.5317480252	-794899.1286578696	-775526.9982333609	-988020.6575725101	-1030768.7394240594	-1025111.5303501496	-904217.9097679161	-753369.5711038351	-968672.2767768963	-1008543.3215575814	-1003813.0190337623	-883721.6811246872	-720334.1999897176	-931957.0083654413	-969532.7122596451	-965612.5530103443	-849452.5024531505	-701167.329832149	-850364.7339372062	-906769.9435108217	-899768.0613346365	-792502.2200704105	-824054.4501975172	-1033444.0444399768	-1074962.5678294692	-1068145.3952850075	-944467.2001453098	-800804.0311765816	-1012728.8201199509	-1051392.4838572268	-1045587.3356541881	-922704.9893697363	-765427.255330965	-973673.0039853385	-1010112.176558904	-1005122.5127914094	-886099.6097592479	-792550.4891167241	-904856.5841795097	-943638.7944572181	-917889.5284547547	-790105.3115080817	-872581.8268871403	-1078867.3688074434	-1119156.4090094122	-1111179.2602617492
1	-597124.0602980312	-837882.1456374169	-945463.9745698251	-1005437.7123271162	-812176.6608271471	-673355.0307170589	-958459.9242789627	-1075835.3130012788	-1153283.7973714364	-1129601.5770921449	-605700.9295607944	-878129.0239022404	-996776.7985303418	-1079709.874067418	-1067146.490639296	-550127.3035363369	-791807.6509813376	-897617.5750169103	-967621.5385436807	-949484.1423058619	-702970.7671416176	-892839.4303278333	-979367.5823920735	-1027285.422568867	-966663.9235273245	-733887.7974794753	-1008471.6077431667	-1116806.2724990956	-1184104.443786074	-1147651.7280239717	-670055.8245052706	-932219.9627704422	-1041565.2595582444	-1114128.7550494156	-1087698.2630595593	-615241.8861597864	-848117.9972318124	-945458.3340434517	-1006012.1840360652	-974037.0314933377	-808817.473985204	-947796.7149683072	-1013271.150538031	-1049133.0703106178	-1121151.1862275018	-794420.4941506361	-1058483.2286574284	-1157777.2471794235	-1214925.0902007115
2	-602052.1253504872	-749422.4511870691	-801230.3732422586	-803226.1065751459	-713938.722559271	-763748.2850939984	-937910.0731620896	-949960.8366422842	-906239.0642248327	-746943.3046412108	-761169.2696246393	-951786.80969775	-958180.3537925237	-913199.0631422936	-751518.6040162072	-750894.7691744847	-959550.4037454203	-970027.4895798651	-932327.4310395434	-777137.7320139632	-688227.6635770226	-810383.124220719	-850721.038885688	-836691.1599325577	-720271.7782880538	-813534.4897445203	-989006.9566645523	-1003899.0840154547	-963246.4731876327	-805364.3069922816	-806948.4495243477	-998159.1367352505	-1007522.685084802	-965786.0955425291	-806131.8386342373	-791245.5727816392	-999370.6509401398	-1012280.9030723987	-977227.4355536414	-824053.5824969242	-774403.2038566187	-871343.7962305542	-900211.642031833	-870156.1507383714	-726604.8345328174	-863320.6318950423	-1040103.7610741574	-1057837.3314157822	-1020253.8862782795
3	-584114.3442344982	-769802.8408744445	-819846.6332169991	-853207.2938512121	-768259.8494648212	-694057.8540042844	-909405.5176279554	-954353.338210458	-947165.7882499837	-822868.2964685711	-664882.1823823703	-882397.7383197797	-923031.4412298177	-917983.5389761124	-795188.1095644811	-647170.3062397465	-860216.252327498	-896691.1863830503	-894044.895084807	-776241.3292945808	-683797.511255218	-830964.798166339	-865139.0233607435	-879168.104570982	-774632.3818928315	-752596.561630759	-964606.832720356	-1008204.5474072635	-999934.372099938	-873120.8456938779	-722573.8886369453	-936492.1469000207	-975871.5611708129	-969766.9855797412	-844431.7993582864	-700979.448892911	-910455.4162984113	-945814.8337367569	-942064.8940027255	-821605.1032540728	-783480.6821378686	-892126.7535018607	-910431.3519826744	-905128.8508597864	-781004.9182335876	-811135.2067572337	-1019808.085338164	-1062055.7643533382	-1052702.9481752156
4	-539368.2166062705	-758092.5910941955	-808560.9993616423	-807188.406570487	-717150.1305442235	-754909.8130521873	-919291.8148777416	-925997.140057	-884073.3305550669	-731006.078716106	-746802.174776677	-919138.0033351906	-919982.4014020462	-877858.5914599486	-722944.4084650393	-739908.6944569276	-923924.1104312816	-928193.6251509921	-892610.6521200823	-743340.9644782471	-712392.525240189	-832102.4035025958	-861405.9576429776	-842023.7812098629	-725159.0447522757	-807736.2093265341	-973905.3701388333	-983484.5861273095	-944057.5996833368	-791505.004902612	-796337.9138432521	-970029.3765121852	-973952.39898328	-934503.5347194053	-780510.5947458993	-783607.7989557962	-968224.5767918916	-975254.1651938797	-941956.5426996856	-793566.9257969838	-885416.8338694434	-906112.2159109962	-914250.8525357972	-876859.0932909372	-733167.958512572	-860562.5573497803	-1028518.862899925	-1040972.0393337291	-1004041.8688116067
5	-581600.0112618397	-788402.7945418234	-864803.6086709105	-889890.7757793218	-807118.3364661116	-683097.8292884075	-919390.9202876714	-985405.936159445	-993755.9706556188	-895068.207098558	-642362.21080983	-874113.8364293561	-938219.4351361584	-949363.8091970428	-852947.5974820242	-614030.6689647251	-831154.4403477268	-889321.2873550011	-897627.8873508866	-802911.641721776	-683748.6856630184	-846431.3619151288	-905109.3214884455	-908635.5801688789	-807612.4133013187	-742512.6407563504	-973217.8603318837	-1035536.1475544802	-1040486.8131485905	-936629.2863386596	-702628.2577278474	-928759.6716888263	-989135.4177977694	-996913.7506231393	-894971.8073669113	-672064.0735405483	-884162.7403023086	-938991.4379894845	-944314.425249016	-843969.9712796427	-785897.3577353316	-904459.9292884341	-945414.9671176065	-927380.3314045413	-808106.4854481517	-801927.3897242934	-1027044.737845453	-1085666.3682956204	-1087217.6556722051
6	-624704.275857161	-850098.1295304996	-944889.1736353857	-826679.6144871762	-899261.1401892349	-756862.24903574	-1019344.5549538909	-1121459.8550082543	-1168856.1093544886	-1072747.4976720798	-710582.2719935286	-967051.684183623	-1069457.8670971529	-1122734.8261024125	-1028273.215937912	-657999.6656800949	-894565.509712754	-987124.0864713925	-1031391.8200126041	-939637.5160902136	-722021.9699997492	-903049.7939556839	-994258.7396518412	-1005303.0896490723	-915887.21703661	-808117.8923781337	-1062535.2482428292	-1157589.0657013946	-1197975.9024542894	-1096197.115785664	-763408.7572560392	-1011799.4758959033	-1106916.475317049	-1153056.721086071	-1052480.654864486	-710648.2780515747	-939961.9302403003	-1025749.5615650273	-1063554.768057576	-965462.5616100397	-819339.6728917444	-956001.4671878372	-1043628.2519177038	-1183926.5023224808	-932513.2938264231	-859373.4644711203	-1105725.8615329533	-1193718.2763945349	-1227095.6779977141
7	-631892.6529161322	-695572.6526462261	-844051.4728606335	-844018.8205020796	-750953.3522311661	-802116.9488555738	-995786.0933713248	-1005637.0637706341	-960704.1060224338	-808409.7136510093	-792359.3034616688	-996521.1503252361	-999589.8059430601	-953826.8494781998	-800100.9577116419	-772349.3716756476	-982577.3949610348	-989033.8964463805	-949714.8361057749	-801919.1887443212	-734895.4644458311	-864490.615069125	-903140.2032617598	-875628.4426591806	-756109.2033023147	-849373.961994865	-1042028.577129734	-1054413.7096019483	-1012111.1017097232	-860159.8204077758	-836626.9948153585	-1039241.1901446943	-1045039.6355653115	-1002144.0377156317	-849117.1091717066	-812011.1042495486	-1020206.5275237872	-1029064.1596898269	-992285.9029664283	-845139.0028288815	-837898.2702491403	-1033408.5774694197	-962228.8769269497	-907238.002331351	-761265.0550892621	-896630.9011060295	-1088271.00991627	-1103190.3554332624	-1063518.097359339
8	-613618.2448766431	-834110.114546859	-915958.4117295035	-948377.4921219448	-866533.4434356054	-761824.0318070602	-1013449.6075778902	-1092525.7752590454	-1112393.3059454227	-1029913.3093786549	-718901.9386124074	-961411.278823733	-1039580.3679374743	-1063320.163857076	-983708.5050431816	-667198.3255794537	-887355.7745639079	-957176.3946961578	-975588.0684215836	-896394.1991820235	-710857.5573715538	-882758.7130159213	-945716.8911917426	-954711.4472097763	-856842.4580458457	-811843.2209445278	-1056182.3301330444	-1129960.1702045752	-1144886.3597229086	-1055614.041125954	-770658.745521328	-1006015.7362438431	-1078811.036458539	-1097602.5635802022	-1010602.7343775351	-719196.6532748186	-933208.427657785	-998274.058762411	-1012362.9175144248	-925653.6314745877	-808096.8659615809	-931407.3114849835	-975475.3002928345	-961045.3554685223	-847151.4647949387	-861862.3475819954	-1098914.9901368187	-1167394.5808210194	-1177379.4135517746
9	-646562.8318941086	-691771.7167103583	-852293.7700241655	-850113.9956815515	-755707.6731881662	-837490.4751448728	-1028158.5254305969	-1032468.8605131658	-982085.4491572401	-825333.6578382127	-831903.2242070718	-1034307.5748489611	-1031325.813067432	-979807.0677107053	-821199.7511799508	-807953.1561330513	-1017818.5171921297	-1019091.2014331613	-974858.2918388665	-822532.2644905795	-748603.6636797518	-875273.1436634274	-911863.0833460721	-880900.7878999403	-759302.1144670934	-880833.4208561243	-1070797.063650647	-1078222.355712993	-1031033.0958115514	-875092.6371181557	-871876.4737326669	-1073004.9967102874	-1073358.7981139938	-1025292.8857416131	-867906.4641989254	-843513.2416539906	-1051546.9018709904	-1055768.656927078	-1014609.440057335	-863456.4452541964	-850644.4888783259	-1058774.5705904951	-971432.3407983838	-911687.5176356634	-762896.5565694041	-924176.2908065657	-1113435.5526315074	-1123975.8509128203	-1079980.7424225267
10	-583898.5733089168	-757553.5537125766	-817978.3690800427	-825343.8536468599	-738548.1816131234	-715505.7618460311	-907999.9557831435	-940815.5189652131	-917198.3114963954	-778401.7022074473	-697866.5817718233	-899266.5449876335	-927481.5153666773	-904118.8206257777	-764876.6945533871	-685626.0551155274	-893017.2520897858	-921502.2632376282	-902029.1748811805	-767763.3668171851	-678575.6167434622	-818999.0591438215	-865199.3097314852	-855526.5051544348	-744840.3934419266	-771197.0956604681	-962647.2360264286	-995957.7916952323	-973066.221130717	-833364.8820290724	-751346.7036844275	-951226.3529483216	-980009.9983318257	-957500.7680363384	-817621.1990831412	-734440.2432096639	-939819.3998573119	-968662.7701791294	-949786.3163882574	-814838.6142382012	-773252.6638338877	-880444.5627603809	-912420.1869719703	-885709.0932414124	-751132.6060178113	-826888.3669749051	-1017294.4537456144	-1051100.0644252514	-1028934.1307650385
11	-590654.6781177167	-825834.3052119007	-929377.1416176413	-984643.6933069059	-802616.7428853819	-662381.0601591442	-940127.9272012117	-1050228.451708556	-1118810.6948271187	-1084940.513145451	-597830.9883532292	-864434.6128301473	-975327.4499365205	-1048953.3190727648	-1025200.3108107895	-548617.7864018283	-787308.3847985128	-886440.2704392022	-948554.8500926301	-920171.7850523585	-696867.5420105684	-882534.8184068332	-965544.4845639901	-1008060.0732795094	-942799.1632971185	-724228.1343606251	-992220.2327426958	-1094073.8835314603	-1153435.444741391	-1107824.1486384533	-663059.4727291703	-920110.3296341955	-1022524.5187218589	-1086742.5690912642	-1050264.5805678205	-613921.4757691871	-844367.3961781048	-935773.5526034314	-989307.5165704917	-948219.0194145087	-803080.4059034202	-939235.331556965	-1001711.785484236	-1031476.3907521128	-1082981.583708855	-786075.1392524072	-1044312.4757393794	-1137919.3289737622	-1188060.1946556638
12	-568898.3940846578	-787483.7433850401	-872578.9177260358	-901322.6513372881	-804712.2968944496	-630727.3048975957	-883520.8575047895	-966451.3503693781	-996325.9164335761	-911280.6198567773	-577073.6228654071	-822108.1437950041	-904180.3039218595	-936651.9036380997	-854390.6547523674	-548778.1512795803	-773367.9073580316	-847171.0322041272	-872241.4890047582	-787264.2755641231	-676776.8220588713	-848491.3188628239	-914534.6542570918	-920755.3338523207	-806914.3618857865	-696358.1262691357	-941886.8838637256	-1019348.2120407593	-1043709.5939440427	-951597.491939013	-644746.2933384199	-882595.0625269881	-959102.0027055966	-986076.3395175916	-896293.0928538685	-614418.9762353105	-832733.741574664	-901525.0622202466	-921717.7811697286	-829246.9207963587	-784655.2460845576	-909498.8943148003	-956490.3322108675	-940187.9617644076	-809116.430851458	-761988.8851406758	-1000252.8477226616	-1072245.0736863331	-1091093.2557120156
13	-543936.7335750681	-791566.9731326357	-825957.0479670916	-810535.6120974504	-715198.0791274898	-924070.6898964706	-1044168.0759295077	-1014901.021886139	-943078.0698861311	-762651.7383733218	-942393.9103347808	-1075601.6374686488	-1038252.5538633278	-964969.5137239286	-779786.2103312667	-923723.4865568432	-1082001.723630143	-1053295.277091086	-991676.7240733596	-813980.9524987588	-774162.7310949791	-867483.3811650476	-876063.088290973	-843349.0812544399	-716431.8115836859	-958490.5249927657	-1084749.2173958325	-1062135.8245429506	-996062.3082553353	-819105.7763914679	-970976.7545925498	-1109776.51011977	-1079443.429850571	-1012164.6502909913	-831224.6422078436	-946516.4969883193	-1108966.0692333924	-1086620.2047268585	-1030245.0722836762	-856773.6339260971	-1004388.7286060324	-943399.7891974597	-926169.0644274752	-876162.4878007091	-717665.5431895492	-992910.3246491323	-1125330.2963621572	-1109370.640751942	-1049046.5466245397
14	-579118.6487671159	-753749.493359734	-805622.1645358166	-805639.552667121	-715675.696455243	-758436.0736529839	-932125.6744138686	-941600.2478992256	-897548.1685513194	-740239.2291173338	-750893.5974464784	-938899.3615247684	-943375.3693590066	-898753.6603742233	-739163.1690294723	-738397.7636783007	-943487.445255031	-953133.1469734157	-915998.8197212378	-762513.294304624	-669117.9648943237	-815921.4608143242	-856426.414029621	-839774.8396969737	-722795.2680888507	-809522.2050033829	-984525.3680582404	-996923.0186990092	-955783.1493836342	-799552.2947181152	-798441.2554075901	-987053.2451617572	-994572.2736115664	-953032.7880084942	-795035.0278906637	-780452.449350839	-985112.4142289504	-997309.8058156315	-962739.8289145401	-810820.7083292124	-759117.2795807762	-878093.4301682055	-907230.6014995012	-873910.064229332	-729914.8404365717	-860608.2738287253	-1036925.0068699354	-1052245.7818314696	-1014018.1378832723
15	-658713.7692864843	-769283.050130846	-862484.6605582287	-859633.3365086194	-766767.3591813624	-919408.1190761845	-1083174.4137604488	-1094995.5260205131	-1044342.4552375152	-880230.8030038204	-924560.8775475633	-1100908.0689679158	-1109085.8242073846	-1058684.8140635393	-891856.1955316884	-885690.660637091	-1074754.9504445374	-1090368.1712955234	-1050862.690398046	-891625.2841388963	-736404.591545632	-819563.6992417243	-898533.3589474214	-883585.2898687939	-763387.0135882911	-952111.467688288	-1117498.5882532413	-1132399.1472183084	-1085483.7557127527	-923194.8725748276	-952931.5108707836	-1130387.6377375098	-1141656.6591382185	-1095128.0572022125	-930689.5670220263	-910720.2398035688	-1100037.0249018245	-1118114.2014022516	-1081803.4045296684	-924897.8575879463	-814095.4096141953	-869844.3494002487	-934582.0011335186	-907537.1828408025	-760006.6679952198	-984814.7369277755	-1151822.7003011731	-1169802.7684712429	-1126625.0393153746
16	-591703.8828253297	-827788.2245412432	-931986.1049457581	-988016.0682938998	-804167.1708287818	-664160.8192226301	-943101.0113532731	-1054381.3736826614	-1124401.5442262434	-1092183.6466060858	-599107.3357900431	-866655.5730647345	-978806.1063047199	-1053941.4186147177	-1032003.1442368871	-548862.5999620116	-788038.0760005857	-888253.0062236235	-951647.0865263196	-924925.6645364286	-697857.3633506345	-884206.0208549643	-967786.315222743	-1011178.0413354506	-946669.5512386092	-725794.7389815565	-994855.8815079768	-1097760.6234480948	-1158409.3444552417	-1114283.387344626	-664194.1413907214	-922074.2705082833	-1025612.5469701763	-1091184.062023663	-1056335.5769626738	-614135.6199887098	-844975.668834171	-937344.2309148768	-992016.6803291762	-952406.1858330795	-804010.8438759393	-940623.8171230507	-1003586.4838547173	-1034339.9518770014	-1089171.931648437	-787428.5893040312	-1046610.6891170458	-1141139.8870864317	-1192417.14468424
17	-623043.8521084269	-697865.3121311469	-839079.860318789	-840342.3151825339	-748085.6272233423	-780780.2433886501	-976259.5965655587	-989452.5833328739	-947807.2458897023	-798201.4802533044	-768507.087455506	-973729.0259518526	-980447.1897625024	-938156.0266187594	-787374.5267005232	-750873.7784237172	-961320.5533552774	-970903.8446560267	-934548.734060701	-789485.7343477109	-726626.9133507555	-857986.7784167156	-897878.7113296263	-872448.2542719104	-754183.2939499994	-830398.154992142	-1024675.9185735647	-1040052.7418691029	-1000697.678809906	-851152.601016213	-815365.1125995427	-1018875.4400568899	-1027958.0015368162	-988181.0488920277	-837783.6918909277	-793009.5542802296	-1001302.5502612295	-1012956.4641342987	-978820.7275696314	-834090.2351504806	-830209.9693858413	-1018108.2446817292	-956677.5050819644	-904554.1308749903	-760280.9613275619	-880015.9936126319	-1073092.1885645727	-1090652.900405332	-1053588.1116958517
18	-613988.4339831449	-779329.5270371863	-818385.356510277	-807330.4690682346	-712840.2069607668	-907516.7238982006	-1050135.916689293	-1030645.3547664797	-959072.724789129	-774796.7925580248	-923278.6743887515	-1089623.4226202536	-1063883.5999224938	-990363.766390597	-800950.8144430487	-896237.3480162845	-1095453.708414856	-1080754.081634797	-1019890.2217116025	-838534.7636805745	-688895.5363342443	-833943.4509096174	-865232.9677825808	-839172.1191508573	-713406.9688870847	-941326.1120554712	-1088674.5005031624	-1075415.0820317026	-1009891.5226161774	-829688.3450208141	-951154.0530980044	-1121186.9680042022	-1101868.6272062787	-1034627.9239388779	-850203.8286786429	-918927.5393346567	-1120000.5342546361	-1110805.2508585711	-1055281.7173372607	-878919.5502631501	-763802.6361239778	-888557.3781585969	-912080.5174012489	-871013.7067379347	-713973.7320829493	-975135.4376681963	-1127213.0354479526	-1120184.7956660045	-1060710.3340741468
19	-594105.5369272679	-779616.362955178	-825989.2374296169	-863181.31976885	-778072.8343806171	-719582.1534980232	-935272.9457833791	-979866.4808203364	-972976.0358096687	-848345.7513465759	-692076.5849863102	-909925.0968569148	-950019.3263926707	-945456.6429579058	-822350.9538531585	-669568.9612332067	-882696.1181280885	-918274.4931671408	-916426.1104462929	-798592.4540251135	-691839.681798039	-838627.3236373792	-869156.3838387335	-886911.7125822884	-782606.2507099896	-775161.2577004376	-987462.6199664806	-1030702.030081128	-1022736.6168687241	-895641.6480651747	-746730.7995071398	-960933.6671930965	-999782.8992833495	-994157.7930408586	-868559.2415010264	-720742.8726131081	-930259.8014611753	-964748.523148492	-961776.648715163	-841323.5169613754	-789573.8313051208	-897638.281970923	-912323.4689221788	-910642.0405775716	-787139.671736677	-830740.299402852	-1039652.2316800843	-1081537.5886450433	-1072497.1885941538
20	-634045.2073304171	-794042.9224454381	-825726.624804118	-808303.0683198848	-711209.2600029077	-993266.515412769	-1118014.3010071532	-1081863.264915785	-994461.0723831372	-794673.978869035	-1022432.9535236256	-1176318.48863927	-1133198.8036703398	-1043057.0399885474	-836490.4884629522	-987025.196254574	-1182863.277408342	-1154160.4460563858	-1079647.5815445287	-882261.5997179565	-700271.4098956229	-844309.5305504499	-870298.4148881307	-838825.4399467754	-708006.907256661	-1017138.4829562665	-1148580.104475813	-1120562.9805366779	-1041014.1513158192	-847022.3184524993	-1038993.0217503406	-1198339.4270919072	-1163584.4832606106	-1081560.6806925181	-881936.4053604362	-998577.1120762702	-1197586.915525238	-1176086.7661610409	-1108510.9434344107	-918089.3653170394	-766497.6092548979	-894576.1428817145	-914870.1435314944	-869347.7490792417	-704804.5560994408	-1041010.3879440088	-1179145.8625055992	-1159262.6790964445	-1087567.2473096275
21	-541980.1541052264	-777230.7478084496	-818506.7633801551	-809102.0892146141	-716034.0930357542	-851623.3944186433	-990686.7535850301	-976825.7534425352	-917807.8427233528	-749098.7082723517	-858626.951193023	-1008592.2476790948	-987600.4595882577	-927662.1242002032	-755442.3142004525	-845000.292371012	-1014301.107710602	-999717.4255692399	-949249.2484033591	-783727.6446409193	-747708.1250491166	-852330.6094909827	-869785.8125123074	-842781.4889971911	-720169.4632905326	-893926.2909016712	-1037277.620511648	-1028451.5021659733	-973790.0159946252	-807285.0688805354	-896183.3866832774	-1049926.37178094	-1034264.3079041983	-978904.3723123452	-809505.1072308872	-876746.8504693158	-1048690.0723296532	-1038924.9661897111	-992433.3435352956	-829703.8105400084	-953436.095985945	-927430.4711735159	-921064.7977992136	-876460.8261914973	-724304.8328673916	-936229.1464580717	-1083868.424938266	-1080077.261693752	-1029772.1892658975
22	-584969.7422105748	-771218.1422702215	-843380.3680150948	-855949.9895666887	-770058.1709978706	-706911.0274786488	-919780.2954537186	-963832.1223258596	-957184.9148232576	-835718.0127683289	-679709.2586471582	-895193.5131119407	-936199.5172358601	-930569.4697329565	-810097.9187290235	-659571.4644409716	-871528.91177346	-910212.4271335601	-905403.0552098989	-788752.1372847013	-682275.7270980468	-831428.1746097485	-886501.5439264604	-880304.1707004532	-773558.2289095573	-763580.275316138	-973354.0863626031	-1016143.3210782313	-1008349.0182566992	-884101.6335682311	-735494.0390177139	-947607.5187219144	-987375.4943534771	-980685.998421908	-857429.152615133	-711848.9182173723	-920431.8727298424	-957943.3695944819	-952085.7972277504	-832579.7023253925	-779581.7141449323	-891638.2069239698	-929622.6616116656	-904658.2893567118	-777058.2868381144	-820249.4520778311	-1026927.8147714876	-1068454.5284063993	-1059513.1217182581
23	-612471.0974423715	-832612.8208081202	-923826.625446141	-823538.8248869901	-874915.8283032629	-731142.6693852505	-987016.2800344955	-1081636.0481648846	-1121446.8127794205	-1021748.882089922	-686049.9619394037	-937024.3779437637	-1031436.9407363895	-1076495.3280586256	-978409.5850944292	-641421.1542661109	-874750.0322721277	-960325.6120290435	-997707.6396618799	-902449.2544296572	-711423.9215429284	-888126.6821241735	-974078.5551810259	-983012.4711886855	-891395.5626846496	-785380.660125916	-1033864.0565873742	-1122197.7855749703	-1155795.8426942995	-1050819.8342389471	-741584.2224444591	-985118.8853945255	-1073052.4981793554	-1111800.6623160134	-1008052.4674276547	-696004.8862859141	-922606.9224975402	-1002159.2678343053	-1033817.1972676687	-932694.2325766184	-810376.7532091247	-943640.5510556401	-1024330.4299815501	-1142486.0550003357	-907875.2970162623	-839618.5808009421	-1080711.7555089742	-1162759.522985056	-1190144.8574281263
24	-600806.9851041147	-855732.169662813	-952407.2559320455	-989084.6158016318	-921254.4548783539	-701698.3705275821	-992079.0234707496	-1104814.5043850401	-1162550.4154644886	-1107686.3981412402	-634283.8332935347	-903020.3283160147	-1017979.8979349142	-1081296.846774499	-1032059.7680222105	-572452.6149778224	-799672.4586378819	-901481.7276266825	-952425.9137704169	-899118.5803871185	-708044.1640438259	-902777.0693846542	-975974.7082494454	-989281.4362756098	-909461.0388508546	-758736.5811053133	-1037632.7110600879	-1141116.375217337	-1189772.8140847716	-1124264.6178564718	-696055.5925336704	-953868.642889736	-1059388.1303275554	-1113524.6696455984	-1052454.5789933908	-636282.224311018	-854618.7361566834	-948130.0916043731	-991103.9472241413	-925855.6594244145	-815281.346954433	-949821.9612162735	-999542.0902281937	-989478.1706304926	-897667.6386037988	-815774.7292346145	-1083186.3519298695	-1177418.2303207603	-1216995.2283823576
25	-597419.7679033056	-842383.4715204663	-941276.5093431907	-981961.374085821	-875078.4301766066	-683435.2249082832	-968496.0336364072	-1081270.0086912925	-1142906.4443778268	-1088839.1025406308	-616474.0318084598	-885553.7628113817	-999556.0784207933	-1064939.5313997003	-1014805.2539083173	-559748.4886171985	-794184.6184225688	-895063.3643861415	-946252.7926683952	-888202.3358237337	-704041.7241990848	-894424.048845507	-971748.74457319	-986848.4081098804	-866285.7691821471	-742747.4249287049	-1017093.2248060834	-1120987.2254130186	-1173490.96153325	-1108817.8009121176	-679888.5346009476	-938626.7775462465	-1043549.6516650324	-1099752.9644284248	-1038183.8125294613	-624309.3603173841	-850076.0359408617	-942838.5465120261	-985958.6660802704	-916579.3320850229	-810663.6732925697	-946464.626123474	-1002220.9244584097	-991735.3940385286	-857493.1154370557	-802059.5624491265	-1065690.3534757595	-1160704.4420876708	-1204075.4499736438
26	-583577.4275314747	-769834.7876578752	-841892.3179723282	-854508.1804805603	-768664.3679636114	-703061.0491667995	-915951.3921931459	-960076.3709860168	-953373.6155921977	-831874.5472469408	-675576.2470132337	-891070.6880118944	-932140.3736491441	-926459.8422921526	-805966.957885034	-656162.1238536676	-868138.3474668335	-906884.0210981116	-902024.7562781866	-785346.2962414365	-681215.7368362698	-830365.6618753243	-885364.3028737231	-879212.0698967833	-772495.2991818723	-760187.1255995424	-969982.4946935903	-1012843.0278400711	-1004993.8991473432	-880714.577762593	-731829.5560905898	-943953.6230579137	-983783.5606029459	-977044.4447426995	-853766.5861159805	-708842.6875453664	-917444.5623649607	-955016.2263483991	-949109.9564372479	-829576.7500883819	-778854.048241157	-890896.5360681629	-928836.22943155	-903915.8968348824	-776326.2304165402	-817313.1311920763	-1024013.5346940346	-1065609.6930343343	-1056614.1827298335
27	-588689.7925360141	-798621.371978601	-882881.0213186229	-817433.128346307	-827588.5299209622	-681143.7937870515	-924170.0975554417	-1004218.547907626	-1029283.11672112	-922607.5481014345	-638359.1390254569	-878651.2797190744	-957524.2410315983	-986605.7209253892	-881474.662000911	-609192.51985391	-836228.7342985063	-908229.3644203066	-932225.5763517546	-830155.2553150937	-690821.3100859337	-859116.1453214267	-934848.266559812	-939679.497844909	-843783.7744758772	-741179.4693492871	-978127.2457874381	-1053397.119454114	-1073797.7855983626	-962606.3764036997	-699157.3159451537	-933251.8042255106	-1007220.9098261775	-1031598.8636028352	-921684.0490128018	-667538.1254299287	-888868.7788370342	-956299.7251203208	-976007.3449014026	-868992.5846816187	-792952.8329002473	-919610.9239632807	-986815.4545653953	-1061925.804850438	-859979.018996158	-801215.0771471285	-1032084.3209906464	-1102575.6910006022	-1118312.443912183
28	-560366.4901267089	-773738.2530521787	-853193.9275663448	-876238.4330941865	-798490.1646447801	-619666.2592441037	-863390.6470916497	-935989.1141401657	-953354.3369384295	-857287.5770235322	-570435.2667906441	-807022.7572248611	-878431.9136291364	-898715.6559305803	-805699.8188165708	-549966.4059053145	-768323.0758827707	-833130.9363865138	-849075.8794120556	-756649.6132177353	-668920.4832263492	-835887.1522873729	-896412.4723454749	-898860.7453750364	-803316.6610622628	-686589.9081114719	-923940.5529147172	-992103.1944115823	-1005227.372691507	-903302.2099944908	-638935.9460942519	-869200.4683196505	-936117.8851610092	-952177.4348702093	-852836.1951837803	-615693.8771903949	-828519.4740403913	-889317.5087774933	-901526.8494030185	-802692.812857759	-777474.4778827991	-898036.0484291663	-939630.9515514227	-921482.985895903	-808143.1636665467	-753513.4944990585	-984490.4024245858	-1048217.2685164162	-1057100.414590949
29	-545441.7677400378	-802594.6411840388	-831687.933430688	-811638.3022504392	-714555.0030277342	-979798.3802532594	-1085306.8175737257	-1044189.165164395	-962516.3578896358	-773076.9593547491	-1006828.8782710286	-1127146.3983953355	-1077215.0052159512	-993666.9914929168	-798511.948769233	-984278.7048096491	-1134078.1874379986	-1094508.2706182941	-1024312.6590818875	-837252.3108213933	-794512.0634546096	-879139.1505395975	-880891.6754531357	-843785.6828605076	-713556.7463986174	-1008154.4306198977	-1121265.1761277053	-1088046.3775169668	-1013194.5338057098	-828198.4654093626	-1028509.0837167609	-1155814.2532150669	-1114195.9779175948	-1037749.0211104926	-847931.6774657673	-1000184.4942802765	-1155331.3899709536	-1123308.1924172314	-1059330.4963515706	-877596.2019146371	-1043582.3591589424	-955683.659895156	-930095.3530250298	-875933.0008425869	-712558.4887865444	-1036510.4497670691	-1157223.4721816846	-1131903.605535403	-1063872.7097217839
30	-563778.9866876043	-777629.5871266567	-860248.1316664009	-886848.507267206	-792082.0180896049	-621266.5644261956	-868268.347298928	-945842.122620726	-970015.632651553	-879409.9878373975	-570001.4970178747	-810720.0538184016	-887060.9516573378	-913625.08050226	-825597.242109061	-546809.0446554929	-769631.4385159719	-838574.6594910274	-858956.9250195038	-769146.5279541038	-671882.9434335266	-840246.682432076	-904265.0845287077	-908892.0422942217	-796257.5673141404	-688031.5386295654	-928387.8181955109	-1001104.6477511965	-1020414.6538945037	-923377.4343133986	-638438.4818349364	-872537.7217353734	-943944.1803126219	-965672.0995906885	-870824.6001894118	-612643.7144351107	-829620.9086997574	-894109.5513677117	-910186.9459618797	-813571.3016906135	-779986.8968149524	-902863.777715505	-948281.9782335205	-930935.5215502302	-800433.1199251623	-754796.4503329352	-988507.2265920938	-1056367.1728596769	-1070813.6617234491
31	-629325.7451727376	-791150.8230525504	-844317.8595207073	-845376.8585634059	-756153.4512820519	-851701.3013154301	-1024836.4572728814	-1044925.1934862575	-1007620.7878969355	-854028.2672936375	-852252.1071619325	-1040416.1611796468	-1054796.3321781226	-1016879.3240310603	-861160.8694587965	-823121.695101012	-1025705.9317392542	-1042780.7826760898	-1011543.7705780655	-862066.7905405697	-710518.6954262962	-843033.443298265	-883599.7729125846	-869240.0720700923	-753973.8002438741	-891270.4001472658	-1065223.7848484865	-1087478.6374621047	-1052590.5826334024	-899803.225221266	-888005.1688408125	-1076329.9389088193	-1092990.422074296	-1057649.6539876263	-903249.7661062896	-855328.4456206821	-1057143.3801277827	-1076044.2590568406	-1046870.1428789613	-898686.8951693586	-791711.6526832662	-894916.0600676653	-922881.6220593798	-893103.2213132301	-751794.1506368482	-930839.4364791014	-1105611.049877925	-1130032.0814379517	-1097560.3773698693
32	-546385.2698042796	-809507.8580481104	-835280.61085336	-812329.5758838089	-714151.8602674525	-1014733.9266420804	-1111096.589370974	-1062549.827190563	-974702.170865518	-779612.5036932736	-1047222.9946786314	-1159459.6770351988	-1101640.4662019892	-1011657.366823778	-810251.0662470274	-1022240.6160751565	-1166724.7892525927	-1120344.5907308601	-1044772.0431714358	-851841.0657654105	-807269.0078045346	-886446.1225148387	-883918.7043810562	-844059.387289393	-711754.3753959654	-1039288.6058885723	-1144156.9371542628	-1104289.6368300358	-1023934.6821346085	-833898.6488720186	-1064575.953527936	-1184675.196477655	-1135982.2613137332	-1053787.7976661157	-858405.2750890672	-1033828.8243607869	-1184397.6908186846	-1146307.797957377	-1077564.0742238439	-890649.8164685625	-1068152.7457936844	-963384.3869815671	-932556.7332932155	-875789.1360561624	-709356.8894583808	-1063843.256561394	-1177217.2224375515	-1146029.4634604366	-1073167.193403699
33	-590216.5740873837	-776431.2088175628	-848987.9713219281	-861383.3373485713	-775310.6116277942	-721419.3776633135	-934209.225912008	-977985.3853396429	-971547.5058364519	-850201.819997934	-695284.198359862	-910730.0656471853	-951496.0908359401	-946056.2878940311	-825665.1301959761	-672419.3049046852	-884305.9952528044	-922755.2718998318	-918133.9175575932	-801586.7899831098	-686270.2197067096	-835432.1729645567	-890787.1502600622	-884419.6694417918	-777563.7986717249	-776367.101716134	-986059.6729014118	-1028580.2249080377	-1020992.5292084314	-896865.4955286889	-749303.3639660677	-961376.946375154	-1000911.4232527213	-994408.916245005	-871231.255650566	-723177.6696524401	-931689.3244278408	-968974.0860855698	-963300.0267078336	-843896.099227755	-782323.8677089982	-894433.1370836253	-932586.2714144766	-907455.939059835	-779816.9857342725	-831314.7538053658	-1037910.0573908156	-1079175.0739400212	-1070437.552611439
34	-593533.2146256233	-831194.9637013325	-936534.9404087471	-993895.9435570017	-806870.4060700517	-667263.9027563509	-948284.7065319666	-1061622.1648993294	-1134149.421377635	-1104812.3493531954	-601332.7003327732	-870527.9090872845	-984871.2875514948	-1062638.3764618528	-1043864.1656640363	-549289.4425290881	-789310.3227896644	-891413.5860341329	-957038.5286358821	-933214.2500258699	-699583.1577936576	-887119.8314401745	-971695.0396929759	-1016614.3475926064	-953417.7326844886	-728526.178929131	-999451.2441343064	-1104188.6069673991	-1167081.5443148098	-1125545.3371673385	-666172.483129289	-925498.482646103	-1030996.651934502	-1098927.9886407126	-1066920.6102588375	-614508.989291935	-846036.2173667095	-940082.7735103403	-996740.2193869075	-959706.6836549401	-805633.1009616919	-943044.6991319282	-1006855.0979966451	-1039332.6891282112	-1099965.0592989256	-789788.3854444604	-1050617.7191895577	-1146755.0633503702	-1200013.6672519848
35	-586151.410145188	-794900.1000376389	-872075.2750694946	-898204.6752484497	-815564.2068650941	-694288.7761265237	-932761.383176167	-1000633.0446229475	-1010620.293711585	-914236.4677629711	-653242.349790744	-886523.1868830062	-952627.9138148123	-965562.72983676	-871535.2889774197	-621588.4629348036	-839143.4722497225	-898966.9056454253	-908709.9440733022	-816200.2076294344	-687602.217681912	-851595.3027878291	-910881.696367915	-915185.2747061282	-814610.4748862599	-752367.9978334026	-985011.2777874927	-1048958.5429439687	-1055327.2314370228	-953542.9951518774	-712298.8063877751	-939741.6380951499	-1001882.8265257603	-1011226.6873195149	-911408.7688310617	-678763.9800173598	-891134.595444235	-947418.4754467637	-953987.5332485505	-855581.3213707105	-789053.0226657393	-908290.5055380194	-949688.0500269509	-932165.8219089848	-813656.7377680412	-810447.1570402815	-1037261.1098652277	-1097284.0515101678	-1100034.1691960515
36	-592936.0631227404	-783073.5398910672	-776408.1478995186	-860811.4921571413	-775211.0898395785	-700259.2996969756	-922687.5891152858	-978055.6520706994	-960499.1830270032	-829248.7710968042	-670932.2790818603	-896492.6874423655	-950020.3637131806	-932146.7584006428	-801262.0547149252	-652777.3427202688	-874420.3783170674	-924122.0618497732	-908454.0214560465	-782018.0380732518	-692905.6407351514	-853446.9932919398	-905728.6963905176	-898846.5508843124	-783510.3952535186	-758434.4742201214	-976990.2624320354	-1030206.4819877716	-1012365.3511036881	-879125.6681036717	-728212.1887611701	-949565.8803444789	-1000912.8527040621	-982904.5778639386	-850092.4816015764	-706090.2243098675	-923510.9535741501	-971158.3310263593	-955310.1312016324	-826871.8639063932	-792875.2139620166	-923820.4466639602	-1035049.1780161676	-936881.5426970854	-791809.7050241522	-816609.5862432672	-1031292.8732199328	-1082357.3118759915	-1064231.5103804294
37	-560633.7614519853	-769926.7697880364	-854726.8182927059	-888149.8559122174	-758254.315089068	-611456.7761349579	-855059.0069784711	-931400.8067320453	-958839.601784991	-877692.581028166	-561310.8319346709	-800886.230291771	-875792.5811157039	-906228.7205432385	-830550.6929679688	-541612.9307854037	-766429.71487814	-834572.4227958958	-860076.6230955932	-784148.9300320988	-668545.7629063826	-834716.6671319914	-901398.9361340523	-918845.5868264426	-832055.6706188357	-679402.8429452488	-916806.3584353091	-988585.1157033717	-1011117.1461960642	-923005.8138415565	-630593.1741274954	-863916.0475368948	-934166.7006225847	-959658.0371333889	-876555.0313011993	-607794.162650886	-826962.8777030053	-890831.7005945375	-911790.1561896653	-828411.5374184934	-776457.7643607797	-899506.564455006	-948071.0010450829	-949541.2552406677	-905857.0261486035	-747348.8440726249	-978553.647371207	-1045769.4310405274	-1063394.6906071375
38	-644221.1662521764	-828840.7999261266	-856800.4213668407	-913210.840881689	-827294.5769426274	-847611.5461381881	-1065023.46515471	-1107839.910746823	-1102439.7384186029	-976140.172300159	-828483.1825287272	-1048001.7949211259	-1085390.036444486	-1083261.2012217646	-958599.2554965324	-781920.1815075476	-995454.6902404411	-1026535.942591495	-1028689.853863921	-910705.2634198098	-732179.0537114022	-877062.4032127355	-889307.3863036524	-925753.5006115458	-822603.0224883307	-888345.3368019827	-1102106.8067795995	-1143548.968089126	-1137112.2356509827	-1008605.5572245079	-867901.3972558577	-1083531.8603028576	-1119721.7088288444	-1116501.6115662637	-989582.0246827346	-819875.8237841196	-1029598.2144359385	-1059719.543074684	-1060650.429142491	-940230.6987781664	-820136.9496912136	-925284.0021829951	-921814.2908986388	-938296.0935811099	-817911.4766667322	-929079.0649657771	-1139190.0859605453	-1179258.0425286563	-1171784.7157300788
39	-582995.4609779597	-819618.9464017176	-908709.9522069271	-939382.8872011007	-867184.4164540648	-665568.3248874028	-935399.7933596275	-1030457.4147120734	-1070412.547175643	-997401.2830359319	-606162.508781507	-860739.3657685069	-956517.6856002887	-1000881.1820425142	-932362.2816604814	-562548.8376965475	-785865.0043128371	-871377.4529906713	-906906.6482064968	-836369.8566787757	-690812.6146977111	-873316.2189959439	-940932.4891785324	-949456.7427752216	-862711.038711304	-726960.4565210424	-987558.382867708	-1075485.3322115655	-1108492.019089939	-1026944.4129280737	-670897.9390182629	-916577.5752379887	-1005095.2502070798	-1042461.2425907152	-964535.0898467957	-627214.3372423381	-843123.6336086334	-922226.8048486663	-951650.8040347889	-871610.0817109479	-798629.7713251035	-927013.48581265	-973154.9579103789	-959530.5185545435	-858237.6725235835	-788352.5256924436	-1039716.9214308289	-1120513.2381937788	-1146571.5024837523
40	-585159.9093347127	-824007.4089606152	-914020.0287939993	-945422.6187836007	-873754.9830708299	-669958.8316941989	-942287.4277701997	-1039493.2546219918	-1081609.09926181	-1010803.0803483512	-609579.7994186623	-865877.3292161999	-963986.5458476122	-1010653.2572536834	-944477.4751161146	-563752.3402328985	-787542.8799181537	-875035.7108301267	-912438.128772259	-843995.0532064233	-692906.5847814805	-876896.2882118485	-945190.8037925883	-954296.2215191282	-868392.077586111	-730821.8768101353	-993643.3925841057	-1083460.7868767406	-1118369.2245394043	-1038770.7202190266	-673955.0856961951	-921109.1689145716	-1011692.896445988	-1051096.8381088052	-975219.0264073098	-628316.2627780762	-844520.5132717441	-925374.5605407555	-956445.1321529277	-878201.9797827483	-800653.2632650955	-929785.161428827	-976361.510296362	-963169.7436913309	-863029.1841699015	-791684.8594655114	-1044999.3069665212	-1127428.30710242	-1155129.361806629
41	-609828.9030177841	-826469.314719021	-908110.8263492016	-901895.008956046	-859616.9434393803	-738480.3807047862	-990204.3943061673	-1072094.540295429	-1092406.1865403736	-1008194.9527468735	-694477.1770833908	-939550.1926713742	-1019513.1704156867	-1040909.1335114829	-961865.3447940545	-648594.7476883058	-874149.5210285645	-944264.777478402	-957220.9054605289	-881124.0128873298	-708779.0508799022	-879809.5585518868	-940638.6419860009	-913600.8990646487	-853925.3620486256	-791595.9356891075	-1036170.4738415573	-1112651.720549926	-1128156.1641974084	-1037445.8579267894	-749016.987321589	-986980.0751517664	-1061485.648379216	-1078203.9128218547	-992049.0381068792	-702516.0737557757	-921792.9914099912	-987031.5735706917	-995972.802461025	-912567.0665372554	-807729.198695617	-933149.8023383495	-973166.3951228003	-925306.7195735765	-848233.7806578709	-844711.4281270255	-1082136.4766775977	-1153208.9149573692	-1163906.1135485498
42	-568662.509982508	-787029.698879266	-872010.7589191883	-900655.7342092781	-804130.3385260855	-630291.387593368	-882818.0760309985	-965501.7503851521	-995113.6320448015	-909812.1343787198	-576747.7644356219	-821583.4210739961	-903391.5049994248	-935590.9094488341	-853063.9566089261	-548687.4218431368	-773195.7441505231	-846774.9418948581	-871629.3835001416	-786429.4741317496	-676551.3295211543	-848111.4353116268	-914061.468974702	-920208.7155309634	-806423.3346585389	-695974.466697432	-941264.8948837435	-1018507.6134228548	-1042636.2458800895	-950297.2119574939	-644455.6517977829	-882131.655999895	-958403.5841097707	-985136.1846438119	-895119.5952086687	-614337.178479566	-832590.3132965665	-901183.3818295752	-921186.481255679	-828524.643967887	-784440.1451381834	-909193.171718356	-956112.1204262013	-939761.6421958829	-808716.334738241	-761657.4833014961	-999711.6512364885	-1071513.476434926	-1090158.844080172
43	-540664.8075701024	-767592.9566542516	-813498.1725367134	-808138.3770904588	-716596.1187620284	-802919.3675417913	-954732.9509800423	-951228.9539293197	-900819.4677287779	-739987.4345119329	-802313.0722203983	-963543.9529182403	-953548.6575897018	-902581.5454141421	-739076.6822797228	-792077.1771578044	-968788.1234704393	-963698.7294493467	-920726.5975339266	-763389.3019974336	-729923.5295666177	-842143.8800346935	-865565.7984148716	-842399.9146627757	-722682.1683954773	-850521.7970318008	-1005363.9663816328	-1005806.596906826	-958817.0578776901	-799338.3808431324	-845902.1694640873	-1009691.0154848613	-1003891.8122156303	-956544.5386992419	-794903.7503645819	-829842.9223538763	-1008168.4247806813	-1006860.964845147	-967013.7134293658	-811505.6238851151	-919182.2515572787	-916694.8034151356	-917633.3606777884	-876661.3896619141	-728768.2174669149	-898124.1819066489	-1055994.9192832233	-1060384.2488413872	-1016814.6480266021
44	-596853.2910827537	-810289.7452749364	-896936.5738253741	-819529.0539077077	-843834.7507690762	-698307.0970579075	-945743.5444859646	-1030793.9462438792	-1060920.4975039107	-956640.1690666734	-654730.1483154786	-898689.2340871103	-982896.5332166397	-1017462.466595514	-914749.879947034	-620255.7651730123	-849452.0860558824	-926112.640519711	-954703.8520718901	-854971.8900217939	-697893.64650105	-869074.7020937277	-948314.9962202958	-954554.5716186468	-860127.6532235097	-756352.5794073775	-997260.2317929091	-1077014.5845219025	-1101945.5690179006	-992887.7439601285	-713721.3607237539	-951056.4134937632	-1029819.1683307837	-1059130.038608539	-951332.0629039722	-677310.0181748089	-900450.19910925	-972042.1039247602	-995851.9517317485	-890859.6904633846	-798934.0079736976	-927859.6650067013	-999693.3621695688	-1089580.0268375524	-876420.5556381119	-814397.9932024962	-1048776.8444911512	-1123235.222799926	-1142970.6283833568
45	-620977.3930950329	-844615.5954746675	-927715.9553316801	-961820.2203982881	-880189.5552580212	-779918.6525152393	-1035068.2836523837	-1117146.4580408572	-1139661.1978952403	-1060906.4336759415	-736494.0146860217	-981475.9340259968	-1062877.4097734818	-1089512.167902635	-1013762.9081526904	-679418.5083090637	-900273.2250873783	-972772.3766077723	-993506.624908301	-917880.4561835974	-717088.3259809811	-891108.2792146206	-955050.233181508	-965301.6358792728	-868157.610543997	-827778.3291022702	-1075251.084439484	-1151662.815841384	-1168881.8038943787	-1082961.7848129643	-786295.0373000883	-1023772.4568883886	-1099422.2974431328	-1120745.1237663508	-1037179.626180447	-730029.7193443722	-944481.2070079515	-1011899.7196371213	-1028003.3474845391	-944428.001404766	-813199.2545998099	-937600.9629545736	-982384.4399409506	-968783.0059848817	-856125.6572395876	-875637.9431893012	-1115433.8226704376	-1186179.1907665348	-1198102.409949663
46	-656562.3757450099	-689180.9081304332	-857911.9163359882	-854268.6124437297	-758948.3317351515	-861601.9142637735	-1050224.3471511758	-1050758.0530668632	-996659.4825476053	-836869.421804297	-858857.3036442655	-1060063.70294808	-1052957.8323747008	-997515.8040432294	-835581.191979289	-832221.5447106087	-1041839.7065473406	-1039578.9773291775	-991996.6708963882	-836582.6285070034	-757947.4991954784	-882622.7722987828	-917808.8064378067	-884494.5441527585	-761478.4788626585	-902276.9382720366	-1090406.3501441383	-1094450.8966991252	-1043930.7782496306	-885271.2011109389	-895903.3592044942	-1096019.2124763564	-1092661.8146723786	-1041071.6926178727	-880713.7366805284	-864985.8497827488	-1072909.248442153	-1073971.0791020936	-1029825.6953179461	-875942.0508520062	-859332.6154722181	-1076064.6364388152	-977705.6412605494	-914720.4133806657	-764008.6268868817	-942951.8853384512	-1130588.3050789493	-1138143.740331387	-1091202.0739044603
47	-622702.8781413211	-758126.0999844803	-804892.6443012692	-803153.1347466001	-712298.4504725084	-823777.0151234241	-985909.2935771378	-987396.5685078627	-932992.8860165481	-762525.9790451216	-831841.253325156	-1014767.9076514277	-1009907.2218934378	-953494.0501647019	-779492.2364705285	-816544.7497502888	-1023985.9026072302	-1025177.8305820852	-978008.1262245462	-811379.6412043169	-701800.0196176459	-815756.3971039642	-852432.7950658314	-835515.2927118923	-715824.4285660686	-866398.0418503468	-1031178.3676067635	-1036778.2074031197	-986720.5397305465	-818942.7824935371	-869373.8964703007	-1054097.2186667693	-1053507.9692578032	-1001641.5621080679	-831128.6505794977	-848789.2918979176	-1056564.9521820103	-1061310.7789431168	-1017900.3566813392	-854767.3363689388	-780897.1637726813	-873386.6928876361	-899972.8833339369	-867877.3881098625	-719350.4073328498	-909019.0060772696	-1076447.3574870222	-1086159.8463338094	-1040448.1988303121
48	-607588.9612527813	-857370.7850866837	-971486.1060235014	-1039074.2085848022	-827640.8259680675	-691106.573564283	-988113.8430573563	-1117257.0840021912	-1209047.6390605192	-1201845.5097752486	-618431.3809333353	-900281.1632424027	-1031473.3587770481	-1129461.8121593986	-1134998.8148799571	-552569.1050657313	-799085.6836682286	-915698.0318652805	-998463.8973059239	-996899.9398052844	-712843.3708494831	-909508.2157117818	-1001727.8859924523	-1058384.4317981876	-1005267.6642180351	-749513.3108557937	-1034759.9031349474	-1153578.2844749894	-1233714.7509898338	-1212076.9949072823	-681373.1537866145	-951808.5583792771	-1072365.6453453386	-1158428.7694236618	-1148251.1518407518	-617377.7877918293	-854184.9859262297	-961124.4789261285	-1033033.7273050959	-1015800.3609308256	-818097.7804461847	-961645.6462786199	-1031969.6300861791	-1077694.5925115726	-1182894.5024680027	-807919.9767917991	-1081405.9006542787	-1189899.5026587981	-1258381.8629191488
49	-543532.1647351424	-788602.6212431677	-824416.5263379358	-810239.1975133993	-715370.9446728161	-909090.5070114941	-1033109.5542225677	-1007028.064297897	-937852.8558605892	-759849.3305233248	-925073.1206574638	-1061745.8695281409	-1027779.0416260097	-957255.3331690795	-774752.5370413634	-907445.6139542118	-1068003.0284240444	-1042216.7957055797	-982903.8452420302	-807725.3692972488	-768692.618869212	-864350.1891059838	-874765.113831559	-843231.7182009042	-717204.6590138022	-945140.3505227051	-1074933.3478250408	-1055170.798364464	-991456.987806414	-816661.5669951658	-955511.466033819	-1097401.0858600582	-1070101.5834106794	-1005287.3052688054	-826733.6173326497	-932089.9810254881	-1096502.588695756	-1076758.0919824606	-1022426.6077280018	-851176.3110403623	-993853.0729947953	-940097.7569687999	-925113.637208547	-876224.1762823306	-719038.372540106	-981190.1574594835	-1116757.0789275137	-1103313.54541503	-1045061.1197522387
50	-680398.1377728493	-683005.236750662	-871303.8070584956	-864171.9098277624	-766673.0406909967	-919075.9884371725	-1102822.313950736	-1094353.7258186734	-1031399.3863730405	-864367.0485765549	-923107.3367181761	-1121458.1974653283	-1104521.7508971654	-1039727.8520455747	-869862.0157470243	-890069.736944063	-1099098.653718703	-1088415.3800710016	-1032849.1668551088	-870074.2695351904	-780220.2591434291	-900141.971350001	-931981.5369954352	-893060.9267903542	-766666.245884039	-953391.5276759769	-1137148.7109321714	-1133134.6253543694	-1074674.789565406	-909533.6907539289	-953175.884123219	-1150877.851873985	-1138674.124430252	-1078683.3968509473	-911242.2391451352	-916169.7822806298	-1123830.352126355	-1117359.918609491	-1066096.4537400014	-905703.8008118338	-880042.3719418689	-1117278.7059155027	-992659.2130609107	-921949.8812755042	-766659.4521485989	-987706.9871577097	-1171475.0626706781	-1171915.5248900654	-1117950.1927013758
51	-635708.7340566557	-828444.6386847075	-767069.8169930982	-902633.7898721291	-815971.4635049613	-797616.5313689375	-1026456.7047795731	-1088135.6610573137	-1064097.7569243968	-926566.1895639298	-774253.4705521624	-1006891.9726227489	-1067861.0830380542	-1042398.5035566085	-904485.8579549156	-738332.7791542327	-966541.0309558217	-1022628.0841897688	-1000365.3786678688	-867524.3437511954	-728798.3945833268	-897712.6239726192	-949942.2391890665	-941362.3175131207	-818986.9053055774	-844762.1968737023	-1069150.3494158713	-1128078.138756095	-1104365.3761643036	-965415.4718932734	-820185.3848698421	-1047996.880478177	-1106143.4467948421	-1081197.702316273	-941974.820134137	-781699.1286149784	-1005062.9414214642	-1058505.0982541644	-1036663.5603454369	-902430.8219127805	-821888.0475260805	-966980.6092106367	-1132814.591336043	-980090.7750203006	-822002.3546402168	-891907.7998784673	-1111843.9315022754	-1168020.6164049823	-1144632.9801864815
52	-631753.8568784943	-817701.1836271023	-893381.3518999934	-904397.1995453093	-816892.2969020979	-836276.7732502667	-1048437.8840606168	-1090031.6833769311	-1085250.9784338912	-964864.9178279217	-818585.4000165348	-1033727.3698123598	-1072593.5679954314	-1068659.8628883767	-948905.1501077816	-774131.041649129	-985457.5743748584	-1022052.4672920533	-1018919.5805875463	-903194.1239279739	-717893.1824752328	-867130.3893099147	-924714.7557922705	-917000.5942854158	-809274.4552845433	-877595.8120403722	-1086645.2364339712	-1127038.7239706567	-1121086.662621757	-997912.4046361861	-858626.8279157013	-1070384.557774397	-1108070.5089122804	-1103048.3260299102	-980497.5463104262	-812863.3243631468	-1020810.524738039	-1056300.3052282254	-1052079.0522484663	-933483.9475419943	-804032.5122246917	-916559.5949440624	-956048.1054034734	-929603.9265687799	-801656.613699432	-918914.7718385543	-1124852.5263073256	-1164045.7810563059	-1156922.3468636945
53	-670299.5328485925	-685621.7113292179	-865630.0042475149	-859976.1351085835	-763400.2783681963	-894725.687918704	-1080537.895860492	-1075883.3502958135	-1016680.9744577849	-852717.0048815655	-895886.2350967538	-1095446.9147578569	-1082675.43270953	-1021843.6830678191	-855338.1043527045	-865560.9321378308	-1074839.4970285532	-1067724.6408097371	-1015541.0054304786	-855884.714755542	-770783.8583678021	-892719.5331833072	-925976.9122457727	-889431.5687783867	-764468.3212056998	-931735.5787848481	-1117345.163880724	-1116745.3153658658	-1061649.3354724227	-899254.2922141525	-928910.9748875361	-1127635.6444164733	-1119179.8813951612	-1062748.2762899098	-898308.0906602164	-894484.4544877855	-1102256.3782037564	-1098977.1730612083	-1050729.4577455085	-893094.5058227422	-871268.1759073429	-1099817.3550058978	-986323.765776197	-918886.9399691889	-765536.3650406618	-968745.391086659	-1154152.3854652892	-1157607.280435918	-1106617.6964345626
54	-582015.5460616169	-817632.1492079392	-906305.9109008088	-936648.5077690699	-864209.7110440216	-663580.6021972953	-932281.5412303135	-1026366.6013268572	-1065343.5103623543	-991333.8612601854	-604615.3921416579	-858413.2455788937	-953136.2939668976	-996457.051416726	-926877.3465524141	-562003.9736513754	-785105.3764250717	-869721.2428004278	-904402.3702462772	-832917.6866169794	-689864.6075470395	-871695.4072933875	-939004.6141170763	-947265.7561463737	-860139.0509268055	-725212.2681996417	-984803.5045780112	-1071874.5891016005	-1104020.2926467948	-1021590.2658154842	-669513.8710538752	-914525.9780147823	-1002108.2849870098	-1038551.6326278453	-959698.1304579318	-626715.4603503116	-842491.2215605716	-920801.7152889835	-949480.2585366031	-868625.7188697581	-797713.6718816073	-925758.6597175475	-971703.2492090575	-957882.9250768146	-856068.4021321657	-786843.87173899	-1037325.4167482855	-1117382.5655907693	-1142697.0861798078
55	-617677.1334942041	-782535.6808822727	-837563.7851778555	-840239.9177094487	-751639.0397205313	-816777.5126106587	-994876.7882049447	-1018228.9867730236	-984434.3056356411	-834635.8100235433	-812663.971685508	-1004222.0288985597	-1022149.7728368116	-987964.8382078697	-836471.3077219725	-787864.5295771786	-991681.3856370352	-1011682.0741295592	-983461.6130044261	-837885.1407076691	-702327.7272430112	-836870.4532537365	-878881.4547451161	-865723.5860293818	-751631.7766317307	-860480.7374951874	-1038920.7081759122	-1064010.5070659372	-1032198.6372817291	-882766.8474619152	-852962.6749351125	-1044250.3919624578	-1064019.5434248957	-1031969.0880483367	-881292.5566891581	-824329.8236808599	-1027058.7098593463	-1048509.0810107817	-1021975.5313797805	-877186.1936199074	-786978.3271368428	-891205.2225749673	-920199.0602811839	-891207.1903019194	-751624.5147986701	-904183.8998797163	-1082964.565606372	-1109792.0273588507	-1079962.9689278172
56	-573665.7726167773	-794196.1028651132	-887132.3526692222	-930037.6097161056	-777511.9433878992	-633562.891193056	-891987.2304056068	-982983.615253928	-1028282.6868773493	-967658.4336803439	-577164.1481903291	-828472.4376006881	-919000.4396965066	-968185.1418689869	-915047.6462487365	-544653.7225645969	-775493.0976701416	-857088.1366599192	-898484.8187847867	-843196.1398501244	-680840.1823474063	-855474.4170778745	-929244.3717887497	-957573.3910591726	-880129.1671439719	-698861.3992809737	-949543.3485444731	-1034377.5482064418	-1072897.1936292597	-1003235.0296696249	-644686.7199897863	-888309.8566881467	-972522.6270850436	-1014825.1413823371	-951961.9487740983	-610454.0152415641	-834518.139309798	-910340.8556169384	-945440.2647854923	-880419.6909463279	-788014.5920780352	-916752.7312593379	-971356.3427114551	-985109.1099022396	-982746.3909000445	-764159.840111598	-1007099.4041520413	-1085771.4906735423	-1117511.7003811703
57	-637583.2112912686	-830432.9898898369	-766660.572297568	-904466.617779628	-817757.7534616517	-801883.132224329	-1031004.3011938618	-1092959.8271971883	-1068637.8794855776	-930831.0456382621	-778781.4370559001	-1011730.1307800427	-1073025.3559455415	-1047230.1958932993	-909009.556499308	-742082.1760095429	-970578.143028524	-1026945.0298543002	-1004393.3185400858	-871271.587491405	-730371.3650924615	-899652.528944065	-951879.8614517844	-943225.5361271966	-820541.6342716232	-848545.4385393942	-1073189.1896664149	-1132367.2838695606	-1108397.2018322959	-969197.0517958408	-824216.0347810122	-1052310.5383560276	-1110755.091302914	-1085505.3179054314	-946001.4882865276	-785012.6268548458	-1008636.8904248688	-1062332.9987128128	-1040228.8076764573	-905742.1312970571	-823159.511169571	-968872.0679474768	-1137099.0804174887	-981984.3841998655	-823325.5227548617	-895207.6823544594	-1115374.0155881515	-1171774.7404911167	-1148156.5086800307
58	-543309.2162767798	-786969.0360072845	-823567.5807731772	-810075.8503446887	-715466.2068458534	-900835.2773679852	-1027015.4606517827	-1002689.4608667118	-934973.3621956226	-758304.9888731504	-915528.0371634185	-1054110.2787536932	-1022007.3331390679	-953004.228060367	-771978.597011551	-898475.2577526683	-1060288.673764748	-1036111.702821139	-978069.3161883206	-804278.0631943084	-765678.1675139645	-862623.5599878086	-874049.8303589774	-843167.0421574913	-717630.5572197181	-937783.380525911	-1069524.0508838878	-1051332.5347719598	-988919.1030436105	-815314.6201642607	-946988.9059599035	-1090581.277985601	-1064953.5095688677	-1001497.3607179463	-824258.7181966305	-924139.8643184111	-1089634.2550588697	-1071323.3115061268	-1018118.0341369907	-848091.7568553165	-988047.1187428675	-938278.0839683325	-924532.0158671278	-876258.1713667735	-719794.9067985469	-974731.4464842054	-1112032.5786159926	-1099975.621348096	-1042864.8438915983
59	-566991.5559985428	-781766.8021157318	-870536.176275295	-908585.2077036115	-767649.3380544196	-622241.461321666	-873074.803201344	-956565.9861175998	-992718.0923812169	-921583.3051946483	-569045.027858887	-814344.4322662039	-896871.9589783944	-936454.7687447052	-871773.3609027959	-543096.4108980667	-770851.3751237993	-845556.9347799921	-878814.4383113739	-812955.6908477051	-674543.7160915675	-844843.5391654719	-914983.6052011139	-937739.3262069155	-855508.797705405	-688895.890625363	-932777.4203500699	-1010925.4033197738	-1041257.1486630662	-962146.4241753116	-637468.848794427	-875816.8067390196	-952879.0157831181	-986571.8503666762	-913343.0360549961	-609091.7978417878	-830648.7862273362	-900349.4333405364	-928206.6919197456	-853784.2255396568	-782095.8761845923	-907920.2761892186	-959430.9835058983	-966893.3822102195	-943368.2573563905	-755550.2534780693	-992479.9749728023	-1065284.8284239292	-1089796.2049449156
60	-610256.952840868	-777047.8242155904	-833261.4311160081	-836967.6797643802	-748763.3537371345	-794531.0141918047	-975792.4403930996	-1001223.468687461	-969664.4865497124	-822282.7897471979	-787446.2783611484	-981166.3199842232	-1001353.8724576448	-969546.2734700837	-820744.0250727846	-765405.6696948865	-970007.7059150576	-991872.1567017208	-965573.2424344076	-822481.3985959373	-697110.0699527689	-832944.6206517804	-875875.8799909115	-863483.5798889857	-750139.904572118	-840867.6827004502	-1022165.6144329623	-1049061.277755073	-1019208.9418091592	-871914.6528707076	-830640.5611502655	-1023815.6792097064	-1045565.0563841285	-1015610.5344448546	-867305.7859893936	-804583.6615504982	-1007894.7361216665	-1030969.137104844	-1006117.631767679	-863490.2190202565	-783963.1926629005	-888841.4143091519	-918490.2649708699	-889999.416103885	-751516.4565511037	-887204.2887090959	-1068538.7259359218	-1096899.0868226849	-1068753.397068606
61	-619137.3999509917	-841988.9310417214	-924776.2401667227	-958459.1618719941	-876775.1448695045	-775394.4906069526	-1029663.0092130249	-1110990.5978548997	-1132843.4612834482	-1053157.284653923	-732095.5030098995	-976459.2083243104	-1057052.49689191	-1082963.4333966363	-1006248.4657160565	-676363.1204062593	-897043.5007094559	-968872.9443718172	-989026.4839859745	-912508.2902208016	-715530.4593389145	-889020.6538393177	-952716.6363082658	-962653.7921387048	-865328.5055439982	-823794.1058077139	-1070483.361851484	-1146236.5466599187	-1162882.270870516	-1076124.083030664	-782385.526468488	-1019332.7794587407	-1094268.904988429	-1114958.835623429	-1030534.6589565116	-727321.1494521238	-941662.6964815886	-1008492.9228382951	-1024092.8019892123	-939733.8831549259	-811923.5145502869	-936052.3766369141	-980656.9615417537	-966848.3766665712	-853881.8578104367	-872193.6585084753	-1111303.6519349888	-1181482.5122260936	-1192921.0805125386
62	-544915.9910235121	-798742.1764135015	-829685.8751306396	-811253.0825514597	-714779.6586854431	-960330.1696721815	-1070935.1886717821	-1033957.4879278304	-955725.681983905	-769434.9566784983	-984318.8205863023	-1109139.4748417593	-1063603.653250142	-983641.6605169596	-791970.1987547879	-963124.019711792	-1115885.5159449172	-1080110.7021648483	-1012911.4463061817	-829122.5695485688	-787403.1184216244	-875067.2614802194	-879204.8308866334	-843633.1581110959	-714561.1371081352	-990804.5751559882	-1108508.4950305591	-1078994.645813378	-1007209.4701398409	-825021.9766043306	-1008410.4309385987	-1139731.1808408387	-1102055.3361708042	-1028811.239632209	-842095.1520597376	-981435.8279340628	-1139133.8798642368	-1110491.4138000072	-1049169.6381324618	-870321.934205993	-1029890.2458099802	-951392.3465469374	-928723.7222840122	-876013.1710487758	-714342.6145942024	-1021278.9479459294	-1146081.7388893364	-1124031.818626384	-1058693.2582957766
63	-620423.5822992907	-841280.7004493742	-924786.176028687	-915699.6442034864	-879293.2795811488	-762563.3065480518	-1019629.0660849186	-1106452.5363139198	-1130828.725398532	-1052006.78233001	-717648.6922875085	-966819.4977095184	-1051921.039331113	-1077365.1104425543	-1004240.4393186744	-664461.0334591111	-891826.9598621852	-966033.1501926655	-981735.5914414707	-911466.9731124453	-717907.7014004684	-892019.4639980432	-954037.2924547931	-923846.2524985338	-870623.3669546745	-812848.2053642068	-1062193.451403118	-1143035.9694136002	-1162087.9432332253	-1076244.2268865495	-769621.9097376113	-1011156.3289390443	-1090217.4817123548	-1110471.9874429067	-1029627.9055860778	-716554.9076892876	-937235.0492548284	-1006055.156343648	-1017320.5192185593	-939116.2364303255	-815391.820448735	-942758.2274938012	-983288.3463808992	-931992.7901981839	-861953.4543282003	-863133.0416274506	-1104757.7580305226	-1179619.418651164	-1193347.1287921509
64	-619133.0672173045	-783103.5649491677	-820268.4177680098	-807579.9442129611	-712421.8633031269	-929511.8484184714	-1067546.9621150126	-1043782.9296981997	-968149.9609916753	-779895.3610828125	-948712.0973483713	-1111861.0133910417	-1081663.1946090043	-1003879.7772600894	-810066.8664085489	-919524.7518881571	-1117874.571723291	-1099583.0734902339	-1035218.1956613064	-849750.8516328849	-691813.4880993733	-836602.3869660207	-866532.2728639055	-839083.1947100197	-712021.8339977699	-960772.2530744455	-1104040.499598526	-1086995.677528273	-1017874.5868494062	-834134.5704556154	-973685.0589362176	-1140976.8463783187	-1117698.9623571173	-1046666.3418830255	-858343.346724544	-939357.9361845488	-1139901.7152019294	-1127550.1902058097	-1068935.2019165854	-888966.7462309665	-764493.9062547431	-890101.2125773744	-912796.0663607975	-870586.3827118205	-711621.8060439072	-992032.5951829988	-1140533.98909282	-1130208.410847566	-1067599.2272179178
65	-643348.2076188097	-836548.2081404334	-765401.9311557965	-910103.5206774796	-823251.5278591681	-815005.157826041	-1044990.534871929	-1107796.6572030585	-1082601.1271625753	-943947.7051271113	-792707.2985085028	-1026609.9935459525	-1088908.1918617813	-1062090.172884476	-922922.2917482429	-753613.5292328435	-982994.370786983	-1040221.8920336147	-1016781.3369924321	-882796.3187614386	-735209.0707957075	-905618.7497280017	-957839.061714378	-948955.9063174606	-825323.2377043405	-860180.8822280011	-1085610.7324741706	-1145558.6448372097	-1120797.1711357697	-980827.3846950859	-836612.3880182913	-1065577.2888744534	-1124938.3063145652	-1098753.4852309127	-958385.5955363298	-795203.3642142646	-1019628.6498866484	-1074105.7915100849	-1051193.8049517393	-915926.1367825379	-827069.9258174383	-974689.2912619173	-1150276.121655349	-987808.221248622	-827394.9556510276	-905356.5441299614	-1126230.86752276	-1183320.6324177086	-1158993.1987449776
66	-604860.0734262689	-856705.0379727851	-959197.4928685076	-1002997.4131646375	-893434.6823479694	-697185.019390589	-990663.3133862164	-1111222.4893496127	-1181144.571284232	-1135158.3776134853	-626752.3263299649	-902104.676262358	-1024436.5384671234	-1098405.6312948752	-1056652.2433153843	-562610.2954151756	-799615.0262033518	-907556.9274910315	-965559.9520959762	-914533.8166283419	-711154.2568304635	-906406.4150087909	-986674.0533916544	-1004089.9571514847	-881773.8523446908	-754848.8951179676	-1036712.1308739752	-1147501.562252141	-1207346.7299191463	-1149831.5031486403	-689056.0106635466	-953243.6428266391	-1065579.3166085684	-1129407.5254440974	-1075198.5198844522	-626889.442180831	-854600.0805880137	-953615.9006220868	-1002717.0387252601	-939361.5383762189	-817448.4321835611	-956107.7919921752	-1014150.5594132767	-1005182.4547405259	-870113.0304451308	-812512.7083453462	-1082760.885861734	-1183780.6351020478	-1233548.8564549151
67	-631746.2349770484	-695610.5884619482	-843969.2093677468	-843957.9866847503	-750905.9010121106	-801763.8980287786	-995462.9954191891	-1005369.2649668938	-960490.7062949089	-808240.8016675372	-791964.6293825365	-996144.0172028376	-999273.0599261998	-953567.5499825181	-799890.3780137785	-771994.022722396	-982225.6656129591	-988733.9049699857	-949463.8880447176	-801713.4568256121	-734758.6476910121	-864382.9984124189	-903053.1432383793	-875575.8212204477	-756077.3359697398	-849059.9761097525	-1041741.4489008775	-1054176.0838101164	-1011922.2478870191	-860010.781173099	-836275.1820621127	-1038904.2053689542	-1044756.9918822874	-1001912.9971383342	-848929.5791733385	-811696.6924047839	-1019893.7301796702	-1028797.6314180439	-992063.0995296864	-844956.1828255791	-837771.0546871761	-1033155.4083403192	-962137.0203644285	-907193.5932711918	-761248.771642094	-896355.980179893	-1088019.8513933995	-1102982.902653339	-1063353.7894415122
68	-576898.5099499197	-800216.3846233652	-895170.9109128196	-940428.3394209069	-782289.0152582488	-639046.5623268043	-901147.6926711737	-995779.3126139438	-1045508.8272533756	-989975.4779875511	-581096.742067492	-835315.507416978	-929718.6362782179	-983554.130869607	-936008.0683933629	-545408.0252568374	-777741.3719806656	-862673.4133965771	-908012.4048598004	-857843.4661286903	-683889.9517355484	-860623.611039846	-936151.7461195628	-967180.2596376783	-892054.3400882185	-703688.313616767	-957664.1281204239	-1045736.8774961539	-1088222.4310968402	-1023136.7914112688	-648182.7829757106	-894361.016140331	-982037.2471889185	-1028509.9637180291	-970667.4850270452	-611113.8216721917	-836392.3071530486	-915180.3215275698	-953787.553699418	-893320.8999317419	-790881.3935211771	-921030.8374224593	-977132.5343036803	-993932.1173544497	-1001819.664918188	-768329.9972588939	-1014180.5010358067	-1095694.4526740354	-1130936.034940305
69	-606520.4503735314	-773851.1086571165	-815651.8923411944	-806968.3292990759	-713447.4773795203	-875588.4557530322	-1024861.9280593237	-1011574.7641539727	-945896.1487154255	-767395.6767850309	-886359.3495012819	-1057343.1888630912	-1038074.6227493865	-970743.8356692931	-787717.8931512625	-862433.1986221429	-1062907.4350305824	-1053421.7925945811	-997640.0334056773	-822253.4162687366	-684659.8182638218	-830083.7217541191	-863346.8879379005	-839301.2024569829	-715417.6398483933	-913097.9652100026	-1066369.1146444443	-1058604.6130591594	-998303.2538057996	-823234.1747893442	-918447.8960894436	-1092459.849741846	-1078889.2080600928	-1017152.8768751471	-838388.4504796033	-889270.6402189278	-1091111.848441328	-1086498.1862152007	-1035462.2288700398	-864334.9741825801	-762799.183832745	-886316.3379112893	-911041.821801667	-871634.0131189271	-717387.8034678571	-950607.4121266013	-1107876.2510832758	-1105634.4496106356	-1050710.3712498844
70	-621432.3929368979	-845421.5131169668	-939255.7896250379	-825839.5796654356	-892749.7489998537	-749983.2965246702	-1010698.0424152967	-1110808.5893262997	-1156176.030435823	-1059107.4203657117	-704020.8663196239	-959020.5881678135	-1059288.7993901074	-1110367.6212140983	-1014936.7013734018	-653565.5810538769	-889265.6669411927	-979956.5730219833	-1022382.657337485	-929691.1526811469	-719187.41853992	-899058.4620987347	-988861.352426785	-999341.2462630176	-909336.6851269072	-802036.5977760582	-1054866.858303575	-1148123.3225359146	-1186694.4339409603	-1084060.5191117222	-757571.5724892115	-1004663.4916566436	-1097859.2242370644	-1142022.3856525319	-1040597.9026700872	-706731.7600553308	-935320.1640950507	-1019440.1073476161	-1055601.1646146653	-956698.3523052533	-816942.452575739	-952695.4195687781	-1038466.861161329	-1172842.8503716954	-925923.6211984819	-854089.8280946495	-1099035.59482626	-1185438.0557455292	-1217212.8205250253
71	-592226.815177163	-763365.4785498152	-810420.0731919244	-806275.1979237223	-714609.7860139465	-814478.1157770065	-976487.8029515904	-975073.8718858694	-920676.3328480924	-753230.0258629961	-815696.1840173114	-995559.1907321337	-988676.5356902627	-933191.5127173077	-762390.2331810987	-797732.4433953373	-1000614.2400967812	-1001108.104048234	-955053.4275264153	-791091.1035782577	-676552.7023329099	-822696.244305125	-859736.9526916073	-839548.2664282168	-719266.0410666122	-859069.615072859	-1023676.8612805876	-1026429.567754549	-976123.4398705133	-810880.9668008941	-855848.6857277978	-1037476.474020926	-1034906.8626948457	-983705.836706661	-815773.9517725103	-832507.6745811832	-1035819.2342761902	-1039974.7425563752	-997527.9546752749	-836420.2624093794	-760878.5876266445	-882027.0125150528	-909053.7703065639	-872821.2724359495	-723922.2970421886	-903661.0518363286	-1070865.8670187294	-1077785.253714084	-1031570.5568020787
72	-614451.0890604466	-800509.7656044732	-874888.8481735609	-886479.3479060843	-799571.0327885391	-788431.7840144272	-1000854.8016512035	-1043357.6847535577	-1037886.6672835172	-917100.8652530874	-767223.059473444	-982491.6207885633	-1022149.2107855652	-1017588.1256623741	-897568.2954283538	-731762.0072057847	-943321.8791542663	-980689.2340373585	-976936.311350482	-860868.5795080325	-704720.3231610068	-853926.1823706165	-910581.8746382884	-903428.6863514878	-796065.066228241	-835427.9870512146	-1044745.3206305276	-1086024.858004476	-1079391.4569168207	-955820.3107500505	-813087.0528827991	-1024976.3542593438	-1063432.3271591293	-1057793.500555379	-934981.5873793937	-775503.8738696481	-983686.2033329062	-1019923.7010615058	-1015097.2671430901	-896165.2392746471	-794989.560677077	-907342.5990967343	-946274.8453628799	-920377.9623324696	-792559.0996946265	-882424.1140238012	-1088635.7771098516	-1128692.0448195948	-1120896.2465945971
73	-564732.926010312	-782591.2895920596	-863906.1762010299	-888422.6465113745	-811745.2546826357	-628523.4197342518	-877285.3717911935	-954217.5073000514	-975941.6288223593	-884323.6060917017	-577329.1159398844	-817387.794531782	-893499.1705086003	-918429.2886103314	-830140.3259214992	-552394.2839576296	-771707.9273754937	-840510.8991617096	-860234.7759301645	-772032.2540804608	-673144.7402221034	-843109.3817489062	-905002.9557711821	-908623.6364966471	-814777.2680671422	-694379.719339522	-936216.1078822713	-1008192.4262610843	-1025153.0891770532	-927159.9344648508	-645103.2611583023	-878342.249493411	-949427.6040993282	-969598.3975967295	-874389.3654548202	-617916.8395379576	-831337.4601877867	-895667.6133498074	-911198.6562019638	-815990.9357683668	-781556.5562513577	-903627.4702944305	-946099.6692536154	-928824.5531715562	-817809.2886742933	-760235.9564683954	-995146.7886959936	-1062167.3380230758	-1074364.556707185
74	-636269.451995047	-795674.6002167704	-826540.7526078015	-808410.9270795592	-711028.3921730479	-1002775.9471128257	-1125541.8395373342	-1087543.1996396112	-998385.5492649954	-796878.3077924673	-1033428.908482201	-1185932.7488546977	-1140885.6817859986	-1048900.588730552	-840431.7470568828	-997093.3355091219	-1192556.7741690162	-1162301.0233859292	-1086274.5193116062	-887110.793557529	-701532.9650638594	-845459.1021657359	-870860.1599656368	-838786.9941132076	-707408.0542875329	-1025545.8802264744	-1155223.482137341	-1125569.7665550578	-1044465.5709253373	-848944.6115977976	-1048734.1378306157	-1206895.436701112	-1170428.6132298303	-1086765.402907712	-885455.4666350174	-1007410.0451778788	-1206191.0459903483	-1183326.3185853702	-1114413.9279324163	-922433.197230561	-766796.4748552606	-895243.6084351843	-915179.5059064428	-869162.9986525559	-703787.718026474	-1048315.7507831247	-1184905.0796788752	-1163596.3160289775	-1090545.6100272064
75	-606208.5121515521	-792320.2327670348	-866079.5128229386	-877943.7614767023	-791319.6447379888	-765639.7077623092	-978187.4908228884	-1021123.4371843615	-1015323.573245663	-894347.3450666869	-742755.4109099772	-958084.2770471208	-998118.8649880347	-993258.9127651699	-873112.7876503116	-711578.5297051156	-923249.5582332626	-960984.893385758	-956936.6021009377	-840705.8194940939	-698445.1244674022	-847636.0505048579	-903849.3471559248	-896963.391543038	-789772.4657402129	-815340.360365766	-1024785.3187326893	-1066486.9466071604	-1059528.9734477517	-935768.760341393	-791393.1191682795	-1003345.0977052816	-1042167.8884263973	-1036235.3092073253	-913298.9990203336	-757706.8284948899	-966001.1671820339	-1002594.8574521123	-997480.1314822091	-878387.6024093265	-790681.7398475752	-902951.8682067711	-941619.1250537169	-915982.9591412935	-788225.286766377	-865040.938299711	-1071383.08414249	-1111850.468199471	-1103734.3736897404
76	-576871.8773242452	-752356.7125296207	-813904.1644988608	-822245.1391675614	-735824.9903463952	-694438.9727183993	-889927.6316168474	-924711.7862891953	-903211.7209652389	-766703.7500915055	-673986.1571968112	-877433.4569779382	-907788.4005331154	-886676.9737310896	-749983.4137824995	-664358.165837892	-872492.9056633941	-902742.8456775874	-885089.4064942539	-753176.4695565694	-673634.646537534	-815281.4094706622	-862353.1175639798	-853405.2842721258	-743427.6338474265	-752624.1013073773	-946780.6479436372	-981801.3048817532	-960765.356059706	-823088.1683314579	-730208.3089971166	-931875.2723269733	-962534.1340575197	-942009.6919708328	-804376.1326749034	-715741.2000682135	-921671.6722474234	-952052.9517429965	-934769.3451397769	-801868.9233072584	-770397.4188889052	-878206.10485404	-910802.0073471641	-884565.3660864809	-751030.2779897272	-810809.1673963554	-1003633.6017497409	-1038890.8234743112	-1018318.9911541729
77	-602339.1289647081	-818008.7216167273	-897938.0249682765	-927774.2801873579	-845603.1858051814	-734091.022728639	-980315.398825652	-1054790.4930380546	-1070600.736364129	-982411.2030141505	-691939.1625848728	-930658.8649514572	-1003873.785127131	-1023176.571035084	-937645.1446818463	-648468.8675794277	-867557.6379566272	-933272.9642282183	-948124.9069808074	-863462.9446342785	-701307.8704674962	-869961.6171870634	-931411.9957032637	-938480.2256080665	-839500.1090673392	-787420.0232256314	-1026956.2996556205	-1096697.2641631502	-1108109.3594320256	-1013699.0855058358	-746693.5334924739	-978800.6150882185	-1047220.8585143797	-1062132.7495348458	-969869.2371944073	-702593.1817514687	-915931.0225604852	-977390.4722627493	-988391.3630205785	-896878.7939075356	-800276.6086205872	-921914.5127573995	-964885.8971947816	-949186.1219716386	-833397.0255860279	-840748.9612226239	-1073597.1379415141	-1138604.0487311094	-1145617.982543997
78	-598676.8403638218	-747999.8737433959	-800631.7893239007	-803238.0335358642	-714206.8186332773	-753936.8233381421	-930064.7878265127	-943842.1123027628	-901866.2564175755	-744396.3772967044	-749618.2095747563	-941492.7949216347	-949725.7989839587	-906613.0047011225	-746946.4229145346	-740164.5359448884	-949018.6728143768	-961013.3814802858	-924861.0996084289	-771541.0255318509	-686009.3149268986	-809504.8837286762	-850441.2590154725	-836883.3508428079	-720998.6802513434	-804894.1483694691	-982114.2040534746	-998525.1195566695	-959409.7285817194	-803144.9581401886	-796745.2537378932	-989016.2754536939	-1000006.5697717775	-959925.6594018058	-802046.2072324231	-781840.2763657006	-990022.4655127211	-1004267.1611231001	-970579.6052572526	-819033.5392385323	-773341.7914407759	-871009.8927411367	-900250.6662096247	-870528.6056007236	-727790.5423596902	-855851.4109007961	-1034163.5420140458	-1053208.1268363805	-1016953.204668108
79	-595922.1209642583	-766445.9930264192	-824949.8380387556	-830646.1381477715	-743207.8993583543	-751553.6488719776	-938923.9421531612	-968371.0013258222	-941131.101267571	-798418.3480169079	-738728.9477449358	-936625.6643689891	-961178.8754346201	-933963.9822483857	-790360.9436917851	-722018.0494206756	-928136.9524284356	-953601.951556525	-931015.2179539092	-792723.3557990881	-687030.2291052601	-825360.4184666959	-870069.4972615724	-859156.1769691233	-747257.8001928473	-802977.7907686561	-989796.9345984574	-1020181.2950608807	-994114.5257259158	-850949.6127692547	-787517.1166971347	-984338.4500905197	-1009913.3679067685	-984007.9190092054	-840285.1491821654	-766436.6234160895	-970872.4108641412	-997084.2279950177	-975482.2152629031	-837031.3627680113	-778138.341788158	-884274.8416524917	-915189.0928526577	-887666.1521467677	-751307.7019554799	-854401.8701653347	-1040669.8645138135	-1071991.5887959392	-1047097.9501842606
80	-600113.1909029938	-786264.1371950373	-859565.0781331778	-871631.761976185	-785217.8077189922	-748785.145382869	-961425.1914999167	-1004681.3847592294	-998638.3414252908	-877521.2945967168	-724661.7758927263	-940035.2369747687	-980348.6119508039	-975267.6498419202	-855028.1306490612	-696653.0057288853	-908406.2336795479	-946413.6873672944	-942146.9733111609	-825795.6159374944	-693804.6640435779	-842984.5471168556	-898870.6956646089	-892182.3565269602	-785119.1368253226	-800485.7173187843	-1010025.0532193796	-1052038.8137224072	-1044840.8220508855	-920940.7954193379	-775350.624618761	-987348.9524264048	-1026443.0020615008	-1020293.1950776431	-897264.8942725689	-744546.0524374337	-952923.2210708349	-989780.312943428	-984452.3972530474	-865241.1787930166	-787496.1399887847	-899704.9570058074	-938176.256246856	-912732.8886069502	-785020.4659535642	-852186.2156165495	-1058624.8524388424	-1099396.2538237353	-1091043.302712999
81	-589374.9245926391	-799501.7969383195	-877225.4107296846	-904092.9693180905	-821545.9689453256	-702214.7302645594	-942230.9729429219	-1011417.5979840222	-1022564.3993394787	-927812.3302105158	-660948.1752070942	-895312.0716843746	-962832.6751149829	-977035.5662225763	-884699.9650728034	-626941.2475792213	-844801.6798507855	-905798.3855290138	-916558.7771173308	-825611.794108036	-690331.4700403607	-855252.6482404182	-914969.9633594438	-919824.0759864243	-819566.8307674688	-759348.0245761469	-993363.9299121096	-1058464.9137469572	-1065837.9126550546	-965522.0780924787	-719147.9431299109	-947519.5824765406	-1010911.1400740587	-1021363.7813006687	-923050.1969084239	-683509.1684480177	-896072.3906917047	-953386.8991531839	-960838.4826351961	-863805.024836893	-791288.012776516	-911003.4995425169	-952714.4480303917	-935555.131036702	-817587.6871308008	-816481.2563877343	-1044496.8243456187	-1105512.240391836	-1109111.4260063088
82	-609790.2759655754	-752683.8405406375	-802602.6818130377	-803198.7629230444	-713324.0877037937	-786241.9616638103	-955896.1098330296	-963988.5737662539	-916264.127458625	-752782.3693351072	-787651.1349435824	-975386.7833551508	-977563.1966489515	-928298.2065861499	-762000.7488258984	-775494.8136725558	-983695.3635055479	-990693.1597116616	-949444.6811041697	-789968.6952891004	-693313.4314571437	-812396.5711535095	-851362.4599163119	-836250.5446315556	-718605.2888222573	-833343.2653560813	-1004809.2246412651	-1016219.3907588848	-972042.5623325424	-810452.3679272145	-830340.2123125977	-1019119.9853536778	-1024754.0692678646	-979221.683265101	-815498.5236015434	-812808.078031895	-1020802.2240075758	-1030653.1419912188	-992468.1966449961	-835562.4924056171	-776836.5892362132	-872109.3006256568	-900122.175522612	-869302.2637825765	-723886.4905156221	-880444.5065483522	-1053722.2584618921	-1068450.2077817738	-1027821.0018056686
83	-603983.5383100178	-771990.0620341054	-814723.3206425634	-806845.3085752658	-713653.7702333459	-864742.2604667563	-1016276.225411833	-1005096.3874043346	-941419.9987203784	-764881.480066147	-873817.6668222744	-1046377.4290660066	-1029307.1817693181	-964078.8452871365	-783222.6023986901	-850949.7569225095	-1051851.3002173393	-1044136.8748156636	-990081.5311272192	-816722.559638819	-683220.9232645525	-828772.5521040045	-862706.1770096441	-839345.0527134413	-716100.675013459	-903508.7199724102	-1058791.8614762044	-1052894.0111404746	-994366.6598766911	-821041.660293315	-907337.4479948094	-1082701.1013728837	-1071082.9823515294	-1011216.5143944665	-834374.7063345929	-879196.0405590881	-1081298.214752511	-1078240.9525700985	-1028729.4477053307	-859380.5194148433	-762458.3059792488	-885555.0451265951	-910688.9716168452	-871844.7343555121	-718547.5809037528	-942275.1169391104	-1101307.4469604115	-1100691.6229567789	-1047313.3329528396
84	-544965.2696205424	-799103.2499510581	-829873.5187084139	-811289.1873954315	-714758.60275946	-962154.8341618262	-1072282.174354237	-1034916.4552682193	-956362.1403340071	-769776.3045865082	-986428.5832039872	-1110827.1797203934	-1064879.3817247564	-984581.2879856775	-792583.3264432203	-965106.7495845207	-1117590.6301107493	-1081460.1190403658	-1013980.0287526308	-829884.5322440483	-788069.406651172	-875448.900631978	-879362.9309527504	-843647.4535437904	-714467.0002559703	-992430.6961101263	-1109704.1191947188	-1079843.0223675838	-1007770.4222157337	-825319.6940704612	-1010294.1838321316	-1141238.5721300086	-1103193.2218426594	-1029648.9361637782	-842642.1823379925	-983193.0529017948	-1140651.9968678157	-1111692.6706241562	-1050121.967936966	-871003.7173581144	-1031173.5436719996	-951794.5513128979	-928852.2788298548	-876005.6570696275	-714175.3968115132	-1022706.5255027495	-1147126.0015352007	-1124769.6044636143	-1059178.7040974603
85	-648118.2501682137	-768837.887318248	-809399.8882923642	-803063.3265837326	-710279.7286499847	-897655.7991780629	-1044983.0743833628	-1033469.6130161956	-965919.4500437656	-781703.9466069198	-918818.9425077199	-1092280.2410451702	-1073568.7072584778	-1003086.0479173396	-813920.0504573241	-897341.7403874979	-1103288.201748509	-1093052.6653727836	-1034228.4429526244	-853521.972275666	-718503.8406137982	-822369.4116857043	-854539.4940602132	-834068.124990205	-710350.969614581	-931458.4712226333	-1083079.7248527326	-1077243.3256135567	-1015610.631061115	-835654.1348552599	-946202.376969116	-1122941.544932269	-1110103.1508890486	-1045769.7365717832	-861892.8208501837	-919609.7139892795	-1126955.337394771	-1121653.0119022836	-1067957.4869153383	-892567.4828772123	-788889.4345080955	-875900.9343333659	-899679.0373326241	-865072.8608100034	-710422.2114459173	-965261.0807672036	-1121176.2849495688	-1121017.0382565358	-1065301.8190123844
86	-575367.9451739904	-761211.9766056256	-814469.3304898492	-844475.9227728987	-759669.4554360476	-671713.6038254534	-886760.8888760671	-932018.8548894504	-924571.2160152929	-800565.0545773032	-641075.9057245001	-858299.9884063293	-899405.952192429	-893933.2840921805	-771409.4594000085	-627562.2793489022	-840537.1326102985	-877796.9242079617	-874452.1350380125	-756674.9109143314	-676757.3074434074	-824256.9397912801	-861622.1821796261	-872389.2656557799	-767651.9701566559	-732843.1805707279	-944598.6272694357	-988510.0056870468	-979973.0383176855	-853405.8896561733	-701426.6653737265	-915095.7734436824	-954939.3149781916	-948415.0066896409	-823310.3733405068	-683678.3322020237	-893118.4415139211	-929240.0755096852	-924809.0089248021	-804343.3888194127	-778146.6728968543	-887301.9013639718	-908774.9721758843	-900302.5444466459	-775634.4881031894	-793972.6948160025	-1002436.3031837518	-1045001.1628736513	-1035374.8542101226
87	-614439.2077405849	-799588.4457329685	-838490.4168019505	-883480.053456521	-798043.8239420771	-771528.1743191188	-987917.2881630575	-1031789.7956031546	-1025504.0065562082	-900196.435902523	-747421.5320328706	-965947.6623369411	-1004943.9775052626	-1001368.7917637307	-877631.6746943295	-715153.7969283148	-928446.2307695488	-962199.9652009371	-961975.4537085585	-844080.5580536677	-708206.781649953	-854221.7852114754	-877332.3532159423	-902671.1900592081	-798834.3456554507	-821084.0134706693	-1033977.7927123957	-1076487.9958697478	-1069142.8221327565	-941475.073157767	-795893.9663687537	-1010676.0596279915	-1048446.2864121044	-1043796.9767735736	-917662.4348017477	-760964.5923244497	-970564.8842418523	-1003281.6011921582	-1001893.2137540503	-881453.6341169815	-801974.3617716187	-908855.1215429632	-916174.2287034437	-921862.2610557466	-799624.8736628625	-870639.7901222197	-1080038.2348026042	-1121186.208601806	-1112781.6252029692
88	-612805.3700792087	-830630.4224400828	-912795.5957263515	-905773.2803994025	-865144.8093482354	-745246.233035997	-998470.95566358	-1081747.0687701802	-1103200.6068610759	-1020503.4393173524	-700986.9778933827	-947211.2257312099	-1028617.8305752547	-1051151.0683208546	-973770.1953068443	-653052.218814061	-879115.8171306527	-950380.3797201725	-964108.0563977741	-889648.5580157342	-711343.6521167844	-883239.8069263733	-944402.8561474918	-916479.2265928678	-858616.4961805588	-797566.5440471031	-1043481.3639113852	-1121187.865300123	-1137688.9513589735	-1048345.8638804669	-754805.730071127	-993772.1470167529	-1069557.5638433967	-1087269.2992005441	-1002606.4375604633	-706460.140930782	-926131.2800277505	-992376.05507971	-1001970.2257031174	-920025.7849746154	-809881.9341061285	-935849.1913644323	-976010.0540686323	-927185.10290692	-852088.1830128824	-849886.7925099777	-1088491.6949003644	-1160628.6765406604	-1172177.2664356825
89	-605941.9019017252	-858787.4092347503	-961803.223268427	-1006056.0760133661	-896103.7012801019	-699184.2543893028	-993886.4598528149	-1115577.6124539962	-1186704.436320391	-1141893.2503390282	-628246.8014772789	-904511.1969906827	-1028054.184285229	-1103271.6384389808	-1062736.8408649021	-563026.4052208484	-800404.6133718436	-909373.5050878879	-968367.233972301	-918362.442435097	-712188.4267727449	-908148.6640170848	-988844.2094470692	-1006596.8970421407	-884025.8363988084	-756608.4619805415	-1039564.7410491952	-1151356.775524214	-1212269.3952835293	-1155794.9398417198	-690388.9716047306	-955368.9508577993	-1068782.4537333983	-1133719.3307100101	-1080580.4983937657	-627264.5888761206	-855257.8815759462	-955182.9395736939	-1005153.7242449212	-942674.0958274513	-818434.9434692506	-957509.918745991	-1015885.1412467973	-1007137.6719199433	-871947.9797454572	-814032.60707178	-1085242.9597455754	-1187135.9385410037	-1237834.321655468
90	-608984.8769565092	-701507.8896318455	-831180.9620714821	-834501.08335275	-743529.3855919994	-746880.4847092532	-945235.8974946951	-963738.680029385	-927316.7138860953	-781982.6385365446	-730610.6855095148	-937516.8976433716	-950033.4002475655	-913258.2225005866	-767154.7724935903	-716753.3548247737	-927547.6823823699	-942098.8174932938	-910452.8303968427	-769731.4614001005	-713489.838970371	-847653.4824283218	-889519.252692986	-867395.5708081675	-751123.4090777498	-800249.3919070286	-997106.0138189612	-1017236.035639514	-982564.031953811	-836841.9304105889	-781584.2331051301	-986518.3353308706	-1000818.7005649095	-965996.6515727193	-819777.1579662362	-762819.8907685417	-971267.9102707701	-987364.5566554196	-957427.2562469481	-816535.9525278356	-817994.796601811	-993799.0752074993	-947857.4852257436	-900289.9957751175	-758717.433111303	-853618.2277822967	-1048976.0764657347	-1070733.3912496427	-1037811.3499926948
91	-590154.3494247991	-762180.2338793704	-821605.5804701148	-828102.5988767404	-740972.60340717	-734261.2504213816	-924089.5111196239	-955152.4628818061	-929650.391275897	-788816.2369491355	-719127.0134198382	-918704.2594988287	-945014.0395703529	-919647.0702410577	-778135.9888699326	-704560.5805409189	-911289.8109778329	-938203.5288930614	-917110.4305260362	-780749.8918763099	-682974.4983047193	-822308.8343330856	-867733.2376289683	-857415.0005384684	-746098.15494862	-787732.3911575185	-976773.0531936146	-1008561.1279269056	-984017.5214408183	-842514.1066774052	-770165.9417589711	-968454.3685379562	-995568.5331780881	-971292.2717347065	-829413.1095728906	-751087.7583048549	-955976.0858996757	-983450.2756708385	-963155.7307295165	-826385.3615193076	-775794.6513015083	-882437.4327432923	-913860.8312619968	-886727.3386635161	-751223.7073313548	-841203.4693936555	-1029456.532740467	-1061969.7929720054	-1038384.6516057397
92	-585462.535132361	-771127.0572670274	-820675.5035374182	-854553.1682999091	-769583.9933734772	-697502.0502389024	-912896.0149351986	-957796.0289582207	-950648.5697257862	-826306.1715875338	-668551.7388798622	-886112.2232029336	-926673.1306905218	-921690.7028616708	-798853.4076481182	-650192.7344637967	-863249.6389700621	-899603.5932044248	-897064.9700409528	-779257.34388316	-684882.7051312942	-831998.763520863	-865681.1176828537	-880213.0110359545	-775708.3592751739	-755641.3950945551	-967690.9454260404	-1011240.3112343068	-1003011.2598943615	-876159.7562327088	-725833.5722760414	-939790.2351465719	-979098.1077294004	-973058.2307415323	-847687.506548189	-703646.2844539402	-913127.7791118649	-948369.7066646242	-944724.7574546078	-824265.8652569632	-784302.8790966516	-892870.4677653918	-910686.6703329429	-905872.7892887878	-781832.7291954843	-813780.6774502078	-1022485.8134429771	-1064684.6014693358	-1055373.942077899
93	-546868.4143383295	-813047.9488090798	-837120.3338652682	-812683.5603531103	-713945.420633186	-1032623.5730154248	-1124302.9062943486	-1071951.8771019322	-980942.2302733194	-782959.1975097164	-1067907.842428056	-1176006.5236651825	-1114148.1526335364	-1020869.8018952338	-816262.383719368	-1041679.9905345615	-1183442.3225996983	-1133574.7439180515	-1055248.7977727484	-859311.6135012652	-813801.5297432102	-890187.8457225466	-885468.7725116556	-844199.5446920878	-710831.4248998675	-1055231.662266833	-1155879.2530176055	-1112607.41614361	-1029434.4517235206	-836817.5746353418	-1083044.9231995207	-1199454.1858549067	-1147138.4888823132	-1062000.8663168182	-863768.550523554	-1051057.27016523	-1199281.8388368632	-1158085.3383816846	-1086901.047420868	-897334.2560266164	-1080734.6451365422	-967327.7426360133	-933817.1464580217	-875715.466386707	-707717.4280578769	-1077839.7242994192	-1187455.5372408624	-1153262.9728547484	-1077926.6731737216
94	-590880.6497853667	-801752.8406838462	-886653.1429067833	-817995.616804412	-831948.566309269	-685749.9497358158	-929959.8141004563	-1011350.6498815607	-1037773.7147951762	-931740.9624003742	-642752.6651805621	-884028.9125241837	-964333.462586307	-994886.8181235781	-890404.8102754113	-612161.5889448088	-839777.5162199483	-913028.7411654894	-938258.1239209675	-836815.3537692578	-692719.3295951191	-861788.7465563959	-938462.3643798608	-943671.5562773644	-848170.0195436971	-745251.5124783043	-983262.0101108287	-1059735.3939400895	-1081351.8722445266	-970733.0580281868	-703065.9027967845	-938030.0689687341	-1013285.6574566325	-1038987.4696029591	-929640.7560288545	-670160.6312021099	-891976.9117552813	-960524.5442377978	-981333.0885743994	-874861.111141206	-794558.0148812681	-921824.6579413713	-990271.5288293351	-1069347.4332575225	-864391.4727420963	-804753.007244396	-1036564.1326684075	-1108120.1379986184	-1124930.0187050544
95	-632820.8515139902	-818761.3117522442	-894521.712938209	-905502.1240163367	-817960.4321324567	-839227.1883160432	-1051372.148347412	-1092909.8879897413	-1088171.7519449766	-967810.3418434793	-821752.7165061447	-1036886.8798935728	-1075704.276010471	-1071809.2589976375	-952070.8949829484	-776743.7758045882	-988055.9194047427	-1024603.1775861308	-1021508.5260977442	-905804.1762222329	-718705.5016585118	-867944.641579746	-925586.2758019	-917837.5212505828	-810089.0271154473	-880196.1383885668	-1089229.0418609488	-1129567.8901380037	-1123657.8443703016	-1000508.0609407488	-861435.0893553027	-1073184.7057083903	-1110823.1725883905	-1105839.015734552	-983304.3391033233	-815167.1368907623	-1023099.8377660037	-1058543.5094318306	-1054359.575615216	-935785.2476544171	-804590.1560012145	-917127.9713580502	-956650.7844744913	-930172.8560285599	-802217.6221312362	-921165.0092886257	-1127085.8728744858	-1166225.908958731	-1159143.9368502903
96	-596775.3468726234	-766702.2239077808	-812084.9467456735	-806495.7667284106	-714239.9152574199	-833924.6956345881	-991881.4546203134	-986689.2141772578	-928701.8022441063	-757737.8303032601	-838182.6714286503	-1015220.1426110743	-1004396.0333265691	-945141.4420976706	-770450.0208112885	-818321.5679830508	-1020437.2289778659	-1017755.406654639	-968605.3703305188	-801007.5989294548	-679132.5550620389	-825047.0931175242	-860885.7090898744	-839469.6455393719	-718041.399841519	-876262.5586226336	-1037262.4233093057	-1036668.335664904	-983181.5174902427	-814812.0142429302	-875769.0550760435	-1054973.3265538323	-1048902.9588023876	-994349.379810682	-822970.3551179864	-850570.8295998038	-1053414.4929070314	-1054779.4689368205	-1009599.4288768142	-845303.3036739491	-761489.7612432657	-883391.964974584	-909686.4095976508	-872443.4618538256	-721842.885420981	-918600.3590757541	-1082643.3401853545	-1086647.4464654939	-1037661.2434234356
97	-605489.2177659313	-820402.4248674598	-901280.4384581902	-896240.4940435374	-851557.3218598973	-728615.7764702893	-978151.7581889274	-1058021.1658550224	-1076667.9352171319	-990249.1947256273	-684985.8956464981	-928380.4160544568	-1006238.5872934068	-1025976.4053725749	-944508.0876399509	-642095.7603634668	-866908.6675247966	-935348.2370608151	-947179.4480101842	-868695.2367547345	-705039.8654849681	-874808.2607132922	-935150.4224477612	-909404.3011294322	-847085.6943531026	-782890.7961726696	-1025511.2052660253	-1100206.0321832686	-1114257.3724418238	-1021553.6628827623	-740577.00763476	-977077.2428698268	-1049716.805730797	-1064986.590822962	-976656.362911371	-696765.6287488354	-915467.7720327068	-979239.3262167483	-987228.5668771208	-901692.264386802	-804590.5131602675	-929214.0965153871	-969020.3439373322	-922568.0390235098	-842614.066846308	-837165.7533313124	-1072870.576459489	-1142390.9118514115	-1151846.7829867224
98	-566856.4167140947	-766393.6811368632	-840474.8728039404	-845902.7997219685	-779808.8564843686	-640798.9716262718	-870856.6281864223	-932736.9935404261	-936562.6748148915	-830492.2402176473	-600492.4897429458	-828944.6890854129	-888065.42517522	-893042.0836714124	-789990.0930103272	-584240.3930296906	-802449.0496902707	-855971.2979438072	-857788.2582265424	-758051.6283401916	-671752.8418703532	-830285.643706237	-886293.1249146981	-872045.2938012976	-786197.5179055141	-705395.7928372459	-930620.1294533721	-989411.8674643058	-990527.3723167808	-880077.9627382057	-665442.5134952145	-888920.1238173469	-944948.0655433316	-947323.1794031442	-839627.4946934014	-645573.9443247634	-859159.3239240524	-909871.083060618	-909385.5220343791	-804882.46285173	-776649.2670066052	-894177.6062556044	-932111.3145254559	-898187.7223196465	-792586.1793266595	-769992.5515282133	-990383.5620983614	-1046086.7474901393	-1044492.0576147622
99	-611950.5263340672	-777834.5437451474	-817639.4325996405	-807231.6462207052	-713005.9225134688	-898803.9487668942	-1043239.0008088917	-1025441.2589203628	-955477.0225791391	-772777.1322006991	-913203.9100989493	-1080814.601025753	-1056840.6931962066	-985009.763358259	-797339.7364158473	-887012.6712866507	-1086572.2883494175	-1073295.484533679	-1013818.4583933629	-834091.8130579775	-687739.6684713396	-832890.1851312575	-864718.2831309839	-839207.3441688372	-713955.6527013548	-933623.0479644336	-1082587.6745494206	-1070827.7415801743	-1006729.2471101308	-827927.0927778082	-942229.0030411344	-1113347.7416342548	-1095597.8670523474	-1029859.2294771858	-846979.5782159646	-910834.5888522707	-1112117.2183733643	-1104172.1949290447	-1049873.2578039318	-874939.624662498	-763528.8081127385	-887945.8298075801	-911797.0719870508	-871182.9796213097	-714905.3841263261	-968442.0846185666	-1121936.2990723378	-1116214.2109575977	-1057981.4849235108
100	-609469.5325330312	-701382.3189213526	-831453.2610863512	-834702.4483562068	-743686.4530802588	-748049.1123587929	-946305.3786337229	-964625.1163802228	-928023.0847626452	-782541.7512739822	-731917.0895919446	-938765.2396976673	-951081.855951648	-914116.5254336693	-767851.8088370224	-717929.5894643427	-928711.9358272554	-943091.8142726063	-911283.4893855553	-770412.4511906609	-713942.7138270971	-848009.7025276187	-889807.4286233917	-867569.7521542928	-751228.8926034569	-801288.7113450782	-998056.432177278	-1018022.5968072054	-983189.153840472	-837335.2626939054	-782748.7626280772	-987633.7830129468	-1001754.2747029114	-966761.4151316846	-820397.8978840562	-763860.620168527	-972303.2955391069	-988246.7874396304	-958164.754184434	-817141.1019695962	-818415.8907103068	-994637.0861164735	-948161.5381003069	-900436.9934639863	-758771.3326780119	-854528.2389516137	-1049807.4321005826	-1071420.0772341876	-1038355.2228892801
101	-611985.2087128707	-798059.754121065	-872253.4142362853	-883925.8097269578	-797102.5164666448	-781613.2206535079	-994073.5635843048	-1036706.0035220664	-1031136.6071041075	-910293.8364699807	-759903.2255900695	-975189.8279228387	-1014960.2020444226	-1010309.7067142334	-890252.0936280661	-725723.842070688	-937316.9680401306	-974794.4092863405	-970953.1230174178	-854836.6122942831	-702843.0110889779	-852044.4028345714	-908567.7463636271	-901494.5044098869	-794182.5481698615	-829418.4970069497	-1038774.0112983277	-1080179.8228559012	-1073449.321565002	-949821.6134206048	-806597.0139787614	-1018505.0660906553	-1057070.7775912154	-1051344.0708488657	-928494.9425946192	-770179.6427560535	-978395.4813205284	-1014739.53895117	-1009826.8584969947	-890846.8144838235	-793700.8167755329	-906029.0515092836	-944882.0225428967	-919063.1366272997	-791262.5798989411	-877223.6977134314	-1083474.3965123508	-1123653.6553366962	-1115762.036069001
102	-579476.5214230161	-784036.6162210389	-860338.1129664175	-862346.5199764613	-803246.7931881724	-669485.9226668496	-905906.5271976816	-973663.3392863447	-982330.5976267662	-882679.7451092515	-628093.7922807935	-861427.1716388594	-926668.8305486691	-936467.4893785235	-840466.1966980172	-603139.8974364686	-823505.9522295728	-881901.2138664502	-886989.5106444276	-794195.3685181522	-682626.6514836173	-844829.7635537811	-902253.2467250443	-884249.2907020091	-806087.744381011	-730710.9403254905	-961618.0193317439	-1025604.7895880388	-1030946.0195465722	-926293.5645320442	-689986.5578688188	-917718.2446625413	-979172.6735290042	-985760.0654713991	-884390.4582366197	-662296.6359253803	-877553.4991269995	-932531.4770333369	-934814.3635894741	-836507.139265516	-785776.7815164598	-905622.9108587647	-944168.3179836712	-906151.9946804981	-808928.6955738496	-791935.895456373	-1017329.4404716885	-1077546.248356092	-1079561.42453366
103	-541020.4021035284	-770198.4646000426	-814852.2092688872	-808398.9097744283	-716444.179124396	-816086.1530623909	-964452.804509748	-958148.8657069735	-905412.1534724571	-742450.6022439612	-817537.1268584339	-975722.4373931417	-962754.3188513172	-909361.9006082527	-743501.0138848727	-806384.5630512995	-981092.2334243837	-973436.1264769359	-928437.4923111971	-768887.627548796	-734731.4678276731	-844897.7895265406	-866706.6490606577	-842503.0705565197	-722002.8765316448	-862255.891686023	-1013991.5946508718	-1011928.4851735886	-962864.8900750787	-801486.7111496214	-859495.3371196843	-1020568.3564496012	-1012102.7993167149	-962589.3598842423	-798851.1228201386	-842523.0640417729	-1019123.162539177	-1015529.2384091291	-973885.7287242002	-816425.3735631997	-928442.533545637	-919597.1144530385	-918561.0251750068	-876607.1687613523	-727561.5733455475	-908425.5866916624	-1063530.3222919956	-1065708.114096659	-1020317.6266777003
104	-541046.2968804952	-770388.2004952808	-814950.8116822782	-808417.8820451181	-716433.1147163158	-817044.972567124	-965160.6147139053	-958652.7811366785	-905746.5977955046	-742629.9727715059	-818645.7589163674	-976609.2877511395	-963424.6850206295	-909855.6533772151	-743823.1984782032	-807426.4423038296	-981988.2319650879	-974145.2142175068	-928999.0079749727	-769288.0215381848	-735081.5870709037	-845098.3321822191	-866789.7270335963	-842510.5824798206	-721953.4097663945	-863110.3810985868	-1014619.8678350283	-1012374.2876716079	-963159.6575759749	-801643.1548766989	-860485.2062307823	-1021360.456135611	-1012700.7322422048	-963029.5502743518	-799138.5747344203	-843446.4456184009	-1019920.898343079	-1016160.4714274314	-974386.1562804327	-816783.6350342605	-929116.8772551077	-919808.4638691576	-918628.5787029648	-876603.2203369673	-727473.7042208452	-909175.7460846722	-1064079.0584561515	-1066095.8036993598	-1020572.7173564452
105	-577307.3522676791	-781004.1128086739	-856923.9790206794	-859520.1400376465	-799218.2331615117	-664555.1514257919	-899882.0795733164	-966628.8360963713	-974463.9143656373	-873709.6510794576	-623349.6245030174	-855844.0167547402	-920033.5990542852	-929003.4427013772	-831790.2617730454	-599891.4123441572	-819886.6491771264	-877444.3274049521	-881970.3402410862	-787982.9092588305	-680757.6390658815	-842329.890779943	-899509.9886661827	-882151.6429994398	-802668.971973139	-726359.7215075127	-956290.039243182	-1019383.8768362754	-1023998.780605731	-918349.9333008655	-685767.877815807	-912768.3653303274	-973290.0785974786	-979153.4556524232	-876696.5094098096	-659422.3058266268	-874391.8710416246	-928636.562625958	-930443.6028050353	-831071.4258378923	-784207.9258376578	-903655.668724786	-942095.9358116862	-904783.07941804	-806119.7107847662	-788164.2290628075	-1012697.9283266613	-1072138.92563614	-1073533.630725904
106	-565928.1858790689	-766087.4134341157	-843691.0887580921	-811589.2327496212	-782290.5383197598	-633288.7772462429	-864018.6428261251	-930120.5664823675	-941071.2290223718	-827717.21064617	-592713.2101503302	-822781.1116871082	-886780.7808111446	-900570.4134361395	-788696.1286334643	-578345.7895138562	-799359.1581401281	-858366.9072909716	-869551.2624728802	-760961.0888056122	-671102.1003984691	-831349.5265336396	-897300.0999579112	-898204.5620324817	-798213.4914443454	-698873.543657326	-924780.3260647288	-987546.4982983291	-995315.6531165361	-878175.3480391392	-658549.5965113045	-883608.6873039757	-944212.057889865	-954835.9692756679	-839018.9482001121	-640291.9664847965	-856577.2642056963	-912406.554546487	-920676.2717900503	-808022.34530684	-776276.0179796916	-896611.6427151293	-950909.0517195524	-984819.828819371	-814136.4445487875	-764458.244506587	-985541.9406796881	-1044972.4301142907	-1049560.0710669125
107	-606410.7641981697	-702174.8233959691	-829734.7218914186	-833431.589366525	-742695.1654880029	-740673.6452790431	-939555.6470691653	-959030.6208824713	-923565.0222239578	-779013.0673595939	-723672.0850290215	-930886.6774119365	-944464.8205485557	-908699.5861460381	-763452.6585975104	-710506.1129912175	-921364.0753187172	-936824.7923867203	-906041.0171334558	-766114.5742887219	-711084.5206307061	-845761.5188426409	-887988.6867095579	-866470.4552270294	-750563.1627864237	-794729.3369338211	-992058.1321058087	-1013058.4356385026	-979243.8716133091	-834221.7337470143	-775399.1597299464	-980593.946447744	-995849.6597828243	-961934.8234836417	-816480.2712296024	-757292.3471762328	-965768.7505414047	-982678.8342012733	-953510.2418926425	-813321.8702512705	-815758.2728318401	-989348.2142726098	-946242.5932869377	-899509.2585986692	-758431.1606137699	-848784.9575701179	-1044560.5631609334	-1067086.2503945339	-1034922.7209748223
108	-619154.6265744471	-842013.5227415744	-924803.7627509111	-958490.6292118761	-876807.1117071395	-775436.847304801	-1029713.6151773685	-1111048.231050877	-1132907.291185103	-1053229.8347461526	-732136.6833287795	-976506.1765670573	-1057107.0316499313	-1083024.744811741	-1006318.818407724	-676391.7259568193	-897073.738455669	-968909.4521441619	-989068.4285448147	-912558.5862126539	-715545.0446008886	-889040.1988775005	-952738.4842128421	-962678.5821262301	-865354.9925592942	-823831.4074219507	-1070527.9988448496	-1146287.3491839713	-1162938.4404799764	-1076188.0998528383	-782422.1285999736	-1019374.3451849999	-1094317.1527504507	-1115013.0087638916	-1030596.8713341015	-727346.5079779354	-941689.0843079237	-1008524.8183949891	-1024129.4138075613	-939777.8310401705	-811935.458449932	-936066.8750134265	-980673.1347650109	-966866.4893051429	-853902.8650016866	-872225.9050391007	-1111342.319957365	-1181526.4840816243	-1192969.5898298156
109	-560077.3501046242	-773152.0158443293	-852484.5756167513	-875431.609444317	-797612.4288601619	-619079.7489533318	-862470.555485227	-934782.0523301873	-951858.6342078166	-855497.2843797753	-569978.7645658561	-806336.397183005	-877434.1783816677	-897410.2433835197	-804081.3984498329	-549805.6348022047	-768098.935173632	-832642.2443143785	-848336.9509881202	-755630.993630197	-668640.7581156176	-835408.9051215665	-895843.6210824221	-898214.2587141163	-802557.7537404039	-686074.076378096	-923127.680739553	-991037.7852366167	-1003907.9162152725	-901722.3807781377	-638527.5540643773	-868595.1107967335	-935236.5319176883	-951023.8401119772	-851408.9707164374	-615546.6753536105	-828332.8704582909	-888897.0126508529	-900886.3942340908	-801812.2274891529	-777204.1676661603	-897665.7913396994	-939202.6010089826	-920996.8363265964	-807503.0847388547	-753068.3413228544	-983784.7496120877	-1047293.5120448315	-1055957.204300949
110	-586343.9326269182	-759049.8702710874	-808266.7946762465	-805989.9233650061	-715088.1615349058	-789326.7146291847	-956578.2913004223	-960051.0691318894	-910296.5230482721	-747399.8182581966	-786613.0923153261	-970130.5296885588	-968345.5883571851	-917735.9688769612	-751966.0375982376	-771103.32220382	-974976.0071042279	-979577.1721851879	-937525.9058596448	-778265.519111217	-673216.0276390652	-819655.7537946313	-858251.198733557	-839649.9514303312	-720849.9413174563	-836832.9738074467	-1006105.8579007986	-1013187.1693040892	-966994.8145365798	-805796.7128153677	-830084.5048713287	-1014846.7694609319	-1016804.8915368165	-969939.9187815614	-806466.4216726591	-809145.5378355028	-1013062.2553439065	-1020826.9224869686	-981915.2097961218	-824931.3046649283	-760088.1209782579	-880261.6395235654	-908235.5408436698	-873309.9169985659	-726611.7219292102	-884339.1704566136	-1055633.3709042007	-1066323.260573263	-1023693.1149279133
111	-626416.2820085408	-812397.9580517848	-887676.766124429	-898869.8830119782	-811549.0162766753	-821517.503815232	-1033759.4079015309	-1075633.642280147	-1070639.9890484128	-950130.6158138441	-802741.0945835714	-1017922.1154560358	-1057032.4429658568	-1052905.2030530844	-933068.7065791597	-761061.0001455317	-972459.5135846727	-1009292.6963304386	-1005968.5403149888	-890137.4982696595	-713829.6058509364	-863057.1425393401	-920355.0306846579	-912813.9187496153	-805199.609929408	-864587.8398275125	-1073719.9091107694	-1114386.726174536	-1108224.484471503	-984927.7940286265	-844578.6732299856	-1056376.990400183	-1094300.4786101042	-1089088.0728648044	-966456.7384392883	-801338.6442537959	-1009358.3774816082	-1045078.8145224431	-1040670.8747302669	-921971.8356347217	-801242.9336186372	-913716.3269808958	-953033.2405137196	-926757.892028141	-798850.203612807	-907658.0977510165	-1113680.3478200077	-1153139.8256577016	-1145808.979945704
112	-574263.6258053248	-760580.9237363402	-831938.1005350214	-844863.2890226603	-759340.6099789673	-677306.860702941	-890338.183963069	-934952.5079419048	-927878.1684135027	-806163.9256864184	-647928.724891925	-863491.3080701096	-904986.9871969649	-898968.7472641728	-778333.1543943787	-633355.553813346	-845457.3801785398	-884618.8576665776	-879425.8374461527	-762563.1361814891	-674124.9984579164	-823258.0495743952	-877756.8001740606	-871906.5300622651	-765384.8974306767	-737488.8633734056	-947428.4436747353	-990765.9232028894	-982550.0402832283	-858057.0803716241	-707316.2273694174	-919511.1171694199	-959755.545048634	-952684.4997874384	-829266.0772195342	-688732.6960021969	-897461.137029702	-935435.285180936	-929203.2561004793	-809488.6894305048	-773986.3728137717	-885935.17539249	-923575.4406841424	-898949.7086196123	-771429.1848956929	-797670.7967796074	-1004518.6408864015	-1046579.3452281369	-1037221.9121751316
113	-629155.1277028855	-821492.9025681827	-768500.6311888373	-896225.7992077706	-809726.1802901672	-782699.5070602002	-1010557.2549464477	-1071269.2594376358	-1048224.4374119339	-911655.2654136929	-758422.6514306482	-989976.6516710207	-1049805.5894240707	-1025505.7886105457	-888669.9606073056	-725224.0197625295	-952426.3525580302	-1007535.0427734535	-986282.7684063382	-854423.1121483298	-723298.9255406491	-890930.2671043575	-943167.8631989644	-934848.0739031191	-813551.2129204567	-831535.1081898296	-1055029.6289082735	-1113082.294502135	-1090269.1802611814	-952194.1931179818	-806093.2996847574	-1032915.3339252202	-1090020.0699987137	-1066137.2810033746	-927896.6560995227	-770114.3716934118	-992567.5883362083	-1045121.8720916028	-1024198.6303212736	-890853.7177370798	-817442.716284548	-960367.6315938621	-1117835.0256478959	-973470.2789579326	-817376.2525979406	-880370.6468194589	-1099501.9403234294	-1154895.3295199638	-1132313.9088760295
114	-582786.205000755	-756439.9662545114	-806964.5795807348	-805817.4009374516	-715377.4635551418	-774116.1721891365	-944537.8300095829	-950965.8902380816	-904019.2370811058	-743873.9462924204	-769024.8236530385	-954752.3117625014	-956050.2599403448	-908389.0858092569	-745661.9089183052	-754999.114901642	-959471.0486039398	-966556.1420265954	-926925.9750401101	-770509.1282959387	-671198.1427609593	-817816.9890404685	-857352.6752874248	-839711.4463757257	-721807.8196417958	-823385.1593614919	-995479.6311132044	-1005178.7063777129	-961474.1939459008	-802721.9631992999	-814503.3782355931	-1001161.246352596	-1005857.5570750315	-961614.8526114773	-800837.6067703104	-795017.069589464	-999299.7618819166	-1009247.1012241943	-972473.2579464306	-817983.251221034	-759610.0789625442	-879194.0138810927	-907740.7090091369	-873605.4293167103	-728238.176500983	-872654.0840067408	-1046421.3780113921	-1059391.514222778	-1018929.1591052619
115	-598072.4757806876	-810033.8027046632	-889606.9594598837	-886576.6415464275	-837783.0202032954	-711756.6679986396	-957553.1923631154	-1033969.0558450494	-1049770.4662558592	-959578.9849641307	-668764.8147520461	-909290.7018487748	-983551.6521204964	-1000455.6163488127	-914843.6556794652	-630988.6617246609	-854533.681996188	-920109.4176902156	-930018.0884315807	-847453.8285838405	-698649.4081822461	-866260.7892937055	-925770.7771713857	-902232.1026184876	-835396.3556986825	-768013.2716537191	-1007293.9751702752	-1078935.7201474274	-1090503.633086236	-994393.0963024108	-726152.6547001358	-960152.8007280999	-1029603.257322882	-1042397.5178113154	-950349.5010625763	-686937.8268596088	-904657.6516210128	-965921.9806593206	-972284.2251978905	-883106.6764905254	-799226.3405446232	-922487.7758435662	-961934.5323828878	-917887.4951957802	-833009.6911940697	-824269.812769617	-1057034.6834879	-1123902.3964001588	-1131236.776015906
116	-582054.2244033172	-812806.9102311609	-904266.5168004166	-938518.242276863	-837169.5310910358	-655039.4736072499	-922716.6902719631	-1019412.8520103553	-1063937.9664671991	-993181.628015793	-595247.5403574773	-851373.2066755323	-948173.5390933828	-995826.1311331124	-928383.8382697629	-553838.35270851	-782969.8683399586	-869261.9524998215	-906380.1023426956	-833823.1826460056	-689353.089544871	-869678.3488273444	-940925.3487874834	-951241.5676396467	-834300.1450930546	-717755.754084942	-976576.7226707897	-1066230.4422651376	-1103572.827089245	-1024117.2702866129	-660956.0792346705	-908440.3720812877	-998054.5071531094	-1038511.0643675926	-961741.9118242961	-618981.0360995186	-840733.085626905	-920581.4089681685	-951349.670109491	-869530.0569292281	-796651.9492370579	-926549.787387911	-977584.1236883004	-963964.8414011641	-831430.764580057	-780471.9720626342	-1030436.6925696161	-1113048.032484303	-1143207.6659850571
117	-544960.2007431397	-799066.1093341259	-829854.2173819055	-811285.4735918987	-714760.768606579	-961967.1461764416	-1072143.6211952772	-1034817.8143130252	-956296.6731830926	-769741.1929802194	-986211.56955704	-1110653.5796254762	-1064748.1581991948	-984484.6363614383	-792520.2591224725	-964902.8027342991	-1117415.2392679658	-1081321.3158048957	-1013870.1126076465	-829806.1555100984	-788000.871149879	-875409.6446022016	-879346.6685203596	-843645.9830921113	-714476.6833271505	-992263.4306387994	-1109581.1353300568	-1079755.7569622395	-1007712.7217641607	-825289.0703630624	-1010100.4179165037	-1141083.5193869667	-1103076.1770541186	-1029562.769323098	-842585.9139053832	-983012.3018563654	-1140495.8408601787	-1111569.107374839	-1050024.0097296115	-870933.5880236439	-1031041.5415468211	-951753.1798702773	-928839.055292468	-876006.4299698601	-714192.5971072013	-1022559.6825312659	-1147018.586964836	-1124693.7146010008	-1059128.7703452287
118	-538845.7744538324	-754264.5593011335	-806571.638450996	-806805.629999424	-717373.3613980857	-735565.0731266362	-905011.3332558277	-915830.3538329031	-877325.7222544486	-727387.1742314427	-724434.8796518021	-901245.2827098151	-906457.3749124706	-867896.8428138784	-716444.1473259695	-718888.1759187353	-905846.8199109754	-913887.3684905608	-881281.7477473166	-735262.7833875996	-705328.666328482	-828056.3390463215	-859729.8113275308	-841872.2237979842	-726157.0654475185	-790496.389554837	-961229.5940519784	-974490.2620237897	-938110.4942946868	-788348.6619221485	-776366.7300907304	-954048.305679427	-961888.7552219359	-925622.4381497569	-774711.085562541	-764978.0397949337	-952129.7940099309	-962518.672735495	-931860.1263469624	-786338.7927137447	-871811.558198947	-901848.1187915094	-912887.9209069056	-876938.7550442372	-734940.769095233	-845427.6562668893	-1017447.7923481293	-1033150.1766170635	-998895.2663349251
119	-613250.9893812942	-700402.5711455365	-833577.8357831731	-836273.570423523	-744911.9500267295	-757167.1649357039	-954649.8545320225	-971541.4111095218	-933534.4439998812	-786904.1496293396	-742110.1233739022	-948505.2526859972	-959262.2838562526	-920813.3131349075	-773290.3366948351	-727106.9945091379	-937795.8592886738	-950839.5317308067	-917764.5891058543	-775725.7780806377	-717476.2060870267	-850789.0596612794	-892055.8807166427	-868928.7775654353	-752051.9129502483	-809397.8548212519	-1005471.9375049216	-1024159.6294923307	-988066.5792820137	-841184.4183243919	-791834.8401496717	-996336.9063867356	-1009053.9600930865	-972728.3750459885	-825241.1336311311	-771980.7646740429	-980381.7432104186	-995130.2688278822	-963918.9779288472	-821862.6952239019	-821701.4181600503	-1001175.5481587353	-950533.8678132996	-901583.9222195388	-759191.8764528559	-861628.4728804253	-1056293.9673041953	-1076777.8478751397	-1042598.7145336678
120	-585950.2979394688	-759070.9791255158	-819167.9958843549	-826248.6471421376	-739343.3261031994	-721657.0526139962	-913276.8928676847	-945517.6471129638	-921282.2554087007	-781817.386696381	-704839.4258219253	-905641.5873301827	-933231.7070420323	-909211.6646813927	-769225.3829062084	-691836.0651068472	-899010.1550388918	-926979.8246899392	-906975.4170568946	-772022.5942632315	-680018.3304018361	-820084.575497286	-866030.3692488023	-856145.880340236	-745252.9050495737	-776620.2234093372	-967280.1203355409	-1000091.3436150337	-976657.9501450853	-836365.579178988	-757518.9025564004	-956876.6740701161	-985112.7751205178	-962024.0066091594	-821488.6254016215	-739900.1759383262	-945118.3539898061	-973512.6702842076	-954171.1211178219	-818625.6336839993	-774086.3666712751	-881098.1699793232	-912892.6791646187	-886043.0500796651	-751162.4847739259	-831583.3317046784	-1021283.2852783009	-1054665.0401171036	-1032033.64488147
121	-598100.0297046608	-839699.679884665	-947890.8302375372	-1008574.6929288111	-813618.867699612	-675010.5612198584	-961225.4848551716	-1079698.357806013	-1158484.4011535463	-1136339.1342289192	-606888.1869582516	-880194.9593927794	-1000012.6419905414	-1084349.8003990913	-1073474.481024865	-550355.0289204618	-792486.4091725111	-899303.7804399903	-970497.9344800015	-953906.197321048	-703891.4981857352	-894393.9815510842	-981452.9315350114	-1030185.7540402823	-970264.1553936845	-735345.0518848546	-1010923.2861838664	-1120235.675114932	-1188731.1614486414	-1153660.1068671094	-671111.2924156792	-934046.8190508529	-1044437.7410437902	-1118260.2283361158	-1093345.4992053215	-615441.082946976	-848683.811985504	-946919.3777925927	-1008532.2460667067	-977931.9304537983	-809682.9666668096	-949088.2831667854	-1015014.9935106868	-1051796.7526517534	-1126909.443087757	-795679.4723406897	-1060621.024961843	-1160773.0078421729	-1218977.921743737
122	-539125.2534677106	-756312.3545366953	-807635.8416799288	-807010.3952889725	-717253.944657661	-745913.4893348092	-912650.6382061898	-921269.0485763517	-880935.3370320705	-729323.0973800117	-736400.2035741733	-910816.9451276376	-913692.5511867108	-873225.8532605155	-719921.4444097137	-730133.0453551817	-915517.2174939949	-921540.4617279398	-887342.1144456108	-739584.1844740312	-709107.4585136177	-830220.7702643044	-860626.4612574235	-841953.2990248206	-725623.1769807575	-799718.7844300335	-968010.4661243459	-979301.7513326476	-941291.8822085316	-790037.1390473665	-787050.260726778	-962597.3362203463	-968342.1687653575	-930373.3566961628	-777813.5172862802	-774943.9789802928	-960739.654449971	-969331.4899190096	-937261.1769183883	-790205.462921837	-879089.6635550838	-904129.1859919134	-913617.0174888878	-876896.1402051548	-733992.4088775079	-853524.0305928327	-1023370.231542502	-1037334.4608838338	-1001648.4273849927
123	-643623.6369945512	-801725.3339195553	-852608.0340904838	-851682.1099231269	-761694.5895676308	-894567.91638415	-1061609.9474682915	-1077693.0018888672	-1036080.6442514329	-877831.211700988	-900843.8959595889	-1084842.038032685	-1094867.8004953875	-1052369.921691312	-891465.6553494302	-866397.507920193	-1067468.786651169	-1080952.3676569688	-1046012.7409748505	-891748.1485362991	-720572.5610913648	-850598.1014212555	-889391.1929204884	-873556.3235162324	-756848.4776024015	-929062.6519604849	-1097509.0524171859	-1116284.198066633	-1077620.3318190377	-920714.239594561	-931017.486605133	-1115705.4374308551	-1128550.2381573883	-1089170.8312623021	-930200.7722535366	-893377.1809852272	-1094070.3009372149	-1109841.848663372	-1077426.613639962	-925077.5684384888	-797521.4932452025	-899470.8649236552	-926174.2872428761	-895430.4725804762	-752002.3672836307	-963557.3250368199	-1133408.0948129685	-1154875.3942443987	-1119160.0193866426
124	-576386.7357576813	-781036.1836731615	-861698.1596385085	-814274.3979273039	-803104.1527408484	-655277.2987498932	-891657.1570592888	-964167.2595089383	-981603.0087551709	-871317.6182198346	-613686.6955062263	-848452.451496088	-919286.1315296754	-940102.093614064	-831326.2001179777	-592519.3086645845	-816300.0668847242	-881277.8117282998	-898348.9852210683	-792754.566860801	-680162.7234551564	-844107.7896883137	-914552.8088362893	-917261.5509104687	-819152.2188923191	-718312.3574756484	-949292.2785467847	-1017803.6772521376	-1031376.7848947975	-916969.8907426465	-677208.1150226076	-906418.8088511399	-973163.4948732889	-990107.1419677929	-877002.078877148	-652811.0876796669	-871414.6358164891	-932574.6789102745	-946099.9071552479	-836037.076394265	-783938.7152264961	-907179.3998041322	-967407.3996079346	-1020248.6413989938	-835200.2850169882	-781347.3496275392	-1006927.3293865516	-1071440.0949953368	-1081150.5528598933
125	-651966.8830858251	-807895.8762315116	-857445.598078046	-855361.4120480202	-764928.0089359207	-919581.8641098283	-1083068.3751972853	-1096813.9948843236	-1052687.8188088469	-891720.939316947	-929198.6532207637	-1110765.861490353	-1118250.6967696177	-1073079.7433836341	-909149.4012876377	-891650.2347312522	-1091838.6574227943	-1103226.6253698135	-1066126.412704725	-909068.1057137457	-726439.2914078094	-855012.3049348235	-892770.6591345321	-876074.984900425	-758525.9375338451	-951115.557462262	-1116348.4684517465	-1133093.1013592167	-1092225.9365935836	-932916.439828612	-956116.4561970211	-1138682.2145830458	-1149300.4508628056	-1107564.3778331373	-945927.4877369244	-915579.7522848536	-1115618.260003183	-1129563.7496885965	-1095257.2252026328	-940477.312984243	-800911.7084016318	-902128.7293336568	-928095.6555302042	-896788.4930691499	-752123.8679038658	-982649.1883146956	-1149628.499149043	-1169372.2078341097	-1131764.0543783202
126	-676259.77204834	-780698.6618648302	-814390.5964850382	-802963.8852543798	-708044.471016206	-979459.1037195362	-1110393.334494492	-1084484.6282102817	-1002377.8430599628	-802939.0162012436	-1015126.1907598402	-1178106.843302715	-1144058.766637736	-1057997.4727179804	-852040.7232363478	-986805.3247670408	-1191096.7683147278	-1168208.0141259425	-1096479.1655325163	-900184.6506999289	-736999.3772342158	-829691.7634635462	-856872.1656332482	-832465.7285326208	-704290.4065553317	-1003497.53068528	-1140548.2198643424	-1122048.8869209406	-1047599.5839057859	-854158.0106842781	-1031271.7736589037	-1199170.3765178588	-1172768.9478130585	-1094631.267533701	-895956.8734983358	-998026.6049848153	-1204896.0641139941	-1188467.783187915	-1123383.9360834188	-934422.2174413563	-797738.9867214003	-878684.8629172975	-899353.6722871476	-861967.5092027602	-700536.3431754741	-1027535.8951510238	-1170703.0079709725	-1159613.1456884951	-1092821.3333997424
127	-640535.2236416086	-833564.3361691997	-766016.0750621742	-907353.03886764	-820570.8844594936	-808602.3700931681	-1038166.063701004	-1100557.1443382222	-1075787.871827539	-937547.5357462105	-785912.2854834726	-1019349.4831890783	-1081158.28875578	-1054839.3656327766	-916133.6835495997	-747986.8974000311	-976935.9714823783	-1033743.553027656	-1010736.7021937516	-877172.9180579069	-732848.550882688	-902707.5798822411	-954931.3174760122	-946159.8178877707	-822990.0924467614	-854503.4602828538	-1079549.7397336536	-1139122.0254655373	-1114746.7050146	-975152.4565188447	-830563.6863277799	-1059103.8837727762	-1118017.7196730142	-1092289.1476500158	-952342.8691777354	-790230.8751996644	-1014265.308526044	-1068361.351162842	-1045843.5219865848	-910956.9325321332	-825161.8701789441	-971850.823543014	-1143846.489481615	-984966.5264108095	-825409.308326584	-900404.4879725394	-1120933.3532140348	-1177686.9065405838	-1153705.5222597455
128	-576487.6634541191	-781180.4431510351	-861871.932504216	-814300.3104619368	-803305.0094736121	-655489.4936382088	-891923.8758307144	-964495.818854008	-981994.1508550255	-871738.3733676545	-613889.0950346324	-848700.1865283308	-919599.8165250142	-940483.5844959721	-831737.5912729511	-592656.0867700488	-816463.5510115868	-881498.9078491774	-898626.890652831	-793061.3821018332	-680250.1607981932	-844230.9102093892	-914719.301914643	-917445.4557549088	-819354.2829979734	-718499.9470289743	-949528.8251931095	-1018095.6668116804	-1031724.7840919674	-917344.2680583228	-677388.1745255161	-906638.9323912043	-973442.8836869594	-990447.5178565911	-877368.6258580605	-652931.900419319	-871557.8202689466	-932769.3064979548	-946345.2517758947	-836307.4257551032	-784012.6622258981	-907281.3813782401	-967566.612908701	-1020590.5385532541	-835403.5564954687	-781510.3338361089	-1007133.7038882427	-1071695.5147693527	-1081455.4091347815
129	-646182.3907342792	-839554.5670916878	-764783.1589537394	-912874.7305983446	-825952.3730554183	-821456.1980848978	-1051866.4364488334	-1115090.7283005267	-1089465.728379094	-950396.1073016388	-799553.5199377829	-1033925.2203762238	-1096716.4995903622	-1069395.6234852779	-929762.0600832466	-759282.5643452966	-989098.4272462622	-1046749.052933139	-1022871.5252140679	-888462.0983942566	-737587.3799988286	-908551.8586578746	-960768.7192208811	-951773.0665576238	-827673.9659518393	-865901.0902159412	-1091717.401913948	-1152043.7716960018	-1126893.234625759	-986545.080120642	-842706.6737805647	-1072099.4786869325	-1131911.0477050596	-1105266.539188192	-964473.8609355418	-800213.3267740443	-1025032.4103239364	-1079893.5229624968	-1056584.4085832299	-920932.7898235657	-828992.3608962819	-977549.1501690149	-1156754.2086594594	-990671.3315947602	-829395.5671603099	-910345.9198469846	-1131568.3048240158	-1188996.8150364303	-1164320.7240831852
130	-608670.4075941185	-794766.2849897906	-868710.6878536906	-880493.1730942575	-793784.1718950938	-772447.2522076836	-984957.7702925586	-1027764.3691846962	-1022062.725211846	-901143.3735743244	-750063.4158160297	-965374.2700901179	-1005296.256167533	-1000525.5696632356	-880417.1663427858	-717606.9370616087	-929244.7653078639	-966870.1919986961	-962910.1214988551	-846728.0389451871	-700319.4027708673	-849514.7890528407	-905860.2205646883	-898894.4478133889	-791651.9416170652	-821340.1389708666	-1030746.9783264117	-1072322.536078508	-1065461.5062067467	-941757.7636728869	-797872.6700579389	-1009805.9281611023	-1048519.1576209079	-1042674.3165246214	-919775.1612756851	-763022.4555595261	-971283.3392967365	-1007770.6418674055	-1002742.0230573785	-883697.4325343091	-791968.4011168318	-904263.2930787515	-943009.6970480921	-917295.6600655331	-789519.7113637963	-870232.9506479717	-1076536.1238602647	-1116880.7155583976	-1108860.2872429132
131	-600140.3739964742	-854380.6022400567	-950771.8479888065	-987224.4872624128	-919230.8387100297	-700346.1735132942	-989957.7561329867	-1102031.62844715	-1159102.079095257	-1103558.8859633992	-633231.3693298385	-901437.928119587	-1015679.6235085243	-1078287.2236249605	-1028328.5066578346	-572081.9578742228	-799155.7031734914	-900355.050105001	-950722.3173896899	-896770.1572023318	-707399.2589748033	-901674.4725506858	-974663.2240494639	-987790.963991615	-907711.3812047995	-757547.3332085238	-1035758.6376711822	-1138660.078835073	-1186730.812715453	-1120622.3282273738	-695114.0464224694	-952472.9936608232	-1057356.174123372	-1110865.0617711535	-1049164.118972783	-635942.8510939929	-854188.522381168	-947160.6395488696	-989627.3805196257	-923825.4735521637	-814658.147884235	-948968.3350501626	-998554.5298500222	-988357.3548384141	-896191.9393218736	-814748.4304548067	-1081559.4723316818	-1175288.513651745	-1214359.561855847
132	-612303.9212892166	-803617.9900529494	-772179.6659142198	-879749.0126031175	-793667.7613245884	-744343.5481980016	-969675.1975662931	-1027900.890968948	-1007409.5685999312	-873314.9918130885	-717717.0633446882	-946482.4975329628	-1003379.7235166854	-982069.7610133714	-848002.7406927833	-691517.6299654618	-916133.4557460458	-968726.4933142579	-950072.327993818	-820736.0784609669	-709158.2092691518	-873490.8773411172	-925748.9945683603	-918098.0804223672	-799574.4847744054	-797524.4597572114	-1018721.1960945796	-1074523.6668962294	-1054023.8072576013	-918198.4836309552	-769858.4965192816	-994136.3410650474	-1048562.2320068688	-1027412.607209918	-891697.648214909	-740326.6304713291	-960438.4425369347	-1010709.7493042147	-992147.7109601676	-861085.653925152	-806012.4914152892	-943363.7645909049	-1079318.254915569	-956447.0798694388	-805481.2140196399	-850705.3088164213	-1067767.132084486	-1121146.4427851303	-1100638.0342092956
133	-579796.2233824088	-754246.5535329126	-805870.173373222	-805672.4098247685	-715620.5984472834	-761332.9445001003	-934418.7985043961	-943330.533980872	-898743.6871719715	-740910.7367738542	-754243.3098541623	-941828.1664221733	-945717.0332797284	-900533.7884121917	-740363.7998854294	-741464.8343520438	-946440.388086772	-955613.0218900746	-918017.5926015337	-763990.5106839992	-669502.2741258492	-816271.6563469315	-856597.5391809305	-839763.127891477	-722612.8387110819	-812083.36163402	-986549.1490454838	-998448.2425937566	-956834.5599372132	-800137.8854398187	-801408.7045760991	-989659.6737672022	-996657.2100417413	-954618.3094705647	-796107.0442147822	-783143.2375286885	-987733.5019548358	-999515.2003150826	-964538.0629460386	-812143.9756318189	-759208.3234067592	-878296.7610889471	-907324.8429719098	-873853.7834607289	-729605.0796997868	-862833.7162425045	-1038679.4448697768	-1053565.943423436	-1014925.4404856602
134	-595432.0623709785	-838557.4113162172	-936488.8513648893	-976341.5173304549	-870174.4885466294	-679761.915730792	-962573.9616920027	-1073268.091118457	-1132690.9853267022	-1076464.7344408887	-613728.1468686239	-881132.1241931776	-992909.1701818373	-1055998.9372666038	-1003625.6737017059	-558983.9461952195	-792733.864612078	-891725.6621338049	-941094.8125976467	-881167.781945785	-702141.5844243652	-891222.9147738456	-967761.3923309211	-982242.2636027612	-862148.0696626428	-739514.4717696914	-1011851.9604508767	-1113903.8208594758	-1164446.266001039	-1097860.8364991448	-677439.4089795784	-934721.8271522814	-1037664.3440323776	-1091830.6372057507	-1028295.1946010834	-623620.0817685394	-848867.4204416883	-939959.3359309149	-981481.6039601145	-910492.9802082264	-808851.0995022184	-943888.4181858823	-999033.8777268949	-988142.9613261346	-854121.6577997814	-799266.965308591	-1061129.8967097506	-1154539.5505549025	-1196201.5188644254
135	-605840.4498968296	-854114.5567156329	-967138.2395172091	-1033454.1080281601	-825057.0204952655	-688140.5852201746	-983159.1651338199	-1110336.1931794398	-1199730.4261345235	-1189774.7470187517	-616304.3336839128	-896579.9082221801	-1025676.1391123654	-1121149.088597982	-1123661.817045432	-552161.1205351956	-797869.645135514	-912677.087447663	-993310.6507751342	-988977.5465845801	-711193.8225383564	-906723.1381788186	-997991.8501774123	-1053188.3032317115	-998817.6195141443	-746902.5467693291	-1030367.5650497712	-1147434.2912543118	-1225425.6916004412	-1201312.6015085503	-679482.2157975173	-948535.6289920525	-1067219.4118024413	-1151026.971878025	-1138133.768587206	-617020.9140598206	-853171.2927556504	-958506.9259889538	-1028518.8756628737	-1008822.4013591529	-816547.1951798834	-959331.7195851343	-1028845.4243272961	-1072922.435935263	-1172578.218533023	-805664.4371742135	-1077575.9024088525	-1184532.4066177239	-1251120.9570663595
136	-642999.2553470217	-801263.5504203344	-852246.0063929257	-851406.7628103404	-761452.6108832866	-892695.9531552925	-1060004.0678966902	-1076262.048399267	-1034837.8168318016	-876791.7492522346	-898721.9173123876	-1082901.9826365376	-1093117.8999003442	-1050820.0653827682	-890142.2607974058	-864507.6752341607	-1065645.024065719	-1079285.4339987626	-1044507.4986081294	-890451.9787626539	-720133.5139027145	-850267.7566570978	-889138.2845609111	-873367.8350157822	-756722.9419075171	-927412.283588346	-1096099.171239828	-1115026.273918625	-1076527.2954309785	-919801.0662562379	-929139.1606138304	-1113985.929482	-1126997.359115603	-1087794.3175185903	-929023.8355533218	-891715.612107144	-1092457.72112891	-1108365.925153526	-1076092.2281379448	-923925.1011894323	-797267.7804694204	-899271.958917399	-926030.498232744	-895328.8427039484	-751993.2745688037	-962128.5515213995	-1132194.2120301577	-1153790.499437983	-1118216.7740301555
137	-604993.7810810215	-821798.3445935016	-902179.3022302523	-932623.4510436598	-850529.3301189214	-740618.2622584562	-988113.8644211183	-1063671.8670384442	-1080437.0333001118	-993591.296221318	-698285.1201051286	-937896.7514316734	-1012277.6845429975	-1032624.7648894058	-948486.614706845	-652877.031810151	-872217.3263270578	-938898.8743415918	-954588.6351850962	-871213.6429390565	-703555.4842652373	-872973.5409752388	-934778.795138488	-942300.4050540228	-843581.8033931262	-793168.2657313234	-1033834.9366218599	-1104526.0199456995	-1116765.1922487223	-1023564.1872133546	-752333.984510712	-985205.9645442923	-1054655.9211016386	-1070480.9230668792	-979456.2709075388	-706500.9739190242	-919997.4316978733	-982305.6320616552	-994033.3068010372	-903651.2381345803	-802117.1839690874	-924148.7373569759	-967378.2185401982	-951977.3105316432	-836634.2696608054	-845718.2067041906	-1079555.9462768075	-1145380.1868202123	-1153093.3512431274
138	-611326.6688087274	-830977.0490330756	-921856.1985932033	-823245.0002219008	-872638.2949368225	-728736.5716076096	-983991.9308229003	-1077910.4828778482	-1117011.615755249	-1016977.8999322624	-683754.9346682054	-934215.2871345797	-1027880.0370986296	-1072169.5671016313	-973744.7821315501	-639870.2144758091	-872896.2703957404	-957818.5823389732	-994556.4438575584	-898970.2475814994	-710432.4612941293	-886730.6069665999	-972190.6745209433	-980927.1568768414	-889104.3388035516	-783253.5645537797	-1031181.8319374393	-1118886.888522326	-1151849.8470976204	-1046574.7346778872	-739542.5108215715	-982622.883889684	-1069884.4821681944	-1107941.108129288	-1003896.156768264	-694634.9792787515	-920983.3405367052	-999952.3673292923	-1031035.2115601895	-929628.7157705217	-809538.2612344273	-942484.172404066	-1022525.0954035798	-1138609.2510415912	-905570.3826212354	-837770.4875450532	-1078371.6556421856	-1159863.294166804	-1186688.0634811535
139	-658305.046481032	-773131.3045304713	-811206.4475833664	-803027.3303582439	-709470.5999070912	-927267.3320805505	-1068660.5783704906	-1051936.2606584642	-979116.8252650027	-789390.7138531028	-953680.6790396452	-1123348.1455864776	-1099085.0201300313	-1022963.1356623985	-827719.1452810391	-929726.1762886933	-1135073.5467607952	-1120257.7409485974	-1056762.2431482333	-870413.1412232202	-725198.939231813	-825019.9899454521	-855383.8851446908	-833488.082219408	-708157.1393843415	-957535.4982021598	-1103882.4325236673	-1093462.2468454656	-1027190.1379647249	-842352.2521380002	-976996.1847889124	-1150535.2047149306	-1132787.2015869655	-1063456.8561796616	-874223.4818355407	-947995.4174867199	-1155168.6767779002	-1145838.9272438036	-1088021.0055275548	-907718.2503996011	-792092.8357399333	-876908.6734867331	-899561.2602109852	-863948.7714861417	-706843.6798058968	-987803.601823769	-1139104.1938099884	-1134988.2330821673	-1075263.458218886
140	-582818.5716069954	-788708.8099788547	-865598.286869135	-866701.1382280026	-809453.6165450079	-677082.7875276612	-915188.4249426527	-984501.4348873311	-994450.837385605	-896500.0155703287	-635403.156216536	-870029.1673669225	-936891.7661745013	-947967.3848611839	-853833.254698475	-608144.8552903555	-829082.2312406147	-888767.9619861054	-894722.5725537024	-803766.936765606	-685506.2486230035	-848681.3305204117	-906479.7986644187	-887481.147412237	-811355.06478643	-737414.8857579514	-969826.8659269508	-1035189.3821752035	-1041649.6666656828	-938532.3584279955	-696486.3001377094	-925344.549458642	-988236.0180933548	-995938.9035332729	-896244.5651553457	-666725.1312373852	-882424.6359391768	-938532.3918904087	-941548.4174311596	-844881.9711757667	-788193.9256092001	-908653.8510321573	-947361.2479597024	-908261.0895353158	-813256.5130278519	-797746.9214584301	-1024465.2352889377	-1085877.3385555758	-1088848.477760761
141	-618789.1497084718	-841643.4333481396	-934704.7697684721	-825160.944027083	-887489.4169255075	-744426.0241262775	-1003712.8182266196	-1102203.7930746875	-1145932.2247879796	-1048088.0645837612	-698720.1292397314	-952532.5381128555	-1051073.5545261826	-1100376.5758826332	-1004162.5836336955	-649983.4344892997	-884984.1037376638	-974166.1820295448	-1015104.4604046671	-921655.8230653893	-716897.4805640171	-895834.0004781964	-984500.9863680031	-994524.875218219	-904044.7325922735	-797123.7261456432	-1048671.8261848113	-1140476.269712226	-1177580.5181984734	-1074255.7743343767	-752855.9089144437	-998898.5720436085	-1090542.1783131228	-1133108.1203424088	-1030998.230237314	-703567.7380151569	-931570.238675842	-1014342.9133031862	-1049175.7181807903	-949618.044891465	-815005.8195965805	-950024.5758390675	-1034297.1486445522	-1163888.7439201144	-920600.0482052434	-849821.3574879905	-1093630.755288967	-1178748.7463497645	-1209228.7952011346
142	-576579.7631181683	-762402.2451269829	-815214.3584597551	-845685.6585826619	-760859.6588054125	-674809.4108116869	-889898.3134631393	-935113.30867267	-927701.7052469872	-803655.1798448791	-644374.2772072658	-861638.743653764	-902679.275460373	-897265.4588796303	-774704.0032183605	-630278.9812363721	-843263.684444253	-880414.73363872	-877166.7216966389	-759385.8479219439	-677732.7311864586	-825186.3169086132	-862109.442276109	-873328.4771622871	-768619.1096778609	-735580.0213507024	-947370.7740956307	-991238.6942471971	-982738.6910508518	-856137.4066301747	-704356.623684869	-918060.2516381196	-957839.4881091777	-951373.3339948242	-826236.7574304505	-686075.4105328076	-895520.4880014254	-931536.5165136941	-927199.8203930914	-806735.0079479801	-778885.7025327027	-887970.3870297011	-909004.4644227342	-900971.2316029354	-776378.5638713938	-796350.569389718	-1004843.1722496875	-1047364.0863991971	-1037775.6702556782
143	-622903.413842123	-814861.398829628	-769865.5347940916	-890112.9932359927	-803768.586633988	-768469.6368790874	-995390.2147651177	-1055179.810194736	-1033082.323855588	-897431.2143867054	-743321.0804807448	-973840.5365697022	-1032581.823821409	-1009391.2381671157	-873582.6240583883	-712719.1166049927	-938961.8681480201	-993137.2637293764	-972848.8749108766	-841925.3900113301	-718052.7900566092	-884460.3401430657	-936705.5494759292	-928633.9095376313	-808365.9162162456	-818917.3265900951	-1041559.380718814	-1098777.235223988	-1076822.3269479857	-939581.9537928434	-792650.3677289862	-1018528.52023254	-1074639.4180709901	-1051770.6194145828	-914467.0040151163	-759063.2676889029	-980647.8348659257	-1032355.1455008187	-1012307.8984709133	-879809.9139539788	-813202.1596447092	-954059.2814129088	-1103545.4950618972	-967154.7566692892	-812963.2523812946	-869364.9538011027	-1087728.4841289155	-1142374.6602096455	-1120562.3167440167
144	-591256.6082600112	-762653.74701889	-810064.9537938024	-806228.1503500559	-714688.6798615572	-810330.1384612498	-973204.3197686269	-972596.3063348944	-918964.4912159513	-752268.506115101	-810899.7910075185	-991365.4876235516	-985323.5491965956	-930642.5793646227	-760671.0714310796	-793340.7600059403	-996385.9743137273	-997557.2157128239	-952162.7829119106	-788975.9039868738	-676002.4168494578	-822194.8056142076	-859491.9216621801	-839565.036352073	-719527.2584147954	-855402.3409116523	-1020779.0456477292	-1024245.6270644902	-974617.9439903174	-810042.4699682302	-851599.6485817721	-1033744.3757324272	-1031921.479682079	-981435.5570133635	-814238.9508597183	-828654.7833367095	-1032066.1458565241	-1036816.8777985715	-994953.095675778	-834525.4997349032	-760748.2236080716	-881735.8666230405	-908918.8276355286	-872901.859857274	-724365.8378754897	-900474.4808302143	-1068353.7187700467	-1075894.9380508708	-1030271.4065078988
145	-621667.3825041963	-845757.391904264	-939660.3843196764	-825899.9117201231	-893217.4029579542	-750477.349066719	-1011319.0427046103	-1111573.5727852983	-1157086.725082001	-1060087.062957532	-704492.1123628826	-959597.3886902278	-1060019.1509578566	-1111255.844966665	-1015894.5418167051	-653884.0409905775	-889646.3064047643	-980471.3502695584	-1023029.7034850213	-930405.5094263754	-719390.9985692985	-899345.1231342502	-989248.9976205365	-999769.4312047565	-909807.1502066635	-802473.3618113191	-1055417.6089501034	-1148803.160703973	-1187504.6791328094	-1084932.1803754002	-757990.8043370573	-1005176.0044480537	-1098509.7241369893	-1142814.8815248301	-1041451.3325954617	-707013.0478922377	-935653.5399048073	-1019893.2580111853	-1056172.3995509574	-957327.8056819278	-817114.6230899368	-952932.862875401	-1038837.5568769325	-1173638.8882005154	-926396.8973997443	-854469.3036003832	-1099516.0957845247	-1186032.7486226473	-1217922.6162169173
146	-576033.8787321749	-779223.7939098589	-854919.6128716096	-857860.831889868	-796853.150398132	-661660.3994560515	-896345.2532281769	-962499.0273971235	-969845.5502695995	-868443.4977553516	-620564.4234973121	-852566.26408522	-916138.1943601645	-924621.4580655885	-826696.8030653535	-597984.2951489122	-817761.8325656971	-874827.7832108305	-879023.6909845656	-784335.7052417169	-679660.3812307057	-840862.2681135514	-897899.4796238504	-880920.1582028482	-800661.8826806211	-723805.2125618877	-953162.0943229886	-1015731.7099517522	-1019920.2029096496	-913686.3946718834	-683291.1795882614	-909862.3954026231	-969836.5309813523	-975274.854141256	-872179.5540629392	-657734.8471496217	-872535.7457662281	-926349.94039152	-927877.6211823907	-827880.2329428468	-783286.8837035926	-902500.7422916	-940879.2838760912	-903979.4180923203	-804470.6149631103	-785949.9631420799	-1009978.8650707845	-1068964.4003277533	-1069994.8399069551
147	-607852.1079320549	-798895.7302728505	-773151.6067669907	-875396.1148408422	-789425.389455719	-734210.5306681129	-958874.8260887001	-1016443.67673231	-996626.9472440686	-863186.1180729892	-706963.3121708133	-934992.0527780285	-991114.7684214439	-970594.6723406522	-837259.1257628013	-682612.9526007262	-906545.4654958864	-958473.9087447416	-940506.1213769193	-811836.5146641036	-705422.46311354	-868883.6755549136	-921147.2141300489	-913673.0058680909	-795882.0616016919	-788539.4022330663	-1009129.1014866531	-1064337.1075962046	-1044448.3720210026	-909217.3727321076	-760285.8536611809	-983891.564865988	-1037609.7487009002	-1017182.181220619	-882134.4618850563	-732457.1960227322	-951950.4472615711	-1001618.6288163121	-983680.3818314149	-853221.4179267559	-802992.8127941163	-938871.6208007865	-1069142.7535175313	-951949.8288582407	-802338.7392123834	-842868.2112980196	-1059383.314348416	-1112230.5384239093	-1092269.7857599289
148	-624662.251374321	-787159.7045574007	-822292.2340439331	-807848.0671198833	-711972.2493036969	-953151.0639842341	-1086259.4479508875	-1057902.5117690389	-977905.702230402	-785375.0372866546	-976046.6172036049	-1135760.8190688593	-1100771.778017067	-1018406.0825891938	-819864.3248099574	-944552.8420718173	-1141971.3491900489	-1119819.4943818937	-1051691.904643927	-861805.3194611925	-694949.550853772	-839460.0731116468	-867928.6983706045	-838987.6233471895	-710533.1630786306	-981671.9537806681	-1120555.0760294916	-1099441.899102106	-1026454.3689784278	-838913.1422436669	-997900.2118639548	-1162245.9781113458	-1134712.5830240091	-1059604.6072058785	-867091.2772721135	-961315.4638531732	-1161290.4691502305	-1145546.779881862	-1083609.256837121	-899764.9497644717	-765236.8474288326	-891760.4454946371	-913565.1011569877	-870127.1170795468	-709094.0782931318	-1010192.7810265908	-1154850.657064504	-1140981.2709787649	-1075003.051182862
149	-542833.7345889809	-783485.0923602831	-821757.0364305726	-809727.4801965115	-715669.3722731983	-883229.3672267301	-1014018.6006693344	-993436.5308518513	-928832.2723765672	-755011.3748255089	-895171.2585462326	-1037825.8710684362	-1009698.0231173267	-943937.9055257938	-766062.6211985085	-879344.1987707287	-1043836.2865151527	-1023091.3846265995	-967758.7266868128	-796926.0010350817	-759249.2537250665	-858941.1818572654	-872524.3468669831	-843029.1077016626	-718538.8693886684	-922093.1867616086	-1057987.6551703908	-1043146.6784328555	-983506.5617803986	-812441.9896144118	-928812.8607964853	-1076036.6887005859	-1053974.2237859764	-993414.5542929027	-818980.5062414143	-907184.66786699	-1074986.1749868318	-1059732.5671130838	-1008929.1486963568	-841513.3349151767	-975664.772853307	-934397.2713542477	-923291.5933088878	-876330.672608749	-721408.3657510019	-960956.9677634959	-1101956.6471714473	-1092856.838016977	-1038180.85118423
150	-649423.5973480509	-765667.7192162455	-857013.8986644442	-855439.6386337053	-763224.8537009729	-893078.4489533836	-1060568.2366127465	-1074994.6348203972	-1027476.2344619636	-866461.1755440201	-895046.2416026884	-1074343.239703357	-1085145.1554828724	-1037949.7044876013	-874524.2975345593	-859541.5197455179	-1050366.1310018913	-1067870.8067000096	-1030820.2645346546	-874687.6695732225	-729482.1844165828	-817561.7479781434	-894544.1168039185	-880372.0941301513	-761257.5037987838	-928812.7940278598	-1097572.5848364432	-1114749.1991589796	-1070605.7247554297	-911070.3628079135	-926737.1302489822	-1106809.6808741984	-1120374.94765444	-1076686.0219056455	-915265.1980011174	-887701.1383198712	-1078507.831702252	-1098199.5757625587	-1064030.1767038263	-909843.3278665773	-809540.7676074153	-869455.7777094662	-932074.2782701465	-905304.4890807536	-759290.1538965945	-964547.0609894932	-1134576.8706111624	-1154503.763548584	-1113735.1994360527
151	-598977.4752221791	-785135.7302702576	-858351.2708001263	-870455.6735441393	-784080.8779819601	-745644.7053622338	-958301.9424681923	-1001617.8059907736	-995529.452058564	-874386.1670807643	-721290.4646567695	-936672.2349281297	-977037.5551248486	-971915.4131695007	-851658.4922492255	-693871.9953550367	-905640.5391798423	-943698.6955746198	-939391.2837182701	-823017.4601532731	-692940.0264872253	-842117.8519712362	-897943.0443830072	-891291.5262955646	-784252.1015369234	-797717.9138916306	-1007274.8347628184	-1049346.753631302	-1042104.0403156247	-918177.9628154727	-772361.4937959053	-984368.4576690353	-1023513.0498415309	-1017322.7677180186	-894277.3266863371	-742093.8601524612	-950486.4621428536	-987392.6325329078	-982024.9940947569	-862791.6607382942	-786902.5805085053	-899099.9736399151	-937534.7609209344	-912127.3165757006	-784423.3251134199	-849791.0489750465	-1056247.6645574446	-1097075.7122178113	-1088678.628608574
152	-539406.819955289	-758375.4450841955	-808707.9936139225	-807216.6900033989	-717133.6359743978	-756339.1995278616	-920347.0023537705	-926748.3658054838	-884571.9126029606	-731273.4802499101	-748454.8984251702	-920460.0998313626	-920981.768156096	-878594.6669431838	-723424.7139845912	-741461.9045298356	-925259.8448317441	-929250.7171494705	-893447.7469973956	-743937.8628001402	-712914.4751052853	-832401.3679671356	-861529.8084098409	-842034.9798155646	-725085.300815179	-809010.0628556878	-974841.9856207139	-984149.1784289316	-944497.032420332	-791738.2276797714	-797813.5883712593	-971210.2208452208	-974843.7838923654	-935159.7606172292	-780939.1215714935	-784984.3553681382	-969413.8233222656	-976195.1931296972	-942702.568805123	-794101.0139115471	-886422.1302505821	-906427.2908500759	-914351.5598104933	-876853.2070689858	-733036.9652048026	-861680.8780406662	-1029336.9063876572	-1041549.9982427044	-1004422.1522377034
153	-601277.1428239334	-849808.3885600662	-950567.5192607525	-992867.363002746	-884595.1021121879	-690563.7107259878	-979988.5064524158	-1096798.6650543148	-1162730.7367116995	-1112853.0102298046	-621802.7424899924	-894134.4693780994	-1012455.1807896665	-1082289.7993461513	-1036500.5360367732	-561232.1725514306	-796999.9757647807	-901540.5657377992	-956262.4558918555	-901853.7098654592	-707729.1675318554	-900636.2236796423	-979486.6676653642	-995787.1699202113	-874315.4587393039	-749021.3484210557	-1027264.5109183099	-1134733.3999006995	-1191043.2504126895	-1130081.071072326	-684641.3491379563	-946204.790220157	-1054970.7790368537	-1115127.1664139535	-1057373.8314614599	-625646.9859084986	-852421.4955873594	-948425.9911843674	-994646.9284307621	-928390.6093118791	-814181.1845974273	-951464.0587492685	-1008405.7611623764	-998706.9296223773	-864035.8230587201	-807478.9236161236	-1074540.4528842038	-1172668.1346971341	-1219355.7336441784
154	-606927.9672076681	-751477.4665923892	-802095.0707524526	-803208.8772228011	-713551.4385033913	-777921.6470762698	-949243.151930803	-958799.7739068575	-912555.8995214864	-750622.5243226907	-777855.6064253947	-966657.2542149137	-970393.5661234207	-922713.0981195382	-758123.4483722307	-766395.3626132238	-974764.2463409408	-983049.0168733295	-943113.0836452453	-785222.5769487311	-691432.227708593	-811651.8057598157	-851125.2010252946	-836413.5263435511	-719221.716135472	-826016.0841293635	-998964.0334225328	-1011662.1620816526	-968788.9266452614	-808570.3159875136	-821687.6994807663	-1011366.6572578526	-1018380.2540875457	-974251.9169321788	-812033.8269643132	-804832.1997257937	-1012874.776954912	-1023857.3295322102	-986830.7044173448	-831305.3959410712	-775936.4904103006	-871826.1438297621	-900155.2688010477	-869618.1129089904	-724891.9943206593	-874110.4586824572	-1048684.8346275145	-1064524.5502855584	-1025021.9581938903
155	-620289.3256728379	-754329.9276490071	-839857.417133189	-842288.0700705823	-752115.4449881342	-810507.7745288407	-989674.5533823576	-1012271.2103421192	-974583.235121857	-823279.1903300912	-802487.414089967	-991035.0988069018	-1010066.4646546996	-972923.7480678372	-820170.9197669799	-777536.9906735858	-973882.0254128203	-997318.3630589569	-967966.5860447355	-821570.7770596494	-707773.2977263591	-811283.5657894578	-882033.7278512438	-870295.41113487	-754579.2940569522	-855747.419932157	-1035084.0108042916	-1059398.4063833838	-1023947.7512781407	-873047.5184710178	-844590.7279588023	-1032868.4658617675	-1053634.8304433855	-1018851.2186173169	-866893.8911564272	-815512.5113719793	-1010991.6040391652	-1035746.6827976077	-1008292.7746993102	-862631.8487086478	-795257.2668833974	-868237.2046540291	-924209.9804216452	-898302.6911588325	-757043.1431257703	-900986.9911733187	-1080493.4057643374	-1106525.6024627597	-1073312.2557722698
156	-578787.7685480565	-764570.9862079419	-816571.8443848267	-847889.8702379857	-763028.2811755093	-680450.1579786444	-895614.8904105294	-940751.590222068	-933405.645558316	-809285.5745775396	-650384.1091120711	-867722.1572150358	-908643.468006064	-903336.8824456658	-780706.8608875964	-635228.9760336442	-848231.6264384837	-885184.5404115091	-882112.8624192995	-764325.3387601937	-679510.0121150395	-826879.698106131	-862997.2595790061	-875039.7772104047	-770381.2962542685	-740566.7104255395	-952421.7929174709	-996210.5294855123	-987777.8772432625	-861114.3954092269	-709695.1845565169	-923461.7098204733	-963123.7785849865	-956763.5848857391	-831568.8058553634	-690443.0319198874	-899897.1616698878	-935720.7706177292	-931556.023178489	-811092.682339148	-780232.2591311104	-889188.4082570848	-909422.6131468032	-902189.6199582799	-777734.3148274983	-800683.2003724346	-1009228.6329471039	-1051669.4756698236	-1042150.1019846505
157	-659715.6543517793	-688363.9167365131	-859683.5552066127	-855578.7386205674	-759970.2482765877	-869205.2696053474	-1057182.6329099825	-1056525.4081057096	-1001255.2909554098	-840507.1355109793	-867357.0635654948	-1068185.698204978	-1059779.3219066144	-1003100.1167141756	-840116.2678070716	-839874.3928468245	-1049414.6023258232	-1046039.6385749773	-997401.1258237915	-841013.3018387994	-760894.0052637784	-884940.420692462	-919683.7441056136	-885627.8073174512	-762164.7784970616	-909038.9851943458	-1096589.9865695504	-1099568.4412465235	-1047997.9623847585	-888480.9323311469	-903480.0512091782	-1103276.5669425982	-1098748.871248883	-1046047.4170014175	-884752.4107370119	-871757.0702357552	-1079645.6987680518	-1079711.0717749284	-1034624.0234120925	-879879.2897512172	-862072.3488170502	-1081516.9246193632	-979683.8779117543	-915676.8135337002	-764359.3096373762	-948872.6234690645	-1135997.292543398	-1142611.4743873372	-1094740.6337656945
158	-611272.7154330331	-830761.7766544543	-912211.0127255647	-944092.9860841645	-862180.9271641346	-756056.8608814996	-1006559.2393233306	-1084678.5985651158	-1103702.402931179	-1020035.0893141247	-713294.9401962351	-955016.2126888795	-1032155.0659930429	-1054972.1710115871	-974129.4769666279	-663303.4728671563	-883238.6866020889	-952205.5973035616	-969877.0132044107	-889546.0359252723	-708871.6684077723	-880097.5146300156	-942742.1408817039	-951336.1110158922	-853236.0592404745	-806764.3362337002	-1050104.6804715046	-1123043.038923245	-1137238.4609245071	-1046897.6875303176	-765675.1004488845	-1000356.2618240099	-1072241.7545152176	-1090226.4984832278	-1002132.0689698737	-715743.9064790392	-929615.5341472208	-993931.247906881	-1007377.9535054174	-919669.8088704421	-806470.6175930809	-929433.2526055769	-973273.198909121	-958579.1886552039	-844291.1836880918	-857471.7490859007	-1093650.0590698177	-1161407.494488958	-1170774.5189676965
159	-595943.729179503	-786263.9208240348	-775751.5000849023	-863752.330372448	-778077.256241105	-707105.2140316815	-929984.3709179927	-985796.1999328778	-967783.9727639274	-836091.8858676254	-678197.5639879545	-904255.6859991057	-958306.6251011011	-939899.3823159644	-808520.4915269389	-658793.3846581577	-880898.0696563922	-931048.7562391993	-914916.9956702148	-788030.625260619	-695429.5284203438	-856559.640502706	-908837.6809131321	-901836.1520799983	-786005.0137275633	-764504.8213720204	-983470.7266947851	-1037088.569394378	-1018834.5602167607	-885193.3488969447	-734679.5113301869	-956487.2993620739	-1008312.4019739409	-989816.3018122795	-856553.4152956012	-711406.8512611947	-929245.483131326	-977300.3348157632	-961030.6986128917	-832184.9787602981	-794915.3230507374	-926855.3601510455	-1041923.7946521471	-939919.9066467696	-793932.7757941369	-821904.3662123593	-1036957.0199412454	-1088380.9388255463	-1069885.1384183678
160	-592736.4358334292	-763739.3298216042	-810606.6067833927	-806299.910606083	-714568.3454370098	-816656.9241162001	-978212.5183962642	-976375.2629187609	-921575.5120237643	-753735.08340925	-818215.5857141551	-997762.0174617716	-990437.7591438855	-934530.3911204712	-763293.2573956081	-800039.2632411375	-1002835.2215648933	-1002973.2794163219	-956571.7966283397	-792202.1546178234	-676841.7508278784	-822959.63504191	-859865.6601578342	-839539.4576891221	-719128.8314115832	-860995.9244319275	-1025198.9971038317	-1027576.7264358968	-976914.2317984083	-811321.4040917289	-858080.577771213	-1039436.8335539405	-1036474.9950419524	-984898.3466823711	-816580.2418109723	-834531.48303876	-1037790.6192968935	-1041633.4744019454	-998880.4510447802	-837415.5245339478	-760947.0639439374	-882179.9427384242	-909124.6516529609	-872778.942275428	-723689.3183171848	-905334.8622149874	-1072185.4233077017	-1078778.1799567305	-1032252.9615693548
161	-577058.9322355713	-781996.9775518638	-862855.5179495	-814446.9800343781	-804441.894441983	-656690.5545913161	-893433.5516969085	-966355.5234080344	-984208.0849746491	-874119.9226258709	-615034.7125017891	-850102.4110413976	-921375.3296038996	-942642.8909988923	-834066.1386598102	-593430.2752673168	-817388.9003580587	-882750.3513678096	-900199.8850137986	-794798.0111448192	-680745.0717708296	-844927.7943405939	-915661.6824637721	-918486.3900087808	-820498.001912469	-719561.7373930074	-950867.7214443072	-1019748.3798504614	-1033694.5216796689	-919463.3105063156	-678407.3434597729	-907884.87092879	-975024.2742543682	-992374.1061578457	-879443.3472132633	-653615.7220956369	-872368.2698339847	-933870.9333930025	-947733.9461325437	-837837.6514055782	-784431.2154449989	-907858.6152954644	-968467.7886169553	-1022525.7374886294	-836554.1093557252	-782432.8535557878	-1008301.8204138841	-1073141.2362928884	-1083180.9500796373
162	-591386.4717477661	-781429.8112711653	-776746.4619845005	-859296.3314153472	-773734.4010545786	-696732.1894371717	-918928.1856665155	-974067.6141773846	-956745.9580572777	-825723.1032112424	-667189.1032721989	-892493.0826390286	-945751.1666230877	-928152.4987568273	-797522.4071385592	-649677.794258938	-871082.9816647386	-920553.3325825057	-905124.2072712448	-778920.2695474293	-691605.2987042986	-851843.3141666275	-904126.904333072	-897306.2667769624	-782225.1331272466	-755306.9469574019	-973651.4371309999	-1026660.7348583265	-1009032.3246122727	-875999.5145859929	-724880.1342434852	-945999.8690221343	-997100.5020271913	-979343.5615760868	-846763.7187211267	-703351.0241751958	-920556.4442058798	-967993.8852675896	-952362.8153250862	-824134.4732531502	-791824.1213911576	-922256.8170339998	-1031507.279931633	-935316.1353408145	-790715.8694414981	-813881.6419776322	-1028374.6260673944	-1079253.8555111785	-1061318.682599831
163	-589525.36732337	-832858.4627988329	-924729.878343005	-957604.1034579335	-887007.1045352537	-678814.0085590954	-956179.0406454959	-1057717.5654011858	-1104191.3325581036	-1037833.0545019661	-616472.1046404478	-876240.0451979334	-979050.4283057533	-1030362.4749225933	-968912.5085924338	-566179.6745443365	-790926.9733488656	-882414.0208091997	-923594.5261746594	-859374.2490152981	-697129.8957242807	-884116.9002027772	-953779.3633173043	-964056.9261705513	-879850.1179050328	-738609.9434535326	-1005916.1983522025	-1099546.4154262221	-1138290.478516405	-1062623.10157917	-680121.0195453617	-930248.9027202167	-1024999.6345763374	-1068513.899284528	-996767.3696897399	-630538.7272771182	-847337.8683107289	-931723.2429611516	-966114.7728806793	-891497.124482401	-804734.4274226336	-935375.3310546611	-982828.779282367	-970509.6667698117	-872693.1443789329	-798405.8158907939	-1055653.3066630303	-1141375.2523899616	-1172389.6374931794
164	-598513.9116536762	-784675.1499070463	-857855.8326651339	-869975.631083122	-783616.8188737353	-744362.876109343	-957027.130038526	-1000367.3490936069	-994260.5007943825	-873106.5062258891	-719914.401005035	-935299.5628272177	-975686.0854360135	-970547.1351571565	-850283.1113967997	-692736.8740260609	-904511.6693109745	-942590.5209626734	-938266.4975389946	-821883.503978373	-692587.1085185336	-841764.0941590526	-897564.4061853581	-890927.9172973161	-783898.2048891111	-796588.1832246333	-1006152.2817300281	-1048247.9390216791	-1040986.9717316099	-917050.261082848	-771141.4242183054	-983151.9130628718	-1022317.1351160619	-1016110.3323082878	-893057.8951729642	-741092.9520682638	-949491.853471583	-986418.0561752481	-981034.2041556366	-861791.8441911238	-786660.3081198741	-898853.0383789907	-937272.9226215383	-911880.1410400154	-784179.5909258656	-848813.4169723802	-1055277.37092153	-1096128.5398172946	-1087713.4427044685
165	-541790.0112479201	-775837.5353741251	-817782.7353399245	-808962.7776552535	-716115.3379203681	-844582.8749924733	-985489.3713167191	-973125.5508971432	-915352.050218335	-747781.6077363	-850486.3725942094	-1002080.1907770737	-982678.025267311	-924036.5450954337	-753076.5437118893	-837349.8732035343	-1007721.8765826287	-994510.6624738879	-945126.0928778446	-780787.5900774717	-745137.2331124455	-850858.0440538889	-869175.7789455383	-842726.3296667157	-720532.6929911964	-887651.8573102439	-1032664.2709331714	-1025178.0172899911	-971625.5665794658	-806136.3176357459	-888914.8729832033	-1044110.0599523991	-1029873.7439276853	-975672.0966051017	-807394.3754647933	-869966.5483416208	-1042832.3750293804	-1034289.8828337097	-988758.7521094291	-827073.1310073116	-948484.4549700837	-925878.5527336525	-920568.7587391548	-876489.8190920888	-724950.0474008607	-930720.7981681828	-1079839.1080496237	-1077230.494220141	-1027899.0829405965
166	-570887.9146030247	-757226.9365007328	-828330.2759000066	-841367.5770570526	-755961.290212268	-667972.4658919048	-881054.8862838456	-925846.5694200508	-918637.5522634803	-796845.321342902	-637908.106793657	-853495.3875470671	-895145.4645274789	-889004.8248855281	-768317.5085015041	-625089.4991737033	-837236.8492283128	-876549.0314208842	-871235.0442873316	-754305.5662976227	-671555.0183702814	-820681.9536716354	-874999.5230878763	-869258.6969449902	-762807.7905144995	-729262.0640145163	-939253.9124875583	-982764.2573279502	-974415.4473406156	-849845.0558935817	-698431.5720156976	-910652.1309717203	-951046.7874799609	-943855.437124229	-820386.0683063562	-681443.994167388	-890218.3080810077	-928338.3333245316	-921988.2354994945	-802207.9362655662	-772222.1236969745	-884136.9708242633	-921668.7108621304	-897149.7543491719	-769654.2908289141	-790551.5934440537	-997452.8761912709	-1039681.9514289238	-1030193.3424380561
167	-580401.6347245704	-786692.0636959419	-862888.9897543411	-887701.7384498387	-804894.5513876413	-680151.2696779787	-915870.497352072	-981396.6612132576	-989315.6195492512	-890021.2326563635	-639497.4864446118	-870846.4729642881	-934425.7041912804	-945098.6575543812	-848053.4860360742	-612040.7130853597	-829050.940164108	-886781.6104462186	-894709.9983455049	-799412.7821390763	-682734.056430245	-845071.7039857107	-903589.4637925652	-906911.0553665296	-805769.8341240815	-739917.7399378882	-970112.6711064944	-1032002.0508688302	-1036579.3531487249	-932175.9320360697	-700082.0166899599	-925868.1363143802	-985779.0440933038	-993145.175739688	-890643.9799302302	-670299.9981585634	-882327.0612424286	-936772.6115964742	-941767.5103408274	-840912.7201197714	-785066.4758660411	-903451.3442754796	-944289.8707611657	-926120.3188926011	-806645.1122908981	-799684.1476977976	-1024354.7823310499	-1082607.4496337834	-1083843.0867780654
168	-590582.2018399679	-776794.4836185337	-849378.7395879216	-861761.9625428105	-775676.6302287692	-722430.398331837	-935214.7121824896	-978971.661604818	-972548.3692139597	-851211.1303800007	-696369.5447817588	-911812.7370419891	-952562.0391946735	-947135.493527423	-826749.9380717194	-673314.6122338698	-885196.371850877	-923629.3254716974	-919021.073216081	-802481.1783171555	-686548.5776548029	-835711.1933246886	-891085.7945942061	-884706.459754668	-777842.9285360595	-777258.1572538534	-986945.0672042063	-1029446.8959398456	-1021873.5977470455	-897754.9507794895	-750265.6727581384	-962336.4749069286	-1001854.6803226579	-995365.2037191154	-872193.0611805058	-723967.1186045012	-932473.8048268327	-969742.7663434327	-964081.4951478437	-844684.6872488518	-782514.9558681789	-894627.9030027356	-932792.7918476026	-907650.8944915102	-780009.2268620885	-832085.8441504149	-1038675.359725923	-1079922.139800328	-1071198.8263113622
169	-592135.9470797412	-743373.8570130058	-823278.560271432	-829579.2887089504	-741380.0680092722	-730717.0907706723	-921167.7197091379	-951659.5590306208	-923471.0380521305	-781551.0568218299	-713044.8585269325	-910531.7776087137	-937515.5242803113	-910087.0864937175	-767647.5123118978	-698293.3912780699	-899972.9878021262	-929141.2801156212	-907229.066115553	-770242.2248550741	-686795.3061486774	-805216.7575299301	-869944.5388556186	-860557.9900490999	-748125.926377751	-785142.0119132341	-974699.302990687	-1005911.1649032688	-978860.6591298803	-836304.8278097735	-765210.031934612	-961416.7047508279	-989141.720468405	-962963.5983265075	-820151.150173476	-745754.3321651546	-945748.5137101294	-975396.4547405145	-954431.9403554122	-817009.8863170457	-781454.6632693118	-867059.6585339298	-916610.4578673848	-891536.629871091	-754871.7847462298	-839566.8627113178	-1028230.8237978715	-1060162.7708015523	-1034250.272363152
170	-665461.4514897714	-686875.2227775105	-862911.7753615134	-857966.0060257126	-761832.3498766321	-883059.8453687972	-1069861.7847973078	-1067034.4864994956	-1009629.6168838685	-847135.6538283329	-882845.0372967646	-1082985.322000251	-1072209.2083572338	-1013275.6615244224	-848379.9288917312	-853819.1526990492	-1063217.3200403815	-1057812.0359825394	-1007248.9399647991	-849086.7242425663	-766263.0285077028	-889163.5608484525	-923100.1918189463	-887692.8009511582	-763415.3303723992	-921360.557341432	-1107857.598761902	-1108893.457041469	-1055409.0471246657	-894329.5955032507	-917286.0419460901	-1116500.6716671246	-1109840.4989220577	-1055114.012912427	-892111.5453803034	-884095.3580787876	-1091920.6296668565	-1090170.2913950614	-1043367.3738319715	-887053.5926973989	-867064.597829809	-1091451.8988890164	-983288.5535228349	-917419.5333968559	-764998.3118301445	-959661.1913211555	-1145853.3657194073	-1150752.4275834423	-1101188.4773148322
171	-618630.9586073402	-841417.3252880238	-934432.4032928335	-825120.3294828958	-887174.5999937133	-744093.4361031491	-1003294.7710737225	-1101688.8188266056	-1145319.1601718355	-1047428.5853477372	-698402.8941754514	-952144.2455140689	-1050581.8938961225	-1099778.6383014666	-1003517.7812444803	-649769.0525121243	-884727.8635284969	-973819.6424764588	-1014668.8796095765	-921174.9298860548	-716760.4338457902	-895641.0249968544	-984240.0300168213	-994236.6281772954	-903728.0232597432	-796829.7038004515	-1048301.0699328426	-1140018.6138697437	-1177035.0744983174	-1073668.986347572	-752573.6889486696	-998553.5568850662	-1090104.2725088855	-1132574.6251914431	-1030423.7152867744	-703378.3796825006	-931345.8155789258	-1014037.8597500745	-1048791.1722427905	-949194.3072595693	-814889.9172459507	-949864.7329210909	-1034047.6024025199	-1163352.8643824342	-920281.4464720776	-849565.9008360435	-1093307.2899685418	-1178348.4089128817	-1208750.972447683
172	-612584.0629146146	-803915.1502041538	-772118.5040755619	-880022.9297142994	-793934.7233141284	-744981.1939781066	-970354.8382829839	-1028621.8651790688	-1008088.0923452771	-873952.3768347309	-718393.7703607467	-947205.5628575713	-1004151.5268651539	-982791.8600176321	-848678.8098600347	-692077.9793310947	-916736.8043048211	-969371.663153019	-950674.3057623242	-821296.1060423963	-709393.2905531467	-873780.7971767831	-926038.5732519857	-918376.5394409035	-799806.839850028	-798089.86724786	-1019324.8029304576	-1075164.6819277627	-1054626.3657603648	-918763.642770216	-770460.8793045592	-994781.0195423304	-1049251.4447454358	-1028056.3826639238	-892299.4359242071	-740821.8345557156	-960972.5711272508	-1011281.8310753593	-992680.5390808912	-861580.5308838997	-806202.5123369332	-943646.4441108943	-1079958.5741006264	-956730.0807742438	-805678.9622021554	-851198.4780176133	-1068294.7050394134	-1121707.4986379386	-1101164.6274274432
173	-591107.5147481997	-836066.2985112716	-928611.3865211387	-962018.9677535412	-891809.9934653377	-682023.3385559961	-961213.696710103	-1064322.4958445702	-1112375.6793894023	-1047629.3700572806	-618970.0425397751	-879995.7437861094	-984509.9431839198	-1037505.5714914519	-977768.3549642543	-567059.3991322311	-792153.4505525624	-885088.098572247	-927637.8740814419	-864948.0410683163	-698660.5256260614	-886733.8244056503	-956892.0647498532	-967594.4413107492	-884002.7884910926	-741432.5269296007	-1010364.1596180954	-1105376.2357686595	-1145510.4221651547	-1071267.780749846	-682355.7029134016	-933561.3630260546	-1029822.3179054447	-1074826.2629721116	-1004577.0098059031	-631344.2020962716	-848358.9458314248	-934024.1588257849	-969619.2842552456	-896315.6060721788	-806213.5398958114	-937401.3435603031	-985172.6737828925	-973169.8321928303	-876195.5969962992	-800841.6528472559	-1059514.5735055392	-1146429.9622573475	-1178645.1783322578
174	-607646.7866057963	-823418.7110124129	-904676.3142470034	-899051.7590251559	-855564.3378925857	-733520.1788586568	-984143.9881815714	-1065018.0498229114	-1084492.548911061	-999171.3183514976	-689704.6924923949	-933933.7132588159	-1012838.3347968922	-1033400.535708508	-953137.6252694892	-645326.873158286	-870508.6152138798	-939781.2889177828	-952171.7768184643	-874874.4729308824	-706898.8827699529	-877294.7646298673	-937879.0100698677	-911490.7310000313	-850486.1837984122	-787218.7454771323	-1030810.6923024412	-1106393.6766441439	-1121167.4588336463	-1029454.8130432281	-744773.1269670597	-982000.6511628128	-1055567.941632568	-1071557.8697144662	-984309.1659227902	-699624.5874618052	-918612.4923157992	-983113.41134221	-991575.9536412219	-907098.9086243067	-806150.9788890467	-931170.818202259	-971081.643392732	-923929.6335803145	-845408.0297042388	-840917.2495505449	-1077477.320134126	-1147769.3172094985	-1157842.3412679874
175	-636848.9745092812	-760774.2228429038	-849609.0015418779	-849763.2992261824	-758429.929493393	-857440.1772983952	-1029969.8630473693	-1047922.6209817457	-1004647.123615201	-847823.4287848843	-855096.9901044458	-1038386.6706547041	-1052740.4936839612	-1009883.8964308831	-851064.8737651993	-824147.6016944351	-1017354.879110482	-1037419.715317671	-1003692.0318521657	-851761.924348779	-720112.4268533142	-814852.0261077672	-889144.5164844077	-876022.9039549491	-758375.1263129867	-897277.0984707696	-1070601.9346363435	-1090859.281788154	-1050467.7091070965	-894659.3492729332	-891281.9783963383	-1074895.9642250626	-1091569.2918446776	-1051723.9824761888	-894387.6917235925	-856543.8549925971	-1049367.1993973046	-1071244.3258431845	-1039973.3951912144	-889466.4140144119	-803375.8757431499	-868929.8302361801	-928679.9741173233	-902282.4479244496	-758320.3231325804	-937113.9432354548	-1111233.9437707677	-1133795.9426400126	-1096288.280691303
176	-643530.2605149813	-801656.2740462369	-852553.8927299257	-851640.9316723672	-761658.4015762566	-894287.9636711152	-1061369.7876532127	-1077479.002326555	-1035894.7790044043	-877675.7597518576	-900526.5533589821	-1084551.902113765	-1094606.1022891558	-1052138.1401735437	-891267.7412614056	-866114.8828239942	-1067196.042360118	-1080703.0771832725	-1045787.6314866713	-891554.3059227841	-720506.9014407274	-850548.6982537482	-889353.3703926089	-873528.1349993516	-756829.7036981796	-928815.8388307372	-1097298.2042260603	-1116096.075098939	-1077456.8678697648	-920577.6742231939	-930736.5823388939	-1115448.2844547997	-1128318.0045888752	-1088964.97318179	-930024.7609851441	-893128.6928161527	-1093829.1390995458	-1109621.1238198262	-1077227.055851772	-924905.2165845188	-797483.5504166165	-899441.1184653743	-926152.7835493898	-895415.273799207	-752001.0074651549	-963343.6514903591	-1133226.5582458419	-1154713.147871323	-1119018.956735125
177	-579623.326392964	-765391.6855591479	-817085.5469322442	-848723.9924351107	-763848.9356039126	-682584.7408391265	-897778.1689286672	-942885.2400386062	-935564.1420952814	-811416.2398490639	-652658.361759579	-870024.2547806174	-910900.4497157253	-905634.4427331935	-782978.4743308872	-637102.1629964684	-850111.6050155902	-886989.5402605804	-883984.5909154766	-766194.5507937697	-680182.5743299591	-827520.5108164857	-863333.2291840799	-875687.3708081559	-771048.1464341535	-742453.7833105031	-954333.2095943664	-998091.9813518565	-989684.8161927882	-862997.7974887969	-711715.4134728232	-925505.7404632936	-965123.4703892116	-958803.374442847	-833586.5703185096	-692095.8359683561	-901553.3913008398	-937304.184451041	-933204.5061767988	-812741.722225466	-780741.825780803	-889649.3342937819	-909580.8498259366	-902650.6849242765	-778247.3608244781	-802322.7632818797	-1010888.1877831828	-1053298.729715922	-1043805.4832163623
178	-642555.3597844796	-692810.0233851674	-850042.2108542525	-848448.9686514309	-754408.929071683	-827827.4423873032	-1019315.3055357918	-1025139.183263941	-976244.6794973894	-820710.5217185407	-821100.9593042041	-1023985.4075033029	-1022656.4462101606	-972710.0172844534	-815436.1659845687	-798227.2234484884	-1008191.6534254941	-1010880.4078493905	-967989.8209264581	-816901.3634449404	-744858.9768435757	-872327.6661285034	-909480.2427068407	-879460.5344077095	-758429.9027196714	-872239.599052056	-1062938.3383043595	-1071718.516502764	-1025864.1497655979	-871013.4199133153	-862247.3271590541	-1063781.693209379	-1065622.8151888864	-1018969.2844431266	-862773.7513436468	-834907.7612960804	-1042985.6105404415	-1048473.7542513432	-1008511.2900337817	-858452.6453858112	-847162.5875507157	-1051845.308846766	-968918.2184531745	-910472.0376807038	-762450.8771616544	-916651.680429318	-1106561.321360418	-1118297.8497415872	-1075483.6199920173
179	-672706.873692299	-779201.2259206255	-813760.5140392926	-802976.4398325254	-708326.6747721438	-969131.345773035	-1102135.2165928741	-1078043.925948743	-997774.930496708	-800258.065107928	-1002967.2938299826	-1167271.1395563318	-1135159.3184432636	-1051064.844421149	-847227.9460089933	-975510.447993085	-1180010.839375691	-1158719.5679725967	-1088619.9427492365	-894293.4357838262	-734664.295217945	-828767.3084285745	-856577.6632594134	-832668.0328630024	-705055.5593648212	-994402.5195119033	-1133292.7586167015	-1116392.1351010287	-1043560.9431223404	-851821.8758336703	-1020531.6679554525	-1189546.401966055	-1164857.3214333728	-1088462.4450454318	-891656.2490626979	-988126.3855051917	-1195055.9609024858	-1180032.3441924278	-1116386.285388858	-929138.0107712651	-796621.7209372582	-878333.3888452371	-899394.7499850814	-862359.563288083	-701784.4450114626	-1019673.6307507717	-1164450.2042472651	-1154740.344308786	-1089346.9641796849
180	-618295.5538637949	-699095.5614320815	-836412.07520096	-838369.4892443597	-746546.7957006709	-769330.8907230776	-965781.6083588523	-980767.9330934901	-940886.7444951871	-792723.7056060429	-755707.9028141224	-961498.6902820371	-970175.1932758536	-929747.0068778443	-780545.4781838129	-739349.8980746676	-949914.055923993	-961175.1938521503	-926410.5493186708	-782813.8981329408	-722189.9791826579	-854496.7963467024	-895055.3758914797	-870741.753779355	-753149.8440853629	-820215.6689084859	-1015364.4197668328	-1032346.5950861732	-994573.1951540809	-846319.2947914045	-803955.9103588257	-1007947.1055295347	-1018791.9354635103	-980688.4590189229	-831702.1395371734	-782813.2544283855	-991158.6082737228	-1004313.0169380662	-971595.2661664775	-828161.4267940971	-826084.3995728542	-1009898.0312418682	-953698.6190430913	-903113.9558273206	-759752.8930861381	-871100.3746717101	-1064947.1785969976	-1083925.2570788562	-1048259.6457805492
181	-578528.480213387	-784097.4537489078	-865385.7209801148	-814824.2769926337	-807366.4495034928	-659780.1977718615	-897317.084612331	-971139.4800243172	-989903.2717486221	-880246.2873251349	-617981.7312902672	-853709.5330556317	-925942.7096872795	-948197.5521459343	-840056.159845474	-595421.8196638379	-819769.2952002628	-885969.6000855174	-904246.3002168129	-799265.3648340032	-682018.1947606559	-846720.4787984778	-918085.8888536	-921164.118737328	-823440.1368103606	-722293.1169694696	-954311.9360457966	-1023999.8656359725	-1038761.5303852318	-924914.3952591658	-681029.0824642783	-911089.9584774871	-979092.2880964073	-997330.1164180158	-884780.4191329277	-655374.8043249596	-874453.0932272671	-936704.7895890465	-951306.2627895647	-841774.0471675537	-785507.9135890394	-909343.5081573277	-970785.9985081997	-1027503.8979876552	-839513.8240890632	-784805.9693859632	-1011306.7164170331	-1076860.251247628	-1087619.780431447
182	-543770.6675486598	-790350.176161198	-825324.6999454377	-810413.9408581334	-715269.0363821823	-917921.6759312985	-1039628.8119610866	-1011669.3573244293	-940933.2419984627	-761501.4156344037	-935284.1321410551	-1069914.1694838745	-1033953.4225705946	-961803.0234129727	-777720.0054262005	-917041.8013781358	-1076255.5873528074	-1048747.820142433	-988075.662933932	-811413.1822143948	-771917.3782361009	-866197.2792613071	-875530.3001976195	-843300.9064717469	-716749.0473395657	-953010.5912773893	-1080720.033003722	-1059276.844544632	-994171.9321516558	-818102.4857222505	-964628.6161183245	-1104696.688519313	-1075608.8208434277	-1009341.6613522421	-829381.181758292	-940594.7503177101	-1103850.1025947316	-1082572.0385958413	-1027035.7758346149	-854476.064072896	-1000064.0889148368	-942044.3823614164	-925735.8362914609	-876187.8094765453	-718229.05746125	-988099.4707178643	-1121811.1915463577	-1106884.3450837894	-1047410.6223048487
183	-607216.8374210715	-749242.6837077143	-832159.3388781629	-836386.9880922744	-747130.6759675923	-773458.4814012004	-957864.7023764652	-984127.3377667682	-950850.2542468793	-803903.521678065	-760956.4570526315	-953654.9059781255	-976378.80927925	-943746.7341086911	-795782.6700715183	-740741.7258104344	-939563.7633019249	-965661.6255604955	-939764.2687601465	-797737.3357745945	-698032.564565752	-808466.5582521157	-876420.3418558078	-865774.0240365043	-751582.7949727757	-822963.1356663649	-1007045.5151449018	-1034562.618609065	-1003012.413785149	-855986.7458032151	-807731.8048721172	-999691.1935638054	-1023688.6760349572	-992900.8603945943	-845189.784477564	-783121.6217623947	-980697.2104545746	-1007724.1971602631	-983283.5161528566	-841448.1543461889	-788848.2892542197	-867690.4334105704	-920681.2860242359	-895160.9987185362	-756034.9139779593	-872467.7175420405	-1056226.265445657	-1084997.8994836803	-1055174.56343393
184	-628244.0558239548	-820526.4833260702	-768699.5406910785	-895334.9705892056	-808857.971001142	-780625.766186643	-1008346.9388469617	-1068924.5192465193	-1046017.7539078555	-909582.3725744189	-756221.8762629797	-987625.1107925633	-1047295.5435647476	-1023157.3903828588	-886471.2598407918	-723401.660987108	-950464.1525304099	-1005436.8322829757	-984325.026439758	-852601.7998740791	-722534.3981455986	-889987.3946945748	-942226.1002781055	-933942.474169903	-812795.5516543887	-829696.2994653678	-1053066.5889162067	-1110997.5962057915	-1088309.5496404245	-950356.1920777236	-804134.2405294509	-1030818.7214322712	-1087778.6239307928	-1064043.6053075285	-925939.5322403008	-768503.8773051706	-990830.5043249389	-1043261.3573844497	-1022465.775675324	-889244.2872213356	-816824.7334415043	-959448.3060168573	-1115752.5903717496	-972549.9081786402	-816733.1392871514	-878766.7702440927	-1097786.17643923	-1153070.6731188418	-1130601.3312752955
185	-640090.1801481124	-799112.0411148248	-850559.2723249863	-850123.8848460891	-760325.2007614872	-883974.233316333	-1052522.0663794037	-1069595.0502197722	-1029047.3224486309	-871948.7586841567	-888835.3431640055	-1073863.0125454504	-1084964.885727458	-1043599.0835251217	-883976.3936792758	-855702.6992730994	-1057147.8772853417	-1071518.9735614606	-1037494.378900492	-884412.9554233113	-718087.9360214497	-848728.6374912746	-887959.9516625074	-872489.6426087683	-756138.0547987897	-919723.0029705528	-1089530.3517002251	-1109165.441916982	-1071434.6969207725	-915546.4730577789	-920387.7958381579	-1105974.5185955088	-1119762.2939511514	-1081380.961186555	-923540.3345906836	-883974.1468772843	-1084944.5023385063	-1101489.405808396	-1069875.1527561455	-918555.6065781625	-796085.6996914303	-898345.22999767	-925360.5665572919	-894855.335908153	-751950.9104293416	-955471.7101247727	-1126538.5744696513	-1148735.833614192	-1113822.0713929143
186	-591572.1821989337	-762885.2480716023	-810180.461553304	-806243.4532590294	-714663.0184878779	-811679.3285329279	-974272.3205250795	-973402.1706366614	-919521.2926539911	-752581.254425622	-812459.8877332401	-992729.550675722	-986414.1569177473	-931471.6570839604	-761230.2538441377	-794769.2190296723	-997761.279379462	-998712.1938920859	-953103.0071990166	-789663.903479415	-676181.4052224274	-822357.9058560462	-859571.6215754126	-839559.5816899455	-719442.2936654993	-856595.1752768805	-1021721.6024130603	-1024955.9856011602	-975107.628465398	-810315.2032827222	-852981.7098360207	-1034958.2950897589	-1032892.5190138711	-982173.9985690813	-814738.2322766365	-829907.9923633243	-1033286.8925599135	-1037844.0193315656	-995790.6060895635	-835141.7989077262	-760790.6264049467	-881830.5660673747	-908962.7197058433	-872875.6476240634	-724221.5697556038	-901510.9594888163	-1069170.8315982271	-1076509.790768473	-1030693.9740739911
187	-576970.6977332269	-752429.7986532033	-813961.4623475035	-822288.7181459077	-735863.2881289235	-694735.2469164102	-890181.7929565809	-924938.2622108302	-903408.4223167083	-766868.2650235401	-674322.0011451346	-877740.5080715332	-908065.3559708094	-886922.2683115426	-750192.8664328019	-664657.2682213136	-872781.5511821932	-903006.670001222	-885327.6400600299	-753381.6133618818	-673704.1342025164	-815333.6928855067	-862393.1451779036	-853435.1162038883	-743447.5022864804	-752885.3038557717	-947003.7887664231	-982000.395580953	-960938.3500984118	-823232.6955819327	-730505.5902247056	-932147.4175436458	-962779.9070436662	-942227.5517552464	-804562.405552271	-716004.175312174	-921926.8940285295	-952286.5450355698	-934980.5373193844	-802051.3234231819	-770437.5738171705	-878237.5855565317	-910824.7647245543	-884581.450969826	-751031.7170867947	-811035.2982951332	-1003825.7220555313	-1039062.5289510759	-1018468.2778801153
188	-596213.1171413739	-809263.5926338998	-888150.6353162633	-916584.0839968584	-834235.3617034953	-719028.4289192015	-962319.2583339803	-1034295.3773882518	-1047901.9914109354	-956611.4446382029	-677294.9044688792	-913956.3456717078	-984480.5143978567	-1001373.4327236483	-912626.8105855146	-638296.3609708743	-856804.7013006746	-920290.3245596346	-933208.8751742449	-845577.0344005481	-696121.1612129621	-863011.1468697074	-923642.5960820351	-929664.5829446185	-830080.981210492	-774155.0830337084	-1011082.8030401303	-1078631.2244771319	-1088134.7142233248	-990933.8691796464	-733677.3384835974	-964019.3010850162	-1030063.3255039803	-1042868.074722577	-947745.7048805367	-693575.3594633933	-906547.1675909129	-966047.9965927213	-975371.7232367893	-881250.353121343	-796029.2022363908	-916758.701105515	-959134.4882113807	-942745.0316251236	-825926.5945810624	-829281.6746482153	-1059846.285206173	-1122967.0837987568	-1128367.4370758217
189	-632211.2692167556	-818155.6523455438	-893870.2158470083	-904870.8721103639	-817350.1982045451	-837541.5933432479	-1049695.7804397077	-1091265.5474078672	-1086503.0914218975	-966127.5982963206	-819943.2040703975	-1035081.8273193896	-1073927.1044345777	-1070009.9846139452	-950262.280422702	-775251.1005505952	-986571.4647696088	-1023145.9370444096	-1020029.4414809897	-904313.0331363098	-718241.4174191371	-867479.4529530557	-925088.3696720261	-917359.3783948721	-809623.6559210418	-878710.5518109404	-1087752.8938135388	-1128122.9579227048	-1122188.9083281283	-999025.1423952105	-859830.7078498681	-1071584.9595115343	-1109250.5545157443	-1104244.6730973616	-981700.796647123	-813850.9509548049	-1021791.9355064697	-1057261.949500684	-1053056.6949571944	-934470.4970807134	-804271.5697937277	-916803.2535116745	-956306.4692545412	-929847.8222228407	-801897.113670134	-919879.431209313	-1125809.94468737	-1164980.3850068622	-1157874.725288685
190	-622343.0026871086	-785458.3330359608	-821443.3324505329	-807735.6013957851	-712160.8425298072	-943235.4565255727	-1078410.3861405188	-1051979.9703502972	-973813.5994141144	-783076.5550004421	-964580.9927119007	-1125735.9055610374	-1092756.570759519	-1012312.9387169973	-815754.7234853841	-934054.6630180004	-1131863.8147114029	-1111331.2090844503	-1044781.9109004599	-856749.0023098874	-693634.1109589143	-838261.3999161994	-867342.9595109046	-839027.7113152305	-711157.5948169954	-972905.4518792026	-1113627.9401953956	-1094221.2585471636	-1022855.5291000255	-836908.7423120559	-987743.024104702	-1153324.5162013872	-1127576.120161519	-1054177.5760177865	-863421.9065544589	-952105.2502350821	-1152318.831001272	-1137998.0049097862	-1077454.1385332122	-895235.5800314066	-764925.2164008633	-891064.4705269273	-913242.5250063594	-870319.7587395974	-710154.3485068082	-1002575.3846836176	-1148845.4468100313	-1136462.5316842706	-1071897.4738456958
191	-649777.0794162382	-834297.9138254127	-860216.2073151192	-918757.2079269968	-832751.3921346582	-861805.1260161286	-1079407.8523873922	-1122027.2864928031	-1116792.3286041892	-990307.7027738667	-843605.4751380337	-1063309.2380233891	-1100397.488613334	-1098538.474392619	-973703.9991239914	-794375.6496345414	-1007955.3181602919	-1038538.011010463	-1041135.6241416348	-923134.300867143	-736651.1525448903	-881323.3886069338	-891541.3644332704	-930059.5744718255	-827037.1400248497	-900893.1372289835	-1114816.4775006573	-1156059.3924187892	-1149792.1324137326	-1021128.9491965667	-881334.5981993158	-1097123.327159888	-1133018.351409456	-1130064.8779772287	-1002998.8386245775	-830865.8896741947	-1040611.0582089926	-1070248.209419298	-1071611.762875234	-951195.7354519262	-823525.2346247458	-928348.8588539634	-922866.4613186673	-941361.8740410523	-821322.8969840237	-939981.0859418382	-1150225.040172812	-1190091.5163060715	-1182791.9182030899
192	-638084.9265143849	-830965.1841731786	-766551.0354678131	-904957.1853072378	-818235.8648239146	-803025.1138715767	-1032221.4930100694	-1094251.0445811742	-1069853.070879582	-931972.5602842561	-779993.374807257	-1013025.0932125208	-1074407.604972721	-1048523.4277096001	-910220.3519054095	-743085.7248630996	-971658.7006084725	-1028100.4865956615	-1005471.4211248346	-872274.5600506203	-730792.3802082354	-900171.7562985516	-952398.477825408	-943724.2379121073	-820957.7669275347	-849558.0461621259	-1074270.2098036646	-1133515.299624484	-1109476.344473898	-970209.2146375736	-825294.8627241558	-1053465.115101304	-1111989.4259806455	-1086658.27739542	-947079.2504877365	-785899.5047950061	-1009593.4795946594	-1063357.5595328726	-1041183.0677907539	-906628.4233767168	-823499.8261404859	-969378.3283728615	-1138245.8499571471	-982491.2202043139	-823679.6767416914	-896090.915952675	-1116318.8640461967	-1172779.554616731	-1149099.6024939513
193	-603227.9236851784	-819277.5119315229	-899358.0320627389	-929397.8139940116	-847252.490823877	-736276.3847946121	-982926.3756110566	-1057764.034570506	-1073893.9922796423	-986154.3706238843	-694063.8302600349	-933082.156218681	-1006687.4650764865	-1026339.887525443	-941274.9390572151	-649944.749511812	-869117.7317998939	-935156.5553684204	-950289.0050436845	-866057.9286214125	-702060.3861228668	-870970.0287770184	-932539.221958079	-939759.2464266325	-840866.6867612824	-789344.5720430248	-1029259.3118590106	-1099318.382299354	-1111007.388315538	-1017001.9854454035	-748581.9930217937	-980945.1675681237	-1049710.1656191836	-1064927.7720974048	-973079.0381686438	-703901.5358766193	-917292.4826743632	-979036.0995947411	-990280.3223363572	-899146.252094123	-800892.8451671094	-922662.545622514	-965720.3425218769	-950120.6299776874	-834480.8758671455	-842412.6967914376	-1075592.185562314	-1140872.743646636	-1148120.784396084
194	-607561.9958718239	-825596.0706553742	-915374.3504208254	-822278.444744051	-865146.1997764356	-720821.5553971312	-974043.1360322768	-1065654.991885707	-1102421.744691322	-1001283.4416817734	-676205.292162474	-924974.5989555658	-1016179.3696471257	-1057939.6931474514	-958399.6072957723	-634768.2964674102	-866798.1993039005	-949571.543992713	-984190.378893212	-887525.8267207093	-707170.9878767915	-882138.1263093611	-965980.3674557613	-974067.3788846226	-881567.2077986322	-776256.3443696508	-1022358.4782975076	-1107995.4758430799	-1138869.2361663328	-1032610.2016679993	-732826.1667301346	-974412.1234809492	-1059463.0860319238	-1095244.8518769338	-990223.70066504	-690128.5804659941	-915642.4613511346	-992692.6235921874	-1021883.6873882972	-919544.4974817955	-806779.9869723595	-938680.189100597	-1016586.3290812976	-1125856.250534524	-897988.2157741803	-831691.06375157	-1070673.7438815378	-1150335.9598004525	-1175316.7134134942
195	-584492.3734385656	-792621.8544151714	-875654.0898529964	-816355.4680848535	-819235.2243793724	-672318.9527569561	-913077.6967146117	-990554.2979711278	-1013016.1515798115	-905109.0243548023	-629941.6711169351	-868348.3817817939	-944478.5911605549	-970740.1342753344	-864365.5715197716	-603504.1404273339	-829429.6947836578	-899034.3355739351	-920667.9404625325	-817395.3073766073	-687184.9328926963	-853995.7626644376	-927924.0896357325	-932031.193827169	-835380.256255237	-733377.924268967	-968289.6546626558	-1041253.7475479047	-1059325.0637623062	-947036.6314284925	-691668.9334410365	-924097.2234367358	-995601.5824908165	-1017443.1827899452	-906439.9549524288	-662513.7196569944	-882913.9698359852	-948205.4796133607	-965803.8603029619	-857749.1935192636	-789877.4972050496	-915369.6758038885	-980194.0317766911	-1047706.8570758769	-851525.2880991397	-794436.8284227552	-1023501.5403942548	-1091953.1971246817	-1105633.9661963938
196	-588286.2032324093	-773900.5128594253	-822411.5000395117	-857371.9847994717	-772357.2971546205	-704715.6184757262	-920206.5567252312	-965006.4440842977	-957942.9513806783	-833506.500799631	-676237.3045068955	-893891.8874102058	-934300.3312425902	-929455.0338788114	-806530.0543992135	-656522.946434865	-869602.8023917255	-905703.3749555962	-903390.253297903	-785574.1230548277	-687155.5489363532	-834164.3136612424	-866816.486900215	-882401.4763766967	-777961.89993897	-762018.5328836546	-974150.3501570768	-1017598.4534612655	-1009455.5326797025	-882524.4889727092	-732660.6949947575	-946697.792961785	-985855.8277268036	-979951.4563133118	-854506.3009413267	-709231.7386456949	-918724.8096511352	-953720.6648987525	-950295.6091726179	-829838.5989115906	-786024.898825573	-894428.1123428867	-911221.4123210046	-907430.9033612838	-783566.5069636649	-819321.384791583	-1028094.0811164572	-1070190.47123632	-1060968.1055531052
197	-595969.127506023	-781446.8138188967	-827134.9764511393	-865041.7083434612	-779903.1850505404	-724343.0309556541	-940097.824743221	-984625.2772587847	-977790.2492541128	-853097.891190267	-697148.9756453603	-915059.5915669348	-955053.1967299342	-950581.0179273405	-827417.458150008	-673746.8330555372	-886889.1376609793	-922300.2835225123	-920600.7293703116	-802761.4603443034	-693339.7342659679	-840056.5634405145	-869905.715311808	-888356.0761712207	-784093.5633122816	-779370.1000580026	-991725.7576209803	-1034898.3355719689	-1026989.767601802	-899842.3032237451	-751236.627078867	-965492.5810634684	-1004242.9218054052	-998707.2477847012	-873059.5724674391	-724429.2123106256	-933953.7814235548	-968280.0980358743	-965453.3509370522	-845001.4612411925	-790710.3458066635	-898666.3106403048	-912676.3928833908	-911670.3791086049	-788283.9464176783	-834397.1066603513	-1043353.6280301919	-1085171.403478107	-1076189.2763250852
198	-639505.0912816608	-825402.5359319763	-901665.5601025388	-912423.9770827119	-824651.8172120976	-857710.2069346249	-1069753.989625869	-1110940.54071509	-1106469.0796031232	-986262.0937853162	-841594.5246393308	-1056679.784401835	-1095191.4576026015	-1091538.8040369	-971902.8576610489	-793111.3759436024	-1004333.3781670431	-1040582.2262301333	-1037727.101111997	-922154.9757113751	-723794.3146743253	-873045.5645102467	-931045.9552725262	-923080.4909123789	-815191.9519518238	-896486.0092157478	-1105415.4165739762	-1145411.9745527012	-1139765.1374360642	-1016768.6760525557	-879027.5796716898	-1090726.3685744442	-1128067.3680124143	-1123321.4270630062	-1000887.62901103	-829599.4824734438	-1037441.3505282071	-1072596.1712221818	-1068646.0251174145	-950201.8540899788	-808083.5425499629	-920688.5930359823	-960426.296815065	-933736.9422887436	-805732.0867265731	-935261.7311933963	-1141076.781022083	-1179883.4261937873	-1173061.1953273772
199	-660342.1729878832	-769916.7540366652	-863443.5888726182	-860368.4179675326	-767388.2980697621	-924023.2470381549	-1087136.8789102598	-1098501.3303777827	-1047298.8070167426	-882644.3764523007	-929734.2739859263	-1105564.4161903472	-1113282.2022532716	-1062319.3139851908	-894894.1723353288	-890274.1450008278	-1079029.8814271225	-1094311.5635192448	-1054375.7750510802	-894594.1499935212	-737617.9677313728	-819914.6060784587	-899232.602913551	-884148.5065529199	-763760.2791905189	-956195.3152938815	-1120991.2660995752	-1135492.872602486	-1088091.6127945147	-925320.0858338427	-957522.9249633395	-1134520.4387752172	-1145386.9687580992	-1098360.6215441078	-933393.1875547615	-914755.083325017	-1103810.7137126073	-1121604.884924425	-1084918.7386880892	-927536.651797952	-814893.758229435	-869912.4591816092	-935021.5608337976	-907928.5347777792	-760132.2603112757	-988367.303956176	-1154845.5908447516	-1172484.4148830504	-1128884.401478855
200	-610015.131870754	-776868.9769765561	-833121.2189727172	-836861.0387280916	-748669.6361840537	-793806.0089553257	-975170.4884868774	-1000669.2650807208	-969183.1435546246	-821880.2093402476	-786624.4429707938	-980414.9428740412	-1000676.1416800491	-968946.0191904258	-820231.4786908075	-764673.743676084	-969301.3686301352	-991226.5587474277	-964990.2669885124	-821979.3962815906	-696940.028412462	-832816.6792049798	-875777.9294103571	-863410.578909193	-750091.2850080405	-840228.5004272759	-1021619.5720638387	-1048574.0878464573	-1018785.6123907237	-871560.9838232117	-829913.0916367003	-1023149.7194045834	-1044963.6314097716	-1015077.4151736576	-866849.9622544472	-803940.1413580016	-1007270.1892356816	-1030397.5167563321	-1005600.8286267142	-863043.8722237193	-783864.930534581	-888764.37866343	-918434.5759574925	-889960.0551850756	-751512.9349723881	-886650.9293992261	-1068068.5931040142	-1096478.9106121936	-1068388.0812268227
201	-601833.1264982693	-749330.1499951442	-801191.5352799549	-803226.8804329736	-713956.1174556201	-763111.6873336313	-937401.0469641238	-949563.8350223658	-905955.3430295731	-746778.052175913	-760419.8013863076	-951118.9024159681	-957631.7963206648	-912771.7394511225	-751221.9468695206	-750198.5587002297	-958867.072709707	-969442.6265726304	-931842.9925343054	-776774.6005152527	-688083.7303061683	-810326.1412813558	-850702.8859087711	-836703.6298688498	-720318.9419190551	-812973.8778698542	-988559.7337140723	-1003550.4047030462	-962997.5334186155	-805220.3088252528	-806286.4348574335	-997565.9198262908	-1007035.0164484668	-965405.8524539055	-805866.7503258078	-790635.3282754726	-998764.1119702416	-1011760.9468921651	-976796.1039148613	-823727.8666785518	-774334.336160493	-871322.1315470615	-900214.1740402941	-870180.3167532947	-726681.7668968034	-862836.0059060773	-1039718.3414247867	-1057536.9744107956	-1020039.7279221644
202	-608162.4376467922	-749610.670194031	-832716.1804216681	-836813.8436643137	-747491.2499165001	-776138.4470871177	-960165.6722998652	-986163.1286389697	-952566.9826646212	-805305.0633201752	-763960.6045104497	-956358.8073391842	-978815.6104385643	-945857.2574042005	-797546.7974490162	-743403.3163270943	-942046.1794857008	-967951.5199973929	-941804.2872383846	-799461.33100984	-698737.1618312428	-808670.3268776342	-876826.3868995756	-866101.079190691	-751799.5471438849	-825334.5913529007	-1009073.683563474	-1036359.1187147105	-1004526.7742861988	-857220.8391276795	-810398.0001150835	-1002091.0760934005	-1025854.8352100668	-994777.9831060737	-846759.7540028245	-785464.621192666	-982888.5595581234	-1009751.2074917008	-985092.5642905314	-842980.4797753614	-789311.8835276336	-867729.9841832523	-920936.5346161204	-895388.2534709196	-756107.8443712698	-874530.663100969	-1057981.6323598204	-1086555.1088231888	-1056486.5558900617
203	-614699.3482394592	-835653.4332057594	-917685.6659645801	-950352.3101733956	-868539.6088199788	-764482.2409796396	-1016625.521788364	-1096142.7024033759	-1116399.124120166	-1034466.3867060342	-721486.3209400489	-964358.8979732845	-1043002.8442248302	-1067167.927594432	-988123.6785530625	-668993.5442992229	-889253.4261379091	-959467.5387240675	-978220.4126956387	-899550.6602301495	-711772.8949482244	-883985.3147675904	-947088.0155545097	-956267.209948029	-858504.7223532774	-814184.1846681724	-1058983.6454203068	-1133148.420051389	-1148411.4355355166	-1059631.5900036322	-772955.8113124135	-1008624.3058543089	-1081838.9553020056	-1101002.3455792791	-1014507.0404532747	-720788.0961714485	-934864.467093612	-1000275.750718476	-1014660.5912308376	-928411.6999172845	-808846.4376988914	-932317.1963294214	-976490.2946761627	-962182.0631071357	-848469.8279182991	-863886.0658567052	-1101341.7065001696	-1170154.153583875	-1180423.7470029476
204	-576191.4958970561	-798899.7221894441	-893412.8424224664	-938155.8405557853	-781244.248363874	-637847.2590264417	-899144.2587744312	-992980.8366112779	-1041741.3936306094	-985094.6410009474	-580236.6662713997	-833818.897570195	-927374.5189486301	-980192.8645241032	-931423.9307158983	-545243.0558984984	-777249.6643754926	-861451.8884983228	-905928.6793508198	-854640.0306346725	-683222.9535871668	-859497.45938666	-934641.0725890513	-965079.1946920722	-889446.2516524605	-702632.645953209	-955888.0774584841	-1043252.5415878217	-1084870.7334064748	-1018784.1874790438	-647418.1784297724	-893037.6006172226	-979956.3573955745	-1025517.0321231595	-966576.5009369992	-610969.519067139	-835982.4182984799	-914121.9087786921	-951961.964436426	-890499.3480666692	-790254.4112772777	-920095.1965505703	-975869.2554762086	-992002.4863283591	-997648.2549410472	-767417.965317554	-1012631.8336092315	-1093524.2566892102	-1128000.0731823402
205	-566588.7349552221	-781016.6340912279	-869534.5172833062	-907290.4521607965	-767054.0824315442	-621558.1586281011	-871933.3473430888	-954971.5552593505	-990571.5982112393	-918802.4497940259	-568554.999933539	-813491.73925751	-895536.3988370561	-934539.6882584117	-869161.5498440445	-543002.4196559226	-770571.2248640949	-844860.9713377324	-877627.2363312694	-811130.5344414298	-674163.6940977531	-844201.9146008168	-914122.8994128585	-936542.2450880248	-854022.8401059636	-688294.4242925342	-931765.5160212446	-1009509.9536854984	-1039347.519915151	-959666.5293980594	-637033.2155850515	-875062.7911439885	-951693.4294511419	-984866.6284934339	-911012.1991038974	-609009.5814760936	-830415.2521761046	-899746.4029961749	-927166.5629879162	-852176.6472157629	-781738.6532402842	-907387.1950847325	-958711.2307750636	-965793.9755152529	-940991.5977803831	-755030.6235546409	-991597.6221737271	-1064048.3599162993	-1088123.4416190626
206	-636450.5291727888	-822367.6310750245	-898400.9667279449	-909260.8305118794	-821593.9898404644	-849263.8420087345	-1061353.860693923	-1102700.8978346142	-1098107.5716828788	-977830.0170970375	-832527.2204429315	-1047634.8281709293	-1086286.2105484891	-1082522.8017992638	-962840.0526380927	-785631.7143911228	-996894.9093968875	-1033280.1248363645	-1030315.5410213423	-914682.9917153997	-721468.8302576202	-870714.546107953	-928550.9924020706	-920684.5600326479	-812860.0187191161	-889041.8683834887	-1098018.5713683998	-1138171.5490764964	-1132404.4309405936	-1009337.9044893169	-870988.1681321692	-1082710.1841496404	-1120187.1201800474	-1115332.3193900748	-992852.4218718179	-823004.1930327169	-1030887.5698455916	-1066174.389579756	-1062117.4072286913	-943613.757120511	-806487.1356952805	-919061.4610898718	-958700.9641911705	-932108.2270987583	-804126.0476317742	-928819.8149716172	-1134683.2195428766	-1173642.2176050043	-1166701.290254986
207	-570643.0475769332	-772826.5297598296	-851808.9301194862	-812799.7430589505	-791673.609067339	-643201.5126668805	-876478.4746055104	-945469.2955846874	-959343.5266187381	-847372.88892531	-602168.3529686913	-834354.1135088748	-901434.6510758797	-918391.8520568296	-807914.3657267904	-584735.4117218426	-806996.3585832078	-868695.4659390391	-882533.6817898076	-775294.0368399133	-675186.7569813213	-837101.1313906629	-905077.8642961027	-906795.7212257071	-807652.9649079045	-707636.8349154525	-935830.6597380284	-1001186.8610436913	-1011572.5196015022	-895664.4746964569	-666961.1196468147	-893891.8116046289	-957263.773750629	-970736.7110701815	-856142.2788790964	-645935.7627756497	-863266.1604596373	-921498.6292780943	-932137.6049571817	-820651.7809468786	-779730.4699037744	-901375.7365627062	-958346.7394907842	-1000791.6368970927	-823632.3207253249	-772072.0911459593	-995182.7753344164	-1056904.4265026953	-1063801.505524991
208	-581371.5447634165	-808546.4551229515	-906293.6057588563	-954805.6583669013	-788898.8961674038	-646634.141941007	-913822.7300772519	-1013484.3080577536	-1069344.0843941867	-1020854.8553799153	-586538.1459018069	-844784.043324812	-944549.0606236733	-1004819.7073033096	-965010.3312735851	-546451.7296641566	-780852.2369303672	-870401.5814199903	-921195.4196891238	-878110.5010334363	-688109.8196804136	-867748.3853347488	-945709.2581187043	-980472.9751205579	-908554.8188588629	-710367.159944434	-968900.5899831181	-1061454.4165767157	-1109427.4699395597	-1050674.2198956793	-653020.1730370356	-902733.8111132311	-995202.32142044	-1047445.2128323043	-996549.7347250826	-612026.7746375034	-838985.5330001506	-921876.5350661881	-965337.4292576688	-911171.8884226196	-794848.0945974108	-926950.3155091235	-985124.8650806247	-1006140.2293742144	-1028210.7415503219	-774100.1097596443	-1023978.3873515618	-1109424.536472111	-1149510.8554849327
209	-573814.1214369526	-777288.1227572586	-852364.2697173756	-875668.5318185387	-792670.3352939147	-663953.9393875424	-896518.6224237268	-959357.5515007888	-964906.8707084709	-862277.8563749925	-623750.0070553359	-852885.6738563031	-913571.4465920948	-921652.9856424744	-821150.402423684	-601101.8634088086	-817487.9338975856	-872820.927086224	-878670.2712672793	-780179.4416357087	-677156.607819534	-837597.6218436593	-895234.7585262927	-897431.2886179326	-795641.118786248	-725653.4890200387	-953043.348863726	-1012575.0109090041	-1015099.9233790066	-907695.7042191651	-686085.2501070751	-909973.2759692442	-967328.9529168172	-972429.2017965639	-866853.7772193011	-660602.8206373255	-872236.2760654107	-924575.6535517334	-927767.0394718321	-824106.9149217394	-780499.092256491	-897907.12093006	-938105.1809183606	-919193.9907254245	-798611.8983617323	-787352.9761525352	-1009568.0127781248	-1065792.4781253175	-1065292.9760751426
210	-600372.6439562185	-848067.3524426586	-948388.9112376064	-990310.0656620291	-882363.5795956403	-688892.1834611229	-977293.6870834882	-1093157.4187698597	-1158082.2256547762	-1107222.0947079263	-620553.2365754773	-892122.4172614422	-1009430.5270478713	-1078221.4113789375	-1031413.3048176856	-560884.2700358148	-796339.8150128076	-900021.7553008862	-953915.3340180104	-898652.6592500622	-706864.5151742591	-899179.5581443649	-977672.2361363188	-993691.159005384	-872432.6121760332	-747550.203714687	-1024879.4908046271	-1131510.1199459746	-1186927.4914460517	-1125095.1404382633	-683526.8825756852	-944427.8553812782	-1052292.6891471215	-1111522.1374566783	-1052874.0483829216	-625333.3319709154	-851871.5190778988	-947115.8158751108	-992609.6560317519	-925621.0348998023	-813356.3788531362	-950291.7637967955	-1006955.5060249191	-997072.2049270659	-862501.6523448654	-806208.161468251	-1072465.232025766	-1169862.8210728138	-1215772.7271792244
211	-606674.8592384639	-824198.151472922	-904865.1225382878	-935694.2244825371	-853648.847571075	-744751.6851407009	-993052.3006454132	-1069296.063048302	-1086665.9413470766	-1000671.1732316581	-702303.7448092098	-942480.1967702042	-1017599.5162280373	-1038607.9037791213	-955352.0560735655	-655668.534529904	-875168.1085752782	-942461.5236805417	-958681.839049022	-876121.830171959	-704978.8023861051	-874880.8640708216	-936910.8458717137	-944719.5620443652	-846166.566622278	-796808.3829657501	-1038190.8845390502	-1109483.637655801	-1122246.5626298736	-1029811.3360957049	-755905.8419856005	-989262.1996325811	-1059364.2296735407	-1075767.465922343	-985527.3311684176	-708975.6123156458	-922572.5154680135	-985418.1934882551	-997606.1095786822	-907939.9387114345	-803282.7419706336	-925563.5766687212	-968956.4995320311	-953744.8514055271	-838684.2785003724	-848865.0182907992	-1083329.405885804	-1149671.2265626336	-1157827.183959554
212	-594001.0550578382	-779513.7390578903	-825925.001778175	-863077.0174192046	-777970.2161006765	-719315.2357626741	-935002.4398153606	-979599.6797569522	-972706.1278018458	-848079.3234839754	-691792.2023195501	-909637.2323377465	-949737.1033607989	-945169.3458001668	-822066.9012042327	-669334.7296035714	-882461.0372447948	-918048.7879575007	-916192.0611898144	-798358.7194383116	-691755.581627176	-838547.1935657866	-869114.372704946	-886830.7345983749	-782522.8647973941	-774925.2897133343	-987223.607923355	-1030466.7649711949	-1022498.1647405452	-895406.1390919054	-746478.181097609	-960678.0725098138	-999532.8489256608	-993902.7286817974	-868306.9312576804	-720536.1986433315	-930052.6991413282	-964550.5260398614	-961570.515068718	-841117.3136791768	-789510.1128247266	-897580.6457291278	-912303.6823039944	-910584.3869634388	-787075.518183222	-830535.2811639946	-1039444.713561798	-1081333.8594723118	-1072290.1923619215
213	-586375.7271159544	-826472.5039557322	-917002.8144604604	-948815.2675520597	-877445.8134390262	-672425.074987882	-946156.3620235578	-1044568.882689835	-1087898.4464169359	-1018331.1617748266	-611499.3659943035	-868763.4351838408	-968181.9673119192	-1016142.444724617	-951282.8431354465	-564428.3738185	-788485.3791879058	-877090.6339312947	-915545.28187548	-848278.2921642169	-694082.8133818498	-878907.2910603076	-947582.7918526118	-957014.6621279906	-871583.2408487346	-732990.9206839147	-997061.4750664819	-1087940.7734586124	-1123917.4659548074	-1045413.8145880417	-675672.3515664098	-923654.6637757276	-1015398.9380277058	-1055947.6401848851	-981220.4262574862	-628935.2383502005	-845305.1710009833	-927142.7234675848	-959138.2106719665	-881904.7924938131	-801789.9027571704	-931342.0719864148	-978162.7006066773	-965213.9757088994	-865720.6806153791	-793556.7039203295	-1047966.5379663421	-1131312.6519108359	-1159936.4977688505
214	-601857.9963156788	-857863.1160245223	-954985.7189431238	-992017.384138765	-924444.9856937476	-703830.3095336546	-995423.5158279273	-1109202.1207592506	-1167987.2288385327	-1114194.032840177	-635943.1987210431	-905515.2167578128	-1021606.6214984731	-1086041.9637347362	-1037942.654584235	-573037.0108378133	-800487.2002173221	-903258.1017277618	-955111.8859596015	-902821.217604557	-709060.9524683938	-904515.4767124851	-978042.4574695996	-991631.3867385546	-912219.6334517029	-760611.6066764875	-1040587.4655195588	-1144989.0905187984	-1194568.9801073617	-1130007.2272910716	-697540.079527263	-956069.0907523436	-1062591.8104455827	-1117717.9356478702	-1057642.476904517	-636817.2964871483	-855297.0319370169	-949658.5764551798	-993431.9734800507	-929056.5483517637	-816263.9126547446	-951167.8293855612	-1001099.1255335736	-991245.3028460689	-899994.2972394315	-817392.8413717052	-1085751.3687409637	-1180776.0443009576	-1221150.7473011941
215	-670143.5380537966	-685662.1284381187	-865542.36009153	-859911.3222932257	-763349.7234756354	-894349.5448612138	-1080193.664825294	-1075598.0353972604	-1016453.6167520757	-852537.0447594303	-895465.7463071239	-1095045.1142380065	-1082337.969074871	-1021567.4233972306	-855113.7511282163	-865182.3406387954	-1074464.7618846213	-1067405.0275909367	-1015273.6434423644	-855665.5263921296	-770638.0927483282	-892604.877572222	-925884.1578294275	-889375.5054941445	-764434.3695052672	-931401.0558157132	-1117039.2552644655	-1116492.147025518	-1061448.1291618878	-899095.5046709359	-928536.1508830969	-1127276.6182529458	-1118878.7506484126	-1062502.1238876116	-898108.2947622782	-894149.4776979716	-1101923.12151531	-1098693.2117971429	-1050492.0812559072	-892899.7279896557	-871132.6394723431	-1099547.6266748628	-986225.9010902793	-918839.6262160384	-765519.0165312138	-968452.488224304	-1153884.7992495457	-1157386.2586537753	-1106442.6415192625
216	-595390.5346674054	-808089.3229717896	-886836.4140209368	-915081.4980515435	-832708.9244156033	-717005.8690486907	-959902.7906231054	-1031543.3547964457	-1044854.0720927814	-953147.1305485955	-675328.5174592093	-911713.5815330048	-981876.4442336325	-998445.7727762442	-909267.423801907	-636930.4273269572	-855360.8292527641	-918547.0546859871	-931205.9952094201	-843175.3680777374	-695424.7054676273	-862077.858584641	-922599.3444289225	-928480.8449171957	-828816.2090032953	-772373.906693409	-1008951.3575756005	-1076205.370912316	-1085452.5788396103	-987877.0242851102	-731929.562899607	-962034.5106223294	-1027759.4634877279	-1040281.2720319724	-944775.0233884852	-692364.4733630305	-905287.1317211108	-964524.9630161225	-973623.4850987669	-879151.8130177783	-795458.8732601793	-916066.3941974922	-958362.2062819939	-941880.1413531019	-824923.4875360728	-827741.8818381274	-1057999.861988521	-1120867.39909844	-1126051.085626014
217	-598811.0702242446	-811066.3594164944	-890769.4600217587	-887539.013942814	-839154.7306777441	-713435.5782081708	-959604.495522165	-1036364.2793602439	-1052449.0441489648	-962633.2703306213	-670380.1871407535	-911191.7463868561	-985810.9250321584	-1002997.0979057607	-917797.7809086938	-632094.7594364301	-855766.0419149654	-921626.9718043922	-931727.0982439562	-849569.1490412005	-699285.8003157421	-867111.9871524861	-926704.8468609407	-902946.3442597379	-836560.4356405474	-769494.8463081215	-1009108.1335908443	-1081053.918989136	-1092869.1434325096	-997097.8747078101	-727589.1003727255	-961838.2171752476	-1031606.2601405417	-1044647.0451434915	-952969.2634902834	-687916.5261162639	-905734.174828392	-967248.1852719677	-973772.4538229197	-884957.5177329119	-799760.5303676045	-923157.6148488428	-962640.1712001227	-918353.6060124789	-833966.1406033507	-825554.0518684367	-1058611.697031158	-1125743.5707067586	-1133289.2185385933
218	-590312.2571013104	-776526.276075436	-849090.2334865831	-861482.4217300969	-775406.3969248538	-721683.9568808998	-934472.3568044024	-978243.4890665875	-971809.4269401208	-850465.9516418291	-695568.2282675145	-911013.3955131895	-951775.0443643116	-946338.7107870413	-825949.0191687058	-672653.6025011932	-884539.0025008355	-922984.0074908761	-918366.081901318	-801820.8470830361	-686343.0646350166	-835505.1912428894	-890865.3040374521	-884494.7210791663	-777636.8456067777	-776600.2866393859	-986291.3763068732	-1028807.028524066	-1021223.1005823349	-897098.2616645964	-749555.1955212567	-961628.0503496744	-1001158.269064401	-994659.1720504152	-871482.9555044901	-723384.2646238027	-931894.6191529033	-969175.2459901408	-963504.5332178026	-844102.4688976494	-782373.8745557622	-894484.1063823696	-932640.31681267	-907506.9579531007	-779867.2943073502	-831516.5444180932	-1038110.3333093439	-1079370.5774613232	-1070636.7742556303
219	-616492.7080642642	-838213.5266944469	-920550.8761368451	-953628.1850587961	-871867.4834025514	-768891.7412180016	-1021893.8033865773	-1102142.546685603	-1123044.0700403643	-1042019.1390505304	-725773.3554621277	-969248.4783255844	-1048680.1288270196	-1073550.6890761282	-995447.6727838619	-671971.4955659596	-892401.2954456378	-963268.1426198799	-982587.0076286603	-904786.6724626204	-713291.2785668448	-886020.0307606558	-949362.4690726197	-958847.9459698311	-861262.1256966449	-818067.4306534352	-1063630.5334659626	-1138437.1642948831	-1154258.914656528	-1066295.995091274	-776766.2383690235	-1012951.4628131313	-1086861.738685546	-1106641.9843593836	-1020983.5957030286	-723428.0192837521	-937611.5444727521	-1003596.2046723805	-1018472.026728357	-932986.849074448	-810089.8450230536	-933826.5348268646	-978173.9913624089	-964067.6606195957	-850656.7598447528	-867243.0575888688	-1105367.200992106	-1174731.7981428928	-1185473.7593259336
220	-625837.1755608	-817973.3857565316	-769225.0221225327	-892981.5692062172	-806564.3256254394	-775147.333480192	-1002507.7001236358	-1062730.1573978723	-1040188.1118172349	-904106.1802147791	-750407.842884056	-981412.7828091742	-1040664.4752833861	-1016953.3646907469	-880662.706638913	-718587.3324249134	-945280.3897252365	-999893.755458563	-979153.0409919778	-847790.2359708219	-720514.660800673	-887496.5034199561	-939738.1400642018	-931550.0502848042	-810799.236951904	-824838.5132368897	-1047880.6070832105	-1105490.2160526586	-1083132.5747241222	-945500.5395987476	-798958.7753172072	-1025279.8662162756	-1081857.145695579	-1058512.508556202	-920769.1797157131	-764249.2545398098	-986241.4556243328	-1038346.22803899	-1017887.9001611035	-884992.4750066835	-815192.1391947847	-957019.6210383427	-1110251.1886916363	-970118.461972592	-815034.1550790918	-874529.6304935875	-1093253.451497747	-1148250.274662407	-1126077.0238944492
221	-605755.0957330602	-865764.5634432703	-964546.5367418786	-1002891.9491787972	-936275.3217025376	-711735.4376303313	-1007824.7338864829	-1125471.1928942495	-1188146.6733803921	-1138324.0317542846	-642096.0465399944	-914766.1440419217	-1035054.3394019909	-1103636.6309825075	-1059756.1172201552	-575203.9227988203	-803508.2231137645	-909844.8121245666	-965071.3426603498	-916550.419714	-712831.1554247321	-910961.40812589	-985709.5729032794	-1000344.8909136325	-922448.3705893005	-767564.1120166765	-1051543.5540520232	-1159348.9340475358	-1212352.9348422352	-1151300.5490326378	-703044.4864585937	-964228.2464197549	-1074470.9034410417	-1133266.3658782756	-1076878.954788323	-638801.318582166	-857812.1203216747	-955326.1253414479	-1002064.1837416819	-940925.2917453869	-819907.2193826764	-956158.244331371	-1006872.5381429478	-997797.7447724586	-908621.4364303404	-823392.7239584277	-1095262.3286718405	-1193226.6583019516	-1236559.2131475427
222	-658470.1124407522	-688686.6275239112	-858983.7596161342	-855061.2400847634	-759566.592259895	-866201.9518135001	-1054434.1169612522	-1054247.308605959	-999439.9512088101	-839070.2422176739	-863999.6668569288	-1064977.518162811	-1057084.840331345	-1000894.3187675524	-838324.9173691298	-836851.5254503568	-1046422.5260330696	-1043487.6838135691	-995266.3715068445	-839263.1902828543	-759730.1382996336	-884024.9518838528	-918943.1455930675	-885180.1694954023	-761893.6908245875	-906367.9833907036	-1094147.456336456	-1097547.0162440995	-1046391.4286996947	-887213.0916940023	-900487.2654088628	-1100409.9191521117	-1096344.4899599752	-1044082.0108225534	-883157.1385046348	-869082.4448966185	-1076984.807594514	-1077443.7803825168	-1032728.6885909677	-878324.0843049983	-860990.1568728621	-1079363.2762150355	-978902.4764035856	-915299.0364252139	-764220.7902999864	-946533.9378007372	-1133860.7478788295	-1140846.7238822398	-1093342.9061426474
223	-629954.2398923646	-758091.0919629055	-845548.8558675079	-846650.9312202211	-755800.8462721003	-837899.5176366882	-1013192.6071290364	-1033078.8874275663	-992129.7970244337	-837604.2500938666	-833192.5965686322	-1018671.4867876421	-1034972.8400279343	-994495.260060512	-838201.9431445822	-804740.922452914	-999254.62878236	-1020723.2150274687	-988817.4731978065	-839191.612599131	-714974.9374310147	-813366.270755782	-886183.8860370544	-873638.2191464262	-756794.7029408381	-879985.903767447	-1055813.779320699	-1077760.3091665609	-1039425.9247620038	-885661.1006121896	-871841.7243258331	-1057397.4984852509	-1075774.992896624	-1038037.1594541513	-882940.4406137827	-839460.1457887469	-1033389.2310011236	-1056464.614585862	-1026782.9300461912	-878293.6404748915	-799995.6317476761	-868641.4503541557	-926818.8585480629	-900625.446196344	-757788.5596095757	-922072.2144254618	-1098434.8890547561	-1122441.73094795	-1086722.0395268302
224	-627051.2760388168	-789468.6590752974	-842999.0814512715	-844373.8365949912	-755271.9823106537	-844882.198606825	-1018986.6320372199	-1039712.5810447321	-1003093.4725667572	-850241.7606515634	-844522.259631987	-1033349.0154137623	-1048421.8736933088	-1011233.577795976	-856340.06783452	-816237.4983446484	-1019062.4121473205	-1036708.5523841113	-1006060.5419858675	-857345.1621036314	-708919.3542495153	-841830.0783809869	-882678.4898161876	-868553.4547134335	-753516.5045108083	-885258.5131277128	-1060087.9336698286	-1082896.3284548193	-1048608.9192761756	-896476.7588202213	-881162.8881498865	-1070066.1933764548	-1087333.664763718	-1052635.352182187	-898962.4744989699	-849275.757906305	-1051269.1475738857	-1070667.831866106	-1042009.3039207716	-894488.7397684029	-790787.4392960195	-894191.4942935575	-922357.833977785	-892733.0086105326	-751761.0281078644	-925634.7651486007	-1101189.1727573755	-1126080.0758649064	-1094124.3659855938
225	-576100.9697462465	-798731.136598287	-893187.7391552164	-937864.8695713399	-781110.4763050897	-637693.7001106108	-898887.73889574	-992622.5194609636	-1041259.0110486534	-984469.698139718	-580126.5420795123	-833627.2714941018	-927074.3779287535	-979762.4876413925	-930836.9772642078	-545221.9332051779	-777186.7060840133	-861295.4843268511	-905661.8789259801	-854229.8624301432	-683137.5510768129	-859353.2668151293	-934447.6457974717	-964810.1741240139	-889112.3117454619	-702497.4781588365	-955660.6717521661	-1042934.4469669462	-1084441.5816953355	-1018226.8796315026	-647320.2783864071	-892868.1503598432	-979689.9200560516	-1025133.8168591595	-966052.690920501	-610951.0425469987	-835929.9360881001	-913986.3895033177	-951728.2158026209	-890138.0762805993	-790174.1324073793	-919975.396998738	-975707.5051274186	-991755.4161766879	-997114.147185834	-767301.1886555761	-1012433.5420753587	-1093246.3845759009	-1127624.1523420173
226	-582898.3742073089	-756813.8211421438	-817398.4356702645	-824902.7741629751	-738160.55512915	-712507.0575324838	-905427.4917923108	-938523.2696647989	-915207.4219923756	-776736.5837474284	-694467.3769025581	-896158.7635978792	-924678.3436046774	-901636.1004920896	-762756.7442837965	-682598.725657274	-890095.7605521488	-918831.9964961652	-899617.9219738382	-765687.0280134085	-677872.305546874	-818469.8787336688	-864794.174963288	-855224.56477941	-744639.2973819448	-768553.3649075433	-960388.7425352331	-993942.7186902734	-971315.2823936684	-831902.0665279808	-748337.8068399073	-948471.8672704389	-977522.436071396	-955295.7259514868	-815735.8601484334	-731778.5703278707	-937236.2027343352	-966298.4832491226	-947648.7596781952	-812992.4730011876	-772846.2404686145	-880125.9345470936	-912189.8508637194	-885546.2919938072	-751118.0403667596	-824599.6097826028	-1015349.9307545419	-1049362.1677157476	-1027423.1427949611
227	-580191.1591920261	-766470.3112242533	-838273.2102928831	-851001.5360896231	-765274.4797744056	-693697.4621410528	-906639.0620994426	-950941.9547194504	-944104.1005091248	-822526.8000715316	-665524.2906181633	-881043.5064307922	-922268.0727826068	-916464.7589258567	-795919.9892453408	-647870.2181067239	-859892.1077792548	-898788.9574261885	-893808.3473834358	-777062.9017853383	-678637.7194401602	-827781.5095376021	-882598.4027298745	-876555.9559949003	-769910.1326689079	-751934.5978995953	-961782.3986278748	-1004816.3377023926	-996833.8662283237	-872476.8711501835	-722917.1150290692	-935066.9314296601	-975047.5674259709	-968187.7702312475	-844858.8060261945	-701531.1911584486	-910179.0823261782	-947897.0796152429	-941872.3717134903	-822273.2272298585	-777084.2816441092	-889092.7078280313	-926923.5365377496	-902110.3134205505	-774545.78557869	-810171.6633909039	-1016925.6726563071	-1058690.7284525686	-1049563.631972989
228	-595068.6419076459	-765450.206718368	-811460.2510965085	-806413.0046637962	-714378.6985613143	-826627.9289817602	-986105.4320505762	-982330.8929241793	-925690.476967837	-756046.4070628714	-829745.2673872232	-1007842.9390573513	-998497.746481693	-940657.576716464	-767425.818610205	-810596.0944651985	-1012999.2257255621	-1011508.9878289351	-963520.3957458768	-797286.7208562172	-678164.5399405636	-824165.0050924945	-860454.6714760377	-839499.1457540184	-718500.9110418628	-869811.4038140909	-1032164.8340829705	-1032826.5341346881	-980533.1779988831	-813337.0023850199	-868294.5126198991	-1048408.1386890992	-1043651.3285365405	-990355.69809605	-820270.1128987307	-843793.1531060451	-1046812.3810001734	-1049224.4235484686	-1005069.95731681	-841970.1993569072	-761260.4360201411	-882879.8060416331	-909449.0300010184	-872585.2243476377	-722623.1244905887	-912994.8161124503	-1078224.1840105322	-1083322.1649500292	-1035375.8894250966
229	-569113.1495064723	-787897.1180824931	-873096.1852447462	-901929.8311677043	-805242.1279162844	-631124.176088543	-884160.6892292339	-967315.89250388	-997429.6137277044	-912617.5697206925	-577370.2934078582	-822585.8658977605	-904898.4483146803	-937617.8621430687	-855598.5174986009	-548860.7538721962	-773524.6495119643	-847531.643795449	-872798.7668146698	-788024.3019165009	-676982.1167125258	-848837.1753725854	-914965.4552478748	-921252.9903162572	-807361.4066774829	-696707.420572582	-942453.1598634336	-1020113.5163114568	-1044686.7997587943	-952781.3028587118	-645010.9014492994	-883016.9606680266	-959737.8623450671	-986932.2825618645	-897361.4776220515	-614493.4471783639	-832864.322652754	-901836.1375142392	-922201.4913312525	-829904.5016318272	-784851.0799455526	-909777.2326367104	-956834.6666980628	-940576.0949108638	-809480.6894376758	-762290.602556621	-1000745.5679976334	-1072911.140093066	-1091943.969949712
230	-661568.2126881746	-770393.8753709489	-864165.5745707378	-860921.867367581	-767855.8085083461	-927498.018127437	-1090120.2543352335	-1101140.881810744	-1049524.6706930818	-884461.5774724558	-933629.370400489	-1109070.2216292187	-1116441.692788247	-1065055.7614587648	-897181.4922220545	-893725.091342192	-1082248.5151701882	-1097280.5787677052	-1057020.8078837888	-896829.4356290689	-738531.5295059062	-820178.8069719906	-899759.0699449928	-884572.5574280265	-764041.3141984174	-959270.0806546435	-1123620.9344651378	-1137822.1660937394	-1090055.091698536	-926920.1778901921	-960979.8416684016	-1137632.0616125283	-1148195.5522097484	-1100794.44812747	-935428.7676168855	-917792.9530728625	-1106651.9577447784	-1124233.0517455034	-1087264.3016185942	-929523.4235423215	-815494.8420369182	-869963.7396447122	-935352.509260608	-908223.187148753	-760226.8198884886	-991042.0634221632	-1157121.5521514465	-1174503.450433139	-1130585.4954443034
231	-648058.5995681264	-768812.7464491004	-809389.309662686	-803063.5373660419	-710284.4666474452	-897482.4035733116	-1044844.4265417813	-1033361.4782719996	-965842.1704626932	-781658.9353722895	-918614.8034005504	-1092098.3173969067	-1073419.29194398	-1002969.6540899212	-813839.2473999526	-897152.1075553813	-1103102.076999791	-1092893.361207501	-1034096.4922722888	-853423.0630275612	-718464.6362714373	-822353.8907526339	-854534.5495778313	-834071.5215339556	-710363.8159782173	-931305.7725468125	-1082957.9108929844	-1077148.3528316787	-1015542.8251961202	-835614.9128365701	-946022.0583430221	-1122779.965342956	-1109970.320390137	-1045666.1664928272	-861820.6164686822	-919443.4964469307	-1126790.1291611919	-1121511.386967468	-1067840.0014087737	-892478.7648596197	-788870.6764216538	-875895.0333372741	-899679.726997536	-865079.4431152407	-710443.1661752751	-965129.0790203135	-1121071.3048862598	-1120935.2274369518	-1065243.4868598336
232	-606743.6657648011	-792851.9424662244	-866651.4635241957	-878497.938886191	-791855.3704192144	-767119.4952237529	-979659.1778239913	-1022567.0073270542	-1016788.4939171831	-895824.6292554149	-744343.9857793625	-959668.9365944219	-999679.0477468142	-994838.4996265789	-874700.5742728586	-712888.9525294094	-924552.764158533	-962264.2079997368	-958235.093675493	-842014.8972247351	-698852.545021903	-848044.4406033647	-904286.4600210285	-897383.1541871363	-790181.0161153106	-816644.5600257915	-1026081.2322866846	-1067755.4557148316	-1060818.5555667975	-937070.6177302949	-792801.6091515978	-1004749.5183412031	-1043548.4932235759	-1037634.9860465641	-914706.7524005199	-758862.3109662978	-967149.3773960465	-1003719.9416792289	-998623.9332214255	-879541.8247731165	-790961.427366129	-903236.9387043277	-941921.4001277944	-916268.3070202391	-788506.661835525	-866169.5500677675	-1072503.2242493778	-1112943.9163626714	-1104848.6172566088
233	-605078.3112841065	-821919.0148681012	-902314.3542116743	-932777.859749327	-850686.1898357584	-740826.1045138119	-988362.1854257744	-1063954.6703267968	-1080750.2435217043	-993947.295993756	-698487.1899261265	-938127.222313458	-1012545.2839470635	-1032925.6170200421	-948831.8319416458	-653017.3978548634	-872365.7014764207	-939078.0162040974	-954794.4550943929	-871460.4429237801	-703627.0534360572	-873069.4475265816	-934886.0017431716	-942422.0483165818	-843711.7738883821	-793351.3029373668	-1034053.968176364	-1104775.305459283	-1117040.8137892503	-1023878.3146448418	-752513.5893889301	-985409.9255405465	-1054892.6705222453	-1070746.7480311801	-979761.5440172516	-706625.4069712902	-920126.9154777243	-982462.1420063832	-994212.9592122231	-903866.888269065	-802175.7921034812	-924219.8801850621	-967457.5797597667	-952066.1883677918	-836737.3509261037	-845876.4388609219	-1079745.6883811045	-1145595.9545757247	-1153331.3841026456
234	-608193.6850789681	-775521.8616721848	-832065.1113967439	-836057.7958441969	-747963.7357143277	-788345.1158764928	-970485.8149298282	-996494.8860720803	-965557.5661130259	-818847.8884032768	-780434.2046534498	-974755.4112539468	-995571.329843574	-964424.7767546559	-816370.870726769	-759160.7217981897	-963981.0865183994	-986363.7781454138	-960599.1723902442	-818198.2084693643	-695659.2394969417	-831852.9971152847	-875040.1448806694	-862860.7200595745	-749725.0721483151	-835414.044095012	-1017506.6652263957	-1044904.4702131313	-1015597.0055022713	-868897.0736105803	-824433.6371006425	-1018133.5690271892	-1040433.5710534449	-1011061.8478483628	-863416.6012880835	-799093.010898144	-1002565.9697411504	-1026091.9511578435	-1001708.1578519212	-859681.8935657333	-783124.7993611039	-888184.129855036	-918015.1145075356	-889663.580403532	-751486.4096952351	-882482.9098135312	-1064527.452987062	-1093314.0543541822	-1065636.4448915168
235	-582708.3737721328	-814066.0579403942	-905842.1241495312	-940367.724350323	-838783.4071253809	-656248.3513010737	-924665.63067662	-1022046.2648798442	-1067299.8508015606	-997254.0044067069	-596151.2048445055	-852828.3578859041	-950361.0214736313	-998768.460323168	-932063.0126830955	-554089.9618803096	-783447.3081186407	-870360.3827180562	-908077.5818499811	-836138.2383241833	-689978.4212220631	-870731.8347680006	-942237.5773395023	-952757.4393183241	-835661.8525919834	-718819.71161486	-978301.6108466252	-1068561.5745895219	-1106549.4158129268	-1027723.1823486923	-661762.0809050954	-909725.4823724874	-999991.3485064055	-1041118.284233905	-964996.2334886994	-619207.8761018892	-841130.838238178	-921528.9506204352	-952823.061068271	-871533.0614859115	-797248.4631480002	-927397.6115595025	-978632.9735173619	-965147.1028343118	-832540.3036186837	-781391.0094286462	-1031937.5285166302	-1115076.8842630952	-1145798.9588005287
236	-653249.4578046089	-847050.9565204566	-763240.2435968152	-919784.7733086481	-832686.9605435369	-837541.938605297	-1069011.5733836147	-1133278.575578356	-1106582.68773977	-966475.269729468	-816624.6490948829	-1052165.8197087194	-1116186.6016181605	-1087611.8456810329	-946817.0983781102	-773418.3663494387	-1004318.959809367	-1063024.6011163169	-1038057.4771726101	-902589.7828237785	-743517.7204065109	-915865.5983449316	-968073.8527454393	-958797.6868993484	-833535.5329404075	-880164.4923533543	-1106944.4499729401	-1168214.5075318506	-1142093.8366311823	-1000802.2171558504	-857902.8430021876	-1088362.6314093617	-1149297.655790376	-1121506.9115542327	-979655.0183150186	-812705.7240494895	-1038506.7469798382	-1094325.2956083785	-1070025.9385977772	-933416.9347772531	-833785.9741128691	-984680.2401108834	-1172907.390539486	-997810.5290359817	-834384.1141742984	-922786.9836014117	-1144877.2640037423	-1203150.4394268217	-1177604.9676729843
237	-595470.5445243929	-808313.3373752107	-894555.8216584823	-819174.0426536462	-841082.9396631541	-695399.9490512045	-942089.3992289568	-1026292.5623854604	-1055561.706889509	-950875.6688046536	-651957.2003418785	-895295.1730383633	-978598.9334197241	-1012235.9012163094	-909113.6698307131	-618381.854826645	-847212.2933949518	-923083.5423533933	-950896.4454542563	-850768.4083852975	-696695.7227454958	-867387.9056761991	-946033.9798173658	-952035.0076169834	-857359.3006649637	-753782.5335388898	-994019.4557458803	-1073014.2201741033	-1097177.8520365101	-987758.6370543853	-711254.4793152353	-948040.6400422611	-1025991.4388354842	-1054466.7637553858	-946310.2344641767	-675654.8392114894	-898488.5194530771	-969375.634397312	-992490.640200966	-887155.8047962373	-797920.9068871458	-926462.4799366856	-997512.0813967964	-1084895.9100881107	-873635.6616278223	-812165.0496060282	-1045949.4379217096	-1119735.8779627462	-1138793.985303466
238	-591004.427455066	-706166.4924175164	-821078.8216581128	-827030.5548962485	-737702.2700531005	-703525.0557068154	-905558.7483096394	-930852.3896108189	-901110.751362696	-761239.8702117625	-682143.8282803559	-891204.1090258025	-911136.2828822038	-881415.6660691128	-741295.1159026361	-673115.7107675562	-884354.5339141982	-905259.195067717	-879635.8487649672	-744467.1229021566	-696688.436311872	-834437.9169482568	-878828.0876364057	-860933.5407608197	-747210.029558176	-761691.2248767022	-961846.0268822799	-988055.0583835418	-959372.3612914906	-818539.5799635783	-738380.8422960377	-945135.8532329677	-966109.425859116	-937624.3533497324	-796748.055885152	-724209.4149428253	-932855.6987256907	-954634.2903950926	-930066.4972569441	-794085.2483463523	-802372.4418411441	-962709.3414658622	-936577.294464124	-894836.4641341476	-756717.7894791932	-819857.3248477383	-1018133.2496537713	-1045257.7271562646	-1017633.9711983935
239	-585900.4950505826	-820210.4530693422	-913530.7805716845	-949392.8359872776	-846658.8072642534	-662147.4385637967	-934176.079562936	-1034896.8058363535	-1083705.1903631259	-1017126.4065689696	-600560.9112130156	-859929.2118550838	-961035.5086551578	-1013126.4526465221	-950016.6659185829	-555317.7655432695	-785777.1210778258	-875720.5078510484	-916360.9506236144	-847435.2583067724	-693029.9177884636	-875872.6405961949	-948640.9966238061	-960154.5973247096	-842306.7194825928	-724011.6167553745	-986718.7285746462	-1079937.045468632	-1121074.58797546	-1045319.3296054341	-665695.211785109	-915996.5698354648	-1009442.7563829164	-1053841.0084458427	-980876.688209113	-620314.8110511373	-843071.7933694237	-926152.7689937447	-960012.9214506386	-881307.3328848091	-800159.3346381886	-931534.828084563	-983751.156025599	-970916.3079384535	-837954.6376275729	-785875.7324469524	-1039261.3150863562	-1124977.2850624258	-1158443.9621121397
240	-685677.542791457	-681637.3815741605	-874269.9893440241	-866365.4003420981	-768383.9936356158	-931805.9743833519	-1114472.2863563101	-1104009.7717737667	-1039093.9598625617	-870457.5234106174	-937338.1360800735	-1135056.5209462673	-1115942.6909916596	-1049077.4376727932	-877454.9071691658	-902882.5866460351	-1111780.990985857	-1099232.2001678292	-1041897.6240403759	-877492.3641410646	-785153.4733830292	-904022.3149817659	-935120.6682195987	-894958.3028186689	-767815.2892087733	-964712.9454476449	-1147501.7197362403	-1141702.7202599328	-1081484.3091202271	-914907.612067437	-965861.2287382178	-1163028.5427481248	-1148865.4335551597	-1087014.0480738685	-918004.0254448128	-927506.5589184307	-1135108.9145666675	-1126970.1528776204	-1074130.0976326722	-912295.7583887279	-884629.395092726	-1126407.2483543113	-995971.2935354821	-923551.1428186132	-767246.5858921652	-997619.8361313201	-1180531.1084967884	-1179395.668746099	-1123874.658319459
241	-600643.7190468656	-848589.1347689743	-949041.8323063202	-991076.4785710886	-883032.3589496514	-689393.1342317823	-978101.3148548254	-1094248.68731851	-1159475.3678698824	-1108909.6600438294	-620927.7090498287	-892725.4221179186	-1010337.0050065496	-1079440.6927692904	-1032937.9299035531	-560988.5351812154	-796537.6628400082	-900476.9373818788	-954618.7580878709	-899612.002723788	-707123.6484076768	-899616.1156195726	-978216.0148062153	-994319.3260147795	-872996.8945881302	-747991.100545925	-1025594.2728420496	-1132476.1254735608	-1188160.9697562917	-1126589.4060994277	-683860.8842369078	-944960.3964266196	-1053095.3031531007	-1112602.551801306	-1054222.617352376	-625427.3329394042	-852036.3450798732	-947508.4707510838	-993220.2193170656	-926451.066491444	-813603.5701983998	-950643.0964206932	-1007390.142326721	-997562.1260986468	-862961.4378461749	-806589.0043600677	-1073087.168329274	-1170703.5635791337	-1216846.5414613034
242	-634813.441854982	-819600.3704858925	-851016.5345687037	-903819.2807497827	-818054.6532978317	-823577.8213915608	-1040666.6498641233	-1083816.6913414216	-1078136.7644763035	-952150.5565250898	-802876.8857920673	-1022081.9862993255	-1059978.1968891355	-1057392.4787835302	-933022.6741243498	-760829.5690525597	-974287.6095483718	-1006213.0634269525	-1007615.6625966977	-889659.4055429685	-724606.5319566325	-869847.3559171113	-885524.6326982235	-918462.1058551423	-815094.8137571057	-867098.3797811646	-1080585.7578013274	-1122365.299318576	-1115641.602362392	-987399.9305863425	-845155.2080127215	-1060517.682332685	-1097206.751320952	-1093535.1848867666	-966863.5832445656	-801266.5496742189	-1010950.3709605547	-1041891.5482311272	-1042089.8066600614	-921663.8061746032	-814399.6298497111	-920094.3374013568	-920032.6703012298	-933104.8645647881	-812134.9821103264	-910618.8756707683	-1120504.8032897909	-1160913.9229298458	-1153146.4245631057
243	-605115.425021641	-819879.8617608487	-900692.1125114504	-895753.4502778922	-850863.1175816376	-727766.1025252546	-977113.621165448	-1056808.975350824	-1075312.3428616875	-988703.4618556527	-684168.3773406225	-927418.3229042761	-1005095.199566735	-1024690.1956345757	-943013.0444724271	-641535.9791428765	-866284.9866942519	-934580.2232720633	-946314.5410597465	-867624.7014349691	-704717.7959593991	-874377.4808904228	-934677.7023025408	-909042.8330118496	-846496.5691033273	-782140.9911060716	-1024593.0840148873	-1099134.0401517798	-1113060.2193740013	-1020184.8107993609	-739850.0417407362	-976224.2762051745	-1048703.1128624498	-1063848.1352033925	-975330.5362743257	-696270.3221781303	-914922.9580722325	-978568.1518449718	-986475.3943252095	-900755.5784514113	-804320.1668536495	-928875.0999764891	-968663.2295936311	-922332.1465891203	-842130.0206250171	-836515.8171433808	-1072072.471050953	-1141459.1182226012	-1150808.0693465834
244	-639338.2118061959	-765137.3747459063	-807842.8079904543	-803094.3518669496	-710977.1197810391	-872133.5067066955	-1024575.343931128	-1017553.1394029002	-954544.5823069287	-775078.6927755002	-888771.479623662	-1065502.6963369339	-1051576.100457497	-985953.910632214	-802026.5583138829	-869429.4723089641	-1075892.2923783886	-1069604.5075945943	-1014806.4751342894	-838963.4097222717	-712733.3097325932	-820084.8682348029	-853811.7101832618	-834568.0660534026	-712241.8402072341	-908982.5828062214	-1065149.792244301	-1063264.1759148906	-1005630.2101608743	-829881.0021754836	-919661.0772643005	-1099158.464953004	-1090551.681593147	-1030525.1411266616	-851264.9773991234	-895143.9685294644	-1102638.1532185448	-1100807.0797762182	-1050664.6641590162	-879508.978910347	-786128.4108416971	-875032.360136556	-899780.5498802792	-866041.7176598671	-713506.5614333159	-945831.5964057476	-1105724.152334806	-1108975.2124689799	-1056715.8444139124
245	-586923.875929239	-827583.8866950332	-918347.5969176498	-950344.8359010462	-879109.8163164109	-673536.9754351043	-947900.6626518052	-1046857.2186107168	-1090733.9849594764	-1021725.1809805811	-612364.7984272654	-870064.6298082197	-970073.4639920713	-1018617.2330066372	-954351.0285669443	-564733.1620963202	-788910.3029422768	-878017.0915606163	-916946.1351221603	-850209.3811711001	-694613.1134986859	-879813.9473388242	-948661.2144885712	-958240.2651885174	-873021.9698938206	-733968.8294163895	-998602.5101502999	-1089960.5657056675	-1126418.8785797842	-1048408.839295769	-676446.5771645014	-924802.2946204909	-1017069.79884776	-1058134.61379434	-983926.1443812669	-629214.3021462288	-845658.9322386893	-927939.8958934111	-960352.379289229	-883574.1975845268	-802302.3542102794	-932044.0017391286	-978974.763356813	-966135.6132863364	-866934.1359582032	-794400.6209384816	-1049304.3076357674	-1133063.9003544527	-1162103.7846054507
246	-570613.7699074832	-771646.4694463302	-846388.7071640282	-850798.5487061847	-786786.9765833421	-649339.8680440881	-881291.9496845712	-944921.8952848183	-950189.047566806	-846029.899585943	-608710.158662836	-838615.6199030549	-899558.7235115692	-905971.0244822173	-805018.2210453249	-589867.2966786014	-808718.2702572749	-863691.3489769308	-866482.2763471465	-768812.616518258	-674990.2748566115	-834615.8292644885	-891044.8933060159	-875678.7602252787	-792119.3868351828	-712932.8103541302	-939849.0560913951	-1000187.498463907	-1002561.118212244	-893837.6218685845	-672749.9523503484	-897494.1185517001	-955137.6751443144	-958766.9003502749	-852954.6633575207	-650552.7507718455	-864635.7771336428	-916617.7072464416	-916956.3894102783	-814298.0011260848	-779366.7797834253	-897585.1890603325	-935701.0169480036	-900558.9058302641	-797451.7970870236	-776525.6901418578	-998406.0931700019	-1055453.1084488984	-1054933.175245877
247	-601342.0730769312	-816705.7179922772	-904665.1611031559	-820681.519712324	-852767.8991243942	-707744.5124309522	-957605.9218208331	-1045406.6969973552	-1078316.630349117	-975353.3488790771	-663731.9128539084	-909707.3053530522	-996847.7439211131	-1034429.3593523324	-933046.5940719536	-626339.0021701438	-856723.0793599595	-935945.9402125212	-967063.7586407474	-868617.5668587192	-701782.4419942052	-874550.5149540548	-955719.8133185458	-962733.7809288863	-869114.4997596305	-764695.666973876	-1007780.6970792674	-1090000.885840808	-1117422.9115648773	-1009538.259259192	-721729.5476046944	-960846.4574362123	-1042245.0486435522	-1074268.3328014757	-967634.3223036465	-682683.1919373953	-906818.3598294705	-980698.2096517726	-1006763.7089044336	-902883.5390787763	-802222.8174001966	-932395.3184472384	-1006774.4095226529	-1104785.9796539864	-885461.1003521781	-821646.7525280826	-1057955.3968602673	-1134595.0746842606	-1156529.1797605138
248	-659048.0147819527	-773444.4425174649	-811338.2079764999	-803024.7049936376	-709411.5865540337	-929427.0326981564	-1070387.4839026278	-1053283.1152927533	-980079.3684575467	-789951.3439300273	-956223.300327329	-1125614.0658563448	-1100946.0381613905	-1024412.859958016	-828725.5745567986	-932088.1170381624	-1137391.7931508052	-1122241.927944812	-1058405.7332829628	-871645.089198634	-725687.242511075	-825213.3083907835	-855445.4703369418	-833445.7771238072	-707997.1336015011	-959437.4116038897	-1105399.6663917264	-1094645.164809112	-1028034.6828349163	-842840.7755818884	-979242.1139674477	-1152547.7328832923	-1134441.6501581836	-1064746.8563720393	-875122.8117092511	-950065.7129211535	-1157226.4009319022	-1147602.913474184	-1089484.327054368	-908823.2631688846	-792326.4740200461	-876982.1723791775	-899552.6702023834	-863866.7866589805	-706582.6815989305	-989447.728009623	-1140411.755832047	-1136007.2143754687	-1075990.004811982
249	-546416.0598313574	-809733.4623604983	-835397.8534533695	-812352.134746896	-714138.7042003111	-1015874.0051432922	-1111938.2067898049	-1063149.0047677814	-975099.8398539738	-779825.7831282406	-1048541.2068851676	-1160514.1810601526	-1102437.561018897	-1012244.4605510429	-810634.1578784185	-1023479.4562643731	-1167790.1708685607	-1121187.7271965942	-1045439.7099566902	-852317.151803568	-807685.3149615098	-886684.5765400088	-884017.4877395548	-844068.3192961116	-711695.5572395679	-1040304.6313281553	-1144903.9815631518	-1104819.7155792369	-1024285.1736389727	-834084.6673343151	-1065752.9513747732	-1185617.037792291	-1136693.229822564	-1054311.2033725355	-858747.068039656	-1034926.7656090949	-1185346.2337250253	-1147058.3617390576	-1078159.1045663208	-891075.8050920236	-1068954.5700805287	-963635.6907195194	-932637.0574048191	-875784.441206159	-709252.4092100139	-1064735.2290256908	-1177869.693836499	-1146490.4434248619	-1073470.5074239718
250	-590534.6849024119	-762461.524414454	-821826.105813556	-828270.3236586353	-741120.002163758	-735401.5370257978	-925067.7156781186	-956024.1130673334	-930407.4464553792	-789449.4145072389	-720419.594272368	-919886.0237268592	-946079.9730122217	-920591.1488213196	-778942.120666096	-705711.7521361995	-912400.7366700503	-939218.9239027504	-918027.3329954396	-781539.439986632	-683241.9392566606	-822510.0603527003	-867887.2940816407	-857529.8163152082	-746174.6236895899	-788737.6955983813	-977631.867402984	-1009327.3791188272	-984683.332997493	-843070.3565594264	-771310.1041728432	-969501.7886208087	-996514.453024338	-972130.7605247386	-830130.0281174497	-752099.8854154657	-956958.3718365016	-984349.3188686302	-963968.5575466363	-827087.3747564637	-775949.197755805	-882558.5942335264	-913948.4188169169	-886789.2454280435	-751229.2460624342	-842073.7916709649	-1030195.9566005262	-1062630.645170321	-1038959.2195396068
251	-599983.3877791096	-847318.0877531598	-947451.3350163659	-989209.5183621824	-881403.2313244278	-688172.8322974247	-976133.956404999	-1091590.3879429668	-1156081.7127654264	-1104798.79852934	-620015.5046745102	-891256.5193117274	-1008128.8502911235	-1076470.5577254507	-1029223.9862379802	-560734.5482306596	-796055.7111186375	-899368.1266833963	-952905.2369129364	-897275.069106219	-706492.4071669861	-898552.6739349675	-976891.385318444	-992789.1289144615	-871622.3185632254	-746917.0883125399	-1023853.0839787951	-1130122.9632808727	-1185156.2514164182	-1122949.417135316	-683047.2656197886	-943663.1414750011	-1051140.1580941367	-1109970.6929603233	-1050937.5414159242	-625198.3492340248	-851634.8335924728	-946551.9745587452	-991732.9043916182	-924429.132967866	-813001.419060106	-949787.2600677898	-1006331.3805662934	-996368.6919562537	-861841.4133457651	-805661.2818276549	-1071572.149052591	-1168655.538569793	-1214230.7601863549
252	-664043.2823370291	-775549.79213299	-812224.0848248777	-803007.0536367471	-709014.8166144826	-943947.547786668	-1081998.1477286299	-1062338.547735471	-986550.9242077935	-793720.6800244347	-973318.3414044159	-1140848.7373657888	-1113458.3929683736	-1034159.9255175146	-835492.1936729174	-947968.3719268492	-1152978.273707699	-1135582.396055111	-1069455.5626457094	-879927.9590646839	-728970.2971513766	-826513.0641900084	-855859.5317610205	-833161.3433583188	-706921.3519097958	-972224.7220402206	-1115600.625309065	-1102598.3866582764	-1033712.8895412387	-846125.3104754022	-994342.3775219398	-1166078.7498198634	-1145565.1573914073	-1073420.0340823676	-881169.3595012487	-963985.1218652942	-1171061.288222577	-1159462.8853912915	-1099322.812137079	-916252.6978130091	-793897.3158969132	-877476.3342866322	-899494.9162023636	-863315.5704810907	-704827.8881931063	-1000501.8337937734	-1149203.0086175895	-1142858.2256330817	-1080874.8627786615
253	-540740.9660445714	-768150.984103258	-813788.1696041707	-808194.1759565698	-716563.5775108963	-805739.3273686436	-956814.6736931355	-952711.0068713849	-901803.0934796699	-740514.9766398313	-805573.6419634004	-966152.2461054755	-955520.2545976999	-904033.7092113929	-740024.2512492086	-795141.4219109225	-971423.3221467611	-965784.2094925169	-922378.0570695109	-764566.8906461998	-730953.2564293322	-842733.6909738666	-865810.1369426406	-842422.0077906547	-722536.6829416649	-853034.9142598151	-1007211.7647742021	-1007117.7353733666	-959683.9911291368	-799798.4935372771	-848813.4485039471	-1012020.6398639895	-1005650.3776397905	-957839.1715369635	-795749.1679290192	-832558.6565854942	-1010514.6254037817	-1008717.4683311612	-968485.5082748601	-812559.297648439	-921165.5468081689	-917316.3978444753	-917832.0406525523	-876649.7770506871	-728509.7878037113	-900330.4567493913	-1057608.793355269	-1061524.4729393611	-1017564.8887786038
254	-605655.1129816708	-858235.379944599	-961112.4533133924	-1005245.2352607895	-895396.1537579972	-698654.264229842	-993032.0150722377	-1114423.0846520877	-1185230.5356738986	-1140107.8592909246	-627850.6213773183	-903873.2368182312	-1027095.1591154796	-1101981.677076809	-1061123.835476542	-562916.0959763606	-800195.2965933726	-908891.9367625783	-967623.0334304727	-917347.4872131528	-711914.2719620438	-907686.7999389147	-988268.908717238	-1005932.3161033004	-883428.8433546126	-756142.0070001727	-1038808.524134917	-1150334.7720588206	-1210964.4140266385	-1154214.0537698306	-690035.6083521727	-954805.5391813017	-1067933.3133588773	-1132576.2863145713	-1079153.7548392555	-627165.1388079767	-855083.5008499625	-954767.5230646903	-1004507.7674924874	-941795.9485096366	-818173.4228006204	-957138.2198800162	-1015425.309709666	-1006619.3507294046	-871461.5411462388	-813629.6872705034	-1084584.970697596	-1186246.4594123391	-1236698.2599186206
255	-570658.9171027278	-772783.9412986349	-847323.2715702368	-869905.0177184511	-786815.333881785	-656195.9456645827	-887249.7045508692	-948801.5356794711	-953215.8749149307	-848989.6826336896	-616207.4772640793	-844283.0359992879	-903582.9363468605	-910423.2723340692	-808264.7015056494	-595862.5106509537	-811949.6304595685	-866134.2144037632	-870987.7643504244	-770967.2978921947	-674485.1915715382	-834017.7799003759	-891233.126785092	-892890.7890657216	-790789.7939936089	-718821.3773634197	-944867.699393099	-1003270.0914339096	-1004811.9760235946	-895970.4723238628	-679381.2547359448	-902360.1554997743	-958491.9600933929	-962506.9249192043	-855459.0448782373	-655958.1884052713	-867403.1185845595	-918733.7078573758	-921061.2698682896	-816057.4815337817	-778311.4642500312	-895251.6185021169	-935142.9158957559	-915876.5050978182	-794764.2505012414	-781446.7465622568	-1002485.6317117722	-1057738.6543731743	-1056408.0771558154
256	-653789.2686827921	-771228.0449059373	-810405.6049939012	-803043.2873825026	-709829.2843747956	-914140.6238646766	-1058164.4082754562	-1043750.0483430236	-973266.4664093815	-785983.1918211884	-938226.5705049662	-1109575.8319701802	-1087773.7112925986	-1014151.6792656649	-821602.0458390556	-915370.2480694233	-1120983.193826648	-1108197.8084131726	-1046773.0736872455	-862925.33412692	-722231.0210789571	-823844.9961505133	-855009.5689813729	-833745.2135280118	-709129.6580784041	-945975.6263973142	-1094660.6514495257	-1086272.4452472639	-1022056.9755273755	-839382.9958196674	-963345.3774687615	-1138303.0139071164	-1122731.4265061477	-1055616.2064221348	-868757.3349326884	-935412.1159555144	-1142661.7837677565	-1135117.3798430848	-1079126.904858278	-901001.9582992273	-790672.7770956483	-876461.9455896153	-899613.4704736335	-864447.0770825288	-708430.0326919332	-977810.5664299522	-1131156.8028624654	-1128794.8421993945	-1070847.4919247339
257	-606528.9779422076	-748974.9987116434	-831754.2747469299	-836076.4798633775	-746868.3830854194	-771508.9896921825	-956190.9041588464	-982646.4391688845	-949601.4517586199	-802883.9960082048	-758771.1452807462	-951688.0027028016	-974606.203129264	-942211.4727850461	-794499.3880824406	-738805.6007800673	-937757.9753420142	-963995.8840016703	-938280.2948680675	-796483.2471736997	-697520.0182542492	-808318.3305161811	-876124.9718626498	-865536.1137845825	-751425.1225955847	-821238.06387776	-1005570.1613606069	-1033255.78767477	-1001910.8201129709	-855089.0273298629	-805792.3302183562	-997945.4431914602	-1022112.9434147672	-991535.3820296777	-844047.7390442999	-781417.2499536248	-979103.1538846039	-1006249.6858051376	-981967.5573836291	-840333.4924177222	-788511.0561332444	-867661.6629289804	-920495.6101343421	-894995.6864319147	-755981.8621057501	-870967.0657671242	-1054949.3560943813	-1083865.136212669	-1054220.1786711088
258	-590362.9331930667	-834556.6444386521	-926784.6924026388	-959941.2685004022	-889549.6841840596	-680512.9812514078	-958844.3144494402	-1061214.119656675	-1108524.0069120086	-1043019.0816882721	-617794.4766876189	-878228.257487735	-981940.6161955108	-1034143.9265092986	-973600.6650511234	-566645.3879652163	-791576.2525687766	-883829.6387422027	-925735.0158362946	-862324.9335818122	-697940.1889654474	-885502.2618710464	-955427.1822509537	-965929.6353116	-882048.48140542	-740104.1781543092	-1008270.8844500837	-1102632.6376509399	-1142112.6118311796	-1067199.4691882858	-681304.0284668285	-932002.4711003527	-1027552.6930925186	-1071855.5729483473	-1000901.6797503949	-630965.1339487314	-847878.4119214114	-932941.3144044421	-967970.0103075055	-894047.9586588016	-805517.4480852686	-936447.8726520329	-984069.6029913342	-971917.9197120478	-874547.2919295961	-799695.3126006838	-1057697.4052535428	-1144051.1423858623	-1175701.2299662197
259	-628950.9341272421	-790305.8280156319	-823861.9965461675	-808056.0352493444	-711623.5085582144	-971486.6978156416	-1100773.6896526692	-1068854.2917036647	-985472.6918629316	-789625.3194548093	-997248.4944667739	-1154298.5782568138	-1115593.250727633	-1029673.3352903978	-827463.6721413829	-963965.7492315491	-1160661.88851519	-1135515.7683337717	-1064469.6507967212	-871155.3043419279	-697382.0215157955	-841676.6224140346	-869011.8285063081	-838913.4939198085	-709378.4832715589	-997882.6972492591	-1133364.520804704	-1109095.7457252098	-1033109.232082212	-842619.6164411316	-1016682.568495855	-1178743.2688223612	-1147909.108848936	-1069640.1049876667	-873876.5638166944	-978346.7052687301	-1177880.5442064484	-1159505.7404741119	-1094991.1107356313	-908140.5198199401	-765813.1058621331	-893047.4208228713	-914161.5989717026	-869770.8900955636	-707133.4594927842	-1024278.6341299686	-1165955.305646618	-1149337.183556876	-1080745.7884913718
260	-577302.5988586171	-803660.6835359089	-892821.5831424866	-925083.9309656247	-825446.6204587767	-646258.3994302746	-908559.9311992853	-1000284.2057761448	-1039517.8321018575	-963600.6047676369	-588683.4810384612	-840803.2451465256	-932284.0532174122	-974453.5712761802	-901658.9647787861	-552010.7080985816	-779501.8300652306	-861283.149289349	-894049.9108406734	-817007.0268531016	-684810.7906252277	-862026.012915642	-931393.5522200614	-940230.5433472388	-824408.9421892966	-710027.3543972871	-964047.4394385954	-1049297.5085520367	-1081951.4120275418	-997924.5615828759	-655101.4253760313	-899105.5577735425	-983985.6334537942	-1019572.6794848687	-938103.0937065796	-617333.3103640722	-837843.8808698658	-913698.6336660534	-940647.2182677257	-854980.5853996292	-792318.9774845451	-920391.3422633013	-969965.4636728558	-955377.1030434393	-823371.2688591836	-773796.2468642996	-1019534.8851779057	-1098310.8112958549	-1124384.9723882007
261	-608355.9816105888	-871037.9118499851	-970927.3326434405	-1010149.5270868023	-944170.7717684114	-717011.2424853474	-1016101.185025706	-1136329.011857679	-1201600.8886805954	-1154428.1560474895	-646202.3967468996	-920940.1220574611	-1044029.2142600081	-1115379.1391054576	-1074314.2079521301	-576650.0985602327	-805524.4241252152	-914240.7179549425	-971718.1862500473	-925713.1543665795	-715347.3518504179	-915263.3594453428	-990826.5304445472	-1006160.1980242669	-929274.9292979329	-772204.1457997742	-1058855.539938231	-1168932.5525897876	-1224221.7715750744	-1165511.5028400538	-706718.0735854752	-969673.5867806604	-1082398.8934409735	-1143643.235512044	-1089717.1912054485	-640125.4354431886	-859490.6656087714	-959108.591806828	-1007825.2360928741	-948846.3745226974	-822338.7265117787	-959488.7982550599	-1010725.6570174358	-1002170.7801622319	-914379.1043987359	-827396.9866716234	-1101609.8499220377	-1201536.0758080375	-1246842.67192599
262	-567914.9033365098	-789042.8125936192	-871712.5732664628	-897301.7167335288	-821404.7108344024	-634977.9480052337	-887410.9524996463	-967501.1865464557	-992401.7927983768	-904025.7232826103	-582352.9093191677	-824941.1663377595	-904479.217172858	-932795.3147873138	-847950.9938258867	-554163.5651561124	-774174.589199806	-845888.9408517384	-868366.6612143037	-783242.132284797	-676223.1067294413	-848372.4775560597	-911263.1469683838	-915738.2029337175	-823129.0205275256	-700056.4321926972	-945161.7419450388	-1019917.2224806517	-1039673.6683760618	-944545.9079093329	-649597.6032763255	-885004.1909924725	-959126.8702763108	-982293.673532072	-890095.9281843146	-619536.791364915	-833391.027047711	-900295.1606920152	-918246.8462494067	-825681.7515069979	-784531.312129783	-907702.1385297499	-950813.6542076246	-934174.6146937254	-824853.3381981495	-765134.853906231	-1002912.476867932	-1072333.2504634173	-1086945.551879107
263	-563258.7173525665	-779602.3018999605	-860289.4759672128	-884308.9772886365	-807270.0330112532	-625533.0397021872	-872594.1948232738	-948063.1847061933	-968315.642288272	-875195.6240977318	-575001.5947367987	-813888.3207863646	-888412.1198493676	-911773.5151724946	-821888.6515274983	-551574.5767776584	-770565.1240666226	-838019.2548762895	-856467.2771516626	-766838.7225725376	-671718.5344099288	-840670.9918390947	-902102.6120176065	-905327.4610804108	-810907.9049252128	-691749.7008391431	-932071.5996622478	-1002760.3334693226	-1018425.7113939322	-919105.0208222652	-643021.0344853746	-875255.7750064775	-944933.9384612477	-963716.6819910707	-867112.522037802	-617166.3165883534	-830386.0435892979	-893523.6727566916	-907933.2329370559	-811501.1852145572	-780178.3531967513	-901739.6783417687	-943915.6821540007	-926345.8720852653	-814545.7837120927	-757966.2994985596	-991548.948874142	-1057457.4753819925	-1068535.7873275916
264	-621071.8011732544	-844906.1067281879	-938634.9385967226	-825747.0000575231	-892032.1334585974	-749225.1723257189	-1009745.1167508884	-1109634.7213209667	-1154778.5684447153	-1057604.1576720264	-703297.738719525	-958135.4870969907	-1058168.0740620755	-1109004.640835308	-1013466.8941019092	-653076.9039115468	-888681.5752427413	-979166.6467383576	-1021389.7642734166	-928594.971426829	-718875.0247486545	-898618.5804071648	-988266.5104272449	-998684.1959731585	-908614.7559162088	-801366.3828572365	-1054021.7307975213	-1147080.1100783115	-1185451.111754058	-1082722.9538913458	-756928.2607323182	-1003877.0401836305	-1096861.0313859486	-1140806.2998170722	-1039288.3134594888	-706300.1235432597	-934808.5985282112	-1018744.7471286443	-1054724.603942204	-955732.4553684826	-816678.2567219579	-952331.0625392942	-1037898.0281556709	-1171621.3293998437	-925197.378318571	-853507.5224908506	-1098298.2655483475	-1184525.4988356559	-1216123.638212344
265	-602428.0044658154	-793142.114030042	-774335.8225742445	-870092.5304480776	-784256.4701608447	-721864.4300799298	-945715.6193411744	-1002484.1706909293	-983489.367300966	-850845.0662913837	-693860.9077487014	-920992.0585681165	-976171.1083647278	-956613.3880298506	-824169.0713722883	-671763.4655524638	-894863.4278681187	-945982.127297533	-928850.6249967732	-800993.2580031004	-700870.8181891076	-863270.2463355573	-915540.390298101	-908281.4810438065	-791383.2015365638	-777591.979744503	-997442.0630964086	-1051925.771546046	-1032781.6314614428	-898274.758824282	-748622.5153444097	-971409.2971620256	-1024265.2084208668	-1004717.397857589	-870482.645432194	-722869.0522158244	-941608.6469881026	-990541.9788774491	-973363.7612563015	-843639.6079280043	-799313.6268170842	-933398.3786075509	-1056744.890450107	-946470.3640106979	-798509.9379740768	-833319.4669090764	-1049168.444318121	-1101367.3723676412	-1082073.8853977663
266	-590811.267025765	-742858.3491426635	-822498.4876087541	-828981.3118400489	-740874.9442739881	-726962.758873417	-917944.3184456665	-948807.6439304351	-921066.0937308202	-779587.6538872492	-708836.3842601865	-906743.9145102426	-934101.8386619631	-907130.479634955	-765176.1673543988	-694564.800935799	-896495.4006412209	-925933.394368812	-904371.2286126006	-767827.100535979	-685808.2442611123	-804931.300497975	-869375.7152070359	-860099.822392709	-747822.280851963	-781819.8679866629	-971858.0660946835	-1003394.4693778412	-976739.2096042724	-834576.0012219656	-761474.9908862961	-958054.7379995853	-986107.1739708954	-960333.9595562044	-817951.798630515	-742472.0522678625	-942678.6789429504	-972556.8401949358	-951897.6664418944	-814863.2699383554	-780805.2195927718	-867004.2523292082	-916252.8831658589	-891218.2714047275	-754769.6174299377	-836676.906935061	-1025771.7512687489	-1057981.2948502959	-1032412.3178128767
267	-630129.6600646303	-854849.8192392361	-940062.9235783592	-928346.4511217184	-897319.3135605191	-784626.3388344247	-1046585.8190847645	-1137928.843652341	-1166028.6724842396	-1092144.0072215656	-738876.7561614662	-991801.6598188523	-1081610.7814690492	-1110763.4359324123	-1043061.4316150167	-678996.5752576583	-908021.7489116902	-985975.7565496458	-1004194.1710927904	-939264.9954735056	-726270.7098022315	-903205.2949815921	-966312.165525062	-933232.3032246054	-885920.8695819639	-832317.9954990105	-1086033.818552229	-1170871.8174346946	-1193173.7814438115	-1111788.4822892693	-788498.6472022177	-1033304.861527804	-1116539.506311911	-1140033.6601738986	-1064054.9420630736	-729416.2704802507	-951381.9441552231	-1023483.1849666561	-1036877.7510568795	-963438.6628804738	-822411.7594809594	-951560.7706650748	-992561.3449717651	-938118.0838198862	-874522.4256034087	-880009.5896047229	-1125481.7375044813	-1203814.8091733877	-1220318.8544907046
268	-603574.4321225503	-817725.5501833376	-898266.6879409498	-893745.570253815	-848001.2004372922	-724263.2482407859	-972833.8115492875	-1051811.6152151665	-1069723.7961985709	-982331.044485584	-680798.0874581299	-923452.0107290443	-1000381.4848287622	-1019387.6848093304	-936849.5997823444	-639228.2326733414	-863713.8085591791	-931414.0200405987	-942748.887393759	-863211.3270418518	-703390.0365004576	-872601.5538339107	-932728.8726418029	-907552.6494517064	-844067.849336971	-779049.8549056533	-1020808.0497944029	-1094714.6603386642	-1108124.852369643	-1014541.5997615667	-736853.0620034802	-972707.847399459	-1044524.0763887826	-1059154.7535032816	-969864.7013582662	-694228.3780259541	-912676.9154263001	-975801.1774808154	-983370.3753755015	-896894.0097153586	-803205.6408358037	-927477.5574419227	-967190.9948426558	-921359.6596377387	-840134.4982366498	-833836.3990279596	-1068782.2125157998	-1137617.7184433192	-1146525.8825784007
269	-599435.2873625063	-813863.370597288	-893298.6233366604	-922469.922609888	-840214.629350352	-726951.0778832329	-971784.8992207161	-1045075.4335210059	-1059841.1162697333	-970181.6458635316	-684997.516506322	-922741.5654514185	-994681.0202467361	-1012841.4848626828	-925785.9969260439	-643646.9134695656	-862460.5493926678	-927118.955672043	-941054.435204263	-854984.6961868757	-698849.2754555715	-866666.9671856498	-927729.1582398558	-934301.4498148568	-835035.2702593259	-781132.199060274	-1019431.9720549299	-1088133.631062172	-1098641.0124194862	-1002907.9567653866	-740523.619091529	-971794.0020134259	-1039087.874187289	-1053000.9414701483	-959382.2784072941	-698318.5691198653	-911482.9037459117	-972013.9314279549	-982219.8157333465	-889470.6272501304	-798263.2603418739	-919470.5637740117	-962159.6241873314	-946132.9273890707	-829855.90471258	-835313.2577373155	-1067078.9823469496	-1131191.841472583	-1137440.9086114336
270	-598044.1775163992	-809994.2416668311	-889562.419796172	-886539.7695273452	-837730.4649398868	-711692.3427857433	-957474.5994093815	-1033877.2860400445	-1049667.8401045287	-959461.9640803868	-668702.9239062935	-909217.8658543639	-983465.0910821462	-1000358.2428613594	-914730.4722982373	-630946.2830611743	-854486.4657640808	-920051.2746216215	-929952.6099924127	-847372.7828924204	-698625.0256636097	-866228.1767792469	-925734.9895328928	-902204.7373994471	-835351.7555231259	-767956.5070902985	-1007224.4681019587	-1078854.564174537	-1090413.0017018004	-994289.4663132802	-726097.6191936632	-960088.2262373581	-1029526.5149325226	-1042311.3301618883	-950249.128347619	-686900.3292985787	-904616.4060653485	-965871.1688925159	-972227.2056964305	-883035.7639686536	-799205.8737716563	-922462.1118524986	-961907.4967696137	-917869.6367794413	-832973.0461063649	-824220.6088556896	-1056974.2623103203	-1123831.8542540814	-1131158.1394089689
271	-604316.9725999129	-820957.8456743609	-909787.2121708663	-821445.3059636619	-858688.2621127128	-713999.0738081515	-965467.6047273998	-1055091.1649225862	-1089845.7594915123	-987755.3389444447	-669697.7505947709	-917009.4320760132	-1006093.782183517	-1045674.0135222636	-945172.575283106	-630370.6122738256	-861541.864175074	-942462.8703292928	-975255.1745311796	-877661.1153236675	-704359.7059095764	-878179.5602245212	-960627.2886385601	-968154.4776584135	-875070.4507298702	-770224.972530253	-1014753.039955916	-1098607.439166191	-1127680.3798535462	-1020573.237140683	-727036.9007715357	-967334.7201970548	-1050480.188033933	-1084301.09987097	-978438.4967488572	-686244.2140774658	-911038.8005444414	-986434.9651528352	-1013995.3769270775	-910852.2356108712	-804402.445995829	-935401.2815958535	-1011467.3093828433	-1114863.5868620817	-891452.6393024448	-826450.8019757651	-1064038.3991312538	-1142123.713409796	-1165514.9866178187
272	-608282.0733063683	-794380.449778717	-868295.6517543313	-880091.034186338	-793395.4224861433	-771373.444247437	-983889.840432392	-1026716.8423264234	-1020999.7053396046	-900071.3821142432	-748910.6662593267	-964224.3616873851	-1004164.1093495146	-999379.3422556678	-879264.9887775017	-716656.028571924	-928299.0937618767	-965941.8571857966	-961967.870922066	-845778.106522883	-700023.7579934989	-849218.4407257406	-905543.0295583416	-898589.8469971289	-791355.4769852365	-820393.7463211275	-1029806.5984905709	-1071402.0422826398	-1064525.720777485	-940813.0706924875	-796850.5991217928	-1008786.8101474141	-1047517.3215736429	-1041658.6408476015	-918753.6248556959	-762183.9795566867	-970450.1404084039	-1006954.2243544153	-1001912.0231793445	-882859.8709287234	-791765.4458332997	-904056.4316358189	-942790.3511020115	-917088.5973407602	-789315.53150896	-869413.9733744485	-1075723.2940487498	-1116087.2547592258	-1108051.7362564157
273	-615023.8217686737	-836116.632257006	-918204.0699366537	-950945.0159263789	-869141.7229053146	-765280.0541594732	-1017578.7147279091	-1097228.2573612067	-1117601.3976540903	-1035832.9101301709	-722261.9763339097	-965243.5722987289	-1044030.0382913793	-1068322.7639610409	-989448.8126522789	-669532.3465763687	-889822.9717749067	-960155.1839708069	-979010.462996181	-900498.0146565066	-712047.6168889196	-884353.4569943133	-947499.5336167791	-956734.1438635673	-859003.6207795247	-814886.7823912941	-1059824.4093000276	-1134105.3153080258	-1149469.4229851959	-1060837.3842948794	-773645.2338687637	-1009407.2206215931	-1082747.7301214228	-1102022.7283675878	-1015678.8469752976	-721265.7388381661	-935361.4972377615	-1000876.5221855935	-1015350.1962449278	-929239.4840424636	-809071.4080350959	-932590.2817316205	-976794.9267964748	-962523.2252493246	-848865.5106533049	-864493.4481231153	-1102070.041319856	-1170982.389203414	-1181337.4483685917
274	-571434.4901950764	-757769.994674011	-828914.4339537402	-841933.5824771675	-756508.4500821518	-669483.8369969954	-882557.9840375151	-927320.9502069433	-920133.7392713261	-798354.1357470143	-639530.5871960247	-855113.869061203	-896738.9468360661	-890618.1254455862	-769939.1838331936	-626427.8908304055	-838567.869953083	-877855.6509133896	-872561.2500412792	-755642.5841518478	-671971.1346503125	-821099.0601890038	-875445.9654123278	-869687.4187363398	-763225.0607293006	-730594.0996836849	-940577.4851973127	-984059.8406882847	-975732.5534812945	-851174.6992996796	-699870.1239145764	-912086.5266696363	-952456.859028999	-945284.9877768789	-821823.8678805134	-682624.1385227271	-891391.0249645091	-929487.4306347617	-923156.4498165136	-803386.7936183508	-772507.7806882726	-884428.125685449	-921977.43750339	-897441.1925119987	-769941.6713888145	-791704.2935848167	-998596.9238571103	-1040798.737455184	-1031331.3677118714
275	-601369.6719911332	-816624.7826819508	-896389.145628035	-926003.4031395488	-843804.1986880209	-731707.3288949017	-977467.4637579088	-1051547.0887868188	-1067008.6021631388	-978328.3255409407	-689621.6714400953	-928015.6487352652	-1000804.7506408922	-1019726.1688662006	-933685.9295911199	-646859.0424999471	-865855.9583438302	-931218.4284347716	-945764.4069573084	-860632.4537856034	-700487.0605177733	-868861.6875569704	-930182.468425076	-937085.1277037384	-838009.5080941202	-785320.8126553663	-1024444.2783875115	-1093838.2673698731	-1104948.3209536965	-1010096.432040771	-744633.6874809627	-976461.4345002183	-1044505.6352164237	-1059084.0656799981	-966368.1318586171	-701166.0884066055	-914446.003611515	-975595.4965994594	-986330.9718646639	-894405.5533485534	-799604.4457424352	-921098.59243199	-963975.722074714	-948166.8030192871	-832214.8108528164	-838934.233915831	-1071421.0304736672	-1136129.4592042868	-1142888.0397877016
276	-586712.1278460427	-827154.5631992215	-917828.1118786883	-949753.9686800176	-878467.0174793433	-673107.4519504257	-947226.845057754	-1045973.2419729632	-1089638.6257492388	-1020414.0825275106	-612030.4847256312	-869561.9826056716	-969342.7850474352	-1017661.2304351926	-953165.7986288962	-564615.4233873327	-788746.1562939361	-877659.2040263974	-916404.9901216879	-849463.407840904	-694408.2603082065	-879463.7090012761	-948244.6233722436	-957766.8187583939	-872466.1935970332	-733591.0664902935	-998007.2133673306	-1089180.3266056213	-1125452.591112248	-1047251.8711046192	-676147.4963631128	-924358.968600793	-1016424.3508100014	-1057289.7930840151	-982880.9343716952	-629106.5007199257	-845522.2754364159	-927631.9508079622	-959883.34994692	-882929.3118902233	-802104.3958998768	-931772.8485849606	-978661.0661880716	-965779.5877223029	-866465.3821514631	-794074.618570804	-1048787.5316136475	-1132387.3988421822	-1161266.5688307113
277	-586982.8617740049	-741368.5003054157	-820244.0305648918	-827253.1226229907	-739415.106213359	-716112.5132543634	-908628.4943804041	-940565.4372826087	-914115.6595922079	-773913.3009870844	-696673.6398024987	-895796.7616972993	-924236.0813344376	-898585.7074905409	-758033.8313723622	-683788.9499632071	-886444.9640015949	-916662.4110824951	-896111.9058635795	-760847.24558978	-682955.5758731317	-804106.3124587812	-867731.780555025	-858775.6902321553	-746944.7269685846	-772218.6716695505	-963646.7201009812	-996121.0675192507	-970608.0925237342	-829579.588112038	-750680.4969841717	-948338.4513173288	-977337.1515697083	-952734.1449079484	-811595.5400213023	-732986.0653996961	-933806.671314069	-964350.1828918102	-944573.4619815131	-808659.4191345149	-778928.2881975082	-866844.1250558343	-915219.4707119542	-890298.1962357006	-754474.34772381	-828324.7604390321	-1018664.8833449103	-1051676.6977792445	-1027100.5183095551
278	-618743.4990703438	-841578.183298318	-934626.1705089143	-825149.223520391	-887398.5673535208	-744330.0461895862	-1003592.1785752054	-1102055.1822939527	-1145755.3071817395	-1047897.7526904794	-698628.5818453623	-952420.4850024832	-1050931.6715672542	-1100204.0236218187	-1003976.507170964	-649921.5683413863	-884910.1581808098	-974066.1779735528	-1014978.7609113962	-921517.0473671926	-716857.93175188	-895778.3117965745	-984425.6798313535	-994441.693160173	-903953.3369130748	-797038.8774557619	-1048564.8336967936	-1140344.199822688	-1177423.1145721194	-1074086.4396129423	-752774.4661440356	-998799.0078959502	-1090415.8078709147	-1132954.1648170627	-1030832.4372570603	-703513.0931668767	-931505.4748711046	-1014254.8812377718	-1049064.7462782392	-949495.7630870112	-814972.3726060169	-949978.4485211988	-1034225.1348263934	-1163734.1003107086	-920508.1064188618	-849747.6380493368	-1093537.4099731806	-1178633.217351423	-1209090.905563531
279	-582773.0218775421	-756430.2952819583	-806959.7542360604	-805816.7616573665	-715378.5355608093	-774059.8096802004	-944493.214203817	-950932.2252009136	-903995.9766623657	-743860.8812100302	-768959.6505039837	-954695.3279337724	-956004.6997270588	-908354.451029958	-745638.5490341684	-754939.4409267291	-959413.5951393135	-966507.8927329516	-926886.6971052241	-770480.387069361	-671190.6655092491	-817810.1755165395	-857349.3458180149	-839711.6742446148	-721811.3690500979	-823335.3286230505	-995440.2557388787	-1005149.0311005141	-961453.7373429491	-802710.5697461476	-814445.6425307224	-1001110.5347871452	-1005816.9918395139	-961584.0041642076	-800816.7492544471	-794964.7166953506	-999248.7651036101	-1009204.1923153257	-972438.2708907354	-817957.5052802917	-759608.3075827602	-879190.0578052294	-907738.8754148515	-873606.524334573	-728244.2033117096	-872610.7850388016	-1046387.2430662521	-1059365.828707803	-1018911.506315844
280	-675229.5028729013	-684344.3922006456	-868399.8598851769	-862024.4421519276	-764997.9861970607	-906613.0973717275	-1091416.7760640518	-1084900.2787080444	-1023866.2569885775	-858404.3613658486	-909175.1216339357	-1108145.1879355346	-1093340.4398678807	-1030574.4352490662	-862428.4349822081	-877525.7207331478	-1086682.4115889769	-1077825.5136633536	-1023990.5603580474	-862811.8180778954	-775390.5514021501	-896343.0433556074	-928908.2696208843	-891203.3606586203	-765541.3112732559	-942307.650836581	-1127012.9243358453	-1124746.3023901575	-1068008.1443091931	-904272.5226577749	-940756.6977444775	-1138982.1013700543	-1128696.6448026237	-1070527.5356320553	-904622.325626221	-905070.8688279723	-1112788.4314468887	-1107951.3219854669	-1058231.368176181	-899250.1527452762	-875551.5916624954	-1108341.6944779288	-989416.6251798959	-920382.2166870731	-766084.637383064	-978002.1251548263	-1162609.0267542473	-1164592.3260722705	-1112150.031575408
281	-571610.849761582	-774142.8635672689	-848844.1527117314	-871643.8836429579	-788581.8017461278	-658536.5508393296	-890046.1591385172	-951986.31078221	-956743.0761772005	-852998.7562850104	-618483.0764577021	-846878.4723200228	-906596.4936663022	-913811.3035724537	-812152.3481480711	-597443.2358507004	-813620.5497911964	-868151.6115383205	-873305.5949760671	-773746.6235898642	-675291.1642130804	-835097.8267367671	-892440.4286076196	-894260.6685896491	-792253.4502325183	-720882.6417146147	-947334.3123011804	-1006077.4077906572	-1007915.8742320111	-899508.002699536	-681403.8660988167	-904657.0520690609	-961158.1018653944	-965500.4994738844	-858896.8627516159	-657359.4850066039	-868861.2937022536	-920496.2367805865	-923084.4165213039	-818486.0147492542	-778971.476827405	-896052.7899062652	-936036.6383049866	-916877.3984092092	-795925.0950203877	-783228.6700898999	-1004622.4029396703	-1060168.5121719732	-1059088.6723109952
282	-574921.9410073112	-796535.4477816619	-890255.9540418264	-934075.2115577204	-779368.2051451786	-635693.7213943461	-895546.7782298954	-987955.7329678239	-1034976.3742392696	-976330.330818862	-578692.264957087	-831131.4992910123	-923165.2877376515	-974157.1823373275	-923192.3907908895	-544946.8274788666	-776366.7260633844	-859258.4484934988	-902187.0225929412	-848887.7585561469	-682025.2535452812	-857475.2770380832	-931928.4207546203	-961306.4022495997	-884763.0188184136	-700737.02868961	-952698.8992615759	-1038791.5258733287	-1078852.2332443981	-1010968.402795702	-646045.2107552469	-890661.1999760733	-976219.7926109566	-1020142.7528912988	-959230.4958125602	-610710.4010522912	-835246.3984167506	-912221.3622828147	-948683.8318927941	-885432.8080842413	-789128.5660832513	-918415.1062622081	-973600.8397268583	-988537.530441479	-990157.8324916486	-765780.2685758247	-1009850.9577609599	-1089627.3285969319	-1122728.0922495269
283	-581326.7774454725	-767064.8446134556	-818132.8318693768	-850424.5166337325	-765522.0030741417	-686936.5130623383	-902188.4429642118	-947235.1100659403	-939964.6671099644	-815760.025287071	-657294.8786562601	-874717.5390875847	-915501.7563664229	-910318.4768953341	-787609.6106842234	-640921.0276302169	-853944.3157074756	-890669.3918847593	-887800.4821745385	-770005.3117427131	-681553.7263332164	-828826.9351323697	-864018.1701260648	-877007.6193132837	-772407.6533165483	-746300.9571616536	-958230.013112979	-1001927.6956372311	-993572.4909725024	-866837.4876721805	-715834.0524093905	-929672.903959027	-969200.2403332208	-962961.8916408229	-837700.1849765606	-695465.4061460692	-904929.9452105856	-940532.2888573979	-936565.2670333071	-816103.618409073	-781780.6788668374	-890589.0238043595	-909903.4468062151	-903590.6576698965	-779293.3072528039	-805665.3387609688	-1014271.5207857322	-1056620.288524262	-1047180.3074953144
284	-577541.746346225	-808561.4303405894	-895330.2648199797	-924164.7035930407	-850628.6990654569	-654505.6579781887	-918045.1669737493	-1007690.0004778712	-1042200.8322845054	-963633.0585059973	-597552.0340198446	-847793.3482095401	-937698.5567972736	-976258.6913301398	-901835.8855886428	-559516.3978735559	-781637.2967260997	-862159.8182785985	-892969.093908871	-817156.8106650243	-685536.4826760631	-864295.5945007994	-930202.904134496	-937262.8107956175	-848396.6455134604	-717230.9176922692	-972226.1129056981	-1055389.7481952051	-1083604.6339452057	-997145.9172001291	-663194.9113545263	-905159.4147344362	-988471.3008687272	-1020702.3156642254	-937615.0014266635	-624437.8388340544	-839603.9455395179	-914295.4715731399	-939570.6371296034	-855000.6159073784	-793531.2215879838	-920029.7535303778	-965075.4758519141	-950360.840139833	-846164.6022227271	-779956.114939883	-1026407.0065989103	-1103089.4856848095	-1125008.445800102
285	-633215.310808203	-819153.2325530683	-894943.2951986232	-905910.6056642293	-818355.313095373	-840317.9329231518	-1052456.9221420477	-1093973.9369759306	-1089251.538308853	-968899.241299655	-822923.6478168343	-1038054.9252381625	-1076854.2796255727	-1072973.565288529	-953241.2452804788	-777709.6825079981	-989016.506564708	-1025546.1545692112	-1022465.6383312403	-906769.0914632295	-719005.8094961072	-868245.6640638183	-925908.4697065871	-918146.9263862832	-810390.1677386658	-881157.4580259002	-1090184.2538472163	-1130502.902431533	-1124608.3894846658	-1001467.6541006906	-862473.2809155772	-1074219.8977712078	-1111840.8101047955	-1106870.7111664112	-984341.9877167795	-816018.8377647965	-1023946.1782921895	-1059372.8038982623	-1055202.666674681	-936636.0197088576	-804796.3123989991	-917338.0955251738	-956873.5900567144	-930383.1846522435	-802425.0224148883	-921996.9038894393	-1127911.5230523846	-1167031.8846263448	-1159965.2407153612
286	-614439.1383012019	-800497.8917528429	-874876.0756817728	-886466.9723177751	-799559.0692541836	-788398.738206182	-1000821.9367380302	-1043325.4477307643	-1037853.9534723337	-917067.8753465662	-767187.58428401	-982456.2330339713	-1022114.3696332935	-1017552.8511882427	-897532.8378416193	-731732.7435564431	-943292.7766687862	-980660.6650796398	-976907.3141433164	-860839.3458965905	-704711.2248669139	-853917.0624251945	-910572.1132716746	-903419.312440567	-796055.9427036094	-835398.8623741906	-1044716.380994314	-1085996.5303494432	-1079362.6586707667	-955791.2383793505	-813055.5992510333	-1024944.9915020294	-1063401.4962441644	-1057762.2437339504	-934950.1501970481	-775478.0702639441	-983660.5621272966	-1019898.5762928497	-1015071.7243851405	-896139.4638089805	-794983.3148476268	-907336.2330575265	-946268.0951204326	-920371.5900989317	-792552.8161797149	-882398.9104800206	-1088610.7627505977	-1128667.6265303008	-1120871.363913666
287	-561919.117270177	-776886.2358006603	-857003.0131549477	-880570.9232480838	-803203.4395285752	-622815.7083961451	-868331.3647145835	-942470.8073921213	-961385.9772536166	-866901.1093647409	-572886.5972572792	-810708.3806245353	-883789.5628955577	-905725.4740089541	-814390.429589933	-550829.7162722915	-769526.6690292875	-835755.1202353095	-853043.7850648625	-762119.4074339693	-670422.554079427	-838455.2489678807	-899467.0958640183	-902332.2562727593	-807391.849612086	-689359.8267997506	-928305.5225036057	-997824.23984841	-1012312.604009041	-911785.5936010531	-641128.9339282707	-872451.1235378634	-940850.5851127403	-958372.0201831674	-860500.1201978337	-616484.3231677867	-829521.4999258035	-891575.493318125	-904965.9723313575	-807421.3894677393	-778925.9925381701	-900024.2588575366	-941931.1128169465	-924093.5169861638	-811580.2662507255	-755903.882724778	-988279.6243477566	-1053177.665770992	-1063239.2372767502
288	-588512.7841587386	-821845.4858923885	-924051.0858430698	-977759.1744330958	-799451.6291361741	-658747.7794858328	-934058.5387028293	-1041750.4889012004	-1107397.281918605	-1070154.0527999732	-595225.394950309	-859900.6441250158	-968225.9634426604	-1038770.3869927151	-1011312.6988761792	-548118.012924043	-785818.7601653984	-882739.6695958171	-942242.2187357609	-910467.0003952188	-694846.8759447646	-879123.150119502	-960967.9100307329	-1001694.9122248075	-934897.978246546	-721029.9968100276	-986839.7001093765	-1086547.6058675623	-1143281.5008328678	-1094637.9665102523	-660743.1087880024	-916101.0518798385	-1016220.478144998	-1077675.5044739181	-1037870.9738590781	-613484.3120709901	-843125.6408581117	-932567.098836714	-983776.9071036212	-939671.1484489103	-801180.9677307905	-936400.8143035171	-997884.6914143129	-1025630.5875165191	-1070344.327356918	-783312.145083283	-1039620.7989728253	-1131344.7359358035	-1179165.7197471308
289	-585031.5360684312	-823747.1295823238	-913705.0885582761	-945064.402765977	-873365.2832679763	-669698.4310717213	-941878.922700777	-1038957.3396489165	-1080945.032615033	-1010008.2207760871	-609377.1201726753	-865572.5969975924	-963543.5683183231	-1010073.6762212733	-943758.9239200659	-563680.960589634	-787443.3652444974	-874818.739837825	-912110.057083515	-843542.8033843207	-692782.3915761724	-876683.9545808218	-944938.2434789386	-954009.1924054436	-868055.1356055111	-730592.8562685043	-993282.4911238279	-1082987.7632713248	-1117783.408240612	-1038069.3028392815	-673773.7665608492	-920840.4004406517	-1011301.5905528188	-1050584.6615999578	-974585.3629481022	-628250.9076589391	-844437.6644459008	-925187.8673917189	-956160.7809193997	-877811.0148129301	-800533.2501130976	-929620.7735602919	-976171.3299199133	-962953.9015271668	-862744.9999811016	-791487.2190046273	-1044686.0090849345	-1127018.1748950176	-1154621.7958255666
290	-600820.8569717443	-791437.3327728203	-774686.7025821413	-868521.0924363439	-782724.9330610239	-718206.3131680111	-941816.5812273402	-998348.006015511	-979596.7371520149	-847188.4453274849	-689978.7000134754	-916843.8973555746	-971743.3414605963	-952470.7705108714	-820290.5229187222	-668548.7912694049	-891402.0710529388	-942280.8455328468	-925397.1322829826	-797780.4297672885	-699522.1778507119	-861607.0021221706	-913879.1032435125	-906683.9865150789	-790050.2012122063	-774348.2874498153	-993979.2245685486	-1048248.3255394872	-1029324.8071270663	-895032.4912993336	-745166.6990855624	-967710.834294271	-1020311.256472112	-1001024.1155537543	-867030.2430711131	-720028.1105951536	-938544.3989520653	-987259.9968314306	-970306.9738982113	-840800.5429979184	-798223.4937545399	-931776.6714387898	-1053071.436452656	-944846.8130859432	-797375.4743057969	-830490.1992316194	-1046141.805377026	-1098148.645030732	-1079052.8671191074
291	-586751.5842259153	-795756.8727471068	-873034.1595373212	-899300.994665629	-816677.9287410644	-695764.4798394211	-934524.4906248155	-1002640.9802177935	-1012844.1219996818	-916764.106741285	-654677.068561482	-888159.5564238501	-954527.9000975523	-967698.8142698968	-873986.370708996	-622585.0778579458	-840196.9527291468	-900238.8332964343	-910171.2888985772	-817952.5156631231	-688110.3669556341	-852276.2502384123	-911642.8754857405	-916048.9557410557	-815533.2802228744	-753667.5828677092	-986566.4268002389	-1050728.4985159836	-1057284.1758033922	-955773.3357348136	-713574.02150314	-941189.7844258543	-1003563.7744081725	-1013114.0748775871	-913576.2427197574	-679647.4688773212	-892053.9450459757	-948529.7139008752	-955263.0858534072	-857112.4619157428	-789469.1471029139	-908795.6277297178	-950251.5237353024	-932796.8646802176	-814388.6265058271	-811570.6233959972	-1038608.300441683	-1098816.0271779085	-1101724.229641082
292	-587166.4775216533	-819338.2777733856	-920703.3457699745	-973431.8484167457	-797462.1685329417	-656464.0483681605	-930243.570186685	-1036421.5894247993	-1100223.2789825038	-1060859.890678328	-593587.6258734632	-857050.7774757035	-963762.2604849207	-1032369.813805189	-1002583.5159759433	-547803.8758271241	-784882.4432567479	-880413.6237821253	-938274.3577417085	-904366.9710540725	-693576.7681860114	-876978.7154524568	-958091.2631064475	-997694.0332185703	-929931.6175965073	-719019.7788005726	-983457.7181186583	-1081816.896614203	-1136899.148420259	-1086349.6735989254	-659287.1374805399	-913580.9844283272	-1012258.0169626846	-1071976.3197771008	-1030080.8613283137	-613209.5289119506	-842345.124426878	-930551.653595112	-980300.5929746402	-934298.3075733406	-799987.0588503694	-934619.1530894997	-995479.1371498314	-1021956.1555203949	-1062401.0666600731	-781575.4403446905	-1036671.8035086034	-1127212.216580195	-1173575.017858014
293	-677597.8950667642	-781262.6390194676	-814627.9035340067	-802959.1568415969	-707938.1850198547	-983348.8324007494	-1113503.5776102927	-1086910.3806769485	-1004111.4314251387	-803948.7389711437	-1019705.5786933075	-1182187.8788829218	-1147410.55306305	-1060608.4985826511	-853853.3526293392	-991059.2980268716	-1195272.045850804	-1171781.6340087862	-1099439.1733513018	-902403.4505348066	-737878.8358290748	-830039.9396391157	-856983.0836404404	-832389.5349424636	-704002.2281487501	-1006922.9717152008	-1143280.8338408289	-1124179.3812557608	-1049120.6513988334	-855037.8658066251	-1035316.8042851419	-1202795.0402672738	-1175748.6923232917	-1096954.62231082	-897576.6115190254	-1001755.3104656832	-1208602.1280909162	-1191644.810493293	-1126019.4512406038	-936412.4006300583	-798159.7809332347	-878817.2380935824	-899338.2012526173	-861819.8504342098	-700066.2723688511	-1030497.0485296523	-1173057.9924804938	-1161448.3818920052	-1094129.8801021718
294	-572991.2774671619	-799335.2632024855	-884166.5250247908	-911466.9598384649	-836814.944251618	-645275.193076909	-903564.8186956819	-988693.3317987608	-1018661.5495559742	-935457.5368293498	-590367.6285122827	-836991.4537233323	-921996.2574046913	-955714.1844614245	-876365.2798282017	-556986.1915877593	-778109.783260088	-854468.8108225446	-881339.8812778041	-801125.834741046	-681134.1851252097	-856768.9683740827	-921250.355986112	-927088.4412633866	-836453.0061469201	-709112.7878234371	-959433.1778112318	-1038622.4004610676	-1062839.1045345934	-972282.6567237035	-656767.6613010616	-895632.333187993	-974600.6146998693	-1002547.1083410084	-915153.4256293832	-622121.1848738076	-836667.1891992937	-907677.7279475841	-929491.190868138	-841142.0145061954	-789277.095093701	-914202.668954799	-958334.119886558	-942709.8464456714	-836091.0772239841	-772950.320099971	-1015301.4836085436	-1088551.4599716184	-1107016.6686349628
295	-589986.1691634884	-800474.3283226744	-885113.0655398187	-817765.9646780794	-830168.455778938	-683869.3538007147	-927595.9954366825	-1008438.7636731691	-1034307.1833962707	-928011.9827489606	-640958.881487618	-881833.3389252335	-961553.4016158521	-991505.8214959523	-886758.819837467	-610949.380907242	-838328.6237095211	-911069.2572708048	-935795.1624921411	-834096.1766029628	-691944.408421494	-860697.5800664776	-936986.8047711452	-942041.6833542004	-846379.2085645092	-743588.9834972697	-981165.5945700434	-1057147.610685144	-1078267.6986303031	-967415.1060094388	-701470.1095524984	-936079.2046573871	-1010809.5494246613	-1035970.8582323381	-926392.2010433915	-669089.9176288393	-890707.9269017882	-958799.6400558202	-979158.7002092997	-872465.1160581708	-793902.6530693402	-920920.837235581	-988860.4868923125	-1066317.3395374136	-862589.9613146208	-803308.545303984	-1034735.1204237231	-1105856.4576971189	-1122228.203049195
296	-599210.828343248	-768878.2727184832	-826856.6896655906	-832096.4307455559	-744482.4356742596	-761413.546753827	-947382.3393815095	-975908.037878482	-947677.2509212722	-803893.3453025012	-749905.7125693385	-946844.2134282128	-970395.8519780352	-942127.2969429304	-797331.4519470775	-731972.0682875051	-937742.9706322486	-962381.9293853422	-938943.544640305	-799550.4672554825	-689342.7533999004	-827100.3915549424	-871401.6017390845	-860148.972841228	-747919.0146403353	-811670.5168681187	-997222.9802707187	-1026806.9613406828	-999871.7046070342	-855759.4272599964	-797410.5281581978	-993395.3442225101	-1018092.6037693286	-991258.213639321	-846484.2429990891	-775188.3441812235	-979366.0991968554	-1004858.1280717751	-982510.6144227199	-843101.57248832	-779474.683240794	-885322.5080166265	-915946.4501204604	-888201.4512321671	-751355.5945840741	-861927.4244824104	-1047063.5586283904	-1077705.8848028835	-1052066.1582927962
297	-589209.3671082361	-832217.7660095601	-923954.6298420846	-956722.3284442371	-886047.8298738966	-678173.0133183608	-955173.4754405263	-1056398.371368886	-1102556.6837770655	-1035876.4493371017	-615973.1948036079	-875489.9244802201	-977960.0066111928	-1028935.7936809737	-967143.7420952223	-566003.9683145185	-790682.0106771559	-881879.9307900608	-922786.9536385273	-858261.0028915654	-696824.1850359704	-883594.2253887119	-953157.6675720807	-963350.3829446809	-879020.7104945848	-738046.1925845093	-1005027.8129243525	-1098382.0331104589	-1136848.4487090341	-1060896.51122809	-679674.6891882949	-929587.3093991139	-1024036.4064058118	-1067253.1392238818	-995207.5605859256	-630377.8508555264	-847133.9298463705	-931263.6840750338	-965414.8214533202	-890534.735519721	-804439.0062422834	-934970.6782532854	-982360.6363300774	-969978.3554439684	-871993.6041444297	-797919.3093932368	-1054882.1009373353	-1140365.6818654542	-1171140.2265850017
298	-678658.5753803431	-781709.682719483	-814816.0079994771	-802955.4088047689	-707853.9360663679	-986432.075555915	-1115968.9515691528	-1088833.1843740544	-1005485.5824004033	-804749.10863033	-1023335.4890695522	-1185422.763896736	-1150067.3894134462	-1062678.1616067304	-855290.1564855532	-994431.264302818	-1198581.6329554785	-1174614.309484626	-1101785.461381772	-904162.2105831903	-738575.9499249621	-830315.9259348442	-857071.0042165237	-832329.1391193682	-703773.799851463	-1009638.1913293445	-1145446.8752357995	-1125868.14482086	-1050326.3449885005	-855735.2942150941	-1038523.1495120011	-1205668.1763163607	-1178110.6248944998	-1098796.2591705248	-898860.5175635712	-1004710.9165230007	-1211539.787070742	-1194163.1217936138	-1128108.5260154007	-937989.9447718202	-798493.3288435654	-878922.1669689988	-899325.9379393561	-861702.8068240393	-699693.6647358396	-1032844.244602774	-1174924.7010518587	-1162903.1053255224	-1095167.1163708519
299	-614907.9272721438	-806380.1886748954	-771611.1470674907	-882295.1597361278	-796149.2583780456	-750270.6696103328	-975992.6753420052	-1034602.5767824126	-1013716.663769843	-879239.6893921326	-724007.271434978	-953203.6209242225	-1010553.882423631	-988781.9021480192	-854287.0197744595	-696726.2564898654	-921741.7735196329	-974723.5532576038	-955667.9038335478	-825941.7138983088	-711343.3649707629	-876185.7749150522	-928440.7210249966	-920686.4460365042	-801734.2994974949	-802780.103170963	-1024331.9146364208	-1080482.1065779005	-1059624.7812079405	-923451.8185391468	-775457.8371194032	-1000128.8336463422	-1054968.684786559	-1033396.705901111	-897291.4573935266	-744929.7107764441	-965403.3385707155	-1016027.4322892675	-997100.5187132632	-865685.6934928555	-807778.7966408669	-945991.3611155478	-1085270.2264817501	-959077.6637687043	-807319.3466057981	-855289.4742315932	-1072671.0913911753	-1126361.6363337268	-1105532.8865493464
300	-605837.6262960228	-823002.9676761111	-903527.4945229515	-934164.8769799125	-852095.2239254994	-742693.1028036843	-990592.7948378933	-1066495.0260153997	-1083563.737568348	-997145.158551587	-700302.3357904386	-940197.4882534661	-1014949.0667048448	-1035628.1012306832	-951932.8374898433	-654278.2731517853	-873698.5206841718	-940687.2055884709	-956643.2871233816	-873677.3893701661	-704269.9425314409	-873930.953609829	-935849.0135583797	-943514.7412474946	-844879.268399839	-794995.4832802016	-1036021.4773192347	-1107014.578829148	-1119516.6575195706	-1026700.0477730992	-754126.9379349815	-987242.0593891508	-1057019.3351056569	-1073134.59141224	-982503.7408472595	-707743.1599295929	-921290.0379387194	-983868.034175207	-995826.7347357894	-905804.0229080482	-802702.2552449569	-924858.9395435466	-968170.4630036631	-952864.5571490255	-837663.3057840341	-847297.8012567188	-1081450.0972542353	-1147534.1457768448	-1155469.5775171337
301	-585499.237868151	-771163.1073282338	-820698.068448977	-854589.8079733971	-769620.0414614035	-697595.813981566	-912991.0391640723	-957889.7517159715	-950743.3839012295	-826399.763246082	-668651.6377612505	-886213.3452009227	-926772.2709282417	-921791.6255550652	-798953.1905997528	-650275.0161234101	-863332.2189583025	-899682.8796750928	-897147.187635922	-779339.4509399271	-684912.2481167704	-832026.9118767697	-865695.8754925298	-880241.4572492986	-775737.6513536494	-755724.2867075483	-967774.9063650758	-1011322.9559382888	-1003095.0241446272	-876242.4866018081	-725922.3129043564	-939880.0212901495	-979185.9462439921	-973147.8305910678	-847776.1389228699	-703718.8855678828	-913200.5306980334	-948439.2597421574	-944797.1687619878	-824338.3010262205	-784325.2623346584	-892890.7144145577	-910693.6210414568	-905893.0420405656	-781855.2652673913	-813852.6969335306	-1022558.7110921931	-1064756.1681252571	-1055446.65639726
302	-619505.0257761314	-754024.7122362383	-839395.5615274332	-841934.0274509289	-751816.3776833777	-808284.9569432804	-987766.0825252659	-1010582.684337838	-973159.3459516934	-822116.7234278662	-799995.7136051643	-988792.4284896792	-1008045.3326312932	-971173.2374845694	-818707.716943721	-775329.4138239713	-971823.0593682278	-995419.0784337248	-966274.5535787513	-820140.8606445014	-707188.8905450654	-811114.5559821427	-881696.9459034154	-870024.1449944136	-754399.515435091	-853780.4867616657	-1033401.8070167692	-1057908.352966553	-1022691.710139144	-872023.936580303	-842379.3318563278	-1030877.9548943717	-1051838.1743395934	-1017294.2951853278	-865591.7267713081	-813569.1803942983	-1009174.0549007317	-1034065.4395509092	-1006792.313691664	-861360.9070959755	-794872.7524439311	-868204.4004455642	-923998.2720920529	-898114.2014842617	-756982.6531868041	-899275.9425242497	-1079037.4690460365	-1105234.0216330322	-1072224.0627707934
303	-604151.3460285624	-818532.0771359812	-899174.7136453711	-894497.276448034	-849072.6393773428	-725574.639973114	-974436.0782982804	-1053682.5171234831	-1071816.0253621521	-984716.7376304874	-682059.8499890598	-924936.9109195814	-1002146.1961281557	-1021372.8284356693	-939157.0581442505	-640092.202280606	-864676.4011978817	-932599.3770104912	-944083.7898356488	-864863.5975106704	-703887.1204884204	-873266.4219300386	-933458.4716765498	-908110.5414568315	-844977.1086903685	-780207.1084273605	-1022225.0834989822	-1096369.17910487	-1109972.5454107774	-1016654.2940667677	-737975.0654127623	-974024.3211344877	-1046088.6158858904	-1060911.8525597497	-971910.9899381173	-694992.8370817911	-913517.7844768318	-976837.0719286111	-984532.8262937209	-898339.696262107	-803622.894905363	-928000.7666811803	-967742.1672077284	-921723.7373995495	-840881.5780033942	-834839.5143386915	-1070014.0130675253	-1139055.8541755	-1148129.0392809156
304	-635006.5367538172	-763311.7086918753	-807074.6147753184	-803109.658342817	-711321.1811210448	-859541.95835356	-1014507.0898722361	-1009700.6689660047	-948932.7354369978	-771810.091255331	-873947.4162203406	-1052291.863127093	-1040725.9398672322	-977501.6865516294	-796158.845545534	-855658.8177507645	-1062376.3859252757	-1058036.2437802346	-1005224.5519127776	-831780.8713766718	-709886.3899782072	-818957.777501902	-853452.6544327821	-834814.7144325807	-713174.7105018452	-897893.9928571634	-1056303.97192229	-1056367.493747176	-1000706.3204871309	-827032.7988109927	-906566.7966873042	-1087424.9656256468	-1080905.8681815825	-1023004.1450842181	-846021.6786298725	-883073.6728341084	-1090641.150962162	-1090522.636769149	-1042133.1651119496	-873066.5018365157	-784766.2462540681	-874603.8447902295	-899830.6315942821	-866519.7079456539	-715028.2406495498	-936245.9648607669	-1098100.766810323	-1103034.3185687105	-1052479.9116724965
305	-644893.991134633	-829501.660150075	-857214.0753803722	-913882.5097226382	-827955.400992923	-849330.3983648185	-1066765.4242824446	-1109558.0116488317	-1104177.846902196	-977855.8699261281	-830314.5025020386	-1049855.536745712	-1087207.4491619472	-1085111.2894470314	-960428.4502761448	-783428.5472128817	-996968.5248275637	-1027989.4012822214	-1030197.0451530775	-912210.4283517678	-732720.6279374788	-877578.4114569868	-889577.9225824038	-926274.9690998642	-823139.9971533784	-889864.8840119705	-1103645.95659286	-1145063.9890281742	-1138647.7798175372	-1010122.1485539154	-869528.1670736908	-1085177.7962310223	-1121331.941335579	-1118144.1324011309	-991206.8100234692	-821206.7282767437	-1030931.8773457634	-1060994.5717669178	-1061977.8541512196	-941558.5722155836	-820547.2733130584	-925655.1584211324	-921941.7094558184	-938667.3616907233	-818324.6019993668	-930399.3071591224	-1140526.4264596747	-1180569.9836093832	-1173117.6954746118
306	-573933.0655624239	-801244.7574999947	-886477.0291765908	-914094.9492221016	-839673.9089386198	-647185.5768612608	-906561.7449434975	-992624.9785998059	-1023533.35877694	-941288.8855536438	-591854.5494776558	-839227.0685366088	-925246.0848464777	-959966.1796966867	-881636.805449367	-557509.8559005699	-778839.855320014	-856060.580693999	-883746.7220461481	-804443.6867430893	-682045.3069316397	-858326.7170527396	-923103.2207111521	-929194.1803326812	-838924.9222655568	-710792.957113559	-962080.8684768823	-1042092.6557039473	-1067136.8437149907	-977428.4830876271	-658097.8775373435	-897604.1062561078	-977471.3621885624	-1006304.6020363702	-919802.1871633946	-622600.6513153078	-837274.9951712528	-909047.3696987279	-931577.2841363631	-844010.26087014	-790157.5506675185	-915408.671902894	-959729.3450738586	-944293.3348662251	-838175.9449976747	-774400.2748965932	-1017599.938915448	-1091560.3234336437	-1110740.3379967506
307	-644491.8537597192	-767309.4742352277	-808756.7714651063	-803076.1408757655	-710567.7702949862	-887114.3931000325	-1036554.1225535326	-1026895.6733171567	-961221.3180075309	-778967.535248678	-906408.5170637381	-1081220.3814005554	-1064485.1580724602	-996010.0058137677	-809007.7123313297	-885813.208900573	-1091972.9405559127	-1083367.93375242	-1026206.6380995848	-847508.8870498813	-716120.4532526182	-821425.8326460912	-854238.899378423	-834274.6143472312	-711131.950977463	-922175.3134879706	-1075674.1714217765	-1071469.5537721543	-1011488.443774956	-833269.6728799831	-935240.0929838099	-1113118.4812663007	-1102027.8583775526	-1039473.3009650444	-857503.2303117535	-909504.6907754372	-1116911.6740614935	-1113043.0707748383	-1060815.077309528	-887173.9629478906	-787749.0560843622	-875542.1893919487	-899720.9647961562	-865473.0252347843	-711696.1324990676	-957236.1713759088	-1114794.1308054407	-1116043.4342713165	-1061755.576255403
308	-634179.901472923	-759735.5356877444	-848037.24774057	-848558.4468300432	-757412.1651375211	-849875.6442578125	-1023475.092199216	-1042176.3506479843	-999801.4463343476	-843867.4049763682	-846617.414107311	-1030754.5762246572	-1045862.3224522074	-1003926.6846330999	-846085.4070858293	-816634.9348309843	-1010347.9538571748	-1030956.2063935152	-997933.8285799657	-846895.7355810078	-718123.6143386177	-814276.8640792131	-887998.4043660002	-875099.7505231949	-757763.3166287846	-890583.3728796752	-1064877.1796162415	-1085788.4390986462	-1046193.240181714	-891175.9689531294	-883756.3141260659	-1068122.0003702135	-1085455.0409281887	-1046425.5725574233	-889956.2594821469	-849930.4506876504	-1043181.8468070256	-1065522.839666575	-1034867.1341366955	-885141.2368679988	-802067.3238400071	-868818.193311758	-927959.5035467416	-901640.9934117792	-758114.4681200483	-931291.0254557827	-1106279.2045775342	-1129400.5275935752	-1092585.0204833252
309	-585810.3011048976	-740912.190684414	-819553.5373997261	-826723.8143153696	-738967.9882672189	-712789.3093544611	-905775.251794806	-938041.0213165998	-911986.886599743	-772175.3650592436	-692948.4448866968	-892443.8771453667	-921214.4056620686	-895968.6220243623	-755846.2828482776	-680488.5315916636	-883366.7249082905	-913822.9022921213	-893582.2475928119	-758709.4616176616	-682081.8630517909	-803853.6358314054	-867228.2776631501	-858370.1361724195	-746675.9505196444	-769278.0255159993	-961131.7561095856	-993893.3762511766	-968730.2592554234	-828049.2910003046	-747374.3686721988	-945362.5553856882	-974651.07664854	-950406.4802112832	-809648.7505991505	-730080.7054971189	-931089.3604450425	-961836.6549485333	-942330.2109362392	-806759.3090439625	-778353.4232634244	-866795.0814122118	-914902.9580340298	-890016.396403949	-754383.91277207	-825766.6721908345	-1016488.1979471976	-1049745.7312085857	-1025473.6249244008
310	-591046.6600693138	-742949.9538786215	-822637.1049886307	-829087.5711550586	-740964.7037695436	-727629.8962769995	-918517.1105185221	-949314.4236417778	-921493.4476127326	-779936.5467320507	-709584.2218707646	-907417.0103424166	-934708.4438909086	-907655.8628661528	-765615.3204989325	-695227.3641156245	-897113.3610487583	-926503.4293648336	-904879.0607232817	-768256.2633835014	-685983.6432196666	-804982.0256518357	-869476.79405206	-860181.23788528	-747876.2380654506	-782410.2064367931	-972362.9483101179	-1003841.6812292145	-977116.1870178516	-834883.2103107193	-762138.7003439148	-958652.1528874366	-986646.4069228033	-960801.24120034	-818342.6190795565	-743055.3069582939	-943224.1825510625	-973061.4341218865	-952348.0019383025	-815244.7194522927	-780920.6244584037	-867014.097902954	-916316.4234879431	-891274.8430788551	-754787.7723613576	-837190.4463998189	-1026208.7236268666	-1058368.9388418042	-1032738.9187262028
311	-608945.4668565902	-776077.8684371089	-832501.007978739	-836389.3253546059	-748255.0882327477	-790599.038376301	-972419.3615094924	-998217.8142881208	-967053.9826244736	-820099.4449321841	-782989.1562375994	-977091.3195884922	-997678.2837958711	-966290.8689681381	-817964.293455885	-761436.1598763834	-966176.9734152604	-988370.8364145078	-962411.5475404161	-819758.8514196926	-696187.8707871945	-832250.7461122473	-875344.6571879913	-863087.6681457177	-749876.2224075014	-837401.1570626134	-1019204.2214917729	-1046419.0638208153	-1016913.0673084955	-869996.5727362805	-826695.2206341799	-1020203.9289545522	-1042303.3027649465	-1012719.2283195276	-864833.6826006706	-801093.6097462198	-1004507.5836877517	-1027869.0251705996	-1003314.8141473283	-861069.5126294504	-783430.2802193861	-888423.6210565385	-918188.2425263801	-889785.9470514595	-751497.3577065082	-884203.2132489257	-1065989.018937787	-1094620.3133535096	-1066772.1519925175
312	-538693.3284639003	-753147.5588955163	-805991.1529523807	-806693.9377230136	-717438.4990374235	-729920.3754042815	-900844.3606112963	-912863.7367957297	-875356.8041220556	-726331.1961215993	-717908.2155388434	-896024.2769092985	-902510.8402723406	-864990.0547097452	-714547.4038500878	-712754.4944336447	-900571.957544305	-909712.8748195503	-877976.030484855	-732905.6108136268	-703267.4678598853	-826875.7178072287	-859240.7202709672	-841828.0001081888	-726448.2828620188	-785465.8969365016	-957530.8664039505	-971865.7635308325	-936375.1588820057	-787427.6569305406	-770539.2392133942	-949385.1096645088	-958368.6447048122	-923030.9788811578	-773018.8179795151	-759541.9698602619	-947433.4174206996	-958802.520150887	-928914.0428839903	-784229.6598689063	-867841.6072518256	-900603.8767189409	-912490.2243190508	-876961.9999428062	-735458.0662983293	-841011.3683250796	-1014217.3096966046	-1030867.7964542258	-997393.5136419557
313	-614886.3372994304	-836065.0074032419	-927985.0791327468	-824158.922131369	-879722.4096843079	-736220.5773313623	-993398.9661564345	-1089498.6037728072	-1130806.9985627648	-1031817.719871274	-690893.4630328575	-942952.7756480712	-1038943.5472482177	-1085624.5563637349	-988254.3388082515	-644694.3086484055	-878662.2723522193	-965616.5300052976	-1004358.0270082356	-909791.4649927536	-713516.3318856901	-891073.0050882231	-978062.8006652403	-987413.3871500624	-896231.0369784479	-789869.752634235	-1039524.7117734303	-1129185.211692318	-1164123.6016831072	-1059778.832079125	-745893.1178558896	-990386.5291256828	-1079738.3834438594	-1119945.9925080542	-1016824.0822472824	-698895.9831240174	-926033.3833075293	-1006816.7832997286	-1039688.3914731796	-939163.8001450156	-812146.3342713047	-946081.0106238707	-1028140.4674970885	-1150667.789679018	-912739.6642212765	-843518.8576377529	-1085650.3792917167	-1168871.8196118292	-1197440.1891534287
314	-586482.2211634789	-772720.8878542362	-844996.8448104175	-857516.234561164	-771572.2667590197	-711093.2797045413	-923939.6537376271	-967912.0152833376	-961325.1497548632	-839893.1901147817	-684198.9714988957	-899672.1602769302	-940608.9868291075	-935033.7802094577	-814585.4037965827	-663275.0495277222	-875212.100085139	-913828.0925796707	-909072.9195785888	-792451.9207978684	-683427.2002422193	-832582.3879295763	-887736.9350219242	-881490.5256996464	-774712.8952114157	-767266.272172625	-977016.6645956106	-1019728.447440869	-1011993.7022592174	-887781.0105763443	-739474.7866057045	-951576.7653088142	-991277.4313792477	-984641.8378440948	-861407.8183770714	-715114.6028267758	-923677.0041074677	-961123.1411061184	-955318.4691448043	-835841.8255531606	-780372.1815448146	-892443.8879788556	-930476.9671348108	-905464.7543612939	-777853.5236811856	-823439.1933089927	-1030093.6129535942	-1071544.888430116	-1062662.254792528
315	-541211.8963659954	-771601.579033845	-815581.3832043882	-808539.211464909	-716362.356806804	-823176.7116771048	-969687.1262104386	-961875.3667570088	-907885.4000681103	-743777.0638282632	-825735.5631127282	-982280.7775341406	-967711.7384630033	-913013.2478453749	-745883.5986492533	-814089.3561568335	-987718.2252197112	-978679.8956771591	-932589.9524013678	-771848.5780058169	-737320.6319028836	-846380.8209498904	-867321.0183280788	-842558.6219217258	-721637.0652431215	-868574.9196527347	-1018637.7327574958	-1015225.2357373688	-965044.722913793	-802643.6269312369	-866815.5104354001	-1026426.0066378004	-1016524.5684139493	-965844.6083927453	-800976.8562215404	-849351.555911732	-1025022.4923386873	-1020197.2647620784	-977586.4366284189	-819074.7501637073	-933429.3674334154	-921160.062865936	-919060.5897408628	-876577.9697990867	-726911.7730692183	-913973.084547366	-1067588.2768045533	-1068575.1144431205	-1022204.0457594758
316	-594421.2253300912	-832848.6936813194	-938743.077053695	-996750.205519611	-808182.6348470057	-668770.2294896202	-950801.0224931493	-1065137.0549308618	-1138881.3236246104	-1110942.6878850982	-602412.9568149324	-872407.6532861055	-987815.5024122484	-1066860.132003041	-1049621.8494213184	-549496.6442891109	-789927.9082748373	-892947.8231274838	-959655.6909817405	-937237.7697822853	-700420.9084624372	-888534.27959553	-973592.447899527	-1019253.2882967176	-956693.4956481403	-729852.0990884305	-1001681.9664135764	-1107308.9365721042	-1171291.2816108787	-1131012.2141954112	-667132.827578919	-927160.6945161773	-1033610.2526172934	-1102687.1151859625	-1072058.8923750904	-614690.2335790186	-846551.0383791418	-941412.1415008941	-999033.1622229549	-963250.557004059	-806420.5915947832	-944219.8654619463	-1008441.7780873432	-1041756.3085738241	-1105204.3564492748	-790933.898922511	-1052562.847786209	-1149480.8327428065	-1203701.239597147
317	-639577.9776322684	-761836.2321815856	-851216.0467496736	-850995.2048005194	-759470.546242281	-865174.5607380695	-1036610.4643670996	-1053797.915315302	-1009601.6034111081	-851868.2792558112	-863766.9624366236	-1046190.132474898	-1059773.1040757354	-1015974.8686069867	-856156.14700265	-831828.9543786965	-1024519.1345048958	-1044028.3527731465	-1009579.5270606406	-856737.3761866997	-722145.8952109461	-815440.1025488264	-890316.362854972	-876966.7854313778	-759000.6732785875	-904121.1217678764	-1076455.2305617002	-1096043.9827488763	-1054838.154908908	-898220.943744798	-898976.6203249639	-1081822.027417439	-1097820.8292205874	-1057141.3603516577	-898918.6252205311	-863305.7535078966	-1055691.434929907	-1077094.2795280037	-1045194.3097839388	-893888.7066153437	-804713.809243516	-869043.9738025939	-929416.6217887639	-902938.3053492879	-758530.8003148942	-943067.606019934	-1116299.9343029603	-1138290.0502291098	-1100074.6921289589
318	-637694.3391653666	-822430.037597432	-852787.7156978289	-906695.2281289801	-820884.1655212542	-830937.5919436968	-1048125.3593987172	-1091173.2448765612	-1085578.9863472583	-959496.819728141	-810718.220027959	-1030019.3262756641	-1067759.9831252168	-1065314.1748014982	-940854.9087193522	-767288.0797540486	-980769.5368731839	-1012436.4736218624	-1014069.1446904525	-896104.211193335	-726925.4410397527	-872056.7967415535	-886683.0132191258	-920694.9263179675	-817394.0284690124	-873604.7673782955	-1087176.0797007072	-1128852.3063575318	-1122216.4856265958	-993893.6617127698	-852120.7006914391	-1067565.2403409483	-1104101.4346459922	-1100568.120170228	-973820.5788018409	-806965.208081709	-1016660.840341304	-1047350.957991225	-1047773.5666354962	-927349.4862291503	-816156.5509288543	-921683.5518255887	-920578.2502704657	-934694.557999597	-813903.8995369428	-916271.8803128942	-1126226.7375554254	-1166531.3839206616	-1158853.9687710453
319	-546440.878062801	-809915.310204456	-835492.3565850076	-812370.3182672866	-714128.0997822513	-1016792.9628316164	-1112616.5906000775	-1063631.9704939756	-975420.3800395497	-779997.6965327263	-1049603.7488423677	-1161364.1616361132	-1103080.0574869404	-1012717.6861174082	-810942.9480184178	-1024478.0205871593	-1168648.9193020696	-1121867.3354311758	-1045977.8812535756	-852700.899874077	-808020.8784005187	-886876.7818657903	-884097.1118414691	-844075.5189198544	-711648.1469981001	-1041123.5963277105	-1145506.1350134087	-1105246.9843519377	-1024567.686520573	-834234.6070936527	-1066701.667817845	-1186376.2068463045	-1137266.304375458	-1054733.0933542484	-859022.5694717283	-1035811.7586603528	-1186110.8045818221	-1147663.351971765	-1078638.7274233643	-891419.17225512	-1069600.87872708	-963838.2535271246	-932701.8024726695	-875780.6569329693	-709168.1931429513	-1065454.2014060728	-1178395.61692674	-1146862.0152789245	-1073714.9930015963
320	-586058.681991996	-741008.849724276	-819699.8030126003	-826835.9365026979	-739062.7002552856	-713493.2561560327	-906379.6477490532	-938575.7626682094	-912437.8197908606	-772543.5081147377	-693737.5445402829	-893154.1111326467	-921854.480417943	-896522.9933475935	-756309.6663279543	-681187.6517860532	-884018.7813662972	-914424.389047441	-894118.0994100381	-759162.3035843156	-682266.9396720045	-803907.1597526064	-867334.933547349	-858456.0437759896	-746732.8848298066	-769900.9359713002	-961664.4952706894	-994365.263077951	-969128.0364496398	-828373.4503927784	-748074.6983904166	-945992.9327221344	-975220.0618527262	-950899.5441843956	-810061.1346202145	-730696.1413453055	-931664.9622897512	-962369.0899147966	-942805.3937555929	-807161.8050872891	-778475.1956083882	-866805.470216843	-914970.0042021234	-890076.0894279764	-754403.0694043277	-826308.5462661837	-1016949.2803152679	-1050154.7635106351	-1025818.2460880348
321	-578513.4817301838	-803223.9241005565	-899186.7165226123	-945619.2143730931	-784675.4869903673	-641786.0283645983	-905723.965510107	-1002171.6321919587	-1054114.453916866	-1001124.3568047514	-583061.3397073145	-838734.0853912494	-935073.1031683446	-991231.9843322836	-946479.2223343145	-545784.8506639798	-778864.537642337	-865463.6383314005	-912772.0809669301	-865160.8000653796	-685413.518604922	-863195.9830214591	-939602.4485647071	-971979.5427380815	-898011.7736174706	-706099.6850443617	-961721.0088680341	-1051411.6337027713	-1095878.427698312	-1033079.0726046043	-649929.3037976809	-897383.9811220411	-986790.4459131575	-1035346.4615873403	-980012.1703726538	-611443.4397809616	-837328.5812348609	-917597.9633189684	-957957.5912398939	-899765.9297302134	-792313.5554796603	-923168.0419072107	-980018.1341707673	-998339.80860307	-1011348.060244574	-770413.273881187	-1017717.9896908102	-1100651.6458994597	-1137642.401479758
322	-633961.9211662909	-794579.6707481513	-847005.9976603542	-847421.3736116076	-757950.198146325	-865601.0548023941	-1036760.4789795656	-1055550.3491784947	-1016849.064656548	-861746.5128093071	-868008.2820942261	-1054821.5145230242	-1067789.7427979666	-1028387.3602450625	-870987.3755330399	-837154.133378919	-1039247.784466764	-1055158.1448865267	-1022720.5381090848	-871691.1464323886	-713778.7208356148	-845486.3284386981	-885477.6751057082	-870639.6421316173	-754905.9313807514	-903524.7613343783	-1075692.4738211564	-1096819.0108695892	-1060706.6268548353	-906583.7453179709	-901952.1672886391	-1089097.6772059817	-1104520.902771323	-1067870.5821629558	-911988.7892615314	-867665.9731163818	-1069117.1526185875	-1087003.3273954827	-1056778.2592611073	-907244.2270745687	-793595.5278499902	-896392.9824833492	-923949.2882208516	-893857.8463020491	-751861.6661161442	-941448.4053663625	-1114624.406114329	-1138087.6725606837	-1104564.1890531224
323	-655007.8423765703	-810144.9250749953	-859208.8009120051	-856702.4497997238	-766106.5306481305	-928698.9866185568	-1090889.5762566088	-1103783.244102397	-1058740.827579164	-896783.4888063894	-939533.439176601	-1120214.6169187329	-1126773.3311126246	-1080628.0913522756	-915594.800466527	-900854.3878117967	-1100721.0257631864	-1111345.1814084724	-1073457.4750093515	-915380.9106002215	-728577.6063834095	-856621.2006858268	-894002.412227864	-876992.9905127144	-759137.3407344185	-959153.4347033147	-1123215.0880618799	-1139219.636532173	-1097549.410101402	-937363.916717503	-965264.5676075676	-1147056.82599783	-1156863.5206106193	-1114268.4862487856	-951659.5854167631	-923672.1799483078	-1123472.093583231	-1136752.0187984505	-1101756.1541923797	-946090.2357890124	-802147.3792861754	-903097.4718809478	-928795.9588270714	-897283.4664855967	-752168.1526385953	-989607.8202880728	-1155540.5373085092	-1174656.0289619486	-1136357.9926236402
324	-609523.3168764296	-794759.9727943197	-835468.1177772525	-878572.6090307074	-793215.615300624	-758969.6465683696	-975189.9334158651	-1019236.7572894654	-1012804.7859444331	-887660.9567532373	-734041.2760987007	-952403.5846168753	-991665.332783402	-987851.4085015885	-864266.9461589855	-704133.1563664131	-917385.632669331	-951580.494242785	-950963.3938366836	-833083.3034470247	-704249.853391724	-850451.6508423623	-875355.7217687217	-898861.1612619527	-794911.0233779607	-809981.6769756837	-1022732.2328306802	-1065418.7298728088	-1057923.6063506184	-930394.3333467313	-784008.224485411	-998650.2835260307	-1036681.371832666	-1031796.1525222061	-905791.1921931689	-751240.5446458524	-960820.6826149239	-993965.8014006822	-992194.5883859836	-871751.7323741086	-798976.3957383035	-906143.3259363985	-915243.2647371942	-919149.6480775555	-796606.4373633099	-860993.6448829977	-1070274.469783859	-1111600.7141570863	-1103042.4150175059
325	-616948.7475824268	-781996.9773562248	-837141.4539392329	-839918.7055812643	-751356.7542540636	-814593.7334290313	-993003.4146671513	-1016559.6770385727	-982984.4584359165	-833423.2026279074	-810188.5316115892	-1001958.8153268402	-1020108.3884599906	-986156.8198189738	-834927.4731918714	-785659.9043938973	-989553.8359582057	-1009737.4766268795	-981705.6399740397	-836373.0658314608	-701815.547251681	-836485.0824261442	-878586.4190296754	-865503.700693541	-751485.3302524356	-858555.4645851566	-1037275.980802949	-1062543.0484512919	-1030923.5320487799	-881701.5653587702	-850771.4731353743	-1042244.4627842203	-1062207.9988011771	-1030363.2861765894	-879919.5757329076	-822391.4845784339	-1025177.5200155491	-1046787.3105268374	-1020418.8751193106	-875841.758031003	-786682.3530122847	-890973.1844724733	-920031.3201022998	-891088.6317719378	-751613.9074955792	-902517.1332412821	-1081548.484398593	-1108526.4198640112	-1078862.6056616434
326	-614841.6894678161	-800897.8523518371	-875306.3062106094	-886883.8334903021	-799962.050739543	-789511.8581668768	-1001928.9634019975	-1044411.3244410093	-1038955.8903942162	-918179.1123052088	-768382.535884996	-983648.2394666285	-1023287.9642314224	-1018741.0418648755	-898727.1965106385	-732718.4647094312	-944273.0691540996	-981622.9861358266	-977884.0604180965	-861824.05524847	-705017.693169578	-854224.2600344745	-910900.9166085733	-903735.0646617975	-796363.2608755223	-836379.9023627911	-1045691.1880405095	-1086950.723329761	-1080332.7031096246	-956770.5164738892	-814115.0881004257	-1026001.4193227724	-1064440.0094074474	-1058815.1031944293	-936009.0849617015	-776347.2427881539	-984524.264342373	-1020744.8827681355	-1015932.1104744759	-897007.688459946	-795193.700303492	-907550.6676768914	-946495.4712993386	-920586.2333690445	-792764.4710383152	-883247.8704284128	-1089453.3501790215	-1129490.1358488053	-1121709.5158697225
327	-544491.1736872847	-795629.4599878971	-828068.2510570238	-810941.8325450611	-714961.1760769072	-944600.2350816582	-1059323.1927132746	-1025690.4922010155	-950238.948245448	-766492.2895218355	-966131.1328409378	-1094590.231679699	-1052605.9462334085	-975541.3885457171	-786684.5922833441	-946031.4465918033	-1101186.1920691426	-1068477.7475544538	-1003699.4886654112	-822553.897100383	-781659.229433431	-871777.2545072038	-877841.8933642064	-843509.9210872466	-715372.6652194757	-976786.2301999509	-1098201.3454127456	-1071681.0230725799	-1002373.6553846963	-822455.4355797926	-992171.1113441514	-1126736.3719236213	-1092245.934337561	-1021589.6864518442	-837379.3533225899	-966287.2710568259	-1126046.6074902862	-1100135.706557653	-1040959.8627910392	-864444.4677190555	-1018827.2851702109	-947925.0490265106	-927615.4713870588	-876077.9470123502	-715784.1534628543	-1008972.1914330923	-1137079.4356122168	-1117671.5682749853	-1054508.3625239448
328	-579071.591574368	-765357.948443792	-837076.6613615645	-849842.169756778	-764153.7153624704	-690601.6741619887	-903560.2206808821	-947921.935148313	-941039.4145840594	-819436.2490618179	-662200.9140437405	-877728.3209022854	-919004.0938967062	-913160.185705141	-792598.2617219811	-645128.7492589054	-857165.7370383098	-896112.5684807566	-891091.8392955093	-774324.2469394417	-677785.3756489668	-826927.137412775	-881683.9411679672	-875677.7919466712	-769055.4252375881	-749206.1482167823	-959071.2838854571	-1002162.5544063575	-994135.997158489	-869753.3216134908	-719970.4848726444	-932128.8145476626	-972159.2744472116	-965259.5776046776	-841913.7168796654	-699113.8651314301	-907776.9702184628	-945543.3482068522	-939479.4823513626	-819858.537409807	-776499.1616316796	-888496.3263593974	-926291.1622508457	-901513.3516564406	-773957.1351276131	-807810.552193779	-1014582.2845900321	-1056403.181242199	-1047232.5797577637
329	-672338.0314237721	-685093.5512773707	-866775.3148159334	-860823.0917774474	-764060.9162862027	-899641.0255603285	-1085036.2156647013	-1079611.769663517	-1019652.024612058	-855068.6759936784	-901381.0709959979	-1100697.537307751	-1087085.317919659	-1025453.7711198685	-858269.8927438159	-870508.2653637156	-1079736.4364294743	-1071901.2615231774	-1019034.8209295224	-858749.0101129401	-772688.68479484	-894217.8222777564	-927189.0023402445	-890164.1888968786	-764911.9930156926	-936107.0361583999	-1121342.6964855406	-1120053.6520430925	-1064278.646135506	-901329.2856844589	-933809.0754939863	-1132327.3030308592	-1123114.978069335	-1065964.930550833	-900918.9704258301	-898861.8422695211	-1106611.2881573625	-1102687.9034927012	-1053831.430708558	-895639.8108487406	-873039.3300666432	-1103342.0932461713	-987602.6355171048	-919505.2235376236	-765763.0707575905	-972572.9679513726	-1157649.1311114787	-1160495.5344226684	-1108905.2676056696
330	-622461.9501408521	-844130.3433276077	-927994.4370463458	-918355.5928929371	-883078.9166698658	-767196.7513428659	-1025290.2383685384	-1113062.8576199017	-1138221.0461586635	-1060435.977979011	-722106.7858434664	-972065.9872892934	-1058156.1651008995	-1084379.0736815091	-1012393.2137129767	-667513.6342807978	-895228.0182502875	-970221.285550508	-986452.1049122231	-917304.8198935759	-719664.0120129525	-894368.5939668375	-956615.1315295049	-925817.4116445701	-873835.986734316	-816937.0448575864	-1067200.1532761753	-1148881.7599399658	-1168616.2623409408	-1083708.855639461	-773586.2025788303	-1015807.7296034736	-1095745.3550475677	-1116680.2174297709	-1036857.9078312241	-719255.9151348874	-940206.0305636623	-1009715.206669415	-1021427.7222940951	-944224.1753015519	-816866.0738308897	-944606.8445519041	-985235.7635126641	-933279.1596092333	-864593.0567987661	-866677.2758181435	-1109109.9891098724	-1184700.6787798062	-1199011.445483665
331	-599329.8652825324	-789855.763753288	-775012.2229078206	-867063.2293439703	-781304.0870615268	-714812.5848798747	-938199.3442001885	-994510.7806338882	-975985.4449571955	-843796.1048684514	-686377.0769574891	-912995.5424807245	-967635.5892597669	-948627.5586618233	-816692.2946715907	-665566.4560094201	-888190.8821210768	-938847.0721107197	-922193.2390784	-794799.8071323821	-698271.0098380048	-860063.9680767964	-912337.8849042344	-905201.9501278267	-788813.5428391158	-771339.0314409037	-990766.6610140712	-1044836.665157641	-1026117.8230931582	-892024.5570856202	-741960.6502690141	-964279.6760346683	-1016643.074480798	-997597.7634353294	-863827.3614145275	-717392.4966508311	-935701.6179551309	-984215.2184443758	-967471.1143623474	-838166.67010728	-797212.1495298282	-930272.1723683072	-1049663.4795593976	-943340.6035160363	-796323.0034483563	-827865.4155019325	-1043333.9152959562	-1095162.5496493962	-1076250.191469825
332	-578444.6263908565	-805858.9297158358	-895572.3111236902	-928312.7951195395	-828264.1587041784	-648368.8831749221	-911962.4317701288	-1004881.6725690195	-1045387.0794833794	-970710.2439139464	-590261.1172379149	-843343.678302985	-936103.0053155475	-979590.3505870568	-908082.1437593666	-552449.9726079694	-780335.3543308404	-863200.8115409215	-897013.4057627004	-821048.6990600671	-685902.5076338795	-863865.2105154729	-933684.468035985	-942876.9835563398	-826786.2393767099	-711884.8335147853	-967058.7849825114	-1053367.2477013082	-1087148.0023426139	-1004219.8376315021	-656508.5598051646	-901349.1299674156	-987367.0112498909	-1024124.4179896712	-943784.555948515	-617729.3323438677	-838538.2856262539	-915352.8715303984	-943219.4947551677	-858477.4722881314	-793360.3838393249	-921871.4912821846	-971796.5674529322	-957441.1195682953	-825308.3251197444	-775400.7213546486	-1022155.0756948941	-1101852.8228006714	-1128908.9051173886
333	-638891.3806753397	-797598.0139552334	-827500.4424620004	-808538.0704554243	-710815.1860640289	-1013985.6184696468	-1134415.264964916	-1094238.6787797483	-1003011.7033276836	-799476.7598949062	-1046390.8861510985	-1197265.9915502905	-1149946.9359339161	-1055788.9352712864	-845077.6833192933	-1008961.6085855793	-1203983.4205147615	-1171897.095937607	-1094086.3209853698	-892826.9994257308	-703020.080096648	-846814.2115366156	-871522.3423024758	-838741.6743535282	-706702.1293504053	-1035456.4788130024	-1163054.6630778941	-1131471.7413091995	-1048534.0874000867	-851210.601310951	-1060216.9175962964	-1216981.2187825392	-1178496.4400041546	-1092900.7038779603	-889603.7187721388	-1017822.2633112958	-1216333.5527002418	-1191860.2674065945	-1121372.337050246	-927553.6849437816	-767148.7761562841	-896030.4135495585	-915544.1807537646	-868945.2157574784	-702589.0743030019	-1056927.276597894	-1191694.0165808145	-1168704.7859487087	-1094056.489362432
334	-614281.0735960706	-805715.2538123939	-771748.0047134891	-881682.2342280396	-795551.8958680042	-748843.8534393213	-974471.889985451	-1032989.3023062401	-1012198.3777833579	-877813.4567024249	-722493.0506188528	-951585.6673047703	-1008826.8710753329	-987166.110797246	-852774.226228805	-695472.4011970891	-920391.701885386	-973279.9010172617	-954320.8995225449	-824688.578639946	-710817.3397260716	-875537.0412093936	-927792.7506918298	-920063.3574142504	-801214.3745020526	-801514.9296592125	-1022981.2650732386	-1079047.7512643551	-1058276.477427773	-922187.200746241	-774109.9265301863	-998686.2808918348	-1053426.4807740233	-1031956.1737797747	-895944.8783649614	-743821.6266055785	-964208.155706121	-1014747.3241984157	-995908.2458201643	-864578.3413085663	-807353.5998744309	-945358.8285670405	-1083837.428216076	-958444.4120794667	-806876.8590783894	-854185.9433791037	-1071490.5776216732	-1125106.2001831173	-1104354.565069552
335	-571355.3129711363	-773844.5955386179	-853035.2773270768	-812982.6126016673	-793091.0921268924	-644699.0111842197	-878360.7582360287	-947787.999564813	-962103.8886578552	-850342.2357131833	-603596.7238220329	-836102.4253858546	-903648.3840227951	-921084.1036684053	-810817.6290877	-585700.6800737948	-808150.0962605319	-870255.7820985456	-884494.911748402	-777459.2886619059	-675803.8184600254	-837970.0156471499	-906252.8366998256	-908093.5716784989	-809078.9686209376	-708960.6890393842	-937500.0131091896	-1003247.4852932423	-1014028.4142082658	-898306.5245573224	-668231.8328142181	-895445.2640817105	-959235.4722093144	-973138.8065818103	-858729.0686213408	-646788.3605924058	-864276.639585516	-922872.1521103261	-933869.0472580402	-822559.6863174199	-780252.3275359033	-902095.4393662692	-959470.3371595633	-1003204.4682600502	-825066.845091384	-773222.30080756	-996639.1983083729	-1058706.9710216715	-1065952.9325611002
336	-623631.4226379618	-697713.076910028	-839409.9810975629	-840586.4393553329	-748276.0474551934	-782197.0251201153	-977556.178364319	-990527.2514091155	-948663.6122044382	-798879.3186670567	-770090.9019738663	-975242.4491691131	-981718.2814471633	-939196.587242268	-788219.5763259799	-752299.7824635105	-962732.0320347	-972107.7009030423	-935555.7806428599	-790311.3299897106	-727175.9546334103	-858418.6406349877	-898228.0804326143	-872659.4224307757	-754311.1765413886	-831658.1703559451	-1025828.1550176045	-1041006.326608865	-1001455.543189813	-851750.6907215355	-816776.9259812585	-1020227.7492368013	-1029092.2416411595	-989108.2073754496	-838536.2438059069	-794271.2790065603	-1002557.7960478456	-1014026.033606233	-979714.8306701654	-834823.8860051652	-830720.4813871442	-1019124.2043392565	-957046.1225438653	-904732.3430200126	-760346.3062827982	-881119.2425393756	-1074100.0797232895	-1091485.4018086144	-1054247.4741407027
337	-583266.6283911368	-812075.6429964483	-911005.9403991437	-960896.8744832737	-791699.2940213002	-649848.7598683061	-919192.7432496338	-1020985.3556447714	-1079442.3303174602	-1033937.4726566446	-588843.4969102788	-848795.5630481271	-950832.2431923432	-1013829.2606409995	-977297.6743958225	-546893.9142696781	-782170.2121932558	-873675.7622176113	-926780.6468578597	-886697.0038512836	-689897.6444988849	-870766.9272599607	-949758.4742027512	-986104.678992734	-915545.5507604885	-713196.7762687762	-973661.1241165085	-1068113.4416506432	-1118411.3754112443	-1062340.9589321967	-655069.6224798283	-906281.0999971728	-1000779.9477243082	-1055467.4800579008	-1007515.2267671565	-612413.563985134	-840084.2009181813	-924713.5093294923	-970230.746878762	-918734.788654384	-796528.660606633	-929458.2114845444	-988510.9632967644	-1011312.4210021945	-1039391.807499677	-776544.7242520871	-1028129.4424444545	-1115241.5394908332	-1157380.4205050287
338	-598713.6210572729	-812948.7798142055	-900139.6080988576	-820006.6816213541	-847537.0031114225	-702218.3377292606	-950659.7859416064	-1036850.0519474157	-1068130.1475636899	-964395.6558264983	-658460.8379359876	-903255.5614926311	-988678.4703853485	-1024494.2224729225	-922332.7667448221	-622776.900782304	-852465.47516804	-930187.9514148924	-959826.2894506998	-860627.2017912813	-699505.3181817144	-871344.0969567747	-951383.8472408123	-957944.3616034228	-863852.1602299173	-759810.2870661876	-1001620.331468832	-1082396.62482438	-1108359.9959834765	-999788.3804228079	-717040.2722047503	-955113.7974838129	-1034968.9478557454	-1065403.9504373472	-958088.3682565024	-679536.8753092845	-903089.4184533281	-975629.538771776	-1000374.21834424	-895842.8520464844	-800297.0215405257	-929739.4203747293	-1002628.0301171367	-1095881.9790936948	-880167.3173073966	-817402.1676687448	-1052580.802027318	-1127943.1977013445	-1148589.8318935079
339	-575089.4696976584	-796847.4341308593	-890672.5326240154	-934613.6856618028	-779615.7651884675	-635977.8992129128	-896021.4967387555	-988618.8386271752	-1035869.0767509607	-977486.8569513371	-578896.0619978036	-831486.1246150448	-923720.73201016	-974953.6425300064	-924278.613304242	-544985.9173674452	-776483.2373700477	-859547.8917734481	-902680.7663935754	-849646.8203467167	-682183.3003702485	-857742.1213968714	-932286.3785025375	-961804.2546716926	-885381.0116831701	-700987.1716965296	-953119.7387628276	-1039380.1952773099	-1079646.4261210922	-1011999.7628279566	-646226.3856522603	-890974.7864860919	-976712.86448191	-1020851.9352736808	-960199.864390258	-610744.5939036782	-835343.5225725091	-912472.1557443422	-949116.4096854168	-886101.3816250188	-789277.1310428387	-918636.8086304539	-973900.1767013534	-988994.7611815823	-991146.2581778727	-765996.3767508584	-1010217.9182544702	-1090141.5617860206	-1123423.7754912237
340	-609371.5373256989	-865388.9864791352	-970063.9646776582	-1015752.7134138246	-904565.0813274665	-705522.2713004809	-1004104.5466838514	-1129384.3154697008	-1204330.4375887336	-1163244.285738361	-632984.6180736797	-912140.3997022378	-1039522.9212714045	-1118697.9568003027	-1082026.3602017327	-564345.5652930549	-802907.7792477764	-915132.45765562	-977266.9381181552	-930500.0326260438	-715466.9741108158	-913671.9785274618	-995724.0838930267	-1014544.4506976677	-891165.1236901392	-762186.6779173954	-1048608.1459231465	-1163578.6538578346	-1227875.3327284034	-1174700.3524789503	-694614.7524622078	-962106.6471524427	-1078937.10652762	-1147388.7066016109	-1097642.5600471336	-628453.8868328133	-857343.2561259058	-960150.7994711798	-1012878.5560134581	-953175.6352456124	-821562.4023301599	-961954.970519803	-1021384.1491181825	-1013336.1426130562	-877765.1746745699	-818851.0220343098	-1093111.6826624416	-1197772.9921899834	-1251420.1937169535
341	-578141.0234011707	-764433.3688255356	-836082.1074502186	-848878.5214755972	-763222.152431434	-688028.5006270935	-901001.1328783726	-945411.7392021212	-938492.0926199991	-816867.42841899	-659438.5722084381	-874972.7873441379	-916291.1225483922	-910413.4729414849	-789837.2905537211	-642850.0805859694	-854899.6176902293	-893887.9932675814	-888833.917639875	-772047.9172236051	-677076.9199985918	-826216.9958412511	-880923.8541382055	-874947.8748775823	-768345.0049642286	-746938.3008827314	-956817.8450994579	-999956.768677204	-991893.5679811492	-867489.5472089812	-717521.2891309101	-929686.694914693	-969758.5677114056	-962825.7068671724	-839465.8020027408	-697104.6192140732	-905780.3698875534	-943586.9612031941	-937490.5478312342	-817851.4826689925	-776012.8184644786	-888000.6228350706	-925765.5420241979	-901017.1657990306	-773467.8575116205	-805848.0312180297	-1012634.4948205432	-1054501.8055726266	-1045295.0433666283
342	-649133.3576786686	-833665.6392131875	-859820.4459702488	-918114.5922261792	-832119.1521313888	-860160.6230097709	-1077741.2419725296	-1120383.5023124036	-1115129.4022732568	-988666.2179154281	-841853.3691948617	-1061535.6800896048	-1098658.688365498	-1096768.4120211473	-971953.9264489345	-792932.5285222792	-1006506.9647235733	-1037147.421901356	-1039693.626645996	-921694.2420783071	-736133.0041961548	-880829.7003795053	-891282.5302433136	-929560.6621840358	-826523.3922824156	-899439.3182697897	-1113343.903851843	-1154609.903945982	-1148323.0084488154	-1019677.9582608792	-879778.1945628477	-1095548.5864461702	-1131477.7697601242	-1128493.404636417	-1001444.3336263427	-829592.5536622991	-1039335.083095661	-1069028.3322913602	-1070341.755841617	-949925.2993864734	-823132.659614952	-927993.7570366061	-922744.5542709868	-941006.6651912368	-820927.641451876	-938717.9510298086	-1148946.5032897175	-1188836.3234407434	-1181516.5967046292
343	-637011.579031826	-829826.6311296632	-766785.3737438865	-903907.6867141626	-817213.0144031518	-800582.0085605836	-1029617.4863713976	-1091488.6708984924	-1067253.343856192	-929530.4540552059	-777400.6084838496	-1010254.7075378045	-1071450.482196224	-1045756.7444390199	-907630.0294652003	-740938.7765825605	-969347.003245587	-1025628.5532609654	-1003164.9758707071	-870128.8446688491	-729891.6789860794	-899060.9441323346	-951288.9727647781	-942657.3372467128	-820067.5110252744	-847391.7179492249	-1071957.522866032	-1131059.2852089133	-1107167.6741678808	-968043.8379695797	-822986.8656701801	-1050995.0643915294	-1109348.7446579842	-1084191.68657048	-944773.5334351838	-784002.1571353213	-1007546.9947962507	-1061165.6591753175	-1039141.5656712357	-904732.3290812206	-822771.7712589939	-968295.2570844707	-1135792.5016397052	-981406.9175473887	-822922.015278201	-894201.3648378662	-1114297.4968101315	-1170629.8994687994	-1147081.9890663563
344	-586377.8950615173	-793684.7522630199	-871200.4350464894	-871338.8587962034	-816063.9577235938	-685173.5395485433	-925073.7571571475	-996044.1364481464	-1007359.0378234264	-911218.7690575601	-643187.7163104682	-879190.3957941199	-947779.3149975312	-960214.9112185669	-868069.3314896182	-613475.195320445	-835021.0351425139	-896081.1309372314	-902958.3760616494	-813960.7715329686	-688573.0540488837	-852783.2954480201	-910981.1270770454	-890923.1134980578	-816964.824074714	-744554.6678982608	-978569.3858211621	-1045397.0880202763	-1053049.1789837813	-951566.8204410854	-703408.603464245	-933466.6553630404	-997888.5885541297	-1006779.4879227837	-908869.3309324991	-671441.5317593821	-887612.4549578376	-944923.4380517601	-948720.2653877292	-853801.2674175546	-790768.2130042522	-911881.8386010225	-950761.7566076013	-910507.3008042397	-817865.6904258342	-803935.7337159803	-1032064.9421938318	-1094750.0493517532	-1098739.3006254418
345	-567098.3777860636	-784018.9591828309	-868243.3346867575	-896233.4499485992	-800271.4102954275	-627400.8481957729	-878157.9776173973	-959205.0144222986	-987075.0528169126	-900074.7023292135	-574587.0183028176	-818104.018712179	-898161.0304576593	-928555.5257305291	-844266.7071876688	-548085.8008292007	-772054.1410774328	-844148.4927201087	-867570.5515624796	-780893.9599274693	-675056.1031151059	-845592.452099481	-910923.8080288193	-916584.1248620295	-803167.3649324334	-693430.4449379868	-937140.5262613662	-1012933.6584569666	-1035518.9444192406	-941675.1396560887	-642528.4265749219	-879058.8373467373	-953772.415657249	-978902.0785963	-887338.2083641061	-613794.7828615871	-831639.2496784229	-898917.7212993721	-917663.4659529951	-823735.2731206657	-783013.8247009701	-907165.944991666	-953604.222589594	-936934.744761816	-806063.3233370825	-759459.9791802006	-996123.012405335	-1066662.3024671695	-1083962.821097786
346	-627841.0583634493	-812751.9749585983	-846729.899977213	-896858.877143256	-811206.6326326844	-805765.6131902449	-1022614.98830726	-1066012.2690046404	-1060125.0065679858	-934371.0389779783	-783899.1911755857	-1002871.9373960833	-1041144.6210822121	-1038220.2915828531	-914067.0025718932	-745198.6011480016	-958599.9684408857	-991151.0886916457	-991996.8649911033	-874061.6067735452	-718994.2793604601	-864500.0397617145	-882721.1057582872	-913058.2060082296	-809530.2257230231	-851351.5396184747	-1064635.7787966998	-1106665.364223759	-1099728.9881345807	-971683.7217714195	-828297.2360230851	-1043461.0948120852	-1080520.1530095255	-1076513.9874665511	-950026.1760938967	-787474.5857395638	-997129.8219615611	-1028678.6168476976	-1028333.900095913	-907903.252611113	-810147.5076084955	-916248.1008916142	-918712.2508759697	-929257.4687476909	-807853.8261597946	-896937.4035467046	-1106656.506833844	-1147318.4739926308	-1139332.9551037177
347	-588993.6205868702	-742151.0001930533	-821428.1187350478	-828160.8038818912	-740181.8438110616	-721811.2900466674	-913521.3607585696	-944894.4172533039	-917766.1735212203	-776893.5902592476	-703061.7685398314	-901546.4361823318	-929417.7842074007	-903073.601212191	-761785.1361783835	-689448.6531253267	-891723.6643264837	-921531.7261421581	-900449.8755699625	-764513.2119446059	-684453.8572002397	-804539.6134970019	-868595.209547498	-859471.1522420895	-747405.6366917535	-777261.4215455747	-967959.491408233	-999941.2108752729	-973828.283932868	-832203.8091735058	-756349.9918042768	-953441.649069367	-981943.3514551842	-956725.7271139069	-814933.980487982	-737968.3048543935	-938466.4359822372	-968660.4916003353	-948420.2879305603	-811917.8118221199	-779914.0919711381	-866928.2272615683	-915762.2406285033	-890781.4390307962	-754629.4295724455	-832711.483126112	-1022397.5595821395	-1054988.0045214847	-1029890.386926146
348	-634947.4877624485	-794704.8239654755	-826056.881451742	-808346.8219814423	-711135.8897005027	-997124.0830082512	-1121067.899752449	-1084167.3702320843	-996053.0639264999	-795568.1803411131	-1026893.5396940198	-1180218.580656477	-1136317.0396348727	-1045427.516477657	-838089.2876253955	-991109.4074840331	-1186795.512285287	-1157462.728285804	-1082335.8452803523	-884228.7091741015	-700783.168588508	-844775.8623304854	-870526.2907146006	-838809.8441250239	-707763.978353964	-1020549.0025640477	-1151275.037170004	-1122594.0183643012	-1042414.2438622549	-847802.1101351376	-1042944.573737919	-1201810.2323362315	-1166360.8525349568	-1083672.0127251882	-883363.9372222256	-1002160.2532755097	-1201077.2413319119	-1179023.5413247682	-1110905.5304543693	-919851.4711671422	-766618.8461796404	-894846.9049599732	-914995.6385463916	-869272.8037742313	-704392.068610824	-1043973.8595635847	-1181482.129302998	-1161020.6492810796	-1088775.4410134484
349	-586194.3745354044	-758940.1563455798	-808212.052766553	-805982.6709478118	-715100.3230780491	-788687.3009535861	-956072.1400148766	-959669.1506268225	-910032.6414339991	-747251.5993000488	-785873.7248958475	-969484.0673492298	-967828.7230864895	-917343.0489741197	-751701.0275825482	-770426.3410623339	-974324.2169038621	-979029.8002037744	-937080.3109209288	-777939.4595784867	-673131.2007374652	-819578.4566611034	-858213.4270247854	-839652.5365261107	-720890.2081588629	-836267.6608675861	-1005659.1575444648	-1012850.5132817393	-966762.7412678332	-805667.457927759	-829429.5127504764	-1014271.4638353974	-1016344.6926061205	-969589.9535399933	-806229.8001819949	-808551.6118892464	-1012483.7140746114	-1020340.1353716775	-981518.2934362462	-824639.225640901	-760068.0252713781	-880216.7591756812	-908214.7393342319	-873322.3396073107	-726680.0940664979	-883847.958252575	-1055246.1214515006	-1066031.8670592085	-1023492.849979115
350	-596657.6401369874	-840916.4802232949	-939440.8213997022	-979806.6037708333	-873198.15665529	-682026.8015412869	-966225.387713477	-1078201.9065670774	-1138989.624274482	-1084094.5116713718	-615421.202241037	-883858.414326029	-997007.5151418318	-1061511.5211006915	-1010518.7696415735	-559455.3471036082	-793628.3691476712	-893783.6197152947	-944275.1155094295	-885505.1411201656	-703313.1709709294	-893196.6672640592	-970219.9105439531	-985082.3162177682	-864699.2888704464	-741507.8432453931	-1015083.6147150755	-1118271.3003413612	-1170023.0365861773	-1104616.6721846093	-678949.4887468761	-937129.5381046218	-1041293.1019461617	-1096715.3789047836	-1034392.3101307609	-624045.0765428217	-849612.6275457338	-941734.5971124524	-984242.0670680881	-914245.6978089948	-809968.6946895218	-945476.8542583178	-1000998.944257048	-990357.9803954022	-856200.4282474578	-800988.8224494994	-1063941.7792166742	-1158340.6940691392	-1201056.4205294854
351	-594540.2388191284	-765062.5768916912	-811266.8426766726	-806387.3811779262	-714421.666460229	-824368.8191094241	-984317.1509898037	-980981.5381978876	-924758.157903228	-755522.7352610359	-827133.011346462	-1005558.9255796846	-996671.6118832999	-939269.3529961695	-766489.5127951135	-808204.2551310069	-1010696.3884036046	-1009575.0700942322	-961946.066069281	-796134.7212392703	-677864.8383574457	-823891.9069025118	-860321.2204044744	-839508.2791454663	-718643.177656452	-867814.0989516284	-1030586.5988598578	-1031637.0961031042	-979713.2408712638	-812880.3324641411	-865980.3626056149	-1046375.5287092788	-1042025.4015549184	-989119.2373158499	-819434.1064666414	-841694.7557463576	-1044768.3391804628	-1047504.55795934	-1003667.6137303251	-840938.2561378874	-761189.4359594039	-882721.2394659587	-909375.5362721166	-872629.1146163739	-722864.6898124357	-911259.3162601568	-1076855.9945347093	-1082292.6437035233	-1034668.334144097
352	-586244.949730366	-820873.4810284906	-914360.4463189533	-950366.7156327361	-847508.6241090316	-662783.9958988247	-935202.3308673112	-1036283.4790182597	-1085475.4539253432	-1019270.7931151644	-601036.7527812412	-860695.4491520986	-962187.3687329022	-1014675.7915395844	-951954.0045522754	-555450.2550950974	-786028.525992241	-876298.9069860526	-917254.7904528566	-848654.2945090872	-693359.1979695569	-876427.373474715	-949331.9753012094	-960952.808128791	-843023.7522320878	-724571.8636465924	-987627.0009549215	-1081164.547132025	-1122641.9668716888	-1047218.0905672002	-666119.6271564696	-916673.2688814994	-1010462.6367037504	-1055213.8892082316	-982590.3126200852	-620434.2579299442	-843281.2375038683	-926651.7149103386	-960788.7632309668	-882362.0526874536	-800473.4402812958	-931981.2658821979	-984303.4476721758	-971538.84997975	-838538.8863213374	-786359.6688943602	-1040051.6085425317	-1126045.6152070488	-1159808.4561857097
353	-658275.591628778	-773118.8902280972	-811201.2239649323	-803027.4344403783	-709472.9394814622	-927181.711115934	-1068592.1154936189	-1051882.8648349661	-979078.6654034186	-789368.4877688076	-953579.8772500214	-1123258.3135617662	-1099011.2403858784	-1022905.6615886278	-827679.2455631307	-929632.5375483567	-1134981.6402759273	-1120179.078191727	-1056697.0872606412	-870364.3008547208	-725179.5805311417	-825012.3258684811	-855381.4436101912	-833489.7593977465	-708163.4827864591	-957460.0971679859	-1103822.2820443495	-1093415.3502634654	-1027156.6561266135	-842332.8847089397	-976907.1453076254	-1150455.4183770982	-1132721.6112540178	-1063405.7143408684	-874187.8280552585	-947913.3409754236	-1155087.0986528841	-1145768.9943089401	-1087962.9923938601	-907674.4423558156	-792083.5731899522	-876905.7596356104	-899561.600760419	-863952.0217607068	-706854.0270355367	-987738.420720038	-1139052.3557354368	-1134947.8357416529	-1075234.654402453
354	-596742.5213513917	-841079.8649054012	-939645.2693004305	-980046.589150164	-873407.570229962	-682183.6632790024	-966478.2786222433	-1078543.6133592045	-1139425.856178984	-1084622.9357134185	-615538.4600765246	-884047.2320605806	-997291.3588169538	-1061893.3123042528	-1010996.1725209405	-559487.995445219	-793690.3208519015	-893926.1499924863	-944495.3773164011	-885805.5384709005	-703394.3128548719	-893333.3656547685	-970390.1828982213	-985279.0129281848	-864875.9815215174	-741645.9004101924	-1015307.4330202763	-1118573.783768027	-1170409.2732435716	-1105084.5686765348	-679054.0740355869	-937296.2916434319	-1041544.4229043608	-1097053.6869411762	-1034814.5849017916	-624074.5108827363	-849664.2391902402	-941857.5483678952	-984433.2515587189	-914505.6039823147	-810046.0972333192	-945586.866357567	-1001135.0410744761	-990511.3884562715	-856344.3999846744	-801108.0750413825	-1064136.524918309	-1158603.9541302808	-1201392.6619011655
355	-601738.2377713476	-770342.9379397252	-813901.4858753611	-806736.4287676403	-713836.3502535525	-855142.8074667703	-1008677.4272285909	-999362.6834203169	-937458.3706688613	-762656.2838015929	-862717.6183499582	-1036672.1551885903	-1021547.535607976	-958179.9784282824	-779244.0337705561	-840786.3073474134	-1042066.0396997151	-1035919.2344841978	-983391.859269277	-811827.4607707636	-681947.4255491944	-827612.0980370186	-862139.1141567229	-839383.862495563	-716705.1970408913	-895021.7338418836	-1052085.5940950932	-1047839.8282428634	-990882.5673073527	-819101.1697064404	-897504.1173679695	-1074064.0960605156	-1064174.0622354168	-1005962.521531524	-830822.331768486	-870279.490250366	-1072612.6330468154	-1070932.8667211963	-1022770.5824402366	-854995.5664955808	-762156.6111593599	-884881.2609918811	-910376.680654362	-872031.2337272555	-719574.0449026459	-934900.5976792981	-1095493.7099974293	-1096316.9615295762	-1044306.7754816776
356	-626142.8045956248	-788245.8196862316	-822834.1526383505	-807919.862564252	-711851.8558719906	-959480.9520402456	-1091270.1023975748	-1061683.3214011285	-980518.0033777377	-786842.3337312856	-983365.9992815384	-1142160.485507881	-1105888.4957670914	-1022295.8007714606	-822487.7965889518	-951254.629983417	-1148423.758892514	-1125238.21390506	-1056103.08036324	-865033.1521156097	-695789.2964077962	-840225.2775809197	-868302.6201325756	-838962.0321414918	-710134.540702851	-987268.2801691857	-1124977.1948519056	-1102774.631910583	-1028751.7827936448	-840192.7035049885	-1004384.3190402423	-1167941.2272850794	-1139268.331244557	-1063069.0948875784	-869433.7162982238	-967195.0452522475	-1167017.7496419912	-1150365.7383503641	-1087538.538023138	-902656.3917153676	-765435.7852679967	-892204.7393670756	-913771.0261022346	-870004.1392238655	-708417.2269968623	-1015055.545746787	-1158684.2405158556	-1143865.926710418	-1076985.5779191714
357	-574434.419181689	-776987.7458207302	-852402.165519607	-855776.7710985203	-793882.6495529147	-658024.643741304	-891903.0638002638	-957312.062940044	-964044.9691384773	-861829.3051602696	-617066.2617967358	-848449.4664720533	-911245.6370613178	-919117.7652283283	-820299.5117609858	-595588.9907104711	-815093.1016282804	-871541.4513916937	-875322.7532234931	-779754.8834695288	-678282.2453881555	-839018.9607931993	-895876.7096195389	-879373.435743157	-798141.0151100794	-720596.7958842186	-949233.4525126063	-1011144.6549085501	-1014797.5836588196	-907829.0751507266	-680180.4917543357	-906212.5501371291	-965498.9381192564	-970403.401333947	-866506.3404725131	-655615.4298066318	-870204.4862497466	-923477.9845406453	-924654.7950314842	-823872.1528287969	-782130.0715699607	-901050.1757410069	-939351.1912194708	-902970.0341146082	-802399.3806672442	-783168.885502472	-1006563.7711785776	-1064977.254398766	-1065550.183135742
358	-584631.5827535299	-758095.6767356263	-818403.3811260749	-825667.1047145651	-738832.2589266083	-717703.4028756008	-909885.2208250498	-942495.4248798557	-918657.3618067601	-779622.0068004342	-700357.735052546	-901544.1246283476	-929535.8577202302	-905938.3156677138	-766430.3287920322	-687844.6744697018	-895158.3066918171	-923459.204348635	-903796.2941993156	-769285.0398030318	-679091.0478698974	-819386.8761673747	-865496.2182279559	-855747.7862436174	-744987.7694103754	-773134.5895132348	-964302.4035395591	-997434.5652114706	-974349.4202748997	-834436.9261613885	-753551.8144482288	-953245.0150463918	-981833.0419918599	-959116.7629631157	-819002.8952306542	-736390.8861943342	-941712.5308203325	-970395.4698453102	-951352.8537450226	-816191.5838226024	-773550.5166961605	-880678.0737576258	-912588.9919054199	-885828.4043384705	-751143.2806522624	-828565.7136508687	-1018719.5237296128	-1052373.7055430855	-1030041.4787430392
359	-621111.4570755424	-844806.9772145853	-927930.1463018231	-962065.1109220489	-880438.3330587756	-780248.2880662514	-1035462.1180584703	-1117594.9809729466	-1140157.9458919396	-1061471.0454337723	-736814.495219076	-981841.4583318187	-1063301.8195108515	-1089989.3161018104	-1014310.418923384	-679641.1273256494	-900508.546456621	-973056.4936486278	-993833.0530405121	-918271.878268654	-717201.8339056247	-891260.3859594376	-955220.2616877253	-965494.5607674865	-868363.742332481	-828068.6241155082	-1075598.466096955	-1152058.1799481143	-1169318.9366527165	-1083459.9874945562	-786579.888678816	-1024095.936804781	-1099797.7794430754	-1121166.719261599	-1037663.7860042384	-730227.0688086456	-944686.5668711095	-1012147.9427031239	-1028288.2742500355	-944770.0201669522	-813292.2064619884	-937713.7947042899	-982510.3059699577	-968923.9652640306	-856289.1430025164	-875888.8976647648	-1115734.7515792064	-1186521.3960743884	-1198479.9274697267
360	-618044.185442262	-756162.6061826625	-804066.4567226662	-803169.5967772256	-712668.4865516998	-810234.8741102399	-975080.9417018796	-978951.2797335223	-926957.3755673447	-759010.6160841385	-815898.0546520421	-1000559.7291802892	-998237.9338433727	-944403.7296446044	-773181.5436545768	-801734.4864974341	-1009449.6195405427	-1012736.2264633381	-967702.8204905693	-803654.860710225	-698738.173076945	-814544.2172185734	-852046.6325806292	-835780.561687385	-716827.7254380921	-854472.3243360168	-1021664.736493388	-1029360.8636564274	-981424.923462783	-815879.555437227	-855291.0697148663	-1041477.9046624193	-1043133.9499757548	-993552.7722221913	-825489.5115859386	-835807.7552518198	-1043662.2422264894	-1050249.9170429115	-1008724.7763707212	-847838.4877030555	-779432.1632491957	-872925.8269890572	-900026.7459419488	-868391.4640337694	-720986.964962233	-898709.7120617937	-1068248.4482762492	-1079770.4476128982	-1035892.4764602089
361	-591106.2848263029	-781132.603072172	-776807.6337124087	-859022.3700145409	-773467.3958999872	-696094.440556198	-918248.4350588	-973346.5233930317	-956067.32460151	-825085.6151308933	-666512.2868394653	-891769.9004020756	-944979.2384818298	-927430.2829964664	-796846.2286577662	-649117.3542904845	-870479.5355506084	-919908.0584263118	-904522.1321690263	-778360.1514152085	-691370.1794100394	-851553.3474538587	-903837.2788275044	-897027.7627344213	-781992.7404821601	-754741.448046085	-973047.7326980061	-1026019.6161811507	-1008429.6686818982	-875434.2640662198	-724277.6540590083	-945355.0863068668	-996411.1778499006	-978699.6820301062	-846161.8337088472	-702855.7400213212	-920022.2292523771	-967421.7109966131	-951829.9010514488	-823639.5162778074	-791634.0697450539	-921974.0918075932	-1030866.8572134444	-935033.0886776276	-790518.089285103	-813388.393035972	-1027846.9678092601	-1078692.7089413176	-1060792.00423689
362	-612756.8970286672	-804098.483942552	-772080.7701180208	-880191.9235979028	-794099.4262171055	-745374.591222544	-970774.1444142179	-1029066.6721180015	-1008506.7093580964	-874345.6132035475	-718811.2665376446	-947651.6599150981	-1004627.6929749413	-983237.3609012738	-849095.91251443	-692423.6883489225	-917109.0417881748	-969769.7023852726	-951045.6975330091	-821641.6165346118	-709538.3245708222	-873959.6639834292	-926217.2295839813	-918548.3354662184	-799950.1919262636	-798438.696889246	-1019697.1997585506	-1075560.1578407479	-1054998.1158165801	-919112.3191905587	-770832.5209514084	-995178.7556278252	-1049676.6563607918	-1028453.5616268279	-892670.7104373625	-741127.3520205998	-961302.1031686468	-1011634.7784316861	-993009.2687941449	-861885.8465277588	-806319.7462453076	-943820.8439857033	-1080353.6207092945	-956904.6789282615	-805800.9634644883	-851502.7400559481	-1068620.1925642802	-1122053.6435248912	-1101489.5105011216
363	-628849.5022322346	-814815.5195914481	-890277.2942322474	-901389.600055643	-813984.8375617007	-828245.7565800659	-1040450.8297388805	-1082197.2232381366	-1077300.6459435604	-956847.4867741907	-809963.9786365691	-1025127.1974412872	-1064126.2346311565	-1060087.2207039176	-940288.0066553316	-767019.1909130455	-978384.890774512	-1015109.4452304447	-1011872.482437928	-896089.5732061347	-715682.0532757823	-864913.9982574772	-922342.4822071283	-914722.4828132503	-807057.1943882891	-870517.735300408	-1079612.1295679882	-1120154.3449260683	-1114087.917352253	-990847.0397341915	-850982.7527829083	-1062762.5675677382	-1100577.7706441218	-1095452.0810814267	-972857.4688274225	-806592.3569223583	-1014579.0248707305	-1050194.3133754905	-1045871.4777998428	-927219.8188841718	-802514.608348306	-915012.4768762917	-954407.6156560241	-928055.303112826	-800129.5512463539	-912789.6355202593	-1118773.366897096	-1158111.4826144907	-1150875.1888134065
364	-604404.2306607228	-748148.1394690619	-830503.0614713843	-835117.3428077727	-746058.1796856348	-765487.1533487268	-951020.6647103564	-978072.0524420998	-945743.992824677	-799734.7562841012	-752020.8781270836	-945612.3833130817	-969130.7532531541	-937469.1636012408	-790535.4245092777	-732825.0531227437	-932180.0292983027	-958850.530978963	-933696.4087839546	-792609.4598270556	-695936.8004380182	-807860.4659542389	-875212.5957025783	-864801.2265342921	-750938.084232233	-815909.4441438885	-1001012.90215472	-1029219.0831437955	-998508.0783725689	-852316.0410668197	-799801.4358210095	-992552.9488350282	-1017245.6213759325	-987317.5199038628	-840520.0447924624	-776152.5709332756	-974179.2305141323	-1001695.0288009251	-977902.6576426525	-836890.3837958914	-787469.3678538267	-867572.7930297876	-919922.0709822169	-894485.0489508767	-755817.9887788312	-866331.6629309587	-1051005.0771301559	-1080366.1138765635	-1051272.1544123695
365	-618037.7125517472	-837945.2491162762	-921030.9691674996	-912590.9081353515	-874862.2653054182	-757139.949910718	-1013002.7744943025	-1098715.284330292	-1122176.158326916	-1042140.5734519933	-712430.5808505015	-960678.5841246578	-1044622.9463947238	-1069155.4034598414	-994697.7761205477	-660888.0238171371	-887846.0874443852	-961131.0195540467	-976215.0045413505	-904633.8874730917	-715851.9741307497	-889269.8532500141	-951019.9821651648	-921539.0492164613	-866863.0582477166	-808062.2985956117	-1056333.204645719	-1136193.5857755968	-1154446.6732210973	-1067507.024721619	-764981.7823928713	-1005711.9553070188	-1083747.2139374106	-1103205.3754951311	-1021165.3291660375	-713393.4312271148	-933757.5736585519	-1001771.1389211373	-1012513.118235706	-933137.4937438114	-813666.2356583067	-940594.4573323067	-981008.9326628301	-930487.1199264055	-858863.8511900151	-858984.5847290598	-1099663.556554804	-1173671.902911787	-1186717.1567335075
366	-580234.2455829493	-769600.090469425	-779181.2685092369	-848391.8984522885	-763106.8462221691	-671347.9933446783	-891872.2029199818	-945366.1763284245	-929734.4410949333	-800349.2877158683	-640249.9089283287	-863708.3991043487	-915026.2592314931	-899406.2837041183	-770608.6050731346	-627370.7099476651	-847064.1320056841	-894869.6094072697	-881159.9277357165	-756625.9952218512	-682246.890640154	-840301.8248487893	-892598.9960198632	-886221.0239183248	-772975.2533558797	-732798.5025160018	-949622.3056558836	-1001142.4114154897	-985044.9264853237	-853500.9568254517	-700899.7312967132	-920335.7065756009	-969663.464331519	-953715.3478030316	-822807.0052988912	-683637.3242244172	-899293.1891225388	-945219.7427690976	-931151.3309523459	-804433.7959265683	-784259.5322616049	-911003.5592055499	-1006016.6576105581	-924050.0834260036	-782843.6639027405	-794248.9491873252	-1007372.3458691818	-1056918.6464799515	-1040355.4049816027
367	-613374.1626755844	-833903.6034537887	-925381.4834190767	-823770.6810568745	-876713.0231131881	-733041.3139899208	-989402.7850080649	-1084575.8806593537	-1124946.6135684177	-1025513.6499296979	-687860.9611375758	-939241.0231518049	-1034243.682824729	-1079908.773172291	-982090.5672472011	-642644.9962447657	-876212.8302588317	-962303.9017058108	-1000194.2389047421	-905194.528392855	-712206.2798783297	-889228.320881448	-975568.2761985323	-984657.986513963	-893203.5606389984	-787059.1449195035	-1035980.5920862372	-1124810.4045982028	-1158909.6160909208	-1054169.6296848317	-743195.3310174819	-987088.4727631081	-1075552.37019744	-1114846.2250529705	-1011332.1998151399	-697085.8758334791	-923888.0861970478	-1003900.7264632207	-1036012.4539205192	-935113.222776646	-811038.4047341011	-944553.0460124825	-1025755.0141310141	-1145545.2294811213	-909694.09811446	-841076.9056960599	-1082558.321358357	-1165044.928537052	-1192872.6032570223
368	-601959.6805355524	-815468.1237923874	-895725.1718984873	-891641.5842735464	-845002.2993694056	-720592.7319663719	-968349.1514487625	-1046575.0594759315	-1063867.7571482903	-975653.6152337007	-677266.4807001691	-919295.8534337936	-995442.1510016636	-1013831.3725283381	-930391.1455606807	-636810.0273225771	-861019.5625464212	-928096.268417095	-939012.5658836232	-858586.7091675528	-701998.7246425363	-870740.6231089297	-930686.7634346012	-905991.1391617632	-841522.8803761071	-775810.7633509825	-1016841.8472129534	-1090083.7495985911	-1102953.2570252337	-1008628.2798595605	-733712.6336538161	-969023.1068675945	-1040145.0128759276	-1054236.7259425358	-964137.2475781841	-692088.6974588124	-910323.367315128	-972901.763571549	-980116.7365821893	-892847.6093403001	-802037.7687079507	-926013.1223839028	-965648.2924707152	-920340.6251898804	-838043.4613828086	-831028.7321940237	-1065334.4677569452	-1133592.4523998806	-1142038.7315449174
369	-641847.3178187346	-834956.1397025568	-765729.6124836432	-908635.9794020444	-821821.2494186157	-811588.8999027105	-1041349.2844224545	-1103933.9579824405	-1078965.8610108504	-940532.8442461386	-789081.7656852434	-1022736.0909477533	-1084773.169900177	-1058221.447454616	-919300.1762706467	-750611.3954151284	-979761.8640273424	-1036765.3231323063	-1013556.1743935518	-879795.9089382502	-733949.5967677572	-904065.4720829097	-956287.6118291451	-947464.0312700935	-824078.3696398311	-857151.6489450329	-1082376.8419663326	-1142124.3357760108	-1117568.8971887566	-977799.4819821974	-833385.0554971802	-1062123.3524967108	-1121245.77269723	-1095304.38690044	-955161.4512007182	-792550.2534594622	-1016766.9967781719	-1071040.8000297938	-1048339.1192532071	-913274.7786395942	-826051.8676738433	-973174.8044103486	-1146845.5406687504	-986292.0125422921	-826335.4978510692	-902714.3354873551	-1123404.3369572968	-1180314.713516667	-1156171.9172278754
370	-604085.8324875335	-772483.7542078446	-829683.3046580786	-834246.2670215939	-746371.7402264904	-776029.3326833774	-959920.6156068869	-987080.5382549474	-957380.9134893629	-812009.188818326	-766473.5517108694	-961991.6447048752	-984058.6056587027	-954228.1585827514	-807664.161038017	-746727.3741374878	-951982.4188886805	-975396.8995148423	-950696.0726093034	-809670.6125916252	-692770.7158851476	-829679.6347160508	-873376.2422589376	-861620.6404094221	-748899.1636169085	-824556.1496947876	-1008230.9536949302	-1036628.4951077307	-1008405.839046647	-862889.2393330951	-812075.9928273652	-1006820.8002876744	-1030217.0660981471	-1002005.6631068264	-855673.448533575	-788161.42754894	-991956.6890701846	-1016381.7422837197	-992929.1378981423	-852099.7271226423	-781455.6044262422	-886875.5126711648	-917069.1160781647	-888994.9500020563	-751426.5880584004	-873082.9042061978	-1056541.2292490678	-1086176.451960514	-1059430.764603931
371	-587878.7438863848	-795782.94233347	-873562.675403722	-873294.4319700899	-818851.3196806111	-688585.1417302467	-929242.074374483	-1000911.3114308913	-1012801.998460692	-917425.1799547662	-646470.2074968889	-883053.3824248613	-952370.2337677747	-965379.2874759872	-874072.2136091306	-615722.823183583	-837525.2320695901	-899164.8520900282	-906431.1416517051	-818259.1740600143	-689866.2243320402	-854512.9582111577	-912879.1881958938	-892374.476607127	-819330.2737853645	-747565.2775750743	-982255.8169301242	-1049701.3395214167	-1057855.9758049427	-957063.0214031735	-706327.5095276455	-936891.4784390603	-1001958.7578484095	-1011350.6033467568	-914192.7765600092	-673430.2816641007	-889799.9864303962	-947618.330562513	-951744.3961573199	-857562.2392578986	-791853.7047447758	-913242.9740559257	-952195.6384880657	-911454.4537074369	-819809.2278901179	-806545.350886982	-1035269.4869123112	-1098491.3776524768	-1102909.933068124
372	-683630.9952113435	-682167.6270642391	-873120.1565205851	-865515.0994676069	-767720.7471909584	-926871.2285471812	-1109956.204951117	-1100266.6307544264	-1036111.1785265052	-868096.5667328362	-931821.6038393148	-1129785.166330467	-1111515.3933642514	-1045453.0951999184	-874511.542621214	-897915.7188911445	-1106864.7160357826	-1095039.0880812092	-1038390.0132223007	-874616.7591228482	-783241.1257550956	-902518.1098977446	-933903.7921913668	-894222.7899520434	-767369.8655620948	-960324.2273890005	-1143488.402887053	-1138381.3206261937	-1078844.6166326199	-912824.4254922231	-960943.7879975983	-1158318.3591350978	-1144914.7991646826	-1083784.6928641528	-915382.8366290133	-923111.8870354051	-1130736.8092654021	-1123244.770639197	-1071015.8765395584	-909740.4032341879	-882851.2475370404	-1122868.592696664	-994687.3741815995	-922930.4179595376	-767018.9850284574	-993777.146091918	-1177020.5559618908	-1176496.0104979612	-1121578.0546810909
373	-595836.7620622454	-835484.8280431668	-942262.9654005506	-1001300.0523074213	-810274.3979591195	-671171.3951634576	-954812.1652134327	-1070739.9783236587	-1146424.2298191595	-1120714.7765871696	-604134.9436366572	-875404.0664454259	-992508.7389484547	-1073589.8369634203	-1058799.9064081928	-549826.9350173685	-790912.3726907606	-895393.4794135455	-963827.5882527239	-943651.4762602574	-701756.3279996993	-890788.9858840462	-976617.0184353895	-1023459.9014398381	-961915.2376581735	-731965.6869989693	-1005237.857473959	-1112282.9094641712	-1178001.8288433873	-1139726.7096451526	-668663.6681838036	-929810.3494661397	-1037776.4724061545	-1108679.3646924654	-1080249.5898961136	-614979.1467019902	-847371.6907090249	-943531.225439535	-1002688.2361908976	-968899.6813609395	-807675.893937153	-946093.1436760062	-1010971.0313263644	-1045619.6880722548	-1113556.0773572277	-792759.908898742	-1055663.4871855658	-1153825.8554761612	-1209579.4278676154
374	-595703.842117623	-766284.5571962597	-824823.276041641	-830549.8789921072	-743123.3055392727	-750899.2254497715	-938362.5394564108	-967870.751392893	-940696.6187090311	-798054.9602310362	-737987.1209255076	-935947.4364679042	-960567.1241361571	-933422.1648378033	-789898.2955060122	-721357.37897869	-927499.379566927	-953019.2048377984	-930488.9972217422	-792270.2251788105	-686876.7417080307	-825244.9325705334	-869981.0825151566	-859090.2828919269	-747213.9139146401	-802400.8351418861	-989304.0513779074	-1019741.5348064459	-993732.4089179345	-850630.374649659	-786860.4689038994	-983737.323818885	-1009370.493772741	-983526.7007774652	-839873.7014938769	-765855.7521817277	-970308.6658180512	-996568.2569014949	-975015.7247286284	-836628.4694047862	-778049.6458242496	-884205.3056983101	-915138.8253609486	-887630.6231520897	-751304.5232148602	-853902.3823340008	-1040245.50076957	-1071612.3182199989	-1046768.1991268379
375	-611477.0135035856	-777950.16316857	-833968.8442091898	-837505.7163678468	-749236.1874201114	-798188.8870755124	-978930.3777461993	-1004019.5951747587	-972093.0089946605	-824313.9308755671	-791592.6889496417	-984957.2470265185	-1004773.2312554668	-972574.7396692436	-823329.9781362168	-769098.4600394922	-973571.3932807061	-995129.3955904427	-968514.5316391092	-825014.153617302	-697967.9814658132	-833590.1243328677	-876370.0705905451	-863851.89213148	-750385.2051245947	-844092.5525181445	-1024920.5649834892	-1051519.299664813	-1021344.768038624	-873699.0212497895	-834310.8670646305	-1027175.6498557519	-1048599.4290956538	-1018300.2840187537	-869605.5559716191	-807830.4174962669	-1011045.7659403519	-1033853.1363746306	-1008725.0614805054	-865742.1749533105	-784458.9551161781	-889230.0826737195	-918771.233054553	-890198.0039627674	-751534.223991453	-889996.1554607765	-1070910.6896832832	-1099019.0041548673	-1070596.5270825876
376	-591071.6666389055	-830164.2482878233	-925986.2476966438	-964013.3333955484	-859416.7954145621	-671703.8400250986	-949582.8134502517	-1055714.4209869755	-1110281.5069994268	-1049319.294147202	-607704.5458987124	-871432.4509538449	-978327.9609205781	-1036386.1083711139	-979101.219235755	-557306.7825210394	-789551.3707161403	-884403.8016170812	-929779.8396699023	-865736.2010563693	-697973.2802015917	-884200.6415463196	-959014.4057090622	-972137.8429410954	-853071.2687824218	-732422.3975528181	-1000354.2882084732	-1098365.077076007	-1144605.07164144	-1073824.7305036723	-672066.8038662715	-926155.6040599365	-1024753.8450344098	-1074451.56306825	-1006602.7020715091	-622108.0231694602	-846216.1012303648	-933643.2607751958	-971660.3491296277	-897141.4538800748	-804874.8872861856	-938237.0347624755	-992042.5076572323	-980262.3029428263	-846725.7486707141	-793140.8925805374	-1051125.7004666948	-1141015.7331226978	-1178928.610455766
377	-592034.0338384418	-803297.7826472269	-881473.8090459937	-908950.281874877	-826480.3841970742	-708752.9289523065	-950042.5320698393	-1020313.88370626	-1032417.2113016183	-939011.1946618776	-667304.787514931	-902562.1104903409	-971250.6845785204	-986499.6234825735	-895559.6377976808	-631356.8130655235	-849469.1917828491	-911433.7414788931	-923033.3578447856	-833375.5057435492	-692582.8575550711	-858269.629012992	-918342.4156110787	-923650.6694684639	-823655.3782097277	-765105.9183129835	-1000254.1160284164	-1066306.8139178231	-1074508.278512621	-975403.7431890249	-724797.8643986618	-953935.686438553	-1018358.686043418	-1029725.9713172734	-932653.3271377109	-687423.5217523794	-900145.6272819143	-958310.3114472283	-966489.8991724977	-870588.8399176525	-793131.6784292458	-913241.4753787571	-955210.953953854	-938351.005969269	-820830.3665000716	-821458.8451736607	-1050465.6374495928	-1112299.7555366047	-1116599.3457610246
378	-609070.9470951516	-864810.3915614381	-969339.9523971297	-1014902.8520987231	-903823.4840832211	-704966.7761154165	-1003208.9829586742	-1128174.2276529088	-1202785.6075616577	-1161372.9752753754	-632569.3723676645	-911471.7386002652	-1038517.7443739818	-1117345.9178750245	-1080335.7312141517	-564229.9475724477	-802688.389395874	-914627.7145368777	-976486.9239795371	-929436.2341218989	-715179.6259882363	-913187.8878948383	-995121.097630583	-1013847.8877426368	-890539.4012014327	-761697.7754519086	-1047815.5371411776	-1162507.4679235097	-1226507.551097251	-1173043.3885044435	-694244.3841037191	-961516.1220871815	-1078047.1024755256	-1146190.6548139567	-1096147.1564802858	-628349.6508710277	-857160.4835745238	-959715.391631188	-1012201.5135074202	-952255.2283321717	-821288.2963498401	-961565.3841724773	-1020902.1888397557	-1012792.8779495123	-877255.3269068865	-818428.7122884007	-1092422.0288236807	-1196840.7081383492	-1250229.4606184436
379	-560023.361812783	-773042.5534972028	-852352.1252565533	-875280.959145685	-797448.537831318	-618970.2356160991	-862298.755767533	-934556.6694696699	-951579.3562477963	-855163.0005229939	-569893.5263647924	-806208.239877141	-877247.8810253479	-897166.4964506123	-803779.206624394	-549775.6155846238	-768057.0835685474	-832550.9956175683	-848198.978101788	-755440.7967450661	-668588.5277782031	-835319.6067000834	-895737.4050429319	-898093.5465751686	-802416.0503896276	-685977.7601574578	-922975.9010588779	-990838.8517888926	-1003661.5469966596	-901427.3947012301	-638451.2990100422	-868482.0782999527	-935071.9654361182	-950808.4406317361	-851142.4790335833	-615519.1897925783	-828298.0277942542	-888818.4975167684	-900766.8082967239	-801647.8043853272	-777153.6952799498	-897596.6568502631	-939122.6192965623	-920906.0623665027	-807383.5690533384	-752985.2222187689	-983652.9899556242	-1047121.0280226662	-1055743.7438110195
380	-595583.4185661882	-808474.6721813104	-894750.1632158451	-819203.0223353431	-841307.570879847	-695637.2604685641	-942387.6882696864	-1026660.0117829654	-1055999.1466734845	-951346.2267963333	-652183.5569678096	-895572.2313223674	-978949.7478594083	-1012662.5474122382	-909573.7554569546	-618534.8227248312	-847395.1283829646	-923330.8086011085	-951207.2452686488	-851111.5399295815	-696793.5096430545	-867525.5994048011	-946220.1799125628	-952240.6804286133	-857585.2821657008	-753992.3272013811	-994284.0013263915	-1073340.7711894428	-1097567.042291638	-988177.3276840968	-711455.8516300139	-948286.8185892636	-1026303.897612851	-1054847.4283663337	-946720.1679185578	-675789.951997238	-898648.6519879665	-969593.2991537832	-992765.0251313921	-887458.1541624828	-798003.6066513903	-926576.5325987843	-997690.14004075	-1085278.276029688	-873862.9934125317	-812347.3255027285	-1046180.2400201577	-1120021.53059592	-1139134.9260078294
381	-606395.0678089362	-797350.1753676061	-773469.7146269052	-873971.4489389652	-788036.8977256718	-730894.0814091695	-955339.9576373701	-1012693.829310002	-993097.888254519	-859871.0250407113	-703443.7021428762	-931231.3292936343	-987100.5543813903	-966838.9747695491	-833742.8332400839	-679698.5284856687	-903407.3989657433	-955118.3262247733	-937375.1844420987	-808923.7641757156	-704199.7856107295	-867375.7781389081	-919641.0910744594	-912224.7171245838	-794673.5633376032	-785598.6703849647	-1005989.6916356053	-1061003.134577595	-1041314.414638534	-906277.9325804336	-757152.8102001157	-980538.5379583373	-1034025.095359827	-1013833.851012879	-879004.5134641415	-729881.597987066	-949172.3996012504	-998643.1834747702	-980909.0980226727	-850647.5212990132	-802004.4980205657	-937401.3808747367	-1065812.3996548878	-950477.9173827718	-801310.2343060183	-840303.19686076	-1056639.3630983671	-1109312.4398097142	-1089530.9302031614
382	-608958.9677630702	-864594.8467238316	-969070.235009959	-1014586.2519808364	-903547.2157429866	-704759.836656058	-1002875.3572530115	-1127723.4318128796	-1202210.1097010113	-1160675.8531653837	-632414.6802583282	-911222.6412711493	-1038143.284307891	-1116842.2407743915	-1079705.9186467838	-564186.8763285594	-802606.6597633549	-914439.6818213549	-976196.3441356831	-929039.9356602144	-715072.5797586143	-913007.5488811275	-994896.4662485193	-1013588.396094106	-890306.2998586977	-761515.6438788417	-1047520.2653958347	-1162108.4174113148	-1225998.0093426479	-1172426.117215186	-694106.4102203627	-961296.1328937041	-1077715.5479232643	-1145744.3427740207	-1095590.0715334371	-628310.8196909247	-857092.3950402115	-959553.1884916631	-1011949.293841203	-951912.3477561048	-821186.1832354523	-961420.2509827454	-1020722.6434501077	-1012590.4947447877	-877065.3925487925	-818271.3886016253	-1092165.1110386578	-1196493.4029540722	-1249785.875020816
383	-654261.8370690336	-767550.5517140116	-859863.0232741885	-857623.6795503508	-765069.7593540226	-906790.7092509026	-1072341.3345640453	-1085410.9227966317	-1036260.0136901549	-873632.2762470684	-910417.2040482895	-1088177.968810705	-1097613.244893643	-1048748.3669272275	-883550.5973582276	-873159.7620094512	-1063067.6133595132	-1079587.236032511	-1041258.1833977002	-883508.6300584981	-733087.3130792745	-818604.3465637367	-896621.6789764189	-882045.4981701431	-762366.533741189	-940946.5380637215	-1107949.8719147108	-1123941.1366537688	-1078354.0722375612	-917384.7007061223	-940378.9329659629	-1119088.873142294	-1131458.2755533932	-1086290.4714571638	-923298.0735348118	-899689.2836284647	-1089720.0458990592	-1108570.9373947214	-1073286.317215211	-917683.5943504852	-811912.785048868	-869658.1424236235	-933380.2782502533	-906467.2563262089	-759663.3081283554	-975102.2881076189	-1143558.3468185428	-1162471.3505640724	-1120448.1145160461
384	-635554.8157204697	-820328.5607052951	-851472.3326269841	-904559.3807935326	-818782.8036581245	-825471.7943296698	-1042586.0838888206	-1085709.8364081874	-1080051.955544169	-954041.0534643952	-804894.7849556676	-1024124.5917051954	-1061980.7718929187	-1059431.0583527808	-935038.2315745137	-762491.6106070422	-975955.6771671943	-1007814.6039109135	-1009276.4100827174	-891317.9202217478	-725203.2830398697	-870415.9362961059	-885822.7318499674	-919036.7027807244	-815686.4966652079	-868772.742038319	-1082281.7198211255	-1124034.6741576514	-1117333.591383709	-989071.0358108443	-846947.7169694386	-1062331.3100881765	-1098981.0381063828	-1095345.0496112152	-968653.9055409854	-802733.0498498501	-1012419.9105874252	-1043296.4798482782	-1043552.4728537861	-923126.966483987	-814851.7582081589	-920503.3079108347	-920173.0705609916	-933513.9583434716	-812590.1976244552	-912073.6272469683	-1121977.2933050678	-1162359.5276565312	-1154615.2114221961
385	-592745.7674290618	-705715.3239829895	-822057.176560937	-827754.0479227791	-738266.6046221647	-707723.8685121139	-909401.3333309197	-934037.3050990378	-903648.7018235768	-763248.7305382176	-686837.663987873	-895689.3311622412	-914903.3247092769	-884499.4997843874	-743799.5279159185	-677341.8550562034	-888537.6304504847	-908826.9761263285	-882620.3593573844	-746913.8805618859	-698315.5899637367	-835717.7955434804	-879863.4873954671	-861559.3644496939	-747589.0258780568	-765425.440618557	-965260.8260913034	-990881.1280083312	-961618.3887439634	-820312.094852536	-742564.9307651273	-949143.5934340378	-969470.8906272104	-940372.1054037537	-798978.3391723303	-727948.6965978764	-936575.7792190989	-957804.095521158	-932716.2854807777	-796259.5159380737	-803885.4090687159	-965720.2670904332	-937669.7391822569	-895364.6184856342	-756911.4475626609	-823126.9433204811	-1021120.263256206	-1047724.9509176244	-1019588.0756417863
386	-610930.3328246488	-797011.6667545167	-871126.0052287206	-882833.4348039561	-796046.5129382464	-778696.3159104134	-991172.6261823353	-1033860.4890776463	-1028249.0072518655	-907381.8660895885	-756771.8829533708	-972066.2030306512	-1011884.8249326729	-1007196.0809211897	-887122.3047556756	-723140.7829144002	-934748.1345801272	-972272.6695347519	-968393.5823189224	-852256.2045390629	-702039.9180916239	-851239.39870634	-907706.1249330435	-900667.0831217311	-793377.2281100788	-826847.7047321191	-1036219.5523028438	-1077679.3825364418	-1070907.342870315	-947255.4381478288	-803820.6483046435	-1015736.7217703008	-1054349.3782104554	-1048585.0773328699	-925720.028886561	-767901.9965472368	-976132.1699284615	-1012521.8126871188	-1007572.2369346353	-888571.6521546063	-793149.5066241022	-905467.1306198959	-944286.1886003414	-918500.6689735218	-790707.943307423	-874999.0180853554	-1081266.4159233524	-1121498.2889637067	-1113565.678531284
387	-604649.5933727057	-790771.3462147618	-864413.4030057016	-876329.4257998497	-789759.0595076986	-761329.0418054063	-973900.4217537389	-1016918.2733803409	-1011056.214700724	-890043.9712194663	-738127.8439195324	-953468.1155091878	-993574.0050807503	-988657.5281157799	-868487.5168469206	-707761.2280959231	-919453.2796707881	-957258.2109409247	-953154.0565857193	-836892.4361836896	-697258.2959800761	-846446.3977063054	-902576.0240632363	-895740.6101727125	-788582.3460510682	-811541.1870236757	-1021010.2830699013	-1062791.7409313913	-1055772.3814478584	-931976.4101064428	-787290.144937233	-999253.9776071745	-1038146.1445920981	-1032158.007933475	-909198.1705366516	-754340.8728539116	-962656.3958483964	-999317.452822836	-994148.2021699578	-875025.317500228	-789867.0015853493	-902121.4491627172	-940738.5885541206	-915151.7320768035	-787405.6326178588	-861753.2578362108	-1068120.0818860638	-1108665.2203881757	-1100488.548234028
388	-604372.7663733221	-702702.8537070724	-828589.6926646965	-832584.8407497236	-742034.6898534835	-735759.5150736105	-935058.4322621158	-955303.1173884701	-920594.7018981819	-776661.9739275955	-718178.5989177709	-925637.3446598463	-940056.0186119254	-905090.3849000003	-760521.5903903759	-705559.9950611322	-916468.3388345216	-932649.1976461381	-902548.0598784613	-763250.9825358633	-709180.1621178858	-844263.5977978783	-886776.8943609489	-865738.0150742102	-750119.5999629218	-790358.9533940989	-988061.5814814575	-1009750.9116430751	-976615.2068315641	-832147.2499918885	-770502.2623254682	-975903.4403235479	-991915.5297519391	-958718.95938304	-813870.0328178388	-752916.0346851116	-961414.9103568102	-978969.0152982546	-950409.0309188383	-810777.1904709076	-813987.5537506136	-985824.3418724532	-944964.0376960888	-898891.1269095175	-758204.5105863396	-844958.3209368127	-1041064.676478574	-1064198.70589768	-1032635.7117378947
389	-590995.1319848541	-742929.9013889633	-822606.7613219268	-829064.310743978	-740945.0552072993	-727483.8583484364	-918391.7250021833	-949203.4883848354	-921399.8988544968	-779860.1732772395	-709420.5184792834	-907269.6680999831	-934575.656596095	-907540.8552554658	-765519.1888546785	-695082.3274952756	-896978.0880789531	-926378.6473790233	-904767.8950936776	-768162.3186384882	-685945.2479798826	-804970.921797733	-869454.6676579025	-860163.4158446866	-747864.4267059818	-782280.9799776782	-972252.4284194411	-1003743.7855152991	-977033.6657856458	-834815.9615270109	-761993.4128006923	-958521.3773796535	-986528.3675760559	-960698.9521621319	-818257.0675747066	-742927.6311506449	-943104.7705430945	-972950.977338229	-952249.4224512273	-815161.2192669221	-780895.362065031	-867011.9426839727	-916302.5143637244	-891262.4594078743	-754783.7982046644	-837078.0314171393	-1026113.069361829	-1058284.0826708928	-1032667.4250270146
390	-617590.7359380613	-802683.9311775011	-840427.9823136248	-886626.1667273163	-801139.1399483356	-779579.3201681589	-996076.6673017472	-1039837.4222292986	-1033645.3491836064	-908232.8055249478	-755999.4795567797	-974630.6343603518	-1013456.7831027902	-1010034.6502386134	-886199.6677589992	-722219.018765996	-935537.0689832203	-969008.0012399248	-969035.1745521531	-851130.7873906078	-710743.5285643586	-856638.7804420189	-878599.5517592129	-905113.7612064444	-801349.5481135554	-828201.609749494	-1041187.2080641595	-1083584.3909848407	-1076335.3485472049	-948578.8240196935	-803513.7959639168	-1018385.6637524884	-1055988.6548378067	-1051490.5845175777	-925272.9690576682	-767198.5815035345	-976811.7939145385	-1009253.866756261	-1008110.9049455076	-887673.4257593788	-803896.3276472165	-910593.6264357789	-916771.0603401797	-923601.289957292	-801559.9628202905	-876823.836830829	-1086297.6863690491	-1127331.372695981	-1119025.3349127276
391	-609645.2043733146	-826212.5035962784	-907821.6963953082	-901655.6536424049	-859275.7800892373	-738062.8125354514	-989694.20686433	-1071498.8151085135	-1091739.9872041047	-1007435.3097702144	-694075.4116480998	-939077.3766249388	-1018951.2580225195	-1040277.0319284986	-961130.6130276076	-648319.6459026434	-873843.0160872495	-943887.3407997007	-956795.8511040317	-880597.903458772	-708620.7713622398	-879597.8538820272	-940406.3259466533	-913423.2572986349	-853635.8392811038	-791227.4475992385	-1035719.2675731934	-1112124.8952274055	-1127567.8290861982	-1036773.142161058	-748659.7234331171	-986560.8887912292	-1060987.4738997265	-1077644.424288976	-991397.4669896036	-702272.6577263712	-921525.2452122493	-986701.7281572071	-995602.6594367124	-912106.7367441996	-807596.3383048747	-932983.2041214857	-972990.8929979984	-925190.7913724546	-847995.8984729705	-844392.0201167352	-1081744.2516172365	-1152750.9894648273	-1163395.6427312314
392	-590249.4723302694	-706362.0957614235	-820654.6574749051	-826716.8856666376	-737457.6037148914	-701704.6672170549	-903892.8017985595	-929471.5746603888	-900010.4270518004	-760368.9320715338	-680108.8234132638	-889259.5482345024	-909503.0880005943	-880078.6749575926	-740209.3321313652	-671283.4727574663	-882540.9591874077	-903712.3893694762	-878341.9190324608	-743406.3350824701	-695982.9864820561	-833883.0276566704	-878379.1917481876	-860662.2159143278	-747045.7163176566	-760072.2616911615	-960365.5462171012	-986829.8204758798	-958398.5997279818	-817771.1090049025	-736566.8375183876	-943398.3039612373	-964652.0682544016	-936433.0698980043	-795781.1201790017	-722588.2554388251	-931242.8638542152	-953260.0265176956	-928917.6858650948	-793142.5981542231	-801716.4973506012	-961403.9595389572	-936103.6668263118	-894607.4836706581	-756633.8293308271	-818439.7870555845	-1016838.2347453265	-1044188.0662913708	-1016786.7723825631
393	-591421.7241646374	-777628.6033024187	-850275.9873508596	-862631.3284511687	-776517.0499851773	-724751.815171585	-937523.4214236567	-981236.2625194214	-974846.4637744069	-853528.6202102371	-698861.6218868004	-914298.6719848242	-955009.5761712212	-949613.4706933749	-829240.7786143952	-675370.3382693762	-887240.7763747743	-925636.2504968146	-921058.0821014668	-804534.7942367584	-687187.7187211524	-836351.8553633676	-891771.5154780231	-885364.9624762388	-778483.8420086685	-779304.1206993222	-988978.0318193864	-1031436.8698250469	-1023896.629922538	-899797.2397867222	-752475.241666569	-964539.6600259168	-1004020.5043404398	-997560.947006225	-874401.4745426438	-725779.7819342355	-934275.0598015027	-971507.7424221025	-965875.8343269036	-846495.3737845395	-782953.7157119773	-895075.1073957894	-933266.9859230915	-908098.5340266664	-780450.6340511778	-833856.3540595528	-1040432.5797151161	-1081637.486798179	-1072946.7961023657
394	-615033.0350271657	-800171.7131534057	-838855.5029437441	-884072.8604345352	-798627.0594360761	-773045.2129726935	-989454.7206943586	-1033306.1711465007	-1027038.0405545156	-901710.6903428503	-749037.833389982	-967583.7529548986	-1006548.0044827836	-1003001.6577581249	-879246.1003806078	-716485.062666734	-929782.3232783767	-963482.7706574183	-963305.682921144	-845408.9988273471	-708684.7686589635	-854677.2079871884	-877571.1253370714	-903131.4319817794	-799308.2731462768	-822425.147872899	-1035336.2281405161	-1077825.1354387593	-1070498.075259723	-942813.5987347433	-797329.7341769959	-1012128.7432186154	-1049867.4585850884	-1045246.6462432288	-919096.4511339648	-762139.2328946197	-971741.9593584314	-1004406.9264415122	-1003064.7833728712	-882625.5995136613	-802336.5085490841	-909182.6996506365	-916286.686815566	-922189.9378998622	-799989.4931971467	-871805.0202731044	-1081217.6731278468	-1122344.1122888364	-1113958.0973659386
395	-629779.5534500759	-761108.6981088476	-806147.6447092335	-803128.1284941629	-711736.3560494332	-844347.8793392649	-1002357.8415497529	-1000225.181684419	-942160.9832770167	-767865.9067618228	-856059.3865399485	-1036350.5000789969	-1027633.1737750287	-967302.4833301329	-789078.342899227	-839041.9246119836	-1046066.8944442475	-1044076.9506477249	-993662.1535124013	-823113.783574156	-706451.0441031522	-817597.7298594918	-853019.3859188296	-835112.3422426701	-714300.3945375881	-884513.5167538292	-1045629.8205669945	-1048045.3453620935	-994764.7184964672	-823595.9040181392	-890766.0763833007	-1073266.2846680623	-1069266.3742113304	-1013928.6442061526	-839694.6492954924	-868508.5835077051	-1076164.5039997762	-1078112.5156875337	-1031838.3016848289	-865292.4376021359	-783122.5376493392	-874086.7601674076	-899891.0646322524	-867096.493418467	-716864.4337528476	-924679.0916683936	-1088901.713702086	-1095865.5090780365	-1047368.4595327537
396	-586626.6905646434	-759571.2291801678	-819560.1804812374	-826546.9306634243	-739605.4616066811	-723684.9503390612	-915016.5421726374	-947067.798997093	-922628.6103253284	-782943.4363444844	-707138.1652442389	-907743.2492985902	-935127.374318544	-910890.6239866947	-770659.0161956034	-693883.3208144805	-900985.8370080029	-928785.6138855815	-908606.0460799914	-773426.7349508012	-680493.9502117421	-820442.4379731058	-866304.3448692262	-856350.06992867	-745388.8978651088	-778408.0674309436	-968807.4445842768	-1001454.0528171832	-977842.0364404722	-837354.819836512	-759553.6930618838	-958739.416993674	-986795.0089526745	-963515.1839177528	-822763.6009033399	-741700.1534677781	-946865.2616610337	-975111.53819029	-955616.6609031049	-819874.1014298105	-774361.2137157561	-881313.6448515698	-913048.4457961643	-886153.1457226949	-751172.3349116998	-833131.122022826	-1022598.2844704913	-1055840.3066372734	-1033055.462555616
397	-671263.7185288994	-778592.9809898171	-813504.5802512069	-802981.5393885665	-708441.3033842515	-964936.3039471144	-1098780.8438258008	-1075427.7709695678	-995905.2690635168	-799169.0870327287	-998028.4599183023	-1162869.7747427074	-1131544.4431143864	-1048248.8735376894	-845273.0394482303	-970922.5712505425	-1175507.835353003	-1154865.4470024433	-1085427.597569782	-891900.4775922655	-733715.8060322036	-828391.8031584106	-856458.0390600015	-832750.2070514285	-705366.3575124594	-990708.20827057	-1130345.6559098153	-1114094.4136975734	-1041920.4837802273	-850872.958996148	-1016169.1342018368	-1185637.2305867928	-1161643.6903872383	-1085956.7251700223	-889909.3743316544	-984105.0059358843	-1191059.0000173175	-1176605.945201536	-1113543.9029958036	-926991.613836648	-796167.8976854524	-878190.6232575212	-899411.4353742856	-862518.812109993	-702291.4126836428	-1016480.0500940257	-1161910.371953935	-1152761.0564804722	-1087935.7068407412
398	-675619.7859238575	-684243.272720388	-868619.1366157949	-862186.5971991651	-765124.4693770619	-907554.1689008474	-1092278.0069713183	-1085614.1074562166	-1024435.0827571466	-858854.6032191694	-910227.1416575806	-1109150.4518160901	-1094184.7394298874	-1031265.6087413265	-862989.7438454924	-878472.9180130502	-1087619.9606621081	-1078625.1533072442	-1024659.4727571275	-863360.2049860524	-775755.2421007544	-896629.8999892671	-929140.3317012135	-891343.6252722522	-765626.254961584	-943144.5931536609	-1127778.276463289	-1125379.7037315662	-1068511.5419568513	-904669.7928801659	-941694.469137527	-1139880.348177956	-1129450.0431883296	-1071143.383812726	-905122.1945655523	-905908.9465580602	-1113622.205658962	-1108661.7640783447	-1058825.2599192234	-899737.466998647	-875890.6899858507	-1109016.5272254155	-989661.4726329843	-920500.5908671598	-766128.041582581	-978734.93821377	-1163278.500147964	-1165145.3000069156	-1112588.0011020044
399	-614084.5908921071	-800145.6259891985	-874497.1496421457	-886099.8213542972	-799204.1428413525	-787418.356503664	-999846.9217137056	-1042369.0605528271	-1036883.4212442815	-916089.1521003	-766135.129268946	-981406.3719793448	-1021080.7248233833	-1016506.3508651812	-896480.9050520757	-730864.5685022727	-942429.3829199963	-979813.0996879956	-976047.0437235862	-859972.0619874253	-704441.3025522102	-853646.497772839	-910282.5193495414	-903141.2133037671	-795785.2718655743	-834534.8102610096	-1043857.8185524195	-1085156.1237700926	-1078508.2909008348	-954928.7380564176	-812122.4532122919	-1024014.541467838	-1062486.8245654074	-1056834.9365372201	-934017.4921690865	-774712.5455503861	-982899.8553948824	-1019153.1908785277	-1014313.938334337	-895374.773935887	-794798.0176122081	-907147.369516637	-946067.8332858961	-920182.5427886527	-792366.4009163579	-881651.1880161678	-1087868.6528911334	-1127943.2004895452	-1120133.1606016576
400	-603836.389623633	-702841.824994752	-828288.3346124748	-832361.9866007416	-741860.8605344463	-734466.1745435065	-933874.8188983285	-954322.0828730301	-919812.9489726142	-776043.1941438806	-716732.7788148788	-924255.782812589	-938895.6744624071	-904140.4861269393	-759750.1681548406	-704258.235742956	-915179.8393127306	-931550.2308525204	-901628.7551390771	-762497.3192992748	-708678.9576431334	-843869.3628230001	-886457.9650503676	-865545.2455512397	-750002.8595117534	-789208.7205089846	-987009.7369663545	-1008880.4107286205	-975923.3735751865	-831601.2705799916	-769213.4572632883	-974668.9549876858	-990880.1135934462	-957872.5822609978	-813183.0491625349	-751764.2413706183	-960269.0314856914	-977992.635156492	-949592.8291339548	-810107.4610664159	-813521.5215822663	-984896.9006351414	-944627.5370954722	-898728.4420124756	-758144.8589991065	-843951.1957600391	-1040144.6007488044	-1063438.7385842109	-1032033.7981509143
401	-609499.0807121499	-865634.4899841961	-970371.1701976864	-1016113.3179149901	-904879.7483202745	-705757.9733621591	-1004484.5431663843	-1129897.7676127583	-1204985.9241385981	-1164038.3011430395	-633160.8109042251	-912424.1191736868	-1039949.4276992619	-1119271.6401925725	-1082743.7106822045	-564394.6230272106	-803000.8685162255	-915346.6251172004	-977597.9057764781	-930951.4127772651	-715588.8987408258	-913877.3829363862	-995979.9368851732	-1014840.0091993501	-891430.6238863459	-762394.1240342532	-1048944.4576123157	-1164033.168568222	-1228455.6959053604	-1175403.418563803	-694771.9033935268	-962357.2127362626	-1079314.7439862709	-1147897.0517393183	-1098277.0744645828	-628498.1151749383	-857420.8083141826	-960335.5472931524	-1013165.8317969528	-953566.1729368719	-821678.7081891787	-962120.2758324957	-1021588.6495969023	-1013566.6551443563	-877981.5080888208	-819030.2122063471	-1093404.309558247	-1198168.5694676056	-1251925.4334629914
402	-641261.4875240407	-834334.7203804402	-765857.5137118669	-908063.1657698773	-821262.9802903418	-810255.4593090874	-1039928.0242981182	-1102426.2615328976	-1077546.9366895251	-939199.9489488697	-787666.6404960615	-1021224.0215735694	-1083159.17989624	-1056711.398843085	-917886.3849466273	-749439.5965668355	-978500.1455537373	-1035416.1482775088	-1012297.3225073951	-878624.783002933	-733457.9963578427	-903459.1936602567	-955682.046821359	-946881.719631623	-823592.4702586441	-855969.2725795134	-1081114.5833853763	-1140783.8494263191	-1116308.8308750028	-976617.6249674404	-832125.3566426586	-1060775.2051737525	-1119804.4956247213	-1093958.1279737235	-953902.9967651076	-791514.6859879105	-1015650.0306399739	-1069844.466453509	-1047224.8726483292	-912239.8952509923	-825654.4971925142	-972583.6668874472	-1145506.5094685585	-985700.2029416123	-825921.968173451	-901683.0233499395	-1122301.0799200085	-1179141.4372671149	-1155070.7090095934
403	-572445.3504544902	-774207.0232164934	-849271.4981646766	-853185.0580762109	-790188.5703037428	-653503.2615095733	-886378.8102680811	-950861.6161078407	-956831.4359647314	-853603.9745212102	-612715.9898319417	-843329.8663008147	-905161.311442575	-912273.4387785741	-812343.9169674611	-592610.2188189428	-811774.2998196875	-867454.6085286415	-870720.3113801703	-774058.2284155369	-676568.4121715445	-836726.6459019502	-893361.2170854078	-877449.9502300078	-795006.0944123655	-716606.8473572703	-944347.840642632	-1005440.2482334318	-1008427.1557539204	-900544.9827951523	-676312.0776461702	-901673.646308956	-960104.7596227168	-964345.3210079394	-859451.2000458558	-652979.7478004544	-867305.3598555785	-919906.45466536	-920646.9270563177	-818887.7524364628	-780691.4738651594	-899246.2685639674	-937450.873506139	-901714.7762975581	-799823.6185209883	-779710.3706815279	-1002316.8013446901	-1060018.8875080764	-1060022.8612450028
404	-591827.0039549218	-837525.0773430141	-930376.521170504	-964026.6486813629	-893994.1304756119	-683482.7969208374	-963503.2309476808	-1067326.1199636543	-1116097.55076294	-1052084.2920178254	-620105.9919016506	-881703.6659149115	-986992.6840253446	-1040753.9292634345	-981795.5940071648	-567459.4581507175	-792711.1970030523	-886304.1483905218	-929476.6061315009	-867482.7500086618	-699356.5869895819	-887923.883365535	-958307.5808069038	-969203.1434595154	-885891.2355592059	-742716.1104403611	-1012386.8915535043	-1108027.374814039	-1148793.726519031	-1075198.9904849606	-683371.9360017432	-935067.7203985368	-1032015.4565145758	-1077696.8409415507	-1008128.4814853319	-631710.4956726932	-848823.2857809378	-935070.5114628393	-971212.9777816923	-898506.833919993	-806886.1734590799	-938322.6825629884	-986238.5711628443	-974379.5553070738	-877788.3542929349	-801949.361504493	-1061270.503309463	-1148728.6160588968	-1181489.9158360406
405	-610177.9089054547	-874731.9060696238	-975397.0967020886	-1015233.4792122887	-949701.554992908	-720706.9574533849	-1021898.860489076	-1143934.9421690009	-1211025.601351854	-1165709.1368329981	-649078.905704435	-925265.0096511838	-1050316.1373476768	-1123604.796464832	-1084512.1882229603	-577663.1484274549	-806936.7781567532	-917320.0613768197	-976374.3174034375	-932131.6737269943	-717109.9539648778	-918276.8874889272	-994410.972457806	-1010233.8357199583	-934056.9513576933	-775454.5014849525	-1063977.6049933936	-1175645.9022052279	-1232535.9224529332	-1175466.312795964	-709291.4308843708	-973488.061809759	-1087952.4709735732	-1150912.2595720275	-1098710.4090734029	-641052.9827344915	-860666.4909306943	-961758.2193643966	-1011860.8681890279	-954395.1135279576	-824042.0035545921	-961821.8599064834	-1013424.776770611	-1005234.1027812207	-918412.3657259733	-830201.9830753552	-1106056.3050012062	-1207356.8442967953	-1254046.2614398375
406	-651595.8322821681	-766513.0585881252	-858293.0762922288	-856420.2121997698	-764053.1649754897	-899234.8720662775	-1065854.0298200743	-1079671.2581236358	-1031419.9067877274	-869680.8001103015	-901947.3758004284	-1080554.6479022307	-1090742.980506365	-1042798.0032792806	-878576.8548557177	-865655.7313788717	-1056068.742960667	-1073131.157275199	-1035506.5995038494	-878648.03524826	-731100.7868163612	-818029.845716266	-895476.8843783182	-881123.4059551521	-761755.4273666108	-934260.5072864706	-1102231.697822312	-1118876.1231829813	-1074084.5170544905	-913905.3247278085	-932861.9198698117	-1112322.696339683	-1125351.0533120348	-1080998.152358441	-918871.7354738333	-893083.4818035278	-1083541.8037192817	-1102856.0283880956	-1068185.9260948142	-913363.3892383346	-810605.7373996959	-869546.6338321215	-932660.6359010924	-905826.5392015593	-759457.6897577321	-969286.0640992599	-1138609.3033765343	-1158080.9882943118	-1116749.11141385
407	-569773.8045898709	-789168.7883989543	-874687.4624885317	-903797.706903331	-806872.0544390231	-632345.0764389904	-886129.0124394342	-969975.4954659148	-1000824.9330250625	-916730.4471343651	-578282.9451132677	-824055.4890298389	-907107.6858730267	-940589.4536925065	-859314.2824213423	-549114.8653737942	-774006.8375745686	-848640.9982365445	-874513.1282723346	-790362.3815280554	-677613.6675035863	-849901.1385515819	-916290.7343122599	-922783.9378001806	-808736.6567719656	-697781.9594839826	-944195.2025771998	-1022467.8324563579	-1047692.991563348	-956423.0768138174	-645824.9190516679	-884314.8517722345	-961693.966175158	-989565.4320233337	-900648.1645059588	-614722.5431736036	-833266.0310348142	-902793.1027566508	-923689.5356115889	-831927.4266785019	-785453.5263689063	-910633.4886777494	-957893.9476579237	-941770.1142938213	-810601.2631797635	-763218.7800289749	-1002261.3302149654	-1074960.1694203408	-1094561.0339609717
408	-639735.3240398327	-832715.8428891508	-766190.7129094304	-906570.9123705769	-819808.6171997859	-806781.6745615581	-1036225.4583451976	-1098498.5178033507	-1073850.4558047447	-935727.5847686813	-783980.0568405666	-1017284.8858112673	-1078954.52774664	-1052777.5274281525	-914203.2761819365	-746386.9094161376	-975213.2061803255	-1031901.3737500507	-1009017.8509640491	-875573.8488773362	-732177.313878243	-901879.7601651012	-954104.4718639553	-945364.7227007499	-822326.6396942578	-852889.0296320415	-1077826.236962646	-1137291.709575396	-1113026.1955911163	-973538.7349956958	-828843.678637471	-1057263.1074992768	-1116049.782939816	-1090450.9498150428	-950624.5606317017	-788816.8991461742	-1012740.1897719712	-1066727.863171646	-1044322.116515419	-909543.8905335802	-824619.2958316432	-971043.6773891764	-1142018.1604697828	-984158.4625940378	-824844.6700218646	-898996.322202525	-1119426.9530282193	-1176084.901295566	-1152201.919555593
409	-570813.9726582397	-773070.8389420966	-852103.2214017434	-812843.6269703574	-792013.7679592024	-643560.8731776054	-876930.1734879869	-946025.7239462984	-960005.9413728612	-848085.4545578327	-602511.124646538	-834773.6626715239	-901965.8891326797	-919037.9220882411	-808611.0730637695	-584967.0509013995	-807273.2254756723	-869069.9010422998	-883004.3257279545	-775813.6406936666	-675334.8356108279	-837309.6409060691	-905359.8269679856	-907107.1714182512	-807995.1685339367	-707954.5253095283	-936231.2609226672	-1001681.3570142427	-1012161.8701283671	-896298.497619597	-667266.0576000317	-894264.5996034731	-957736.9298552292	-971313.1512201208	-856763.0408178546	-646140.3639711265	-863508.6490434643	-921828.2388641927	-932553.1058624065	-821109.6283773995	-779855.702098021	-901548.4464279007	-958616.3735688328	-1001370.6533707959	-823976.5690854171	-772348.1114068462	-995532.2787881377	-1057336.9900821869	-1064317.7917914093
410	-579364.685395681	-783880.2692004829	-860162.0901899816	-862200.8000802886	-803039.0923972247	-669231.7065002858	-905595.924270501	-973300.660843722	-981925.014409771	-882217.2732551564	-627849.1968438852	-861139.3204767219	-926326.737388735	-936082.6649280365	-840018.8908283759	-602972.4150311949	-823319.3515331211	-881671.4298153026	-886730.7368751959	-793875.0722600967	-682530.290661168	-844700.8774135825	-902111.812350273	-884141.1421119248	-805911.4824590127	-730486.6041894768	-961343.324236915	-1025284.0574925985	-1030587.8401938095	-925884.0141024133	-689769.0550444927	-917463.0433385961	-978869.3841124343	-985419.4479614692	-883993.7807026464	-662148.4438589831	-877390.4948153674	-932330.6666202532	-934589.0199267352	-836226.8897543232	-785695.8958989653	-905521.4855989922	-944061.4720105645	-906081.417407013	-808783.8725208006	-791741.439350978	-1017090.6532302327	-1077267.4625868814	-1079250.649087035
411	-620733.6631452542	-844267.6611400202	-927326.5535386142	-961375.0064427526	-879737.2741855553	-779319.3710677684	-1034352.2879042955	-1116331.0378862622	-1138758.103985691	-1059879.9626219159	-735911.3771727277	-980811.4063850731	-1062105.8277006417	-1088644.7066637548	-1012767.5269016097	-679013.7842248917	-899845.4079713313	-972255.848366288	-992913.1745872841	-917168.8460645297	-716881.9671911875	-890831.7472995277	-954741.1192858606	-964950.896082225	-867782.8604413668	-827250.5692317326	-1074619.5403542817	-1150944.0390788906	-1168087.0912144226	-1082056.0462685577	-785777.1740234066	-1023184.3664596465	-1098739.6665929896	-1119978.658019972	-1036299.4177225973	-729670.9356141461	-944107.8602749673	-1011448.4470791918	-1027485.3471537933	-943806.2071285243	-813030.2669819983	-937395.8334590353	-982155.6139668737	-968526.7402981756	-855828.4381309451	-875181.7048956967	-1114886.7302482792	-1185557.0573479969	-1197416.0784991428
412	-613652.2511560232	-834301.0850213533	-925860.2839254957	-823842.0784793332	-877266.4484421273	-733625.979608292	-990137.6815772732	-1085481.168030702	-1126024.3366912403	-1026672.9665873032	-688418.6373680113	-939923.613373314	-1035107.98654679	-1080959.9040649545	-983224.0830727906	-643021.8642091434	-876663.28195861	-962913.0931017885	-1000959.9583450172	-906039.9037176227	-712447.1980674579	-889567.5577790008	-976027.0185338586	-985164.7039021599	-893760.3126711551	-787576.0148736569	-1036632.3546821456	-1125614.9303704454	-1159868.4665487292	-1055201.16039941	-743691.4532447762	-987694.9843840591	-1076322.176835137	-1115784.0708280625	-1012342.1554222633	-697418.7540460342	-924282.6057215366	-1004436.9884806821	-1036688.4577841519	-935858.1227951405	-811242.1526588287	-944834.0382671101	-1026193.6983221574	-1146487.2668350919	-910254.176849657	-841525.9799590857	-1083126.949927146	-1165748.6927101887	-1193712.58099582
413	-643538.4741604489	-836750.0333215443	-765360.391268587	-910289.559654609	-823432.8430579598	-815438.2339788585	-1045452.1331386564	-1108286.3283448457	-1083061.9668048942	-944380.6041780404	-793166.9042649323	-1027101.0849305228	-1089432.3851291332	-1062580.6079637562	-923381.4642906277	-753994.1072199857	-983404.1529588329	-1040660.0783753144	-1017190.1881511796	-883176.6781992399	-735368.7332623127	-905815.6574328326	-958035.737715624	-949145.0300664568	-825481.0485852056	-860564.8955916337	-1086020.6900626195	-1145994.0093176411	-1121206.4167175116	-981211.229383465	-837021.5142562608	-1066015.1414933477	-1125406.4057054876	-1099190.7245346108	-958794.3176106964	-795539.6968403353	-1019991.4192520565	-1074494.3379104133	-1051555.69106443	-916262.2472314726	-827198.984194782	-974881.2814903748	-1150711.0135308888	-988000.4297551641	-827529.2622280999	-905691.494704409	-1126589.1844328365	-1183701.6902366907	-1159350.850237594
414	-604268.2962812446	-790392.5029129819	-864005.8879792694	-875934.5742485193	-789377.3548176525	-760274.6928464158	-972851.8443748909	-1015889.7292705721	-1010012.4583334995	-888991.4058429499	-736995.983903513	-952339.0451611925	-992462.3744510725	-987532.072057829	-867356.2184569828	-706827.5514858485	-918524.745103183	-956346.6989389552	-952228.8809942498	-835959.7179531995	-696968.0087268713	-846155.4196527391	-902264.5810308472	-895441.5291773941	-788291.2538003884	-810611.9444197938	-1020086.944318765	-1061887.9278555335	-1054853.553845804	-931048.836371358	-786286.595450328	-998253.3275313696	-1037162.463307718	-1031160.7378140655	-908195.1458796738	-753517.5912863871	-961838.2957661957	-998515.830012436	-993333.2431272195	-874202.9337597155	-789667.7241541552	-901918.3363575549	-940523.2174836216	-914948.421637328	-787205.1528064185	-860949.1216519551	-1067321.981762639	-1107886.1382817116	-1099694.649396932
415	-576928.4642626162	-766093.4838535619	-779903.0022518229	-845159.5688469379	-759956.5897866755	-663823.5224422707	-883852.1752551096	-936858.3971903792	-921727.5941310794	-792827.8938658396	-632264.5000843313	-855175.9439932032	-905918.6762769322	-890885.2315529956	-762630.7230958387	-620758.3671259294	-839944.3817992827	-887256.351654557	-874056.3533934283	-750017.4495802298	-679472.8390643258	-836880.6568028883	-889181.8537021668	-882935.0980204939	-770233.3721106823	-726126.4718304265	-942499.5076781249	-993578.1820215703	-977934.4992504792	-846831.856783895	-693791.3775972886	-912728.2470815139	-961530.4830451666	-946118.5443386483	-815705.673729985	-677793.7213339441	-892990.261758517	-938468.9529496056	-924863.7496408086	-798594.0532472472	-782017.2106774747	-907667.8297312373	-998460.6394786342	-920710.5614845119	-780510.1576022722	-788429.3587185823	-1001146.7775801629	-1050297.966831784	-1034141.3979717805
416	-648152.5241670103	-768852.3327407191	-809405.9665537787	-803063.2054725853	-710277.0062948194	-897755.4286996413	-1045062.7385602284	-1033531.7449995622	-965963.8532897478	-781729.8091296654	-918936.236608755	-1092384.770603842	-1073654.5582021694	-1003152.9253987903	-813966.4782197783	-897450.6994834708	-1103395.1451724516	-1093144.1982452306	-1034304.2590794093	-853578.8034801392	-718526.3666165698	-822378.3296922389	-854542.3350573359	-834066.1734065453	-710343.5883602237	-931546.208717707	-1083149.7166299098	-1077297.895006103	-1015649.590906143	-835676.6710144839	-946305.9843153066	-1123034.385216215	-1110179.4725413567	-1045829.2457930868	-861934.3079916553	-919705.2191449371	-1127050.2626225236	-1121734.3866552336	-1068024.9916530058	-892618.4584118046	-788900.2125158806	-875904.3249234463	-899678.6410654562	-865069.0787538054	-710410.1712926289	-965336.9262357727	-1121236.6043186656	-1121064.0450582753	-1065335.3354585455
417	-593706.0803585827	-779898.2588081541	-852717.4155589506	-864996.8896032731	-778803.8481079319	-731068.4344928091	-943805.4631277346	-987398.2846289873	-981099.6227305974	-859834.5540639783	-705642.6110319449	-921062.948189921	-961669.3707805988	-956356.0936363976	-836018.4030498511	-680964.007864895	-892803.6399221285	-931097.131615985	-926600.821975935	-810122.7221668176	-688926.8337045388	-838095.1089413563	-893637.3750296213	-887156.7608912985	-780227.7797431577	-784871.2261018873	-994509.7671577955	-1036851.6265704829	-1029401.338903869	-905354.3469730434	-758487.5206418887	-970534.5685888892	-1009913.7526372762	-1003535.606203283	-880410.6092545488	-730712.0732898532	-939176.3088062645	-976310.2758616523	-970758.2653204295	-851422.2862460031	-784147.5895821332	-896291.9590448908	-934557.2770108262	-909316.5697056951	-781651.7113981618	-838673.9451569333	-1045214.0086878564	-1086304.9785660105	-1077703.0551101048
418	-541248.5587084698	-771870.2109042738	-815720.986470838	-808566.0727847202	-716346.691596834	-824534.2274842038	-970689.2580359033	-962588.820288032	-908358.9130211639	-744031.0202040644	-827305.1865251351	-983536.3979857173	-968660.856275995	-913712.3128783209	-746339.7540320869	-815564.4696139714	-988986.7978510973	-979683.8362641968	-933384.9574943455	-772415.4638138126	-737816.337721037	-846664.7532476144	-867438.6417816371	-842569.2574527848	-721567.0292087877	-869784.7228313603	-1019527.2544813018	-1015856.411818913	-965462.0606295052	-802865.1230849767	-868216.9868954024	-1027547.4771953437	-1017371.1337934923	-966467.8387398096	-801383.836383596	-850658.8979923518	-1026151.9426245233	-1021090.9770781904	-978294.9519585097	-819581.9839106626	-934384.116727214	-921459.2955909551	-919156.2333751187	-876572.379540973	-726787.3662072901	-915035.1752003278	-1068365.1884267002	-1069124.0131266748	-1022565.2082378465
419	-670141.4613965647	-685662.6664847991	-865541.193341892	-859910.4594823741	-763349.0504712355	-894344.5375133622	-1080189.0823014372	-1075594.2371856072	-1016450.5900868309	-852534.6490673844	-895460.1486133863	-1095039.765329048	-1082333.4766410151	-1021563.7457319369	-855110.7644596754	-865177.3006964342	-1074459.7732794073	-1067400.7727880562	-1015270.0842261297	-855662.6084800247	-770636.1522654536	-892603.3512366526	-925882.9230502173	-889374.7591601093	-764433.9175283642	-931396.6025290252	-1117035.1829020442	-1116488.7767600834	-1061445.450633156	-899093.390835661	-928531.1610949405	-1127271.8387711693	-1118874.7418906603	-1062498.8470207965	-898105.6350094518	-894145.018369864	-1101918.6850857928	-1098689.431605545	-1050488.9212171093	-892897.1350390625	-871130.8351639475	-1099544.035957044	-986224.5982813746	-918838.9963588193	-765518.7855817924	-968448.5889990245	-1153881.2370483147	-1157383.3163345593	-1106440.3111270443
[truncated: 9,580 more rows]
[truncated: 54 more columns]
