# Supplementary material for: Particle Swarm Optimization of Support Vector Machine Inversion Model for Overhead Upright Piers Damage-Inducing Factor
Source: Hindawi journal article supplement (doi:10.1155/2023/8871629), 2023-12-13
Supplement: f1 [file 8871629.f1.zip › data_dz.txt]

	0	1	2	3	4	5	6	7	8	9	10	11	12	13	14	15	16	17	18	19	20	21	22	23	24	25	26	27	28	29	30	31	32	33	34	35	36	37	38	39	40	41	42	43	44	45	46	47	48
0	-597660.2252	-786201.4638	-811350.6842	-798767.9639	-712758.3995	-678014.442	-887856.0813	-850674.0859	-812553.1856	-687833.7212	-614887.1846	-827436.9154	-803881.3365	-773171.4584	-650814.3079	-552154.1015	-764866.9299	-786669.1638	-773544.6078	-656755.9217	-710030.5812	-854411.39	-864070.5607	-839942.2399	-731351.6783	-752225.9866	-958041.8632	-919536.6595	-881007.2204	-753447.9328	-687993.6215	-896634.1423	-872227.9036	-841138.5341	-715925.338	-619510.7917	-828785.2525	-849646.0179	-835753.726	-715997.1916	-822400.9427	-922621.3161	-916790.376	-881116.4534	-749944.9573	-826437.4687	-1028227.583	-988399.233	-949461.2553
1	-532499.7987	-728043.5516	-789729.5725	-879708.8001	-832889.7279	-556359.9904	-774401.3758	-831195.4397	-958692.4893	-889101.7042	-520691.8111	-740716.153	-794585.699	-896638.0239	-814063.1533	-531865.1359	-747878.6098	-791913.6772	-817605.7742	-706231.95	-638630.2334	-795016.8962	-853936.9103	-922334.4795	-844707.1039	-630193.0632	-845212.3153	-902009.4649	-1028668.788	-954899.0432	-593930.9346	-810588.4495	-863912.34	-964355.496	-877791.2655	-598904.8154	-811449.443	-854353.192	-878519.1999	-764004.444	-744760.6686	-861990.241	-918144.1854	-964960.0919	-856524.4799	-704026.073	-916023.1924	-972823.4899	-1098645.087
2	-527063.5524	-783438.6219	-901648.2246	-848929.0544	-721078.0732	-558671.1289	-912916.2458	-1000353.423	-860681.3812	-689079.243	-522350.68	-850924.3142	-923650.6869	-811017.6385	-651213.9433	-525141.1778	-774414.6511	-823634.1536	-784814.8949	-656325.6299	-649738.8569	-867357.2352	-945105.7115	-875220.3813	-738170.0005	-634592.3476	-985476.6506	-1068884.497	-928021.063	-754779.133	-597196.4692	-921487.2426	-990936.8114	-877944.1971	-716402.6687	-593165.7975	-838464.084	-885857.5224	-846555.6489	-715604.1124	-772414.1614	-951275.8528	-988563.1272	-901511.6501	-755261.928	-710513.5039	-1058037.002	-1137415.553	-995360.7448
3	-526384.9434	-789317.4428	-912211.0154	-853200.136	-721243.1185	-557910.7536	-925365.3957	-1016628.259	-864649.1206	-688447.0139	-521701.5584	-860864.5731	-936353.1489	-813840.3145	-650414.5045	-524171.2679	-776886.196	-826882.9376	-785039.2323	-655531.9981	-650307.101	-874366.1583	-954500.4087	-878477.5243	-738480.4252	-634078.3527	-998145.6001	-1085125.549	-931948.3878	-754212.8667	-596735.7761	-931528.8735	-1003554.993	-880745.3886	-715679.0533	-592296.7139	-840979.5303	-889095.5726	-846818.2987	-714884.2318	-774229.2586	-959414.8786	-996789.7298	-903754.855	-755717.7322	-710245.8893	-1070925.752	-1153622.82	-999247.655
4	-642794.6965	-832736.6037	-827117.3864	-795422.3296	-708084.3311	-757246.445	-964385.4254	-867452.1326	-808355.7389	-682153.7201	-675870.7689	-886066.4393	-814879.0716	-767616.1278	-644469.1283	-564039.8284	-776803.8575	-784971.7496	-767218.6041	-651045.8393	-757278.2728	-898326.1119	-877578.6077	-839509.5706	-728848.9977	-832108.1718	-1034546.303	-936294.6834	-877297.033	-748206.9761	-749166.918	-955059.5151	-883341.9533	-836161.3866	-710099.6414	-631685.1845	-840961.6204	-848403.8632	-830051.7391	-710819.7162	-871761.8583	-963915.6201	-928039.7688	-883596.7491	-749613.6645	-906969.8361	-1104707.118	-1005137.234	-946238.3271
5	-526498.4261	-788334.3365	-910444.616	-852485.8896	-721215.5182	-558037.91	-923283.5433	-1013906.643	-863985.6015	-688552.7406	-521810.11	-859202.2787	-934228.9355	-813368.2827	-650548.1934	-524333.4645	-776472.8833	-826339.6484	-785001.7167	-655664.7159	-650212.0744	-873194.0667	-952929.3478	-877932.8373	-738428.5133	-634164.3073	-996026.9909	-1082409.583	-931291.6272	-754307.5626	-596812.8171	-929849.6268	-1001444.873	-880276.9496	-715800.0624	-592442.0494	-840558.876	-888554.0783	-846774.3762	-715004.6164	-773925.7227	-958053.8016	-995414.0076	-903379.7272	-755641.5087	-710290.6421	-1068770.386	-1150912.503	-998597.6529
6	-533332.4479	-724697.4945	-789488.7581	-844187.4111	-779978.6736	-561207.6095	-777196.749	-829294.8758	-893352.6454	-799047.4837	-524683.8091	-742765.7021	-791722.1828	-842749.5866	-742157.017	-533542.4714	-747984.6955	-790580.6673	-801216.109	-686916.6114	-640987.6438	-793961.1378	-849821.6671	-884231.3338	-793532.4712	-634791.6854	-847732.7219	-899212.8264	-962300.9812	-864472.2976	-597737.0118	-812457.0347	-860516.123	-910205.1219	-806189.5979	-600541.0103	-811560.7895	-852972.7121	-862324.9833	-745024.9898	-748642.8398	-863224.7812	-910154.5136	-924275.1916	-807086.2688	-708375.6985	-918268.6322	-969130.7769	-1031249.317
7	-528485.6113	-771119.2598	-879513.3702	-839978.7901	-720732.2126	-560264.5332	-886828.4319	-966248.6919	-852366.7855	-690404.1105	-523710.9468	-830094.0064	-897032.0448	-805102.5803	-652889.2071	-527173.6722	-769235.4057	-816826.1649	-784344.7847	-657988.725	-648548.0731	-852669.6876	-925418.6556	-868394.8758	-737519.4901	-635669.4496	-958928.2357	-1034850.562	-919791.1582	-755965.7723	-598161.8744	-900444.5047	-964494.7838	-872074.1606	-717919.041	-594987.0054	-833192.841	-879072.027	-846005.2531	-717112.658	-768610.5349	-934220.1189	-971323.8714	-896810.9026	-754306.7678	-711074.3035	-1031027.984	-1103452.417	-987215.5309
8	-526606.0846	-787401.6863	-908768.8736	-851808.3004	-721189.3345	-558158.5403	-921308.538	-1011324.709	-863356.1364	-688653.0411	-521913.0904	-857625.2984	-932213.7433	-812920.477	-650675.021	-524487.3366	-776080.7831	-825824.2425	-784966.1265	-655790.6223	-650121.9249	-872082.1305	-951438.9185	-877416.1052	-738379.2658	-634245.8504	-994017.1153	-1079833.008	-930668.5737	-754397.3983	-596885.9042	-928256.5643	-999443.052	-879832.5523	-715914.8609	-592579.9259	-840159.811	-888040.3753	-846732.7079	-715118.8224	-773637.7651	-956762.5794	-994108.8916	-903023.8522	-755569.1973	-710333.098	-1066725.64	-1148341.288	-997981.011
9	-531981.5412	-709787.334	-863619.9434	-939061.7581	-772905.3613	-552664.8923	-781623.0569	-986316.8185	-1028713.293	-747269.6768	-515883.7719	-747047.3144	-916816.6614	-946487.8116	-696840.4381	-526357.1316	-744133.0311	-822973.3456	-826961.1697	-667368.4015	-641464.6102	-798697.7735	-933945.2916	-961266.9956	-776098.8639	-627204.252	-854542.8067	-1058053.381	-1096146.52	-811511.2331	-589866.7053	-818454.9096	-986186.4722	-1012510.675	-760668.783	-594113.153	-808585.3132	-885623.5541	-887962.8079	-726100.9475	-750947.6792	-887608.213	-1004270.577	-983472.1706	-779292.3692	-701743.5507	-927462.4942	-1129789.955	-1163579.768
10	-528795.9733	-768430.5794	-874682.4749	-838025.4098	-720656.7291	-560612.2911	-881134.8097	-958805.3907	-850552.1388	-690693.2607	-524007.8228	-825547.8262	-891222.5702	-803811.6286	-653254.8306	-527617.2607	-768105.0439	-815340.3327	-784242.184	-658351.6928	-648288.1865	-849464.1546	-921121.9882	-866905.2205	-737377.5173	-635904.5254	-953134.0881	-1027422.712	-917994.9951	-756224.7544	-598372.5725	-895851.962	-958723.855	-870793.0349	-718249.9868	-595384.481	-832042.401	-877591.1038	-845885.1301	-717441.8956	-767780.3997	-930497.7332	-967561.4324	-895784.9722	-754098.3057	-711196.6972	-1025133.311	-1096040.019	-985437.8515
11	-533675.6499	-717924.9539	-808943.6321	-839422.2847	-733530.4171	-563025.9579	-780725.3345	-869332.1241	-874204.2282	-709455.0854	-525713.1423	-745627.6311	-822481.8688	-824862.4269	-669566.0303	-533050.0965	-747052.6976	-798047.4605	-794236.3029	-665461.5571	-643100.02	-794327.7979	-868662.4442	-872560.9465	-745799.6954	-636653.5948	-851661.7918	-938977.4667	-941884.8324	-774252.3117	-598856.2656	-815621.6286	-890979.7651	-891717.3962	-733800.9392	-600214.8436	-810865.5665	-860467.9748	-855481.3881	-724018.4002	-752524.3901	-870730.642	-928381.1939	-905699.5458	-758068.9743	-710281.1695	-922598.1866	-1008622.812	-1009565.442
12	-533593.8754	-723646.9306	-789413.1494	-833034.7356	-763366.1527	-562729.6198	-778074.4143	-828698.1544	-872837.8487	-770773.0967	-525937.1795	-743409.2004	-790823.1226	-825830.196	-719580.5967	-534069.1057	-748018.0033	-790162.1413	-796070.2342	-680852.161	-641727.8016	-793629.6605	-848529.6013	-872268.0624	-777465.1358	-636235.518	-848524.0557	-898334.7639	-941463.4341	-836080.9487	-598932.0086	-813043.7157	-859449.8103	-893203.4909	-783708.7719	-601054.7275	-811595.749	-852539.2819	-857240.4738	-739065.9973	-749861.7279	-863612.3906	-907645.9907	-911501.3248	-791564.1188	-709741.3535	-918973.6345	-967971.3733	-1010089.019
13	-531898.6066	-741552.3245	-826388.8821	-818497.8171	-719902.134	-564088.764	-824216.6914	-884396.047	-832411.4413	-693583.8427	-526975.6385	-780100.4795	-833146.2967	-790906.2167	-656909.9035	-532051.7357	-756805.0206	-800486.7344	-783216.5025	-661980.2162	-645690.1469	-817419.0176	-878168.9765	-852013.4044	-735958.2405	-638254.5353	-895211.0354	-953167.8302	-900039.0753	-758813.7515	-600478.8836	-849941.1376	-901032.9171	-857985.8511	-721558.3919	-599357.9732	-820541.6584	-862786.5812	-844684.2823	-720733.2245	-759481.6872	-893285.7121	-929949.0054	-885528.9306	-752014.3471	-712420.244	-966205.3198	-1021939.608	-967666.7093
14	-531751.8652	-708684.0896	-871032.594	-952570.2151	-778243.5544	-551260.2079	-781744.7641	-1002176.825	-1049660.605	-752396.3276	-514551.1712	-747239.7856	-929605.9451	-962976.9723	-700538.1209	-525449.7439	-743737.2021	-826352.6313	-831397.7895	-667626.9188	-641242.8922	-799290.2257	-942795.9059	-973293.1717	-780206.6237	-625923.173	-854933.3956	-1074196.902	-1117060.293	-816562.5498	-588647.9605	-818839.0269	-999093.9643	-1028887.024	-764311.3466	-593285.9263	-808276.1716	-889033.9802	-892366.4227	-726383.2854	-750733.9193	-889896.3618	-1014559.155	-994016.0657	-782169.6959	-700586.0771	-928121.9647	-1146216.99	-1184460.006
15	-532515.2988	-712351.2291	-846393.2447	-907668.653	-760499.6177	-555929.3216	-781340.2142	-949458.8076	-980032.5934	-735355.5488	-518980.6816	-746600.0191	-887094.886	-908167.6726	-688247.1736	-528465.8636	-745052.9215	-815120.023	-816650.6457	-666767.6178	-641979.8738	-797320.9386	-913376.824	-933318.6512	-766552.5973	-630181.4276	-853635.0942	-1020536.496	-1047543.76	-799772.1783	-592699.0187	-817562.2364	-956189.9853	-974452.7048	-752203.6134	-596035.594	-809303.7456	-877697.8624	-877728.986	-725444.8057	-751444.4487	-882290.6482	-980360.3408	-958968.5868	-772605.5789	-704433.4722	-925929.9116	-1091614.193	-1115054.944
16	-531844.7248	-709130.1393	-868035.6053	-947108.6474	-776085.284	-551828.132	-781695.557	-995764.5088	-1041191.454	-750323.5853	-515089.9514	-747161.9681	-924435.1444	-956310.2844	-699043.1208	-525816.6074	-743897.2387	-824986.3614	-829604.0317	-667522.3983	-641332.5344	-799050.6929	-939217.538	-968430.901	-778545.8264	-626441.1226	-854775.4777	-1067669.959	-1108604.702	-814520.2656	-589140.7079	-818683.7255	-993875.3712	-1022265.947	-762838.6316	-593620.3801	-808401.1598	-887655.12	-890586.0091	-726269.1342	-750820.344	-888971.2466	-1010399.408	-989753.092	-781006.3717	-701054.0521	-927855.3359	-1139575.42	-1176017.973
17	-533454.822	-724205.726	-789453.3657	-838966.8489	-772202.3603	-561920.0618	-777607.5838	-829015.5508	-883749.6785	-785812.2561	-525270.5112	-743066.9234	-791301.3332	-834829.6277	-731589.005	-533788.9887	-748000.2868	-790384.7555	-798807.3274	-684077.845	-641334.1113	-793805.9734	-849216.8517	-878631.332	-786011.3589	-635467.5428	-848103.1449	-898801.8058	-952546.935	-851182.3203	-598296.3892	-812731.6598	-860016.9825	-902246.6663	-795666.3336	-600781.4811	-811577.154	-852769.8236	-859944.9268	-742235.5882	-749213.4008	-863406.221	-908980.2752	-918295.7505	-799820.3575	-709014.961	-918598.6434	-968588.0606	-1021344.191
18	-532734.2224	-713402.8245	-839327.621	-894792.6011	-755411.3349	-557268.245	-781224.2048	-934341.2949	-960065.9408	-730468.9047	-520250.8959	-746416.5585	-874904.3389	-892450.4601	-684722.5996	-529330.7715	-745430.2195	-811898.9402	-812421.7285	-666521.2032	-642191.2119	-796756.2223	-904940.5557	-921855.4865	-762637.1443	-631402.5323	-853262.7909	-1005148.743	-1027609.076	-794957.3415	-593860.7073	-817196.1016	-943886.7639	-958843.0225	-748731.5783	-596824.0936	-809598.4146	-874447.0971	-873531.5285	-725175.6856	-751648.2014	-880109.6202	-970553.4278	-948918.3094	-769862.9556	-705536.7581	-925301.3146	-1075956.197	-1095152.225
19	-528786.1146	-768515.9858	-874835.9292	-838087.4593	-720659.1268	-560601.2445	-881315.6687	-959041.8286	-850609.7814	-690684.0758	-523998.3925	-825692.2364	-891407.1093	-803852.6359	-653243.2165	-527603.1701	-768140.9501	-815387.5304	-784245.4431	-658340.163	-648296.4418	-849565.979	-921258.4727	-866952.5397	-737382.0271	-635897.0582	-953318.1403	-1027658.659	-918052.0506	-756216.5277	-598365.8797	-895997.845	-958907.1697	-870833.7301	-718239.4742	-595371.8551	-832078.9449	-877638.1456	-845888.9458	-717431.4373	-767806.7691	-930615.9755	-967680.947	-895817.5611	-754104.9275	-711192.8093	-1025320.556	-1096275.476	-985494.3198
20	-595168.3161	-783632.2226	-810480.1923	-798952.6789	-713016.4584	-673639.9817	-883630.8369	-849747.757	-812784.9299	-688147.3185	-611520.2336	-824199.9339	-803274.143	-773478.1725	-651164.6302	-551497.8813	-764207.8828	-786762.8794	-773893.8713	-657071.1798	-707421.9995	-851986.8241	-863324.7709	-839966.1279	-731489.8533	-747815.6292	-953817.9938	-918611.436	-881212.0627	-753737.29	-684616.1964	-893408.4321	-871614.2883	-841413.3263	-716246.9792	-618838.6341	-828112.9858	-849714.5982	-836068.5371	-716283.044	-819675.6883	-920341.4256	-916169.2883	-880979.5144	-749963.2483	-821991.2143	-1024005.088	-987475.115	-949639.1956
21	-655333.1252	-845664.1403	-831497.4017	-794492.9071	-706785.8673	-779257.2227	-985645.4002	-872113.101	-807189.6814	-680575.8066	-692812.1066	-902353.8153	-817934.2601	-766072.848	-642706.4272	-567341.7024	-780119.9552	-784500.2051	-765461.2301	-649459.5692	-770403.7574	-910525.6922	-881331.1649	-839389.3744	-728153.749	-854299.5712	-1055799.359	-940950.0894	-876266.337	-746751.03	-766160.958	-971290.1776	-886429.4542	-834778.727	-708481.2535	-635067.2504	-844344.235	-848058.7906	-828467.7179	-709381.4052	-885474.4	-975387.2442	-931164.8682	-884285.7793	-749521.6308	-929341.8572	-1125953.256	-1009787.078	-945342.9925
22	-532845.549	-726654.1309	-789629.5764	-864958.8562	-810918.8787	-558372.9215	-775562.1299	-830406.2473	-931560.6947	-851707.4825	-522349.4531	-741567.2102	-793396.6491	-874261.325	-784204.7637	-532561.6347	-747922.6609	-791360.1566	-810800.1101	-698211.4258	-639609.1273	-794578.5018	-852228.0918	-906512.4839	-823457.2885	-632102.6006	-846258.8919	-900848.1854	-1001110.141	-917350.1337	-595511.3746	-811364.363	-862502.0908	-941870.0302	-848059.3038	-599584.2309	-811495.6786	-853779.9599	-871794.6941	-756123.3929	-746372.706	-862502.8729	-914826.5446	-948066.0455	-835995.6983	-705832.2167	-916955.5915	-971290.1233	-1070659.587
23	-669898.2931	-860681.3125	-836585.4122	-793413.2506	-705277.5171	-804825.8711	-1010341.884	-877527.4785	-805835.1399	-678742.8358	-712491.8795	-921273.9186	-821483.296	-764280.1091	-640658.7992	-571177.2986	-783972.0742	-783952.4392	-763419.7903	-647616.891	-785650.8743	-924697.2396	-885690.2937	-839249.7494	-727346.1187	-880078.0373	-1080487.807	-946358.0054	-875069.037	-745059.7414	-785901.9522	-990144.4002	-890016.0255	-833172.5713	-706601.2659	-638996.0009	-848273.6228	-847657.9397	-826627.6521	-707710.6024	-901403.4672	-988713.1668	-934795.1156	-885086.1857	-749414.7206	-955330.1411	-1150633.666	-1015188.532	-944302.934
24	-532721.9879	-713344.0562	-839722.4829	-895512.1783	-755695.6932	-557193.4193	-781230.688	-935186.136	-961181.7757	-730741.9945	-520179.9101	-746426.8112	-875585.6067	-893328.8154	-684919.5702	-529282.4362	-745409.1343	-812078.9502	-812658.0612	-666534.974	-642179.4013	-796787.7815	-905412.0159	-922496.1046	-762855.9591	-631334.291	-853283.5971	-1006008.686	-1028723.124	-795226.4183	-593795.7864	-817216.5631	-944574.3285	-959715.3684	-748925.6127	-596780.0284	-809581.947	-874628.7659	-873766.1031	-725190.7253	-751636.8147	-880231.5067	-971101.4864	-949479.9684	-770016.2269	-705475.101	-925336.4437	-1076831.243	-1096264.487
25	-653308.3337	-843576.513	-830790.0868	-794642.9966	-706995.5522	-775702.7714	-982212.1937	-871360.4158	-807377.9844	-680830.6189	-690076.3032	-899723.6181	-817440.8873	-766322.0674	-642991.0803	-566808.4931	-779584.449	-784576.3534	-765745.0229	-649715.731	-768284.1641	-908555.6203	-880725.1762	-839408.7845	-728266.0225	-850715.9518	-1052367.27	-940198.3025	-876432.7808	-746986.1461	-763416.6439	-968669.1389	-885930.8634	-835002.0084	-708742.6019	-634521.0912	-843797.9872	-848114.5153	-828723.5165	-709613.6735	-883260.0048	-973534.7276	-930660.2057	-884174.5099	-749536.4931	-925729.0698	-1122522.284	-1009036.189	-945487.5773
26	-527062.0775	-783451.3985	-901671.1809	-848938.3369	-721078.4319	-558669.4763	-912943.3018	-1000388.793	-860690.0043	-689077.869	-522349.2693	-850945.9175	-923678.2934	-811023.7731	-651212.2058	-525139.0698	-774420.0226	-823641.2143	-784815.3825	-656323.9051	-649740.0919	-867372.4678	-945126.1292	-875227.4601	-738170.6751	-634591.2305	-985504.1843	-1068919.794	-928029.5983	-754777.9023	-597195.468	-921509.0662	-990964.2348	-877950.2849	-716401.0961	-593163.9087	-838469.5509	-885864.5597	-846556.2197	-715602.5479	-772418.1062	-951293.5415	-988581.0062	-901516.5253	-755262.9187	-710512.9222	-1058065.013	-1137450.776	-995369.1923
27	-527214.7663	-782128.6488	-899294.5261	-847977.3326	-721041.2963	-558840.5627	-910142.2113	-996726.9136	-859797.2528	-689220.1221	-522495.3233	-848709.3339	-920820.207	-810388.6638	-651392.0816	-525357.302	-773863.9187	-822910.2296	-784764.906	-656502.4743	-649612.2355	-865795.4422	-943012.2984	-874494.5947	-738100.8288	-634706.8807	-982653.6383	-1065265.515	-927145.9402	-754905.3137	-597299.1251	-919249.6737	-988125.1118	-877320.0097	-716563.9114	-593359.4547	-837903.5691	-885135.9902	-846497.1228	-715764.5228	-772009.7047	-949462.24	-986729.9997	-901011.7985	-755160.3616	-710573.1362	-1055165.011	-1133804.1	-994494.6276
28	-651797.1788	-842018.4621	-830262.1991	-794755.0123	-707152.0455	-773049.9912	-979649.9017	-870798.6672	-807518.5198	-681020.792	-688034.5014	-897760.633	-817072.6702	-766508.0664	-643203.5243	-566410.5451	-779184.7867	-784633.1848	-765956.8249	-649906.9112	-766702.2561	-907085.304	-880272.911	-839423.2708	-728349.8152	-848041.4027	-1049805.812	-939637.2242	-876557.0023	-747161.6195	-761368.4903	-966712.989	-885558.752	-835168.6491	-708937.653	-634113.4783	-843390.3081	-848156.1041	-828914.4257	-709787.0214	-881607.3435	-972152.146	-930283.5629	-884091.4667	-749547.5851	-923032.7518	-1119961.659	-1008475.781	-945595.4847
29	-611525.5926	-800497.1184	-816194.2353	-797740.1807	-711322.5197	-702354.6148	-911365.9939	-855828.3234	-811263.7246	-686088.8176	-633621.4198	-845447.9802	-807259.8548	-771464.8537	-648865.0606	-555805.412	-768533.9693	-786147.716	-771601.2513	-655001.7771	-724545.1326	-867902.0488	-868220.25	-839809.3233	-730582.8516	-776765.8962	-981544.1251	-924684.7459	-879867.4461	-751837.9042	-706786.1366	-914582.4917	-875642.1539	-839609.548	-714135.6765	-623250.7808	-832525.8483	-849264.4264	-834002.0683	-714406.6645	-837564.6792	-935306.9792	-920246.2039	-881878.4035	-749843.1838	-851177.1151	-1051722.194	-993541.1684	-948471.1676
30	-527624.4248	-778579.7578	-892918.0447	-845398.992	-720941.6628	-559299.5815	-902626.9841	-986902.219	-857402.032	-689601.7823	-522887.1811	-842708.6588	-913152.0619	-808684.6879	-651874.6819	-525942.8113	-772371.9115	-820949.0234	-784629.4794	-656981.5692	-649269.2014	-861564.3381	-937340.9647	-872528.3423	-737913.4335	-635017.1661	-975005.7238	-1055461.215	-924775.1167	-755247.1539	-597577.2335	-913187.8029	-980507.8447	-875629.0034	-717000.7392	-593884.0978	-836385.0597	-883181.2637	-846338.568	-716199.096	-770913.9779	-944548.9224	-981763.8141	-899657.6342	-754885.2045	-710734.6882	-1047384.409	-1124020.195	-992148.2013
31	-528754.872	-768786.6423	-875322.2322	-838284.0967	-720666.7254	-560566.2374	-881888.8182	-959791.11	-850792.4531	-690654.9684	-523968.5074	-826149.8786	-891991.9212	-803982.5898	-653206.4109	-527558.5161	-768254.7382	-815537.102	-784255.7714	-658303.6248	-648322.6034	-849888.6646	-921690.9975	-867102.4962	-737396.3188	-635873.3942	-953901.4093	-1028406.385	-918232.8617	-756190.4573	-598344.6697	-896460.1542	-959488.1014	-870962.6949	-718206.1595	-595331.8431	-832194.7542	-877787.223	-845901.038	-717398.2945	-767890.3348	-930990.6902	-968059.6936	-895920.8365	-754125.9124	-711180.4885	-1025913.945	-1097021.646	-985673.2702
32	-533178.7467	-725315.1534	-789533.2107	-850744.4129	-789745.6868	-560312.7726	-776680.7426	-829645.7067	-905413.9269	-815670.8674	-523946.914	-742387.3696	-792250.768	-852697.0179	-755430.3904	-533232.8469	-747965.1128	-790826.7317	-804241.5273	-690482.0888	-640552.4822	-794156.0234	-850581.3125	-891264.9099	-802978.953	-633942.8117	-847267.4723	-899729.0665	-974552.0175	-881164.4469	-597034.4364	-812112.1068	-861143.0411	-920200.905	-819406.7685	-600238.98	-811540.2357	-853227.5391	-865314.3233	-748528.4653	-747926.218	-862996.8936	-911629.3515	-931785.3417	-816212.2192	-707572.7879	-917854.1396	-969812.4261	-1043690.108
33	-585377.4395	-773537.5035	-807059.972	-799678.4366	-714030.3891	-656452.4366	-867029.571	-846108.1489	-813695.4686	-689379.463	-598291.2597	-811481.6188	-800888.4395	-774683.2726	-652541.0697	-548919.5486	-761618.4433	-787131.094	-775266.1511	-658309.8497	-697172.7089	-842460.5439	-860394.5135	-840059.9855	-732032.7518	-730487.0422	-937222.1303	-914976.1714	-882016.9018	-754874.194	-671346.0688	-880734.4028	-869203.353	-842493.003	-717510.729	-616197.682	-825471.6052	-849984.0549	-837305.4509	-717406.1772	-808967.9827	-911383.5843	-913728.9935	-880441.4718	-750035.1146	-804521.5853	-1007414.627	-983844.1939	-950338.3351
34	-532439.3243	-711986.2868	-848845.2759	-912137.1164	-762265.439	-555464.666	-781380.4738	-954705.1402	-986961.7559	-737051.394	-518539.8706	-746663.6867	-891325.454	-913622.1231	-689470.3303	-528165.7088	-744921.9852	-816237.8571	-818118.2354	-666853.1328	-641906.5317	-797516.9159	-916304.5193	-937296.7908	-767911.4034	-629757.6594	-853764.2971	-1025876.612	-1054461.829	-801443.1037	-592295.87	-817689.2986	-960459.6555	-979869.8385	-753408.5373	-595761.9557	-809201.4847	-878825.9975	-879185.658	-725538.2003	-751373.7391	-883047.5451	-983763.7001	-962456.4026	-773557.37	-704050.5914	-926148.0579	-1097048.093	-1121961.919
35	-533145.4008	-715377.9122	-826057.0934	-870609.0314	-745854.6133	-559782.9868	-781006.3179	-905947.8539	-922564.9323	-721290.8975	-522636.5897	-746071.9862	-852008.2722	-862930.6738	-678102.8081	-530955.2259	-746138.8539	-805849.1603	-804479.052	-666058.3916	-642588.1435	-795695.5824	-889095.7079	-900325.5762	-755283.2109	-633695.9892	-852563.5377	-976247.7399	-990168.1082	-785914.2013	-596042.5701	-816508.4339	-920779.0742	-929525.1973	-742210.4642	-598305.0394	-810151.8565	-868341.568	-865647.9393	-724670.229	-752030.8861	-876013.2525	-952134.2599	-930042.0586	-764711.8099	-707608.9298	-924120.695	-1046547.631	-1057771.295
36	-582420.012	-770488.2975	-806026.8619	-799897.6587	-714336.6565	-651260.775	-862015.0006	-845008.7707	-813970.5054	-689751.6439	-594295.3221	-807639.9306	-800167.815	-775047.2846	-652956.8364	-548140.7386	-760836.2784	-787242.3168	-775680.6612	-658684.0017	-694076.8131	-839583.0403	-859509.4013	-840088.336	-732196.7395	-725252.7775	-932209.1917	-913878.1052	-882260.0111	-755217.6067	-667337.7004	-876906.0916	-868475.1071	-842819.1296	-717892.4566	-615399.9572	-824673.7511	-850065.4468	-837679.0725	-717745.4303	-805733.6182	-908677.783	-912991.8792	-880278.9509	-750056.8225	-799244.7176	-1002403.32	-982747.4396	-950549.5168
37	-585137.4645	-773290.0814	-806976.1422	-799696.225	-714055.2406	-656031.1688	-866622.673	-846018.9419	-813717.7859	-689409.6629	-597967.0167	-811169.8921	-800829.9657	-774712.8097	-652574.8063	-548856.3535	-761554.976	-787140.119	-775299.7857	-658340.2096	-696921.4981	-842227.0542	-860322.6927	-840062.2859	-732046.0583	-730062.3175	-936815.3646	-914887.0709	-882036.6285	-754902.0596	-671020.8172	-880423.7616	-869144.2608	-842519.466	-717541.7035	-616132.9521	-825406.8648	-849990.6593	-837335.7677	-717433.7053	-808705.5361	-911164.027	-913669.1817	-880428.2843	-750036.876	-804093.4036	-1007007.994	-983755.1998	-950355.4711
38	-533751.3815	-723013.9816	-789367.5963	-826315.4167	-753357.3592	-563646.6082	-778603.1945	-828338.6388	-860477.9928	-753738.2045	-526692.3163	-743796.8985	-790281.4524	-815636.5181	-705978.6437	-534386.3949	-748038.0707	-789909.9857	-792969.9222	-677198.421	-642173.7355	-793429.9505	-847751.1512	-865060.3716	-767784.8083	-637105.4055	-849000.8224	-897805.7444	-928909.1259	-818975.5888	-599651.9761	-813397.1822	-858807.373	-882960.2643	-770164.413	-601364.2344	-811616.8116	-852278.1467	-854177.1334	-735475.794	-750596.0896	-863845.9195	-906134.6435	-903805.2626	-782212.2574	-710564.1401	-919398.3878	-967272.85	-997340.2591
39	-658403.2587	-848829.55	-832569.8831	-794265.3306	-706467.9282	-784646.736	-990851.0734	-873254.376	-806904.163	-680189.442	-696960.3273	-906341.9083	-818682.3472	-765694.9638	-642274.8159	-568150.1924	-780931.9279	-784384.7438	-765030.9231	-649071.1584	-773617.6363	-913512.8561	-882250.0082	-839359.9434	-727983.5118	-859733.3111	-1061003.338	-942090.0024	-876013.9629	-746394.53	-770322.0833	-975264.3838	-887185.4532	-834440.1719	-708084.9784	-635895.376	-845172.495	-847974.2968	-828079.8578	-709029.2233	-888832.0245	-978196.1621	-931930.0736	-884454.4937	-749499.0956	-934819.8237	-1131155.541	-1010925.629	-945123.7627
40	-532777.5084	-713610.7479	-837930.5927	-892246.7241	-754405.2701	-557532.9794	-781201.2672	-931352.2321	-956118.097	-729502.7083	-520502.0451	-746380.2843	-872494.0012	-889342.8235	-684025.7143	-529501.7827	-745504.8196	-811262.0617	-811585.5791	-666472.4816	-642232.9981	-796644.5656	-903272.5209	-919588.9681	-761862.9737	-631643.9714	-853189.1784	-1002106.247	-1023667.552	-794005.3429	-594090.3986	-817123.7088	-941454.148	-955756.6469	-748045.081	-596979.9972	-809656.6771	-873804.3497	-872701.5994	-725122.4746	-751688.4878	-879678.3832	-968614.3867	-946931.1497	-769320.6791	-705754.9018	-925177.0272	-1072860.269	-1091217.022
41	-533611.8032	-717618.2673	-811004.2456	-843177.4473	-735014.3603	-562635.4752	-780759.1674	-873740.9848	-880027.2885	-710880.2228	-525342.6979	-745681.1354	-826037.1113	-829446.1836	-670593.9345	-532797.8554	-746942.6626	-798986.8548	-795469.6213	-665533.4213	-643038.3855	-794492.4914	-871122.7915	-875904.0557	-746941.5953	-636297.4727	-851770.3701	-943465.1402	-947698.5696	-775656.5073	-598517.4716	-815728.4079	-894567.8678	-896269.7929	-734813.5211	-599984.8861	-810779.6294	-861416.0257	-856705.5315	-724096.8862	-752464.9678	-871366.7154	-931241.275	-908630.6016	-758868.831	-709959.408	-922781.5102	-1013189.299	-1015369.857
42	-668670.2733	-859415.1832	-836156.4314	-793504.2787	-705404.6893	-802670.1248	-1008259.672	-877070.981	-805949.3441	-678897.3774	-710832.6366	-919678.7251	-821184.0693	-764431.2587	-640831.4391	-570853.9115	-783647.294	-783998.6225	-763591.9083	-647772.251	-784365.358	-923502.4068	-885322.7664	-839261.5215	-727414.2117	-877904.6009	-1078406.272	-945902.0527	-875169.9838	-745202.3375	-784237.5476	-988554.7612	-889713.6342	-833307.9897	-706759.7716	-638664.7597	-847942.3279	-847691.7363	-826782.7919	-707851.4713	-900060.4542	-987589.6303	-934489.0418	-885018.7018	-749423.7344	-953139.0144	-1148552.809	-1014733.124	-944390.6236
43	-533497.9208	-717071.2351	-814679.7308	-849875.4744	-737661.2475	-561938.9772	-780819.5147	-881605.0032	-890413.7937	-713422.2189	-524681.9418	-745776.5703	-832378.5438	-837622.1614	-672427.3918	-532347.9367	-746746.395	-800662.4382	-797669.4728	-665661.6044	-642928.449	-794786.2526	-875511.276	-881867.1093	-748978.385	-635662.263	-851964.0394	-951469.7359	-958068.4454	-778161.1498	-597913.1697	-815918.8685	-900967.9127	-904389.8343	-736619.6481	-599574.7145	-810626.3448	-863107.0498	-858889.0179	-724236.8805	-752358.9772	-872501.2701	-936342.7587	-913858.6817	-760295.5233	-709385.4868	-923108.5018	-1021334.472	-1025723.105
44	-533390.177	-716553.69	-818157.094	-856212.4534	-740165.4578	-561280.0229	-780876.609	-889045.1224	-900240.4284	-715827.1922	-524056.8029	-745866.8608	-838378.15	-845357.4242	-674162.0191	-531922.2703	-746560.7069	-802247.7016	-799750.7443	-665782.8779	-642824.4384	-795064.179	-879663.2052	-887508.7326	-750905.3843	-635061.2935	-852147.2694	-959042.8548	-967879.3472	-780530.783	-597341.4419	-816099.0626	-907022.9719	-912072.176	-738328.4183	-599186.6525	-810481.3228	-864706.9216	-860954.8064	-724369.3286	-752258.6998	-873574.6681	-941169.2538	-918804.9492	-761645.3118	-708842.5021	-923417.8673	-1029040.591	-1035518.274
45	-532586.0668	-727696.8775	-789704.6225	-876028.5441	-827407.785	-556862.2365	-774690.9954	-830998.5284	-951922.8398	-879771.4783	-521105.4091	-740928.5002	-794289.0194	-891054.8175	-806613.1916	-532038.9192	-747889.601	-791775.5684	-815907.6941	-704230.7504	-638874.4771	-794907.5125	-853510.5433	-918386.7361	-839405.066	-630669.5115	-845473.4465	-901719.7143	-1021792.635	-945530.2211	-594325.2699	-810782.0475	-863560.469	-958745.1512	-870372.8488	-599074.3362	-811460.9792	-854210.1649	-876841.3696	-762038.0443	-745162.8877	-862118.1477	-917316.4014	-960744.8612	-851402.3471	-704476.7236	-916255.8351	-972440.8998	-1091662.43
46	-533093.5099	-715128.6552	-827731.8402	-873661.0092	-747060.676	-559465.6252	-781033.8153	-909531.1195	-927297.5771	-722449.1663	-522335.514	-746115.4713	-854897.7665	-866656.0846	-678938.2289	-530750.219	-746049.4239	-806612.6454	-805481.4215	-666116.7986	-642538.0505	-795829.4356	-891095.3351	-903042.661	-756211.2808	-633406.5539	-852651.7838	-979895.06	-994893.1758	-787055.4499	-595767.218	-816595.2179	-923695.2754	-933225.1205	-743033.4318	-598118.1434	-810082.0119	-869112.0886	-866642.852	-724734.0178	-751982.5911	-876530.216	-954458.7675	-932424.2502	-765361.8869	-707347.4207	-924269.6897	-1050259.006	-1062488.786
47	-531125.6886	-748248.1483	-838419.6255	-823362.4678	-720090.1163	-563222.7163	-838395.9486	-902932.6617	-836930.5931	-692863.7503	-526236.3059	-791422.1753	-847614.0698	-794121.1711	-655999.3636	-530947.0337	-759620.0458	-804187.0147	-783472.017	-661076.2902	-646337.3621	-825401.9983	-888869.2916	-855723.2054	-736311.8061	-637669.1084	-909640.6386	-971665.9657	-904512.1959	-758168.7889	-599954.1662	-861378.2934	-915404.6966	-861176.3352	-720734.2127	-598368.1097	-823406.6861	-866474.6359	-844983.4336	-719913.2993	-761549.0356	-902555.8503	-939318.8914	-888083.8824	-752533.4961	-712115.438	-980885.27	-1040399.262	-972093.7987
48	-533169.1011	-725353.9146	-789536.0004	-851155.898	-790358.6164	-560256.6171	-776648.3605	-829667.7231	-906170.8335	-816714.069	-523900.6701	-742363.6273	-792283.9394	-853321.2697	-756263.3619	-533213.4164	-747963.8839	-790842.1735	-804431.3877	-690705.8406	-640525.1736	-794168.2535	-850628.984	-891706.3025	-803571.7677	-633889.5405	-847238.2756	-899761.4632	-975320.8321	-882211.9639	-596990.3462	-812090.4608	-861182.3833	-920828.191	-820236.213	-600220.0261	-811538.9458	-853243.5308	-865501.9195	-748748.3261	-747881.2463	-862982.5925	-911721.9051	-932256.6417	-816784.9189	-707522.4011	-917828.1281	-969855.203	-1044470.831
49	-573489.6399	-761280.7871	-802907.2392	-800559.6307	-715261.4745	-635583.8156	-846872.7932	-841689.042	-814801.0183	-690875.4972	-582229.0214	-796039.4077	-797991.7871	-776146.4704	-654212.3028	-545789.0114	-758474.4206	-787578.1696	-776932.3335	-659813.8069	-684728.3161	-830894.0095	-856836.6794	-840173.9446	-732691.9235	-709447.1722	-917071.912	-910562.3382	-882994.1142	-756254.59	-655233.863	-865345.9623	-866276.065	-843803.9153	-719045.1374	-612991.1142	-822264.5172	-850311.2214	-838807.2759	-718769.8531	-795966.9957	-900507.2319	-910766.058	-879788.196	-750122.3726	-783310.4662	-987270.9682	-979435.6344	-951187.2101
50	-525453.3933	-797387.504	-926710.9243	-859063.1978	-721469.6819	-556866.96	-942454.7752	-1038969.292	-870095.774	-687579.1312	-520810.4866	-874509.9109	-953790.2587	-817715.0997	-649317.0872	-522839.8391	-780278.9713	-831342.656	-785347.188	-654442.5521	-651087.1493	-883987.5499	-967396.835	-882948.7174	-738906.5559	-633372.774	-1015536.706	-1107420.205	-937339.5626	-753435.5333	-596103.3668	-945313.3682	-1020876.407	-884590.6813	-714685.7212	-591103.6928	-844432.5705	-893540.5562	-847178.8472	-713896.0268	-776720.9054	-970587.6012	-1008082.672	-906834.18	-756343.4303	-709878.5255	-1088618.585	-1175871.096	-1004583.351
51	-579036.3106	-766999.5889	-804844.8426	-800148.4787	-714687.0684	-645320.8042	-856277.6463	-843750.9316	-814285.1852	-690177.4699	-589723.4232	-803244.514	-799343.3221	-775463.764	-653432.5303	-547249.6735	-759941.3749	-787369.5708	-776154.9176	-659112.0828	-690534.6849	-836290.7826	-858496.7119	-840120.773	-732384.3638	-719264.0629	-926473.7045	-912621.7672	-882538.1614	-755610.5177	-662751.5789	-872525.9801	-867641.8941	-843192.2631	-718329.2052	-614487.2511	-823760.8968	-850158.5704	-838106.5467	-718133.5822	-802033.063	-905581.9763	-912148.5197	-880093.0048	-750081.6593	-793207.2593	-996669.7002	-981492.6028	-950791.1376
52	-668815.8155	-859565.2421	-836207.2733	-793493.4902	-705389.6171	-802925.6192	-1008506.451	-877125.0841	-805935.8089	-678879.0614	-711029.2865	-919867.784	-821219.533	-764413.3448	-640810.9782	-570892.2386	-783685.7862	-783993.149	-763571.5093	-647753.8381	-784517.7146	-923644.0158	-885366.325	-839260.1263	-727406.1415	-878162.1918	-1078652.971	-945956.0912	-875158.0198	-745185.4373	-784434.8093	-988743.1617	-889749.473	-833291.9402	-706740.9858	-638704.0177	-847981.5923	-847687.7308	-826764.4051	-707834.7758	-900219.6252	-987722.7894	-934525.317	-885026.6998	-749422.6661	-953398.702	-1148799.428	-1014787.098	-944380.2308
53	-640688.5852	-830565.1329	-826381.6643	-795578.4471	-708302.4373	-753549.2394	-960814.3341	-866669.2181	-808551.6045	-682418.7662	-673025.0898	-883330.6079	-814365.8839	-767875.3564	-644765.2136	-563485.2043	-776246.8442	-785050.9561	-767513.7946	-651312.2891	-755073.5522	-896276.9178	-876948.2813	-839529.7603	-728965.7803	-828380.6267	-1030976.374	-935512.7032	-877470.1616	-748451.5351	-746312.3864	-952333.21	-882823.3381	-836393.6354	-710371.4861	-631117.0904	-840393.4342	-848461.8259	-830317.8111	-711061.3129	-869458.5283	-961988.7027	-927514.838	-883481.011	-749629.1236	-903211.9515	-1101138.351	-1004356.188	-946388.7187
54	-530219.0319	-756102.5573	-852532.0608	-829068.8539	-720310.6253	-562206.8155	-855028.6573	-924676.6858	-842231.6984	-692019.0595	-525369.0458	-804702.8757	-864585.2166	-797892.4124	-654931.272	-529651.1839	-762922.1577	-808527.5583	-783771.7433	-660015.957	-647096.5656	-834766.2824	-901421.0933	-860074.9171	-736726.5496	-636982.3846	-926567.011	-993364.8527	-909759.3051	-757412.2278	-599338.6564	-874794.4321	-932263.24	-864918.8721	-719767.425	-597206.9691	-826767.4525	-870800.8385	-845334.3474	-718951.5016	-763974.0994	-913430.0099	-950310.0583	-891080.9203	-753142.474	-711757.8911	-998105.3071	-1062053.01	-977286.9119
55	-606094.2011	-794897.1732	-814296.902	-798142.7876	-711884.9877	-692819.9949	-902156.6065	-853809.287	-811768.8369	-686772.3375	-626282.7779	-838392.6212	-805936.4094	-772133.371	-649628.6268	-554375.1075	-767097.5034	-786351.9794	-772362.5099	-655688.9169	-718859.4404	-862617.4394	-866594.7188	-839861.3899	-730884.0192	-767153.0346	-972337.7346	-922668.119	-880313.9226	-752468.5904	-699424.6651	-907551.6998	-874304.7115	-840208.488	-714836.7292	-621785.7389	-831060.5687	-849413.9048	-834688.234	-715029.7115	-831624.6859	-930337.7057	-918892.4746	-881579.9297	-749883.0509	-841486.0119	-1042518.8	-991526.951	-948859.0083
56	-533110.2281	-715208.9607	-827192.2714	-872677.7251	-746672.1075	-559567.8726	-781024.9562	-908376.6654	-925772.8168	-722075.996	-522432.5143	-746101.4613	-853966.8312	-865455.8343	-678669.0736	-530816.268	-746078.2364	-806366.6663	-805158.4788	-666097.9811	-642554.1894	-795786.3109	-890451.0966	-902167.2725	-755912.2759	-633499.804	-852623.3527	-978719.9689	-993370.8567	-786687.7632	-595855.9307	-816567.2579	-922755.7357	-932033.0818	-742768.2887	-598178.3574	-810104.5144	-868863.8428	-866322.3117	-724713.4664	-751998.1507	-876363.6611	-953709.8592	-931656.7573	-765152.4455	-707431.6735	-924221.6867	-1049063.278	-1060968.908
57	-533368.1686	-724553.9486	-789478.4271	-842663.5435	-777708.7893	-561415.5723	-777316.6706	-829213.3416	-890549.5661	-795184.1575	-524855.0658	-742853.6277	-791599.338	-840437.7726	-739072.2436	-533614.4291	-747989.2466	-790523.4812	-800512.9923	-686087.9834	-641088.7767	-793915.8457	-849645.1232	-882596.7088	-791337.0794	-634988.9663	-847840.8473	-899092.8506	-959453.8021	-860592.9901	-597900.2925	-812537.197	-860370.4253	-907882.0708	-803117.8862	-600611.203	-811565.5662	-852913.4895	-861630.2514	-744210.7712	-748809.385	-863277.7429	-909811.7567	-922529.8093	-804965.3694	-708562.2975	-918364.9615	-968972.3595	-1028358.038
58	-532516.5356	-727976.2933	-789724.7319	-878994.7931	-831826.1753	-556457.4312	-774457.565	-831157.2369	-957379.1086	-887291.5457	-520772.0533	-740757.3505	-794528.1402	-895554.8252	-812617.7851	-531898.8516	-747880.7422	-791886.8827	-817276.3294	-705843.697	-638677.6192	-794995.6746	-853854.1908	-921568.5772	-843678.4547	-630285.499	-845262.9774	-901953.2503	-1027334.745	-953081.3966	-594007.4396	-810626.0094	-863844.0735	-963267.0322	-876352.0174	-598937.7041	-811451.6811	-854325.4433	-878193.6838	-763622.9425	-744838.7032	-862015.0562	-917983.5869	-964142.2943	-855530.7341	-704113.5038	-916068.3274	-972749.2635	-1097290.381
59	-525982.526	-792803.603	-918474.7851	-855732.9015	-721340.9909	-557459.8485	-932747.7827	-1026279.291	-867002.0031	-688072.1	-521316.6271	-866759.1794	-943885.7507	-815514.1707	-649940.4347	-523596.1082	-778351.8303	-828809.4772	-785172.2651	-655061.3718	-650644.0716	-878522.4728	-960071.495	-880409.0209	-738664.508	-633773.552	-1005658.329	-1094756.547	-934277.3043	-753877.0689	-596462.5836	-937483.5937	-1011037.616	-882406.5044	-715249.9469	-591781.3445	-842471.1982	-891015.747	-846974.0509	-714457.3403	-775305.6172	-964241.3476	-1001668.132	-905085.0829	-755988.0255	-710087.193	-1078568.823	-1163233.782	-1001552.606
60	-533234.3177	-715805.0225	-823187.3581	-865379.3642	-743787.984	-560326.7967	-780959.2002	-899807.8072	-914455.3852	-719306.1647	-523152.493	-745997.4728	-847057.0259	-856547.0563	-676671.2863	-531306.5122	-746292.0952	-804540.9029	-802761.458	-665958.3091	-642673.9794	-795466.2203	-885669.279	-895669.7596	-753692.9319	-634191.9465	-852412.325	-969997.9336	-982071.545	-783958.6334	-596514.3952	-816359.7267	-915782.0647	-923185.2536	-740800.2813	-598625.2921	-810271.5377	-867021.2548	-863943.1228	-724560.9246	-752113.6412	-875127.418	-948151.1374	-925960.0925	-763597.881	-708057.0344	-923865.3874	-1040188.065	-1049687.715
61	-533654.5365	-723403.1597	-789395.6053	-830446.8894	-759511.414	-563082.7843	-778278.0662	-828559.6923	-868077.6331	-764212.3601	-526228.0093	-743558.5166	-790614.5064	-821904.2519	-714342.0058	-534191.3049	-748025.732	-790065.0273	-794876.1949	-679444.9771	-641899.5464	-793552.7452	-848229.7928	-869492.1269	-773736.9009	-636570.5423	-848707.6753	-898131.0199	-936628.3281	-829493.0725	-599209.2934	-813179.8481	-859202.3851	-889258.4638	-778492.3626	-601173.9295	-811603.861	-852438.7095	-856060.6736	-737683.2836	-750144.5564	-863702.3308	-907063.9177	-908537.3004	-787962.3878	-710058.2376	-919137.2219	-967702.3474	-1005179.023
62	-524593.5727	-804836.1697	-940094.3389	-864474.8032	-721678.7999	-555903.5387	-958228.2708	-1059590.062	-875123.0345	-686778.0755	-519988.0274	-887104.5564	-969884.7093	-821291.5261	-648304.1711	-521610.9303	-783410.5026	-835458.9756	-785631.4311	-653436.9936	-651807.1339	-892868.0934	-979300.2352	-887075.6282	-739299.8745	-632721.5249	-1031588.695	-1127998.17	-942315.6165	-752718.0547	-595519.6531	-958036.4554	-1036864.072	-888139.8861	-713768.8759	-590002.5344	-847619.7264	-897643.2757	-847511.6335	-712983.9137	-779020.6951	-980900.0231	-1018506.057	-909676.3967	-756920.9495	-709539.4487	-1104949.069	-1196406.254	-1009508.198
63	-533464.5532	-716910.9545	-815756.6493	-851837.9986	-738436.7863	-561734.903	-780837.1964	-883909.1632	-893457.0432	-714167.0247	-524488.3401	-745804.5327	-834236.5857	-840017.7257	-672964.5954	-532216.1104	-746688.8885	-801153.3848	-798314.03	-665699.1621	-642896.2375	-794872.3248	-876797.1034	-883614.286	-749575.165	-635476.1464	-852020.7846	-953815.0852	-961106.8226	-778895.0109	-597736.1091	-815974.6735	-902843.1281	-906769.0092	-737148.8439	-599454.534	-810581.4324	-863602.5204	-859528.7801	-724277.8989	-752327.9219	-872833.695	-937837.4951	-915390.5109	-760713.5447	-709217.3277	-923204.3104	-1023721.011	-1028756.61
64	-532820.3238	-713816.411	-836548.7518	-889728.5238	-753410.1424	-557794.8359	-781178.5789	-928395.664	-952213.171	-728547.0156	-520750.4639	-746344.4045	-870109.8667	-886268.9707	-683336.405	-529670.9348	-745578.6087	-810632.1068	-810758.5196	-666424.2897	-642274.33	-796534.1227	-901622.6198	-917347.0896	-761097.2192	-631882.7858	-853116.3662	-999096.8274	-1019768.878	-793063.6938	-594317.5928	-817052.103	-939047.9775	-952703.824	-747366.0468	-597134.206	-809714.3062	-873168.5898	-871880.6926	-725069.8422	-751728.3362	-879251.8344	-966696.4253	-944965.5929	-768784.2977	-705970.6741	-925054.091	-1069797.998	-1087324.6
65	-530973.6131	-749565.5861	-840786.7363	-824319.6128	-720127.1027	-563052.317	-841185.7905	-906579.8361	-837819.7595	-692722.0684	-526090.8384	-793649.7772	-850460.6787	-794753.7299	-655820.2102	-530729.6779	-760173.9165	-804915.0639	-783522.2908	-660898.4381	-646464.705	-826972.6909	-890974.6338	-856453.1279	-736381.372	-637553.9227	-912479.7374	-975305.5692	-905392.3054	-758041.8892	-599850.9253	-863628.6128	-918232.4183	-861804.0794	-720572.0512	-598173.3489	-823970.3951	-867200.2797	-845042.2932	-719751.9748	-761955.797	-904379.7977	-941162.4647	-888586.5824	-752635.6414	-712055.4658	-983773.6259	-1044031.294	-972964.8513
66	-530832.2911	-750789.8643	-842986.4621	-825209.0755	-720161.4738	-562893.9671	-843778.355	-909969.1088	-838646.0505	-692590.4052	-525955.6573	-795719.8593	-853105.996	-795341.5588	-655653.7252	-530527.6919	-760688.6215	-805591.6307	-783569.0095	-660733.1624	-646583.0432	-828432.3155	-892931.1013	-857131.4355	-736446.0187	-637446.882	-915118.0757	-978687.8063	-906210.18	-757923.9629	-599754.9849	-865719.8058	-920860.184	-862387.4341	-720421.3566	-597992.3603	-824494.2426	-867874.6112	-845096.9906	-719602.058	-762333.7953	-906074.7688	-942875.6739	-889053.735	-752730.5636	-711999.7345	-986457.7381	-1047406.495	-973774.3094
67	-533397.5026	-724436.0679	-789469.9433	-841412.1342	-775844.7467	-561586.3527	-777415.1508	-829146.3852	-888247.6604	-792011.5707	-524995.7028	-742925.8328	-791498.457	-838539.297	-736539.0091	-533673.5212	-747992.9839	-790476.5196	-799935.5886	-685407.509	-641171.8276	-793878.6516	-849500.1443	-881254.3449	-789534.2104	-635150.9746	-847929.6406	-898994.3258	-957115.6816	-857407.2794	-598034.3796	-812603.0267	-860250.7774	-905974.3672	-800595.3781	-600668.8457	-811569.489	-852864.8556	-861059.7334	-743542.13	-748946.1529	-863321.2355	-909530.2826	-921096.4909	-803223.6741	-708715.5337	-918444.0678	-968842.2662	-1025983.703
68	-533251.0508	-715885.4	-822647.3053	-864395.1979	-743399.0669	-560429.1357	-780950.3331	-898652.3175	-912929.2571	-718932.6597	-523249.5804	-745983.4502	-846125.2554	-855345.7292	-676401.8896	-531372.6204	-746320.9336	-804294.7031	-802438.2256	-665939.4747	-642690.1328	-795423.0568	-885024.4625	-894793.5858	-753393.6587	-634285.2802	-852383.8684	-968821.7883	-980547.8603	-783590.6169	-596603.1876	-816331.7416	-914841.6821	-921992.1454	-740534.9003	-598685.5602	-810294.0604	-866772.7863	-863622.295	-724540.3547	-752129.2148	-874960.7137	-947401.5573	-925191.9111	-763388.2517	-708141.3628	-923817.3413	-1038991.264	-1048166.473
69	-532496.1911	-728058.049	-789730.6159	-879862.7024	-833118.9738	-556338.9872	-774389.2644	-831203.6742	-958975.585	-889491.8791	-520674.5151	-740707.273	-794598.1057	-896871.5045	-814374.6987	-531857.8685	-747878.1502	-791919.4527	-817676.7852	-706315.637	-638620.0196	-795021.4704	-853954.7403	-922499.5677	-844928.8265	-630173.1389	-845201.3953	-902021.5818	-1028956.338	-955290.8321	-593914.4441	-810580.3535	-863927.0547	-964590.1115	-878101.4917	-598897.7263	-811448.9606	-854359.1731	-878589.364	-764086.6757	-744743.8484	-861984.8921	-918178.802	-965136.366	-856738.6792	-704007.2275	-916013.4636	-972839.4892	-1098937.09
70	-532346.2444	-711539.179	-851849.3734	-917611.639	-764428.8288	-554895.3947	-781429.7976	-961132.6666	-995450.9955	-739129.0528	-517999.8124	-746741.6888	-896508.5198	-920304.6244	-690968.8766	-527797.9751	-744761.5691	-817607.3678	-819916.248	-666957.9011	-641816.6769	-797757.0168	-919891.375	-942170.5948	-769576.14	-629238.4812	-853922.5896	-1032419.037	-1062937.477	-803490.2322	-591801.9538	-817844.9684	-965690.6272	-986506.6211	-754884.7455	-595426.7086	-809076.2	-880208.1283	-880970.2948	-725652.6223	-751287.1093	-883974.8547	-987933.3141	-966729.4881	-774723.4535	-703581.5064	-926415.3191	-1103705.417	-1130423.976
71	-531753.0587	-708689.8229	-870994.0719	-952500.0144	-778215.8129	-551267.5078	-781744.1316	-1002094.404	-1049551.746	-752369.6855	-514558.0965	-747238.7854	-929539.4818	-962891.2815	-700518.9048	-525454.4594	-743739.2592	-826335.0698	-831374.7333	-667625.5753	-641244.0444	-799287.1468	-942749.911	-973230.6741	-780185.2765	-625929.8305	-854931.3658	-1074113.007	-1116951.609	-816536.2991	-588654.2941	-818837.0308	-999026.8867	-1028801.919	-764292.4169	-593290.2253	-808277.7781	-889016.2569	-892343.538	-726381.8182	-750735.0301	-889884.4708	-1014505.688	-993961.2712	-782154.743	-700592.0922	-928118.5375	-1146131.622	-1184351.495
72	-526569.5488	-787718.1974	-909337.566	-852038.2521	-721198.2204	-558117.6023	-921978.7906	-1012200.933	-863569.7564	-688619.0024	-521878.1422	-858160.4742	-932897.6339	-813072.4477	-650631.9799	-524435.1174	-776213.8492	-825999.1545	-784978.2047	-655747.8938	-650152.5187	-872459.4855	-951944.7217	-877591.4673	-738395.9788	-634218.1773	-994699.2017	-1080707.414	-930880.0178	-754366.911	-596861.1008	-928797.1978	-1000122.405	-879983.3663	-715875.902	-592533.1351	-840295.2407	-888214.7094	-846746.8487	-715080.0646	-773735.4885	-957200.7782	-994551.8055	-903144.6246	-755593.7375	-710318.6898	-1067419.56	-1149213.875	-998190.2792
73	-533361.2188	-716414.59	-819091.7006	-857915.6353	-740838.5113	-561102.9166	-780891.9542	-891044.7938	-902881.5207	-716473.5739	-523888.7851	-745891.1281	-839990.6566	-847436.4211	-674628.2327	-531807.8644	-746510.7997	-802673.7709	-800310.125	-665815.4725	-642796.4836	-795138.877	-880779.114	-889025.0246	-751423.3014	-634899.7717	-852196.5158	-961078.2725	-970516.2109	-781167.6663	-597187.7794	-816147.4931	-908650.3826	-914136.9493	-738787.6823	-599082.3536	-810442.3454	-865136.9171	-861510.0258	-724404.9265	-752231.7484	-873863.1639	-942466.4648	-920134.3513	-762008.0927	-708696.5648	-923501.015	-1031111.755	-1038150.91
74	-567994.7564	-755615.3796	-800987.7265	-800966.944	-715830.5176	-625937.7378	-837555.7498	-839646.4034	-815312.0353	-691567.0074	-574804.5922	-788901.5729	-796652.871	-776822.8025	-654984.7949	-544341.9869	-757021.1627	-787784.8209	-777702.4911	-660508.9793	-678976.1592	-825547.6241	-855192.1461	-840226.6198	-732996.6116	-699721.9381	-907757.9005	-908522.1373	-883445.8099	-756892.6488	-647786.3373	-858232.9818	-864922.9882	-844409.8567	-719754.3852	-611508.9462	-820782.1087	-850462.4472	-839501.4627	-719400.1834	-789957.5649	-895479.8686	-909396.5039	-879486.2331	-750162.7057	-773506.0759	-977959.9888	-977397.8712	-951579.5846
75	-531407.8554	-745803.7244	-834027.5988	-821586.5446	-720021.4901	-563538.8817	-833219.5705	-896165.5565	-835280.8002	-693126.6322	-526506.2118	-787288.9984	-842332.3641	-792947.4975	-656331.7716	-531350.3239	-758592.3732	-802836.1647	-783378.7371	-661406.2837	-646101.0852	-822487.676	-884962.9603	-854368.8797	-736182.731	-637882.8284	-904372.8675	-964912.908	-902879.2075	-758404.2434	-600145.7232	-857202.9659	-910158.035	-860011.5949	-721035.0933	-598729.4761	-822360.7592	-865128.2491	-844874.2234	-720212.6269	-760794.315	-899171.6293	-935898.2557	-887151.154	-752343.972	-712226.7126	-975526.1055	-1033660.252	-970477.6147
76	-533034.026	-725896.7231	-789575.0661	-856918.2948	-798942.0221	-559470.2203	-776194.8859	-829976.0388	-916770.4783	-831322.9616	-523253.075	-742031.1427	-792748.4685	-862063.2296	-767928.2124	-532941.3135	-747946.6743	-791058.4188	-807090.1732	-693839.2385	-640142.7467	-794339.5221	-851296.5724	-897887.5204	-811873.4853	-633143.5369	-846829.4069	-900215.1431	-986087.2366	-896881.2887	-596372.9118	-811787.3328	-861733.3289	-929612.6432	-831851.6716	-599954.5972	-811520.8828	-853467.4768	-868128.9987	-751827.2358	-747251.4677	-862782.3213	-913018.016	-938856.6803	-824804.9485	-706816.7905	-917463.8654	-970454.2471	-1055403.995
77	-637313.8057	-827085.623	-825202.7617	-795828.6057	-708651.9251	-747624.9307	-955092.1077	-865414.6956	-808865.4545	-682843.4693	-668465.2458	-878946.7808	-813543.5649	-768290.7377	-645239.6533	-562596.4887	-775354.3003	-785177.8745	-767986.8004	-651739.2414	-751540.7636	-892993.3409	-875938.2621	-839562.1117	-729152.9099	-822407.7028	-1025256.009	-934259.6778	-877747.5785	-748843.4101	-741738.3572	-947964.6477	-881992.3221	-836765.785	-710807.0831	-630206.7908	-839482.9869	-848554.7039	-830744.1581	-711448.4413	-865767.7305	-958901.0588	-926673.7022	-883295.5552	-749653.895	-897190.4124	-1095419.849	-1003104.66	-946629.7024
78	-532850.1999	-726635.4408	-789628.2313	-864760.4445	-810623.3336	-558399.9988	-775577.744	-830395.6313	-931195.7262	-851204.4668	-522371.7512	-741578.6584	-793380.6544	-873960.3205	-783803.1178	-532571.0038	-747923.2535	-791352.7108	-810708.5624	-698103.5362	-639622.2951	-794572.6046	-852205.1053	-906299.6513	-823171.4425	-632128.2871	-846272.9702	-900832.5642	-1000739.431	-916845.0373	-595532.6342	-811374.8004	-862483.1206	-941567.5626	-847659.3586	-599593.3702	-811496.3006	-853772.2489	-871704.2381	-756017.3794	-746394.3906	-862509.7687	-914781.9167	-947838.7919	-835719.5514	-705856.5124	-916968.1338	-971269.497	-1070283.135
79	-532685.5542	-713169.0476	-840898.358	-897655.0364	-756542.4953	-556970.5931	-781249.9945	-937702.0224	-964504.6656	-731555.2394	-519968.5185	-746457.3431	-877614.3817	-895944.505	-685506.1368	-529138.4965	-745346.3436	-812615.0091	-813361.846	-666575.9829	-642144.23	-796881.7627	-906815.9964	-924403.8272	-763507.5766	-631131.0723	-853345.5565	-1008569.546	-1032040.694	-796027.713	-593602.4559	-817277.4959	-946621.855	-962313.1627	-749503.4357	-596648.8047	-809532.9076	-875169.7647	-874464.6523	-725235.5128	-751602.9058	-880594.4777	-972733.5723	-951152.5555	-770472.6597	-705291.49	-925441.0561	-1079437.078	-1099576.737
80	-532856.2197	-713988.836	-835390.2352	-887617.2991	-752575.841	-558014.3727	-781159.5574	-925916.9176	-948939.3343	-727745.776	-520958.7349	-746314.3234	-868111.041	-883691.8945	-682758.4974	-529812.7496	-745640.4724	-810103.9613	-810065.1242	-666383.8863	-642308.9821	-796441.5288	-900239.3651	-915467.5292	-760455.2211	-632083.0045	-853055.3214	-996573.7709	-1016500.283	-792274.228	-594508.0693	-816992.0696	-937030.6771	-950144.379	-746796.7538	-597263.4925	-809762.6217	-872635.5773	-871192.4556	-725025.7158	-751761.7445	-878894.2216	-965088.4326	-943317.6969	-768334.6028	-706151.5746	-924951.023	-1067230.631	-1084061.246
81	-532297.1689	-728857.8334	-789788.176	-888353.1289	-845765.929	-555180.2951	-773721.1061	-831657.9525	-974593.3059	-911016.9027	-519720.336	-740217.3838	-795282.5517	-909752.0766	-831561.914	-531456.9469	-747852.7932	-792238.0726	-821594.291	-710932.4458	-638056.5444	-795273.8209	-854938.3778	-931607.0932	-857160.7371	-629073.9628	-844598.9603	-902690.0425	-1044819.765	-976904.8977	-593004.7044	-810133.7188	-864738.8284	-977533.2926	-895215.932	-598506.6382	-811422.3462	-854689.1395	-882460.1531	-768623.2004	-743815.9205	-861689.8087	-920088.5167	-974860.99	-868555.5452	-702967.5672	-915476.752	-973722.1322	-1115046.225
82	-533513.6106	-717146.6008	-814173.3521	-848952.6742	-737296.5807	-562034.9351	-780811.2005	-880521.5621	-888982.8247	-713072.0032	-524772.9755	-745763.422	-831504.8723	-836495.7411	-672174.7929	-532409.9229	-746773.4352	-800431.5898	-797366.3949	-665643.9443	-642943.5951	-794745.7806	-874906.666	-881045.5678	-748697.7725	-635749.7771	-851937.3572	-950366.9272	-956639.7675	-777816.0803	-597996.4256	-815892.6284	-900086.1661	-903271.1204	-736370.8145	-599631.2246	-810647.4631	-862874.0741	-858588.1947	-724217.5932	-752373.5797	-872344.9603	-935639.9174	-913138.3989	-760098.9652	-709464.557	-923063.4515	-1020212.296	-1024296.718
83	-620004.8125	-809239.4758	-819156.2581	-797111.6508	-710444.4224	-717239.5919	-925743.2341	-858980.3432	-810475.1682	-685021.7401	-645078.1447	-856462.4579	-809325.9522	-770421.1975	-647673.0189	-558038.3326	-770776.5088	-785828.83	-770412.8121	-653929.0483	-733421.3541	-876152.1196	-870757.949	-839728.0396	-730112.6837	-791773.0203	-995916.6866	-927833.0041	-879170.4291	-750853.3081	-718278.5018	-925558.6163	-877730.1028	-838674.5127	-713041.2279	-625537.9318	-834813.3704	-849031.0681	-832930.8604	-713433.9944	-846837.9031	-943064.7633	-922359.5792	-882344.366	-749780.9452	-866306.3862	-1066090.077	-996685.665	-947865.6899
84	-600469.1	-789097.507	-812331.9007	-798559.7534	-712467.516	-682945.3244	-892618.7679	-851718.242	-812291.9639	-687480.235	-618682.4046	-831085.6341	-804565.7637	-772825.7309	-650419.4254	-552893.7915	-765609.8063	-786563.5279	-773150.9186	-656400.5634	-712970.969	-857144.3555	-864911.2133	-839915.3134	-731195.9278	-757197.3321	-962802.9999	-920579.5694	-880776.3226	-753121.7699	-691800.648	-900270.1559	-872919.5695	-840828.789	-715562.7847	-620268.4464	-829543.0301	-849568.7143	-835398.8716	-715674.9793	-825472.8437	-925191.2039	-917490.4648	-881270.8109	-749924.3398	-831449.2773	-1032987.169	-989440.8969	-949260.6813
85	-527238.6726	-781921.5475	-898922.4163	-847826.8694	-721035.482	-558867.3495	-909703.6482	-996153.5778	-859657.4759	-689242.3945	-522518.1908	-848359.1549	-920372.7201	-810289.2256	-651420.2445	-525391.4704	-773776.8502	-822795.7803	-784757.003	-656530.4327	-649592.2172	-865548.5294	-942681.3387	-874379.8508	-738089.893	-634724.9879	-982207.332	-1064693.37	-927007.587	-754925.2623	-597315.3545	-918895.9235	-987680.594	-877221.3283	-716589.4032	-593390.0711	-837814.954	-885021.919	-846487.8701	-715789.883	-771945.7618	-949175.5155	-986440.1899	-900932.7741	-755144.3043	-710582.5638	-1054710.962	-1133233.144	-994357.6982
86	-532105.4402	-729628.308	-789843.6268	-896532.4065	-857949.411	-554064.0656	-773077.4338	-832095.5829	-989638.6839	-931753.0984	-518801.1248	-739745.4476	-795941.9148	-922160.6142	-848119.2692	-531070.7178	-747828.3656	-792545.0161	-825368.2319	-715380.0623	-637513.719	-795516.9235	-855885.9679	-940380.8551	-868944.3847	-628015.0681	-844018.6028	-903334.0062	-1060101.846	-997726.8723	-592128.3039	-809703.4519	-865520.8531	-990002.1446	-911703.1792	-598129.8823	-811396.7072	-855007.0135	-886189.0893	-772993.4751	-742921.9983	-861405.5392	-921928.2461	-984229.2356	-879939.3584	-701966.0074	-914959.7093	-974572.429	-1130565.008
87	-532776.292	-713604.9049	-837969.8514	-892318.2672	-754433.542	-557525.54	-781201.9118	-931436.2294	-956229.0375	-729529.8599	-520494.9874	-746381.3037	-872561.7354	-889430.153	-684045.2979	-529496.977	-745502.7232	-811279.959	-811609.0762	-666473.8508	-642231.8239	-796647.7033	-903319.3953	-919652.6608	-761884.7291	-631637.1866	-853191.2471	-1002191.746	-1023778.315	-794032.0956	-594083.9439	-817125.7431	-941522.5083	-955843.3789	-748064.3727	-596975.6161	-809655.0398	-873822.4119	-872724.9217	-725123.9699	-751687.3557	-879690.5017	-968668.8767	-946986.992	-769335.9179	-705748.7716	-925180.5199	-1072947.27	-1091327.607
88	-531258.5924	-747096.7967	-836350.9308	-822525.9877	-720057.7926	-563371.6338	-835957.8154	-899745.2779	-836153.5218	-692987.5707	-526363.4346	-789475.4018	-845126.3261	-793568.3574	-656155.9316	-531136.988	-759136.0003	-803550.7489	-783428.0811	-661231.7209	-646226.073	-824029.3192	-887029.365	-855085.3025	-736251.0103	-637769.773	-907159.4583	-968485.1984	-903743.0397	-758279.6906	-600044.3917	-859411.6665	-912933.4591	-860627.7293	-720875.9309	-598538.3174	-822914.0426	-865840.4723	-844931.9944	-720054.286	-761193.5536	-900961.8436	-937707.7329	-887644.5567	-752444.2281	-712167.8496	-978361.0423	-1037225.112	-971332.5576
89	-533283.0497	-724896.0045	-789503.0447	-846294.772	-783117.7031	-560920.017	-777030.9092	-829407.6297	-897229.0319	-804390.0884	-524446.9777	-742644.1094	-791892.0653	-845946.6008	-746422.9588	-533442.9609	-747978.4018	-790659.7502	-802188.451	-688062.5235	-640847.7868	-794023.7722	-850065.8103	-886491.8614	-796568.4848	-634518.8651	-847583.1949	-899378.7413	-966238.3531	-869837.003	-597511.2104	-812346.178	-860717.6088	-913417.6759	-810437.4766	-600443.9405	-811554.1837	-853054.6112	-863285.7301	-746150.9751	-748412.5241	-863151.5402	-910628.5131	-926688.8857	-810019.2665	-708117.6503	-918135.418	-969349.8528	-1035247.674
90	-532004.6165	-740633.956	-824738.8004	-817830.6039	-719876.3512	-564207.5471	-822271.9294	-881853.6498	-831791.6152	-693682.6073	-527077.042	-778547.6475	-831161.9631	-790465.2682	-657034.789	-532203.2516	-756418.9246	-799979.2209	-783181.4574	-662104.1945	-645601.3778	-816324.1085	-876701.3702	-851504.5851	-735909.7471	-638334.8297	-893231.9371	-950630.7106	-899425.5626	-758902.2116	-600550.8514	-848372.4696	-899061.7496	-857548.2589	-721671.4325	-599493.7384	-820148.7043	-862280.7445	-844643.2521	-720845.6817	-759198.1392	-892014.2624	-928663.8747	-885178.5051	-751943.143	-712462.0498	-964191.8851	-1019407.766	-967059.51
91	-529212.166	-764825.0827	-868204.2868	-835405.9439	-720555.5064	-561078.6313	-873499.7125	-948823.9896	-848118.7135	-691081.0085	-524405.9308	-819451.4386	-883432.1161	-802080.4738	-653745.1285	-528212.1091	-766589.2388	-813347.8447	-784104.5973	-658838.4293	-647939.6809	-845165.5632	-915360.1952	-864907.606	-737187.133	-636219.7599	-945364.1872	-1017462.03	-915586.3562	-756572.047	-598655.1168	-889693.4027	-950985.0905	-869075.0566	-718693.7821	-595917.4923	-830499.671	-875605.1989	-845724.0462	-717883.4003	-766667.1957	-925506.0468	-962516.0349	-894409.2086	-753818.7598	-711360.8259	-1017228.606	-1086100.059	-983053.999
92	-530802.4797	-751048.1219	-843450.4873	-825396.7049	-720168.7243	-562860.5636	-844325.2484	-910684.0653	-838820.354	-692562.6313	-525927.1412	-796156.5367	-853664.0175	-795465.5594	-655618.6057	-530485.0836	-760797.1969	-805734.3504	-783578.8647	-660698.298	-646608.0063	-828740.2187	-893343.812	-857274.5223	-736459.6557	-637424.3021	-915674.6249	-979401.2786	-906382.708	-757899.0867	-599734.7466	-866160.9364	-921414.5029	-862510.4909	-720389.568	-597954.1813	-824604.7466	-868016.8593	-845108.5289	-719570.4335	-762413.5328	-906432.3177	-943237.07	-889152.2794	-752750.5872	-711987.9781	-987023.9431	-1048118.483	-973945.0621
93	-533592.7174	-723651.5842	-789413.4843	-833084.1377	-763439.7398	-562722.8779	-778070.5266	-828700.7977	-872928.7214	-770898.3413	-525931.6275	-743406.35	-790827.1051	-825905.1424	-719680.6016	-534066.7729	-748017.8557	-790163.9952	-796093.0285	-680879.0242	-641724.5229	-793631.1289	-848535.3247	-872321.0551	-777536.3079	-636229.1224	-848520.5504	-898338.6534	-941555.7364	-836206.7115	-598926.7152	-813041.1169	-859454.5337	-893278.8016	-783808.3533	-601052.4519	-811595.5942	-852541.2018	-857262.9962	-739092.3933	-749856.3287	-863610.6737	-907657.1025	-911557.9082	-791632.876	-709735.3042	-918970.5116	-967976.509	-1010182.751
94	-533272.8528	-724936.9817	-789505.9939	-846729.7816	-783765.6737	-560860.6511	-776996.6759	-829430.9048	-898029.2106	-805492.9296	-524398.09	-742619.0098	-791927.1331	-846606.5409	-747303.551	-533422.4196	-747977.1026	-790676.0748	-802389.1656	-688299.0671	-640818.917	-794036.7015	-850116.2072	-886958.4883	-797195.1905	-634462.5485	-847552.3289	-899412.9901	-967051.1207	-870944.4063	-597464.5996	-812323.2945	-860759.2002	-914080.8238	-811314.3402	-600423.903	-811552.8201	-853071.5171	-863484.0511	-746383.4053	-748364.9814	-863136.4215	-910726.3579	-927187.1298	-810624.7072	-708064.383	-918107.9194	-969395.0753	-1036073.031
95	-527164.9283	-782560.3977	-900070.2724	-848291.0069	-721053.4175	-558784.7197	-911056.4945	-997922.1606	-860088.6492	-689173.6903	-522447.6509	-849439.3606	-921753.0938	-810595.9651	-651333.3697	-525286.0705	-774045.4324	-823148.8249	-784781.3816	-656444.1889	-649653.9682	-866310.1875	-943702.2583	-874733.8038	-738123.6268	-634669.1322	-983584.0639	-1066458.281	-927434.3685	-754863.7263	-597265.2911	-919987.1453	-989051.8089	-877525.7332	-716510.7681	-593295.628	-838088.307	-885373.7972	-846516.4122	-715711.6538	-772143.008	-950059.9816	-987334.173	-901176.5426	-755193.8365	-710553.4822	-1056111.579	-1134994.384	-994780.0878
96	-532498.1116	-728050.3314	-789730.0604	-879780.773	-832996.9354	-556350.1682	-774395.7119	-831199.2906	-958824.8798	-889284.1706	-520683.7226	-740712.0003	-794591.501	-896747.2117	-814208.8484	-531861.7373	-747878.3948	-791916.3782	-817638.9827	-706271.0865	-638625.4569	-795019.0353	-853945.2486	-922411.6835	-844810.7931	-630183.7455	-845207.2085	-902015.1314	-1028803.262	-955082.2644	-593923.2228	-810584.6634	-863919.2214	-964465.2146	-877936.3436	-598901.5001	-811449.2174	-854355.9891	-878552.0123	-764042.8999	-744752.8026	-861987.7396	-918160.3739	-965042.5269	-856624.6508	-704017.2598	-916018.6427	-972830.972	-1098781.643
97	-527481.3428	-779819.2844	-895145.1681	-846299.533	-720976.4619	-559139.2593	-905251.839	-990333.7051	-858238.6144	-689468.4793	-522750.3164	-844804.5238	-915830.3267	-809279.8382	-651706.1234	-525738.3096	-772893.0271	-821634.0169	-784676.78	-656814.235	-649389.0134	-863042.1423	-939321.8001	-873215.0983	-737978.8853	-634908.7922	-977676.9226	-1058885.578	-925603.1778	-755127.7589	-597480.0981	-915305.0418	-983168.3393	-876219.6238	-716848.1677	-593700.8549	-836915.4318	-883863.994	-846393.9467	-716047.3119	-771296.6841	-946265.0043	-983498.3613	-900130.6053	-754981.309	-710678.2627	-1050101.952	-1127437.435	-992967.7412
98	-580447.5522	-768454.6259	-805337.8278	-800043.8691	-714540.922	-647798.1899	-858670.5267	-844275.539	-814153.9416	-689999.8705	-591630.2267	-805077.712	-799687.1936	-775290.0628	-653234.1325	-547621.3104	-760314.6126	-787316.4969	-775957.1193	-658933.5429	-692012.0016	-837663.8857	-858919.0746	-840107.2445	-732306.1112	-721761.7783	-928865.8062	-913145.7485	-882422.1532	-755446.6462	-664664.3142	-874352.7948	-867989.4025	-843036.6402	-718147.0503	-614867.9138	-824141.6213	-850119.7313	-837928.2599	-717971.6955	-803576.4549	-906873.1455	-912500.26	-880170.5574	-750071.3006	-795725.3042	-999061.0232	-982015.958	-950690.3648
99	-526249.4842	-790490.9321	-914319.4861	-854052.6996	-721276.0637	-557758.9727	-927850.4083	-1019876.929	-865441.1331	-688320.8128	-521571.9852	-862848.7783	-938888.7258	-814403.7575	-650254.9261	-523977.6613	-777379.5486	-827531.4373	-785084.013	-655373.5788	-650420.5299	-875765.2307	-956375.7126	-879127.6925	-738542.39	-633975.7526	-1000674.487	-1088367.475	-932732.333	-754099.8326	-596643.8158	-933533.3138	-1006073.746	-881304.5429	-715534.6102	-592123.2335	-841481.6461	-889741.9296	-846870.727	-714740.5343	-774591.5756	-961039.5341	-998431.8669	-904202.6279	-755808.7166	-710192.4699	-1073498.514	-1156858.001	-1000023.533
100	-533018.951	-725957.3033	-789579.426	-857561.4082	-799899.9747	-559382.4544	-776144.2758	-830010.4485	-917953.4537	-832953.3897	-523180.8	-741994.0357	-792800.3123	-863038.8777	-769230.0702	-532910.9454	-747944.7536	-791082.5529	-807386.9075	-694188.942	-640100.0659	-794358.6366	-851371.0787	-898577.3764	-812800	-633060.279	-846783.775	-900265.7761	-987288.8231	-898518.4614	-596304.0029	-811753.5021	-861794.8173	-930593.0336	-833148.017	-599924.9739	-811518.8669	-853492.4703	-868422.1943	-752170.8581	-747181.1811	-862759.97	-913162.6687	-939593.2789	-825700.0254	-706738.0407	-917423.2118	-970521.1035	-1056624.193
101	-529091.7066	-765868.6287	-870079.2816	-836164.1011	-720584.8034	-560943.6576	-875709.5537	-951712.9263	-848823.0246	-690968.7818	-524290.7056	-821215.9281	-885686.9226	-802581.5253	-653603.2206	-528039.9409	-767027.9613	-813924.5344	-784144.4193	-658697.5522	-648040.5495	-846409.713	-917027.8423	-865485.7795	-737242.2363	-636128.5209	-947613.045	-1020344.97	-916283.4933	-756471.5294	-598573.3395	-891475.8867	-953224.9364	-869572.2944	-718565.3335	-595763.2217	-830946.1864	-876179.9833	-845770.6691	-717755.6147	-766989.3925	-926950.8004	-963976.3342	-894807.3986	-753899.6693	-711313.3218	-1019516.48	-1088977.001	-983743.9621
102	-664173.9853	-854779.3609	-834585.7553	-793837.5702	-705870.3191	-794777.0469	-1000635.832	-875399.555	-806367.493	-679463.2181	-704757.4629	-913838.0624	-820088.4769	-764984.6797	-641463.5447	-569669.8575	-782458.1394	-784167.7186	-764222.1037	-648341.0884	-779658.5514	-919127.6301	-883977.0972	-839304.6239	-727663.5283	-869946.7519	-1070784.913	-944232.6214	-875539.592	-745724.4407	-778143.4748	-982734.436	-888606.4546	-833803.8122	-707340.1264	-637451.9489	-846729.3203	-847815.4795	-827350.8229	-708367.2505	-895143.1286	-983475.8992	-933368.3793	-884771.6152	-749456.7378	-945116.3944	-1140933.932	-1013065.688	-944711.6911
103	-526381.3715	-789348.3863	-912266.6133	-853222.6171	-721243.9872	-557906.7513	-925430.9226	-1016713.923	-864670.005	-688443.6861	-521698.1417	-860916.8942	-936420.0091	-813855.1719	-650410.2966	-524166.1627	-776899.2051	-826900.0378	-785040.4131	-655527.8207	-650310.092	-874403.0502	-954549.8582	-878494.6685	-738482.0591	-634075.6472	-998212.2839	-1085211.035	-931969.0595	-754209.8861	-596733.3513	-931581.7282	-1003621.409	-880760.1328	-715675.2445	-592292.1394	-840992.7705	-889112.6162	-846819.6812	-714880.4427	-774238.8125	-959457.7188	-996833.031	-903766.6622	-755720.1313	-710244.4807	-1070993.592	-1153708.127	-999268.114
104	-532810.9206	-713771.2425	-836852.2367	-890281.5801	-753628.696	-557737.326	-781183.5618	-929044.9963	-953070.7851	-728756.9084	-520695.9053	-746352.2846	-870633.4791	-886944.0615	-683487.7936	-529633.785	-745562.4029	-810770.4598	-810940.1614	-666434.8738	-642265.2526	-796558.3785	-901984.9771	-917839.4592	-761265.397	-631830.3365	-853132.3575	-999757.7672	-1020625.119	-793270.5022	-594267.6956	-817067.8293	-939576.4295	-953374.2962	-747515.1788	-597100.3381	-809701.6495	-873308.2177	-872060.9832	-725081.4015	-751719.5845	-879345.5146	-967117.6549	-945397.2757	-768902.0997	-705923.2854	-925081.0907	-1070470.545	-1088179.468
105	-532052.192	-710126.7042	-861339.7299	-934906.4069	-771263.274	-553096.9887	-781585.6184	-981438.1046	-1022269.668	-745692.6622	-516293.6946	-746988.1081	-912882.5359	-941415.563	-695702.9899	-526636.2541	-744254.7925	-821933.8398	-825596.4163	-667288.8787	-641532.8131	-798515.5286	-931222.7446	-957567.6105	-774835.2715	-627598.3262	-854422.6573	-1053087.456	-1089713.211	-809957.392	-590241.6047	-818336.7508	-982215.9846	-1007473.128	-759548.2901	-594367.617	-808680.4085	-884574.4692	-886608.2071	-726014.0972	-751013.4342	-886904.353	-1001105.697	-980228.7515	-778407.2716	-702099.6024	-927259.6338	-1124736.817	-1157156.775
106	-667499.031	-858207.5936	-835747.2845	-793591.0981	-705525.9816	-800614.0496	-1006273.731	-876635.5897	-806058.2681	-679044.7737	-709250.109	-918157.2854	-820898.6774	-764575.4198	-640996.0968	-570545.4762	-783337.53	-784042.6705	-763756.0685	-647920.428	-783139.2775	-922362.8171	-884972.2318	-839272.7493	-727479.1564	-875831.6534	-1076420.977	-945467.181	-875266.2634	-745338.3406	-782650.0969	-987038.6192	-889425.2239	-833437.1469	-706910.9487	-638348.8335	-847626.3504	-847723.9703	-826930.7588	-707985.8271	-898779.5355	-986518.0407	-934197.1194	-884954.338	-749432.3315	-951049.1947	-1146568.161	-1014298.772	-944474.2587
107	-609380.0388	-798284.9811	-815444.7348	-797899.2219	-711544.7105	-698588.1693	-907728.0244	-855030.7467	-811463.2583	-686358.8274	-630722.4479	-842660.9132	-806737.0563	-771728.937	-649166.6909	-555240.4011	-767966.5245	-786228.4058	-771901.9701	-655273.2168	-722299.1228	-865814.4781	-867578.119	-839829.8911	-730701.8214	-772968.543	-977907.3395	-923888.121	-880043.817	-752087.0431	-703878.1464	-911805.1293	-875113.8262	-839846.1463	-714412.6122	-622672.0476	-831947.0213	-849323.4746	-834273.1232	-714652.7858	-835218.2132	-933343.9751	-919711.4424	-881760.4978	-749858.9324	-847348.8543	-1048086.592	-992745.4953	-948624.3757
108	-533118.5649	-715249.0065	-826923.2052	-872187.3917	-746478.3404	-559618.8602	-781020.5385	-907800.9748	-925012.4659	-721889.9076	-522480.8854	-746094.4749	-853502.6025	-864857.3066	-678534.8542	-530849.2046	-746092.6043	-806244.0041	-804997.4372	-666088.5973	-642562.2374	-795764.8059	-890129.8347	-901730.7433	-755763.1713	-633546.3049	-852609.175	-978133.9873	-992611.7233	-786504.4092	-595900.1691	-816553.3151	-922287.2162	-931438.6489	-742636.07	-598208.3843	-810115.7357	-868740.0503	-866162.4681	-724703.218	-752005.9099	-876280.6053	-953336.4018	-931274.0324	-765048.0036	-707473.6878	-924197.7491	-1048467.005	-1060210.991
109	-532114.7718	-729590.8085	-789840.928	-896134.3152	-857356.4321	-554118.3933	-773108.7618	-832074.2831	-988906.4145	-930743.8528	-518845.8635	-739768.4171	-795909.8232	-921556.6818	-847313.4108	-531089.5158	-747829.5545	-792530.0769	-825184.5515	-715163.5936	-637540.1387	-795505.0915	-855839.848	-939953.8298	-868370.8661	-628066.6053	-844046.8492	-903302.664	-1059358.056	-996713.4518	-592170.9589	-809724.3933	-865482.7914	-989395.2766	-910900.733	-598148.2193	-811397.955	-854991.5424	-886007.5993	-772780.7707	-742965.5061	-861419.3748	-921838.7052	-983773.2763	-879385.3	-702014.7541	-914984.8741	-974531.0445	-1129809.697
110	-532561.5996	-712573.634	-844898.9159	-904945.4602	-759423.4823	-556212.4943	-781315.6791	-946261.5619	-975809.7893	-734322.0586	-519249.3229	-746561.2185	-884516.6725	-904843.5946	-687501.7514	-528648.7854	-745132.7173	-814438.787	-815756.26	-666715.5029	-642024.5703	-797201.5052	-911592.6136	-930894.2739	-765724.507	-630439.6825	-853556.3547	-1017282.096	-1043327.717	-798753.8748	-592944.7075	-817484.8015	-953587.9421	-971151.3687	-751469.3028	-596202.356	-809366.066	-877010.3488	-876841.2538	-725387.8887	-751487.541	-881829.3763	-978286.2489	-956843.0251	-772025.5337	-704666.8092	-925796.9679	-1088302.639	-1110845.661
111	-526437.4214	-788862.8236	-911394.1768	-852869.846	-721230.3553	-557969.5547	-924402.6818	-1015369.699	-864342.2885	-688495.9053	-521751.7561	-860095.876	-935370.8459	-813622.0322	-650476.3265	-524246.2727	-776695.0672	-826631.7036	-785021.8839	-655593.371	-650263.1577	-873824.1463	-953773.9008	-878225.6439	-738456.4195	-634118.1008	-997165.8887	-1083869.601	-931644.6811	-754256.657	-596771.4023	-930752.3371	-1002579.207	-880528.7677	-715735.0117	-592363.9216	-840785.0065	-888845.1686	-846797.9875	-714939.9014	-774088.8941	-958785.4738	-996153.5527	-903581.3841	-755682.484	-710266.5844	-1069929.043	-1152369.484	-998947.0736
112	-591510.8466	-779861.2501	-809202.5384	-799223.7922	-713395.2213	-667219.4206	-877429.2856	-848388.1489	-813125.0697	-688607.5971	-606578.4321	-819448.8936	-802382.9421	-773928.3484	-651678.8115	-550534.7221	-763240.5745	-786900.4293	-774406.4987	-657533.896	-703593.2854	-848428.197	-862230.147	-840001.1892	-731692.6579	-741342.3806	-947618.4606	-917253.4504	-881512.7176	-754161.9907	-679659.0216	-888673.9352	-870713.6619	-841816.6492	-716719.0642	-617852.0828	-827126.2745	-849815.2562	-836530.5973	-716702.6005	-815675.7291	-916995.1439	-915257.6944	-880778.5238	-749990.0946	-815465.2782	-1017807.573	-986118.752	-949900.3654
113	-533723.5946	-723125.6453	-789375.6327	-827500.8265	-755123.092	-563484.8348	-778509.908	-828402.0639	-862658.4957	-756743.4687	-526559.0965	-743728.5015	-790377.0129	-817434.868	-708378.2751	-534330.4193	-748034.5305	-789954.4705	-793516.8735	-677843.007	-642095.0646	-793465.183	-847888.4839	-866331.9391	-769492.5938	-636951.9415	-848916.7121	-897899.0731	-931123.9338	-821993.2848	-599524.9608	-813334.8242	-858920.7106	-884767.3554	-772553.8837	-601309.6318	-811613.0958	-852324.2157	-854717.5622	-736109.171	-750466.5348	-863804.7207	-906401.2726	-905162.9877	-783862.0955	-710418.9856	-919323.4536	-967396.0822	-999589.3719
114	-533013.0212	-725981.1323	-789581.141	-857814.374	-800276.7811	-559347.932	-776124.3685	-830023.9834	-918418.7719	-833594.7116	-523152.371	-741979.4398	-792820.7049	-863422.6446	-769742.1503	-532899.0003	-747943.9982	-791092.0459	-807503.6266	-694326.4963	-640083.2776	-794366.1552	-851400.3854	-898848.7282	-813164.4406	-633027.5299	-846765.8259	-900285.6924	-987761.462	-899162.4362	-596276.8979	-811740.195	-861819.0034	-930978.666	-833657.9288	-599913.3218	-811518.074	-853502.3014	-868537.5216	-752306.0204	-747153.5342	-862751.1783	-913219.5672	-939883.0167	-826052.1	-706707.0649	-917407.2209	-970547.4012	-1057104.152
115	-532279.401	-711218.0982	-854006.7014	-921543.0494	-765982.4205	-554486.5848	-781465.2185	-965748.4562	-1001547.36	-740621.0787	-517611.9813	-746797.7043	-900230.6268	-925103.5187	-692045.0253	-527533.8951	-744646.3697	-818590.8523	-821207.4519	-667033.1383	-641752.1495	-797929.4401	-922467.1982	-945670.6121	-770771.6348	-628865.6446	-854036.2639	-1037117.339	-1069024.081	-804960.3334	-591447.2585	-817956.7594	-969447.1368	-991272.6835	-755944.8527	-595185.9581	-808986.2295	-881200.6758	-882251.8932	-725734.792	-751224.8981	-884640.7821	-990927.6326	-969798.1124	-775560.8513	-703244.6431	-926607.2469	-1108486.231	-1136500.82
116	-533449.9899	-724225.1442	-789454.7632	-839172.99	-772509.4188	-561891.9296	-777591.3614	-829026.5803	-884128.865	-786334.8674	-525247.3444	-743055.0292	-791317.951	-835142.3582	-732006.2976	-533779.2546	-747999.6712	-790392.4913	-798902.4414	-684189.9376	-641320.4305	-793812.1003	-849240.7337	-878852.4558	-786308.3404	-635440.8556	-848088.5182	-898818.0355	-952932.087	-851707.0935	-598274.3014	-812720.8158	-860036.6918	-902560.9169	-796081.8593	-600771.9857	-811576.5078	-852777.8349	-860038.9066	-742345.7315	-749190.8714	-863399.0566	-909026.6416	-918531.857	-800107.2621	-708989.7188	-918585.6125	-968609.4905	-1021735.309
117	-596670.5843	-785181.1111	-811004.9756	-798841.3219	-712860.8854	-676277.1616	-886178.0608	-850306.2021	-812645.2209	-687958.2638	-613550.0281	-826151.3752	-803640.1946	-773293.2673	-650953.4355	-551893.4891	-764605.1948	-786706.3822	-773683.3149	-656881.1238	-708994.6048	-853448.4939	-863774.3765	-839951.7268	-731406.5534	-750474.4499	-956364.3887	-919169.2147	-881088.5718	-753562.8486	-686652.3053	-895353.0784	-871984.2114	-841247.6656	-716053.0751	-619243.8499	-828518.2674	-849673.254	-835878.7506	-716110.7155	-821318.6306	-921715.8766	-916543.7162	-881062.0692	-749952.2214	-824671.6758	-1026550.654	-988032.2272	-949531.9228
118	-533227.4425	-725119.4658	-789519.1272	-848667.0136	-786651.2869	-560596.2762	-776844.2245	-829534.5559	-901592.6535	-810404.2218	-524180.3782	-742507.2334	-792083.3009	-849545.4577	-751225.1002	-533330.9426	-747971.317	-790748.7732	-803283.0097	-689352.4689	-640690.3507	-794094.2795	-850340.6405	-889036.5217	-799986.1044	-634211.7531	-847414.8734	-899565.5105	-970670.6256	-875876.015	-597257.0274	-812221.3874	-860944.4199	-917034.0258	-815219.2845	-600334.6697	-811546.7476	-853146.8044	-864367.2361	-747418.4889	-748153.2592	-863069.0933	-911162.0911	-929405.9646	-813320.9218	-707827.1672	-917985.4597	-969596.465	-1039748.598
119	-646006.8096	-836048.399	-828239.4652	-795184.2288	-707751.6887	-762885.1984	-969831.8371	-868646.1864	-808057.0166	-681749.4879	-680210.8257	-890238.9633	-815661.7543	-767220.7681	-644017.557	-564885.7073	-777653.3803	-784850.9486	-766768.3974	-650639.4663	-760640.7788	-901451.4184	-878539.9433	-839478.7786	-728670.8878	-837793.1972	-1039990.942	-937487.3121	-877032.9878	-747833.9897	-753520.4762	-959217.5102	-884132.9138	-835807.1749	-709685.0404	-632551.6072	-841828.1836	-848315.462	-829645.9422	-710451.2475	-875274.7575	-966854.4377	-928840.3614	-883773.2659	-749590.0872	-912701.1334	-1110149.985	-1006328.438	-946008.959
120	-533193.7716	-715610.2605	-824495.9555	-867764.0889	-744730.3655	-560078.8197	-780980.6858	-902607.6644	-918153.3332	-720211.2015	-522917.2414	-746031.4508	-849314.7909	-859457.9816	-677324.0593	-531146.3259	-746222.2173	-805137.4674	-803544.6797	-666003.9467	-642634.8383	-795570.8092	-887231.7283	-897792.8088	-754418.098	-633965.7903	-852481.2779	-972847.8411	-985763.5724	-784850.3711	-596299.2433	-816427.5371	-918060.6976	-926076.2636	-741443.3237	-598479.2571	-810216.9632	-867623.3168	-864720.518	-724610.7673	-752075.9049	-875531.358	-949967.4386	-927821.4663	-764105.8318	-707852.699	-923981.8075	-1043088.023	-1053373.822
121	-532596.6776	-727654.2372	-789701.5537	-875575.8796	-826733.5164	-556924.0118	-774726.618	-830974.3087	-951090.1857	-878623.8781	-521156.2808	-740954.6185	-794252.5284	-890368.0937	-805696.8604	-532060.2942	-747890.9529	-791758.5813	-815698.8335	-703984.6066	-638904.5186	-794894.0585	-853458.101	-917901.1711	-838752.9254	-630728.1138	-845505.5651	-901684.0755	-1020946.881	-944377.8737	-594373.7724	-810805.8597	-863517.1895	-958055.0894	-869460.3976	-599095.1869	-811462.3982	-854192.5729	-876634.9996	-761796.1809	-745212.3599	-862133.88	-917214.5855	-960226.3958	-850772.3344	-704532.1527	-916284.4497	-972393.842	-1090803.576
122	-533443.3565	-716809.1368	-816440.7582	-853084.6857	-738929.4448	-561605.2656	-780848.4287	-885372.8734	-895390.2575	-714640.1601	-524365.3552	-745822.2957	-835416.9007	-841539.5	-673305.8523	-532132.3681	-746652.3577	-801465.2569	-798723.4829	-665723.0205	-642875.7753	-794927.0018	-877613.9211	-884724.1743	-749954.2676	-635357.9164	-852056.8318	-955304.9606	-963036.9417	-779361.1938	-597623.6319	-816010.1235	-904034.3525	-908280.3723	-737485.0139	-599378.1898	-810552.9019	-863917.2665	-859935.187	-724303.9557	-752308.1941	-873044.8668	-938787.0216	-916363.6004	-760979.0914	-709110.5052	-923265.1725	-1025237.052	-1030683.634
123	-533034.3269	-725895.5141	-789574.9791	-856905.4607	-798922.905	-559471.9718	-776195.8959	-829975.3522	-916746.8707	-831290.4245	-523254.5173	-742031.8832	-792747.4339	-862043.7594	-767902.2323	-532941.9196	-747946.7126	-791057.9371	-807084.2515	-693832.2598	-640143.5985	-794339.1406	-851295.0855	-897873.7535	-811854.9956	-633145.1984	-846830.3175	-900214.1326	-986063.2575	-896848.617	-596374.287	-811788.0079	-861732.1018	-929593.0784	-831825.8015	-599955.1883	-811520.9231	-853466.978	-868123.1476	-751820.3784	-747252.8703	-862782.7674	-913015.1293	-938841.9806	-824787.0862	-706818.3621	-917464.6767	-970452.9129	-1055379.644
124	-531996.878	-730064.5726	-789875.0246	-901163.7446	-864848.0427	-553432.0249	-772712.9684	-832343.3816	-998157.802	-943494.5183	-518280.6414	-739478.2239	-796315.2649	-929186.6788	-857494.5115	-530852.024	-747814.534	-792718.8162	-827505.1438	-717898.4285	-637206.3559	-795654.575	-856422.5202	-945348.807	-875616.6189	-627415.4921	-843689.988	-903698.6366	-1068754.991	-1009516.863	-591632.0612	-809459.8226	-865963.6576	-997062.361	-921038.7243	-597916.5525	-811382.1896	-855187.0028	-888300.5183	-775468.0481	-742415.8343	-861244.5778	-922969.9529	-989533.8009	-886385.195	-701398.896	-914666.9451	-975053.8911	-1139352.181
125	-525768.1871	-794660.4308	-921811.0466	-857081.9242	-721393.1205	-557219.6837	-936679.8513	-1031419.704	-868255.2151	-687872.4102	-521111.6018	-869898.8139	-947897.8281	-816405.714	-649687.9316	-523289.7618	-779132.4687	-829835.6069	-785243.1222	-654810.7028	-650823.5517	-880736.2438	-963038.8136	-881437.7907	-738762.5558	-633611.2065	-1009659.821	-1099886.289	-935517.7513	-753698.2135	-596317.0736	-940655.2466	-1015023.073	-883291.2618	-715021.3927	-591506.8441	-843265.7028	-892038.4863	-847057.009	-714229.9657	-775878.9163	-966812.0619	-1004266.508	-905793.5999	-756131.9914	-710002.6668	-1082639.739	-1168352.854	-1002780.288
126	-531958.374	-730219.3033	-789886.1605	-902806.3504	-867294.7939	-553207.8578	-772583.7027	-832431.2689	-1001179.294	-947658.8707	-518096.0406	-739383.4472	-796447.6817	-931678.6269	-860819.6471	-530774.4594	-747809.6283	-792780.4582	-828263.0466	-718791.6223	-637097.3428	-795703.3961	-856612.8202	-947110.8002	-877983.0732	-627202.8393	-843573.4375	-903827.9607	-1071824.02	-1013698.442	-591456.0578	-809373.4142	-866120.7079	-999566.4217	-924349.7804	-597840.8903	-811377.0407	-855250.84	-889049.383	-776345.7097	-742236.3121	-861187.4893	-923339.4171	-991415.1815	-888671.3525	-701197.7575	-914563.1098	-975224.6522	-1142468.745
127	-532664.7903	-727380.522	-789681.8545	-872670.1475	-822405.2694	-557320.5583	-774955.2861	-830818.8382	-945745.2348	-871257.2339	-521482.8355	-741122.2763	-794018.2861	-885959.8945	-799814.7715	-532197.5041	-747899.6309	-791649.538	-814358.1208	-702404.5671	-639097.3602	-794807.695	-853121.4645	-914784.2453	-834566.7217	-631104.2918	-845711.7402	-901455.304	-1015517.84	-936980.7561	-594685.1184	-810958.7143	-863239.3711	-953625.4631	-863603.2149	-599229.0315	-811471.5066	-854079.6464	-875310.2751	-760243.6174	-745529.9306	-862234.8682	-916561.0118	-956898.2765	-846728.174	-704887.9622	-916468.1319	-972091.7695	-1085290.446
128	-526037.5699	-792326.7554	-917618.0076	-855386.4621	-721327.6036	-557521.5247	-931737.9973	-1024959.194	-866680.1687	-688123.3819	-521369.2792	-865952.8972	-942855.4185	-815285.2156	-650005.2794	-523674.7803	-778151.3564	-828545.9593	-785154.0685	-655125.7455	-650597.9797	-877953.9594	-959309.4649	-880144.8249	-738639.3286	-633815.2435	-1004630.715	-1093439.19	-933958.748	-753923.0004	-596499.9517	-936669.0889	-1010014.12	-882179.2919	-715308.6414	-591851.8383	-842267.1633	-890753.0997	-846952.7466	-714515.7318	-775158.3896	-963581.1685	-1001000.85	-904903.1302	-755951.054	-710108.8999	-1077523.38	-1161919.165	-1001237.327
129	-531488.6299	-745103.9717	-832770.3159	-821078.1602	-720001.8449	-563629.3887	-831737.7554	-894228.372	-834808.5225	-693201.8861	-526583.4764	-786105.8151	-840820.3974	-792611.516	-656426.9283	-531465.7717	-758298.1866	-802449.4638	-783352.0344	-661500.7492	-646033.4475	-821653.4079	-883844.7149	-853981.1838	-736145.7813	-637944.0089	-902864.8897	-962979.7448	-902411.7402	-758471.6457	-600200.5592	-856007.7164	-908656.1002	-859678.1707	-721121.2248	-598832.9227	-822061.3471	-864742.8258	-844842.9603	-720298.3139	-760578.2651	-898202.8457	-934919.048	-886884.1466	-752289.7179	-712258.5666	-973991.965	-1031731.111	-970014.958
130	-529083.0903	-765943.2722	-870213.3975	-836218.3311	-720586.899	-560934.0031	-875867.6208	-951919.5681	-848873.403	-690960.7544	-524282.4637	-821342.1397	-885848.2059	-802617.3649	-653593.0702	-528027.626	-767059.3425	-813965.7843	-784147.2677	-658687.4755	-648047.7645	-846498.7054	-917147.1269	-865527.1355	-737246.1777	-636121.9947	-947773.9028	-1020551.183	-916333.3586	-756464.3395	-598567.4901	-891603.3854	-953385.1496	-869607.8612	-718556.1458	-595752.187	-830978.125	-876221.0969	-845774.0039	-717746.4744	-767012.4388	-927054.1418	-964080.7875	-894835.8806	-753905.4566	-711309.9239	-1019680.129	-1089182.785	-983793.3143
131	-533179.9033	-715543.6443	-824943.547	-868579.7581	-745052.6969	-559994.0019	-780988.0348	-903565.3251	-919418.1761	-720520.7595	-522836.7762	-746043.0727	-850087.0349	-860453.6319	-677547.3332	-531091.5359	-746198.3163	-805341.5158	-803812.5722	-666019.5565	-642621.4505	-795606.5827	-887766.1471	-898518.9748	-754666.1333	-633888.436	-852504.8625	-973822.621	-987026.3902	-785155.3802	-596225.6529	-816450.7309	-918840.0793	-927065.1022	-741663.2694	-598429.3074	-810198.2965	-867829.2455	-864986.4176	-724627.8155	-752062.9976	-875669.5212	-950588.6846	-928458.129	-764279.5709	-707782.8083	-924021.6277	-1044079.922	-1054634.615
132	-528551.9224	-770544.8038	-878481.2146	-839561.4363	-720716.085	-560338.8342	-885611.9485	-964658.3769	-851979.0731	-690465.8895	-523774.3765	-829122.6822	-895790.8087	-804826.7591	-652967.3252	-527268.4481	-768993.8957	-816508.7062	-784322.8634	-658066.2757	-648492.5464	-851984.8023	-924500.6416	-868076.6002	-737489.1566	-635719.6753	-957690.2743	-1033263.548	-919407.395	-756021.1057	-598206.8916	-899463.2748	-963261.7833	-871800.4389	-717989.75	-595071.9289	-832947.0412	-878755.6171	-845979.5879	-717183.002	-768433.1705	-933424.8044	-970519.9992	-896591.7051	-754262.2284	-711100.4538	-1029768.545	-1101868.705	-986835.7169
133	-528711.4266	-769163.0117	-875998.4751	-838557.5366	-720677.2918	-560517.5572	-882685.8282	-960833.0451	-851046.4727	-690614.4923	-523926.9498	-826786.2662	-892805.1485	-804163.301	-653155.2299	-527496.4213	-768412.9695	-815745.0932	-784270.1338	-658252.8155	-648358.9831	-850337.3845	-922292.4577	-867311.0225	-737416.1926	-635840.4876	-954712.4911	-1029446.157	-918484.2939	-756154.2042	-598315.1756	-897103.0318	-960295.9329	-871142.0306	-718159.8327	-595276.2033	-832355.7962	-877994.527	-845917.8532	-717352.2069	-768006.5396	-931511.7607	-968586.3709	-896064.4493	-754155.0935	-711163.3555	-1026739.098	-1098059.255	-985922.115
134	-532327.9623	-711451.3614	-852439.4161	-918686.9042	-764853.7458	-554783.5827	-781439.4854	-962395.1138	-997118.3891	-739537.1312	-517893.7382	-746757.0094	-897526.5392	-921617.1519	-691263.21	-527725.7476	-744730.0613	-817876.3569	-820269.4003	-666978.479	-641799.0282	-797804.1757	-920595.8787	-943127.8713	-769903.1153	-629136.5081	-853953.6802	-1033704.052	-1064602.201	-803892.314	-591704.9424	-817875.5439	-966718.056	-987810.1688	-755174.6915	-595360.8618	-809051.5925	-880479.5962	-881320.8199	-725675.0962	-751270.0942	-884156.99	-988752.2789	-967568.7759	-774952.4871	-703489.3722	-926467.8125	-1105012.999	-1132086.031
135	-631555.2489	-821148.3597	-823191.1407	-796255.464	-709248.2739	-737515.9835	-945327.9838	-863274.0406	-809400.9928	-683568.1617	-660684.5535	-871466.4353	-812140.4006	-768999.5238	-646049.2136	-561080.0285	-773831.3075	-785394.442	-768793.9141	-652467.7718	-745512.5882	-887390.4079	-874214.8154	-839617.3145	-729472.2186	-812215.801	-1015495.063	-932121.5774	-878220.9489	-749512.0863	-733933.4602	-940510.3491	-880574.3175	-837400.8027	-711550.3643	-628653.5006	-837929.4447	-848713.1862	-831471.6556	-712109.0182	-859469.9358	-953632.4562	-925238.4297	-882979.1025	-749696.1635	-886915.5561	-1085662.08	-1000969.114	-947040.9051
136	-563878.1288	-751370.9997	-799549.6762	-801272.0928	-716256.8304	-618711.1404	-830575.6567	-838116.1103	-815694.8763	-692085.0693	-569242.3977	-783554.0877	-795649.7889	-777329.4934	-655563.5265	-543257.9128	-755932.4186	-787939.6387	-778279.4736	-661029.7848	-674666.7889	-821542.2474	-853960.1033	-840266.0827	-733224.8763	-692436.0388	-900780.0789	-906993.6704	-883784.2089	-757370.6663	-642206.8395	-852904.1168	-863909.2972	-844863.8127	-720285.7357	-610398.5434	-819671.5258	-850575.7417	-840021.5299	-719872.4109	-785455.4515	-891713.4951	-908370.4685	-879260.0101	-750192.9223	-766160.8748	-970984.4386	-975871.2305	-951873.5416
137	-533161.2156	-725385.6034	-789538.281	-851492.3021	-790859.7089	-560210.7079	-776621.887	-829685.7223	-906789.6323	-817566.9246	-523862.864	-742344.2171	-792311.0583	-853831.6184	-756944.3466	-533197.5313	-747962.8792	-790854.7977	-804586.6055	-690888.7659	-640502.8478	-794178.252	-850667.9573	-892067.1571	-804056.4154	-633845.9894	-847214.4061	-899787.9486	-975949.3663	-883068.3475	-596954.3009	-812072.7645	-861214.5471	-921341.0204	-820914.3143	-600204.5306	-811537.8913	-853256.6046	-865655.2863	-748928.0704	-747844.4803	-862970.9008	-911797.571	-932641.9467	-817253.1219	-707481.2082	-917806.8627	-969890.1748	-1045109.1
138	-533476.9674	-716970.5858	-815355.9891	-851107.8549	-738148.2524	-561810.8274	-780830.6181	-883051.9162	-892324.823	-713889.9248	-524560.3683	-745794.1295	-833545.3139	-839126.4723	-672764.7325	-532265.1555	-746710.2834	-800970.7314	-798074.2269	-665685.189	-642908.2216	-794840.3022	-876318.7201	-882964.2608	-749353.1371	-635545.3898	-851999.673	-952942.514	-959976.4151	-778621.9829	-597801.9833	-815953.9116	-902145.467	-905883.8534	-736951.9602	-599499.2463	-810598.1417	-863418.184	-859290.761	-724262.6383	-752339.4758	-872710.0186	-937281.3886	-914820.6043	-760558.0227	-709279.8901	-923168.6654	-1022833.116	-1027628.015
139	-527966.1224	-775619.6159	-887599.3999	-843248.3894	-720858.5581	-559682.4506	-896358.5076	-978707.408	-855404.1702	-689920.1264	-523214.0311	-837703.4753	-906756.036	-807263.3958	-652277.2205	-526431.1866	-771127.4232	-819313.1747	-784516.5195	-657381.1838	-648983.0754	-858035.1598	-932610.486	-870888.2846	-737757.1265	-635275.9761	-968626.5724	-1047283.415	-922797.6047	-755532.284	-597809.2046	-908131.5759	-974154.2564	-874218.5293	-717365.0988	-594321.7043	-835118.4659	-881550.8198	-846206.3168	-716561.5749	-770000.0284	-940450.7075	-977621.5019	-898528.1212	-754655.6951	-710869.4392	-1040894.582	-1115859.407	-990191.0392
140	-529878.489	-759052.6961	-857832.7323	-831212.189	-720393.4492	-561825.2403	-861275.9508	-932843.8042	-844222.8088	-691701.7912	-525043.3003	-809691.1452	-870959.6284	-799308.9015	-654530.0937	-529164.459	-764162.4405	-810157.879	-783884.3214	-659617.6927	-647381.7247	-838283.5346	-906135.5863	-861709.4326	-736882.3284	-636724.4491	-932924.6053	-1001515.017	-911730.1345	-757128.0612	-599107.4692	-879833.5726	-938595.3576	-866324.5798	-719404.2967	-596770.8413	-828029.7661	-872425.7727	-845466.1516	-718590.2476	-764884.9603	-917514.3758	-954438.3724	-892206.6163	-753371.2079	-711623.5954	-1004573.203	-1070186.22	-979237.4602
141	-532801.9742	-713728.2686	-837140.9767	-890807.7658	-753836.631	-557682.6103	-781188.3026	-929662.7802	-953886.7314	-728956.6033	-520643.9974	-746359.7818	-871131.6513	-887586.3525	-683631.8269	-529598.4401	-745546.9844	-810902.0908	-811112.978	-666444.9436	-642256.6161	-796581.4559	-902329.729	-918307.9066	-761425.4037	-631780.4355	-853147.5718	-1000386.595	-1021439.759	-793467.2627	-594220.2226	-817082.7916	-940079.2062	-954012.1929	-747657.0651	-597068.1157	-809689.6077	-873441.0617	-872232.5142	-725092.3992	-751711.2581	-879434.6433	-967518.4189	-945807.9848	-769014.1782	-705878.1991	-925106.7786	-1071110.416	-1088992.801
142	-533626.9685	-717691.1137	-810514.7938	-842285.4939	-734661.8834	-562728.2255	-780751.1312	-872693.7603	-878644.1531	-710541.7138	-525430.6885	-745668.4267	-825192.6444	-828357.4166	-670349.7793	-532857.7695	-746968.7989	-798763.723	-795176.6746	-665516.3516	-643053.0254	-794453.3722	-870538.3921	-875109.9762	-746670.363	-636382.0613	-851744.5798	-942399.1956	-946317.6488	-775322.9726	-598597.9444	-815703.0449	-893715.5957	-895188.4747	-734573.0053	-600039.5073	-810800.0418	-861190.8378	-856414.7641	-724078.2436	-752479.0822	-871215.6307	-930561.9279	-907934.396	-758678.8433	-710035.8351	-922737.9659	-1012104.634	-1013991.151
143	-624407.1869	-813778.4701	-820694.1276	-796785.3207	-709988.5182	-724967.8079	-933207.8352	-860616.8583	-810065.7532	-684467.7181	-651026.4268	-862181.1272	-810398.661	-769879.3358	-647054.116	-559197.6554	-771940.8256	-785663.2658	-769795.7796	-653372.0922	-738029.85	-880435.5207	-872075.5113	-839685.8375	-729868.5746	-799564.6544	-1003378.859	-929467.5662	-878808.5408	-750342.1101	-724245.2883	-931257.3729	-878814.1569	-838189.0463	-712472.9948	-626725.4108	-836001.042	-848909.9095	-832374.6939	-712928.9882	-851652.5209	-947092.5713	-923456.8345	-882586.2917	-749748.6312	-874161.4385	-1073549.82	-998318.274	-947551.3285
144	-532920.9448	-726351.1476	-789607.7708	-861742.4173	-806127.8168	-558811.8703	-775815.2492	-830234.1524	-925644.2139	-843553.1307	-522710.9259	-741752.7956	-793137.3596	-869381.7617	-777693.7092	-532713.5163	-747932.2669	-791239.4534	-809316.0364	-696462.4343	-639822.5893	-794482.9035	-851855.4592	-903062.2686	-818823.4584	-632519.0028	-846487.1131	-900594.9516	-995100.5787	-909162.05	-595856.0125	-811533.5622	-862194.5655	-936966.7486	-841575.8188	-599732.3873	-811505.761	-853654.9583	-870328.3182	-754404.8155	-746724.2341	-862614.6597	-914103.0849	-944382.0539	-831519.1	-706226.0725	-917158.9146	-970955.7506	-1064556.944
145	-527951.5019	-775746.2745	-887826.9741	-843340.4094	-720862.114	-559666.0684	-896626.7232	-979058.0476	-855489.6547	-689906.5051	-523200.0458	-837917.6371	-907029.7092	-807324.21	-652259.9967	-526410.29	-771180.6724	-819383.1694	-784521.3529	-657364.0851	-648995.3182	-858186.1663	-932812.8937	-870958.4594	-737763.8145	-635264.9022	-968899.5236	-1047633.327	-922882.2185	-755520.0838	-597799.279	-908347.9218	-974426.1138	-874278.8807	-717349.5085	-594302.98	-835172.661	-881620.5832	-846211.9756	-716546.0651	-770039.1345	-940626.0619	-977798.7432	-898576.4508	-754665.5153	-710863.6735	-1041172.269	-1116208.591	-990274.7822
146	-532100.5432	-710358.9582	-859779.2251	-932062.6183	-770139.4822	-553392.7017	-781559.9967	-978099.2698	-1017859.859	-744613.4041	-516574.2325	-746947.5892	-910190.1471	-937944.2793	-694924.5569	-526827.2765	-744338.122	-821222.4355	-824662.4229	-667234.4559	-641579.489	-798390.8061	-929359.521	-955035.8704	-773970.5095	-627868.0178	-854340.4309	-1049688.936	-1085310.462	-808893.9932	-590498.1738	-818255.8867	-979498.7106	-1004025.593	-758781.4608	-594541.7641	-808745.4888	-883856.5093	-885681.162	-725954.6597	-751058.4347	-886422.6539	-998939.7544	-978009.0599	-777801.5393	-702343.2727	-927120.8026	-1121278.612	-1152761.086
147	-532353.5425	-728631.292	-789771.8719	-885948.1899	-842183.6406	-555508.4982	-773910.364	-831529.2768	-970169.5391	-904919.8745	-519990.6101	-740356.1464	-795088.6803	-906103.6155	-826693.5832	-531570.5091	-747859.9757	-792147.8226	-820484.6456	-709624.7207	-638216.1505	-795202.3418	-854659.7595	-929027.359	-853696.0113	-629385.3077	-844769.6018	-902500.699	-1040326.401	-970782.6481	-593262.3909	-810260.2294	-864508.8911	-973867.0973	-890368.2149	-598617.4151	-811429.8848	-854595.6755	-881363.7404	-767338.2161	-744078.7589	-861773.392	-919547.5842	-972106.4608	-865208.3821	-703262.0542	-915628.7772	-973472.1209	-1110483.264
148	-633755.3959	-823416.7843	-823959.7121	-796092.3761	-709020.4295	-741378.2654	-949058.5205	-864091.9114	-809196.382	-683291.2816	-663657.2891	-874324.4187	-812676.5015	-768728.7209	-645739.9084	-561659.4159	-774413.1908	-785311.699	-768485.5437	-652189.4253	-747815.7472	-889531.0964	-874873.2853	-839596.2234	-729350.2217	-816109.777	-1019224.386	-932938.4722	-878040.0903	-749256.6081	-736915.4436	-943358.3808	-881116.0884	-837158.1842	-711266.3821	-629246.9595	-838522.9998	-848652.6356	-831193.7038	-711856.6344	-861876.1071	-955645.4085	-925786.7981	-883100.0082	-749680.0141	-890841.2262	-1089390.189	-1001785.033	-946883.7987
149	-580652.5447	-768665.9799	-805409.4373	-800028.6738	-714519.6932	-648158.0472	-859018.109	-844351.7418	-814134.8776	-689974.073	-591907.203	-805343.9965	-799737.1433	-775264.8315	-653205.3138	-547675.2932	-760368.8279	-787308.7876	-775928.3878	-658907.6087	-692226.5919	-837863.3383	-858980.4257	-840105.2794	-732294.7445	-722124.5886	-929213.2754	-913221.8604	-882405.3022	-755422.8427	-664942.1522	-874618.1521	-868039.8805	-843014.0349	-718120.5911	-614923.2076	-824196.9241	-850114.0897	-837902.3625	-717948.1804	-803800.6432	-907060.6967	-912551.3526	-880181.8224	-750069.7959	-796091.0674	-999408.3793	-982091.979	-950675.7268
150	-532090.8564	-710312.4278	-860091.8613	-932632.3513	-770364.626	-553333.4577	-781565.1298	-978768.1818	-1018743.333	-744829.6259	-516518.0287	-746955.7069	-910729.5482	-938639.7265	-695080.5105	-526789.0065	-744321.4275	-821364.9604	-824849.5419	-667245.3591	-641570.1378	-798415.7934	-929732.8047	-955543.0867	-774143.7585	-627813.987	-854356.9043	-1050369.805	-1086192.522	-809107.0377	-590446.772	-818272.0873	-980043.0973	-1004716.283	-758935.0897	-594506.8749	-808732.4504	-884000.3475	-885866.8889	-725966.5676	-751049.4192	-886519.159	-999373.6857	-978453.7595	-777922.8935	-702294.4551	-927148.6165	-1121971.439	-1153641.731
151	-532548.1487	-712509.0225	-845333.0372	-905736.582	-759736.1132	-556130.2291	-781322.8068	-947190.4019	-977036.567	-734622.3005	-519171.2792	-746572.4906	-885265.6759	-905809.2811	-687718.3059	-528595.6444	-745109.5356	-814636.6946	-816016.0903	-666730.6429	-642011.5854	-797236.2021	-912110.9492	-931598.586	-765965.0776	-630364.6562	-853579.2295	-1018227.54	-1044552.531	-799049.7048	-592873.3318	-817507.2973	-954343.8684	-972110.4484	-751682.6293	-596153.9096	-809347.9611	-877210.0802	-877099.1511	-725404.4238	-751475.0221	-881963.3816	-978888.7987	-957460.5275	-772194.0441	-704599.0219	-925835.5897	-1089264.687	-1112068.511
152	-670249.0535	-861042.9581	-836707.9424	-793387.2502	-705241.1928	-805441.6189	-1010936.628	-877657.8683	-805802.5196	-678698.6939	-712965.8105	-921729.5552	-821568.7643	-764236.9361	-640609.488	-571269.668	-784064.8415	-783939.2479	-763370.628	-647572.5153	-786018.0575	-925038.5208	-885795.2709	-839246.3869	-727326.6693	-880698.838	-1081082.357	-946488.2396	-875040.2034	-745019.0116	-786377.3576	-990598.4502	-890102.3979	-833133.8916	-706555.9917	-639090.6136	-848368.2509	-847648.2864	-826583.3394	-707670.3659	-901787.0732	-989034.0835	-934882.5397	-885105.4612	-749412.146	-955955.9946	-1151228.023	-1015318.611	-944277.8872
153	-533603.2964	-723609.0716	-789410.4247	-832632.8292	-762767.4911	-562784.4682	-778106.0426	-828676.6505	-872098.5617	-769754.1791	-525982.3469	-743432.39	-790790.7234	-825220.4758	-718767.0154	-534088.0839	-748019.2036	-790147.059	-795884.7935	-680633.6178	-641754.4745	-793617.7152	-848483.0395	-871836.9447	-776886.1209	-636287.5491	-848552.5728	-898303.1214	-940712.5162	-835057.8162	-598975.0724	-813064.8578	-859411.3839	-892590.807	-782898.6355	-601073.2402	-811597.0088	-852523.6624	-857057.2445	-738851.2544	-749905.6527	-863626.3588	-907555.5917	-911040.9959	-791004.7507	-709790.5673	-918999.0405	-967929.5921	-1009326.471
154	-531801.7513	-742391.386	-827896.4685	-819107.4122	-719925.6903	-563980.2386	-825993.5106	-886718.8917	-832977.7415	-693493.6071	-526882.9919	-781519.2143	-834959.2701	-791309.0863	-656795.8027	-531913.3042	-757157.7747	-800950.4208	-783248.5214	-661866.9442	-645771.2502	-818419.3742	-879509.8454	-852478.2839	-736002.5462	-638181.1747	-897019.2257	-955485.853	-900599.6073	-758732.9304	-600413.1306	-851374.3408	-902833.8614	-858385.6544	-721455.113	-599233.9323	-820900.6783	-863248.7356	-844721.7693	-720630.4787	-759740.7491	-894447.3639	-931123.1567	-885849.0946	-752079.4023	-712382.0484	-968044.8814	-1024252.808	-968221.473
155	-614563.4877	-803629.2892	-817255.4549	-797514.994	-711007.9191	-707687.5346	-916517.0041	-856957.6142	-810981.2043	-685706.5101	-637726.0814	-849394.1956	-808000.0865	-771090.9375	-648437.9815	-556605.4123	-769337.4158	-786033.467	-771175.4629	-654617.4448	-727725.2636	-870857.8455	-869129.4449	-839780.2014	-730414.4021	-782142.5782	-986693.459	-925812.6891	-879617.7221	-751485.1477	-710903.5673	-918514.9661	-876390.2145	-839274.548	-713743.5626	-624070.2106	-833345.411	-849180.8199	-833618.281	-714058.1808	-840887.0464	-938086.4017	-921003.3741	-882045.3463	-749820.8852	-856597.5594	-1056869.852	-994667.7639	-948254.2399
156	-533147.969	-715390.2485	-825974.2061	-870457.9816	-745794.9223	-559798.6938	-781004.957	-905770.5094	-922330.7021	-721233.5719	-522651.4906	-746069.834	-851865.2641	-862746.2941	-678061.4611	-530965.3722	-746143.28	-805811.3736	-804429.4423	-666055.5009	-642590.6227	-795688.9576	-888996.7415	-900191.1011	-755237.2785	-633710.3141	-852559.1702	-976067.2251	-989934.2531	-785857.7182	-596056.1979	-816504.1388	-920634.7442	-929342.079	-742169.7335	-598314.2894	-810155.3133	-868303.4331	-865598.6987	-724667.0719	-752033.2763	-875987.6667	-952019.2143	-929924.1581	-764679.636	-707621.8725	-924113.3209	-1046363.946	-1057537.815
157	-532057.9683	-729819.0771	-789857.3564	-898557.5909	-860966.034	-553787.6878	-772918.0609	-832203.94	-993363.9108	-936887.3684	-518573.5286	-739628.5964	-796105.1728	-925232.9609	-852218.8607	-530975.0877	-747822.3173	-792621.0151	-826302.6574	-716481.2896	-637379.3157	-795577.1155	-856120.5906	-942553.2334	-871862.009	-627752.8864	-843874.9066	-903493.4512	-1063885.68	-1002882.381	-591911.3076	-809596.9181	-865714.4819	-993089.4251	-915785.412	-598036.5977	-811390.359	-855085.719	-887112.3717	-774075.5525	-742700.6637	-861335.1543	-922383.7621	-986548.8078	-882757.9839	-701718.0218	-914831.6898	-974782.962	-1134407.449
158	-533440.0936	-724264.9133	-789457.6254	-839595.1752	-773138.2867	-561834.3139	-777558.1373	-829049.1692	-884905.4539	-787405.196	-525199.898	-743030.6696	-791351.985	-835782.8428	-732860.9294	-533759.3188	-747998.4103	-790408.3347	-799097.2388	-684419.5077	-641292.4118	-793824.6484	-849289.6449	-879305.3262	-786916.5704	-635386.1993	-848058.5622	-898851.2746	-953720.8936	-852781.8497	-598229.0648	-812698.607	-860077.0571	-903204.5147	-796932.8723	-600752.5389	-811575.1845	-852794.2425	-860231.381	-742571.3096	-749144.7303	-863384.3836	-909121.6019	-919015.4125	-800694.854	-708938.0219	-918558.9246	-968653.3798	-1022536.333
159	-533430.34	-724304.1088	-789460.4462	-840011.2698	-773758.0825	-561777.5292	-777525.3925	-829071.4323	-885670.8395	-788460.0839	-525153.1361	-743006.6613	-791385.528	-836414.0875	-733703.232	-533739.6707	-747997.1677	-790423.9494	-799289.226	-684645.766	-641264.7973	-793837.0155	-849337.8506	-879751.6633	-787516.0259	-635332.3314	-848029.0384	-898884.0342	-954498.3207	-853841.1012	-598184.4807	-812676.7185	-860116.8401	-903838.8277	-797771.6084	-600733.3727	-811573.8801	-852810.4133	-860421.0787	-742793.6334	-749099.2549	-863369.9223	-909215.1923	-919491.9921	-801273.9692	-708887.0707	-918532.6217	-968696.6359	-1023325.802
160	-533040.5577	-725870.475	-789573.177	-856639.6487	-798526.9635	-559508.2473	-776216.8141	-829961.1299	-916257.9226	-830616.535	-523284.39	-742047.2203	-792726.0057	-861640.504	-767364.1477	-532954.4713	-747947.5065	-791047.962	-806961.6052	-693687.7201	-640161.2393	-794331.2402	-851264.2905	-897588.6219	-811472.048	-633179.6106	-846849.1781	-900193.205	-985566.6171	-896171.9398	-596402.7684	-811801.9908	-861706.6874	-929187.8628	-831289.9952	-599967.4322	-811521.7563	-853456.6477	-868001.9638	-751678.3522	-747281.9212	-862792.0056	-912955.3413	-938537.5293	-824417.1325	-706850.911	-917481.4797	-970425.2798	-1054875.311
161	-670006.8163	-860793.2035	-836623.3223	-793405.2062	-705266.2786	-805016.3798	-1010525.895	-877567.8203	-805825.0474	-678729.1785	-712638.5109	-921414.8899	-821509.7394	-764266.7516	-640643.5426	-571205.8772	-784000.7758	-783948.3579	-763404.5798	-647603.1614	-785764.4786	-924802.83	-885722.773	-839248.7091	-727340.1012	-880270.1094	-1080671.757	-946398.2991	-875060.116	-745047.1399	-786049.0398	-990284.8805	-890042.7486	-833160.6041	-706587.2583	-639025.2735	-848302.9002	-847654.953	-826613.942	-707698.1535	-901522.1526	-988812.4565	-934822.1641	-885092.1495	-749413.924	-955523.7764	-1150817.557	-1015228.778	-944295.1847
162	-532776.7723	-726930.5148	-789649.4677	-867892.9183	-815289.3248	-557972.5088	-775331.2325	-830563.2336	-936957.7573	-859145.9492	-522019.7146	-741397.9177	-793633.1752	-878712.5029	-790144.2011	-532423.087	-747913.8983	-791470.2631	-812153.8943	-699806.8703	-639414.4055	-794665.7073	-852568.0104	-909659.7988	-827684.3064	-631722.755	-846050.7067	-901079.1874	-1006592.113	-924819.371	-595196.9931	-811210.0181	-862782.6179	-946342.844	-853973.5922	-599449.0814	-811486.4814	-853893.9873	-873132.3343	-757691.0933	-746052.0391	-862400.9001	-915486.4904	-951426.6129	-840079.288	-705472.9382	-916770.1184	-971595.1409	-1076226.469
163	-532137.7944	-710537.8937	-858576.9657	-929871.6787	-769273.6795	-553620.5277	-781540.257	-975526.9318	-1014462.41	-743781.9115	-516790.3673	-746916.3723	-908115.8504	-935269.8987	-694324.8289	-526974.4459	-744402.3216	-820674.3485	-823942.8466	-667192.5269	-641615.4495	-798294.7161	-927924.0379	-953085.3422	-773304.271	-628075.7963	-854277.0812	-1047070.615	-1081918.452	-808074.7191	-590695.8423	-818193.5867	-977405.2416	-1001369.51	-758190.6726	-594675.9321	-808795.6285	-883303.3715	-884966.9387	-725908.8673	-751093.1045	-886051.5386	-997271.0477	-976298.9432	-777334.865	-702531.0036	-927013.843	-1118614.307	-1149374.515
164	-526359.5819	-789537.1508	-912605.7764	-853359.7583	-721249.2867	-557882.3362	-925830.6553	-1017236.496	-864797.4061	-688423.3858	-521677.2989	-861236.0683	-936827.8754	-813945.8058	-650384.6272	-524135.0197	-776978.5646	-827004.3538	-785047.6164	-655502.3378	-650328.3379	-874628.1013	-954851.5148	-878599.2529	-738492.0266	-634059.1432	-998619.0741	-1085732.523	-932095.1629	-754191.7037	-596718.5588	-931904.1573	-1004026.569	-880850.0769	-715652.0097	-592264.2338	-841073.5395	-889216.5875	-846828.1147	-714857.3279	-774297.0939	-959719.0567	-997097.181	-903838.6898	-755734.7668	-710235.8878	-1071407.44	-1154228.53	-999392.9197
165	-531048.1659	-748919.7316	-839626.2951	-823850.3866	-720108.9707	-563135.8528	-839818.1116	-904791.8626	-837383.8588	-692791.5258	-526162.1517	-792557.7282	-849065.1706	-794443.6273	-655908.0375	-530836.2334	-759902.3896	-804558.1485	-783497.6448	-660985.6275	-646402.277	-826202.682	-889942.5208	-856095.2941	-736347.2683	-637610.3908	-911087.9111	-973521.3072	-904960.8447	-758104.0999	-599901.5376	-862525.4268	-916846.1694	-861496.3371	-720651.5485	-598268.8275	-823694.0451	-866844.5435	-845013.4382	-719831.0618	-761756.3882	-903485.6344	-940258.68	-888340.1411	-752585.5662	-712084.8663	-982357.6519	-1042250.744	-972537.8306
166	-532498.4126	-728049.1219	-789729.9734	-879767.933	-832977.8096	-556351.9205	-774396.7223	-831198.6036	-958801.2614	-889251.6187	-520685.1655	-740712.7411	-794590.466	-896727.7327	-814182.8565	-531862.3436	-747878.4332	-791915.8963	-817633.0583	-706264.1045	-638626.309	-795018.6537	-853943.761	-922397.9103	-844792.295	-630185.4078	-845208.1196	-902014.1205	-1028779.272	-955049.5778	-593924.5985	-810585.3388	-863917.9937	-964445.6409	-877910.4618	-598902.0916	-811449.2576	-854355.4901	-878546.1586	-764036.0394	-744754.2059	-861988.1858	-918157.4859	-965027.8206	-856606.7804	-704018.8321	-916019.4543	-972829.6372	-1098757.282
167	-532684.6487	-727300.7196	-789676.1112	-871822.9737	-821143.3576	-557436.1725	-775021.9548	-830773.5103	-944186.9004	-869109.4694	-521578.0434	-741171.1574	-793949.9921	-884674.6724	-798099.8331	-532237.508	-747902.161	-791617.7461	-813967.2325	-701943.9024	-639153.5837	-794782.5155	-853023.3173	-913875.4975	-833346.223	-631213.9674	-845771.8511	-901388.605	-1013934.989	-934824.107	-594775.8921	-811003.2795	-863158.3724	-952333.994	-861895.538	-599268.0542	-811474.1622	-854046.7224	-874924.0482	-759790.9635	-745622.5191	-862264.3116	-916370.4607	-955927.9546	-845549.0884	-704991.6994	-916521.6849	-972003.6995	-1083683.078
168	-614111.6844	-803163.4649	-817097.6277	-797548.4843	-711054.7073	-706894.4095	-915750.933	-856789.6633	-811023.2214	-685763.3678	-637115.6259	-848807.3046	-807889.9974	-771146.5472	-648501.4978	-556486.4343	-769217.9253	-786050.4584	-771238.7872	-654674.6037	-727252.3066	-870418.252	-868994.2272	-839784.5325	-730439.4543	-781342.9447	-985927.6373	-925644.9385	-879654.8617	-751537.6105	-710291.2127	-917930.1187	-876278.961	-839324.37	-713801.8788	-623948.3429	-833223.5236	-849193.254	-833675.3588	-714110.0082	-840392.9356	-937673.0391	-920890.7658	-882020.5182	-749824.2015	-855791.4174	-1056104.279	-994500.2138	-948286.5019
169	-655677.6313	-846019.3376	-831617.7471	-794467.3702	-706750.1907	-779861.9914	-986229.5398	-872241.1659	-807157.6428	-680532.4518	-693277.5872	-902801.3276	-818018.2045	-766030.4448	-642657.9952	-567432.4248	-780211.0683	-784487.249	-765412.9444	-649415.9848	-770764.3935	-910860.8882	-881434.2702	-839386.0719	-728134.6463	-854909.3026	-1056383.309	-941078.0014	-876238.0175	-746711.0263	-766627.8867	-971736.1317	-886514.2865	-834740.7371	-708436.7867	-635160.1761	-844437.1758	-848049.3094	-828424.1953	-709341.8861	-885851.1661	-975702.4388	-931250.7335	-884304.7111	-749519.1021	-929956.5513	-1126537.015	-1009914.837	-945318.3923
170	-532639.8103	-712949.3175	-842374.7149	-900345.4781	-757605.6883	-556690.826	-781274.2346	-940860.8157	-968676.6832	-732576.3002	-519703.1082	-746495.677	-880161.5877	-899228.6051	-686242.5939	-528957.7746	-745267.5074	-813288.0521	-814245.4752	-666627.471	-642100.0711	-796999.7597	-908578.7485	-926799.0471	-764325.7076	-630875.9234	-853423.349	-1011784.806	-1036206.032	-797033.7696	-593359.7219	-817353.9995	-949192.6042	-965574.7945	-750228.9149	-596484.0483	-809471.3368	-875849.0097	-875341.708	-725291.7453	-751560.3318	-881050.202	-974782.7197	-953252.5536	-771045.7289	-705060.9592	-925572.401	-1082708.805	-1103735.395
171	-533614.2011	-723565.2502	-789407.2709	-832167.6256	-762074.5448	-562847.9547	-778142.652	-828651.7599	-871242.8425	-768574.7896	-526034.6279	-743459.2318	-790753.2215	-824514.7293	-717825.3012	-534110.051	-748020.5929	-790129.6013	-795670.1473	-680380.6556	-641785.3481	-793603.8885	-848429.1444	-871337.9292	-776215.9155	-636347.7747	-848585.5811	-898266.4954	-939843.3344	-833873.548	-599024.9184	-813089.3296	-859366.9055	-891881.63	-781960.9088	-601094.6686	-811598.4671	-852505.5831	-856845.1579	-738602.6912	-749956.4953	-863642.5269	-907450.9554	-910508.1687	-790357.2863	-709847.5319	-919028.4478	-967881.2307	-1008443.826
172	-533729.4313	-718183.2916	-807207.8723	-836259.1197	-732280.4161	-563354.8814	-780696.8353	-865618.316	-869299.1674	-708254.6194	-526025.1865	-745582.5617	-819487.1068	-821001.2949	-668700.1741	-533262.572	-747145.3856	-797256.1608	-793197.4159	-665401.0222	-643151.9379	-794189.0682	-866589.9682	-869744.8751	-744837.8148	-636953.5746	-851570.3308	-935197.2704	-936987.6249	-773069.4861	-599141.6491	-815531.683	-887957.3231	-887882.6804	-732947.9899	-600408.5485	-810937.9556	-859669.3832	-854450.2295	-723952.2874	-752574.4445	-870194.8449	-925972.0017	-903230.568	-757395.2142	-710552.2056	-922443.7638	-1004776.227	-1004676.088
173	-673846.6864	-864752.2372	-837964.6937	-793120.5723	-704868.6265	-811757.139	-1017036.722	-878995.2331	-805467.9445	-678245.9455	-717826.7636	-926402.868	-822445.3851	-763794.1251	-640103.7188	-572217.0699	-785016.3245	-783803.9483	-762866.3873	-647117.3692	-789784.1335	-928538.9284	-886871.9866	-839211.8992	-727127.1826	-887066.1835	-1087180.465	-947824.0084	-874744.4673	-744601.2591	-791253.4325	-995255.4903	-890988.2899	-832737.1672	-706091.6301	-640061.0248	-849338.8195	-847549.2752	-826128.8386	-707257.6734	-905721.5926	-992325.6197	-935779.2199	-885303.1636	-749385.7389	-962375.1656	-1157324.146	-1016652.784	-944020.9902
174	-527022.9448	-783790.4071	-902280.2959	-849184.6335	-721087.9494	-558625.6285	-913661.1957	-1001327.3	-860918.8084	-689041.4108	-522311.837	-851519.1335	-924410.7948	-811186.5458	-651166.1053	-525083.1389	-774562.5469	-823828.559	-784828.3191	-656278.1395	-649772.8603	-867776.6451	-945667.8848	-875415.2869	-738188.5761	-634561.5905	-986234.7532	-1069856.352	-928256.0718	-754745.248	-597168.9016	-922088.1279	-991691.8761	-878111.8187	-716359.368	-593113.792	-838614.6068	-886051.2854	-846571.3657	-715561.0352	-772522.7758	-951762.8874	-989055.4023	-901645.8822	-755289.2031	-710497.49	-1058808.257	-1138385.386	-995593.3353
175	-652399.3177	-842639.2873	-830472.5427	-794710.3782	-707089.6887	-774107.0252	-980670.8796	-871022.5031	-807462.5217	-680945.0151	-688848.0833	-898542.8094	-817219.391	-766433.9527	-643118.8733	-566569.1126	-779344.0372	-784610.5396	-765872.4297	-649830.733	-767332.5875	-907671.1703	-880453.1218	-839417.4986	-728316.4269	-849107.1109	-1050826.457	-939860.793	-876507.5046	-747091.6999	-762184.6032	-967492.4419	-885707.0245	-835102.249	-708859.9324	-634275.8969	-843552.753	-848139.5325	-828838.3555	-709717.9487	-882265.8674	-972703.0533	-930433.641	-884124.5564	-749543.1653	-924107.1341	-1120981.973	-1008699.083	-945552.4876
176	-532172.2754	-739181.5192	-822129.1299	-816775.3794	-719835.5747	-564395.4074	-819196.21	-877832.7464	-830811.3352	-693838.8074	-527237.4157	-776091.7813	-828023.6599	-789767.8906	-657232.3004	-532442.88	-755808.2983	-799176.5679	-783126.032	-662300.2713	-645460.986	-814592.4657	-874380.2919	-850699.8668	-735833.0527	-638461.8187	-890101.9135	-946618.154	-898455.2675	-759042.1148	-600664.6714	-845891.5582	-895944.2689	-856856.1892	-721850.2108	-599708.4564	-819527.2316	-861480.7434	-844578.3611	-721023.5373	-758749.6966	-890003.4136	-926631.3889	-884624.2931	-751830.5309	-712528.1674	-961007.557	-1015403.556	-966099.1999
177	-532194.037	-738992.9971	-821790.4021	-816638.4143	-719830.282	-564419.7912	-818796.9905	-877310.8446	-830684.0976	-693859.0818	-527258.2317	-775773.0169	-827616.3171	-789677.3729	-657257.9368	-532473.9831	-755729.0408	-799072.3858	-783118.8379	-662325.7215	-645442.7635	-814367.7035	-874079.0226	-850595.4167	-735823.098	-638478.3015	-889695.6454	-946097.3356	-898329.326	-759060.2738	-600679.4449	-845569.543	-895539.6288	-856766.3606	-721873.4157	-599736.3262	-819446.5662	-861376.9056	-844569.9385	-721046.6224	-758691.49	-889742.4112	-926367.578	-884552.3579	-751815.9141	-712536.7492	-960594.2404	-1014883.821	-965974.5544
178	-604206.3164	-792950.7013	-813637.4124	-798282.7288	-712080.4946	-689505.8786	-898955.537	-853107.4948	-811944.4077	-687009.9206	-623731.9565	-835940.2655	-805476.3962	-772365.7394	-649894.0329	-553877.9513	-766598.2056	-786422.9789	-772627.114	-655927.7582	-716883.1639	-860780.5744	-866029.7042	-839879.4876	-730988.7013	-763811.7226	-969137.7069	-921967.1643	-880469.1123	-752687.8091	-696865.9084	-905107.8832	-873839.833	-840416.6721	-715080.4064	-621276.5083	-830551.2556	-849465.8616	-834926.7367	-715246.2749	-829560.0175	-928610.4475	-918421.935	-881476.1839	-749896.9082	-838117.504	-1039319.814	-990826.8339	-948993.8169
179	-532259.458	-738426.2522	-820772.1015	-816226.6628	-719814.3709	-564493.0948	-817596.8363	-875741.877	-830301.5897	-693920.0315	-527320.81	-774814.7312	-826391.7425	-789405.2542	-657335.0063	-532567.4868	-755490.7727	-798759.1884	-783097.2108	-662402.2312	-645387.9822	-813692.0117	-873173.3315	-850281.4135	-735793.1717	-638527.8529	-888474.3016	-944531.6249	-897950.7142	-759114.8645	-600723.8578	-844601.4845	-894323.1793	-856496.3131	-721943.1755	-599820.1098	-819204.0659	-861064.7429	-844544.6179	-721116.0221	-758516.5065	-888957.7724	-925574.4965	-884336.1029	-751771.9726	-712562.5485	-959351.7068	-1013321.368	-965599.8387
180	-526323.7717	-789847.3761	-913163.1747	-853585.1432	-721257.9962	-557842.2112	-926487.5968	-1018095.319	-865006.7836	-688390.023	-521643.0447	-861760.6157	-937498.1842	-814094.7584	-650342.4409	-524083.8375	-777108.9879	-827175.7921	-785059.4547	-655460.4579	-650358.3241	-874997.9621	-955347.2728	-878771.1323	-738508.4077	-634032.0197	-999287.6144	-1086589.563	-932302.4078	-754161.8219	-596694.248	-932434.054	-1004692.431	-880997.8958	-715613.8246	-592218.3723	-841206.2796	-889387.4594	-846841.9747	-714819.3398	-774392.8765	-960148.553	-997531.2987	-903957.0637	-755758.8196	-710221.7658	-1072087.579	-1155083.788	-999598.0319
181	-532655.9223	-727416.1585	-789684.4193	-873048.4614	-822968.7886	-557268.9296	-774925.5145	-830839.0798	-946441.1246	-872216.3394	-521440.3195	-741100.448	-794048.7834	-886533.8232	-800580.5943	-532179.64	-747898.5011	-791663.7349	-814532.6759	-702610.2815	-639072.2531	-794818.9391	-853165.2931	-915190.0557	-835111.7475	-631055.315	-845684.8971	-901485.089	-1016224.678	-937943.8291	-594644.5824	-810938.8133	-863275.5418	-954202.1816	-864365.7951	-599211.6055	-811470.3207	-854094.349	-875482.7486	-760445.7546	-745488.5842	-862221.72	-916646.1043	-957331.5834	-847254.7064	-704841.6373	-916444.2173	-972131.098	-1086008.232
182	-532155.1694	-710621.354	-858016.1996	-928849.7657	-768869.8459	-553726.7919	-781531.0498	-974327.1243	-1012877.748	-743394.0811	-516891.1784	-746901.8118	-907148.3427	-934022.4958	-694045.0997	-527043.0897	-744432.266	-820418.7059	-823607.2169	-667172.9701	-641632.2224	-798249.8972	-927254.4901	-952175.5635	-772993.5195	-628172.7097	-854247.5332	-1045849.359	-1080336.328	-807692.5876	-590788.0402	-818164.5282	-976428.7915	-1000130.641	-757915.1132	-594738.5117	-808819.015	-883045.3732	-884633.8058	-725887.5084	-751109.2754	-885878.4404	-996492.7181	-975501.2989	-777117.1956	-702618.5663	-926963.9541	-1117371.604	-1147794.928
183	-532060.4318	-740150.425	-823870.0146	-817479.309	-719862.7763	-564270.0877	-821247.9911	-880515.0502	-831465.27	-693734.6079	-527130.432	-777730.0647	-830117.1901	-790233.1041	-657100.5426	-532283.0263	-756215.6409	-799712.0096	-783163.0057	-662169.4705	-645554.64	-815747.627	-875928.6597	-851236.6862	-735884.2147	-638377.1056	-892189.9204	-949294.8897	-899102.5415	-758948.7868	-600588.7432	-847546.549	-898023.9085	-857317.8619	-721730.9496	-599565.2202	-819941.8097	-862014.416	-844621.6492	-720904.8916	-759048.8481	-891344.8304	-927987.2395	-884994.0023	-751905.6533	-712484.061	-963131.7899	-1018074.724	-966739.813
184	-528984.9168	-766793.7537	-871741.5029	-836836.223	-720610.7759	-560824.0005	-877668.6234	-954274.0279	-849447.4108	-690869.2906	-524188.5561	-822780.1843	-887685.8549	-803025.7178	-653477.4164	-527887.3104	-767416.8977	-814435.7817	-784179.7223	-658572.6617	-648129.9717	-847512.6774	-918506.2458	-865998.3422	-737291.0865	-636047.6357	-949606.7036	-1022900.755	-916901.5197	-756382.4185	-598500.8422	-893056.0953	-955210.6058	-870013.106	-718451.4612	-595626.4578	-831342.0314	-876689.5415	-845812.0011	-717642.3301	-767275.0266	-928231.6042	-965270.9196	-895160.4022	-753971.3972	-711271.2084	-1021544.728	-1091527.47	-984355.6286
185	-530335.4359	-755094.144	-850720.1908	-828336.2213	-720282.3146	-562337.2452	-852893.214	-921885.01	-841551.0991	-692127.5078	-525480.3917	-802997.7906	-862406.3218	-797408.2295	-655068.4023	-529817.5557	-762498.2055	-807970.2837	-783733.262	-660152.0912	-646999.0929	-833564.019	-899809.5902	-859516.2087	-736673.3014	-637070.5518	-924393.8647	-990578.9719	-909085.6383	-757509.3613	-599417.6806	-873071.9584	-930098.8022	-864438.3746	-719891.5491	-597356.0458	-826335.9698	-870245.4052	-845289.2942	-719074.9851	-763662.7498	-912033.8963	-948898.9223	-890696.136	-753064.2884	-711803.7959	-995894.4577	-1059272.924	-976620.1775
186	-609892.3746	-798813.2163	-815623.7077	-797861.2445	-711491.6536	-699487.5571	-908596.7335	-855221.1997	-811415.6117	-686294.3518	-631414.6921	-843326.4357	-806861.8951	-771665.8767	-649094.6648	-555375.3198	-768102.0244	-786209.138	-771830.1616	-655208.3998	-722835.4465	-866312.9682	-867731.4532	-839824.9797	-730673.4126	-773875.3113	-978775.766	-924078.3467	-880001.7014	-752027.5513	-704572.544	-912468.3344	-875239.9853	-839789.6491	-714346.4829	-622810.2431	-832085.2391	-849309.3745	-834208.3981	-714594.0146	-835778.5248	-933812.72	-919839.1379	-881788.6525	-749855.1718	-848263.003	-1048954.736	-992935.4937	-948587.7912
187	-531970.6144	-709734.8477	-863972.5963	-939704.4158	-773159.3231	-552598.0651	-781628.847	-987071.3499	-1029709.851	-747513.5745	-515820.3741	-747056.4711	-917425.1048	-947272.2747	-697016.3534	-526313.9631	-744114.1997	-823134.1133	-827172.2395	-667380.7003	-641454.0621	-798725.9591	-934366.3549	-961839.1345	-776294.2884	-627143.3054	-854561.3888	-1058821.401	-1097141.482	-811751.5468	-589808.7242	-818473.1837	-986800.5394	-1013289.771	-760842.0761	-594073.7981	-808570.6059	-885785.8033	-888172.3075	-726114.3796	-750937.5097	-887717.0705	-1004760.051	-983973.7908	-779429.2565	-701688.4845	-927493.8681	-1130571.463	-1164573.134
188	-533623.5913	-717674.8911	-810623.7931	-842484.129	-734740.3789	-562707.5703	-780752.9208	-872926.9738	-878952.1728	-710617.0987	-525411.0933	-745671.2569	-825380.7044	-828599.8814	-670404.1518	-532844.4268	-746962.9785	-798813.4137	-795241.9128	-665520.153	-643049.7651	-794462.0839	-870668.5359	-875286.8151	-746730.7655	-636363.2237	-851750.3232	-942636.5779	-946625.1753	-775397.2497	-598580.0234	-815708.6932	-893905.3939	-895429.2807	-734626.5674	-600027.3433	-810795.4961	-861240.9864	-856479.5171	-724082.3953	-752475.939	-871249.2767	-930713.2162	-908089.4387	-758721.1529	-710018.815	-922747.6631	-1012346.185	-1014298.184
189	-524492.0272	-805715.8631	-941674.9309	-865113.9181	-721703.4969	-555789.7578	-960091.1333	-1062025.392	-875716.758	-686683.4701	-519890.8943	-888591.9942	-971785.4769	-821713.9049	-648184.5449	-521465.7952	-783780.339	-835945.1163	-785665.0004	-653318.2363	-651892.1646	-893916.8928	-980706.0363	-887563.0197	-739346.3258	-632644.6119	-1033484.448	-1130428.444	-942903.2924	-752633.3199	-595450.716	-959539.0623	-1038752.228	-888559.05	-713660.5957	-589872.4867	-847996.132	-898127.8101	-847550.9358	-712876.1924	-779292.3021	-982117.9284	-1019737.067	-910012.0648	-756989.155	-709499.4035	-1106877.712	-1198831.472	-1010089.827
190	-532808.1783	-726804.3073	-789640.3846	-866553.1134	-813293.6121	-558155.3525	-775436.6691	-830491.5476	-934493.2523	-855749.2611	-522170.2858	-741475.2232	-793525.1684	-876679.925	-787432.027	-532486.3532	-747917.8996	-791419.9843	-811535.7047	-699078.3294	-639503.3229	-794625.8859	-852412.7906	-908222.6145	-825754.0885	-631896.207	-846145.772	-900973.7031	-1004088.835	-921408.6318	-595340.5517	-811280.4979	-862654.5185	-944300.3863	-851272.9021	-599510.7958	-811490.6812	-853841.918	-872521.5167	-756975.2214	-746198.4679	-862447.4648	-915185.1339	-949892.0494	-838214.5649	-705636.9985	-916854.8125	-971455.8583	-1073684.418
191	-529182.9369	-765078.2958	-868659.2484	-835589.9084	-720562.6152	-561045.8804	-874035.9235	-949524.981	-848289.6124	-691053.777	-524377.9718	-819879.5864	-883979.2378	-802202.0524	-653710.695	-528170.333	-766695.6934	-813487.7766	-784114.2599	-658804.2459	-647964.1563	-845467.4522	-915764.8445	-865047.8979	-737200.5036	-636197.621	-945909.8655	-1018161.567	-915755.5144	-756547.6567	-598635.2738	-890125.9168	-951528.582	-869195.7098	-718662.6144	-595880.059	-830608.0165	-875744.6686	-845735.3591	-717852.3935	-766745.3757	-925856.6117	-962870.3719	-894505.8282	-753838.3922	-711349.2992	-1017783.751	-1086798.14	-983221.4164
192	-667890.2358	-858610.9386	-835883.943	-793562.0997	-705485.469	-801300.796	-1006937.052	-876781.014	-806021.8866	-678995.5421	-709778.6865	-918665.459	-820994.0007	-764527.2688	-640941.0998	-570648.4961	-783440.9937	-784027.9581	-763701.2376	-647870.9357	-783548.7987	-922743.4496	-885089.3133	-839268.9991	-727457.4643	-876524.0352	-1077084.082	-945612.4318	-875234.1052	-745292.9145	-783180.3188	-987545.0234	-889521.5554	-833394.0073	-706860.4543	-638454.3555	-847731.8896	-847713.2039	-826881.3367	-707940.9511	-899207.3731	-986875.9606	-934294.624	-884975.836	-749429.46	-951747.212	-1147231.05	-1014443.849	-944446.3239
193	-663434.4906	-854016.9173	-834327.4296	-793892.3859	-705946.9003	-793478.8894	-999381.9559	-875124.6592	-806436.2651	-679556.2807	-703758.2922	-912877.4612	-819908.2872	-765075.6997	-641567.5058	-569475.1187	-782262.5617	-784195.5295	-764325.7506	-648434.6439	-778884.4331	-918408.12	-883755.7779	-839311.7129	-727704.5329	-868637.9416	-1069531.445	-943958.0536	-875600.3807	-745810.3098	-777141.1958	-981777.1797	-888424.3591	-833885.3591	-707435.5761	-637252.4805	-846529.8196	-847835.8313	-827444.2457	-708452.0795	-894334.3867	-982799.3227	-933184.0664	-884730.9774	-749462.1658	-943796.9314	-1139680.871	-1012791.448	-944764.4964
194	-532959.5445	-726196.0322	-789596.6072	-860095.7293	-803674.9848	-559036.5945	-775944.8361	-830146.0468	-922615.2125	-839378.429	-522895.9856	-741847.8078	-793004.6137	-866883.6206	-774360.31	-532791.2737	-747937.1848	-791177.6582	-808556.2501	-695567.0207	-639931.8733	-794433.9611	-851664.6862	-901295.8965	-816451.1229	-632732.1841	-846603.9532	-900465.306	-992023.9234	-904970.079	-596032.4532	-811620.1854	-862037.1249	-934456.4648	-838256.5341	-599808.2374	-811510.9228	-853590.9625	-869577.5925	-753524.9727	-746904.2024	-862671.8901	-913732.7025	-942495.9977	-829227.2609	-706427.7109	-917263.0079	-970784.5651	-1061432.634
195	-531707.6763	-743206.3623	-829360.7799	-819699.5088	-719948.5704	-563874.8283	-827719.3264	-888975.0595	-833527.7861	-693405.9617	-526793.0047	-782897.2245	-836720.2024	-791700.3917	-656684.9771	-531778.8464	-757500.403	-801400.7972	-783279.6211	-661756.9236	-645850.0254	-819391.0156	-880812.2248	-852929.819	-736045.5801	-638109.92	-898775.5122	-957737.3373	-901144.0492	-758654.4294	-600349.2651	-852766.4042	-904583.1099	-858773.9813	-721354.7988	-599113.4519	-821249.3927	-863697.624	-844758.1803	-720530.6823	-759992.3745	-895575.6706	-932263.6041	-886160.0683	-752142.59	-712344.9492	-969831.6386	-1026499.609	-968760.3123
196	-532273.2041	-711188.3314	-854206.7031	-921907.5229	-766126.451	-554448.6849	-781468.5023	-966176.3772	-1002112.542	-740759.4016	-517576.0262	-746802.8974	-900575.6962	-925548.415	-692144.793	-527509.4128	-744635.6898	-818682.0293	-821327.157	-667040.1133	-641746.1673	-797945.4252	-922705.9978	-945995.092	-770882.4668	-628831.0797	-854046.8024	-1037552.909	-1069588.358	-805096.6237	-591414.3754	-817967.1233	-969795.3956	-991714.536	-756043.1332	-595163.6386	-808977.8885	-881292.6929	-882370.7077	-725742.4098	-751219.1306	-884702.519	-991205.2301	-970082.5986	-775638.4849	-703213.4131	-926625.0402	-1108929.451	-1137064.192
197	-533366.1357	-724562.1178	-789479.015	-842750.2663	-777837.9677	-561403.7372	-777309.8459	-829217.9817	-890709.0884	-795404.0181	-524845.3196	-742848.6239	-791606.329	-840569.3371	-739247.797	-533610.334	-747988.9876	-790526.7357	-800553.0064	-686135.1403	-641083.0212	-793918.4233	-849655.1703	-882689.7348	-791462.0184	-634977.7391	-847834.6939	-899099.6784	-959615.8342	-860813.7602	-597891.0003	-812532.635	-860378.7169	-908014.2749	-803292.6963	-600607.2084	-811565.2944	-852916.8599	-861669.7884	-744257.1081	-748799.907	-863274.7289	-909831.2628	-922629.1385	-805086.0691	-708551.6782	-918359.4795	-968981.375	-1028522.58
198	-571442.8947	-759170.5248	-802192.2553	-800711.3476	-715473.4328	-631990.8253	-843402.3623	-840928.1959	-814991.363	-691133.0723	-579463.5552	-793380.6927	-797493.065	-776398.3919	-654500.0422	-545250.0208	-757933.1082	-787655.1435	-777219.2034	-660072.7461	-682585.7412	-828902.5772	-856224.1204	-840193.5652	-732805.4143	-705824.6976	-913602.6104	-909802.4001	-883162.3627	-756492.2554	-652459.7938	-862696.5052	-865772.0682	-844029.6176	-719309.3194	-612439.0333	-821712.3468	-850367.5503	-839065.848	-719004.6398	-793728.5909	-898634.6296	-910255.9237	-879675.7202	-750137.3959	-779658.5073	-983802.796	-978676.6043	-951333.3625
199	-524768.7216	-803318.8463	-937368.0832	-863372.4373	-721636.2017	-556099.7915	-955015.146	-1055389.528	-874098.9612	-686941.2538	-520155.5657	-884538.9762	-966606.2046	-820562.9936	-648510.5062	-521861.264	-782772.597	-834620.4647	-785573.5296	-653641.83	-651660.4701	-891059.0908	-976875.4644	-886234.9598	-739219.7539	-632854.187	-1028318.84	-1123806.355	-941301.9742	-752864.208	-595638.5579	-955444.7111	-1033607.32	-887416.8987	-713955.641	-590226.8449	-846970.4898	-896807.5351	-847443.8436	-713169.7148	-778552.2186	-978799.341	-1016382.772	-909097.4257	-756803.3065	-709608.52	-1101622.483	-1192223.159	-1008504.987
200	-533344.032	-716332.0333	-819646.3958	-858926.4851	-741237.973	-560997.8028	-780901.0616	-892231.6122	-904449.0265	-716857.2057	-523789.0654	-745905.5309	-840947.6901	-848670.3196	-674904.9336	-531739.9638	-746481.1795	-802926.6458	-800642.1212	-665834.8175	-642779.8923	-795183.2107	-881441.4133	-889924.954	-751730.6887	-634803.9074	-852225.7439	-962286.3064	-972081.2071	-781545.6609	-597096.5796	-816176.2369	-909616.2616	-915362.406	-739060.2586	-599020.4515	-810419.2121	-865392.1223	-861839.5522	-724426.0541	-752215.7525	-874034.3881	-943236.3682	-920923.3604	-762223.4056	-708609.95	-923550.3638	-1032341.005	-1039713.396
201	-613816.0412	-802858.647	-816994.3515	-797570.3991	-711085.3237	-706375.4181	-915249.6448	-856679.7625	-811050.7158	-685800.5734	-636716.1667	-848423.2652	-807817.9592	-771182.9362	-648543.0604	-556408.5795	-769139.7351	-786061.577	-771280.2243	-654712.0063	-726942.8213	-870130.5985	-868905.7458	-839787.3666	-730455.8476	-780819.6945	-985426.5122	-925535.1689	-879679.1644	-751571.9402	-709890.5109	-917547.4165	-876206.161	-839356.9717	-713840.0387	-623868.5973	-833143.7651	-849201.3905	-833712.7084	-714143.9221	-840069.6081	-937402.5501	-920817.0792	-882004.2715	-749826.3716	-855263.9083	-1055603.317	-994390.5753	-948307.613
202	-593840.4541	-782263.1528	-810016.3339	-799051.1079	-713153.9701	-671308.9659	-881379.3337	-849254.1447	-812908.4193	-688314.4248	-609726.0887	-822475.0458	-802950.5882	-773641.611	-651351.3062	-551148.2017	-763856.6969	-786812.8175	-774079.9832	-657239.1711	-706031.9664	-850694.8473	-862927.3624	-839978.8571	-731563.4825	-745465.485	-951567.2233	-918118.4128	-881321.2169	-753891.4797	-682816.4701	-891689.5501	-871287.3115	-841559.7546	-716418.372	-618480.4619	-827754.7555	-849751.1426	-836236.2903	-716435.366	-818223.4837	-919126.5418	-915838.3297	-880906.5438	-749972.995	-819621.9416	-1021755.05	-986982.6808	-949734.0146
203	-527934.911	-775890.0022	-888085.2173	-843444.8304	-720866.1491	-559647.4784	-896931.0849	-979455.9412	-855586.6595	-689891.0481	-523184.1758	-838160.6605	-907340.264	-807393.2199	-652240.4517	-526386.5773	-771241.0977	-819462.5969	-784526.8376	-657344.6821	-649009.2108	-858357.5232	-933042.579	-871038.0913	-737771.4039	-635252.3358	-969209.259	-1048030.395	-922978.2352	-755506.2395	-597788.0158	-908593.4235	-974734.6081	-874347.3653	-717331.8173	-594281.7323	-835234.1596	-881699.7483	-846218.3969	-716528.4652	-770083.5107	-940825.048	-977999.8704	-898631.2936	-754676.659	-710857.1307	-1041487.378	-1116604.833	-990369.8109
204	-532398.8843	-728449.0831	-789758.7584	-884013.8792	-839302.379	-555772.4744	-774062.5855	-831425.782	-966611.4701	-900015.9887	-520207.9936	-740467.7542	-794932.7481	-903169.1307	-822777.9479	-531661.8481	-747865.7525	-792075.2338	-819592.1494	-708572.9075	-638344.5228	-795144.8507	-854435.6647	-926952.4593	-850909.3063	-629635.7248	-844906.8501	-902348.4086	-1036712.355	-965858.4765	-593469.6501	-810361.9829	-864323.9507	-970918.3488	-886469.1594	-598706.5137	-811435.9481	-854520.5017	-880481.8873	-766304.6934	-744290.1618	-861840.6186	-919112.5081	-969890.9721	-862516.2335	-703498.9122	-915751.0522	-973271.0349	-1106813.24
205	-533069.4842	-715013.2481	-828507.2556	-875074.0889	-747619.0886	-559318.6854	-781046.5468	-911190.1878	-929488.8133	-722985.45	-522196.1146	-746135.6052	-856235.6156	-868380.9669	-679325.0326	-530655.2999	-746008.0174	-806966.1425	-805945.5232	-666143.8413	-642514.8572	-795891.4103	-892021.1716	-904300.6837	-756640.9813	-633272.544	-852692.6421	-981583.7858	-997080.9037	-787583.8531	-595639.7287	-816635.3993	-925045.4899	-934938.2019	-743414.4696	-598031.6097	-810049.6735	-869468.8432	-867103.5011	-724763.5524	-751960.2303	-876769.5725	-955535.0251	-933527.2159	-765662.8755	-707226.3409	-924338.675	-1051977.39	-1064673.005
206	-532160.204	-710645.5378	-857853.7097	-928553.6519	-768752.8294	-553757.5835	-781528.3819	-973979.4632	-1012418.57	-743281.7017	-516920.3898	-746897.5928	-906867.9937	-933661.0432	-693964.0442	-527062.9802	-744440.9428	-820344.6299	-823509.9634	-667167.3032	-641637.0826	-798236.9103	-927060.4792	-951911.9423	-772903.4749	-628200.7918	-854238.9712	-1045495.483	-1079877.885	-807581.8596	-590814.7558	-818156.1081	-976145.8513	-999771.6613	-757835.2659	-594756.645	-808825.7916	-882970.6146	-884537.2758	-725881.3194	-751113.9612	-885828.2828	-996267.1861	-975270.1702	-777054.1228	-702643.9388	-926949.4981	-1117011.513	-1147337.22
207	-638380.3897	-828185.3067	-825575.3486	-795749.5442	-708541.4711	-749497.2821	-956900.5919	-865811.1819	-808766.2636	-682709.2437	-669906.3642	-880332.2699	-813803.4552	-768159.4583	-645089.7087	-562877.3633	-775636.3848	-785137.7625	-767837.309	-651604.305	-752657.2858	-894031.1008	-876257.4742	-839551.8872	-729093.7685	-824295.4188	-1027063.905	-934655.6909	-877659.9021	-748719.5597	-743183.9588	-949345.3124	-882254.961	-836648.1688	-710669.4146	-630494.487	-839770.7297	-848525.3502	-830609.413	-711326.0911	-866934.1907	-959876.8949	-926939.5395	-883354.1677	-749646.0661	-899093.4931	-1097227.156	-1003500.2	-946553.5406
208	-527931.7892	-775917.0458	-888133.808	-843464.4781	-720866.9083	-559643.9806	-896988.3531	-979530.8082	-855604.9118	-689888.1397	-523181.1898	-838206.3873	-907398.6974	-807406.2047	-652236.7742	-526382.1155	-771252.4672	-819477.5419	-784527.8695	-657341.0312	-649011.8248	-858389.7654	-933085.7962	-871053.0747	-737772.8319	-635249.9713	-969267.5383	-1048105.106	-922996.3016	-755503.6346	-597785.8966	-908639.6167	-974792.6538	-874360.2513	-717328.4886	-594277.7344	-835245.7311	-881714.6439	-846219.6052	-716525.1536	-770091.8605	-940862.4889	-978037.7142	-898641.6127	-754678.7558	-710855.8996	-1041546.669	-1116679.389	-990387.6914
209	-533373.8738	-724531.0219	-789476.7771	-842420.1553	-777346.2494	-561448.7876	-777335.8241	-829200.3192	-890101.8656	-794567.1172	-524882.4185	-742867.671	-791579.7175	-840068.5357	-738579.5517	-533625.922	-747989.9734	-790514.3476	-800400.6923	-685955.6371	-641104.9294	-793908.6118	-849616.9261	-882335.6308	-790986.4372	-635020.4755	-847858.1168	-899073.6884	-958999.0582	-859973.3973	-597926.3713	-812550.0003	-860347.1548	-907511.0392	-802627.2805	-600622.414	-811566.3292	-852904.0306	-861519.2907	-744080.7264	-748835.9851	-863286.2019	-909757.0124	-922251.0415	-804626.625	-708592.1006	-918380.347	-968947.0575	-1027896.251
210	-531258.5576	-747097.0987	-836351.4733	-822526.2071	-720057.8011	-563371.5948	-835958.4549	-899746.1138	-836153.7256	-692987.5382	-526363.4013	-789475.9123	-845126.9786	-793568.5024	-656155.8905	-531136.9381	-759136.1272	-803550.9158	-783428.0926	-661231.6801	-646226.1022	-824029.6792	-887029.8475	-855085.4698	-736251.0262	-637769.7466	-907160.109	-968486.0326	-903743.2414	-758279.6616	-600044.368	-859412.1823	-912934.1072	-860627.8731	-720875.8937	-598538.2728	-822914.1718	-865840.6387	-844932.0078	-720054.249	-761193.6468	-900962.2616	-937708.1555	-887644.6719	-752444.2515	-712167.8359	-978361.7044	-1037225.944	-971332.7572
211	-635901.9588	-825629.962	-824709.5651	-795933.2602	-708798.1342	-745146.4823	-952698.2009	-864889.8632	-808996.7544	-683021.1448	-666557.6244	-877112.7965	-813199.5459	-768464.5134	-645438.1362	-562224.6925	-774980.9025	-785230.9712	-768184.6835	-651917.8579	-750062.8133	-891619.6489	-875515.7182	-839575.646	-729231.196	-819908.9161	-1022862.882	-933735.4718	-877863.6365	-749007.352	-739824.8015	-946137.0494	-881644.6646	-836921.4747	-710989.3161	-629825.9649	-839102.0991	-848593.5596	-830922.5214	-711610.3974	-864223.6766	-957609.3358	-926321.8111	-883217.9693	-749664.2581	-894671.2875	-1093027.5	-1002581.08	-946730.5185
212	-572214.2496	-759965.8173	-802461.7106	-800654.1702	-715393.5523	-633344.9122	-844710.2603	-841214.9352	-814919.628	-691036.0002	-580505.7738	-794382.6801	-797681.0179	-776303.4505	-654391.6022	-545453.1497	-758137.112	-787626.1344	-777111.091	-659975.16	-683393.2114	-829653.0864	-856454.9749	-840186.1708	-732762.6432	-707189.8961	-914910.0828	-910088.7972	-883098.9551	-756402.6867	-653505.2546	-863695.0036	-865962.009	-843944.5574	-719209.7574	-612647.0955	-821920.4427	-850346.3216	-838968.4002	-718916.156	-794572.1764	-899340.3555	-910448.1776	-879718.1089	-750131.7341	-781034.8176	-985109.8428	-978962.6592	-951278.2822
213	-623668.1195	-813016.4671	-820435.9512	-796840.1048	-710065.055	-723670.4007	-931954.6835	-860342.1213	-810134.4855	-684560.7269	-650027.8336	-861221.0812	-810218.5755	-769970.3031	-647158.0169	-559003.0291	-771745.361	-785691.0606	-769899.3665	-653465.5936	-737256.1791	-879716.4265	-871854.3199	-839692.9223	-729909.5554	-798256.6006	-1002126.115	-929193.1571	-878869.2944	-750427.9296	-723243.5886	-930300.6698	-878632.1667	-838270.546	-712568.3894	-626526.0577	-835801.6566	-848930.2495	-832468.0628	-713013.7683	-850844.2464	-946416.3859	-923272.6281	-882545.6774	-749754.056	-872842.7381	-1072297.483	-998044.1928	-947604.1032
214	-525396.8025	-797877.753	-927591.7808	-859419.3735	-721483.4454	-556803.5505	-943492.9397	-1040326.489	-870426.6533	-687526.4081	-520756.3548	-875338.8529	-954849.5474	-817950.4894	-649250.4201	-522758.9559	-780485.0794	-831613.5799	-785365.896	-654376.3693	-651134.5366	-884572.0408	-968180.2813	-883220.3384	-738932.443	-633329.9107	-1016593.2	-1108774.585	-937667.0717	-753388.311	-596064.9485	-946150.7638	-1021928.668	-884824.2794	-714625.3772	-591031.2178	-844642.3396	-893810.585	-847200.7502	-713835.9943	-776872.2707	-971266.334	-1008768.708	-907021.2463	-756381.4409	-709856.2085	-1089693.409	-1177222.659	-1004907.49
215	-620807.3454	-810066.9139	-819436.6048	-797052.1623	-710361.3132	-718648.4106	-927103.997	-859278.6724	-810400.5337	-684920.7444	-646162.4895	-857504.9453	-809521.5021	-770322.4186	-647560.1957	-558249.6719	-770988.7585	-785798.6484	-770300.3299	-653827.5178	-734261.462	-876932.9642	-870998.1346	-839720.3464	-730068.1837	-793193.3998	-997277.0067	-928130.9773	-879104.4585	-750760.119	-719366.2199	-926597.4738	-877927.721	-838586.0143	-712937.6416	-625754.4039	-835029.8776	-849008.9814	-832829.4738	-713341.934	-847715.5861	-943799.0144	-922559.6038	-882388.4679	-749775.0545	-867738.3266	-1067449.954	-996983.2822	-947808.3832
216	-531914.3978	-709464.8122	-865786.9532	-943010.8123	-774465.9255	-552254.2477	-781658.6367	-990953.3234	-1034837.018	-748768.3989	-515494.2002	-747103.5813	-920555.473	-951308.243	-697921.4165	-526091.8664	-744017.3147	-823961.2439	-828258.1685	-667443.9763	-641399.7933	-798870.9706	-936532.6749	-964782.7207	-777299.7239	-626829.7422	-854656.9912	-1062772.769	-1102260.44	-812987.932	-589510.4182	-818567.2022	-989959.8408	-1017298.127	-761733.6479	-593871.322	-808494.9389	-886620.556	-889250.158	-726183.486	-750885.1888	-888277.129	-1007278.334	-986554.5666	-780133.5251	-701405.1755	-927655.2834	-1134592.225	-1169683.884
217	-532635.178	-712927.0664	-842524.2186	-900617.9265	-757713.3529	-556662.4953	-781276.6893	-941180.6918	-969099.1638	-732679.6982	-519676.2313	-746499.5589	-880419.5313	-899561.1705	-686317.1715	-528939.4738	-745259.5241	-813356.2079	-814334.9561	-666632.685	-642095.5993	-797011.7087	-908757.2542	-927041.5998	-764408.5559	-630850.0856	-853431.2267	-1012110.401	-1036627.836	-797135.6483	-593335.1414	-817361.7467	-949452.9319	-965905.0846	-750302.3808	-596467.3642	-809465.1018	-875917.7937	-875430.5233	-725297.4397	-751556.0206	-881096.351	-974990.2272	-953465.2106	-771103.7609	-705037.6144	-925585.7017	-1083040.117	-1104156.523
218	-612371.9511	-801369.7421	-816489.8914	-797677.4436	-711234.8719	-703840.3678	-912801.0668	-856142.9441	-811185.0143	-685982.3066	-634764.9797	-846547.397	-807466.0835	-771360.6805	-648746.0762	-556028.2923	-768757.8097	-786115.8862	-771482.6265	-654894.702	-725431.118	-868725.5346	-868473.552	-839801.21	-730535.9215	-778263.8413	-982978.731	-924998.9912	-879797.8729	-751739.6261	-707933.2539	-915678.0802	-875850.5638	-839516.2169	-714026.4335	-623479.0742	-832754.1787	-849241.1336	-833895.1451	-714309.5769	-838490.2916	-936081.3271	-920457.1517	-881924.9138	-749836.9714	-852687.2524	-1053156.333	-993855.0382	-948410.7315
219	-611469.5937	-800439.3817	-816174.6734	-797744.3317	-711328.3188	-702256.3107	-911271.043	-855807.5067	-811268.9324	-686095.8648	-633545.7567	-845375.2379	-807246.2097	-771471.7463	-648872.9332	-555790.6653	-768519.159	-786149.822	-771609.1001	-655008.8616	-724486.5118	-867847.5633	-868203.4904	-839809.8602	-730585.9567	-776666.7854	-981449.2051	-924663.954	-879872.0494	-751844.4067	-706710.2381	-914510.0026	-875628.3646	-839615.7233	-714142.9046	-623235.6759	-832510.741	-849265.9675	-834009.1428	-714413.0883	-837503.4365	-935255.7449	-920232.2466	-881875.3261	-749843.5948	-851077.1977	-1051627.305	-993520.4013	-948475.1663
220	-533667.2517	-723352.0628	-789391.9278	-829904.45	-758703.4209	-563156.8113	-778320.7537	-828530.6692	-867079.8426	-762837.1618	-526288.9702	-743589.8148	-790570.7782	-821081.3333	-713243.9429	-534216.9191	-748027.352	-790044.6712	-794625.9119	-679150.0168	-641935.5459	-793536.6229	-848166.9498	-868910.2621	-772955.4243	-636640.7669	-848746.1639	-898088.313	-935614.8398	-828112.1854	-599267.4152	-813208.3828	-859150.5222	-888431.5452	-777398.9491	-601198.9155	-811605.5613	-852417.6285	-855813.3752	-737393.4525	-750203.8402	-863721.1832	-906941.9092	-907916.0101	-787207.4277	-710124.6598	-919171.5116	-967645.9568	-1004149.837
221	-532028.2997	-710011.9377	-862110.8408	-936311.6424	-771818.5867	-552950.8646	-781598.2791	-983087.9631	-1024448.741	-746225.969	-516155.069	-747008.1302	-914212.9584	-943130.8701	-696087.6463	-526541.8619	-744213.6158	-822285.3746	-826057.9416	-667315.7713	-641509.7486	-798577.1593	-932143.4417	-958818.6496	-775262.5867	-627465.0602	-854463.2888	-1054766.807	-1091888.795	-810482.8621	-590114.8232	-818376.7091	-983558.7038	-1009176.7	-759927.2127	-594281.5637	-808648.2497	-884929.2434	-887066.2991	-726043.4678	-750991.1975	-887142.3808	-1002175.98	-981325.5944	-778706.5894	-701979.1946	-927328.2361	-1126445.661	-1159328.87
222	-532746.6632	-727051.5103	-789658.1757	-869177.3937	-817202.6213	-557797.2159	-775230.15	-830631.9592	-939320.4864	-862402.3655	-521875.3615	-741323.8048	-793736.7217	-880661.1421	-792744.3714	-532362.4335	-747910.0622	-791518.4655	-812746.5547	-700505.3249	-639329.1601	-794703.8842	-852716.8201	-911037.6321	-829534.8128	-631556.4659	-845959.5672	-901180.3156	-1008992.014	-928089.258	-595059.363	-811142.4489	-862905.4272	-948300.955	-856562.7527	-599389.9156	-811482.4551	-853943.9063	-873717.9272	-758377.4021	-745911.6574	-862356.2583	-915775.4019	-952897.804	-841867.0043	-705315.653	-916688.9219	-971728.6717	-1078663.542
223	-666106.0014	-856771.3337	-835260.6613	-793694.3577	-705670.242	-798168.6342	-1003911.73	-876117.7523	-806187.8181	-679220.0812	-707367.9125	-916347.7446	-820559.2435	-764746.8795	-641191.9344	-570178.6353	-782969.1088	-784095.0595	-763951.3142	-648096.6639	-781681.0255	-921007.4338	-884555.3196	-839286.1032	-727556.3991	-873366.1708	-1074059.745	-944949.9616	-875380.7746	-745500.0975	-780762.0452	-985235.3794	-889082.2001	-833590.7616	-707090.753	-637973.0832	-847250.5392	-847762.3081	-827106.7449	-708145.6246	-897256.0609	-985243.5339	-933849.9183	-884877.7862	-749442.5565	-948563.6448	-1144207.697	-1013782.171	-944573.7311
224	-533679.1604	-723304.2072	-789388.4837	-829396.4202	-757946.6826	-563226.1423	-778360.7334	-828503.4872	-866145.3468	-761549.1988	-526346.0641	-743619.1276	-790529.824	-820310.6164	-712215.5354	-534240.9085	-748028.8692	-790025.6064	-794391.5056	-678873.7672	-641969.2618	-793521.5234	-848108.0933	-868365.3078	-772223.5204	-636706.5367	-848782.2109	-898048.3153	-934665.642	-826818.8946	-599321.85	-813235.1075	-859101.9492	-887657.0821	-776374.8961	-601222.3165	-811607.1538	-852397.8848	-855581.7642	-737122.0068	-750259.3633	-863738.8397	-906827.6402	-907334.1313	-786500.3583	-710186.8685	-919203.626	-967593.1433	-1003185.937
225	-524557.5499	-805148.2365	-940655.0459	-864701.526	-721687.561	-555863.1755	-958889.1119	-1060453.983	-875333.6549	-686744.5147	-519953.5699	-887632.2175	-970558.997	-821441.3628	-648261.7343	-521559.4444	-783541.7002	-835631.4316	-785643.3396	-653394.8651	-651837.2981	-893240.1497	-979798.9361	-887248.5279	-739316.3529	-632694.2404	-1032261.204	-1128860.297	-942524.0916	-752687.9954	-595495.198	-958569.4976	-1037533.885	-888288.5823	-713730.464	-589956.4007	-847753.2544	-897815.1618	-847525.5758	-712945.7001	-779117.0463	-981332.0689	-1018942.752	-909795.4733	-756945.1451	-709525.2429	-1105633.245	-1197266.588	-1009714.528
226	-527163.4036	-782573.6056	-900094.0037	-848300.6027	-721053.7883	-558783.0114	-911084.4639	-997958.7251	-860097.5635	-689172.2699	-522446.1925	-849461.6933	-921781.6323	-810602.3068	-651331.5736	-525283.8914	-774050.9852	-823156.1239	-784781.8857	-656442.4058	-649655.2448	-866325.9343	-943723.3652	-874741.1216	-738124.3243	-634667.9774	-983612.5271	-1066494.77	-927443.192	-754862.4541	-597264.2561	-920009.7057	-989080.158	-877532.0266	-716509.1423	-593293.6754	-838093.9584	-885381.0721	-846517.0023	-715710.0364	-772147.086	-950078.2674	-987352.6556	-901181.5824	-755194.8605	-710552.881	-1056140.536	-1135030.797	-994788.8205
227	-532899.3179	-714195.8576	-833999.2664	-885082.4644	-751574.1399	-558277.9589	-781136.7193	-922940.8195	-945008.6138	-726783.7703	-521208.7947	-746278.2065	-865711.1578	-880597.7368	-682064.6347	-529983.019	-745714.7489	-809469.8452	-809232.6015	-666335.376	-642350.5871	-796330.3564	-898578.5653	-913210.8416	-759684.4083	-632323.3964	-852982.0282	-993544.472	-1012575.856	-791326.3586	-594736.7643	-816919.9907	-934608.6123	-947071.3902	-746113.2341	-597418.7199	-809820.6314	-871995.6177	-870366.1262	-724972.7357	-751801.8562	-878464.8551	-963157.8018	-941339.1564	-767794.6783	-706368.7721	-924827.2747	-1064148.131	-1080143.111
228	-533072.1479	-725743.5279	-789564.0407	-855291.9913	-796519.5539	-559692.1627	-776322.8686	-829889.0238	-913778.9732	-827199.9388	-523435.8437	-742124.9788	-792617.3659	-859596.0132	-764636.0775	-533018.1083	-747951.5313	-790997.3885	-806339.7924	-692954.9093	-640250.6779	-794291.1855	-851108.161	-896143.0143	-809530.5171	-633354.0792	-846944.8006	-900087.1024	-983048.6674	-892741.2103	-596547.1684	-811872.8837	-861577.8372	-927133.4343	-828573.4765	-600029.5084	-811525.9807	-853404.2732	-867387.5662	-750958.2846	-747429.2082	-862838.8433	-912652.2186	-936993.9717	-822541.4802	-707015.9329	-917566.6701	-970285.1807	-1052318.362
229	-532641.2042	-727475.304	-789688.6759	-873676.3436	-823904.0536	-557183.2423	-774876.103	-830872.6745	-947596.083	-873808.1534	-521369.7562	-741064.2198	-794099.3994	-887486.3645	-801851.6196	-532149.9911	-747896.6259	-791687.2975	-814822.3824	-702951.7028	-639030.5831	-794837.6009	-853238.0349	-915863.5735	-836016.3192	-630974.029	-845640.346	-901534.5229	-1017397.807	-939542.2279	-594577.3056	-810905.7839	-863335.574	-955159.3529	-865631.4385	-599182.6838	-811468.3525	-854118.7506	-875769.0004	-760781.2387	-745419.9623	-862199.898	-916787.3311	-958050.7368	-848128.5848	-704764.7526	-916404.5265	-972196.3711	-1087199.531
230	-532712.7007	-727187.9908	-789667.9981	-870626.2565	-819360.7817	-557599.489	-775116.1311	-830709.4802	-941985.5981	-866075.5386	-521712.534	-741240.2068	-793853.5201	-882859.1685	-795677.3121	-532294.0176	-747905.7351	-791572.8369	-813415.064	-701293.1678	-639233.005	-794746.9469	-852884.6746	-912591.8007	-831622.1473	-631368.8952	-845856.7637	-901294.3861	-1011699.055	-931777.6258	-594904.119	-811066.2322	-863043.9537	-950509.6654	-859483.2746	-599323.1777	-811477.9134	-854000.214	-874378.4643	-759151.5448	-745753.3096	-862305.9033	-916101.2883	-954557.2785	-843883.5128	-705138.2385	-916597.3339	-971879.2918	-1081412.511
231	-653136.0992	-843398.9335	-830729.9206	-794655.7636	-707013.3886	-775400.4196	-981920.1554	-871296.3903	-807394.002	-680852.294	-689843.588	-899499.886	-817398.9196	-766343.2667	-643015.2937	-566763.1368	-779538.8973	-784582.8307	-765769.1631	-649737.5208	-768103.8655	-908388.0404	-880673.6291	-839410.4356	-728275.5728	-850411.1189	-1052075.327	-940134.3533	-876446.939	-747006.1458	-763183.2047	-968446.1859	-885888.4518	-835021.0013	-708764.8329	-634474.6334	-843751.5218	-848119.2554	-828745.2755	-709633.4309	-883071.642	-973377.1473	-930617.2777	-884165.0451	-749537.7573	-925421.7558	-1122230.436	-1008972.316	-945499.8761
232	-529552.6954	-761875.0607	-862903.8252	-833262.6937	-720472.6858	-561460.1915	-867252.6664	-940657.1947	-846127.6819	-691398.2642	-524731.6634	-814463.3666	-877057.9566	-800664.0407	-654146.291	-528698.8147	-765349.0051	-811717.5885	-783992.0236	-659236.6778	-647654.5331	-841648.4503	-910645.8888	-863273.1552	-737031.3603	-636477.6851	-939006.8446	-1009312.188	-913615.6049	-756856.2023	-598886.2949	-884654.4617	-944653.2236	-867669.4046	-719056.896	-596353.6028	-829237.4074	-873980.3291	-845592.2472	-718244.64	-765756.3708	-921421.8427	-958387.8842	-893283.5571	-753590.035	-711495.1162	-1010760.966	-1077967.171	-981103.5279
233	-583974.5684	-772091.0968	-806569.9108	-799782.4258	-714175.6687	-653989.7449	-864650.8834	-845586.6531	-813825.9337	-689556.0089	-596395.7659	-809659.294	-800546.6075	-774855.9436	-652738.2908	-548550.116	-761247.4193	-787183.8531	-775462.7761	-658487.3306	-695704.1546	-841095.5851	-859974.6559	-840073.4337	-732110.5402	-728004.1415	-934844.2168	-914455.298	-882132.222	-755037.0936	-669444.6784	-878918.4235	-868857.9057	-842647.7029	-717691.8035	-615819.2771	-825093.139	-850022.6636	-837482.6803	-717567.1037	-807433.7451	-910100.0733	-913379.3395	-880364.3792	-750045.4118	-802018.4756	-1005037.488	-983323.9428	-950438.5103
234	-527558.6988	-779149.1454	-893941.0936	-845812.6635	-720957.6481	-559225.936	-903832.7346	-988478.5027	-857786.3236	-689540.5484	-522824.3111	-843671.4131	-914382.3467	-808958.0755	-651797.2531	-525848.8716	-772611.2906	-821263.6813	-784651.2073	-656904.7027	-649324.2381	-862243.1806	-938250.8791	-872843.8098	-737943.4994	-634967.3836	-976232.7628	-1057034.227	-925155.4939	-755192.3087	-597532.6135	-914160.3755	-981729.9666	-875900.3101	-716930.6541	-593799.9235	-836628.6909	-883494.882	-846364.0067	-716129.3726	-771089.7774	-945337.2199	-982560.5938	-899874.8977	-754929.351	-710708.7686	-1048632.737	-1125589.935	-992524.6643
235	-532887.4848	-726485.609	-789617.448	-863169.8456	-808254.0494	-558617.0685	-775702.917	-830310.5267	-928269.8979	-847171.9628	-522550.5073	-741670.4344	-793252.4301	-871547.2705	-780583.2599	-532646.1125	-747928.0039	-791293.0205	-809974.6557	-697238.6219	-639727.8567	-794525.3292	-852020.8304	-904593.4449	-820879.9129	-632334.207	-846385.8305	-900707.3346	-997767.5715	-912795.8521	-595703.0651	-811458.473	-862331.0426	-939142.7834	-844453.1344	-599666.6367	-811501.2865	-853710.4329	-870979.0834	-755167.5056	-746568.2289	-862565.0497	-914424.1502	-946016.9781	-833505.7763	-706051.2826	-917068.6815	-971104.1424	-1067265.245
236	-532705.9416	-713266.9779	-840240.3682	-896455.9475	-756068.6464	-557095.281	-781239.191	-936294.1964	-962645.261	-731100.1682	-520086.8079	-746440.2582	-876479.1308	-894480.8316	-685177.909	-529219.0415	-745381.4797	-812315.0442	-812968.0259	-666553.0354	-642163.911	-796829.1732	-906030.3646	-923336.3141	-763142.948	-631244.7883	-853310.8856	-1007136.554	-1030184.266	-795579.3288	-593710.6388	-817243.3994	-945476.1113	-960859.5031	-749180.1006	-596722.2341	-809560.3488	-874867.0355	-874073.762	-725210.4509	-751621.8804	-880391.3684	-971820.2986	-950216.6183	-770217.2516	-705394.234	-925382.5177	-1077978.919	-1097723.286
237	-636158.3427	-825894.3023	-824799.127	-795914.2555	-708771.5834	-745596.5554	-953132.9218	-864985.17	-808972.9111	-682988.8799	-666904.0383	-877445.8384	-813262.0179	-768432.9567	-645402.0928	-562292.2087	-775048.7095	-785221.3291	-768148.749	-651885.4221	-750331.2013	-891869.1041	-875592.45	-839573.1882	-729216.9797	-820362.6826	-1023297.461	-933830.6648	-877842.561	-748977.581	-740172.2931	-946468.9316	-881707.7973	-836893.2023	-710956.2236	-629895.1209	-839171.2663	-848586.5036	-830890.1316	-711580.987	-864504.0687	-957843.9059	-926385.7127	-883232.0585	-749662.3762	-895128.7473	-1093461.938	-1002676.16	-946712.2109
238	-531128.1703	-748226.6499	-838380.9982	-823346.8487	-720089.5127	-563225.497	-838350.423	-902873.1459	-836916.0834	-692866.0623	-526238.6797	-791385.8245	-847567.6179	-794110.8488	-656002.2871	-530950.5806	-759611.0075	-804175.1341	-783471.1966	-661079.1924	-646335.2841	-825376.3672	-888834.9359	-855711.2943	-736310.6709	-637670.9881	-909594.3093	-971606.5735	-904497.834	-758170.8597	-599955.8509	-861341.5719	-915358.5529	-861166.0915	-720736.8589	-598371.2879	-823397.4873	-866462.7946	-844982.4731	-719915.9319	-761542.3979	-902526.0865	-939288.8073	-888075.6792	-752531.8293	-712116.4166	-980838.1368	-1040339.993	-972079.5845
239	-531851.9525	-709164.8573	-867802.337	-946683.5506	-775917.2967	-551872.336	-781691.727	-995265.4112	-1040532.264	-750162.255	-515131.8869	-747155.9112	-924032.6792	-955791.3879	-698926.7586	-525845.1619	-743909.695	-824880.0189	-829464.416	-667514.2631	-641339.5116	-799032.0491	-938939.0185	-968052.4499	-778416.5596	-626481.4368	-854763.1862	-1067161.939	-1107946.568	-814361.306	-589179.0605	-818671.6377	-993469.186	-1021750.6	-762724.004	-593646.412	-808410.8881	-887547.7975	-890447.432	-726260.2493	-750827.0708	-888899.2409	-1010075.638	-989421.2868	-780915.8253	-701090.4766	-927834.5831	-1139058.479	-1175360.894
240	-532305.1556	-728825.7382	-789785.8662	-888012.41	-845258.4095	-555226.7932	-773747.9192	-831639.7224	-973966.5703	-910153.1083	-519758.627	-740237.043	-795255.085	-909235.1822	-830872.1949	-531473.0358	-747853.8108	-792225.2865	-821437.0823	-710747.1743	-638079.1566	-795263.6941	-854898.9046	-931241.6103	-856669.8733	-629118.0724	-844623.1359	-902663.2173	-1044183.17	-976037.5301	-593041.212	-810151.6421	-864706.2521	-977013.8856	-894529.1334	-598522.3324	-811423.4142	-854675.898	-882304.8192	-768441.1507	-743853.158	-861701.6503	-920011.8803	-974470.743	-868081.337	-703009.2886	-915498.2901	-973686.7119	-1114399.769
241	-525845.1435	-793993.7539	-920613.1926	-856597.5701	-721374.4039	-557305.9126	-935268.0783	-1029574.086	-867805.2609	-687944.107	-521185.2142	-868771.557	-946457.3287	-816085.6136	-649778.5905	-523399.7526	-778852.1876	-829467.1845	-785217.6816	-654900.7032	-650759.111	-879941.4097	-961973.4252	-881068.4204	-738727.3527	-633669.4951	-1008223.122	-1098044.503	-935072.3803	-753762.4299	-596369.3176	-939516.4938	-1013592.131	-882973.5978	-715103.453	-591605.401	-842980.4433	-891671.2812	-847027.2236	-714311.6025	-775673.0786	-965889.0706	-1003333.585	-905539.2134	-756080.3018	-710033.0151	-1081178.114	-1166514.898	-1002339.5
242	-627946.8405	-817427.9707	-821930.6252	-796522.9406	-709621.9561	-731181.5475	-939209.6198	-861932.6702	-809736.57	-684022.2661	-655809.0411	-866779.1252	-811261.1542	-769443.6611	-646556.4977	-560129.789	-772876.9746	-785530.1468	-769299.6652	-652924.2812	-741735.2322	-883879.516	-873134.8748	-839651.9055	-729672.3028	-805829.3843	-1009378.69	-930781.8078	-878517.5708	-749931.09	-729042.7807	-935839.3604	-879685.772	-837798.7154	-712016.1168	-627680.1829	-836955.969	-848812.494	-831927.5178	-712522.9467	-855523.6319	-950331.0614	-924339.0638	-882780.808	-749722.6497	-880477.1586	-1079547.698	-999630.9454	-947298.5716
243	-528641.5246	-769768.5758	-877086.5243	-838997.4911	-720694.2927	-560439.2327	-883968.187	-962509.4793	-851455.1806	-690549.3678	-523860.0853	-827810.1898	-894113.6004	-804454.0585	-653072.8815	-527396.5131	-768667.5578	-816079.7431	-784293.2423	-658171.0653	-648417.5166	-851059.3578	-923260.1842	-867646.5334	-737448.1687	-635787.5422	-956017.491	-1031119.111	-918888.8387	-756095.8744	-598267.7206	-898137.3975	-961595.7033	-871430.575	-718085.2947	-595186.681	-832614.9066	-878328.0713	-845944.9082	-717278.0536	-768193.5086	-932350.1433	-969433.7747	-896295.5168	-754202.0449	-711135.7891	-1028066.739	-1099728.729	-986322.4969
244	-526694.4422	-786636.2406	-907393.5565	-851252.1887	-721167.8449	-558257.5442	-919687.6095	-1009205.661	-862839.521	-688735.3598	-521997.6086	-856331.0374	-930559.8325	-812552.9535	-650779.1111	-524613.6227	-775758.9782	-825401.238	-784936.9169	-655893.9563	-650047.9372	-871169.541	-950215.6918	-876992.0123	-738338.8472	-634312.7746	-992367.568	-1077718.359	-930157.2204	-754471.1284	-596945.8882	-926949.1042	-997800.1149	-879467.8261	-716009.0785	-592693.084	-839832.29	-887618.7684	-846698.5098	-715212.5537	-773401.4323	-955702.8461	-993037.7554	-902731.7781	-755509.8498	-710367.9425	-1065047.473	-1146231.038	-997474.9199
245	-532171.1433	-729364.2759	-789824.6245	-893729.4693	-853774.2824	-554446.5837	-773298.0124	-831945.6124	-984482.819	-924647.0607	-519116.1271	-739907.1743	-795715.9593	-917908.3619	-842445.2684	-531203.0737	-747836.7366	-792439.8304	-824074.949	-713855.9192	-637699.7386	-795433.6152	-855561.2405	-937374.1955	-864906.2744	-628377.9382	-844217.4841	-903113.3278	-1054864.866	-990591.4392	-592428.6355	-809850.899	-865252.8629	-985729.2233	-906053.2036	-598258.9919	-811405.4933	-854898.082	-884911.229	-771495.836	-743228.3344	-861502.9549	-921297.7936	-981018.8537	-876038.2665	-702309.2296	-915136.8934	-974281.0428	-1125246.913
246	-640437.5078	-830306.2638	-826293.9561	-795597.0584	-708328.4385	-753108.4818	-960388.6111	-866575.8839	-808574.9543	-682450.3633	-672685.8459	-883004.4593	-814304.7049	-767906.26	-644800.5111	-563419.0855	-776180.4406	-785060.3986	-767548.9853	-651344.0535	-754810.7193	-896032.6257	-876873.1377	-839532.1672	-728979.7024	-827936.2522	-1030550.789	-935419.4804	-877490.8009	-748480.6898	-745972.0871	-952008.1971	-882761.512	-836421.3227	-710403.8937	-631049.3658	-840325.6986	-848468.7358	-830349.5305	-711090.1145	-869183.9398	-961758.9877	-927452.2591	-883467.2134	-749630.9666	-902763.9602	-1100712.905	-1004263.077	-946406.6475
247	-531758.8008	-708717.4046	-870808.7518	-952162.2959	-778082.3553	-551302.6256	-781741.0889	-1001697.895	-1049028.052	-752241.5165	-514591.4122	-747233.9735	-929219.743	-962479.0438	-700426.4608	-525477.1446	-743749.1551	-826250.5859	-831263.8154	-667619.1122	-641249.5875	-799272.3352	-942528.641	-972930.0134	-780082.5803	-625961.8582	-854921.6008	-1073709.411	-1116428.753	-816410.0136	-588684.7633	-818827.4276	-998704.1927	-1028392.502	-764201.3509	-593310.9064	-808285.5068	-888930.9945	-892233.4453	-726374.7596	-750740.3743	-889827.2658	-1014248.468	-993697.6683	-782082.8083	-700621.0297	-928102.0504	-1145720.938	-1183829.478
248	-532047.2111	-740264.9571	-824075.8006	-817562.5189	-719865.9917	-564255.274	-821490.5275	-880832.1192	-831542.5701	-693722.2907	-527117.7857	-777923.7224	-830364.6615	-790288.096	-657084.9678	-532264.1304	-756263.792	-799775.3029	-783167.3763	-662154.0088	-645565.7106	-815884.176	-876111.6887	-851300.1424	-735890.2625	-638367.0919	-892436.7389	-949611.3005	-899179.0543	-758937.7547	-600579.7679	-847742.1817	-898269.738	-857372.4351	-721716.852	-599548.2885	-819990.8161	-862077.5002	-844626.7662	-720890.8668	-759084.2101	-891503.3962	-928147.5115	-885037.7047	-751914.5333	-712478.8473	-963382.8906	-1018390.476	-966815.5384
249	-532091.1436	-729685.7598	-789847.7616	-897142.3088	-858857.8937	-553980.832	-773029.4373	-832128.2156	-990760.569	-933299.3293	-518732.5822	-739710.2568	-795991.0814	-923085.8787	-849353.8975	-531041.9179	-747826.5441	-792567.9039	-825649.6424	-715711.7067	-637473.2423	-795535.0508	-855956.6266	-941035.0861	-869823.0531	-627936.1098	-843975.3274	-903382.0244	-1061241.381	-999279.4994	-592062.9536	-809671.3683	-865579.1661	-990931.9065	-912932.5798	-598101.7888	-811394.7953	-855030.7164	-886467.144	-773319.3523	-742855.3414	-861384.3422	-922065.4288	-984927.7953	-880788.2124	-701891.3244	-914921.1551	-974635.8329	-1131722.193
250	-525413.143	-797736.1938	-927337.4338	-859316.5279	-721479.4712	-556821.86	-943193.1701	-1039934.599	-870331.112	-687541.6318	-520771.9853	-875099.4963	-954543.6782	-817882.5208	-649269.6702	-522782.3109	-780425.5658	-831535.3507	-785360.4941	-654395.4795	-651120.8535	-884403.2693	-967954.0615	-883141.908	-738924.9681	-633342.2875	-1016288.138	-1108383.508	-937572.5036	-753401.9464	-596076.0418	-945908.9662	-1021624.828	-884756.828	-714642.8015	-591052.145	-844581.7689	-893732.6143	-847194.4257	-713853.3286	-776828.564	-971070.3502	-1008570.616	-906967.231	-756370.4653	-709862.6525	-1089383.054	-1176832.396	-1004813.895
251	-532927.8132	-726323.5466	-789605.7844	-861449.4088	-805691.3645	-558851.8573	-775838.3076	-830218.4751	-925105.2391	-842810.2921	-522743.8551	-741769.7019	-793113.739	-868937.2472	-777100.5705	-532727.3523	-747933.142	-791228.4577	-809180.8415	-696303.1061	-639842.0351	-794474.1948	-851821.5134	-902747.9637	-818401.3295	-632556.9359	-846507.9034	-900571.8827	-994553.1245	-908416.1386	-595887.408	-811548.9758	-862166.5509	-936520.0735	-840985.1916	-599745.8839	-811506.6795	-853643.571	-870194.7355	-754248.2579	-746756.2573	-862624.8432	-914037.1798	-944046.4526	-831111.2945	-706261.9516	-917177.4368	-970925.2901	-1064001.01
252	-531691.2832	-708393.0855	-872987.8381	-956133.3577	-779651.6162	-550889.6925	-781776.867	-1006360.239	-1055185.903	-753748.5907	-514199.6695	-747290.554	-932979.3905	-967326.3388	-701513.4633	-525210.4011	-743632.7938	-827243.9897	-832568.0422	-667695.1082	-641184.4094	-799446.4976	-945130.4434	-976465.3312	-781290.1326	-625585.2612	-855036.4217	-1078455.099	-1122576.746	-817894.9419	-588326.4907	-818940.3461	-1002498.59	-1033206.634	-765272.1501	-593067.7277	-808194.6289	-889933.5525	-893527.9697	-726457.7581	-750677.5355	-890499.9097	-1017272.986	-996797.2421	-782928.6519	-700280.7688	-928295.914	-1150549.97	-1189967.612
253	-533143.6147	-725456.3336	-789543.3714	-852243.1674	-791978.1637	-560108.237	-776562.7973	-829725.8972	-908170.8119	-819470.5265	-523778.4795	-742300.8929	-792371.5884	-854970.7336	-758464.3271	-533162.0751	-747960.6367	-790882.9754	-804933.0567	-691297.0612	-640453.0159	-794200.5691	-850754.947	-892872.5965	-805138.1651	-633748.7819	-847161.1288	-899847.0651	-977352.2754	-884979.824	-596873.8465	-812033.2656	-861286.3377	-922485.6725	-822427.8588	-600169.944	-811535.5376	-853285.7857	-865997.6061	-749329.2657	-747762.4175	-862944.8046	-911966.4599	-933501.9603	-818298.1664	-707389.264	-917759.3977	-969968.2328	-1046533.739
254	-615703.4541	-804804.6324	-817653.6763	-797430.4929	-710889.8656	-709688.7061	-918449.9142	-857381.3792	-810875.1889	-685563.0496	-639266.3506	-850875.008	-808277.8575	-770950.6259	-648277.7206	-556905.6115	-769638.9081	-785990.5953	-771015.6863	-654473.2247	-728918.6038	-871967.0044	-869470.6191	-839769.2734	-730351.1916	-784160.1714	-988625.7401	-926235.9483	-879524.0135	-751352.7763	-712448.628	-919990.6222	-876670.9232	-839148.8396	-713596.4223	-624377.7005	-833652.9509	-849149.4466	-833474.2653	-713927.4127	-842133.7605	-939129.3765	-921287.5012	-882107.9914	-749812.5177	-858631.5743	-1058801.504	-995090.5174	-948172.838
255	-526691.6654	-786660.2957	-907436.7777	-851269.6653	-721168.5203	-558254.4329	-919738.5493	-1009272.255	-862855.7563	-688732.7729	-521994.9525	-856371.7113	-930611.8089	-812564.5034	-650775.84	-524609.654	-775769.0913	-825414.5315	-784937.8349	-655890.7089	-650050.2624	-871198.2204	-950254.1334	-877005.34	-738340.1174	-634310.6714	-992419.4073	-1077784.814	-930173.2904	-754468.8114	-596944.0031	-926990.1929	-997851.7464	-879479.2881	-716006.1176	-592689.5279	-839842.5828	-887632.0179	-846699.5845	-715209.608	-773408.8594	-955736.1496	-993071.4173	-902740.9569	-755511.7149	-710366.8474	-1065100.212	-1146297.355	-997490.8245
256	-532973.2878	-714551.1707	-831611.9333	-880731.9037	-749854.9107	-558730.3544	-781097.522	-917832.914	-938262.2808	-725132.6709	-521637.9748	-746216.2189	-861592.2155	-875287.2048	-680873.7516	-530275.2541	-745842.2304	-808381.5056	-807803.7349	-666252.1174	-642421.994	-796139.55	-895728.1188	-909337.6673	-758361.455	-632735.9832	-852856.2344	-988345.2575	-1005840.324	-789699.5215	-595129.2757	-816796.2811	-930451.5996	-941797.1904	-744940.1028	-597685.1382	-809920.1942	-870897.2491	-868947.8892	-724881.8054	-751870.7001	-877727.9293	-959844.2418	-937943.3684	-766868.0007	-706741.5504	-924614.8843	-1058857.607	-1073418.38
257	-532926.7712	-726327.734	-789606.0858	-861493.8616	-805757.5794	-558845.7908	-775834.8094	-830220.8535	-925187.0079	-842922.9895	-522738.8593	-741767.137	-793117.3226	-869004.6853	-777190.5566	-532725.2532	-747933.0093	-791230.1259	-809201.3522	-696327.2781	-639839.0849	-794475.516	-851826.6634	-902795.6474	-818465.3714	-632551.181	-846504.7493	-900575.3825	-994636.1798	-908529.3022	-595882.6449	-811546.6373	-862170.801	-936587.8394	-841074.7967	-599743.8363	-811506.5401	-853645.2986	-870215.0016	-754272.0096	-746751.399	-862623.2982	-914047.1784	-944097.3673	-831173.1634	-706256.5083	-917174.6267	-970929.9113	-1064085.352
258	-532214.3334	-710905.5473	-856106.7171	-925370.0167	-767494.7391	-554088.6355	-781499.6983	-970241.6213	-1007481.767	-742073.4671	-517234.4534	-746852.2317	-903853.8512	-929774.9241	-693092.5847	-527276.8308	-744534.2307	-819548.2093	-822464.3533	-667106.3766	-641689.3365	-798097.2828	-924974.5913	-949077.6469	-771935.3696	-628502.7129	-854146.9183	-1041690.824	-1074948.986	-806391.3795	-591101.9862	-818065.5804	-973103.8498	-995912.1293	-756976.7968	-594951.6035	-808898.6492	-882166.8549	-883499.4443	-725814.7788	-751164.3395	-885289.0183	-993842.403	-972785.2146	-776376.0026	-702916.729	-926794.076	-1113140.036	-1142416.224
259	-605038.0036	-793808.1985	-813927.9435	-798221.0792	-711994.3661	-690965.8768	-900365.7337	-853416.6618	-811867.0618	-686905.2559	-624855.6933	-837020.6243	-805679.0501	-772263.372	-649777.1111	-554096.9681	-766818.1659	-786391.7008	-772510.5455	-655822.5393	-717753.7912	-861589.7855	-866278.6153	-839871.5148	-730942.5847	-765283.7016	-970547.4446	-922275.9624	-880400.7451	-752591.2346	-697993.141	-906184.4803	-874044.6302	-840324.9588	-714973.057	-621500.8444	-830775.628	-849442.9726	-834821.6669	-715150.8702	-830469.5849	-929371.3725	-918629.2261	-881521.8879	-749890.8035	-839601.4639	-1040729.093	-991135.2629	-948934.4284
260	-532269.4263	-711170.1847	-854328.6299	-922129.7164	-766214.2562	-554425.58	-781470.5042	-966437.2501	-1002457.094	-740843.7272	-517554.107	-746806.0632	-900786.0604	-925819.6365	-692205.6142	-527494.4877	-744629.179	-818737.6134	-821400.1326	-667044.3656	-641742.5204	-797955.1701	-922851.5769	-946192.9043	-770950.0332	-628810.0079	-854053.227	-1037818.446	-1069932.358	-805179.7101	-591394.3289	-817973.4414	-970007.7042	-991983.902	-756103.0478	-595150.032	-808972.8036	-881348.7893	-882443.1405	-725747.0539	-751215.6146	-884740.1555	-991374.4615	-970256.0296	-775685.8125	-703194.3744	-926635.8875	-1109199.65	-1137407.64
261	-533350.2108	-716361.7131	-819446.9784	-858563.0765	-741094.3632	-561035.5921	-780897.7874	-891804.9414	-903885.4955	-716719.287	-523824.9154	-745900.353	-840603.6288	-848226.7231	-674805.4574	-531764.3746	-746491.8282	-802835.7352	-800522.7658	-665827.8628	-642785.857	-795167.2724	-881203.3113	-889601.4221	-751620.1805	-634838.3714	-852215.2362	-961852.0084	-971518.5783	-781409.7688	-597129.3667	-816165.9033	-909269.0203	-914921.8444	-738962.2652	-599042.7058	-810427.5287	-865300.3739	-861721.0848	-724418.4586	-752221.5032	-873972.8317	-942959.5817	-920639.7052	-762145.9989	-708641.0887	-923532.6225	-1031899.08	-1039151.67
262	-533421.4861	-724339.6885	-789463.0069	-840388.9804	-774320.7031	-561725.9829	-777495.6684	-829091.6416	-886365.6194	-789417.6599	-525110.6879	-742984.8678	-791415.9767	-836987.1009	-734467.8335	-533721.835	-747996.0396	-790438.1238	-799463.5027	-684851.1524	-641239.7302	-793848.2417	-849381.6093	-880156.8265	-788060.1825	-635283.4327	-848002.2381	-898913.7718	-955204.0313	-854802.6384	-598144.0094	-812656.8492	-860152.9532	-904414.6264	-798532.9723	-600715.9745	-811572.6962	-852825.0924	-860593.2771	-742995.4481	-749057.9745	-863356.795	-909300.1491	-919924.6079	-801799.6619	-708840.8197	-918508.7452	-968735.9018	-1024042.443
263	-586337.2149	-774527.0638	-807395.2477	-799607.2924	-713930.996	-658137.289	-868656.9519	-846464.9307	-813606.2107	-689258.6789	-599588.0632	-812728.3637	-801122.3041	-774565.1396	-652406.1408	-549172.2961	-761872.2796	-787094.9989	-775131.6299	-658188.4259	-698177.4214	-843394.3815	-860681.7593	-840050.7848	-731979.5328	-732185.7206	-938848.9816	-915332.5274	-881938.0054	-754762.7461	-672646.9065	-881976.8065	-869439.691	-842387.165	-717386.8467	-616456.568	-825730.5332	-849957.6407	-837184.1993	-717296.0793	-810017.6325	-912261.6992	-913968.2096	-880494.2148	-750028.0697	-806234.0897	-1009040.949	-984200.1241	-950269.8002
264	-583277.132	-771372.0167	-806326.2773	-799834.1239	-714247.8943	-652765.4194	-863468.3205	-845327.3919	-813890.7944	-689643.7787	-595453.4225	-808753.3264	-800376.666	-774941.7868	-652836.3391	-548366.4529	-761062.965	-787210.0823	-775560.5282	-658575.5652	-694974.0638	-840416.9967	-859765.924	-840080.1195	-732149.2126	-726769.7691	-933662.0387	-914196.3461	-882189.5533	-755118.079	-668499.4035	-878015.6106	-868686.1669	-842724.6118	-717781.8245	-615631.1534	-824904.9847	-850041.8579	-837570.7897	-717647.1082	-806670.9999	-909461.9768	-913205.5093	-880326.0526	-750050.5311	-800774.0563	-1003855.694	-983065.3003	-950488.3123
265	-533171.0899	-715501.3091	-825227.9953	-869098.1229	-745257.5413	-559940.0995	-780992.7051	-904173.9268	-920221.9947	-720717.4863	-522785.6398	-746050.4584	-850577.8026	-861086.3763	-677689.2257	-531056.7164	-746183.127	-805471.1903	-803982.8202	-666029.4767	-642612.9424	-795629.3171	-888105.7748	-898980.4595	-754823.7618	-633839.2767	-852519.8507	-974442.102	-987828.9219	-785349.2162	-596178.8856	-816465.4708	-919335.383	-927693.5177	-741803.0468	-598397.564	-810186.4337	-867960.115	-865155.399	-724638.6497	-752054.7949	-875757.3252	-950983.4919	-928862.7336	-764389.9836	-707738.3921	-924046.9338	-1044710.282	-1055435.859
266	-530190.9313	-756345.9941	-852969.4566	-829245.7156	-720317.4597	-562175.3291	-855544.1656	-925350.6124	-842395.9989	-691992.8795	-525342.1662	-805114.493	-865111.2143	-798009.2969	-654898.168	-529611.0208	-763024.5022	-808662.0875	-783781.033	-659983.0934	-647120.0961	-835056.5157	-901810.1194	-860209.7925	-736739.404	-636961.1005	-927091.6209	-994037.3803	-909921.9322	-757388.7792	-599319.5795	-875210.2471	-932785.7477	-865034.867	-719737.4607	-597170.9811	-826871.6149	-870934.9233	-845345.2235	-718921.692	-764049.2609	-913767.0398	-950650.7147	-891173.8094	-753161.3484	-711746.8094	-998639.0188	-1062724.138	-977447.8654
267	-532288.7843	-728891.5274	-789790.601	-888710.8208	-846298.7307	-555131.4808	-773692.9574	-831677.0908	-975251.2625	-911923.7272	-519680.1376	-740196.7453	-795311.3866	-910294.7203	-832285.9916	-531440.0565	-747851.725	-792251.4957	-821759.331	-711126.9466	-638032.8059	-795284.4521	-854979.8173	-931990.7828	-857676.0534	-629027.6557	-844573.5804	-902718.204	-1045488.073	-977815.4735	-592966.3781	-810114.9026	-864773.0275	-978078.5739	-895936.9437	-598490.1621	-811421.225	-854703.0406	-882623.225	-768814.319	-743776.8279	-861677.3772	-920168.9708	-975270.6773	-869053.3762	-702923.7676	-915454.141	-973759.3169	-1115724.884
268	-624774.2597	-814156.9344	-820822.3562	-796758.1111	-709950.5046	-725612.1915	-933830.2384	-860753.3119	-810031.6159	-684421.5233	-651522.3984	-862657.9535	-810488.1042	-769834.155	-647002.5114	-559294.3205	-772037.9071	-785649.461	-769744.331	-653325.6528	-738414.1094	-880792.6735	-872185.3705	-839682.3186	-729848.2206	-800214.3258	-1004001.059	-929603.857	-878778.3664	-750299.486	-724742.8028	-931732.5388	-878904.546	-838148.5678	-712425.6152	-626824.4236	-836100.0709	-848899.8072	-832328.3204	-712886.8805	-852053.9668	-947428.4125	-923548.3243	-882606.4636	-749745.9368	-874816.3977	-1074171.818	-998454.402	-947525.1168
269	-574495.0031	-762317.3499	-803258.44	-800485.1073	-715157.3604	-637348.6959	-848577.4722	-842062.7703	-814707.5209	-690748.9761	-583587.4211	-797345.371	-798236.7599	-776022.7262	-654070.965	-546053.7641	-758740.3137	-787540.36	-776791.4228	-659686.6157	-685780.7509	-831872.203	-857137.569	-840164.307	-732636.1767	-711226.5352	-918776.0362	-910935.6205	-882911.4704	-756137.8485	-656596.4885	-866647.3782	-866523.6287	-843693.0501	-718915.3709	-613262.2968	-822535.7439	-850283.5526	-838680.2651	-718654.5257	-797066.5022	-901427.056	-911016.6364	-879843.4442	-750114.9931	-785104.3119	-988974.5377	-979808.4707	-951115.4199
270	-525399.7334	-797852.3617	-927546.1589	-859400.9262	-721482.7326	-556806.8346	-943439.1704	-1040256.196	-870409.5162	-687529.1387	-520759.1584	-875295.9199	-954794.6841	-817938.298	-649253.8729	-522763.1451	-780474.4045	-831599.548	-785364.9271	-654379.797	-651132.0823	-884541.7685	-968139.7046	-883206.2704	-738931.1022	-633332.1307	-1016538.482	-1108704.438	-937650.1091	-753390.7568	-596066.9383	-946107.3929	-1021874.169	-884812.1807	-714628.5026	-591034.9715	-844631.4751	-893796.5995	-847199.6158	-713839.1035	-776864.4311	-971231.1807	-1008733.177	-907011.5576	-756379.4722	-709857.3643	-1089637.741	-1177152.658	-1004890.702
271	-532577.4875	-727731.3541	-789707.1038	-876394.5443	-827952.9624	-556812.2883	-774662.1928	-831018.1112	-952596.0792	-880699.3661	-521064.2769	-740907.3823	-794318.5241	-891610.0656	-807354.0878	-532021.6365	-747888.5079	-791789.3033	-816076.5676	-704429.769	-638850.1871	-794918.3906	-853552.9454	-918779.3379	-839932.3519	-630622.1289	-845447.4771	-901748.5299	-1022476.466	-946461.9474	-594286.0534	-810762.7943	-863595.4624	-959303.0982	-871110.6079	-599057.4774	-811459.832	-854224.3889	-877008.2293	-762233.6021	-745122.8872	-862105.4274	-917398.7242	-961164.0645	-851911.7415	-704431.9065	-916232.6989	-972478.9483	-1092356.853
272	-621134.6905	-810404.4176	-819550.9553	-797027.8975	-710327.4137	-719223.0537	-927659.0385	-859400.358	-810370.0911	-684879.5493	-646604.7829	-857930.1655	-809601.265	-770282.1277	-647514.1762	-558335.8751	-771075.333	-785786.3377	-770254.4495	-653786.1045	-734604.1336	-877251.4628	-871096.1039	-839717.2084	-730050.0326	-793772.7584	-997831.8676	-928252.5176	-879077.5497	-750722.1081	-719809.8892	-927021.2133	-878008.3274	-838549.9168	-712895.3897	-625842.7006	-835118.1887	-848999.9725	-832788.1192	-713304.3836	-848073.5841	-944098.5081	-922641.1919	-882406.4567	-749772.6517	-868322.4007	-1068004.634	-997104.6773	-947785.0084
273	-533720.8102	-718141.8804	-807486.1121	-836766.1704	-732480.7894	-563302.1554	-780701.4037	-866213.634	-870085.4415	-708447.0524	-525975.1663	-745589.7863	-819967.1627	-821620.2288	-668838.9696	-533228.5125	-747130.5278	-797383.0049	-793363.9479	-665410.7259	-643143.6156	-794211.3064	-866922.1831	-870196.2872	-744992.0029	-636905.4882	-851584.9919	-935803.2304	-937772.6401	-773259.0913	-599095.9026	-815546.1012	-888441.8162	-888497.3797	-733084.7164	-600377.4979	-810926.3518	-859797.3963	-854615.5228	-723962.8852	-752566.4209	-870280.7324	-926358.1917	-903626.3416	-757503.217	-710508.7589	-922468.5176	-1005392.829	-1005459.844
274	-530791.7035	-751141.4772	-843618.2238	-825464.5294	-720171.3452	-562848.4889	-844522.9401	-910942.5086	-838883.3614	-692552.5915	-525916.8332	-796314.3873	-853865.7317	-795510.3834	-655605.9106	-530469.6815	-760836.4449	-805785.9409	-783582.4272	-660685.6952	-646617.0299	-828851.52	-893492.9992	-857326.2456	-736464.5852	-637416.1399	-915875.807	-979659.1855	-906445.0737	-757890.0944	-599727.4308	-866320.3969	-921614.8789	-862554.9737	-720378.0771	-597940.3803	-824644.6918	-868068.2793	-845112.6997	-719559.0018	-762442.3564	-906561.5649	-943367.7079	-889187.9014	-752757.8253	-711983.7284	-987228.6157	-1048375.854	-974006.786
275	-533749.1063	-723023.1249	-789368.2543	-826412.4803	-753501.9408	-563633.3618	-778595.556	-828343.8321	-860656.5365	-753984.2813	-526681.408	-743791.298	-790289.2771	-815783.7705	-706175.1301	-534381.8115	-748037.7808	-789913.6282	-793014.7076	-677251.2009	-642167.2937	-793432.8354	-847762.3962	-865164.49	-767924.645	-637092.8395	-848993.9353	-897813.3864	-929090.4787	-819222.6835	-599641.5758	-813392.0762	-858816.6533	-883108.2324	-770360.0674	-601359.7635	-811616.5074	-852281.9189	-854221.3847	-735527.6561	-750585.4814	-863842.546	-906156.4756	-903916.4357	-782347.3493	-710552.2546	-919392.252	-967282.9405	-997524.4208
276	-658121.7528	-848539.3081	-832471.5454	-794286.1975	-706497.0806	-784152.5621	-990373.7562	-873149.7305	-806930.3427	-680224.8685	-696579.9697	-905976.2331	-818613.7538	-765729.6126	-642314.3911	-568076.0606	-780857.4767	-784395.3306	-765070.3787	-649106.7725	-773322.9501	-913238.9578	-882165.7579	-839362.642	-727999.1211	-859235.082	-1060526.177	-941985.4818	-876037.1035	-746427.2181	-769940.5425	-974899.982	-887116.1344	-834471.2146	-708121.3136	-635819.4438	-845096.5504	-847982.0442	-828115.4214	-709061.5155	-888524.158	-977938.6076	-931859.9106	-884439.024	-749501.1619	-934317.5394	-1130678.534	-1010821.233	-945143.8643
277	-532528.9427	-727926.4346	-789721.1436	-878465.4981	-831037.7614	-556529.6643	-774499.2181	-831128.9171	-956405.4965	-885949.6711	-520831.537	-740787.8903	-794485.4716	-894751.8475	-811546.3305	-531923.8451	-747882.323	-791867.0199	-817032.1113	-705555.8841	-638712.7463	-794979.943	-853792.8706	-921000.8121	-842915.9148	-630354.0219	-845300.5334	-901911.5784	-1026345.815	-951733.9711	-594064.153	-810653.8527	-863793.4673	-962460.1515	-875285.0995	-598962.0846	-811453.3403	-854304.8731	-877952.378	-763340.1346	-744896.5504	-862033.4517	-917864.5349	-963536.0592	-854794.0682	-704178.3164	-916101.7861	-972694.2394	-1096286.134
278	-532001.2934	-709882.2134	-862982.453	-937900.0264	-772446.275	-552785.6956	-781612.59	-984952.8527	-1026911.818	-746828.7832	-515998.376	-747030.7618	-915716.7788	-945069.7384	-696522.4362	-526435.1672	-744167.0725	-822682.7259	-826579.6189	-667346.1689	-641483.678	-798646.8224	-933184.1359	-960232.7405	-775745.5952	-627314.4253	-854509.216	-1056665.033	-1094347.929	-811076.8182	-589971.5178	-818421.8753	-985076.4237	-1011102.303	-760355.5214	-594184.2947	-808611.8994	-885330.2563	-887584.0956	-726076.6664	-750966.0627	-887411.4314	-1003385.756	-982565.3921	-779044.9181	-701843.0938	-927405.7795	-1128377.225	-1161784.06
279	-611775.4606	-800754.7406	-816281.521	-797721.659	-711296.6436	-702793.2494	-911789.6664	-855921.208	-811240.4872	-686057.3726	-633959.0297	-845772.5579	-807320.7391	-771434.099	-648829.9332	-555871.2123	-768600.0531	-786138.319	-771566.2301	-654970.1656	-724806.6995	-868145.1642	-868295.0316	-839806.9281	-730568.9966	-777208.1303	-981967.6597	-924777.5196	-879846.9062	-751808.8898	-707124.7968	-914905.9391	-875703.6822	-839581.9942	-714103.425	-623318.1792	-832593.2577	-849257.5497	-833970.5017	-714378.0016	-837837.9451	-935535.5877	-920308.4814	-881892.1346	-749841.3497	-851622.9487	-1052145.591	-993633.8313	-948453.3252
280	-585161.201	-773314.5545	-806984.434	-799694.4655	-714052.7825	-656072.8374	-866662.9202	-846027.7656	-813715.5784	-689406.6758	-597999.0883	-811200.7257	-800835.7495	-774709.8881	-652571.4694	-548862.6042	-761561.2537	-787139.2263	-775296.4589	-658337.2066	-696946.346	-842250.1492	-860329.7966	-840062.0584	-732044.7421	-730104.328	-936855.5988	-914895.884	-882034.6773	-754899.3033	-671052.9886	-880454.4878	-869150.1058	-842516.8484	-717538.6398	-616139.3547	-825413.2685	-849990.006	-837332.769	-717430.9824	-808731.4953	-911185.7439	-913675.0979	-880429.5887	-750036.7018	-804135.7561	-1007048.215	-983764.0024	-950353.7761
281	-607135.7868	-795971.0827	-814660.7564	-798065.5791	-711777.1224	-694648.4626	-903922.7039	-854196.4805	-811671.9708	-686641.2579	-627690.1198	-839745.6375	-806190.2084	-772005.1685	-649482.1966	-554649.3991	-767372.9766	-786312.8075	-772216.5222	-655557.1431	-719949.7937	-863630.8766	-866906.4493	-839851.405	-730826.2639	-768996.5069	-974103.2574	-923054.8504	-880228.3011	-752347.6428	-700836.385	-908900.0048	-874561.1947	-840093.6284	-714702.2873	-622066.692	-831341.5675	-849385.2391	-834556.647	-714910.2289	-832763.8069	-931290.6704	-919152.0812	-881637.1684	-749875.4055	-843344.4887	-1044283.748	-991913.2203	-948784.6315
282	-532833.374	-726703.0567	-789633.0976	-865478.2477	-811692.5408	-558302.0399	-775521.2562	-830434.0372	-932516.0898	-853024.2495	-522291.0823	-741537.2418	-793438.5193	-875049.2783	-785256.1706	-532537.1088	-747921.1098	-791379.6478	-811039.7587	-698493.8535	-639574.6574	-794593.939	-852288.2647	-907069.6257	-824205.5607	-632035.3598	-846222.0387	-900889.0777	-1002080.567	-918672.3478	-595455.7224	-811337.0407	-862551.7501	-942661.8135	-849106.2588	-599560.3065	-811494.0505	-853800.1452	-872031.4849	-756400.9093	-746315.9411	-862484.8215	-914943.369	-948660.9375	-836718.5806	-705768.6167	-916922.7588	-971344.118	-1071645.044
283	-606380.1645	-795192.011	-814396.7969	-798121.5903	-711855.3736	-693321.9938	-902641.4819	-853915.5895	-811742.2426	-686736.3501	-626669.1583	-838764.0868	-806006.089	-772098.1735	-649588.4249	-554450.4133	-767173.1336	-786341.2249	-772322.4295	-655652.7389	-719158.7928	-862895.6748	-866680.3032	-839858.6486	-730868.1627	-767659.153	-972822.4523	-922774.2946	-880290.4155	-752435.3847	-699812.2475	-907921.8719	-874375.128	-840176.9537	-714799.8186	-621862.8735	-831137.7158	-849406.0347	-834652.1072	-714996.908	-831937.4273	-930599.3386	-918963.7486	-881595.6443	-749880.9519	-841996.2498	-1043003.36	-991632.9998	-948838.5884
284	-532540.9859	-712474.6164	-845564.2104	-906157.8609	-759902.5917	-556086.4222	-781326.6024	-947685.017	-977689.8363	-734782.1818	-519129.7203	-746578.493	-885664.5265	-906323.5171	-687833.623	-528567.3463	-745097.1912	-814742.0821	-816154.4521	-666738.7051	-642004.6708	-797254.6785	-912386.9671	-931973.638	-766093.1835	-630324.7041	-853591.4105	-1018730.997	-1045204.754	-799207.2367	-592835.3237	-817519.2765	-954746.4054	-972621.1662	-751796.2274	-596128.1114	-809338.3202	-877316.4388	-877236.4836	-725413.2289	-751468.3557	-882034.7405	-979209.6614	-957789.3527	-772283.7773	-704562.9246	-925856.1562	-1089776.986	-1112719.688
285	-531802.2799	-708926.2558	-869405.4898	-949605.0589	-777071.8013	-551568.5413	-781718.0489	-998695.4951	-1045062.593	-751271.0088	-514843.682	-747197.5374	-926798.6501	-959357.5406	-699726.4659	-525648.9189	-743824.088	-825610.8656	-830423.935	-667570.1733	-641291.5601	-799160.1803	-940853.1634	-970653.3816	-779304.9552	-626204.3746	-854847.6599	-1070653.34	-1112469.643	-815453.7671	-588915.4795	-818754.7118	-996260.7222	-1025292.355	-763511.7904	-593467.5056	-808344.0293	-888285.3791	-891399.813	-726321.3112	-750780.8404	-889394.1047	-1012300.774	-991701.6418	-781538.112	-700840.1468	-927977.2085	-1142611.196	-1179876.716
286	-533237.9246	-725077.3428	-789516.0956	-848219.8406	-785985.1982	-560657.3021	-776879.415	-829510.63	-900770.1007	-809270.5438	-524230.6328	-742533.0349	-792047.2525	-848867.0648	-750319.8854	-533352.0583	-747972.6525	-790731.9922	-803076.6829	-689109.3112	-640720.0278	-794080.9887	-850288.8343	-888556.8473	-799341.8752	-634269.6444	-847446.6024	-899530.3041	-969835.132	-874737.6472	-597304.9415	-812244.9107	-860901.6655	-916352.3355	-814317.9027	-600355.2675	-811548.1493	-853129.4258	-864163.3697	-747179.5596	-748202.1312	-863084.6347	-911061.5104	-928893.7889	-812698.5521	-707881.924	-918013.7272	-969549.978	-1038900.163
287	-525081.9547	-800605.2933	-932492.4979	-861400.9864	-721560.0199	-556450.7664	-949268.8528	-1047877.37	-872267.5274	-687233.0788	-520455.188	-879950.7398	-960742.9873	-819260.0995	-648879.5121	-522308.9561	-781631.7784	-833120.8871	-785469.9797	-654008.1555	-651398.1793	-887823.9039	-972539.0491	-884731.5239	-739076.4677	-633091.4374	-1022471.092	-1116309.791	-939489.195	-753125.5858	-595851.2052	-950809.6833	-1027783.005	-886123.9214	-714289.6483	-590627.9975	-845809.4072	-895312.9121	-847322.6093	-713501.9981	-777714.404	-975042.52	-1012585.527	-908062.0046	-756592.9159	-709732.0459	-1095673.279	-1184742.19	-1006710.863
288	-532079.0609	-729734.3151	-789851.2561	-897657.7666	-859625.6965	-553910.4872	-772988.8731	-832155.7951	-991708.7284	-934606.1239	-518674.6535	-739680.5154	-796032.6345	-923867.8644	-850397.3417	-531017.5778	-747825.0047	-792587.2475	-825887.4761	-715991.9954	-637439.0334	-795550.3711	-856016.3437	-941588.0084	-870565.6583	-627869.3783	-843938.7533	-903422.607	-1062204.457	-1000591.7	-592007.7228	-809644.2529	-865628.4493	-991717.6933	-913971.6057	-598078.0457	-811393.1796	-855050.7488	-886702.1415	-773594.7669	-742799.0065	-861366.4275	-922181.3685	-985518.1819	-881505.6201	-701828.2061	-914888.5711	-974689.4186	-1132700.186
289	-527460.1011	-780003.3019	-895475.8021	-846433.2254	-720981.6281	-559115.4582	-905641.5194	-990843.1362	-858362.8117	-689448.6894	-522729.9977	-845115.6714	-916227.9362	-809368.1929	-651681.0995	-525707.9497	-772970.3908	-821735.7096	-784683.8022	-656789.3929	-649406.8005	-863261.534	-939615.8707	-873317.0526	-737988.6022	-634892.7033	-978073.4831	-1059393.952	-925726.11	-755110.0337	-597465.6776	-915619.3626	-983563.3106	-876307.306	-716825.5173	-593673.651	-836994.1697	-883965.3507	-846402.1681	-716024.7784	-771353.4998	-946519.7702	-983755.8685	-900200.8215	-754995.5765	-710669.8859	-1050505.393	-1127944.751	-993089.4084
290	-532468.7074	-728168.4944	-789738.5646	-881035.1795	-834865.4427	-556178.9788	-774296.9957	-831266.4073	-961132.2989	-892464.3561	-520542.7487	-740639.6223	-794692.6236	-898650.2345	-816748.1503	-531802.5036	-747874.6485	-791963.4522	-818217.7693	-706953.1906	-638542.207	-795056.3185	-854090.5747	-923757.2625	-846617.9802	-630021.3492	-845118.2026	-902113.8922	-1031146.982	-958275.6053	-593788.8145	-810518.6759	-864039.1558	-966377.4874	-880464.8935	-598843.7193	-811445.2853	-854404.7395	-879123.8968	-764713.1426	-744615.7071	-861944.1429	-918442.5221	-966479.2784	-858370.5177	-703863.6566	-915939.3469	-972961.3769	-1101161.666
291	-529374.0338	-763422.815	-865684.7577	-834387.1682	-720516.1383	-561260.0027	-870530.2326	-944941.9735	-847172.2936	-691231.8133	-524560.765	-817080.4013	-880402.2139	-801407.1845	-653935.8177	-528443.4604	-765999.7043	-812572.9164	-784051.0863	-659027.7333	-647804.1383	-843493.7337	-913119.29	-864130.6838	-737113.0878	-636342.3624	-942342.2788	-1013588.073	-914649.5764	-756707.1178	-598765.0054	-887298.1852	-947975.2917	-868406.8919	-718866.3852	-596124.7937	-829899.6648	-874832.831	-845661.3967	-718055.1125	-766234.2429	-923564.6553	-960553.7538	-893874.1398	-753710.0374	-711424.6597	-1014154.268	-1082234.16	-982126.8592
292	-532371.2035	-711659.0696	-851043.8336	-916143.6619	-763848.7222	-555048.0431	-781416.5716	-959409.1444	-993174.631	-738571.9347	-518144.6274	-746720.7727	-895118.696	-918512.7314	-690567.0458	-527896.5818	-744804.5842	-817240.1375	-819434.1162	-666929.8078	-641840.7712	-797692.6345	-918929.5702	-940863.6986	-769129.7458	-629377.6973	-853880.1439	-1030664.705	-1060664.757	-802941.3007	-591934.396	-817803.226	-964287.9576	-984726.9874	-754488.9047	-595516.6041	-809109.7947	-879837.514	-880491.7497	-725621.9404	-751310.3388	-883726.1993	-986815.2445	-965583.6729	-774410.7717	-703707.2901	-926343.6538	-1101920.275	-1128154.9
293	-532218.004	-729175.9626	-789811.0717	-891730.3556	-850796.4932	-554719.4036	-773455.3336	-831838.6503	-980805.548	-919578.8855	-519340.7934	-740022.5212	-795554.803	-914875.5664	-838398.4521	-531297.4727	-747842.7071	-792364.8097	-823152.5526	-712768.8683	-637832.4116	-795374.198	-855329.6381	-935229.7827	-862026.2095	-628636.7448	-844359.3305	-902955.9353	-1051129.742	-985502.2987	-592642.8383	-809956.0614	-865061.7267	-982681.6862	-902023.5224	-598351.0755	-811411.7598	-854820.3898	-883999.8322	-770427.6884	-743446.8197	-861572.4337	-920848.1417	-978729.1421	-873255.9259	-702554.0228	-915263.2649	-974073.2201	-1121453.936
294	-529133.7811	-765504.1352	-869424.3766	-835899.2892	-720574.5704	-560990.8017	-874937.6924	-950703.868	-848577.0203	-691007.9808	-524330.9519	-820599.6208	-884899.3556	-802406.5162	-653652.7868	-528100.0764	-766874.7227	-813723.1061	-784130.5101	-658746.7583	-648005.3178	-845975.1519	-916445.3605	-865283.833	-737222.9896	-636160.3892	-946827.5558	-1019338.007	-916039.9948	-756506.6386	-598601.903	-890853.2942	-952442.5949	-869398.6174	-718610.1985	-595817.1059	-830790.2259	-875979.2206	-845754.3845	-717800.2481	-766876.8544	-926446.1717	-963466.2756	-894668.3174	-753871.4089	-711329.9142	-1018717.363	-1087972.132	-983502.9693
295	-531981.0638	-730128.1231	-789879.5983	-901838.39	-865852.9639	-553339.9558	-772659.8768	-832379.4784	-999398.7789	-945204.8867	-518204.8228	-739439.2976	-796369.6506	-930210.1631	-858860.1997	-530820.1669	-747812.5191	-792744.1336	-827816.427	-718265.278	-637161.5824	-795674.6267	-856500.6795	-946072.4867	-876588.5608	-627328.152	-843642.1188	-903751.7521	-1070015.492	-1011234.306	-591559.7737	-809424.3333	-866028.1607	-998090.8201	-922398.6298	-597885.4768	-811380.0749	-855213.2218	-888608.0894	-775828.5182	-742342.1016	-861221.1306	-923121.6979	-990306.5151	-887324.1577	-701316.2851	-914624.2982	-975124.0255	-1140632.205
296	-533750.3746	-718283.8923	-806531.9403	-835027.3337	-731793.6461	-563482.9693	-780685.7373	-864172.101	-867389.06	-707787.1392	-526146.7014	-745565.011	-818320.8995	-819497.7097	-668362.9962	-533345.3133	-747181.4798	-796948.0163	-792792.857	-665377.449	-643172.1556	-794135.0447	-865782.9137	-868648.2528	-744463.2435	-637070.3914	-851534.7145	-933725.2028	-935080.5757	-772608.8753	-599252.7819	-815496.6568	-886780.3369	-886389.382	-732615.8381	-600483.9802	-810966.1451	-859358.3991	-854048.6803	-723926.5421	-752593.9365	-869986.1971	-925033.8245	-902269.1095	-757132.8415	-710657.7513	-922383.6292	-1003278.307	-1002772.096
297	-533071.7249	-715024.0112	-828434.9389	-874942.3023	-747567.0099	-559332.3893	-781045.3594	-911035.4598	-929284.4543	-722935.4352	-522209.1152	-746133.7275	-856110.8452	-868220.101	-679288.9585	-530664.1522	-746011.8791	-806933.1746	-805902.2401	-666141.3193	-642517.0203	-795885.6304	-891934.8263	-904183.358	-756600.9066	-633285.042	-852688.8316	-981426.2919	-996876.8719	-787534.5732	-595651.6186	-816631.6519	-924919.5663	-934778.4366	-743378.9333	-598039.68	-810052.6895	-869435.5716	-867060.54	-724760.7979	-751962.3157	-876747.2496	-955434.6512	-933424.3511	-765634.8047	-707237.633	-924332.2413	-1051817.13	-1064469.301
298	-573684.7033	-761481.9039	-802975.3802	-800545.1715	-715241.274	-635926.2426	-847203.5398	-841761.5538	-814782.8777	-690850.9492	-582492.5819	-796292.7943	-798039.3174	-776122.4612	-654184.8801	-545840.3795	-758526.0099	-787570.8337	-776904.9937	-659789.1289	-684932.5124	-831083.8013	-856895.0589	-840172.0747	-732681.1073	-709792.4091	-917402.5509	-910634.7635	-882978.0794	-756231.9395	-655498.2434	-865598.4667	-866324.098	-843782.4049	-719019.9598	-613043.7298	-822317.1414	-850305.853	-838782.6329	-718747.477	-796180.325	-900685.6988	-910814.6759	-879798.9154	-750120.9408	-783658.5131	-987601.4995	-979507.9731	-951173.2812
299	-524803.2804	-803019.4622	-936830.1638	-863154.9287	-721627.7966	-556138.5143	-954381.1621	-1054560.717	-873896.9006	-686973.4506	-520188.6228	-884032.7598	-965959.3206	-820419.2463	-648551.2184	-521910.6575	-782646.7314	-834455.0175	-785562.1051	-653682.2463	-651631.5318	-890702.1553	-976397.0313	-886069.087	-739203.9453	-632880.3626	-1027673.663	-1122979.265	-941101.9717	-752893.0456	-595662.0191	-954933.3323	-1032964.728	-887274.2456	-713992.4917	-590271.1037	-846842.3885	-896642.6346	-847430.4679	-713206.3754	-778459.7832	-978384.854	-1015963.825	-908983.1885	-756780.0943	-709622.1485	-1100966.112	-1191397.79	-1008307.043
300	-533636.8811	-717738.7285	-810194.8719	-841702.4838	-734431.4929	-562788.8501	-780745.8784	-872009.2599	-877740.0902	-710320.4532	-525488.2021	-745660.1198	-824640.673	-827645.7626	-670190.1913	-532896.9314	-746985.8825	-798617.8768	-794985.1949	-665505.1943	-643062.5945	-794427.8026	-870156.4093	-874590.9397	-746493.0766	-636437.3513	-851727.7224	-941702.459	-945415.0333	-775104.9633	-598650.5441	-815686.4668	-893158.5226	-894481.6895	-734415.7963	-600075.2095	-810813.384	-861043.6476	-856224.709	-724066.0582	-752488.3079	-871116.8767	-930117.8842	-907479.3331	-758554.661	-710085.7904	-922709.5039	-1011395.661	-1013089.982
301	-532509.8749	-728003.0599	-789726.6583	-879278.9443	-832249.434	-556418.653	-774435.2035	-831172.4403	-957901.7907	-888011.9289	-520740.1195	-740740.9553	-794551.0467	-895985.9024	-813192.9939	-531885.4338	-747879.8936	-791897.546	-817407.4376	-705998.2089	-638658.7612	-795004.1201	-853887.1104	-921873.381	-844087.8231	-630248.7126	-845242.8156	-901975.6219	-1027865.65	-953804.7598	-593976.9931	-810611.0618	-863871.2413	-963700.2048	-876924.7905	-598924.6155	-811450.7904	-854336.4863	-878323.2284	-763774.7675	-744807.648	-862005.1805	-918047.4998	-964467.7507	-855926.2121	-704078.7092	-916050.3651	-972778.8031	-1097829.509
302	-533440.3109	-716794.5071	-816539.0541	-853263.8154	-739000.2323	-561586.6387	-780850.0426	-885583.186	-895668.0307	-714708.1423	-524347.6841	-745824.848	-835586.4938	-841758.1556	-673354.8856	-532120.3357	-746647.1088	-801510.0681	-798782.3149	-665726.4486	-642872.8352	-794934.858	-877731.2852	-884883.6482	-750008.7388	-635340.9286	-852062.0113	-955519.0328	-963314.2701	-779428.1771	-597607.4706	-816015.2171	-904205.5131	-908497.5319	-737533.3163	-599367.2203	-810548.8025	-863962.4907	-859993.5814	-724307.6996	-752305.3595	-873075.2089	-938923.4539	-916503.4184	-761017.2463	-709095.1564	-923273.9175	-1025454.884	-1030960.517
303	-532520.0165	-727962.305	-789723.7252	-878846.2944	-831604.9784	-556477.6969	-774469.2511	-831149.2915	-957105.9526	-886915.0702	-520788.742	-740765.9188	-794516.1691	-895329.5423	-812317.1785	-531905.8638	-747881.1857	-791881.31	-817207.8117	-705762.9484	-638687.4744	-794991.261	-853836.9868	-921409.2854	-843464.517	-630304.7237	-845273.5141	-901941.5589	-1027057.291	-952703.3637	-594023.3511	-810633.8211	-863829.8754	-963040.6542	-876052.6836	-598944.5443	-811452.1466	-854319.6721	-878125.9832	-763543.5981	-744854.9327	-862020.2172	-917950.1857	-963972.2094	-855324.0556	-704131.6876	-916077.7146	-972733.826	-1097008.63
304	-533688.9677	-723264.7958	-789385.6473	-828978.0334	-757323.4726	-563283.2397	-778393.6585	-828481.1015	-865375.7449	-760488.5	-526393.0836	-743643.2681	-790496.0962	-819675.8943	-711368.5928	-534260.6649	-748030.1187	-790009.9056	-794198.4608	-678646.2625	-641997.0284	-793509.0882	-848059.6221	-867916.5119	-771620.7628	-636760.7014	-848811.8974	-898015.3752	-933883.9323	-825753.808	-599366.6797	-813257.1165	-859061.9471	-887019.2748	-775531.5397	-601241.5883	-811608.4653	-852381.6249	-855391.0215	-736898.4583	-750305.0893	-863753.3807	-906733.5343	-906854.9264	-785918.053	-710238.1003	-919230.0738	-967549.6488	-1002392.12
305	-531153.2191	-748009.6506	-837991.1039	-823189.1944	-720083.4205	-563253.564	-837890.8994	-902272.4083	-836769.626	-692889.3992	-526262.6401	-791018.9092	-847098.7439	-794006.658	-656031.796	-530986.3819	-759519.7778	-804055.2148	-783462.9158	-661108.487	-646314.309	-825117.6535	-888488.1584	-855591.0664	-736299.2125	-637689.9607	-909126.6724	-971007.0829	-904352.8684	-758191.7617	-599972.856	-860970.9148	-914892.79	-861062.6938	-720763.569	-598403.3675	-823304.637	-866343.2715	-844972.7782	-719942.5041	-761475.399	-902225.6584	-938985.1465	-887992.8779	-752515.0046	-712126.2948	-980362.3867	-1039741.75	-971936.1107
306	-531885.5139	-709326.069	-866719.1628	-944709.6261	-775137.2528	-552077.5956	-781673.9425	-992947.8663	-1037471.337	-749413.1227	-515326.6133	-747127.7863	-922163.844	-953381.9079	-698386.4344	-525977.754	-743967.5355	-824386.2205	-828816.1145	-667476.4872	-641371.9102	-798945.477	-937645.7217	-966295.1239	-777816.3128	-626668.6346	-854706.1114	-1064802.966	-1104890.541	-813623.1819	-589357.1497	-818615.5085	-991583.0776	-1019357.605	-762191.734	-593767.2906	-808456.0615	-887049.4487	-889803.9534	-726218.9926	-750858.3065	-888564.885	-1008572.218	-987880.5592	-780495.3757	-701259.6125	-927738.2179	-1136658.077	-1172309.767
307	-531966.1331	-730188.1232	-789883.9165	-902475.3455	-866801.7441	-553253.0302	-772609.7513	-832413.5585	-1000570.427	-946819.7034	-518133.2399	-739402.5459	-796420.9981	-931176.4693	-860149.5921	-530790.0896	-747810.6168	-792768.0366	-828110.32	-718611.633	-637119.3103	-795693.5581	-856574.4724	-946755.7373	-877506.2041	-627245.6914	-843596.9238	-903801.9004	-1071205.573	-1012855.803	-591491.5246	-809390.8265	-866089.0603	-999061.8233	-923682.5627	-597856.1372	-811378.0782	-855237.976	-888898.4777	-776168.8503	-742272.488	-861198.9933	-923264.9656	-991036.0606	-888210.6642	-701238.2893	-914584.0339	-975190.2418	-1141840.72
308	-533713.4939	-718106.7366	-807722.2416	-837196.4815	-732650.8373	-563257.4093	-780705.2807	-866718.8536	-870752.7169	-708610.3615	-525932.7164	-745595.9174	-820374.5646	-822145.49	-668956.759	-533199.6077	-747117.9187	-797490.6519	-793505.2762	-665418.9609	-643136.5527	-794230.1789	-867204.1189	-870579.3804	-745122.8553	-636864.6795	-851597.4341	-936317.4813	-938438.8472	-773420.0007	-599057.0795	-815558.3372	-888852.9836	-889019.0474	-733200.7501	-600351.1466	-810916.5041	-859906.0352	-854755.7996	-723971.8791	-752559.6116	-870353.6212	-926685.9337	-903962.2167	-757594.8741	-710471.8876	-922489.525	-1005916.112	-1006124.983
309	-530286.5352	-755517.7735	-851481.3484	-828643.9966	-720294.2078	-562282.4524	-853790.3032	-923057.7792	-841837.0155	-692081.9492	-525433.6158	-803714.0885	-863321.6647	-797611.6323	-655010.7946	-529747.6637	-762676.3058	-808204.392	-783749.4278	-660094.9019	-647040.0407	-834069.0839	-900486.5747	-859750.9193	-736695.6707	-637033.5132	-925306.7927	-991749.3067	-909368.6424	-757468.556	-599384.4829	-873795.5611	-931008.0718	-864640.2292	-719839.4052	-597293.4194	-826517.2336	-870478.74	-845308.2208	-719023.1103	-763793.5462	-912620.3967	-949491.7336	-890857.782	-753097.1338	-711784.5115	-996823.2246	-1060440.824	-976900.2693
310	-526204.1481	-790883.6802	-915025.1576	-854338.039	-721287.0899	-557708.1741	-928682.1024	-1020964.207	-865706.207	-688278.5752	-521528.6192	-863512.8601	-939737.343	-814592.3328	-650201.5178	-523912.8642	-777544.6658	-827748.4797	-785099.0003	-655320.5584	-650458.4928	-876233.4779	-957003.347	-879345.2935	-738563.1286	-633941.414	-1001520.866	-1089452.496	-932994.707	-754062.0018	-596613.0381	-934204.1681	-1006916.733	-881491.683	-715486.2674	-592065.1724	-841649.6963	-889958.2549	-846888.2739	-714692.441	-774712.8374	-961583.2805	-998981.464	-904352.4904	-755839.1676	-710174.5913	-1074359.577	-1157940.765	-1000283.207
311	-533713.1034	-718104.8609	-807734.8447	-837219.4488	-732659.9133	-563255.021	-780705.4876	-866745.819	-870788.3318	-708619.0779	-525930.4507	-745596.2447	-820396.3091	-822173.5251	-668963.0459	-533198.065	-747117.2457	-797496.3974	-793512.8194	-665419.4005	-643136.1758	-794231.1862	-867219.1668	-870599.8274	-745129.8394	-636862.5014	-851598.0981	-936344.9287	-938474.405	-773428.589	-599055.0074	-815558.9903	-888874.929	-889046.8906	-733206.9432	-600349.7402	-810915.9785	-859911.8336	-854763.2867	-723972.3591	-752559.2481	-870357.5115	-926703.4265	-903980.1436	-757599.7661	-710469.9197	-922490.6462	-1005944.041	-1006160.484
312	-532680.6791	-727316.6714	-789677.2592	-871992.3169	-821395.6035	-557413.0621	-775008.6283	-830782.571	-944498.3989	-869538.7902	-521559.0121	-741161.3865	-793963.6435	-884931.5779	-798442.6354	-532229.5116	-747901.6553	-791624.101	-814045.3679	-702035.9856	-639142.3451	-794787.5487	-853042.9361	-914057.1488	-833590.1908	-631192.0441	-845759.8354	-901401.9376	-1014251.388	-935255.2037	-594757.7471	-810994.3713	-863174.5634	-952592.1482	-862236.8888	-599260.2539	-811473.6313	-854053.3036	-875001.2519	-759881.4454	-745604.0114	-862258.4261	-916408.5503	-956121.9141	-845784.7781	-704970.9632	-916510.9801	-972021.304	-1084004.378
313	-603132.5869	-791843.6505	-813262.3294	-798362.32	-712191.6887	-687620.9835	-897134.9371	-852708.3524	-812044.2631	-687145.0454	-622281.1834	-834545.4945	-805214.7648	-772497.8983	-650044.982	-553595.1951	-766314.2313	-786463.3596	-772777.6069	-656063.5986	-715759.1618	-859735.8622	-865708.3536	-839889.7806	-731048.239	-761911.36	-967317.6994	-921568.4982	-880557.3761	-752812.4892	-695410.6221	-903717.9689	-873575.4346	-840535.0763	-715218.9972	-620986.8848	-830261.585	-849495.412	-835062.3845	-715369.4448	-828385.7426	-927628.0739	-918154.3168	-881417.1787	-749904.7895	-836201.6739	-1037500.399	-990428.644	-949070.489
314	-650804.4467	-840994.9223	-829915.4107	-794828.5995	-707254.8515	-771307.2844	-977966.6398	-870429.6343	-807610.8426	-681145.7235	-686693.1683	-896471.0775	-816830.7752	-766630.2558	-643343.0865	-566149.1187	-778922.2341	-784670.5194	-766095.9653	-650032.5044	-765663.0438	-906119.4003	-879975.8017	-839432.7873	-728404.8616	-846284.3952	-1048123.098	-939268.6317	-876638.6078	-747276.8943	-760022.9845	-965427.9238	-885314.2986	-835278.1214	-709065.7892	-633845.7027	-843122.4891	-848183.4253	-829039.8409	-709900.8999	-880521.6509	-971243.8784	-930036.1327	-884036.9127	-749554.8719	-921261.4436	-1118279.493	-1008107.629	-945666.373
315	-620263.8459	-809506.5479	-819246.7456	-797092.4497	-710417.5973	-717694.3162	-926182.4473	-859076.6349	-810451.0785	-684989.1417	-645428.1385	-856798.9414	-809389.0698	-770389.3147	-647636.603	-558106.5466	-770845.0166	-785819.0883	-770376.5062	-653896.2773	-733692.5156	-876404.1527	-870835.4737	-839725.5565	-730098.3205	-792231.476	-996355.757	-927929.1809	-879149.1357	-750823.2295	-718629.5845	-925893.9282	-877793.888	-838645.9481	-713007.7933	-625607.8025	-834883.2524	-849023.9392	-832898.1359	-713404.2801	-847121.1927	-943301.7574	-922424.1411	-882358.6008	-749779.0439	-866768.5734	-1066529.004	-996781.7268	-947847.193
316	-671933.8505	-862780.0398	-837296.488	-793262.363	-705066.7174	-808399.2217	-1013793.345	-878284.1657	-805645.8357	-678486.6686	-715242.2294	-923918.1007	-821979.2921	-764029.5646	-640372.6327	-571713.343	-784510.4277	-783875.8861	-763134.4885	-647359.3672	-787781.7376	-926677.7865	-886299.5045	-839230.2361	-727233.2482	-883680.7111	-1083938.144	-947113.7896	-874901.7081	-744823.3751	-788660.858	-992779.3751	-890517.2674	-832948.1028	-706338.5279	-639545.0641	-848822.7751	-847601.9188	-826370.4934	-707477.0991	-903629.6366	-990575.5333	-935302.4614	-885198.0467	-749399.7794	-958962.1379	-1154082.881	-1015943.413	-944157.5805
317	-532414.2578	-728387.3036	-789754.3122	-883358.0347	-838325.4626	-555861.9778	-774114.1975	-831390.6911	-965405.0764	-898353.2843	-520281.6994	-740505.5958	-794879.8779	-902174.1686	-821450.3183	-531692.8174	-747867.7112	-792050.6219	-819289.541	-708216.2813	-638388.0486	-795125.3579	-854359.6834	-926248.9469	-849964.4501	-629720.6309	-844953.3853	-902296.7732	-1035486.981	-964188.8941	-593539.9232	-810396.4833	-864261.2451	-969918.5504	-885147.1513	-598736.7234	-811438.004	-854495.0134	-880182.8875	-765954.2687	-744361.8397	-861863.4124	-918964.9919	-969139.7917	-861603.4375	-703579.221	-915792.5106	-973202.855	-1105568.887
318	-526842.1817	-785356.366	-905093.9376	-850322.3341	-721131.913	-558423.085	-916977.3125	-1005662.476	-861975.7068	-688873.002	-522138.9285	-854166.9496	-927794.3871	-811938.4304	-650953.1565	-524824.7812	-775220.8996	-824693.9472	-784888.0765	-656066.7374	-649924.2251	-869643.6326	-948170.378	-876282.9017	-738271.2649	-634424.6761	-989609.4186	-1074182.529	-929302.2049	-754594.4099	-597046.1854	-924762.9468	-995053.0183	-878857.9804	-716166.6164	-592882.2917	-839284.6537	-886913.8144	-846641.3285	-715369.2784	-773006.2686	-953930.9037	-991246.7467	-902243.4113	-755410.617	-710426.2047	-1062241.471	-1142702.564	-996628.703
319	-533596.4855	-717544.6889	-811498.6155	-844078.3631	-735370.379	-562541.793	-780767.2844	-874798.7318	-881424.3218	-711222.1331	-525253.8231	-745693.9719	-826890.0634	-830545.8906	-670840.543	-532737.3392	-746916.2637	-799212.2285	-795765.5115	-665550.6625	-643023.5985	-794532.0036	-871713.0631	-876706.1141	-747215.553	-636212.034	-851796.4195	-944541.7956	-949093.3662	-775993.3933	-598436.1902	-815754.0257	-895428.7036	-897361.9762	-735056.4536	-599929.7161	-810759.0119	-861643.4763	-856999.2206	-724115.7161	-752450.7116	-871519.3183	-931927.4483	-909333.8027	-759060.7278	-709882.2129	-922825.4921	-1014284.862	-1016762.417
320	-633401.9223	-823052.3413	-823836.2341	-796118.5777	-709057.0348	-740757.7548	-948459.176	-863960.5131	-809229.2546	-683335.7649	-663179.6922	-873865.2577	-812590.3721	-768772.2279	-645789.6011	-561566.3321	-774319.706	-785324.9924	-768535.0862	-652234.1442	-747445.7238	-889187.1754	-874767.4961	-839599.6119	-729369.8216	-815484.1745	-1018625.236	-932807.2307	-878069.1469	-749297.653	-736436.361	-942900.8187	-881029.048	-837197.1631	-711312.0064	-629151.615	-838427.6398	-848662.3636	-831238.3593	-711897.1821	-861489.5339	-955322.0095	-925698.6977	-883080.5836	-749682.6087	-890210.5317	-1088791.234	-1001653.948	-946909.0392
321	-528323.4011	-772524.494	-882038.2294	-840999.721	-720771.6639	-560082.7782	-889804.1938	-970138.9204	-853315.2075	-690252.9867	-523555.7851	-832470.0597	-900068.3567	-805777.294	-652698.1145	-526941.8314	-769826.1873	-817602.7326	-784398.4089	-657799.0206	-648683.9024	-854345.0539	-927664.3014	-869173.4416	-737593.6919	-635546.5877	-961956.537	-1038732.715	-920729.9198	-755830.4158	-598051.7534	-902844.7893	-967510.9498	-872743.7388	-717746.0728	-594779.2654	-833794.1165	-879846.0289	-846068.0351	-716940.5825	-769044.4036	-936165.6174	-973290.3038	-897347.1033	-754415.7202	-711010.3347	-1034108.825	-1107326.495	-988144.632
322	-528937.9204	-767200.8851	-872473.0177	-837132.0122	-720622.206	-560771.3416	-878530.776	-955401.1243	-849722.1924	-690825.5063	-524143.6019	-823468.5863	-888565.5503	-803221.1992	-653422.0521	-527820.1403	-767588.0619	-814660.7728	-784195.2585	-658517.6996	-648169.3248	-847998.0728	-919156.8654	-866223.9122	-737312.5846	-636012.0396	-950484.0781	-1024025.512	-917173.5024	-756343.2023	-598468.9374	-893751.5177	-956084.4644	-870207.0995	-718401.348	-595566.2703	-831516.236	-876913.7892	-845830.1907	-717592.4756	-767400.7292	-928795.2637	-965840.6442	-895315.7529	-754002.9635	-711252.6751	-1022437.324	-1092649.887	-984624.8124
323	-532056.5005	-740184.4826	-823931.2077	-817504.0525	-719863.7324	-564265.6827	-821320.1124	-880609.3347	-831488.2562	-693730.9452	-527126.6715	-777787.6513	-830190.7788	-790249.4566	-657095.9112	-532277.4074	-756229.9592	-799730.8306	-783164.3053	-662164.8728	-645557.9319	-815788.2316	-875983.0857	-851255.5557	-735886.0131	-638374.1279	-892263.315	-949388.9785	-899125.2935	-758945.5062	-600586.0743	-847604.7229	-898097.0091	-857334.0899	-721726.7575	-599560.1853	-819956.3824	-862033.1749	-844623.1708	-720900.7212	-759059.3634	-891391.982	-928034.8984	-885006.9978	-751908.2939	-712482.5107	-963206.4579	-1018168.617	-966762.3309
324	-527496.3223	-779689.5157	-894912.0057	-846205.2534	-720972.8187	-559156.0438	-904977.0373	-989974.4555	-858151.0308	-689482.4351	-522764.645	-844585.1032	-915549.9334	-809217.5306	-651723.7701	-525759.7193	-772838.4704	-821562.3035	-784671.828	-656831.7535	-649376.47	-862887.4278	-939114.4222	-873143.2003	-737972.0331	-634920.1381	-977397.2691	-1058527.074	-925516.4863	-755140.2586	-597490.2674	-915083.3835	-982889.8064	-876157.7905	-716864.1407	-593720.039	-836859.906	-883792.5175	-846388.1489	-716063.2025	-771256.6177	-946085.344	-983316.7679	-900081.0889	-754971.2476	-710684.17	-1049817.447	-1127079.677	-992881.9418
325	-532080.3242	-710261.8365	-860431.7815	-933251.8056	-770609.4183	-553269.0434	-781570.7109	-979495.4705	-1019703.909	-745064.7176	-516456.92	-746964.533	-911316.0235	-939395.8662	-695250.0743	-526747.3967	-744303.2761	-821519.9235	-825052.991	-667257.2139	-641559.9705	-798442.9613	-930138.6653	-956094.5683	-774332.1271	-627755.2408	-854374.8155	-1051110.095	-1087151.56	-809338.6748	-590390.8843	-818289.7017	-980634.9932	-1005467.249	-759102.1259	-594468.941	-808718.2742	-884156.7386	-886068.8245	-725979.5147	-751039.6169	-886624.0861	-999845.4867	-978937.2685	-778054.8384	-702241.3771	-927178.8576	-1122724.73	-1154599.231
326	-533068.0596	-715006.405	-828553.2339	-875157.8775	-747652.1996	-559309.9726	-781047.3017	-911288.5623	-929618.7427	-723017.249	-522187.8489	-746136.799	-856314.9434	-868483.2438	-679347.9681	-530649.6716	-746005.5622	-806987.1031	-805973.0421	-666145.4448	-642513.482	-795895.0851	-892076.0691	-904375.2781	-756666.4604	-633264.5979	-852695.0648	-981683.9189	-997210.6251	-787615.1848	-595632.1692	-816637.7819	-925125.5509	-935039.7791	-743437.0633	-598026.4786	-810047.756	-869489.997	-867130.8153	-724765.3036	-751958.9044	-876783.7651	-955598.8418	-933592.6163	-765680.7227	-707219.1614	-924342.7655	-1052079.281	-1064802.519
327	-532785.0806	-713647.1207	-837686.2053	-891801.3642	-754229.2754	-557579.2904	-781197.2546	-930829.3441	-955427.4858	-729333.6879	-520545.9796	-746373.9388	-872072.3517	-888799.193	-683903.8055	-529531.6983	-745517.8697	-811150.6501	-811439.3083	-666463.9586	-642240.3079	-796625.033	-902980.7253	-919192.4776	-761727.5451	-631686.2073	-853176.3011	-1001574.012	-1022978.047	-793838.8063	-594130.5793	-817111.0448	-941028.6013	-955216.7357	-747924.9895	-597007.27	-809666.8692	-873691.9115	-872556.4168	-725113.1662	-751695.5352	-879602.9453	-968275.1829	-946583.5284	-769225.8166	-705793.0625	-925155.2852	-1072318.687	-1090528.622
328	-533102.398	-715171.3488	-827444.9839	-873138.256	-746854.0975	-559519.984	-781029.1055	-908917.3655	-926486.9535	-722250.7741	-522387.0833	-746108.0231	-854402.8441	-866017.9835	-678795.1352	-530785.3333	-746064.7418	-806481.8731	-805309.7322	-666106.7945	-642546.6306	-795806.5088	-890752.8321	-902577.2694	-756052.3178	-633456.1294	-852636.6687	-979270.3345	-994083.8501	-786859.9729	-595814.3812	-816580.3533	-923195.7785	-932591.385	-742892.4711	-598150.1556	-810093.9751	-868980.1112	-866472.4399	-724723.0919	-751990.8632	-876441.6688	-954060.6179	-932016.2203	-765250.5395	-707392.2129	-924244.1694	-1049623.309	-1061680.758
329	-527621.8216	-778602.3101	-892958.5654	-845415.3767	-720942.2959	-559296.6645	-902674.7413	-986964.6522	-857417.253	-689599.357	-522884.691	-842746.7914	-913200.7908	-808695.5162	-651871.6152	-525939.0906	-772381.3928	-820961.4863	-784630.34	-656978.5246	-649271.3812	-861591.2256	-937377.0044	-872540.8373	-737914.6243	-635015.1943	-975054.3242	-1055523.519	-924790.1826	-755244.9816	-597575.4662	-913226.3244	-980556.2504	-875639.7493	-716997.9633	-593880.7638	-836394.7094	-883193.6855	-846339.5755	-716196.3344	-770920.9409	-944580.1451	-981795.3728	-899666.2396	-754886.953	-710733.6615	-1047433.853	-1124082.369	-992163.1122
330	-526043.8414	-792272.4247	-917520.3888	-855346.9898	-721326.0783	-557528.5519	-931622.9452	-1024808.785	-866643.4998	-688129.2248	-521375.2782	-865861.0316	-942738.0253	-815259.1291	-650012.6676	-523683.744	-778128.5149	-828515.9348	-785151.9952	-655133.08	-650592.7282	-877889.1846	-959222.6413	-880114.7232	-738636.4598	-633819.9938	-1004513.631	-1093289.094	-933922.4526	-753928.2337	-596504.2094	-936576.2865	-1009897.506	-882153.404	-715315.3289	-591859.8702	-842243.9162	-890723.1744	-846950.3193	-714522.3848	-775141.6149	-963505.9495	-1000924.821	-904882.3991	-755946.8415	-710111.3732	-1077404.265	-1161769.382	-1001201.405
331	-532291.1561	-711274.5637	-853627.3118	-920851.6681	-765709.2045	-554558.4785	-781458.9893	-964936.7194	-1000475.248	-740358.6897	-517680.1856	-746787.8533	-899576.0538	-924259.5809	-691855.7728	-527580.3365	-744666.6287	-818417.8959	-820980.3796	-667019.907	-641763.4974	-797899.1176	-922014.2117	-945055.096	-770561.394	-628931.212	-854016.273	-1036291.091	-1067953.685	-804701.8001	-591509.6355	-817937.0997	-968786.5137	-990434.5196	-755758.4213	-595228.2967	-809002.0518	-881026.1255	-882026.5102	-725720.3416	-751235.8386	-884523.6715	-990401.0491	-969258.4614	-775413.5858	-703303.8841	-926573.4943	-1107645.473	-1135432.141
332	-645651.3803	-835681.9396	-828115.304	-795210.5753	-707788.4965	-762261.2546	-969229.1764	-868514.061	-808090.071	-681794.2173	-679730.5863	-889777.2618	-815575.1482	-767264.5158	-644067.5246	-564792.1085	-777559.3782	-784864.3156	-766818.214	-650684.4326	-760268.7081	-901105.5944	-878433.5689	-839482.1858	-728690.5962	-837164.1332	-1039388.478	-937355.3444	-877062.2051	-747875.2617	-753038.7428	-958757.4164	-884045.3919	-835846.3694	-709730.9172	-632455.7351	-841732.296	-848325.2438	-829690.8448	-710492.0196	-874886.0453	-966529.2493	-928751.7736	-883753.7338	-749592.6961	-912066.9493	-1109547.716	-1006196.628	-946034.3392
333	-532467.5491	-728173.1489	-789738.8996	-881084.5906	-834939.0432	-556172.2356	-774293.1073	-831269.051	-961223.1882	-892589.6237	-520537.1957	-740636.7713	-794696.6068	-898725.1946	-816848.1735	-531800.1704	-747874.501	-791965.3065	-818240.5677	-706980.0587	-638538.9278	-795057.7871	-854096.2991	-923810.2649	-846689.1653	-630014.9525	-845114.6967	-902117.7824	-1031239.301	-958401.3911	-593783.5201	-810516.0767	-864043.88	-966452.8119	-880564.4931	-598841.4434	-811445.1304	-854406.6598	-879146.4234	-764739.5435	-744610.3069	-861942.4256	-918453.636	-966535.8721	-858439.2874	-703857.6062	-915936.2235	-972966.5135	-1101255.415
334	-532882.7746	-714116.3921	-834533.1918	-886055.4645	-751958.6443	-558176.781	-781145.4857	-924083.1992	-946517.4267	-727153.0376	-521112.8089	-746292.07	-866632.3565	-881785.4339	-682330.9749	-529917.6609	-745686.2378	-809713.2516	-809552.1666	-666353.9967	-642334.6169	-796373.0301	-899216.0658	-914077.0746	-759980.2859	-632231.1216	-853010.1619	-994707.2729	-1014082.253	-791690.1997	-594648.9794	-816947.6583	-935538.3255	-948250.9615	-746375.6042	-597359.1356	-809798.3643	-872241.2672	-870683.3139	-724993.0722	-751786.4593	-878629.6681	-963898.8773	-942098.6221	-768001.9291	-706285.4005	-924874.7756	-1065331.353	-1081647.093
335	-533390.7986	-716556.6759	-818137.0316	-856175.8926	-740151.0099	-561283.8247	-780876.2796	-889002.197	-900183.7342	-715813.3169	-524060.4096	-745866.3399	-838343.5356	-845312.7961	-674152.0113	-531924.7261	-746561.7782	-802238.5556	-799738.7365	-665782.1783	-642825.0385	-795062.5756	-879639.2509	-887476.1836	-750894.2666	-635064.7608	-852146.2122	-958999.1622	-967822.7438	-780517.1116	-597344.7405	-816098.0229	-906988.0376	-912027.8531	-738318.5597	-599188.8914	-810482.1595	-864697.6912	-860942.8879	-724368.5644	-752259.2784	-873568.4752	-941141.4076	-918776.412	-761637.5243	-708845.6348	-923416.0824	-1028996.131	-1035461.762
336	-614292.4861	-803349.8775	-817160.7867	-797535.0822	-711035.9837	-707211.8006	-916057.4977	-856856.8735	-811006.4071	-685740.6146	-637359.9167	-849042.1654	-807934.0526	-771124.2934	-648476.08	-556534.0467	-769265.7428	-786043.6588	-771213.4462	-654651.73	-727441.5735	-870594.1676	-869048.3383	-839782.7993	-730429.429	-781662.9403	-986234.1022	-925712.0686	-879639.9992	-751516.6161	-710536.2634	-918164.1617	-876323.4822	-839304.4323	-713778.5419	-623997.1116	-833272.3002	-849188.2782	-833652.5175	-714089.268	-840590.6678	-937838.4576	-920935.8292	-882030.4538	-749822.8744	-856114.0176	-1056410.644	-994567.2636	-948273.5914
337	-635734.7848	-825457.6001	-824651.1667	-795945.6521	-708815.4465	-744853.0142	-952414.7433	-864827.7189	-809012.3014	-683042.183	-666331.7467	-876895.6382	-813158.8113	-768485.0899	-645461.6382	-562180.6689	-774936.6892	-785237.2583	-768208.1144	-651939.0076	-749887.8122	-891456.9928	-875465.6857	-839577.2485	-729240.4657	-819613.0398	-1022579.516	-933673.4016	-877877.3787	-749026.764	-739598.2212	-945920.6472	-881603.4992	-836939.9096	-711010.894	-629780.872	-839056.999	-848598.1604	-830943.641	-711629.5743	-864040.8483	-957456.3855	-926280.1444	-883208.7825	-749665.4852	-894373.003	-1092744.227	-1002519.084	-946742.456
338	-581730.5041	-769777.3919	-805785.9979	-799948.7691	-714408.0611	-650050.3676	-860845.8811	-844752.4567	-814034.6288	-689838.4159	-593363.6913	-806744.2621	-799999.8054	-775132.1519	-653053.7701	-547959.1634	-760653.921	-787268.2478	-775777.302	-658771.2332	-693355.022	-838912.1661	-859303.0423	-840094.9458	-732234.9723	-724032.4375	-931040.4526	-913622.0971	-882316.6907	-755297.6715	-666403.1714	-876013.5419	-868305.3205	-842895.1643	-717981.4543	-615213.9721	-824487.7358	-850084.4229	-837766.1803	-717824.5253	-804979.544	-908046.9403	-912820.0251	-880241.06	-750061.8836	-798014.4449	-1001234.962	-982491.7374	-950598.7527
339	-531834.6397	-709081.6957	-868361.0958	-947701.8057	-776319.6848	-551766.4521	-781700.9012	-996460.9239	-1042111.253	-750548.6973	-515031.4367	-747170.4195	-924996.7237	-957034.3257	-699205.4865	-525776.7638	-743879.8578	-825134.7463	-829798.8443	-667533.7499	-641322.7987	-799076.7076	-939606.1697	-968958.972	-778726.1987	-626384.8702	-854792.6285	-1068378.823	-1109523.029	-814742.0696	-589087.1927	-818700.5921	-994442.1409	-1022985.034	-762998.5771	-593584.0565	-808387.5853	-887804.8723	-890779.3725	-726281.5317	-750810.9578	-889071.7195	-1010851.181	-990216.0759	-781132.7155	-701003.2273	-927884.2934	-1140296.734	-1176934.827
340	-530175.2322	-756481.9961	-853213.8186	-829344.5237	-720321.2779	-562157.7384	-855832.1671	-925727.1182	-842487.7895	-691978.2533	-525327.1493	-805344.4532	-865405.0759	-798074.5973	-654879.6736	-529588.5827	-763081.6795	-808737.2456	-783786.2228	-659964.7333	-647133.242	-835218.6617	-902027.4584	-860285.144	-736746.5854	-636949.2096	-927384.7073	-994413.1045	-910012.7878	-757375.6791	-599308.9218	-875442.5525	-933077.6596	-865099.6704	-719720.7204	-597150.8755	-826929.8079	-871009.8331	-845351.2997	-718905.0381	-764091.2518	-913955.3299	-950841.0308	-891225.7042	-753171.8931	-711740.6183	-998937.1901	-1063099.081	-977537.786
341	-531052.4469	-748882.6448	-839559.6591	-823823.4422	-720107.9295	-563140.6496	-839739.5755	-904689.1919	-837358.8281	-692795.5143	-526166.2467	-792495.0195	-848985.0364	-794425.8203	-655913.0808	-530842.3521	-759886.7977	-804537.6534	-783496.2295	-660990.6341	-646398.6922	-826158.4658	-889883.2538	-856074.7462	-736345.31	-637613.6333	-911007.9883	-973418.8496	-904936.0689	-758107.6722	-599904.444	-862462.0787	-916766.5669	-861478.6656	-720656.1135	-598274.3102	-823678.1762	-866824.1161	-845011.7812	-719835.6032	-761744.9376	-903434.2889	-940206.782	-888325.9898	-752582.6907	-712086.5546	-982276.3425	-1042148.499	-972513.3098
342	-647754.6948	-837850.5267	-828850.0492	-795054.6652	-707570.6799	-765953.5504	-972795.5254	-869295.9358	-807894.4655	-681529.5232	-682572.4863	-892509.4601	-816087.6544	-767005.6314	-643771.8325	-565345.996	-778115.6517	-784785.2143	-766523.4155	-650418.3367	-762470.5008	-903152.0673	-879063.0583	-839462.023	-728573.9686	-840886.7281	-1042953.666	-938136.2862	-876889.3064	-747631.0275	-755889.4836	-961480.101	-884563.3184	-835614.429	-709459.4335	-633023.0747	-842299.7277	-848267.3581	-829425.1261	-710250.7437	-877186.3166	-968453.6079	-929276.0073	-883869.3182	-749577.2575	-915819.8435	-1113111.744	-1006976.637	-945884.1473
343	-533150.2249	-715401.0844	-825901.4007	-870325.3045	-745742.4917	-559812.4903	-781003.7616	-905614.7358	-922124.9622	-721183.2191	-522664.5791	-746067.9436	-851739.6505	-862584.3412	-678025.1433	-530974.2844	-746147.1678	-805778.183	-804385.8668	-666052.9618	-642592.8003	-795683.1387	-888909.8126	-900072.9826	-755196.933	-633722.8966	-852555.3339	-975908.667	-989728.8426	-785808.1052	-596068.1682	-816500.3661	-920507.9697	-929181.2341	-742133.9571	-598322.4142	-810158.3496	-868269.9366	-865555.4473	-724664.2988	-752035.3758	-875965.193	-951918.1621	-929820.5982	-764651.3755	-707633.2409	-924106.8437	-1046202.603	-1057332.734
344	-531744.5365	-708648.8867	-871269.1205	-953001.2497	-778413.8881	-551215.3865	-781748.6476	-1002682.894	-1050329.002	-752559.9113	-514508.6499	-747245.9271	-930014.032	-963503.1166	-700656.1084	-525420.7905	-743724.5718	-826460.4592	-831539.3553	-667635.1677	-641235.8175	-799309.13	-943078.3157	-973676.9089	-780337.6961	-625882.2957	-854945.8587	-1074712.017	-1117727.62	-816723.7297	-588609.0722	-818851.2836	-999505.823	-1029409.569	-764427.5753	-593259.5308	-808266.3073	-889142.8018	-892506.9355	-726392.2944	-750727.0985	-889969.3732	-1014887.448	-994352.5056	-782261.5071	-700549.1438	-928143.0074	-1146741.152	-1185126.263
345	-533156.2066	-715429.8175	-825708.3443	-869973.4878	-745603.4629	-559849.0742	-781000.5919	-905201.675	-921579.4067	-721049.6997	-522699.2856	-746062.9308	-851406.5642	-862154.8946	-677928.8402	-530997.9165	-746157.4768	-805690.1723	-804270.3187	-666046.2289	-642598.5748	-795667.7088	-888679.3057	-899759.7708	-755089.9497	-633756.2612	-852545.1613	-975488.2223	-989184.1606	-785676.5478	-596099.9094	-816490.3621	-920171.8047	-928754.7256	-742039.0895	-598343.9587	-810166.401	-868181.1149	-865440.7588	-724656.9456	-752040.943	-875905.6001	-951650.2046	-929545.9912	-764576.4379	-707663.3864	-924089.6683	-1045774.775	-1056788.925
346	-533099.0046	-725635.6025	-789556.2733	-854146.2661	-794812.9336	-559848.5203	-776413.032	-829827.7221	-911671.4683	-824295.2837	-523564.6037	-742191.086	-792525.0045	-857857.8678	-762316.7801	-533072.2099	-747954.9531	-790954.3929	-805811.1517	-692331.9024	-640326.715	-794257.1325	-850975.4258	-894914.0159	-807879.9042	-633502.4055	-847026.0951	-899996.8982	-980908.006	-889824.5396	-596669.9316	-811933.154	-861468.2939	-925386.8403	-826263.9995	-600082.283	-811529.5721	-853359.7465	-866865.2296	-750346.1115	-747554.4257	-862878.6628	-912394.5156	-935681.7	-820946.8748	-707156.2279	-917639.0957	-970166.0741	-1050144.544
347	-531851.7162	-741958.5383	-827118.7481	-818792.9396	-719913.5382	-564036.2237	-825076.9007	-885520.603	-832685.6035	-693540.157	-526930.7856	-780787.3298	-834024.0093	-791101.2575	-656854.664	-531984.7171	-756975.799	-800711.2183	-783232.0038	-661925.3779	-645729.4113	-817903.319	-878818.1297	-852238.4659	-735979.6902	-638219.0193	-896086.4324	-954290.0518	-900310.445	-758774.6237	-600447.0507	-850634.9925	-901904.806	-858179.4074	-721508.3916	-599297.9214	-820715.4703	-863010.3235	-844702.4309	-720683.4823	-759607.1065	-893848.1012	-930517.4458	-885683.9312	-752045.8422	-712401.7524	-967095.9045	-1023059.495	-967935.2864
348	-532730.866	-727114.9922	-789662.7444	-869851.3117	-818206.4591	-557705.246	-775177.1157	-830668.017	-940560.1254	-864110.8901	-521799.6246	-741284.9204	-793791.0489	-881683.523	-794108.5873	-532330.6108	-747908.0495	-791543.7556	-813057.5023	-700871.7789	-639284.4349	-794723.9142	-852794.8952	-911760.5317	-830505.7069	-631469.2201	-845911.7496	-901233.3739	-1010251.156	-929804.8502	-594987.1535	-811106.9978	-862969.8608	-949328.3054	-857921.1922	-599358.8734	-811480.3426	-853970.097	-874025.1667	-758737.4837	-745838.0042	-862332.8364	-915926.9833	-953669.6851	-842804.9547	-705233.1312	-916646.3211	-971798.7305	-1079942.186
349	-661552.9056	-852076.9406	-833670.1407	-794031.8601	-706141.7548	-790175.8321	-996191.5682	-874425.2089	-806611.25	-679793.071	-701215.9827	-910433.2888	-819449.809	-765307.2927	-641832.0263	-568979.6215	-781764.93	-784266.292	-764589.4717	-648672.6882	-776914.7513	-916577.3844	-883192.6487	-839329.7502	-727808.8657	-865307.7793	-1066342.095	-943259.438	-875755.0526	-746028.7971	-774590.9775	-979341.518	-887961.0319	-834092.8485	-707678.4402	-636744.9493	-846022.206	-847887.6148	-827681.9525	-708667.9203	-892276.6079	-981077.8282	-932715.0969	-884627.5778	-749475.9768	-940439.664	-1136492.56	-1012093.667	-944898.8552
350	-532978.0576	-726121.6362	-789591.253	-859305.949	-802498.5638	-559144.3761	-776006.9883	-830103.7897	-921162.4506	-837376.1691	-522984.7434	-741893.3774	-792940.9465	-865685.4685	-772761.5535	-532828.5674	-747939.5435	-791148.0202	-808191.8434	-695137.5647	-639984.2878	-794410.4874	-851573.1882	-900448.7135	-815313.3093	-632834.4296	-846659.9918	-900403.1257	-990548.3058	-902959.5364	-596117.0773	-811661.7314	-861961.6136	-933252.4888	-836664.5471	-599844.6165	-811513.3984	-853560.269	-869217.5313	-753102.9847	-746990.5184	-862699.3388	-913555.0607	-941591.4122	-828128.0549	-706524.4202	-917312.9329	-970702.4615	-1059934.161
351	-533384.5586	-724488.0843	-789473.6869	-841964.3348	-776667.2797	-561510.9936	-777371.6951	-829175.9306	-889263.4061	-793411.5157	-524933.6449	-742893.9714	-791542.9721	-839377.0239	-737656.8317	-533647.4461	-747991.3348	-790497.242	-800190.3755	-685707.7772	-641135.1803	-793895.064	-849564.1181	-881846.6804	-790329.7497	-635079.4863	-847890.4594	-899037.8012	-958147.4076	-858813.0156	-597975.212	-812573.9785	-860303.5736	-906816.1661	-801708.4675	-600643.4101	-811567.758	-852886.3159	-861311.4819	-743837.1766	-748885.8023	-863302.0438	-909654.4867	-921728.9612	-803992.2198	-708647.9162	-918409.1611	-968899.6716	-1027031.409
352	-616776.1942	-805910.6631	-818028.4137	-797350.9751	-710778.774	-711571.8642	-920268.8365	-857780.1539	-810775.4255	-685428.0494	-640715.7868	-852268.4938	-808539.2477	-770818.5887	-648126.9106	-557188.1072	-769922.6208	-785950.2517	-770865.3321	-654337.5094	-730041.5702	-873010.754	-869791.6736	-839758.9899	-730291.7088	-786058.7829	-990444.0706	-926634.2471	-879435.8311	-751228.2111	-713902.5732	-921379.2558	-876935.078	-839030.5445	-713457.9592	-624667.0572	-833942.3545	-849119.9235	-833338.7425	-713804.3563	-843306.9532	-940110.8449	-921554.8728	-882166.9422	-749804.6437	-860545.6391	-1060619.242	-995488.3403	-948096.2366
353	-527312.3472	-781283.3011	-897775.6449	-847363.1706	-721017.5635	-558949.9012	-908352.0804	-994386.6663	-859226.71	-689311.0338	-522588.664	-847279.97	-918993.6509	-809982.7759	-651507.0372	-525496.7707	-773508.5218	-822443.0693	-784732.6473	-656616.5949	-649530.5246	-864787.5911	-941661.3838	-874026.2323	-738056.1911	-634780.7908	-980831.9012	-1062930.126	-926581.2088	-754986.7402	-597365.3706	-917805.733	-986310.6749	-876917.2111	-716667.964	-593484.4249	-837541.8593	-884670.3733	-846459.355	-715868.0384	-771748.702	-948291.8852	-985547.0517	-900689.2359	-755094.819	-710611.618	-1053311.668	-1131473.569	-993935.7077
354	-532775.7891	-713602.489	-837986.084	-892347.8487	-754445.2319	-557522.4639	-781202.1783	-931470.9605	-956274.9091	-729541.0866	-520492.0692	-746381.7252	-872589.7421	-889466.2618	-684053.3953	-529494.99	-745501.8564	-811287.3591	-811618.7917	-666474.4169	-642231.3383	-796649.0007	-903338.7769	-919678.9964	-761893.7245	-631634.3812	-853192.1024	-1002227.098	-1023824.113	-794043.1572	-594081.275	-817126.5843	-941550.7738	-955879.2407	-748072.3493	-596973.8046	-809654.3628	-873829.8802	-872734.565	-725124.5882	-751686.8876	-879695.5124	-968691.4072	-947010.0816	-769342.2188	-705746.2369	-925181.9641	-1072983.242	-1091373.332
355	-532710.7809	-727195.7057	-789668.5534	-870708.1572	-819482.7773	-557588.3119	-775109.6859	-830713.8623	-942136.2504	-866283.1742	-521703.3298	-741235.4812	-793860.1225	-882983.4176	-795843.1041	-532290.1502	-747905.4905	-791575.9104	-813452.8532	-701337.7026	-639227.5696	-794749.3812	-852894.163	-912679.6541	-831740.1392	-631358.2923	-845850.9525	-901300.8343	-1011852.077	-931986.1203	-594895.3434	-811061.9239	-863051.7842	-950634.5185	-859648.3646	-599319.4052	-811477.6567	-854003.3969	-874415.8029	-759195.3053	-745744.3586	-862303.0569	-916119.7098	-954651.0846	-843997.5012	-705128.2097	-916592.1566	-971887.806	-1081567.904
356	-530105.4358	-757086.6452	-854300.2239	-829783.8135	-720338.2531	-562079.5322	-857112.5884	-927401.0195	-842895.8799	-691913.2272	-525260.3857	-806366.8298	-866711.551	-798364.9155	-654797.4496	-529488.8254	-763335.8831	-809071.3899	-783809.2964	-659883.1066	-647191.6871	-835939.5443	-902993.7229	-860620.148	-736778.5133	-636896.3441	-928687.7355	-996083.531	-910416.7214	-757317.4374	-599261.5385	-876475.3555	-934375.4662	-865387.7788	-719646.295	-597061.4884	-827188.5268	-871342.8734	-845378.3138	-718830.9969	-764277.9384	-914792.4458	-951687.1542	-891456.4226	-753218.7735	-711713.0936	-1000262.825	-1064766.032	-977937.563
357	-532738.9186	-727082.6324	-789660.4155	-869507.7831	-817694.7544	-557752.1275	-775204.1499	-830649.6366	-939928.2214	-863239.9724	-521838.2313	-741304.7416	-793763.3557	-881162.3659	-793413.1804	-532346.8324	-747909.0754	-791530.864	-812898.9973	-700684.9795	-639307.2335	-794713.7039	-852755.0966	-911392.0347	-830010.7952	-631513.6935	-845936.1246	-901206.3275	-1009609.31	-928930.3298	-595023.9622	-811125.0689	-862937.0159	-948804.6152	-857228.7298	-599374.6971	-811481.4194	-853956.7464	-873868.5518	-758553.9327	-745875.5488	-862344.7757	-915849.7149	-953276.2199	-842326.836	-705275.1965	-916668.0368	-971763.0182	-1079290.399
358	-529311.8048	-763961.9071	-866653.3733	-834778.8295	-720531.2731	-561190.2757	-871671.8287	-946434.3879	-847536.1382	-691173.8374	-524501.2401	-817991.9302	-881567.0389	-801666.0259	-653862.5085	-528354.519	-766226.3468	-812870.8322	-784071.6582	-658954.9567	-647856.2467	-844136.457	-913980.7905	-864429.3662	-737141.5539	-636295.2287	-943504.0307	-1015077.389	-915009.715	-756655.1908	-598722.7595	-888219.0101	-949132.3881	-868663.7632	-718800.0291	-596045.0981	-830130.333	-875129.7625	-845685.4819	-717989.0989	-766400.6886	-924311.0099	-961308.1392	-894079.8433	-753751.835	-711400.1192	-1015336.176	-1083720.378	-982483.2917
359	-533415.7785	-724362.625	-789464.6576	-840632.4716	-774683.3966	-561692.7536	-777476.5068	-829104.6696	-886813.5095	-790034.9615	-525083.3236	-742970.8186	-791435.6054	-837356.4942	-734960.734	-533710.3372	-747995.3124	-790447.2613	-799575.8502	-684983.5547	-641223.5707	-793855.4787	-849409.8184	-880418.0151	-788410.9732	-635251.9102	-847984.9612	-898932.9421	-955658.9678	-855422.4936	-598117.9196	-812644.0405	-860176.2335	-904785.8151	-799023.7858	-600704.7587	-811571.9329	-852834.5553	-860704.2849	-743125.548	-749031.363	-863348.3325	-909354.9165	-920203.4939	-802138.5498	-708811.004	-918493.3532	-968761.2145	-1024504.426
360	-532121.6587	-710460.3862	-859097.7349	-930820.7034	-769648.7096	-553521.8429	-781548.8074	-976641.1626	-1015934.044	-744142.0799	-516696.7466	-746929.8942	-909014.3502	-936428.3301	-694584.6064	-526910.6982	-744374.513	-820911.7572	-824254.5374	-667210.6888	-641599.8729	-798336.3383	-928545.83	-953930.2306	-773592.8581	-627985.7952	-854304.5216	-1048204.763	-1083387.731	-808429.5949	-590610.2205	-818220.5725	-978312.0461	-1002520.016	-758446.5777	-594617.8161	-808773.91	-883542.968	-885276.3108	-725928.7027	-751078.087	-886212.2905	-997993.8627	-977039.6953	-777537.0091	-702449.6863	-927060.1735	-1119768.374	-1150841.438
361	-532176.8111	-710725.3096	-857317.7266	-927576.9021	-768366.8431	-553859.1514	-781519.5817	-972832.6808	-1010903.942	-742911.0113	-517016.7456	-746883.6758	-905943.2447	-932468.7689	-693696.6775	-527128.5903	-744469.5639	-820100.2854	-823189.1668	-667148.6107	-641653.1143	-798194.0721	-926420.5218	-951042.3711	-772606.457	-628293.4222	-854210.7291	-1044328.201	-1078365.683	-807216.6163	-590902.8791	-818128.3339	-975212.5551	-998587.544	-757571.8847	-594816.459	-808848.1446	-882724.0184	-884218.8657	-725860.9045	-751129.4174	-885662.8346	-995523.2546	-974507.7776	-776846.0733	-702727.6318	-926901.8141	-1115823.731	-1145827.442
362	-531742.4951	-708639.0808	-871335.0062	-953121.3166	-778461.3354	-551202.9013	-781749.7294	-1002823.862	-1050515.188	-752605.4784	-514496.8054	-747247.6378	-930127.7066	-963649.6769	-700688.9744	-525412.7254	-743721.0536	-826490.4952	-831578.7892	-667637.4654	-641233.8468	-799314.3958	-943156.9824	-973783.8009	-780374.207	-625870.9091	-854949.3303	-1074855.506	-1117913.508	-816768.6272	-588598.2397	-818854.6977	-999620.5484	-1029555.126	-764459.9514	-593252.1782	-808263.5596	-889173.1146	-892546.076	-726394.8039	-750725.1986	-889989.7109	-1014978.896	-994446.2226	-782287.0815	-700538.8559	-928148.8689	-1146887.161	-1185311.852
363	-532860.252	-726595.0457	-789625.3241	-864331.6142	-809984.5674	-558458.5215	-775611.4911	-830372.6868	-930406.914	-850117.2915	-522419.9444	-741603.4015	-793346.0847	-873309.7549	-782935.0343	-532591.2533	-747924.5342	-791336.6181	-810510.6989	-697870.3527	-639650.7548	-794559.859	-852155.4243	-905839.6529	-822553.6391	-632183.8037	-846303.3977	-900798.802	-999938.2083	-915753.3647	-595578.5829	-811397.3588	-862442.1199	-940913.8348	-846794.9508	-599613.123	-811497.6448	-853755.5831	-871508.7342	-755788.2508	-746441.2579	-862524.6726	-914685.4617	-947347.6254	-835122.7109	-705909.023	-916995.2418	-971224.9169	-1069469.503
364	-529200.8385	-764923.2135	-868380.6037	-835477.2379	-720558.2613	-561065.9389	-873707.517	-949095.6535	-848184.944	-691070.4551	-524395.0955	-819617.364	-883644.1489	-802127.5906	-653731.7841	-528195.9191	-766630.4945	-813402.0742	-784108.342	-658825.1818	-647949.1661	-845282.558	-915517.0139	-864961.9751	-737192.3147	-636211.1801	-945575.6607	-1017733.13	-915651.9122	-756562.5947	-598647.4268	-889861.0202	-951195.7165	-869121.8148	-718681.7033	-595902.9853	-830541.6595	-875659.2493	-845728.4305	-717871.3838	-766697.4938	-925641.9056	-962653.3555	-894446.6528	-753826.3682	-711356.3588	-1017443.748	-1086370.595	-983118.8803
365	-617433.5138	-806588.3815	-818258.0334	-797302.2506	-710710.7029	-712725.7661	-921383.378	-858024.5024	-810714.2956	-685345.3282	-641603.9263	-853122.3497	-808699.4142	-770737.6832	-648034.5021	-557361.206	-770096.4652	-785925.5313	-770773.2028	-654254.3502	-730729.6658	-873650.3097	-869988.3992	-839752.6887	-730255.2608	-787222.1537	-991558.2493	-926878.304	-879381.7974	-751151.884	-714793.4756	-922230.1386	-877096.9384	-838958.0594	-713373.1162	-624844.36	-834119.686	-849101.8333	-833255.7011	-713728.9537	-844025.825	-940712.2379	-921718.7043	-882203.0642	-749799.8189	-861718.4789	-1061733.058	-995732.1056	-948049.2992
366	-532157.2543	-729420.0897	-789828.6414	-894321.9832	-854656.8644	-554365.723	-773251.3842	-831977.3147	-985572.7192	-926149.2086	-519049.5386	-739872.9868	-795763.7241	-918807.2471	-843644.6975	-531175.0949	-747834.9671	-792462.0656	-824348.3366	-714178.1083	-637660.4158	-795451.2258	-855629.8847	-938009.7743	-865759.892	-628301.231	-844175.4425	-903159.9771	-1055971.913	-992099.801	-592365.1483	-809819.7301	-865309.5135	-986632.4777	-907247.554	-598231.6993	-811403.636	-854921.1091	-885181.3564	-771812.4225	-743163.5779	-861482.3621	-921431.0652	-981697.4975	-876862.9197	-702236.6757	-915099.4384	-974342.6391	-1126371.107
367	-582892.1561	-770975.0937	-806191.7947	-799862.6606	-714287.7619	-652089.6075	-862815.5611	-845184.283	-813926.5967	-689692.2264	-594933.2611	-808253.2441	-800282.8604	-774989.1712	-652890.4605	-548265.0732	-760961.1486	-787224.5604	-775614.486	-658624.2695	-694571.0632	-840042.4247	-859650.7067	-840083.81	-732170.5593	-726088.4115	-933009.4917	-914053.408	-882221.1995	-755162.7819	-667977.6239	-877517.2695	-868591.3692	-842767.0645	-717831.515	-615527.3115	-824801.126	-850052.4529	-837619.425	-717691.2696	-806249.9744	-909109.7557	-913109.5572	-880304.8968	-750053.3569	-800087.153	-1003203.36	-982922.533	-950515.8023
368	-532941.8135	-714399.9843	-832627.7482	-882583.0759	-750586.4461	-558537.8592	-781114.2005	-920006.3379	-941132.8588	-725835.217	-521455.3578	-746242.5947	-863344.8336	-877546.8467	-681380.4747	-530150.9075	-745787.9868	-808844.5963	-808411.7205	-666287.5441	-642391.6102	-796220.7385	-896940.9894	-910985.7106	-758924.3742	-632560.4267	-852909.7599	-990557.5335	-1008706.306	-790391.7439	-594962.2613	-816848.9198	-932220.4167	-944041.3728	-745439.2725	-597571.7767	-809877.8301	-871364.6071	-869551.3518	-724920.4964	-751841.4069	-878041.4927	-961254.1681	-939388.2829	-767262.3039	-706582.9325	-924705.2568	-1061108.735	-1076279.767
369	-533321.323	-724742.2007	-789491.9755	-844662.0079	-780685.6116	-561142.841	-777159.4004	-829320.269	-894225.6429	-800250.6868	-524630.4725	-742738.3183	-791760.4419	-843469.5833	-743117.7458	-533520.0608	-747983.2781	-790598.4775	-801435.0892	-687174.6813	-640956.1467	-793975.2436	-849876.6504	-884740.4252	-794216.2091	-634730.2438	-847699.047	-899250.192	-963187.7131	-865680.4781	-597686.1593	-812432.0687	-860561.4994	-910928.6183	-807146.2588	-600519.1493	-811559.3018	-852991.1565	-862541.3522	-745278.572	-748590.9706	-863208.2866	-910261.2626	-924818.7775	-807746.8065	-708317.5837	-918238.6311	-969180.1148	-1032149.783
370	-532387.625	-711737.9502	-850513.8386	-915177.8246	-763467.0482	-555148.4763	-781407.8697	-958275.1744	-991676.9252	-738205.3858	-518239.9067	-746707.0113	-894204.2787	-917333.7777	-690302.6663	-527961.4589	-744832.8855	-816998.5229	-819116.9036	-666911.3242	-641856.6237	-797650.2749	-918296.7627	-940003.8425	-768836.0463	-629469.2928	-853852.2173	-1029510.464	-1059169.449	-802580.1381	-592021.5346	-817775.7621	-963365.0885	-983556.0996	-754228.466	-595575.7497	-809131.8979	-879593.6729	-880176.8969	-725601.7536	-751325.6224	-883562.5996	-986079.6244	-964829.7979	-774205.0465	-703790.048	-926296.5025	-1100745.763	-1126661.99
371	-533480.008	-716985.1916	-815257.8536	-850929.0174	-738077.5805	-561829.4239	-780829.0068	-882841.9468	-892047.5031	-713822.0534	-524578.0105	-745791.5814	-833375.9975	-838908.1735	-672715.7792	-532277.1683	-746715.5238	-800925.9933	-798015.4908	-665681.7665	-642911.1569	-794832.4588	-876201.5475	-882805.0472	-749298.7547	-635562.3499	-851994.502	-952728.7911	-959699.5392	-778555.1089	-597818.1181	-815948.8263	-901974.5857	-905667.0482	-736903.7366	-599510.1979	-810602.2344	-863373.0336	-859232.4618	-724258.9004	-752342.3057	-872679.7259	-937145.1789	-914681.0145	-760519.93	-709295.2139	-923159.9348	-1022615.639	-1027351.583
372	-532136.7818	-739489.0018	-822681.6003	-816998.7717	-719844.2071	-564355.6372	-819847.3435	-878683.9764	-831018.8616	-693805.7397	-527203.4644	-776611.6911	-828688.0424	-789915.5263	-657190.487	-532392.1504	-755937.5686	-799346.4905	-783137.7656	-662258.7616	-645490.7071	-814959.0566	-874871.667	-850870.2266	-735849.289	-638434.9349	-890764.5432	-947467.617	-898660.6801	-759012.4971	-600640.5756	-846416.7701	-896604.2433	-857002.7012	-721812.3632	-599663.0003	-819658.7981	-861650.1046	-844592.0986	-720985.885	-758844.6324	-890429.1127	-927061.6686	-884741.6204	-751854.371	-712514.1702	-961681.6831	-1016251.252	-966302.4987
373	-640168.0989	-830028.4942	-826199.8442	-795617.0286	-708356.3382	-752635.5437	-959931.8052	-866475.7353	-808600.009	-682484.2674	-672321.8331	-882654.498	-814239.0591	-767939.4199	-644838.3856	-563348.1393	-776109.1888	-785070.5305	-767586.7454	-651378.1372	-754528.6964	-895770.4975	-876792.5078	-839534.7498	-728994.641	-827459.4332	-1030094.132	-935319.4513	-877512.9471	-748511.9733	-745606.9419	-951659.4543	-882695.1719	-836451.0314	-710438.6674	-630976.6965	-840253.0175	-848476.1503	-830383.5658	-711121.019	-868889.3031	-961512.5008	-927385.1111	-883452.4085	-749632.9441	-902283.2602	-1100256.396	-1004163.167	-946425.8852
374	-532634.5464	-712924.0323	-842544.6046	-900655.0768	-757728.0337	-556658.6322	-781277.024	-941224.3093	-969156.7721	-732693.7973	-519672.5665	-746500.0883	-880454.7038	-899606.5183	-686327.3407	-528936.9783	-745258.4355	-813365.5015	-814347.1575	-666633.3959	-642094.9895	-797013.3381	-908781.5947	-927074.6736	-764419.8529	-630846.5625	-853432.3009	-1012154.798	-1036685.352	-797149.5402	-593331.7896	-817362.8031	-949488.4295	-965950.1221	-750312.3984	-596465.0892	-809464.2516	-875927.1729	-875442.6339	-725298.2161	-751555.4327	-881102.6438	-975018.5224	-953494.2079	-771111.674	-705034.4312	-925587.5153	-1083085.294	-1104213.947
375	-532896.427	-714181.971	-834092.5701	-885252.4968	-751641.3322	-558260.278	-781138.2512	-923140.451	-945272.2797	-726848.3	-521192.0211	-746280.6292	-865872.1378	-880805.2876	-682111.1778	-529971.5977	-745709.7666	-809512.3806	-809288.4457	-666338.63	-642347.7963	-796337.8136	-898689.9689	-913362.2163	-759736.1131	-632307.2713	-852986.9446	-993747.6721	-1012839.1	-791389.9401	-594721.4239	-816924.8257	-934771.0802	-947277.521	-746159.0834	-597408.3075	-809816.7403	-872038.5451	-870421.5549	-724976.2895	-751799.1656	-878493.6563	-963287.3051	-941471.8734	-767830.8955	-706354.2029	-924835.5755	-1064354.9	-1080405.933
376	-533535.7932	-717253.1549	-813457.4201	-847647.9942	-736781.0049	-562170.603	-780799.4457	-878989.7637	-886959.6819	-712576.8586	-524901.6813	-745744.8327	-830269.6519	-834903.1774	-671817.6616	-532497.5606	-746811.6653	-800105.2101	-796937.8953	-665618.9761	-642965.0092	-794688.5601	-874051.8519	-879884.0502	-748301.035	-635873.5068	-851899.6332	-948807.7464	-954619.8639	-777328.2118	-598114.1349	-815855.5294	-898839.5288	-901689.4524	-736019.0067	-599711.1202	-810677.3208	-862544.6868	-858162.8828	-724190.3243	-752394.2252	-872123.9652	-934646.2212	-912120.0436	-759821.0659	-709576.3487	-922999.7582	-1018625.733	-1022280.053
377	-586579.446	-774776.8122	-807479.8656	-799589.3368	-713905.9108	-658562.5174	-869067.6755	-846554.9764	-813583.6835	-689228.195	-599915.3546	-813043.0211	-801181.3275	-774535.3249	-652372.087	-549236.0854	-761936.3436	-787085.8891	-775097.679	-658157.7806	-698430.994	-843630.0664	-860754.2553	-840048.4628	-731966.1012	-732614.4385	-939259.5715	-915422.4657	-881918.0933	-754734.6186	-672975.2161	-882290.3683	-869499.3387	-842360.4532	-717355.5809	-616521.9064	-825795.8823	-849950.9742	-837153.5975	-717268.2924	-810282.5464	-912483.3207	-914028.5837	-880507.5262	-750026.2917	-806666.297	-1009451.405	-984289.9549	-950252.5031
378	-532239.4232	-729089.8882	-789804.8769	-890816.5987	-849435.4023	-554844.1043	-773527.2421	-831789.7599	-979124.7373	-917262.3189	-519443.484	-740075.244	-795481.1415	-913489.3331	-836548.7292	-531340.6207	-747845.436	-792330.5192	-822730.9427	-712271.998	-637893.0539	-795347.0396	-855223.777	-934249.6124	-860709.7865	-628755.0403	-844424.1658	-902883.9943	-1049422.488	-983176.1492	-592740.7463	-810004.1292	-864974.362	-981288.7148	-900181.6317	-598393.1652	-811414.6241	-854784.8781	-883583.2501	-769939.4585	-743546.6852	-861604.1912	-920642.6143	-977682.5583	-871984.1708	-702665.9132	-915321.0269	-973978.2282	-1119720.238
379	-525145.9336	-800051.0415	-931496.6442	-860998.3114	-721544.4595	-556522.4542	-948095.1543	-1046342.988	-871893.4513	-687292.685	-520516.3868	-879013.5781	-959545.4067	-818993.9792	-648954.8827	-522400.3987	-781398.7626	-832814.5937	-785448.8293	-654082.9786	-651344.6056	-887163.1067	-971653.3226	-884424.4424	-739047.2011	-633139.8965	-1021276.67	-1114778.594	-939118.9291	-753178.9731	-595894.639	-949862.9643	-1026593.37	-885859.8267	-714357.8703	-590709.9341	-845572.2524	-895007.6307	-847297.8469	-713569.8681	-777543.2777	-974275.1775	-1011809.927	-907850.5165	-756549.943	-709757.2764	-1094458.135	-1183214.178	-1006344.407
380	-532651.7242	-713006.5457	-841990.2012	-899644.7589	-757328.7822	-556763.6907	-781267.9213	-940038.1154	-967590.0911	-732310.3673	-519772.2337	-746485.693	-879498.1739	-898373.269	-686050.7854	-529004.8432	-745288.0401	-813112.7596	-814015.336	-666614.061	-642111.5721	-796969.0277	-908119.6439	-926175.2177	-764112.6273	-630942.3763	-853403.0881	-1010947.4	-1035121.179	-796771.7445	-593422.9414	-817334.0743	-948523.0586	-964725.3102	-750039.9655	-596526.9587	-809487.3728	-875672.102	-875113.2809	-725277.0997	-751571.4201	-880931.5097	-974249.0241	-952705.6141	-770896.4744	-705121.0004	-925538.1925	-1081856.691	-1102652.283
381	-602081.9246	-790760.3828	-812895.3044	-798440.2013	-712300.4939	-685776.5823	-895353.4496	-852317.7848	-812141.9733	-687277.2672	-620861.5777	-833180.6878	-804958.7542	-772627.218	-650192.6882	-553318.5133	-766036.3577	-786502.8729	-772924.8667	-656196.5207	-714659.307	-858713.5939	-865393.9067	-839899.8525	-731106.4976	-760051.8234	-965536.7917	-921178.3967	-880643.7436	-752934.4907	-693986.6003	-902357.9145	-873316.7163	-840650.9368	-715354.6106	-620703.4833	-829978.1376	-849524.3274	-835195.1181	-715489.9686	-827236.6951	-926666.8049	-917892.4479	-881359.4412	-749912.5015	-834327.0021	-1035720.071	-990039.0087	-949145.5139
382	-533718.4914	-718130.7421	-807560.9501	-836902.5516	-732534.6838	-563287.9737	-780702.6324	-866373.7564	-870296.9253	-708498.811	-525961.7124	-745591.7294	-820096.2832	-821786.7031	-668876.3013	-533219.3515	-747126.5316	-797417.1222	-793408.74	-665413.3359	-643141.3771	-794217.2878	-867011.5388	-870317.7034	-745033.4748	-636892.5545	-851588.9353	-935966.2152	-937983.7853	-773310.0894	-599083.5981	-815549.9792	-888572.13	-888662.7151	-733121.4917	-600369.1462	-810923.2307	-859831.8279	-854659.9816	-723965.7357	-752564.2628	-870303.8335	-926462.065	-903732.7926	-757532.2664	-710497.0731	-922475.1756	-1005558.677	-1005670.651
383	-533631.903	-717714.8164	-810355.5367	-841995.2715	-734547.195	-562758.4044	-780748.5164	-872353.0161	-878194.1107	-710431.5703	-525459.3188	-745664.2915	-824917.8731	-828003.1553	-670270.3364	-532877.2643	-746977.3031	-798691.1208	-795081.356	-665510.7975	-643057.7889	-794440.6437	-870348.2411	-874851.5999	-746582.1098	-636409.5847	-851736.1882	-942052.3602	-945868.3269	-775214.4476	-598624.1285	-815694.7923	-893438.2848	-894836.6371	-734494.7467	-600057.2798	-810806.6836	-861117.5665	-856320.1547	-724072.1778	-752483.6748	-871166.4709	-930340.883	-907707.8658	-758617.0253	-710060.7028	-922723.7975	-1011751.707	-1013542.549
384	-528108.7859	-774383.7158	-885378.7924	-842350.4831	-720823.8607	-559842.3037	-893741.3322	-975285.9614	-854570.0353	-690053.0394	-523350.4954	-835613.7422	-904085.6071	-806669.9867	-652445.2859	-526635.09	-770607.8322	-818630.1853	-784469.3573	-657548.0284	-648863.6139	-856561.6792	-930635.446	-870203.5379	-737691.8661	-635384.0329	-965963.1888	-1043869.071	-921971.9662	-755651.3297	-597906.0558	-906020.5315	-971501.5458	-873629.637	-717517.2239	-594504.4111	-834589.6456	-880870.0869	-846151.1001	-716712.9148	-769618.4419	-938739.6463	-975892.0295	-898056.5339	-754559.8717	-710925.6996	-1038184.99	-1112452.166	-989373.897
385	-532139.7902	-729490.2704	-789833.6923	-895067.0134	-855766.6277	-554264.0484	-773192.7537	-832017.1774	-986943.1655	-928038.0175	-518965.81	-739829.9993	-795823.7838	-919937.5101	-845152.8661	-531139.9143	-747832.742	-792490.0244	-824692.0955	-714583.2307	-637610.9712	-795473.3694	-855716.1984	-938808.9546	-866833.2354	-628204.7789	-844122.5792	-903218.6341	-1057363.92	-993996.4233	-592285.3191	-809780.5382	-865380.7462	-987768.2346	-908749.3366	-598197.3816	-811401.3006	-854950.0635	-885521.016	-772210.5	-743082.1527	-861456.4687	-921598.6416	-982550.8279	-877899.8431	-702145.4461	-915052.3423	-974420.0905	-1127784.674
386	-531774.0795	-708790.7957	-870315.6403	-951263.6734	-777727.2429	-551396.0694	-781732.9925	-1000642.841	-1047634.575	-751900.4765	-514680.0607	-747221.1697	-928368.962	-961382.1361	-700180.48	-525537.5067	-743775.4868	-826025.7858	-830968.6784	-667601.9149	-641264.3368	-799232.9236	-941939.872	-972129.9966	-779809.32	-626047.0793	-854895.6177	-1072635.496	-1115037.507	-816073.985	-588765.8379	-818801.875	-997845.5481	-1027303.099	-763959.0368	-593365.9359	-808306.0718	-888704.1228	-891940.5039	-726355.9776	-750754.5942	-889675.0514	-1013564.041	-992996.2573	-781891.4	-700698.0283	-928058.1805	-1144628.163	-1182440.463
387	-533648.4111	-723427.7753	-789397.3769	-830708.2066	-759900.6604	-563047.1222	-778257.5017	-828573.674	-868558.3133	-764874.8545	-526198.6417	-743543.4389	-790635.5721	-822300.6884	-714870.9917	-534178.9654	-748024.9515	-790074.8337	-794996.7674	-679587.0726	-641882.2038	-793560.512	-848260.067	-869772.4372	-774113.3731	-636536.712	-848689.1336	-898151.5937	-937116.5706	-830158.3074	-599181.2935	-813166.1016	-859227.3698	-889656.8273	-779019.1085	-601161.8927	-811603.0418	-852448.8652	-856179.8082	-737822.9082	-750115.9968	-863693.2488	-907122.6947	-908836.6036	-788326.0858	-710026.2391	-919120.7031	-967729.5132	-1005674.828
388	-636229.6231	-825967.7948	-824824.0272	-795908.9717	-708764.2017	-745721.6857	-953253.7838	-865011.6674	-808966.2821	-682979.9095	-667000.3491	-877538.4314	-813279.3865	-768424.1832	-645392.0719	-562310.9797	-775067.5614	-785218.6484	-768138.7584	-651876.4042	-750405.8191	-891938.4582	-875613.7831	-839572.5049	-729213.0272	-820488.8397	-1023418.284	-933857.1306	-877836.7015	-748969.304	-740268.9034	-946561.2022	-881725.3496	-836885.3419	-710947.0231	-629914.3477	-839190.4963	-848584.5419	-830881.1265	-711572.8103	-864582.0238	-957909.1216	-926403.4787	-883235.9756	-749661.853	-895255.9312	-1093582.721	-1002702.594	-946707.1209
389	-670048.5301	-860836.2118	-836637.8941	-793402.1141	-705261.9587	-805089.607	-1010596.624	-877583.3268	-805821.168	-678723.929	-712694.8727	-921469.076	-821519.9036	-764261.6173	-640637.6783	-571216.8621	-784011.8081	-783946.7891	-763398.7332	-647597.8841	-785808.1455	-924843.4165	-885735.2573	-839248.3092	-727337.7882	-880343.9375	-1080742.463	-946413.7871	-875056.687	-745042.2961	-786105.5769	-990338.878	-890053.0204	-833156.0041	-706581.8741	-639036.5252	-848314.1538	-847653.805	-826608.6722	-707693.3684	-901567.7726	-988850.6212	-934832.5609	-885094.4418	-749413.6178	-955598.2054	-1150888.24	-1015244.247	-944292.206
390	-531772.6393	-708783.8776	-870362.1227	-951348.3806	-777760.717	-551387.261	-781733.7557	-1000742.294	-1047765.929	-751932.6241	-514671.7044	-747222.3766	-928449.1596	-961485.5344	-700203.667	-525531.8168	-743773.0047	-826046.9763	-830996.499	-667603.536	-641262.9465	-799236.6386	-941995.3714	-972205.4089	-779835.0784	-626039.0461	-854898.067	-1072736.727	-1115168.651	-816105.6602	-588758.1955	-818804.2837	-997926.4869	-1027405.79	-763981.8782	-593360.7486	-808304.1333	-888725.5085	-891968.1175	-726357.7481	-750753.2538	-889689.3997	-1013628.558	-993062.3747	-781909.4428	-700690.7701	-928062.3158	-1144731.172	-1182571.396
391	-532953.5169	-714456.2011	-832250.0298	-881894.7401	-750314.4336	-558609.4362	-781107.9988	-919198.1767	-940065.4693	-725573.9838	-521523.2617	-746232.7872	-862693.1439	-876706.6264	-681192.0559	-530197.1443	-745808.1566	-808672.4017	-808185.6484	-666274.3711	-642402.908	-796190.5496	-896489.9982	-910372.9058	-758715.0595	-632625.7053	-852889.8571	-989734.9256	-1007640.626	-790134.3494	-595024.3636	-816829.3468	-931562.7036	-943206.9009	-745253.6623	-597613.9288	-809893.5826	-871190.8257	-869326.9616	-724906.1096	-751852.2992	-877924.898	-960729.9042	-938851.009	-767115.687	-706641.9126	-924671.6529	-1060271.681	-1075215.795
392	-532278.712	-728932.0036	-789793.514	-889140.5125	-846938.78	-555072.8406	-773659.1426	-831700.0813	-976041.6593	-913013.0864	-519631.8475	-740171.9526	-795346.0257	-910946.5928	-833155.8189	-531419.7663	-747850.4417	-792267.6208	-821957.5919	-711360.5985	-638004.289	-795297.2233	-855029.5982	-932451.7053	-858295.0978	-628972.0276	-844543.0918	-902752.0341	-1046290.905	-978909.339	-592920.3371	-810092.2989	-864814.1106	-978733.6149	-896803.0879	-598470.3695	-811419.878	-854719.7398	-882819.1216	-769043.9078	-743729.8664	-861662.4433	-920265.6195	-975762.8304	-869651.4156	-702871.1514	-915426.9785	-973803.9866	-1116540.151
393	-532041.8495	-729883.8518	-789862.0182	-899245.2317	-861990.3127	-553693.8452	-772863.9467	-832240.732	-994628.7922	-938630.6831	-518496.2495	-739588.9202	-796160.6061	-926276.1603	-853610.8557	-530942.617	-747820.2637	-792646.8202	-826619.9368	-716855.2056	-637333.6798	-795597.5534	-856200.2556	-943290.8532	-872852.6731	-627663.864	-843826.1153	-903547.5899	-1065170.461	-1004632.907	-591837.6277	-809560.7451	-865780.2276	-994137.6952	-917171.5129	-598004.9235	-811388.2035	-855112.443	-887425.8675	-774442.9663	-742625.5107	-861311.2554	-922538.4301	-987336.4064	-883715.0335	-701633.8196	-914788.2215	-974854.4474	-1135712.13
394	-628777.9576	-818284.88	-822220.9571	-796461.3333	-709535.8867	-732640.5447	-940618.8496	-862241.6252	-809659.2772	-683917.6732	-656932.0076	-867858.7434	-811463.6692	-769341.3639	-646439.656	-560348.6556	-773096.7841	-785498.8902	-769183.1766	-652819.1343	-742605.2626	-884688.1724	-873383.6152	-839643.9383	-729626.2178	-807300.3542	-1010787.461	-931090.3941	-878449.2505	-749834.5818	-730169.2406	-936915.2194	-879890.4288	-837707.065	-711908.841	-627904.3651	-837180.1876	-848789.6206	-831822.52	-712427.6074	-856432.5757	-951091.4647	-924546.2129	-882826.4807	-749716.5492	-881960.1011	-1080956.011	-999939.163	-947239.2238
395	-526573.6464	-787682.6998	-909273.7856	-852012.4624	-721197.2238	-558122.1936	-921903.6199	-1012102.662	-863545.7983	-688622.8199	-521882.0618	-858100.4527	-932820.9337	-813055.4038	-650636.8071	-524440.9739	-776198.9254	-825979.5376	-784976.8501	-655752.6859	-650149.0875	-872417.1641	-951887.9945	-877571.7999	-738394.1044	-634221.2809	-994622.7038	-1080609.347	-930856.3037	-754370.3302	-596863.8826	-928736.5643	-1000046.214	-879966.4521	-715880.2714	-592538.3828	-840280.0519	-888195.1573	-846745.2628	-715084.4114	-773724.5286	-957151.633	-994502.1315	-903131.0797	-755590.9852	-710320.3057	-1067341.735	-1149116.012	-998166.8092
396	-533585.243	-717490.6859	-811861.4593	-844739.5923	-735631.6797	-562473.0347	-780773.2419	-875575.0677	-882449.6775	-711473.0789	-525188.5933	-745703.3932	-827516.0896	-831353.0231	-671021.5419	-532692.9232	-746896.8882	-799377.6421	-795982.6809	-665563.3167	-643012.7456	-794561.0037	-872146.2943	-877294.7868	-747416.6248	-636149.3261	-851815.5385	-945332.0092	-950117.0803	-776240.6516	-598376.5335	-815772.828	-896060.5161	-898163.5867	-735234.7544	-599889.224	-810743.8797	-861810.4142	-857214.7744	-724129.5363	-752440.2482	-871631.3215	-932431.0667	-909849.9187	-759201.5708	-709825.5554	-922857.7727	-1015088.954	-1017784.49
397	-532392.2342	-711760.0903	-850365.0798	-914906.7338	-763359.9202	-555176.6658	-781405.4272	-957956.8921	-991256.5497	-738102.503	-518266.6496	-746703.1487	-893947.6204	-917002.8694	-690228.4603	-527979.6686	-744840.829	-816930.7067	-819027.8685	-666906.1362	-641861.0732	-797638.3854	-918119.1465	-939762.4985	-768753.6108	-629495.0018	-853844.3789	-1029186.493	-1058749.746	-802478.7671	-592045.9927	-817768.0536	-963106.058	-983227.4552	-754155.3662	-595592.3507	-809138.1019	-879525.2317	-880088.5241	-725596.0876	-751329.9122	-883516.6805	-985873.1508	-964618.2006	-774147.3037	-703813.2765	-926283.2681	-1100416.102	-1126242.961
398	-533504.6707	-717103.6582	-814461.882	-849478.4771	-737504.3644	-561980.2592	-780815.9378	-881138.8967	-889798.1775	-713271.5528	-524721.1053	-745770.9138	-832002.6822	-837137.5649	-672318.7214	-532374.6037	-746758.0279	-800563.1251	-797539.0859	-665654.0069	-642934.965	-794768.8412	-875251.1671	-881513.6745	-748857.6629	-635699.9124	-851952.5605	-950995.2974	-957453.8149	-778012.6977	-597948.9872	-815907.5797	-900588.5771	-903908.5532	-736512.5976	-599599.0257	-810635.4301	-863006.8215	-858759.601	-724228.5829	-752365.2593	-872434.0241	-936040.3898	-913548.8093	-760210.9622	-709419.5035	-923089.1207	-1020851.702	-1025109.46
399	-597398.9124	-785932.0416	-811259.4005	-798787.3339	-712785.4607	-677555.7164	-887413.0032	-850576.9469	-812577.4873	-687866.6064	-614534.111	-827097.471	-803817.6634	-773203.6218	-650851.0443	-552085.2873	-764797.8192	-786678.9913	-773581.2331	-656788.9811	-709757.0336	-854157.1391	-863992.3538	-839944.7449	-731366.168	-751763.4967	-957598.9293	-919439.6364	-881028.7011	-753478.2761	-687639.4496	-896295.8798	-872163.5571	-841167.3501	-715959.0667	-619440.3063	-828714.7556	-849653.2096	-835786.7385	-716027.1674	-822115.1603	-922382.2366	-916725.246	-881102.0934	-749946.8754	-825971.2145	-1027784.793	-988302.3258	-949479.9149
400	-650222.7394	-840395.1628	-829712.2045	-794871.7191	-707315.0924	-770286.1174	-976980.3055	-870213.3935	-807664.9406	-681218.9292	-685907.1927	-895715.4417	-816689.0329	-766701.8547	-643424.8651	-565995.9317	-778768.3872	-784692.3962	-766177.4968	-650106.0978	-765054.1007	-905553.4136	-879801.7057	-839438.3637	-728437.1169	-845254.8484	-1047137.084	-939052.649	-876686.4258	-747344.4414	-759234.5638	-964674.9192	-885171.0573	-835342.2685	-709140.8726	-633688.7953	-842965.5562	-848199.4345	-829113.3299	-709967.6289	-879885.4718	-970711.6644	-929891.147	-884004.9458	-749559.1417	-920223.517	-1117293.801	-1007891.904	-945707.9111
401	-533639.2389	-717750.0541	-810118.776	-841563.8102	-734376.6926	-562803.2702	-780744.629	-871846.446	-877525.0517	-710267.8246	-525501.8822	-745658.144	-824509.3822	-827476.49	-670152.2321	-532906.2463	-746989.9459	-798583.1861	-794939.65	-665502.5404	-643064.8706	-794421.7207	-870065.5517	-874467.4827	-746450.9076	-636450.5025	-851723.7127	-941536.7346	-945200.339	-775053.1081	-598663.0553	-815682.5236	-893026.0183	-894313.575	-734378.4029	-600083.7015	-810816.5576	-861008.6372	-856179.5028	-724063.1599	-752490.5023	-871093.3873	-930012.2648	-907371.0928	-758525.1233	-710097.6726	-922702.7339	-1011227.026	-1012875.632
402	-525444.4858	-797464.6697	-926849.572	-859119.2602	-721471.8483	-556856.9793	-942618.1833	-1039182.916	-870147.8547	-687570.8325	-520801.9662	-874640.3872	-953956.9918	-817752.1503	-649306.5937	-522827.108	-780311.4129	-831385.2997	-785350.1327	-654432.1349	-651094.6081	-884079.5494	-967520.1502	-882991.4708	-738910.6306	-633366.0273	-1015702.999	-1107633.386	-937391.1129	-753428.1005	-596097.3197	-945445.1751	-1021042.034	-884627.4498	-714676.223	-591092.2852	-844465.5884	-893583.059	-847182.2948	-713886.5776	-776744.7304	-970694.4344	-1008190.655	-906863.6244	-756349.4132	-709875.0128	-1088787.763	-1176083.834	-1004634.371
403	-664217.3056	-854824.0255	-834600.8883	-793834.359	-705865.8329	-794853.0941	-1000709.286	-875415.6586	-806363.4643	-679457.7664	-704815.9952	-913894.3352	-820099.0326	-764979.3477	-641457.4546	-569681.2655	-782469.5965	-784166.0895	-764216.032	-648335.6079	-779703.8999	-919169.7796	-883990.0623	-839304.2086	-727661.1262	-870023.4231	-1070858.342	-944248.7058	-875536.031	-745719.4104	-778202.1892	-982790.5129	-888617.1219	-833799.0351	-707334.5349	-637463.6339	-846741.0073	-847814.2873	-827345.3501	-708362.2811	-895190.5054	-983515.5336	-933379.1765	-884773.9958	-749456.4198	-945193.6897	-1141007.337	-1013081.753	-944708.5977
404	-532136.1493	-729504.9016	-789834.7453	-895222.3374	-855997.9912	-554242.8513	-773180.5304	-832025.488	-987228.8763	-928431.7965	-518948.3542	-739821.0373	-795836.3051	-920173.1474	-845467.2892	-531132.5798	-747832.2782	-792495.8532	-824763.7624	-714667.6907	-637600.663	-795477.9859	-855734.193	-938975.5678	-867057.0061	-628184.6705	-844111.5583	-903230.863	-1057654.126	-994391.8312	-592268.6763	-809772.3675	-865395.5968	-988005.0173	-909062.4283	-598190.227	-811400.8138	-854956.0999	-885591.8282	-772293.4912	-743065.1772	-861451.0705	-921633.578	-982728.7303	-878116.021	-702126.4266	-915042.5237	-974436.2376	-1128079.375
405	-532165.2095	-739242.7314	-822239.1131	-816819.8513	-719837.2932	-564387.4902	-819325.8346	-878002.2053	-830852.6486	-693832.2245	-527230.6568	-776195.2825	-828155.922	-789797.2812	-657223.9764	-532432.781	-755834.0329	-799210.3953	-783128.3678	-662292.0077	-645466.9027	-814665.445	-874478.1126	-850733.7813	-735836.285	-638456.4668	-890233.8267	-946787.2611	-898496.1601	-759036.2186	-600659.8745	-845996.115	-896075.6535	-856885.3562	-721842.6763	-599699.4072	-819553.4233	-861514.4591	-844581.0959	-721016.0416	-758768.596	-890088.1598	-926717.047	-884647.65	-751835.2768	-712525.3809	-961141.7589	-1015572.312	-966139.6717
406	-532131.1857	-710506.1489	-858790.2571	-930260.3708	-769427.2806	-553580.1094	-781543.759	-975983.2873	-1015065.147	-743929.4257	-516752.0231	-746921.9104	-908483.8489	-935744.3574	-694431.226	-526948.3368	-744390.932	-820771.584	-824070.5058	-667199.9655	-641609.0698	-798311.7633	-928178.7053	-953431.3832	-773422.4676	-628038.9345	-854288.32	-1047535.128	-1082520.225	-808220.0655	-590660.7742	-818204.6392	-977776.6415	-1001840.722	-758295.4837	-594652.1295	-808786.7333	-883401.503	-885093.6482	-725916.9913	-751086.9538	-886117.3777	-997567.091	-976602.333	-777417.6572	-702497.6985	-927032.8185	-1119086.979	-1149975.323
407	-525392.266	-797917.0524	-927662.3922	-859447.9253	-721484.5487	-556798.4674	-943576.1612	-1040435.285	-870453.1773	-687522.1817	-520752.0155	-875405.3028	-954934.4624	-817969.3588	-649245.0759	-522752.4722	-780501.6015	-831635.2977	-785367.3957	-654371.0639	-651138.3352	-884618.8949	-968243.0841	-883242.1121	-738934.5181	-633326.4747	-1016677.891	-1108883.155	-937693.3255	-753384.5256	-596061.8688	-946217.8913	-1022013.019	-884843.0051	-714620.5399	-591025.4081	-844659.1552	-893832.2311	-847202.506	-713831.1819	-776884.4045	-971320.7428	-1008823.703	-907036.2419	-756384.4879	-709854.4195	-1089779.569	-1177331.004	-1004933.474
408	-531964.5062	-709705.507	-864169.7355	-940063.6728	-773301.2921	-552560.7076	-781632.0838	-987493.1463	-1030266.944	-747649.9177	-515784.9336	-747061.5899	-917765.2354	-947710.8035	-697114.6932	-526289.8311	-744103.6727	-823223.9853	-827290.2313	-667387.5756	-641448.1655	-798741.7153	-934601.7368	-962158.9703	-776403.5342	-627109.2351	-854571.7765	-1059250.737	-1097697.683	-811885.8864	-589776.3117	-818483.3993	-987143.8137	-1013725.299	-760938.9499	-594051.798	-808562.3843	-885876.5035	-888289.4215	-726121.8884	-750931.8248	-887777.9237	-1005033.676	-984254.2054	-779505.7789	-701657.7015	-927511.4067	-1131008.339	-1165128.443
409	-577844.4079	-765770.6976	-804428.4785	-800236.8296	-714810.5003	-643228.4602	-854256.6736	-843307.8601	-814396.0306	-690327.4663	-588112.9801	-801696.2364	-799052.8959	-775610.4682	-653600.0926	-546935.7975	-759626.1467	-787414.3958	-776321.9735	-659262.8736	-689286.9767	-835131.0908	-858139.994	-840132.1988	-732450.4541	-717154.5491	-924453.3895	-912179.2244	-882636.1394	-755748.9199	-661136.1259	-870983.0937	-867348.3963	-843323.6987	-718483.0491	-614165.752	-823439.3456	-850191.3729	-838257.1237	-718270.308	-800729.5492	-904491.4841	-911851.4478	-880027.5056	-750090.408	-791080.5755	-994650.0429	-981050.5888	-950876.2481
410	-643512.9969	-833477.1952	-827368.3084	-795369.085	-708009.9448	-758507.3964	-965603.365	-867719.1498	-808288.9379	-682063.3247	-676841.3027	-886999.5091	-815054.0969	-767527.7165	-644368.1469	-564228.9858	-776993.8298	-784944.7358	-767117.9278	-650954.9652	-758030.2044	-899025.0004	-877793.5839	-839502.6848	-728809.1683	-833379.4707	-1035763.846	-936561.3819	-877237.9866	-748123.568	-750140.471	-955989.3359	-883518.8298	-836082.1769	-710006.9273	-631878.936	-841155.4033	-848384.0947	-829960.9938	-710737.3183	-872547.4212	-964572.8055	-928218.7992	-883636.2222	-749608.3921	-908251.4824	-1105924.265	-1005403.614	-946187.0353
411	-628052.188	-817536.5874	-821967.426	-796515.1316	-709611.0465	-731366.4812	-939388.2453	-861971.8314	-809726.7728	-684009.0086	-655951.3816	-866915.9711	-811286.8238	-769430.6945	-646541.6875	-560157.5312	-772904.8363	-785526.1849	-769284.8998	-652910.9534	-741845.512	-883982.0165	-873166.4036	-839650.8957	-729666.4614	-806015.8356	-1009557.257	-930820.9223	-878508.9109	-749918.8572	-729185.564	-935975.7299	-879711.7131	-837787.0984	-712002.5192	-627708.5989	-836984.3896	-848809.5947	-831914.2089	-712510.8621	-855638.8442	-950427.4455	-924365.3208	-882786.5972	-749721.8764	-880665.1275	-1079726.207	-999670.0132	-947291.049
412	-532819.9485	-726757.0083	-789636.9805	-866050.992	-812545.6748	-558223.8773	-775476.1838	-830464.6817	-933569.6247	-854476.2773	-522226.7157	-741504.1951	-793484.6904	-875918.1716	-786415.5799	-532510.0635	-747919.3992	-791401.1412	-811304.0245	-698805.2926	-639536.6467	-794610.962	-852354.6185	-907683.9981	-825030.6968	-631961.2119	-846181.3999	-900934.1705	-1003150.677	-920130.3821	-595394.3535	-811306.9117	-862606.5104	-943534.9302	-850260.7589	-599533.9246	-811492.2552	-853822.4039	-872292.5993	-756706.9326	-746253.3453	-862464.9159	-915072.1939	-949316.9378	-837515.7188	-705698.4837	-916886.5535	-971403.659	-1072731.728
413	-532887.9075	-726483.9101	-789617.3257	-863151.8109	-808227.1857	-558619.5297	-775704.3363	-830309.5617	-928236.7239	-847126.241	-522552.5341	-741671.475	-793250.9762	-871519.9106	-780546.7522	-532646.9642	-747928.0577	-791292.3437	-809966.3345	-697228.8153	-639729.0536	-794524.7932	-852018.741	-904574.0994	-820853.9308	-632336.5418	-846387.1102	-900705.9147	-997733.8756	-912749.9412	-595704.9975	-811459.4217	-862329.3183	-939115.2905	-844416.7813	-599667.4674	-811501.3431	-853709.732	-870970.8614	-755157.8694	-746570.1999	-862565.6765	-914420.0937	-945996.3218	-833480.6759	-706053.491	-917069.8216	-971102.2675	-1067231.027
414	-526861.1997	-785191.6121	-904797.9154	-850202.637	-721127.2876	-558444.3946	-916628.4251	-1005206.374	-861864.5109	-688890.7203	-522157.1202	-853888.3739	-927438.4006	-811859.3249	-650975.5607	-524851.9629	-775151.6346	-824602.9	-784881.7895	-656088.9789	-649908.3001	-869447.2075	-947907.0916	-876191.6202	-738262.5652	-634439.0808	-989254.3713	-1073727.373	-929192.1417	-754610.2796	-597059.0963	-924481.5301	-994699.3937	-878779.477	-716186.8957	-592906.6477	-839214.1583	-886823.0681	-846633.9677	-715389.4531	-772955.4005	-953702.8075	-991016.1962	-902180.5455	-755397.8431	-710433.7046	-1061880.264	-1142248.355	-996519.7724
415	-526872.2664	-785095.7409	-904625.6586	-850132.9847	-721124.5961	-558456.7947	-916425.4058	-1004940.965	-861799.8055	-688901.0306	-522167.706	-853726.2693	-927231.2503	-811813.293	-650988.5979	-524867.7801	-775111.3289	-824549.9192	-784878.131	-656101.9214	-649899.0332	-869332.9068	-947753.8839	-876138.5031	-738257.5028	-634447.463	-989047.7676	-1073462.516	-929128.0953	-754619.5142	-597066.6093	-924317.7723	-994493.6179	-878733.7955	-716198.6964	-592920.8206	-839173.1367	-886770.2623	-846629.6845	-715401.1928	-772925.8001	-953570.0772	-990882.0377	-902143.9636	-755390.4099	-710438.0688	-1061670.076	-1141984.049	-996456.3851
416	-533117.4154	-725561.6173	-789550.9486	-853360.8472	-793643.0091	-559955.7067	-776474.841	-829785.6984	-910226.7289	-822304.0809	-523652.8714	-742236.4039	-792461.6889	-856666.3322	-760726.8523	-533109.2978	-747957.2987	-790924.9186	-805448.7573	-691904.818	-640378.8401	-794233.7885	-850884.433	-894071.5113	-806748.3739	-633604.0864	-847081.8242	-899935.0613	-979440.5372	-887825.0998	-596754.0884	-811974.4706	-861393.1996	-924189.513	-824680.8039	-600118.4612	-811532.0341	-853329.2225	-866507.1568	-749926.4539	-747640.265	-862905.9599	-912217.8547	-934782.1099	-819853.7388	-707252.4032	-917688.745	-970084.4239	-1048654.345
417	-531856.0471	-709184.5258	-867670.1854	-946442.7238	-775822.1282	-551897.3785	-781689.5572	-994982.6613	-1040158.819	-750070.8579	-515155.6443	-747152.4799	-923804.6738	-955497.4216	-698860.8369	-525861.3387	-743916.7518	-824819.7735	-829385.3206	-667509.6543	-641343.4644	-799021.487	-938781.2311	-967838.049	-778343.3271	-626504.2757	-854756.2229	-1066874.135	-1107573.72	-814271.2519	-589200.7881	-818664.7897	-993239.0732	-1021458.645	-762659.0649	-593661.1597	-808416.3995	-887486.997	-890368.925	-726255.2158	-750830.8817	-888858.4481	-1009892.214	-989233.3118	-780864.5287	-701111.1118	-927822.8262	-1138765.62	-1174988.644
418	-531265.4747	-747037.1751	-836243.8055	-822482.6714	-720056.1187	-563379.3454	-835831.5591	-899580.2223	-836113.2819	-692993.9826	-526370.0179	-789374.59	-844997.5007	-793539.7305	-656164.0393	-531146.8246	-759110.9344	-803517.8005	-783425.8059	-661239.7697	-646220.31	-823958.2364	-886934.0862	-855052.2693	-736247.862	-637774.9858	-907030.9728	-968320.4855	-903703.2097	-758285.4336	-600049.0639	-859309.8266	-912805.4885	-860599.3202	-720883.2696	-598547.1315	-822888.5315	-865807.6328	-844929.3306	-720061.5869	-761175.1453	-900879.2995	-937624.3007	-887621.8066	-752439.6054	-712170.5637	-978230.3277	-1037060.741	-971293.1375
419	-533596.8969	-717546.6652	-811485.3368	-844054.1648	-735360.8164	-562544.3093	-780767.0664	-874770.3211	-881386.7979	-711212.9495	-525256.2103	-745693.6271	-826867.1534	-830516.3528	-670833.9192	-532738.9647	-746916.9728	-799206.1751	-795757.564	-665550.1994	-643023.9957	-794530.9423	-871697.2086	-876684.5711	-747208.1945	-636214.3289	-851795.7198	-944512.8769	-949055.9024	-775984.3447	-598438.3734	-815753.3376	-895405.5819	-897332.6405	-735049.9285	-599931.198	-810759.5657	-861637.3671	-856991.3322	-724115.2103	-752451.0945	-871515.2194	-931909.0179	-909314.9149	-759055.5735	-709884.2863	-922824.3108	-1014255.436	-1016725.013
420	-533538.5231	-723869.3674	-789429.1581	-835396.1016	-766883.5367	-562407.3632	-777888.5855	-828824.4988	-877181.465	-776759.658	-525671.8023	-743272.9519	-791013.4814	-829412.5538	-724360.7224	-533957.6009	-748010.951	-790250.7562	-797159.7749	-682136.1925	-641571.0873	-793699.8445	-848803.1716	-874801.0566	-780867.0871	-635929.8141	-848356.5059	-898520.6769	-945875.3866	-842092.2745	-598678.9908	-812919.4972	-859675.5817	-896803.2614	-788468.6573	-600945.9577	-811588.347	-852631.0524	-858317.0215	-740327.7001	-749603.6516	-863530.3217	-908177.1225	-914205.9471	-794850.6376	-709452.2022	-918824.3637	-968216.8548	-1014569.308
421	-533513.4384	-723970.1721	-789436.4129	-836466.2338	-768477.5572	-562261.3218	-777804.3709	-828881.756	-879149.9205	-779472.6691	-525551.5377	-743211.2064	-791099.7489	-831036.0194	-726526.9967	-533907.0688	-748007.755	-790290.915	-797653.5368	-682718.0945	-641500.067	-793731.6507	-848927.1491	-875948.9679	-782408.7955	-635791.2741	-848280.575	-898604.9296	-947874.8109	-844816.5084	-598564.3274	-812863.2034	-859777.8975	-898434.6183	-790625.7591	-600896.665	-811584.9925	-852672.6414	-858804.8953	-740899.4831	-749486.6957	-863493.1294	-908417.8227	-915431.6374	-796340.0338	-709321.1635	-918756.7167	-968328.1031	-1016599.701
422	-532771.2888	-713580.872	-838131.3281	-892612.5345	-754549.8289	-557494.9404	-781204.563	-931781.7227	-956685.3523	-729641.5385	-520465.9581	-746385.4965	-872840.3363	-889789.3517	-684125.8479	-529477.2105	-745494.1005	-811353.5731	-811705.7232	-666479.4823	-642226.994	-796660.6092	-903512.1965	-919914.6382	-761974.2122	-631609.2797	-853199.7556	-1002543.415	-1024233.9	-794142.1331	-594057.3948	-817134.1107	-941803.6842	-956200.1201	-748143.722	-596957.5959	-809648.3055	-873896.7044	-872820.8498	-725130.1204	-751682.6991	-879740.3465	-968893.0024	-947216.6795	-769398.5974	-705723.5573	-925194.8858	-1073305.115	-1091782.461
423	-525379.4008	-798028.5042	-927862.6436	-859528.8973	-721487.6777	-556784.0521	-943812.1746	-1040743.827	-870528.3985	-687510.1957	-520739.7093	-875593.7521	-955175.2781	-818022.8716	-649229.92	-522734.0844	-780548.4575	-831696.8888	-785371.6488	-654356.0181	-651149.1081	-884751.7714	-968421.1906	-883303.8617	-738940.4032	-633316.7303	-1016918.071	-1109191.056	-937767.7805	-753373.7902	-596053.1349	-946408.2625	-1022252.237	-884896.1106	-714606.8215	-591008.9318	-844706.8435	-893893.6186	-847207.4854	-713817.5343	-776918.8154	-971475.044	-1008979.664	-907078.769	-756393.1291	-709849.346	-1090023.917	-1177638.264	-1005007.163
424	-532394.1459	-711769.2734	-850303.3795	-914794.2942	-763315.4869	-555188.3579	-781404.4142	-957824.879	-991082.1917	-738059.8305	-518277.7417	-746701.5467	-893841.1669	-916865.6194	-690197.6821	-527987.2213	-744844.1238	-816902.5787	-818990.9396	-666903.9844	-641862.9187	-797633.4541	-918045.4771	-939662.3968	-768719.4193	-629505.6651	-853841.1277	-1029052.12	-1058575.668	-802436.7217	-592056.1371	-817764.8563	-962998.6206	-983091.1442	-754125.0468	-595599.2363	-809140.675	-879496.8445	-880051.87	-725593.7375	-751331.6915	-883497.6348	-985787.5123	-964530.4369	-774123.3538	-703822.9109	-926277.7789	-1100279.369	-1126069.161
425	-527550.0718	-779223.8812	-894075.3753	-845866.9605	-720959.7462	-559216.2696	-903990.997	-988685.4	-857836.7643	-689532.511	-522816.059	-843797.7807	-914543.8294	-808993.9593	-651787.09	-525836.5415	-772642.7106	-821304.9821	-784654.0593	-656894.6135	-649331.462	-862332.283	-938370.3111	-872885.2169	-737947.4457	-634960.8493	-976393.8195	-1057240.695	-925205.4209	-755185.11	-597526.7568	-914288.0318	-981890.3779	-875935.9209	-716921.455	-593788.8751	-836660.669	-883536.0464	-846367.3456	-716120.221	-771112.8522	-945440.689	-982665.1762	-899903.4149	-754935.1455	-710705.3665	-1048796.588	-1125795.973	-992574.0774
426	-528849.3936	-767967.7974	-873850.9698	-837689.1893	-720643.7367	-560672.148	-880154.8101	-957524.2323	-850239.7975	-690743.0299	-524058.9218	-824765.327	-890222.6298	-803589.427	-653317.7626	-527693.6122	-767910.4834	-815084.5877	-784224.5241	-658414.1676	-648243.4542	-848912.4108	-920382.4358	-866648.8176	-737353.0806	-635944.9872	-952136.7858	-1026144.213	-917685.8353	-756269.3309	-598408.8384	-895061.4827	-957730.5492	-870572.5245	-718306.9499	-595452.8954	-831844.3845	-877336.2039	-845864.4542	-717498.5647	-767637.5149	-929857.0274	-966913.8326	-895608.3867	-754062.4247	-711217.7638	-1024118.706	-1094764.18	-985131.8731
427	-610927.2624	-799880.2201	-815985.2222	-797784.5325	-711384.482	-701304.2669	-910351.474	-855605.9033	-811319.3685	-686164.1152	-632812.9841	-844670.7514	-807114.0621	-771538.4986	-648949.1762	-555647.8475	-768375.7261	-786170.218	-771685.1127	-655077.4734	-723918.7883	-867319.8884	-868041.1791	-839815.0591	-730616.0287	-775706.929	-980529.9354	-924462.5913	-879916.6306	-751907.3815	-705975.1859	-913807.9691	-875494.8193	-839675.5282	-714212.9055	-623089.3896	-832364.4309	-849280.8932	-834077.6573	-714475.3003	-836910.3207	-934759.5566	-920097.0751	-881845.5231	-749847.5756	-850109.5288	-1050708.334	-993319.2792	-948513.8927
428	-532586.5894	-727694.7775	-789704.4714	-876006.2508	-827374.5779	-556865.2788	-774692.7498	-830997.3356	-951881.8324	-879714.9601	-521107.9144	-740929.7865	-794287.2222	-891020.997	-806568.0632	-532039.9719	-747889.6676	-791774.7318	-815897.4079	-704218.6281	-638875.9566	-794906.8499	-853507.9606	-918362.8225	-839372.9487	-630672.3976	-845475.0283	-901717.9591	-1021750.982	-945473.4691	-594327.6586	-810783.2202	-863558.3375	-958711.1664	-870327.9114	-599075.3631	-811461.0491	-854209.2985	-876831.2061	-762026.1328	-745165.3242	-862118.9225	-917311.387	-960719.3273	-851371.3195	-704479.4534	-916257.2443	-972438.5823	-1091620.132
429	-584178.7536	-772301.6185	-806641.2383	-799767.2903	-714154.5235	-654348.185	-864997.0969	-845662.5559	-813806.9448	-689530.313	-596671.6514	-809924.5299	-800596.3605	-774830.8116	-652709.5856	-548603.8862	-761301.4211	-787176.1742	-775434.1577	-658461.4986	-695917.8999	-841294.2522	-860035.7654	-840071.4763	-732099.2182	-728365.523	-935190.3175	-914531.1101	-882115.4374	-755013.3839	-669721.4222	-879182.7358	-868908.1849	-842625.1866	-717665.4484	-615874.3532	-825148.224	-850017.0442	-837456.8849	-717543.6811	-807657.0504	-910286.8859	-913430.231	-880375.5998	-750043.9131	-802382.7985	-1005383.476	-983399.6644	-950423.93
430	-524506.988	-805586.2567	-941442.0601	-865019.7564	-721699.8583	-555806.5213	-959816.6753	-1061666.591	-875629.2839	-686697.4085	-519905.2051	-888372.848	-971505.4342	-821651.6753	-648202.1696	-521487.1782	-783725.8505	-835873.4925	-785660.0546	-653335.733	-651879.6369	-893762.3718	-980498.9178	-887491.2117	-739339.4821	-632655.9436	-1033205.144	-1130070.388	-942816.7093	-752645.804	-595460.8726	-959317.6812	-1038474.043	-888497.294	-713676.5488	-589891.6469	-847940.6757	-898056.423	-847545.1453	-712892.0631	-779252.2859	-981938.4928	-1019555.701	-909962.6104	-756979.1062	-709505.3034	-1106593.563	-1198474.162	-1010004.135
431	-527474.4322	-779879.1508	-895252.7332	-846343.0271	-720978.1426	-559131.5161	-905378.6137	-990499.4383	-858279.0195	-689462.041	-522743.7061	-844905.7495	-915959.681	-809308.5826	-651697.9824	-525728.4326	-772918.1959	-821667.1006	-784679.0645	-656806.1531	-649394.8001	-863113.517	-939417.4701	-873248.2671	-737982.0465	-634903.558	-977805.9357	-1059050.967	-925643.1714	-755121.9923	-597475.4067	-915407.2998	-983296.8353	-876248.1494	-716840.7988	-593692.0047	-836941.0476	-883896.9684	-846396.6213	-716039.9811	-771315.1679	-946347.8873	-983582.1362	-900153.4487	-754985.9507	-710675.5374	-1050233.203	-1127602.48	-993007.3232
432	-532064.4596	-740115.5321	-823807.3206	-817453.9585	-719861.7967	-564274.6008	-821174.1009	-880418.4531	-831441.72	-693738.3604	-527134.2848	-777671.0656	-830041.7963	-790216.3505	-657105.2875	-532288.7831	-756200.9714	-799692.7268	-783161.6742	-662174.181	-645551.2672	-815706.0265	-875872.8987	-851217.3539	-735882.3722	-638380.1564	-892114.7256	-949198.4931	-899079.2314	-758952.1478	-600591.4776	-847486.9483	-897949.015	-857301.2358	-721735.2445	-599570.3785	-819926.8796	-861995.197	-844620.0903	-720909.1644	-759038.0748	-891296.5223	-927938.4116	-884980.688	-751902.9479	-712485.6494	-963055.2905	-1017978.528	-966716.7428
433	-532452.7965	-712051	-848410.4706	-911344.7483	-761952.3155	-555547.0608	-781373.3348	-953774.8368	-985733.0455	-736750.679	-518618.0372	-746652.3968	-890575.2705	-912654.9152	-689253.4346	-528218.9336	-744945.2034	-816039.6377	-817857.9958	-666837.9689	-641919.537	-797482.1643	-915785.3671	-936591.3691	-767670.4537	-629832.8039	-853741.3862	-1024929.679	-1053235.086	-801146.8077	-592367.3581	-817666.7673	-959702.5383	-978909.2478	-753194.8747	-595810.4785	-809219.618	-878625.9515	-878927.3543	-725521.6391	-751386.2776	-882913.3287	-983160.2011	-961837.9273	-773388.5941	-704118.4856	-926109.3752	-1096084.529	-1120737.143
434	-532994.9788	-726053.6372	-789586.3591	-858584.0783	-801423.2978	-559242.8902	-776063.7962	-830065.1662	-919834.605	-835546.0745	-523065.8693	-741935.0286	-792882.7537	-864590.34	-771300.2668	-532862.6545	-747941.6994	-791120.9306	-807858.7703	-694745.0356	-640032.1954	-794389.0321	-851489.5576	-899674.376	-814273.3312	-632927.8835	-846711.2119	-900346.2921	-989199.5698	-901121.8713	-596194.425	-811699.7051	-861892.5952	-932152.0372	-835209.4478	-599877.8675	-811515.6612	-853532.2147	-868888.4301	-752717.2815	-747069.4124	-862724.4273	-913392.6934	-940764.6079	-827123.3645	-706612.8139	-917358.565	-970627.4177	-1058564.535
435	-668543.8263	-859284.8122	-836112.26	-793513.6517	-705417.784	-802448.1515	-1008045.27	-877023.9763	-805961.1035	-678913.2903	-710661.7874	-919514.4709	-821153.2585	-764446.8223	-640849.2155	-570820.6129	-783613.8519	-784003.3779	-763609.631	-647788.2482	-784232.9907	-923379.377	-885284.9228	-839262.7336	-727421.2231	-877680.806	-1078191.94	-945855.1041	-875180.3782	-745217.0204	-784066.1669	-988391.0789	-889682.4975	-833321.9335	-706776.0926	-638630.6524	-847908.2151	-847695.2163	-826798.7664	-707865.9763	-899922.1666	-987473.9418	-934457.526	-885011.7531	-749424.6626	-952913.3981	-1148338.547	-1014686.232	-944399.6528
436	-533416.7694	-716681.4262	-817298.8397	-854648.4122	-739547.3891	-561442.6606	-780862.5174	-887208.8131	-897815.0989	-715233.6164	-524211.0946	-745844.576	-836897.3763	-843448.27	-673733.8926	-532027.3298	-746606.5369	-801856.4399	-799237.0619	-665752.9462	-642850.1094	-794995.5835	-878638.46	-886116.3133	-750429.7781	-635209.6199	-852102.0461	-957173.7196	-965457.9008	-779945.9296	-597482.5511	-816054.5885	-905528.5118	-910176.0833	-737906.6736	-599282.4308	-810517.1159	-864312.0543	-860444.9454	-724336.6388	-752283.4495	-873309.7408	-939978.0178	-917584.152	-761312.1681	-708976.5171	-923341.5122	-1027138.63	-1033100.711
437	-642454.7292	-832386.0861	-826998.6266	-795447.53	-708119.5376	-756649.6441	-963808.9819	-867325.755	-808387.3554	-682196.5037	-675411.4209	-885624.8229	-814796.2331	-767657.9723	-644516.9222	-563950.3013	-776713.9447	-784984.535	-767266.2536	-651088.8495	-756922.388	-897995.3321	-877476.8608	-839512.8296	-728867.8487	-831506.4735	-1033970.047	-936168.4566	-877324.9793	-748246.4527	-748706.1411	-954619.4365	-883258.2387	-836198.8761	-710143.5224	-631593.4831	-840869.9041	-848413.2195	-830094.6883	-710858.7146	-871390.0561	-963604.5782	-927955.0348	-883578.0667	-749616.1599	-906363.2404	-1104131.05	-1005011.158	-946262.6033
438	-525450.9661	-797408.5306	-926748.7039	-859078.474	-721470.2722	-556864.2404	-942499.3016	-1039027.501	-870109.9652	-687576.8699	-520808.1649	-874545.4639	-953835.6911	-817725.1955	-649314.2279	-522836.37	-780287.8112	-831354.2758	-785347.9904	-654439.7136	-651089.1818	-884012.6185	-967430.4366	-882960.3671	-738907.6662	-633370.9356	-1015582.019	-1107478.294	-937353.6093	-753433.508	-596101.7191	-945349.2837	-1020921.538	-884600.7002	-714683.1331	-591100.5844	-844441.5674	-893552.1376	-847179.7866	-713893.452	-776727.3974	-970616.7117	-1008112.096	-906842.2032	-756345.0605	-709877.5683	-1088664.684	-1175929.064	-1004597.253
439	-532957.3106	-726205.0091	-789597.2533	-860191.027	-803816.9359	-559023.5892	-775937.3366	-830151.1456	-922790.5079	-839620.0287	-522885.2757	-741842.3093	-793012.296	-867028.1938	-774553.2216	-532786.7737	-747936.9002	-791181.2345	-808600.2207	-695618.8404	-639925.5488	-794436.7935	-851675.7267	-901398.1205	-816588.4155	-632719.8468	-846597.1914	-900472.8089	-992201.9766	-905212.6781	-596022.2422	-811615.1723	-862046.2364	-934601.7407	-838448.6288	-599803.8478	-811510.624	-853594.6661	-869621.0387	-753575.8912	-746893.7872	-862668.5781	-913754.1374	-942605.1481	-829359.895	-706416.0416	-917256.9838	-970794.472	-1061613.445
440	-533547.6552	-717310.1336	-813074.5827	-846950.3298	-736505.306	-562243.15	-780793.16	-878170.6499	-885877.8267	-712312.0851	-524970.5055	-745734.8922	-829609.1302	-834051.5701	-671626.6892	-532544.424	-746832.1085	-799930.6819	-796708.7595	-665605.6246	-642976.4602	-794657.962	-873594.7487	-879262.9403	-748088.8836	-635939.6701	-851879.4607	-947973.9901	-953539.7408	-777067.329	-598177.0788	-815835.691	-898172.9021	-900843.6714	-735830.8811	-599753.8435	-810693.2869	-862368.5502	-857935.4515	-724175.7426	-752405.2651	-872005.7904	-934114.8523	-911575.4884	-759672.4621	-709636.1281	-922965.6989	-1017777.334	-1021201.662
441	-600076.0744	-788692.2846	-812194.6062	-798588.8868	-712508.2172	-682255.3817	-891952.3596	-851572.1408	-812328.5148	-687529.6958	-618151.3669	-830575.0952	-804469.9967	-772874.106	-650474.6784	-552790.292	-765505.8609	-786578.3087	-773206.0047	-656450.2862	-712559.5418	-856761.9513	-864793.5868	-839919.081	-731217.7209	-756501.7276	-962136.8084	-920433.6426	-880808.6304	-753167.4075	-691267.9583	-899761.3948	-872822.7896	-840872.1294	-715613.5142	-620162.4333	-829436.9998	-849579.5308	-835448.5238	-715720.0642	-825043.0148	-924831.6181	-917392.5064	-881249.2127	-749927.2247	-830748.0111	-1032321.195	-989295.1444	-949288.7461
442	-565764.8069	-753316.2276	-800208.7443	-801132.2411	-716061.4484	-622023.1386	-833774.6804	-838817.4539	-815519.4177	-691847.638	-571791.5889	-786004.8761	-796109.5081	-777097.2736	-655298.2899	-543754.7513	-756431.3974	-787868.6847	-778015.0386	-660791.0962	-676641.8023	-823377.9385	-854524.7568	-840247.9966	-733120.2611	-695775.2155	-903978.0615	-907694.1771	-883629.1184	-757151.5876	-644763.9609	-855346.3715	-864373.8786	-844655.7616	-720042.2142	-610907.4485	-820180.5135	-850523.818	-839783.1796	-719655.9859	-787518.8004	-893439.6494	-908840.7074	-879363.6896	-750179.0738	-769527.2299	-974181.3802	-976570.9002	-951738.8191
443	-533315.3066	-724766.378	-789493.7156	-844918.6708	-781067.9249	-561107.8141	-777139.2022	-829334.0017	-894697.7615	-800901.3812	-524601.628	-742723.5091	-791781.1325	-843858.9587	-743637.3097	-533507.941	-747982.5116	-790608.1093	-801553.5141	-687314.2459	-640939.113	-793982.8721	-849906.3854	-885015.7427	-794585.9757	-634697.016	-847680.8356	-899270.3993	-963667.2593	-866333.8642	-597658.6582	-812418.5671	-860586.0391	-911319.8864	-807663.6227	-600507.3268	-811558.4972	-853001.1313	-862658.3649	-745415.7096	-748562.9197	-863199.3664	-910318.9926	-925112.7497	-808104.0265	-708286.1551	-918222.4065	-969206.7968	-1032636.757
444	-630742.1246	-820310.0015	-822907.0942	-796315.7376	-709332.4801	-736088.572	-943949.2623	-862971.7741	-809476.6123	-683670.4903	-659585.8981	-870410.1896	-811942.2699	-769099.6064	-646163.5258	-560865.9	-773616.2567	-785425.0219	-768907.8808	-652570.6423	-744661.393	-886599.2582	-873971.4599	-839625.1093	-729517.3059	-810776.6761	-1014116.79	-931819.6717	-878287.7902	-749606.5052	-732831.387	-939457.7813	-880374.0913	-837490.469	-711655.3177	-628434.1717	-837710.0802	-848735.5644	-831574.3803	-712202.2934	-858580.6696	-952888.5148	-925035.7652	-882934.4185	-749702.1319	-885464.7178	-1084284.256	-1000667.569	-947098.9681
445	-529079.3079	-765976.0388	-870272.2711	-836242.1367	-720587.8189	-560929.765	-875937.0083	-952010.2788	-848895.5179	-690957.2306	-524278.8457	-821397.5435	-885919.0054	-802633.0976	-653588.6143	-528022.22	-767073.1181	-813983.8919	-784148.5181	-658683.052	-648050.9318	-846537.7709	-917199.4899	-865545.2898	-737247.9079	-636119.1299	-947844.5154	-1020641.705	-916355.2483	-756461.1833	-598564.9223	-891659.3542	-953455.4793	-869623.4741	-718552.1126	-595747.343	-830992.1453	-876239.1447	-845775.4679	-717742.462	-767022.5556	-927099.5061	-964126.64	-894848.3835	-753907.9972	-711308.4323	-1019751.966	-1089273.119	-983814.9787
446	-532255.6516	-738459.2274	-820831.3497	-816250.6199	-719815.2966	-564488.8297	-817666.6653	-875833.1649	-830323.8453	-693916.4852	-527317.169	-774870.4875	-826462.9924	-789421.087	-657330.5222	-532562.0465	-755504.636	-798777.4113	-783098.4691	-662397.7796	-645391.1696	-813731.3257	-873226.0277	-850299.6832	-735794.9129	-638524.9698	-888545.3635	-944622.7233	-897972.7431	-759111.6882	-600721.2737	-844657.8095	-894393.9564	-856512.0254	-721939.1167	-599815.2349	-819218.1754	-861082.9056	-844546.0911	-721111.9842	-758526.6876	-889003.4253	-925620.6407	-884348.6853	-751774.5292	-712561.0474	-959424.0016	-1013412.277	-965621.6409
447	-622195.0842	-811497.7188	-819921.3798	-796949.2948	-710217.6007	-721084.5382	-929457.0266	-859794.5431	-810271.4758	-684746.1027	-648037.5373	-859307.6134	-809859.6469	-770151.6102	-647365.102	-558615.1195	-771355.7804	-785746.4584	-770105.8257	-653651.9512	-735714.1756	-878283.1997	-871413.4633	-839707.0432	-729991.2344	-795649.5184	-999629.2706	-928646.2323	-878990.3822	-750598.9766	-721247.1008	-928393.8648	-878269.442	-838432.9832	-712758.5203	-626128.727	-835404.2615	-848970.7892	-832654.1562	-713182.7434	-849233.2744	-945068.6806	-922905.4862	-882464.729	-749764.8683	-870214.4361	-1069801.452	-997497.9215	-947709.2886
448	-533135.676	-715331.1994	-826370.955	-871180.9976	-746080.6395	-559723.5106	-781011.4712	-906619.3879	-923451.8695	-721507.9668	-522580.1656	-746080.1356	-852549.7876	-863628.847	-678259.373	-530916.8059	-746122.094	-805992.2438	-804666.9045	-666069.3375	-642578.7556	-795720.6676	-889470.4548	-900834.7807	-755457.139	-633641.7466	-852580.0757	-976931.2782	-991053.6254	-786128.0809	-595990.9668	-816524.698	-921325.5947	-930218.5938	-742364.6952	-598270.0136	-810138.7671	-868485.97	-865834.3943	-724682.1835	-752021.8352	-876110.1358	-952569.892	-930488.5012	-764833.6398	-707559.9208	-924148.6178	-1047243.174	-1058655.392
449	-643094.7192	-833045.937	-827222.1925	-795400.0902	-708053.2611	-757773.1243	-964894.1394	-867563.6615	-808327.8372	-682115.9634	-676276.1454	-886456.1677	-814952.1769	-767579.1998	-644426.95	-564118.8364	-776883.2059	-784960.4663	-767176.5532	-651007.8826	-757592.3426	-898618.0265	-877668.3998	-839506.6945	-728832.3616	-832639.1731	-1035054.851	-936406.0791	-877272.3702	-748172.1379	-749573.5556	-955447.8865	-883415.8318	-836128.302	-710060.9162	-631766.1115	-841042.5605	-848395.6062	-830013.8362	-710785.2999	-872089.9755	-964190.116	-928114.547	-883613.2364	-749611.4623	-907505.1594	-1105215.501	-1005248.497	-946216.9033
450	-533496.9091	-717066.3758	-814712.3806	-849934.9738	-737684.7601	-561932.7901	-780820.0507	-881674.8603	-890506.0584	-713444.7998	-524676.0722	-745777.418	-832434.8756	-837694.7897	-672443.6787	-532343.94	-746744.6515	-800677.3227	-797689.0143	-665662.743	-642927.4724	-794788.8621	-875550.2595	-881920.0799	-748996.478	-635656.6204	-851965.7598	-951540.8418	-958160.5624	-778183.3989	-597907.8016	-815920.5604	-901024.7652	-904461.9657	-736635.6922	-599571.0709	-810624.9832	-863122.0714	-858908.4141	-724238.1241	-752358.0356	-872511.3485	-936388.0758	-913905.1234	-760308.1968	-709380.3886	-923111.4065	-1021406.827	-1025815.074
451	-531909.4639	-730415.8522	-789900.3061	-904892.8919	-870402.8118	-552923.1066	-772419.5013	-832542.9088	-1005017.385	-952948.694	-517861.5489	-739263.0558	-796615.8858	-934844.0567	-865043.4442	-530675.932	-747803.3967	-792858.7597	-829225.7825	-719926.2136	-636958.8675	-795765.4118	-856854.5513	-949348.9952	-880989.093	-626932.7142	-843425.3878	-903992.2365	-1075722.493	-1019010.147	-591232.4872	-809263.6527	-866320.2031	-1002747.238	-928555.6929	-597744.7796	-811370.5001	-855331.9299	-890000.6382	-777460.5709	-742008.2717	-861114.9719	-923808.7338	-993805.0299	-891575.3741	-700942.2586	-914431.2117	-975441.5638	-1146427.601
452	-577032.9799	-764934.0884	-804145.0246	-800296.9774	-714894.5307	-641804.0265	-852880.8283	-843006.2242	-814471.4924	-690429.5814	-587016.6166	-800642.1943	-798855.1785	-775710.3419	-653714.1663	-546722.1158	-759411.5445	-787444.9119	-776435.7024	-659365.5295	-688437.5572	-834341.5915	-857897.1461	-840139.9773	-732495.4473	-715718.4264	-923077.9919	-911877.9485	-882702.8412	-755843.1419	-660036.3518	-869932.7218	-867148.5878	-843413.1779	-718587.7836	-613946.8806	-823220.4387	-850213.7044	-838359.6341	-718363.3887	-799842.1382	-903749.0947	-911649.2061	-879982.9148	-750096.364	-789632.7638	-993275.093	-980749.6728	-950934.19
453	-574506.0008	-762328.689	-803262.2818	-800484.292	-715156.2215	-637368.0021	-848596.1198	-842066.8585	-814706.4981	-690747.5921	-583602.2807	-797359.6571	-798239.4397	-776021.3726	-654069.4189	-546056.6602	-758743.2223	-787539.9464	-776789.8814	-659685.2244	-685792.2636	-831882.9035	-857140.8605	-840164.2015	-732635.5669	-711245.9998	-918794.6778	-910939.7039	-882910.5663	-756136.5715	-656611.3944	-866661.6145	-866526.3368	-843691.8374	-718913.9514	-613265.2633	-822538.7108	-850283.2499	-838678.8757	-718653.2641	-797078.5298	-901437.118	-911019.3775	-879844.0485	-750114.9123	-785123.9349	-988993.1732	-979812.5492	-951114.6346
454	-644119.5626	-834102.5847	-827580.1983	-795324.1227	-707947.1296	-759572.2016	-966631.8489	-867944.6313	-808232.5281	-681986.9907	-677660.8659	-887787.4359	-815201.8964	-767453.058	-644282.8735	-564388.7191	-777154.2511	-784921.9241	-767032.9121	-650878.2269	-758665.1698	-899615.1738	-877975.1196	-839496.8702	-728775.5346	-834453.0137	-1036791.995	-936786.5943	-877188.1251	-748053.1344	-750962.5838	-956774.5191	-883668.1924	-836015.2887	-709928.6353	-632042.5487	-841319.0425	-848367.4013	-829884.3644	-710667.7378	-873210.7865	-965127.7629	-928369.9807	-883669.5551	-749603.9398	-909333.7633	-1106952.079	-1005628.557	-946143.7221
455	-650510.58	-840691.936	-829812.7551	-794850.3827	-707285.284	-770791.4115	-977468.3637	-870320.3939	-807638.1718	-681182.7055	-686296.1094	-896089.3456	-816759.1699	-766666.4261	-643384.3994	-566071.7317	-778844.5138	-784681.5711	-766137.1533	-650069.6823	-765355.4181	-905833.4753	-879887.8519	-839435.6044	-728421.1563	-845764.2891	-1047624.984	-939159.5216	-876662.7645	-747311.0177	-759624.6904	-965047.5211	-885241.936	-835310.5272	-709103.7198	-633766.4363	-843043.2098	-848191.5128	-829076.966	-709934.61	-880200.2661	-970975.0146	-929962.8888	-884020.7637	-749557.0289	-920737.1041	-1117781.541	-1007998.649	-945687.3572
456	-529765.1952	-760034.1657	-859596.191	-831925.2464	-720421.0035	-561698.2956	-863354.3374	-935560.8895	-844885.2232	-691596.2405	-524934.9294	-811350.6722	-873080.3055	-799780.1475	-654396.6273	-529002.5325	-764575.0651	-810700.2637	-783921.7746	-659485.1958	-647476.5931	-839453.6749	-907704.0317	-862253.2129	-736934.1539	-636638.6376	-935039.6875	-1004226.462	-912385.8017	-757033.523	-599030.5564	-881510.0237	-940701.964	-866792.239	-719283.489	-596625.7477	-828449.7201	-872966.3655	-845510.001	-718470.0635	-765187.9909	-918873.1868	-955811.8044	-892581.1196	-753447.3044	-711578.9171	-1006724.981	-1072892.024	-979886.3802
457	-577450.237	-765364.2943	-804290.7839	-800266.0478	-714851.3201	-642536.5068	-853588.3233	-843161.3331	-814432.688	-690377.0712	-587580.3948	-801184.2098	-798956.8499	-775658.9843	-653655.5067	-546831.9964	-759521.8984	-787429.2198	-776377.2201	-659312.7412	-688874.3505	-834747.5723	-858022.0247	-840135.9774	-732472.3106	-716456.9175	-923785.2566	-912032.8723	-882668.5414	-755794.6906	-660601.8838	-870472.85	-867251.3345	-843367.1654	-718533.9264	-614059.4299	-823333.0062	-850202.221	-838306.9206	-718315.5242	-800298.4677	-904130.8503	-911753.204	-880005.8445	-750093.3013	-790377.2657	-993982.1275	-980904.4115	-950904.3948
458	-533321.2222	-724742.6058	-789492.0047	-844666.3079	-780692.0167	-561142.2542	-777159.062	-829320.4991	-894233.5526	-800261.5882	-524629.9892	-742738.0702	-791760.7885	-843476.1067	-743126.4503	-533519.8577	-747983.2652	-790598.6389	-801437.0732	-687177.0194	-640955.8613	-793975.3714	-849877.1486	-884745.0377	-794222.404	-634729.6871	-847698.7419	-899250.5305	-963195.7472	-865691.4246	-597685.6985	-812431.8425	-860561.9105	-910935.1734	-807154.9264	-600518.9512	-811559.2883	-852991.3236	-862543.3126	-745280.8695	-748590.5007	-863208.1372	-910262.2298	-924823.7025	-807752.7912	-708317.0572	-918238.3593	-969180.5618	-1032157.942
459	-620348.8785	-809594.2193	-819276.4498	-797086.1466	-710408.7914	-717843.5879	-926326.6273	-859108.2444	-810443.1705	-684978.4407	-645543.0305	-856909.3984	-809409.7894	-770378.8485	-647624.6488	-558128.9391	-770867.5056	-785815.8904	-770364.5881	-653885.5196	-733781.5295	-876486.8873	-870860.9226	-839724.7413	-730093.6055	-792381.9727	-996499.89	-927960.7527	-879142.1458	-750813.3556	-718744.8339	-926004.0006	-877814.8267	-838636.5712	-712996.8178	-625630.7388	-834906.1925	-849021.599	-832887.3934	-713394.5258	-847214.1878	-943379.5552	-922445.3348	-882363.2736	-749778.4197	-866920.295	-1066673.09	-996813.261	-947841.1211
460	-533338.5756	-724672.87	-789486.9858	-843926.0004	-779589.288	-561243.2843	-777217.3209	-829280.8891	-892871.7933	-798384.7522	-524713.1872	-742780.7852	-791701.1095	-842353.0082	-741627.8418	-533554.8154	-747985.4762	-790570.8574	-801095.4933	-686774.465	-641004.9925	-793953.3682	-849791.382	-883950.9233	-793155.8643	-634825.5278	-847751.2702	-899192.2453	-961812.5639	-863806.8247	-597765.0217	-812470.7861	-860491.1294	-909806.6158	-805662.6634	-600553.0514	-811561.6089	-852962.5528	-862205.8061	-744885.3153	-748671.4097	-863233.8665	-910095.7156	-923975.7813	-806722.4407	-708407.7085	-918285.1569	-969103.6013	-1030753.335
461	-525846.8176	-793979.2508	-920587.1342	-856587.0333	-721373.9967	-557307.7885	-935237.3662	-1029533.936	-867795.4725	-687945.6667	-521186.8156	-868747.0344	-946425.9917	-816078.65	-649780.5628	-523402.1454	-778846.0903	-829459.1697	-785217.1282	-654902.6611	-650757.7092	-879924.1186	-961950.2485	-881060.385	-738726.5868	-633670.7632	-1008191.868	-1098004.436	-935062.6915	-753763.8269	-596370.4542	-939491.7211	-1013561.002	-882966.6873	-715105.2381	-591607.545	-842974.2377	-891663.2929	-847026.5757	-714313.3784	-775668.6007	-965868.9916	-1003313.29	-905533.6794	-756079.1773	-710033.6753	-1081146.318	-1166474.915	-1002329.911
462	-634140.9325	-823814.2854	-824094.3906	-796063.7978	-708980.5038	-742055.0617	-949712.2309	-864235.2288	-809160.5276	-683242.7633	-664178.2082	-874825.2295	-812770.4437	-768681.2675	-645685.7081	-561760.9433	-774515.1555	-785297.1998	-768431.5072	-652140.6501	-748219.3349	-889906.214	-874988.6704	-839592.5276	-729328.8439	-816792.1272	-1019877.883	-933081.6185	-878008.3981	-749211.84	-737437.9832	-943857.4478	-881211.0241	-837115.6696	-711216.6192	-629350.9527	-838627.0098	-848642.0251	-831144.9977	-711812.4086	-862297.7459	-955998.1427	-925882.8899	-883121.1948	-749677.1842	-891529.1302	-1090043.473	-1001928.008	-946856.2686
463	-531232.3715	-747323.9501	-836759.0694	-822691.0192	-720064.1698	-563342.2535	-836438.8416	-900374.1258	-836306.8324	-692963.1418	-526338.3531	-789859.4862	-845617.1401	-793677.4236	-656125.0418	-531099.5114	-759231.499	-803676.2796	-783436.7493	-661201.0555	-646248.0296	-824300.1389	-887392.3693	-855211.1562	-736263.0049	-637749.9126	-907648.9774	-969112.741	-903894.7887	-758257.8105	-600026.5909	-859799.6679	-913421.0165	-860735.9653	-720847.9709	-598504.7367	-823011.2376	-865965.5883	-844942.1429	-720026.4703	-761263.6876	-901276.3296	-938025.6029	-887731.2325	-752461.84	-712157.5092	-978859.0543	-1037851.349	-971482.745
464	-525794.0571	-794436.3175	-921408.3703	-856919.1014	-721386.8287	-557248.6708	-936205.263	-1030799.273	-868103.9564	-687896.5121	-521136.3477	-869519.8698	-947413.583	-816298.1075	-649718.408	-523326.7368	-779038.2481	-829711.7563	-785234.5699	-654840.9578	-650801.889	-880469.0486	-962680.6676	-881313.6214	-738750.7217	-633630.8011	-1009176.854	-1099267.146	-935368.0333	-753719.8008	-596334.6362	-940272.438	-1014542.041	-883184.4744	-715048.9785	-591539.9755	-843169.8086	-891915.0449	-847046.9962	-714257.4091	-775809.7209	-966501.7848	-1003952.892	-905708.0842	-756114.6152	-710012.8688	-1082148.392	-1167734.998	-1002632.11
465	-532655.7368	-713025.8201	-841860.6971	-899408.7568	-757235.5203	-556788.2315	-781265.795	-939761.0301	-967224.127	-732220.8012	-519795.5151	-746482.3304	-879274.7363	-898085.192	-685986.1843	-529020.6959	-745294.9555	-813053.7212	-813937.8252	-666609.5446	-642115.4457	-796958.6771	-907965.0175	-925965.1121	-764040.8619	-630964.7576	-853396.2643	-1010665.361	-1034755.801	-796683.4946	-593444.2337	-817327.3635	-948297.5558	-964439.204	-749976.3274	-596541.4109	-809492.7737	-875612.5195	-875036.3467	-725272.167	-751575.1546	-880891.5341	-974069.2755	-952521.4049	-770846.2055	-705141.2223	-925526.6711	-1081569.7	-1102287.49
466	-533731.9916	-718195.5902	-807125.2382	-836108.5313	-732220.9074	-563370.5404	-780695.4786	-865441.5132	-869065.6528	-708197.469	-526040.042	-745580.4161	-819344.5355	-820817.4785	-668658.9534	-533272.6873	-747149.7982	-797218.4895	-793147.9577	-665398.1403	-643154.4096	-794182.4637	-866491.3041	-869610.8108	-744792.0227	-636967.8557	-851565.9766	-935017.3071	-936754.4842	-773013.1755	-599155.2353	-815527.401	-887813.4341	-887700.1215	-732907.3836	-600417.7702	-810941.4019	-859631.3647	-854401.1393	-723949.14	-752576.8275	-870169.3372	-925857.3076	-903113.0277	-757363.1386	-710565.1088	-922436.4122	-1004593.104	-1004443.321
467	-529685.5385	-760724.235	-860836.0752	-832426.5956	-720440.3769	-561609.041	-864815.6467	-937471.2665	-845350.9654	-691522.028	-524858.7341	-812517.4822	-874571.3491	-800111.4796	-654302.7874	-528888.6823	-764865.1806	-811081.6133	-783948.1078	-659392.0375	-647543.2948	-840276.3981	-908806.8025	-862635.5436	-736970.5922	-636578.3037	-936526.7974	-1006132.874	-912846.7999	-756967.0534	-598976.4792	-882688.7329	-942183.1146	-867121.0491	-719198.5494	-596523.7327	-828744.9888	-873346.4551	-845540.8315	-718385.5623	-765401.0511	-919828.564	-956777.4616	-892844.432	-753500.8077	-711547.5039	-1008237.891	-1074794.47	-980342.6344
468	-533737.2289	-718220.7474	-806956.2085	-835800.4997	-732099.1813	-563402.5712	-780692.7033	-865079.8595	-868587.994	-708080.5666	-526070.4291	-745576.0272	-819052.9031	-820441.4783	-668574.6356	-533293.3784	-747158.8242	-797141.432	-793046.79	-665392.2454	-643159.4654	-794168.9541	-866289.4847	-869336.5794	-744698.354	-636997.0679	-851557.0701	-934649.1885	-936277.5901	-772897.991	-599183.0262	-815518.642	-887519.1062	-887326.6937	-732824.3227	-600436.6333	-810948.4512	-859553.5972	-854300.7242	-723942.7019	-752581.7018	-870117.1609	-925622.6984	-902872.5966	-757297.5273	-710591.5025	-922421.3744	-1004218.52	-1003967.191
469	-674784.8688	-865719.5344	-838292.4265	-793051.0287	-704771.4695	-813404.0858	-1018627.49	-879343.988	-805380.6947	-678127.8788	-719094.3918	-927621.5638	-822673.9882	-763678.6499	-639971.8254	-572464.1311	-785264.45	-783768.6652	-762734.8926	-646998.6772	-790766.2422	-929451.7567	-887152.77	-839202.9056	-727075.1609	-888726.6453	-1088770.716	-948172.3471	-874667.3459	-744492.3186	-792525.0041	-996469.9425	-891219.3108	-832633.7103	-705970.5349	-640314.0864	-849591.9222	-847523.4553	-826010.3149	-707150.0524	-906747.6276	-993183.9789	-936013.0541	-885354.72	-749378.8525	-964049.1423	-1158913.879	-1017000.706	-943953.9971
470	-531952.2822	-709646.7892	-864564.2579	-940782.6313	-773585.406	-552485.9463	-781638.5614	-988337.261	-1031381.819	-747922.7726	-515714.0088	-747071.8337	-918445.9175	-948588.4035	-697311.4944	-526241.5374	-744082.6055	-823403.8405	-827526.3608	-667401.3346	-641436.365	-798773.2473	-935072.7916	-962799.0376	-776622.1608	-627041.0525	-854592.5647	-1060109.941	-1098810.773	-812154.7318	-589711.4466	-818503.8432	-987830.7872	-1014596.895	-761132.8175	-594007.7707	-808545.9309	-886058.0161	-888523.7944	-726136.9152	-750920.4479	-887899.7055	-1005581.263	-984815.3815	-779658.9184	-701596.0975	-927546.5056	-1131882.633	-1166239.749
471	-533636.5417	-723475.4732	-789400.8096	-831214.562	-760654.9045	-562978.0197	-778217.6538	-828600.7664	-869489.7291	-766158.5724	-526141.7359	-743514.2226	-790676.3914	-823068.8651	-715896.0097	-534155.0551	-748023.4393	-790093.8357	-795230.4012	-679862.4117	-641848.5991	-793575.5618	-848318.7296	-870315.5954	-774842.8646	-636471.1589	-848653.2054	-898191.4596	-938062.64	-831447.3356	-599127.0381	-813139.465	-859275.7827	-890428.7379	-780039.7863	-601138.5688	-811601.4546	-852468.5438	-856410.6558	-738093.4592	-750060.6566	-863675.6505	-907236.587	-909416.5646	-789030.8247	-709964.2354	-919088.6945	-967782.1527	-1006635.551
472	-531707.4218	-708470.6067	-872466.9764	-955184.1644	-779276.5196	-550988.3949	-781768.315	-1005245.81	-1053714.007	-753388.3584	-514293.3068	-747277.0297	-932080.731	-966167.7016	-701253.6397	-525274.1602	-743660.6074	-827006.5388	-832256.296	-667676.9431	-641199.9888	-799404.868	-944508.5409	-975620.2927	-781001.4943	-625675.2783	-855008.9763	-1077320.748	-1121107.206	-817540.0031	-588412.1277	-818913.3555	-1001591.624	-1032055.924	-765016.1996	-593125.8541	-808216.3513	-889693.9135	-893218.5427	-726437.9191	-750692.5557	-890339.1292	-1016550.043	-996056.3585	-782726.472	-700362.1006	-928249.5753	-1149395.698	-1188500.429
473	-627738.3663	-817213.0268	-821857.7995	-796538.394	-709643.5455	-730815.5781	-938856.1339	-861855.1731	-809755.9579	-684048.5018	-655527.3604	-866508.3178	-811210.3561	-769469.3209	-646585.8058	-560074.8893	-772821.8384	-785537.987	-769328.8847	-652950.6558	-741516.997	-883676.6757	-873072.4817	-839653.904	-729683.8626	-805460.4117	-1009025.319	-930704.4032	-878534.708	-749955.2978	-728760.2238	-935569.496	-879634.4367	-837821.7047	-712043.0255	-627623.9499	-836899.7269	-848818.2314	-831953.855	-712546.8612	-855295.6358	-950140.3247	-924287.1033	-882769.3516	-749724.1799	-880105.1829	-1079194.442	-999553.6333	-947313.4582
474	-532688.1059	-727286.8266	-789675.1113	-871675.4875	-820923.6688	-557456.3	-775033.5613	-830765.6191	-943915.6069	-868735.5608	-521594.6183	-741179.6672	-793938.1027	-884450.9255	-797801.276	-532244.4724	-747902.6015	-791612.2114	-813899.182	-701863.7044	-639163.3718	-794778.1319	-853006.2306	-913717.2917	-833133.7439	-631233.0611	-845782.316	-901376.9933	-1013659.428	-934448.6517	-594791.6951	-811011.0379	-863144.2711	-952109.1595	-861598.2451	-599274.8478	-811474.6245	-854040.9906	-874856.8092	-759712.1601	-745638.638	-862269.4375	-916337.2873	-955759.0294	-845343.8191	-705009.7592	-916531.0081	-971988.3672	-1083403.248
475	-532052.2582	-729842.0236	-789859.0078	-898801.1884	-861328.8859	-553754.444	-772898.8909	-832216.9736	-993811.9964	-937504.9395	-518546.1524	-739614.5411	-796124.8101	-925602.5154	-852711.9764	-530963.5849	-747821.5898	-792630.1566	-826415.054	-716613.7497	-637363.1491	-795584.3557	-856148.812	-942814.536	-872212.9528	-627721.3501	-843857.6223	-903512.6299	-1064340.815	-1003502.507	-591885.2064	-809584.1038	-865737.7724	-993460.7759	-916276.4397	-598025.3771	-811389.5954	-855095.186	-887223.4279	-774205.7093	-742674.0407	-861326.6881	-922438.5534	-986827.8154	-883097.0198	-701688.1931	-914816.2911	-974808.2858	-1134869.634
476	-533176.7324	-715528.413	-825045.8851	-868766.2542	-745126.3953	-559974.609	-780989.715	-903784.2864	-919707.3721	-720591.5374	-522818.3785	-746045.7299	-850263.6021	-860681.2793	-677598.383	-531079.0086	-746192.8516	-805388.1698	-803873.8236	-666023.1255	-642618.3895	-795614.7621	-887888.3376	-898685.0067	-754722.8445	-633870.7496	-852510.2549	-974045.4964	-987315.1232	-785225.1181	-596208.8271	-816456.034	-919018.2785	-927291.1921	-741713.5582	-598417.8868	-810194.0286	-867876.3294	-865047.2133	-724631.7134	-752060.0465	-875701.1111	-950730.7275	-928603.6967	-764319.2949	-707766.8283	-924030.7323	-1044306.712	-1054922.885
477	-533248.3786	-715872.5639	-822733.5506	-864552.3672	-743461.1761	-560412.7924	-780951.7492	-898836.8467	-913172.9764	-718992.3076	-523234.0757	-745985.6896	-846274.0572	-855537.5785	-676444.9116	-531362.0631	-746316.3282	-804334.0207	-802489.8451	-665942.4825	-642687.5531	-795429.9499	-885127.4383	-894933.5088	-753441.452	-634270.375	-852388.4129	-969009.6162	-980791.1895	-783649.3883	-596589.0076	-816336.2107	-914991.8591	-922182.6822	-740577.281	-598675.9355	-810290.4635	-866812.4662	-863673.5305	-724543.6397	-752126.7277	-874987.336	-947521.2636	-925314.588	-763421.7291	-708127.8957	-923825.0142	-1039182.391	-1048409.412
478	-532413.8187	-728389.0682	-789754.4392	-883376.7675	-838353.3662	-555859.4213	-774112.7233	-831391.6934	-965439.5345	-898400.776	-520279.5941	-740504.5149	-794881.388	-902202.5876	-821488.2393	-531691.9328	-747867.6553	-792051.3249	-819298.1843	-708226.4676	-638386.8053	-795125.9146	-854361.8537	-926269.0412	-849991.4379	-629718.2057	-844952.0561	-902298.2481	-1035521.982	-964236.5822	-593537.916	-810395.4978	-864263.0361	-969947.1075	-885184.9118	-598735.8605	-811437.9453	-854495.7414	-880191.4278	-765964.2779	-744359.7924	-861862.7614	-918969.2054	-969161.2477	-861629.5097	-703576.9271	-915791.3264	-973204.8024	-1105604.429
479	-533752.5236	-723009.3921	-789367.266	-826266.6944	-753284.7846	-563653.2573	-778607.0287	-828336.0319	-860388.3705	-753614.6832	-526697.7918	-743799.7097	-790277.5247	-815562.603	-705880.0149	-534388.6955	-748038.2162	-789908.1573	-792947.4416	-677171.9274	-642176.969	-793428.5024	-847745.5066	-865008.108	-767714.6155	-637111.7131	-849004.2794	-897801.9085	-928818.0937	-818851.5565	-599657.1966	-813399.7452	-858802.7147	-882885.9899	-770066.2018	-601366.4787	-811616.9643	-852276.2532	-854154.9209	-735449.7612	-750601.4145	-863847.6128	-906123.6846	-903749.4578	-782144.4463	-710570.1062	-919401.4677	-967267.785	-997247.8169
480	-525692.0585	-795319.9363	-922996.0153	-857561.0683	-721411.6359	-557134.3822	-938076.4381	-1033245.469	-868700.3292	-687801.4847	-521038.7812	-871013.945	-949322.8323	-816722.3711	-649598.248	-523180.9541	-779409.7347	-830200.0662	-785268.2891	-654721.6706	-650887.2992	-881522.5279	-964092.7418	-881803.1878	-738797.3803	-633553.5448	-1011081.066	-1101708.264	-935958.3316	-753634.6879	-596265.3915	-941781.7499	-1016438.622	-883605.5087	-714940.2151	-591409.3475	-843547.8939	-892401.7415	-847086.4739	-714149.2071	-776082.5399	-967725.1247	-1005189.395	-906045.2501	-756183.125	-709972.6449	-1084085.642	-1170171.038	-1003216.334
481	-532648.0935	-712989.1057	-842107.3793	-899858.2986	-757413.1676	-556741.4856	-781269.8452	-940288.8281	-967921.2231	-732391.4087	-519751.1681	-746488.7356	-879700.345	-898633.9273	-686109.2378	-528990.4994	-745281.7829	-813166.1789	-814085.4695	-666618.1477	-642108.0673	-796978.3931	-908259.5531	-926365.3258	-764177.5622	-630922.1252	-853409.2625	-1011202.594	-1035451.781	-796851.595	-593403.6757	-817340.1464	-948727.0984	-964984.1851	-750097.5467	-596513.882	-809482.4859	-875726.0135	-875182.8926	-725281.5628	-751568.041	-880967.6804	-974411.6644	-952872.2904	-770941.9587	-705102.7032	-925548.6173	-1082116.367	-1102982.354
482	-600737.9061	-789374.655	-812425.8021	-798539.8279	-712439.6787	-683417.2043	-893074.5516	-851818.1665	-812266.9653	-687446.4068	-619045.6029	-831434.8123	-804631.2626	-772792.6452	-650381.6356	-552964.579	-765680.8987	-786553.4186	-773113.243	-656366.5561	-713252.3608	-857405.8972	-864991.6628	-839912.7366	-731181.0227	-757673.0842	-963258.6353	-920679.3747	-880754.2259	-753090.5564	-692164.9761	-900618.1183	-872985.7611	-840799.1467	-715528.0887	-620340.9531	-829615.5486	-849561.3164	-835364.9124	-715644.144	-825766.8212	-925437.1393	-917557.4625	-881285.5827	-749922.3668	-831928.9017	-1033442.656	-989540.5829	-949241.4866
483	-607040.1357	-795872.4632	-814627.3428	-798072.6694	-711787.0279	-694480.5504	-903760.5193	-854160.9236	-811680.8662	-686653.2952	-627560.8805	-839621.3871	-806166.9015	-772016.9416	-649495.6436	-554624.2103	-767347.6793	-786316.4048	-772229.9286	-655569.2442	-719849.6642	-863537.8104	-866877.8224	-839852.322	-730831.5677	-768827.2168	-973941.1255	-923019.336	-880236.1639	-752358.7496	-700706.7437	-908776.187	-874537.6413	-840104.1762	-714714.6334	-622040.8915	-831315.7627	-849387.8715	-834568.7309	-714921.2012	-832659.1989	-931203.1576	-919128.241	-881631.912	-749876.1076	-843173.8207	-1044121.669	-991877.7484	-948791.4617
484	-532218.7929	-710926.9683	-855962.7905	-925107.7319	-767391.0909	-554115.9094	-781497.3352	-969933.678	-1007075.046	-741973.9263	-517260.3276	-746848.4946	-903605.5301	-929454.765	-693020.7892	-527294.4489	-744541.9163	-819482.596	-822378.2104	-667101.3572	-641693.6414	-798085.7795	-924802.7447	-948844.1426	-771855.612	-628527.5868	-854139.3345	-1041377.376	-1074542.917	-806293.3014	-591125.6497	-818058.1223	-972853.2336	-995594.1605	-756906.0715	-594967.6652	-808904.6516	-882100.6369	-883413.9422	-725809.2968	-751168.49	-885244.5908	-993642.6365	-972580.4908	-776320.1354	-702939.2029	-926781.2715	-1112821.083	-1142010.807
485	-530511.2055	-753571.4441	-847984.2748	-827229.9492	-720239.5654	-562534.1934	-849668.7036	-917669.5913	-840523.397	-692291.2643	-525648.5236	-800423.1194	-859116.1999	-796677.1155	-655275.4686	-530068.7764	-761858.0396	-807128.8016	-783675.1554	-660357.6534	-646851.9094	-831748.6062	-897376.2274	-858672.5614	-736592.8969	-637203.6839	-921112.423	-986372.3038	-908068.4042	-757656.0325	-599537.0068	-870471.0303	-926830.5102	-863712.8254	-720078.976	-597581.1511	-825684.4328	-869406.7033	-845221.2641	-719261.4446	-763192.6133	-909925.7706	-946768.1129	-890115.1134	-752946.2286	-711873.1119	-992556.0846	-1055075.007	-975613.4114
486	-532018.2442	-729978.7109	-789868.8452	-900252.2468	-863490.3168	-553556.4174	-772784.6992	-832294.6121	-996481.1468	-941183.6789	-518383.0782	-739530.8165	-796241.7855	-927803.8728	-855649.3617	-530895.0653	-747817.2562	-792684.6104	-827084.5763	-717402.7866	-637266.8483	-795627.4837	-856316.9208	-944371.0599	-874303.4505	-627533.4952	-843754.663	-903626.8733	-1067051.958	-1007196.464	-591729.7272	-809507.7715	-865876.5088	-995672.8335	-919201.3874	-597958.5381	-811385.0468	-855151.579	-887884.9661	-774981.0251	-742515.4529	-861276.2568	-922764.9337	-988489.8047	-885116.5842	-701510.5097	-914724.5643	-974959.1341	-1137622.769
487	-531196.2746	-747636.6585	-837320.9292	-822918.2081	-720072.949	-563301.8073	-837101.0413	-901239.8228	-836517.8858	-692929.512	-526303.8247	-790388.232	-846292.814	-793827.5684	-656082.5178	-531047.9196	-759362.9663	-803849.0901	-783448.6824	-661158.8404	-646278.2558	-824672.9601	-887892.0954	-855384.4113	-736279.5171	-637722.572	-908322.8687	-969976.6409	-904103.6924	-758227.6895	-600002.0855	-860333.8059	-914092.2074	-860884.9673	-720809.4801	-598458.508	-823145.0402	-866137.8278	-844956.1139	-719988.1782	-761360.2369	-901709.2636	-938463.1953	-887850.5539	-752486.0853	-712143.2741	-979544.6374	-1038713.451	-971689.4989
488	-530117.4026	-756982.9763	-854113.9564	-829708.4959	-720335.3427	-562092.9409	-856893.0563	-927114.024	-842825.9116	-691924.3761	-525271.8325	-806191.5403	-866487.5519	-798315.1396	-654811.5471	-529505.9291	-763292.2991	-809014.0999	-783805.3404	-659897.1017	-647181.6665	-835815.9468	-902828.0539	-860562.7105	-736773.0391	-636905.4081	-928464.3274	-995797.1314	-910347.4658	-757327.4231	-599269.6625	-876298.2783	-934152.9533	-865338.3818	-719659.0555	-597076.8141	-827144.1687	-871285.7726	-845373.6821	-718843.6915	-764245.9304	-914648.9198	-951542.0838	-891416.8652	-753210.7358	-711717.8128	-1000035.541	-1064480.228	-977869.02
489	-533637.3754	-717741.1029	-810178.919	-841673.4119	-734420.0044	-562791.8732	-780745.6165	-871975.1272	-877695.009	-710309.42	-525491.07	-745659.7056	-824613.1489	-827610.2758	-670182.2335	-532898.8842	-746986.7344	-798610.6042	-794975.6468	-665504.6379	-643063.0717	-794426.5276	-870137.3617	-874565.0579	-746484.2362	-636440.1083	-851726.8818	-941667.7161	-945370.0243	-775094.0922	-598653.167	-815685.6402	-893130.7441	-894446.4456	-734407.957	-600076.9898	-810814.0493	-861036.3079	-856215.2318	-724065.4506	-752488.7679	-871111.9523	-930095.7419	-907456.6414	-758548.4686	-710088.2814	-922708.0846	-1011360.308	-1013045.046
490	-533752.2234	-723010.5983	-789367.3528	-826279.4991	-753303.858	-563651.5098	-778606.021	-828336.717	-860411.9241	-753647.1459	-526696.3528	-743798.9709	-790278.5569	-815582.0286	-705905.9355	-534388.0909	-748038.178	-789908.6378	-792953.3497	-677178.8902	-642176.1192	-793428.883	-847746.99	-865021.8434	-767733.0629	-637110.0554	-849003.3709	-897802.9166	-928842.0179	-818884.1534	-599655.8246	-813399.0716	-858803.9389	-882905.51	-770092.0127	-601365.8889	-811616.9242	-852276.7508	-854160.7585	-735456.6029	-750600.015	-863847.1678	-906126.5647	-903764.1239	-782162.2677	-710568.5382	-919400.6583	-967269.1161	-997272.1116
491	-528646.3147	-769727.0786	-877011.9642	-838967.3426	-720693.1277	-560444.6	-883880.3116	-962394.5993	-851427.1733	-690553.8306	-523864.6672	-827740.024	-894023.9369	-804434.1339	-653078.5245	-527403.3594	-768650.1118	-816056.8107	-784291.6587	-658176.6674	-648413.5055	-851009.8836	-923193.8694	-867623.5421	-737445.9775	-635791.1703	-955928.064	-1031004.47	-918861.1167	-756099.8715	-598270.9725	-898066.5161	-961506.6347	-871410.8021	-718090.4026	-595192.8156	-832597.1507	-878305.2147	-845943.0542	-717283.1351	-768180.6963	-932292.6919	-969375.7051	-896279.6825	-754198.8275	-711137.6782	-1027975.761	-1099614.326	-986295.0601
492	-531439.9634	-745525.5717	-833527.827	-821384.4611	-720013.6811	-563574.8584	-832630.5468	-895395.5228	-835093.0691	-693156.5457	-526536.9246	-786818.6813	-841731.3551	-792813.9444	-656369.5965	-531396.2146	-758475.4336	-802682.4505	-783368.1227	-661443.8339	-646074.1991	-822156.0532	-884518.4561	-854214.77	-736168.0435	-637907.1477	-903773.4441	-964144.4728	-902693.3886	-758431.0359	-600167.5206	-856727.8525	-909561.0137	-859879.0583	-721069.3307	-598770.5963	-822241.7425	-864975.0428	-844861.7963	-720246.6876	-760708.4349	-898786.5364	-935509.0192	-887045.0182	-752322.4059	-712239.3746	-974916.2824	-1032893.416	-970293.708
493	-532138.8296	-710542.866	-858543.5571	-929810.7965	-769249.6205	-553626.8586	-781539.7084	-975455.4513	-1014368.001	-743758.8059	-516796.3733	-746915.5048	-908058.2095	-935195.5826	-694308.1636	-526978.5355	-744404.1056	-820659.1181	-823922.8509	-667191.3618	-641616.4488	-798292.046	-927884.1485	-953031.1406	-773285.7575	-628081.5701	-854275.3208	-1046997.856	-1081824.195	-808051.9529	-590701.3351	-818191.8555	-977347.068	-1001295.702	-758174.2557	-594679.6604	-808797.0218	-883288.0008	-884947.0918	-725907.5948	-751094.0679	-886041.226	-997224.6774	-976251.4222	-777321.897	-702536.2203	-927010.8707	-1118540.271	-1149280.409
494	-626533.1666	-815970.4259	-821436.7904	-796627.7305	-709768.3544	-728699.8918	-936812.6151	-861407.1586	-809868.0398	-684200.1716	-653898.9511	-864942.7676	-810916.69	-769617.6617	-646755.2375	-559757.5116	-772503.0936	-785583.3121	-769497.8043	-653103.1288	-740255.3693	-882504.0463	-872711.7841	-839665.4573	-729750.6902	-803327.364	-1006982.465	-930256.9234	-878633.779	-750095.244	-727126.7487	-934009.3971	-879337.6647	-837954.6065	-712198.5857	-627298.8641	-836574.5884	-848851.4	-832106.1119	-712685.1124	-853977.5799	-949037.6668	-923986.7173	-882703.1217	-749733.0262	-877954.7737	-1077152.253	-999106.6881	-947399.5181
495	-533659.8511	-717849.0643	-809453.5309	-840351.4995	-733897.6188	-562929.333	-780733.7065	-870423.0966	-875645.1443	-709807.7356	-525621.4759	-745640.8708	-823361.6134	-825996.6774	-669820.3851	-532987.6794	-747025.4694	-798279.9136	-794541.4875	-665479.3399	-643084.7686	-794368.5513	-869271.2571	-873388.1988	-746082.2585	-636565.4723	-851688.6595	-940087.9414	-943323.4415	-774599.7798	-598772.431	-815648.0512	-891867.641	-892843.8867	-734051.5026	-600157.9406	-810844.3014	-860702.57	-855784.3023	-724037.8216	-752509.6861	-870888.0383	-929088.9209	-906424.8355	-758266.8988	-710201.5496	-922643.5501	-1009752.789	-1011001.745
496	-529544.5157	-761945.9223	-863031.146	-833314.176	-720474.6752	-561451.0262	-867402.7248	-940853.3668	-846175.5079	-691390.6435	-524723.839	-814583.1836	-877211.0684	-800698.0645	-654136.6547	-528687.1237	-765378.7964	-811756.7484	-783994.7277	-659227.1116	-647661.3826	-841732.9338	-910759.1298	-863312.4158	-737035.1021	-636471.4896	-939159.5524	-1009507.953	-913662.9437	-756849.3767	-598880.7419	-884775.5006	-944805.3195	-867703.1693	-719048.1737	-596343.1271	-829267.7278	-874019.3596	-845595.4131	-718235.9627	-765778.2495	-921519.9482	-958487.0453	-893310.5961	-753595.5291	-711491.8905	-1010916.323	-1078162.528	-981150.3796
497	-632227.4791	-821841.4513	-823425.9691	-796205.6343	-709178.6586	-738696.0604	-946467.8074	-863523.9318	-809338.4762	-683483.5641	-661592.8395	-872339.66	-812304.2002	-768916.783	-645954.7089	-561257.0538	-774009.0954	-785369.1608	-768699.695	-652382.7262	-746216.2926	-888044.4713	-874416.0035	-839610.8704	-729434.9438	-813405.5617	-1016634.516	-932371.1705	-878165.6896	-749434.0278	-734844.5718	-941380.5332	-880739.8495	-837326.6733	-711463.5967	-628834.8253	-838110.7988	-848694.6857	-831386.7306	-712031.9051	-860205.1144	-954247.4912	-925405.9775	-883016.0439	-749691.2292	-888115.0005	-1086801.162	-1001218.409	-946992.903
498	-598043.747	-786596.8875	-811484.6588	-798739.5349	-712718.6824	-678687.7013	-888506.3753	-850816.6543	-812517.5185	-687785.4565	-615405.3813	-827935.1089	-803974.7877	-773124.253	-650760.3909	-552255.0983	-764968.3617	-786654.7404	-773490.8537	-656707.4013	-710432.0597	-854784.5472	-864185.3428	-839938.5634	-731330.4123	-752904.7707	-958691.9455	-919679.0577	-880975.6938	-753403.3987	-688513.4303	-897130.6011	-872322.3432	-841096.2418	-715875.8352	-619614.2414	-828888.7189	-849635.4629	-835705.2744	-715953.197	-822820.3779	-922972.2068	-916885.9657	-881137.5293	-749942.1422	-827121.7776	-1028877.453	-988541.4611	-949433.869
499	-532090.0281	-729690.2427	-789848.0842	-897189.8982	-858928.7809	-553974.3374	-773025.6922	-832130.7619	-990848.1075	-933419.9787	-518727.2339	-739707.511	-795994.9178	-923158.0753	-849450.2332	-531039.6707	-747826.402	-792569.6898	-825671.6003	-715737.5842	-637470.0839	-795536.4653	-855962.14	-941086.1345	-869891.6139	-627929.9488	-843971.9507	-903385.7712	-1061330.297	-999400.6479	-592057.8544	-809668.8649	-865583.7162	-991004.454	-913028.5075	-598099.5967	-811394.6462	-855032.5659	-886488.8401	-773344.7799	-742850.1403	-861382.6882	-922076.1329	-984982.3026	-880854.4469	-701885.497	-914918.1468	-974640.7802	-1131812.486
500	-532795.2493	-713695.9659	-837358.0167	-891203.2891	-753992.9316	-557641.4816	-781191.8661	-930127.1562	-954500.062	-729106.71	-520604.9793	-746365.4173	-871506.1174	-888069.1499	-683740.0939	-529571.8721	-745535.3947	-811001.0352	-811242.8808	-666452.5129	-642250.1243	-796598.8027	-902588.8722	-918660.0292	-761545.6776	-631742.9259	-853159.0081	-1000859.272	-1022052.108	-793615.1637	-594184.5382	-817094.0384	-940457.1335	-954491.6872	-747763.7182	-597043.8948	-809680.5561	-873540.9179	-872361.4506	-725100.666	-751704.9993	-879501.6396	-967819.6652	-946116.7067	-769098.4255	-705844.3086	-925126.0877	-1071591.394	-1089604.168
501	-533656.5732	-717833.3192	-809559.3212	-840544.2867	-733973.8033	-562909.2859	-780735.4434	-870649.4441	-875944.0957	-709880.901	-525602.4575	-745643.6176	-823544.1369	-826232.0039	-669873.1569	-532974.7296	-747019.8203	-798328.1413	-794604.8051	-665483.0293	-643081.6043	-794377.0065	-869397.5694	-873559.8314	-746140.8827	-636547.1893	-851694.2338	-940318.3351	-943621.9143	-774671.8701	-598755.0376	-815653.5331	-892051.8514	-893077.6032	-734103.4877	-600146.1348	-810839.8894	-860751.2422	-855847.1489	-724041.851	-752506.6354	-870920.6939	-929235.7552	-906575.3136	-758307.9629	-710185.0306	-922652.9617	-1009987.229	-1011299.739
502	-589981.6887	-778284.6374	-808668.3618	-799337.1424	-713553.5789	-664535.0367	-874836.468	-847819.7079	-813267.2794	-688800.0358	-604512.3055	-817462.5227	-802010.3383	-774116.5633	-651893.7865	-550132.0331	-762836.1509	-786957.9377	-774620.824	-657727.3538	-701992.5315	-846940.3642	-861772.4938	-840015.8481	-731777.4488	-738635.9686	-945026.4867	-916685.6878	-881638.4189	-754339.5545	-677586.4676	-886694.4809	-870337.1173	-841985.2752	-716916.4391	-617439.6138	-826713.7386	-849857.3404	-836723.7809	-716878.0136	-814003.3791	-915596.091	-914876.5644	-880694.4912	-750001.3188	-812736.838	-1015216.443	-985551.6677	-950009.5584
503	-533015.3873	-725971.6239	-789580.4567	-857713.4344	-800126.4261	-559361.7073	-776132.312	-830018.5826	-918233.0985	-833338.8084	-523163.7149	-741985.2639	-792812.5677	-863269.5122	-769537.8178	-532903.7667	-747944.2996	-791088.2579	-807457.0528	-694271.6087	-640089.9765	-794363.1551	-851388.6913	-898740.4522	-813019.0198	-633040.5976	-846772.9881	-900277.7453	-987572.8675	-898905.4744	-596287.7135	-811745.5049	-861809.3526	-930824.7892	-833454.4614	-599917.9713	-811518.3904	-853498.3786	-868491.5032	-752252.0873	-747164.566	-862754.6864	-913196.8633	-939767.4042	-825911.6136	-706719.425	-917413.6017	-970536.9078	-1056912.636
504	-530991.8621	-749407.4941	-840502.684	-824204.7558	-720122.6644	-563072.7648	-840851.0107	-906142.1768	-837713.0599	-692739.0701	-526108.2944	-793382.466	-850119.0868	-794677.8231	-655841.7085	-530755.7605	-760107.4523	-804827.6983	-783516.2579	-660919.7803	-646449.4239	-826784.2085	-890721.9936	-856365.5375	-736373.0241	-637567.7449	-912139.0468	-974868.8184	-905286.6927	-758057.1171	-599863.3142	-863358.5754	-917893.0929	-861728.7504	-720591.5105	-598196.7202	-823902.7503	-867113.2027	-845035.2301	-719771.3337	-761906.9858	-904160.9248	-940941.2367	-888526.2586	-752623.384	-712062.6625	-983427.0244	-1043595.452	-972860.3254
505	-526044.1001	-792270.1838	-917516.3625	-855345.3617	-721326.0154	-557528.8417	-931618.1998	-1024802.582	-866641.9873	-688129.4658	-521375.5256	-865857.2426	-942733.1834	-815258.0531	-650012.9723	-523684.1137	-778127.5728	-828514.6964	-785151.9097	-655133.3825	-650592.5116	-877886.5129	-959219.0602	-880113.4816	-738636.3414	-633820.1897	-1004508.802	-1093282.903	-933920.9556	-753928.4495	-596504.385	-936572.4588	-1009892.696	-882152.3362	-715315.6047	-591860.2014	-842242.9573	-890721.9401	-846950.2192	-714522.6592	-775140.923	-963502.8471	-1000921.685	-904881.544	-755946.6678	-710111.4752	-1077399.352	-1161763.204	-1001199.924
506	-532548.8875	-712512.5718	-845309.1901	-905693.1242	-759718.9398	-556134.7481	-781322.4153	-947139.3791	-976969.1779	-734605.8076	-519175.5663	-746571.8714	-885224.5318	-905756.2342	-687706.4102	-528598.5635	-745110.8091	-814625.8232	-816001.8173	-666729.8113	-642012.2987	-797234.2961	-912082.4761	-931559.8968	-765951.8627	-630368.7776	-853577.9729	-1018175.605	-1044485.25	-799033.4543	-592877.2526	-817506.0616	-954302.344	-972057.7644	-751670.9109	-596156.5708	-809348.9557	-877199.1086	-877084.9844	-725403.5155	-751475.7098	-881956.0205	-978855.6995	-957426.607	-772184.7875	-704602.7456	-925833.4681	-1089211.84	-1112001.337
507	-576629.9229	-764518.5232	-804004.2257	-800326.8544	-714936.2708	-641096.4738	-852197.4107	-842856.3939	-814508.9761	-690480.3046	-586472.0247	-800118.6245	-798756.9672	-775759.9518	-653770.8296	-546615.9746	-759304.9461	-787460.0701	-776492.1945	-659416.5214	-688015.6288	-833949.427	-857776.5174	-840143.8411	-732517.7966	-715005.0675	-922394.7967	-911728.297	-882735.9736	-755889.9444	-659490.0658	-869410.9751	-867049.3378	-843457.6245	-718639.8078	-613838.1616	-823111.7021	-850224.797	-838410.5536	-718409.6243	-799401.3384	-903380.3308	-911548.7475	-879960.7654	-750099.3225	-788913.5987	-992592.1202	-980600.2001	-950962.9712
508	-533467.69	-716926.0223	-815655.4093	-851653.5039	-738363.8788	-561754.0878	-780835.5342	-883692.5517	-893170.9507	-714097.0063	-524506.5403	-745801.904	-834061.9132	-839792.5213	-672914.0935	-532228.5032	-746694.2946	-801107.2314	-798253.4359	-665695.6313	-642899.2657	-794864.2332	-876676.2242	-883450.0358	-749519.0624	-635493.643	-852015.4501	-953594.6015	-960821.1881	-778826.0215	-597752.7543	-815969.4273	-902666.8411	-906545.3456	-737099.0948	-599465.8321	-810585.6545	-863555.9418	-859468.6368	-724274.0428	-752330.8414	-872802.4441	-937696.9766	-915246.5053	-760674.247	-709233.1362	-923195.3035	-1023496.655	-1028471.433
509	-531422.0801	-745680.4954	-833806.1867	-821497.0163	-720018.0305	-563554.8203	-832958.6175	-895824.4112	-835197.6304	-693139.8847	-526519.8184	-787080.6355	-842066.1013	-792888.3299	-656348.5291	-531370.6547	-758540.5658	-802768.0652	-783374.0347	-661422.9194	-646089.174	-822340.7583	-884766.0332	-854300.605	-736176.224	-637893.6025	-904107.3071	-964572.4709	-902796.8848	-758416.1132	-600155.38	-856992.4781	-909893.5388	-859952.8777	-721050.2613	-598747.6934	-822308.0316	-865060.3746	-844868.7178	-720227.7167	-760756.2679	-899001.023	-935725.8137	-887104.133	-752334.4176	-712232.3222	-975255.9378	-1033320.524	-970396.1392
510	-531934.7168	-709562.4142	-865131.1696	-941815.7439	-773993.6654	-552378.5175	-781647.8695	-989550.2177	-1032983.848	-748314.8535	-515612.0929	-747086.5537	-919424.0285	-949849.4772	-697594.2893	-526172.1413	-744052.333	-823662.2847	-827865.6689	-667421.1057	-641419.4083	-798818.5574	-935749.6773	-963718.787	-776936.318	-626943.0769	-854622.4366	-1061344.581	-1100410.237	-812541.0513	-589618.2383	-818533.2201	-988817.9386	-1015849.341	-761411.397	-593944.5052	-808522.2881	-886318.8419	-888860.5783	-726158.5081	-750904.0997	-888074.7007	-1006368.123	-985621.7675	-779878.9733	-701507.5751	-927596.9412	-1133138.955	-1167836.648
511	-618311.2673	-807493.3745	-818564.6566	-797237.1864	-710619.8038	-714266.632	-922871.6838	-858350.7938	-810632.6657	-685234.8663	-642789.9057	-854262.5485	-808913.2928	-770629.6458	-647911.1041	-557592.3539	-770328.6089	-785892.5208	-770650.1777	-654143.3033	-731648.5162	-874504.3421	-870251.0972	-839744.2743	-730206.5898	-788775.664	-993046.0709	-927204.206	-879309.6435	-751049.9604	-715983.1445	-923366.3671	-877313.0791	-838861.2662	-713259.8209	-625081.1217	-834356.4862	-849077.6765	-833144.8116	-713628.2647	-844985.7724	-941515.3097	-921937.4771	-882251.2998	-749793.376	-863284.6336	-1063220.395	-996057.6182	-947986.6213
512	-532344.1292	-711529.019	-851917.6379	-917736.0409	-764477.9892	-554882.4587	-781430.9184	-961278.7244	-995643.9032	-739176.2651	-517987.5403	-746743.4613	-896626.2987	-920456.4762	-691002.9292	-527789.6188	-744757.9238	-817638.4882	-819957.1056	-666960.2819	-641814.635	-797762.4728	-919972.882	-942281.3461	-769613.9692	-629226.6835	-853926.1866	-1032567.706	-1063130.076	-803536.7507	-591790.7301	-817848.5058	-965809.4947	-986657.434	-754918.2906	-595419.0905	-809073.3531	-880239.5356	-881010.8485	-725655.2224	-751285.1408	-883995.9267	-988028.0636	-966826.5888	-774749.9514	-703570.847	-926421.3923	-1103856.697	-1130616.266
513	-585541.3516	-773706.5023	-807117.2309	-799666.2865	-714013.4146	-656740.1785	-867307.4978	-846169.0807	-813680.2249	-689358.8353	-598512.7299	-811694.5399	-800928.3792	-774663.0977	-652518.0263	-548962.7132	-761661.7939	-787124.9297	-775243.1773	-658289.1127	-697344.2954	-842620.0262	-860443.5698	-840058.4142	-732023.663	-730777.1453	-937499.9667	-915037.0305	-882003.4278	-754855.1608	-671568.2281	-880946.5826	-869243.7152	-842474.9278	-717489.5721	-616241.895	-825515.8254	-849979.5438	-837284.7434	-717387.3745	-809147.2436	-911533.5502	-913769.8472	-880450.4793	-750033.9114	-804814.0497	-1007692.373	-983904.9803	-950326.6306
514	-533366.4645	-724560.7967	-789478.92	-842736.2417	-777817.0773	-561405.6512	-777310.9495	-829217.2313	-890683.2908	-795368.4628	-524846.8958	-742849.4331	-791605.1985	-840548.0609	-739219.407	-533610.9963	-747989.0294	-790526.2094	-800546.5354	-686127.5142	-641083.952	-793918.0064	-849653.5455	-882674.6909	-791441.8136	-634979.5547	-847835.689	-899098.5743	-959589.6308	-860778.0579	-597892.503	-812533.3727	-860377.376	-907992.8952	-803264.4265	-600607.8544	-811565.3384	-852916.3148	-861663.3946	-744249.6147	-748801.4397	-863275.2163	-909828.1084	-922613.0752	-805066.5499	-708553.3955	-918360.366	-968979.9171	-1028495.971
515	-623693.7009	-813042.8424	-820444.8875	-796838.2085	-710062.4059	-723715.308	-931998.0589	-860351.6308	-810132.1064	-684557.5075	-650062.398	-861254.3113	-810224.8088	-769967.1545	-647154.4206	-559009.7658	-771752.1266	-785690.0986	-769895.7811	-653462.3572	-737282.9583	-879741.3166	-871861.9761	-839692.6771	-729908.137	-798301.8764	-1002169.476	-929202.6552	-878867.1915	-750424.9591	-723278.2605	-930333.7843	-878638.466	-838267.7251	-712565.0875	-626532.9579	-835808.5579	-848929.5455	-832464.831	-713010.8338	-850872.2233	-946439.7908	-923279.004	-882547.0832	-749753.8683	-872888.3824	-1072340.831	-998053.6796	-947602.2766
516	-568667.3374	-756308.833	-801222.6774	-800917.0883	-715760.866	-627118.4305	-838696.1683	-839896.4251	-815249.4862	-691482.3656	-575713.3522	-789775.2533	-796816.7561	-776740.0186	-654890.2409	-544519.1046	-757199.0434	-787759.5265	-777608.2228	-660423.8893	-679680.2308	-826202.0287	-855393.4391	-840220.1723	-732959.3174	-700912.3196	-908897.9479	-908771.8606	-883390.5218	-756814.5495	-648697.9243	-859103.62	-865088.6066	-844335.6887	-719667.5723	-611690.3655	-820963.5575	-850443.9369	-839416.4933	-719323.0301	-790693.1272	-896095.2245	-909564.1391	-879523.1937	-750157.7689	-774706.1462	-979099.665	-977647.2961	-951531.5574
517	-532957.2313	-726205.328	-789597.2763	-860194.4128	-803821.9793	-559023.1271	-775937.0702	-830151.3268	-922796.7359	-839628.6125	-522884.8952	-741842.1139	-793012.569	-867033.3303	-774560.0755	-532786.6138	-747936.8901	-791181.3615	-808601.783	-695620.6815	-639925.3241	-794436.8941	-851676.119	-901401.7524	-816593.2933	-632719.4085	-846596.9512	-900473.0755	-992208.3027	-905221.2974	-596021.8794	-811614.9942	-862046.5601	-934606.9022	-838455.4537	-599803.6918	-811510.6134	-853594.7977	-869622.5823	-753577.7003	-746893.4172	-862668.4604	-913754.899	-942609.0261	-829364.6073	-706415.627	-917256.7697	-970794.824	-1061619.869
518	-532238.4497	-729093.8002	-789805.1585	-890858.1279	-849497.2622	-554838.4368	-773523.974	-831791.9819	-979201.1281	-917367.604	-519438.8169	-740072.8478	-795484.4893	-913552.3357	-836632.7968	-531338.6597	-747845.312	-792332.0777	-822750.1043	-712294.5801	-637890.2978	-795348.2739	-855228.5883	-934294.16	-860769.6164	-628749.6639	-844421.2191	-902887.2639	-1049500.08	-983281.8698	-592736.2965	-810001.9445	-864978.3326	-981352.0237	-900265.3434	-598391.2523	-811414.4939	-854786.4921	-883602.1832	-769961.6479	-743542.1464	-861602.7479	-920651.9553	-977730.1243	-872041.9705	-702660.8279	-915318.4017	-973982.5455	-1119799.033
519	-614572.1292	-803638.1989	-817258.4737	-797514.3534	-711007.0242	-707702.7045	-916531.6565	-856960.8266	-810980.4007	-685705.4226	-637737.7574	-849405.4209	-808002.1921	-771089.8738	-648436.7666	-556607.688	-769339.7013	-786033.142	-771174.2517	-654616.3516	-727734.3097	-870866.2534	-869132.0312	-839780.1186	-730413.9229	-782157.8726	-986708.1067	-925815.8976	-879617.0117	-751484.1443	-710915.2796	-918526.1523	-876392.3424	-839273.595	-713742.4472	-624072.5415	-833347.7423	-849180.582	-833617.1893	-714057.1895	-840896.4971	-938094.308	-921005.5279	-882045.8212	-749820.8218	-856612.9782	-1056884.494	-994670.9685	-948253.6228
520	-527184.4178	-782391.5594	-899766.9116	-848168.3425	-721048.6774	-558806.5575	-910698.9579	-997454.7512	-859974.6967	-689191.8478	-522466.2935	-849153.8788	-921388.2822	-810514.8985	-651356.3294	-525313.9261	-773974.4503	-823055.5206	-784774.9387	-656466.9818	-649637.6483	-866108.8929	-943432.4448	-874640.2595	-738114.7115	-634683.894	-983220.2147	-1065991.842	-927321.5767	-754879.9893	-597278.5221	-919698.7521	-988689.4178	-877445.2836	-716531.5501	-593320.5878	-838016.064	-885280.8011	-846508.8689	-715732.3286	-772090.8789	-949826.2307	-987097.9069	-901112.1183	-755180.7459	-710561.168	-1055741.418	-1134528.916	-994668.4567
521	-648008.3424	-838112.0458	-828938.6552	-795035.8633	-707544.4125	-766398.8199	-973225.6065	-869390.2254	-807870.8766	-681497.6026	-682915.203	-892838.9475	-816149.4597	-766974.4115	-643736.1737	-565412.7916	-778182.7351	-784775.6751	-766487.8645	-650386.247	-762736.0243	-903398.8601	-879138.971	-839459.5914	-728559.904	-841335.6516	-1043383.607	-938230.4633	-876868.4558	-747601.5743	-756233.2665	-961808.4411	-884625.7774	-835586.4583	-709426.6941	-633091.4926	-842368.1567	-848260.3774	-829393.082	-710221.6473	-877463.7161	-968685.6744	-929339.2268	-883883.257	-749575.3957	-916272.4208	-1113541.546	-1007070.701	-945866.0351
522	-633103.4012	-822744.5561	-823731.9526	-796140.7058	-709087.9493	-740233.7112	-947953.0079	-863849.5424	-809257.0166	-683373.3326	-662776.3444	-873477.4798	-812517.6326	-768808.971	-645831.5683	-561487.7194	-774240.7547	-785336.2192	-768576.9266	-652271.9109	-747133.2257	-888896.7217	-874678.1534	-839602.4736	-729386.3745	-814955.8306	-1018119.233	-932696.3924	-878093.6862	-749332.3169	-736031.7584	-942514.391	-880955.5392	-837230.0821	-711350.5378	-629071.0931	-838347.1048	-848670.5792	-831276.0724	-711931.4262	-861163.0588	-955048.8873	-925624.2938	-883064.1788	-749684.7999	-889677.8875	-1088285.395	-1001543.242	-946930.3558
523	-532846.8831	-726648.7697	-789629.1906	-864901.9427	-810834.1028	-558380.6885	-775566.6088	-830403.2021	-931456.005	-851563.1945	-522355.8492	-741570.4941	-793392.0611	-874174.9831	-784089.5532	-532564.3222	-747922.8309	-791358.0208	-810773.85	-698180.4781	-639612.9044	-794576.8102	-852221.4983	-906451.4338	-823375.2947	-632109.9686	-846262.9302	-900843.7045	-1001003.804	-917205.2489	-595517.4728	-811367.3569	-862496.6493	-941783.2686	-847944.5812	-599586.8524	-811495.857	-853777.748	-871768.7472	-756092.9834	-746378.9261	-862504.8509	-914813.7432	-948000.8587	-835916.4867	-705839.1858	-916959.1892	-971284.2068	-1070551.603
524	-531847.6954	-709144.4086	-867939.7309	-946933.9305	-776016.2404	-551846.3001	-781693.9828	-995559.3772	-1040920.524	-750257.2778	-515107.1871	-747159.4787	-924269.7292	-956097.0154	-698995.2953	-525828.3434	-743902.3583	-824942.6541	-829546.649	-667519.0547	-641335.4021	-799043.0302	-939103.0651	-968275.3557	-778492.6971	-626457.6919	-854770.4258	-1067461.16	-1108334.206	-814454.9324	-589156.471	-818678.7574	-993708.4271	-1022054.137	-762791.5191	-593631.0794	-808405.1582	-887611.01	-890529.0532	-726265.4824	-750823.1087	-888941.6519	-1010266.337	-989616.7184	-780969.1567	-701069.0227	-927846.8064	-1139362.955	-1175747.91
525	-533414.9389	-724365.9992	-789464.9005	-840668.2919	-774736.7528	-561687.8652	-777473.6879	-829106.5861	-886879.3991	-790125.7735	-525079.298	-742968.7518	-791438.493	-837410.836	-735033.2452	-533708.6458	-747995.2054	-790448.6055	-799592.3778	-685003.0326	-641221.1934	-793856.5433	-849413.9682	-880456.4389	-788462.5784	-635247.2729	-847982.4196	-898935.7623	-955725.8941	-855513.6812	-598114.0815	-812642.1562	-860179.6583	-904840.4212	-799095.99	-600703.1088	-811571.8206	-852835.9474	-860720.6154	-743144.6872	-749027.4482	-863347.0876	-909362.9734	-920244.5211	-802188.404	-708806.6178	-918491.0889	-968764.9383	-1024572.389
526	-531034.0156	-749042.316	-839846.5489	-823939.4465	-720112.4122	-563119.9975	-840077.6995	-905131.2231	-837466.5935	-692778.3427	-526148.6163	-792765.001	-849330.0405	-794502.4853	-655891.3677	-530816.0089	-759953.9259	-804625.8917	-783502.3226	-660969.0788	-646414.126	-826348.8311	-890138.4176	-856163.2116	-736353.7413	-637599.673	-911352.0822	-973859.9633	-905042.7367	-758092.2922	-599891.9313	-862734.8135	-917109.2819	-861554.7471	-720636.4598	-598250.7055	-823746.4968	-866912.0629	-845018.9149	-719816.0509	-761794.2364	-903655.3481	-940430.22	-888386.9161	-752595.0705	-712079.286	-982626.4063	-1042588.696	-972618.8799
527	-533152.2437	-725421.6573	-789540.8758	-851875.0472	-791429.8286	-560158.4745	-776591.7667	-829706.201	-907493.673	-818537.2641	-523819.85	-742322.1331	-792341.9128	-854412.2694	-757719.1394	-533179.4579	-747961.7361	-790869.161	-804763.2051	-691096.8898	-640477.4466	-794189.6279	-850712.2993	-892477.7207	-804607.825	-633796.439	-847187.2486	-899818.0826	-976664.4833	-884042.701	-596913.2902	-812052.6303	-861251.1415	-921924.4938	-821685.8264	-600186.9005	-811536.6916	-853271.4793	-865829.7799	-749132.5752	-747802.6497	-862957.5986	-911883.6602	-933080.3289	-817785.8215	-707434.3407	-917782.668	-969929.964	-1045835.294
528	-671087.6367	-861907.5653	-837000.8824	-793325.0894	-705154.3502	-806913.7227	-1012358.518	-877969.5988	-805724.5325	-678593.1614	-714098.8649	-922818.8719	-821773.0985	-764133.72	-640491.5967	-571490.5008	-784286.6255	-783907.7105	-763253.093	-647466.4239	-786895.9037	-925854.4415	-886046.2458	-839238.3481	-727280.1703	-882183.022	-1082503.784	-946799.598	-874971.2694	-744921.6364	-787513.9368	-991683.9739	-890308.8931	-833041.4179	-706447.7523	-639316.8097	-848594.4837	-847625.2076	-826477.3984	-707574.1702	-902704.1824	-989801.3177	-935091.5496	-885151.5443	-749405.9907	-957452.2587	-1152648.987	-1015629.597	-944218.0063
529	-525292.2961	-798783.0964	-929218.4595	-860077.1237	-721508.8625	-556686.452	-945410.1193	-1042832.828	-871037.6885	-687429.0443	-520656.3895	-876869.6613	-956805.7374	-818385.184	-649127.3058	-522609.589	-780865.6994	-832113.8954	-785400.4442	-654254.1493	-651222.0466	-885651.4209	-969627.0726	-883721.9412	-738980.2486	-633250.7551	-1018544.229	-1111275.721	-938271.883	-753301.1055	-595994.0014	-947697.1835	-1023871.878	-885255.6652	-714513.9398	-590897.3782	-845029.7205	-894309.2474	-847241.1985	-713725.132	-777151.7972	-972519.7509	-1010035.612	-907366.7017	-756451.6351	-709814.9956	-1091678.287	-1179718.592	-1005506.078
530	-578574.2208	-766523.1589	-804683.4221	-800182.7315	-714734.9218	-644509.6215	-855494.1336	-843579.1568	-814328.159	-690235.6221	-589099.069	-802644.2609	-799230.7265	-775520.6399	-653497.4927	-547127.9866	-759819.1638	-787386.9491	-776219.6836	-659170.543	-690050.9598	-835841.1807	-858358.4156	-840125.2027	-732409.9864	-718446.2236	-925690.4468	-912450.1974	-882576.1466	-755664.175	-662125.2825	-871927.8171	-867528.1077	-843243.2195	-718388.8491	-614362.6088	-823636.2343	-850171.2876	-838164.924	-718186.5896	-801527.7026	-905159.2024	-912033.3476	-880067.6113	-750085.0511	-792382.7633	-995886.6974	-981321.238	-950824.1342
531	-603377.0109	-792095.6598	-813347.7134	-798344.2019	-712166.3764	-688050.0615	-897549.3789	-852799.2132	-812021.532	-687114.2855	-622611.4377	-834863.0004	-805274.3226	-772467.8136	-650010.6199	-553659.5618	-766378.8753	-786454.1673	-772743.3486	-656032.6759	-716015.0299	-859973.6807	-865781.5059	-839887.4375	-731034.6858	-762343.9589	-967732.0063	-921659.2507	-880537.2837	-752784.107	-695741.9038	-904034.3693	-873635.6223	-840508.1227	-715187.4484	-621052.8148	-830327.5257	-849488.6851	-835031.5056	-715341.4064	-828653.0548	-927851.7017	-918215.2375	-881430.6106	-749902.9954	-836637.7939	-1037914.571	-990519.2881	-949053.0354
532	-533677.319	-723311.6068	-789389.0163	-829474.9744	-758063.6934	-563215.422	-778354.5515	-828507.6902	-866289.8434	-761748.3504	-526337.2359	-743614.5951	-790536.1565	-820429.7887	-712374.5531	-534237.1992	-748028.6346	-790028.5543	-794427.7507	-678916.4823	-641964.0485	-793523.8582	-848117.194	-868449.5714	-772336.6912	-636696.3671	-848776.6372	-898054.4999	-934812.4119	-827018.87	-599313.433	-813230.9752	-859109.4598	-887776.8336	-776533.2405	-601218.6981	-811606.9076	-852400.9377	-855617.5771	-737163.9791	-750250.7781	-863736.1096	-906845.3091	-907424.1045	-786609.6891	-710177.2495	-919198.6603	-967601.3096	-1003334.98
533	-532708.4257	-713278.9104	-840160.1942	-896309.8422	-756010.9093	-557110.4738	-781237.8747	-936122.6571	-962418.6982	-731044.7192	-520101.2211	-746438.1765	-876340.804	-894302.4875	-685137.9155	-529228.8556	-745385.7609	-812278.4944	-812920.0401	-666550.2393	-642166.309	-796822.7653	-905934.6378	-923206.241	-763098.5192	-631258.6442	-853306.661	-1006961.948	-1029958.066	-795524.6946	-593723.8205	-817239.2449	-945336.5059	-960682.3792	-749140.7033	-596731.1813	-809563.6925	-874830.1489	-874026.1332	-725207.3972	-751624.1924	-880366.6202	-971709.019	-950102.5772	-770186.1309	-705406.7531	-925375.3849	-1077801.247	-1097497.449
534	-532463.783	-712103.7738	-848055.886	-910698.5704	-761696.9628	-555614.254	-781367.5129	-953016.1724	-984731.0296	-736505.4454	-518681.7822	-746643.19	-889963.4944	-911866.1553	-689076.5558	-528262.3386	-744964.1379	-815877.9894	-817645.7698	-666825.6027	-641930.1429	-797453.8243	-915361.9974	-936016.0962	-767473.9588	-629894.0844	-853722.7024	-1024157.452	-1052234.674	-800905.1776	-592425.6569	-817648.3931	-959085.1076	-978125.8842	-753020.6325	-595850.0489	-809234.4058	-878462.8136	-878716.7072	-725508.1335	-751396.5028	-882803.8749	-982668.0463	-961333.5595	-773250.957	-704173.8534	-926077.8294	-1095298.741	-1119738.336
535	-531683.397	-708355.2039	-873242.3628	-956597.1913	-779834.9113	-550841.4606	-781781.046	-1006904.817	-1055905.161	-753924.6221	-514153.9126	-747297.1628	-933418.5301	-967892.5194	-701640.4289	-525179.2446	-743619.2024	-827360.0226	-832720.3803	-667703.9848	-641176.7964	-799466.8403	-945434.3428	-976878.2684	-781431.1788	-625541.2734	-855049.8332	-1079009.411	-1123294.852	-818068.3866	-588284.6432	-818953.5353	-1002941.788	-1033768.941	-765397.2231	-593039.3236	-808184.0141	-890050.6548	-893679.1746	-726467.4526	-750670.1958	-890578.4768	-1017626.26	-997159.2829	-783027.4494	-700241.0252	-928318.5579	-1151114.018	-1190684.567
536	-533133.4944	-725497.0028	-789546.2984	-852674.9066	-792621.263	-560049.3173	-776528.8214	-829748.9973	-908964.975	-820565.0767	-523729.9594	-742275.982	-792406.3926	-855625.7123	-759338.2992	-533141.6882	-747959.3473	-790899.1773	-805132.2624	-691531.8265	-640424.3632	-794213.4011	-850804.9651	-893335.7153	-805760.1593	-633692.8887	-847130.4949	-899881.0564	-978158.9326	-886078.9019	-596827.5861	-812010.5541	-861327.6165	-923143.8349	-823298.1302	-600150.0572	-811534.1843	-853302.5645	-866194.4362	-749559.9485	-747715.2322	-862929.7996	-912063.5691	-933996.4586	-818899.0556	-707336.3972	-917732.1058	-970013.1153	-1047352.89
537	-531149.9666	-748037.8274	-838041.7308	-823209.6654	-720084.2116	-563249.9195	-837950.5675	-902350.4127	-836788.6432	-692886.3689	-526259.5289	-791066.5523	-847159.6262	-794020.1869	-656027.9643	-530981.7332	-759531.6237	-804070.7861	-783463.9911	-661104.6832	-646317.0326	-825151.2469	-888533.1867	-855606.6777	-736300.7004	-637687.4971	-909187.3939	-971084.9254	-904371.6918	-758189.0476	-599970.648	-861019.0437	-914953.2682	-861076.1197	-720760.1008	-598399.202	-823316.6934	-866358.7913	-844974.0371	-719939.0538	-761484.0986	-902264.6683	-939024.5762	-888003.6295	-752517.1893	-712125.0122	-980424.1617	-1039819.43	-971954.7405
538	-528810.3692	-768305.8669	-874458.3974	-837934.8037	-720653.2278	-560628.4216	-880870.7153	-958460.1388	-850467.9677	-690706.6727	-524021.5932	-825336.955	-890953.1021	-803751.7488	-653271.7898	-527637.8363	-768052.6129	-815271.4134	-784237.4249	-658368.5288	-648276.1319	-849315.4684	-920922.6905	-866836.124	-737370.932	-635915.4292	-952865.3309	-1027078.176	-917911.6814	-756236.767	-598382.3456	-895638.9403	-958456.1748	-870733.6108	-718265.3374	-595402.9176	-831989.0387	-877522.4123	-845879.5583	-717457.167	-767741.8945	-930325.0731	-967386.9145	-895737.3852	-754088.6363	-711202.3743	-1024859.891	-1095696.201	-985355.3951
539	-585348.2106	-773507.3676	-807049.7615	-799680.6033	-714033.416	-656401.1263	-866980.0109	-846097.2835	-813698.1868	-689383.1413	-598251.7669	-811443.6505	-800881.3174	-774686.8702	-652545.1788	-548911.8514	-761610.713	-787132.1933	-775270.2478	-658313.5475	-697142.1115	-842432.1049	-860385.7657	-840060.2657	-732034.3725	-730435.3108	-937172.5863	-914965.319	-882019.3045	-754877.588	-671306.4532	-880696.5668	-869196.1556	-842496.2262	-717514.5017	-616189.7979	-825463.7199	-849984.8593	-837309.1435	-717409.5301	-808936.0167	-911356.8422	-913721.7084	-880439.8656	-750035.3291	-804469.4329	-1007365.099	-983833.3544	-950340.4223
540	-532267.3525	-711160.2235	-854395.5589	-922251.6846	-766262.4549	-554412.897	-781471.6031	-966580.4506	-1002646.227	-740890.0159	-517542.0749	-746807.8011	-900901.5352	-925968.5176	-692239.0007	-527486.2948	-744625.605	-818768.125	-821440.1909	-667046.6997	-641740.5185	-797960.5194	-922931.4894	-946301.4889	-770987.1222	-628798.441	-854056.7537	-1037964.206	-1070121.189	-805225.3186	-591383.3248	-817976.9096	-970124.2463	-992131.7645	-756135.9366	-595142.5629	-808970.0124	-881379.5821	-882482.9008	-725749.6031	-751213.6845	-884760.8153	-991467.3573	-970351.2307	-775711.792	-703183.9236	-926641.8418	-1109347.971	-1137596.169
541	-533675.2093	-723320.0848	-789389.6264	-829564.9751	-758197.7544	-563203.1395	-778347.4689	-828512.5057	-866455.3953	-761976.5212	-526327.1214	-743609.4022	-790543.4118	-820566.3261	-712556.742	-534232.9493	-748028.3658	-790031.9317	-794469.2773	-678965.4217	-641958.0755	-793526.5331	-848127.6208	-868546.1136	-772466.3526	-636684.7155	-848770.2512	-898061.5858	-934980.5683	-827247.9846	-599303.7895	-813226.2407	-859118.0649	-887914.0347	-776714.658	-601214.5525	-811606.6254	-852404.4354	-855658.6084	-737212.0675	-750240.9418	-863732.9816	-906865.5525	-907527.188	-786734.9509	-710166.2288	-919192.971	-967610.6658	-1003505.741
542	-532206.7513	-729221.1824	-789814.3261	-892210.4034	-851511.5507	-554653.8912	-773417.556	-831864.3351	-981688.5723	-920795.9081	-519286.8442	-739994.8229	-795593.5015	-915603.8326	-839370.2154	-531274.8047	-747841.2734	-792382.8245	-823374.0479	-713029.9022	-637800.5528	-795388.4659	-855385.2528	-935744.7213	-862717.8004	-628574.5975	-844325.2689	-902993.73	-1052026.659	-986724.3556	-592591.4017	-809930.8088	-865107.6243	-983413.4922	-902991.1711	-598328.9634	-811410.2551	-854839.046	-884218.6862	-770684.1831	-743394.3547	-861555.7498	-920956.1167	-979278.9713	-873924.0502	-702495.2406	-915232.9193	-974123.1246	-1122364.745
543	-533585.4186	-723680.9146	-789415.5952	-833395.5064	-763903.5405	-562680.3853	-778046.0233	-828717.4574	-873501.4687	-771687.7266	-525896.635	-743388.3843	-790852.2057	-826377.5105	-720310.9068	-534052.0699	-748016.9258	-790175.6799	-796236.6948	-681048.336	-641703.8587	-793640.3833	-848571.3975	-872655.0545	-777984.8877	-636188.8124	-848498.4573	-898363.1678	-942137.4945	-836999.3622	-598893.3524	-813024.7375	-859484.3038	-893753.4657	-784435.9897	-601038.1096	-811594.6181	-852553.3026	-857404.9493	-739258.7609	-749822.2989	-863599.8521	-907727.1373	-911914.5384	-792066.2349	-709697.1768	-918950.8288	-968008.8781	-1010773.52
544	-532703.626	-713255.8551	-840315.1022	-896592.1391	-756122.4658	-557081.119	-781240.4181	-936454.0962	-962856.4507	-731151.8549	-520073.3727	-746442.1987	-876608.0718	-894647.0745	-685215.1889	-529209.8932	-745377.4889	-812349.114	-813012.7557	-666555.6417	-642161.6756	-796835.1462	-906119.5961	-923457.5615	-763184.3623	-631231.8725	-853314.8235	-1007299.312	-1030395.118	-795630.256	-593698.3514	-817247.2721	-945606.244	-961024.6086	-749216.8248	-596713.8941	-809557.2321	-874901.4193	-874118.159	-725213.2974	-751619.7252	-880414.4374	-971924.0275	-950322.9213	-770246.2606	-705382.5644	-925389.1664	-1078144.536	-1097933.799
545	-531959.2025	-709680.0308	-864340.9088	-940375.6108	-773424.562	-552528.2706	-781634.8943	-987859.3864	-1030750.66	-747768.3025	-515754.1611	-747066.0344	-918060.5662	-948091.572	-697200.0802	-526268.8777	-744094.5322	-823302.0199	-827392.6819	-667393.5453	-641443.0456	-798755.3963	-934806.1156	-962436.6794	-776498.3908	-627079.6524	-854580.796	-1059623.524	-1098180.625	-812002.5317	-589748.1684	-818492.2694	-987441.8742	-1014103.463	-761023.0642	-594032.6957	-808555.2456	-885955.2572	-888391.11	-726128.4081	-750926.8886	-887830.7618	-1005271.26	-984497.6855	-779572.2223	-701630.9731	-927526.6353	-1131387.673	-1165610.611
546	-532825.7229	-713842.3453	-836374.4999	-889410.9755	-753284.6555	-557827.8563	-781175.7179	-928022.8369	-951720.7548	-728426.5016	-520781.7899	-746339.88	-869809.2243	-885881.3539	-683249.4822	-529692.2651	-745587.9136	-810552.6687	-810654.2263	-666418.2126	-642279.542	-796520.1957	-901414.5651	-917064.3858	-761000.6566	-631912.9006	-853107.1845	-998717.3357	-1019277.251	-792944.9506	-594346.2423	-817043.0734	-938744.5563	-952318.8591	-747280.4197	-597153.6519	-809721.5733	-873088.4196	-871777.1752	-725063.2051	-751733.3611	-879198.046	-966454.5678	-944717.7337	-768716.6593	-705997.8832	-925038.5886	-1069411.841	-1086833.76
547	-527578.6288	-778976.4906	-893630.8755	-845687.2263	-720952.8009	-559248.2675	-903467.1161	-988000.5278	-857669.7952	-689559.1163	-522843.3751	-843379.4781	-914009.2887	-808875.1764	-651820.7317	-525877.3569	-772538.7039	-821168.2679	-784644.6188	-656928.0108	-649307.5494	-862037.3359	-937974.9667	-872748.1509	-737934.3825	-634982.4791	-975860.689	-1056557.244	-925040.1525	-755208.9394	-597546.1435	-913865.4633	-981359.3838	-875818.0421	-716951.906	-593825.4476	-836554.8148	-883399.7838	-846356.2929	-716150.5147	-771036.4699	-945098.1852	-982318.9871	-899809.0171	-754915.9645	-710716.6282	-1048254.208	-1125113.944	-992410.5098
548	-529927.8368	-758625.1935	-857064.6157	-830901.5998	-720381.4472	-561880.5341	-860370.6599	-931660.3128	-843934.2784	-691747.7663	-525090.5039	-808968.2985	-870035.9168	-799103.639	-654588.2282	-529234.99	-763982.712	-809921.6303	-783868.0078	-659675.4049	-647340.4025	-837773.852	-905452.4124	-861472.5761	-736859.7546	-636761.8263	-932003.3308	-1000333.983	-911444.543	-757169.2396	-599140.9704	-879103.3543	-937677.7749	-866120.8797	-719456.9174	-596834.0403	-827846.8452	-872190.3047	-845447.052	-718642.5967	-764752.9681	-916922.5132	-953840.1413	-892043.4925	-753338.0622	-711643.0561	-1003635.945	-1069007.642	-978954.8076
549	-528435.2085	-771555.9013	-880297.9073	-840296.019	-720744.4711	-560208.0574	-887753.0758	-967457.4835	-852661.484	-690357.1526	-523662.7342	-830832.3057	-897975.5031	-805312.2307	-652829.8298	-527101.6334	-769418.9763	-817067.464	-784361.4471	-657929.7791	-648590.2787	-853190.2659	-926116.4341	-868636.7957	-737542.5465	-635631.2734	-959869.2049	-1036056.844	-920082.855	-755923.7136	-598127.6571	-901190.3333	-965431.9823	-872282.2154	-717865.2955	-594922.4553	-833379.6724	-879312.5288	-846024.761	-717059.1898	-768745.3488	-934824.6341	-971934.8913	-896977.5136	-754340.622	-711054.4268	-1031985.279	-1104656.19	-987504.226
550	-531987.4801	-730102.3387	-789877.7426	-901564.6655	-865445.2363	-553377.3111	-772681.4177	-832364.8328	-998895.2762	-944510.9374	-518235.5847	-739455.0912	-796347.5846	-929794.9039	-858306.0978	-530833.0923	-747813.3366	-792733.8615	-827690.1298	-718116.4358	-637179.7484	-795666.4911	-856468.9679	-945778.8675	-876194.2139	-627363.5886	-843661.5408	-903730.2015	-1069504.068	-1010537.486	-591589.103	-809438.7324	-866001.9898	-997673.5425	-921846.8742	-597898.0851	-811380.9329	-855202.5839	-888483.2984	-775682.2643	-742372.0172	-861230.6439	-923060.1303	-989993.0011	-886943.1916	-701349.8029	-914641.6014	-975095.5698	-1140112.86
551	-533468.9833	-716932.2347	-815613.6688	-851577.4379	-738333.8195	-561761.9976	-780834.8489	-883603.2441	-893052.9966	-714068.1382	-524514.0442	-745800.8202	-833989.8969	-839699.671	-672893.2719	-532233.6127	-746696.5235	-801088.2027	-798228.4533	-665694.1756	-642900.5142	-794860.8971	-876626.3865	-883382.3166	-749495.9316	-635500.8567	-852013.2507	-953503.6975	-960703.4228	-778797.5775	-597759.6171	-815967.2644	-902594.1592	-906453.1305	-737078.5836	-599470.4902	-810587.3953	-863536.7377	-859443.8401	-724272.4529	-752332.045	-872789.5595	-937639.0417	-915187.1328	-760658.0448	-709239.6539	-923191.5901	-1023404.155	-1028353.857
552	-528992.995	-766723.7711	-871615.7616	-836785.3793	-720608.8112	-560833.0522	-877520.4265	-954080.2893	-849400.1781	-690876.8168	-524196.2834	-822661.8536	-887534.6425	-802992.1162	-653486.933	-527898.8563	-767387.476	-814397.1076	-784177.0517	-658582.1093	-648123.2072	-847429.2419	-918394.4096	-865959.5686	-737287.3911	-636053.7544	-949455.8901	-1022707.419	-916854.7681	-756389.1594	-598506.3264	-892936.5579	-955060.3967	-869979.7601	-718460.0753	-595636.8035	-831312.0871	-876650.9951	-845808.8745	-717650.8997	-767253.4194	-928134.7158	-965172.9886	-895133.6987	-753965.9713	-711274.3942	-1021391.298	-1091334.535	-984309.3581
553	-532137.0514	-729501.2762	-789834.4844	-895183.8497	-855940.6618	-554248.1037	-773183.5592	-832023.4287	-987158.0802	-928334.2222	-518952.6796	-739823.258	-795833.2025	-920114.759	-845389.3785	-531134.3972	-747832.3931	-792494.4089	-824746.0041	-714646.7624	-637603.2172	-795476.842	-855729.7341	-938934.2828	-867001.5581	-628189.6532	-844114.2891	-903227.8328	-1057582.216	-994293.8533	-592272.8003	-809774.3921	-865391.9169	-987946.3451	-908984.8475	-598191.9998	-811400.9344	-854954.6041	-885574.2817	-772272.9269	-743069.3835	-861452.4081	-921624.9211	-982684.648	-878062.4544	-702131.1394	-915044.9566	-974432.2365	-1128006.351
554	-527983.339	-775470.4681	-887331.4181	-843140.0305	-720854.3708	-559701.7416	-896042.6682	-978294.5095	-855303.5072	-689936.1663	-523230.4995	-837451.2874	-906433.77	-807191.7835	-652297.5026	-526455.7936	-771064.7192	-819230.7519	-784510.828	-657401.3185	-648968.6589	-857857.3409	-932372.1392	-870805.6497	-737749.2509	-635289.0164	-968305.1566	-1046871.374	-922697.967	-755546.6504	-597820.8926	-907876.8162	-973834.1286	-874147.4621	-717383.4571	-594343.7533	-835054.6482	-881468.6693	-846199.6533	-716579.8385	-769953.9788	-940244.2175	-977412.7901	-898471.2103	-754644.1311	-710876.2287	-1040567.59	-1115448.223	-990092.4268
555	-533780.0206	-722898.8935	-789359.3134	-825093.6533	-751537.4756	-563813.3427	-778699.3417	-828273.2686	-858230.6192	-750640.7763	-526829.6217	-743867.393	-790182.9613	-813783.0174	-703505.4215	-534444.0871	-748041.7196	-789864.1366	-792406.1973	-676534.067	-642254.8189	-793393.6376	-847609.6068	-863749.8082	-766024.6492	-637263.5758	-849087.5121	-897709.5536	-926626.3954	-815865.3475	-599782.8867	-813461.4524	-858690.5596	-881097.7542	-767701.663	-601420.5116	-811620.6414	-852230.6649	-853620.1309	-734822.9929	-750729.6174	-863888.3817	-905859.8375	-902405.8994	-780511.8228	-710713.7461	-919475.62	-967145.8386	-995022.1716
556	-532123.0234	-739608.1917	-822895.755	-817085.3655	-719847.5533	-564340.221	-820099.7431	-879013.9398	-831099.3053	-693792.9216	-527190.3038	-776813.2244	-828945.5778	-789972.7545	-657174.2788	-532372.486	-755987.6779	-799412.3578	-783142.3139	-662242.6712	-645502.2279	-815101.1586	-875062.1393	-850936.2634	-735855.5827	-638424.514	-891021.3992	-947796.8954	-898740.3045	-759001.0164	-600631.2353	-846620.3587	-896860.0699	-857059.4938	-721797.6923	-599645.3801	-819709.7974	-861715.7543	-844597.4237	-720971.2898	-758881.4325	-890594.1269	-927228.4584	-884787.1002	-751863.6122	-712508.7445	-961942.9954	-1016579.846	-966381.3036
557	-524414.7724	-806385.1248	-942877.4292	-865600.1502	-721722.2861	-555703.1945	-961508.3801	-1063878.166	-876168.4568	-686611.4954	-519816.9965	-889723.6217	-973231.5614	-822035.2464	-648093.5345	-521355.3779	-784061.7067	-836314.9671	-785690.5396	-653227.887	-651956.8552	-894714.8086	-981775.5555	-887933.8222	-739381.6654	-632586.0972	-1034926.717	-1132277.372	-943350.3903	-752568.8545	-595398.2694	-960682.2302	-1040188.717	-888877.9456	-713578.2172	-589773.5478	-848282.4976	-898496.439	-847580.8366	-712794.2391	-779498.938	-983044.4984	-1020673.607	-910267.4377	-757041.0451	-709468.9375	-1108345.004	-1200676.554	-1010532.324
558	-533019.2508	-725956.0984	-789579.3393	-857548.6171	-799880.9217	-559384.2	-776145.2824	-830009.7641	-917929.9252	-832920.9618	-523182.2375	-741994.7737	-792799.2812	-863019.4728	-769204.1772	-532911.5494	-747944.7918	-791082.0728	-807381.0057	-694181.9866	-640100.9148	-794358.2564	-851369.5968	-898563.6557	-812781.5724	-633061.9349	-846784.6826	-900264.7691	-987264.9245	-898485.8993	-596305.3735	-811754.175	-861793.5943	-930573.5344	-833122.2337	-599925.5631	-811518.907	-853491.9732	-868416.3629	-752164.0237	-747182.5791	-862760.4146	-913159.7916	-939578.6285	-825682.223	-706739.607	-917424.0204	-970519.7738	-1056599.924
559	-531188.8694	-747700.8106	-837436.1947	-822964.8159	-720074.75	-563293.5098	-837236.8915	-901417.4204	-836561.1834	-692922.6129	-526296.7413	-790496.7042	-846431.4285	-793858.3706	-656073.794	-531037.3355	-759389.9368	-803884.5421	-783451.1304	-661150.1799	-646284.4567	-824749.4443	-887994.6142	-855419.9546	-736282.9046	-637716.963	-908461.1174	-970153.8699	-904146.5489	-758221.5102	-599997.0582	-860443.3843	-914229.9021	-860915.535	-720801.5837	-598449.0243	-823172.4897	-866173.1627	-844958.9801	-719980.3226	-761380.044	-901798.08	-938552.9674	-887875.0326	-752491.0592	-712140.3538	-979685.2847	-1038890.312	-971731.9145
560	-577889.0509	-765816.726	-804444.0735	-800233.5203	-714805.8771	-643306.8295	-854332.3697	-843324.4555	-814391.8789	-690321.8481	-588173.2996	-801754.2276	-799063.7739	-775604.9733	-653593.8165	-546947.5538	-759637.9536	-787412.7169	-776315.7164	-659257.2257	-689333.7099	-835174.5274	-858153.3549	-840131.7709	-732447.9787	-717233.5615	-924529.0609	-912195.8	-882632.4696	-755743.736	-661196.6331	-871040.8829	-867359.3894	-843318.7757	-718477.2869	-614177.7938	-823451.3894	-850190.1443	-838251.4838	-718265.1869	-800778.3726	-904532.3287	-911862.5747	-880029.9589	-750090.0803	-791160.231	-994725.6896	-981067.1445	-950873.0603
561	-579078.4921	-767043.0795	-804859.5778	-800145.3519	-714682.7001	-645394.8524	-856349.1687	-843766.612	-814281.2624	-690172.1615	-589780.4169	-803299.3077	-799353.6003	-775458.5721	-653426.6002	-547260.7816	-759952.5308	-787367.9845	-776149.0054	-659106.7463	-690578.8414	-836331.8242	-858509.3362	-840120.3686	-732382.0248	-719338.7188	-926545.2036	-912637.4288	-882534.694	-755605.6197	-662808.7499	-872580.583	-867652.281	-843187.6116	-718323.7607	-614498.629	-823772.2766	-850157.4095	-838101.2178	-718128.7435	-802079.1945	-905620.569	-912159.0331	-880095.3228	-750081.3497	-793282.5228	-996741.176	-981508.2457	-950788.1256
562	-529043.797	-766283.6713	-870825.0107	-836465.6379	-720596.4556	-560889.9753	-876588.4591	-952861.9237	-849103.1455	-690924.1467	-524244.8779	-821917.7067	-886583.7117	-802780.8052	-653546.7806	-527971.4657	-767202.4514	-814153.8974	-784160.2574	-658641.5221	-648080.6674	-846904.5404	-917691.1045	-865715.7326	-737264.1521	-636092.2331	-948507.4681	-1021491.582	-916560.761	-756431.5512	-598540.8147	-892184.8221	-954115.7753	-869770.0575	-718514.2465	-595701.8648	-831123.7759	-876408.5885	-845789.212	-717704.7914	-767117.5377	-927525.4127	-964557.1293	-894965.768	-753931.8489	-711294.4283	-1020426.421	-1090121.228	-984018.3765
563	-531771.833	-708780.0048	-870388.1436	-951395.7999	-777779.4559	-551382.3301	-781734.183	-1000797.968	-1047839.461	-751950.6204	-514667.0265	-747223.0523	-928494.0543	-961543.4169	-700216.6471	-525528.6315	-743771.6152	-826058.8387	-831012.073	-667604.4435	-641262.1682	-799238.7183	-942026.4401	-972247.6249	-779849.4981	-626034.5491	-854899.4381	-1072793.396	-1115242.066	-816123.3921	-588753.9173	-818805.6321	-997971.7966	-1027463.276	-763994.6648	-593357.8448	-808303.0481	-888737.4803	-891983.5757	-726358.7392	-750752.5034	-889697.4318	-1013664.674	-993099.3873	-781919.5432	-700686.707	-928064.6308	-1144788.836	-1182644.693
564	-532529.6262	-712420.0505	-845930.8366	-906825.9827	-760166.6162	-556016.9472	-781332.622	-948469.4453	-978725.8803	-735035.7435	-519063.8105	-746588.0126	-886297.0783	-907139.0631	-688016.5086	-528522.4673	-745077.6137	-814909.2199	-816373.8851	-666751.4913	-641993.7048	-797283.9809	-912824.7143	-932568.4469	-766296.3513	-630261.3426	-853610.7289	-1019529.448	-1046239.139	-799457.0724	-592775.0451	-817538.2748	-955384.8038	-973431.1327	-751976.3869	-596087.1972	-809323.0302	-877485.1168	-877454.2843	-725427.1932	-751457.7833	-882147.9113	-979718.5296	-958310.8487	-772426.0885	-704505.6765	-925888.7733	-1090589.459	-1113752.415
565	-525196.1368	-799616.1288	-930715.2133	-860682.3385	-721532.2496	-556578.7064	-947174.1713	-1045138.982	-871599.9196	-687339.457	-520564.4086	-878278.2019	-958605.6839	-818785.1588	-649014.0249	-522472.1522	-781215.9188	-832574.25	-785432.2329	-654141.6912	-651302.5672	-886644.5895	-970958.3068	-884183.4803	-739024.236	-633177.9217	-1020339.427	-1113577.088	-938828.3873	-753220.8652	-595928.7209	-949120.0887	-1025659.882	-885652.5958	-714411.4031	-590774.2286	-845386.1607	-894768.0811	-847278.4161	-713623.1245	-777408.9975	-973673.0558	-1011201.327	-907684.5652	-756516.2228	-709777.0744	-1093504.631	-1182015.172	-1006056.855
566	-526968.7087	-784260.2566	-903124.4995	-849525.9886	-721101.1402	-558564.8574	-914656.1617	-1002628.024	-861235.9196	-688990.8815	-522259.9576	-852313.5828	-925426.0061	-811412.1409	-651102.2123	-525005.6214	-774760.0787	-824088.2096	-784846.2487	-656214.7105	-649818.2757	-868336.815	-946418.7315	-875675.6056	-738213.386	-634520.5107	-987247.286	-1071154.376	-928569.9531	-754699.9906	-597132.0819	-922890.6792	-992700.3514	-878335.6967	-716301.5349	-593044.3328	-838815.6474	-886310.0782	-846592.3573	-715503.5006	-772667.8427	-952413.3779	-989712.8921	-901825.1645	-755325.6321	-710476.1016	-1059838.357	-1139680.71	-995903.9865
567	-530922.7917	-750005.8536	-841577.7883	-824639.476	-720139.4631	-562995.3722	-842118.1128	-907798.6658	-838116.9053	-692674.7205	-526042.2254	-794394.2076	-851411.9716	-794965.1214	-655760.3398	-530657.0409	-760359.0116	-805158.3667	-783539.0915	-660839.0027	-646507.2611	-827497.5922	-891678.2067	-856697.0567	-736404.6198	-637515.4294	-913428.5206	-976521.8687	-905686.4245	-757999.4812	-599816.4238	-864380.6349	-919177.3994	-862013.8619	-720517.8593	-598108.2629	-824158.778	-867442.7787	-845061.9631	-719698.0626	-762091.7305	-904989.3329	-941778.5586	-888754.577	-752669.7767	-712035.4241	-984738.87	-1045245.064	-973255.9437
568	-638556.1749	-828366.547	-825636.7552	-795736.5139	-708523.267	-749805.8669	-957198.6507	-865876.5273	-808749.9158	-682687.1219	-670143.8769	-880560.6142	-813846.2881	-768137.8219	-645064.9962	-562923.6547	-775682.8756	-785131.1516	-767812.6711	-651582.066	-752841.3013	-894202.1354	-876310.0839	-839550.2021	-729084.0213	-824606.5359	-1027361.867	-934720.9584	-877645.452	-748699.1478	-743422.2104	-949572.8616	-882298.2468	-836628.7843	-710646.7253	-630541.9026	-839818.153	-848520.5124	-830587.2055	-711305.9264	-867126.4366	-960037.7238	-926983.3525	-883363.8277	-749644.7758	-899407.1424	-1097525.021	-1003565.389	-946540.9883
569	-532022.3485	-729962.2178	-789867.6582	-900077.1568	-863229.5107	-553580.312	-772798.478	-832285.244	-996159.0774	-940739.7888	-518402.7553	-739540.919	-796227.6708	-927538.249	-855294.9261	-530903.3331	-747817.7791	-792678.0398	-827003.7893	-717307.5785	-637278.4683	-795622.2797	-856296.6362	-944183.2441	-874051.2034	-627556.1624	-843767.0864	-903613.0883	-1066724.822	-1006750.738	-591748.4878	-809516.9821	-865859.7684	-995405.9185	-918848.4525	-597966.6031	-811385.5957	-855144.7744	-887805.1425	-774887.4727	-742534.5887	-861282.342	-922725.5514	-988289.263	-884872.8962	-701531.9496	-914735.6324	-974940.9322	-1137290.566
570	-532545.3261	-727860.597	-789716.4053	-877766.5726	-829996.6737	-556625.047	-774554.2204	-831091.5212	-955119.8576	-884177.7475	-520910.0843	-740828.2176	-794429.1286	-893691.5287	-810131.492	-531956.8487	-747884.4103	-791840.7913	-816709.6252	-705175.832	-638759.1312	-794959.1697	-853711.8983	-920251.0876	-841908.9932	-630444.5052	-845350.1253	-901856.5512	-1025039.95	-949954.7177	-594139.0421	-810690.6194	-863726.6427	-961394.6787	-873876.2518	-598994.2787	-811455.5312	-854277.7105	-877633.7375	-762966.6914	-744972.9367	-862057.7428	-917707.3286	-962735.5356	-853821.3128	-704263.9004	-916145.9678	-972621.5808	-1094960.042
571	-532002.0215	-730043.9031	-789873.537	-900944.3194	-864521.1969	-553461.97	-772730.2362	-832331.6413	-997754.1802	-942938.2291	-518305.3011	-739490.8846	-796297.5762	-928853.7954	-857050.3279	-530862.3853	-747815.1893	-792710.5818	-827403.9005	-717779.1124	-637220.9182	-795648.0533	-856397.0992	-945113.4336	-875300.4994	-627443.899	-843705.5572	-903681.361	-1068345.02	-1008958.272	-591655.5723	-809471.3654	-865942.6782	-996727.8595	-920596.4216	-597926.6597	-811382.8774	-855178.4752	-888200.4823	-775350.8069	-742439.8155	-861252.2039	-922920.5985	-989282.4794	-886079.8019	-701425.7648	-914680.8158	-975031.0802	-1138935.859
572	-530767.4828	-751351.3023	-843995.2277	-825616.9716	-720177.2359	-562821.3498	-844967.2714	-911523.3852	-839024.9768	-692530.0262	-525893.665	-796669.1721	-854319.1042	-795611.1295	-655577.3773	-530435.0637	-760924.6585	-805901.8955	-783590.4342	-660657.3691	-646637.3115	-829101.6804	-893828.312	-857442.4985	-736475.6648	-637397.7946	-916327.9834	-980238.8563	-906585.2466	-757869.8834	-599710.9879	-866678.7998	-922065.2432	-862654.953	-720352.25	-597909.3612	-824734.4723	-868183.8508	-845122.0742	-719533.3081	-762507.1403	-906852.0605	-943661.3294	-889267.9652	-752774.0937	-711974.1768	-987688.6371	-1048954.319	-974145.5164
573	-533357.1265	-716394.9327	-819223.7774	-858156.3258	-740933.6259	-561077.8883	-780894.1227	-891327.3836	-903254.7548	-716564.9193	-523865.0411	-745894.5575	-840218.533	-847730.221	-674694.1172	-531791.6968	-746503.7469	-802733.9822	-800389.1756	-665820.0787	-642792.5331	-795149.4332	-880936.8121	-889239.3041	-751496.4925	-634876.9457	-852203.4752	-961365.9138	-970888.8475	-781257.6695	-597166.0641	-816154.3372	-908880.3652	-914428.7391	-738852.5847	-599067.6143	-810436.8372	-865197.6832	-861588.4883	-724409.9571	-752227.9397	-873903.9336	-942649.7843	-920322.2199	-762059.3602	-708675.9412	-923512.7653	-1031404.448	-1038522.949
574	-532191.6181	-710796.4348	-856839.8391	-926706.023	-768022.6942	-553949.7102	-781511.7353	-971810.1994	-1009553.487	-742580.5004	-517102.6572	-746871.2674	-905118.7302	-931405.7264	-693458.291	-527187.0888	-744495.0826	-819882.4257	-822903.1416	-667131.9444	-641667.4082	-798155.8772	-925849.9301	-950267.0535	-772341.6331	-628376.0123	-854185.5482	-1043287.442	-1077017.389	-806890.9621	-590981.4505	-818103.5702	-974380.4198	-997531.7744	-757337.0517	-594869.7896	-808868.0747	-882504.1511	-883934.9683	-725842.7024	-751143.1984	-885515.3196	-994859.9585	-973828.0214	-776660.5744	-702802.2531	-926859.2986	-1114764.694	-1144481.311
575	-532242.0023	-729079.5241	-789804.131	-890706.5748	-849271.5156	-554859.1194	-773535.9005	-831783.8731	-978922.3537	-916983.3851	-519455.8489	-740081.5923	-795472.2721	-913322.4191	-836326.0072	-531345.8161	-747845.7646	-792326.3903	-822680.1773	-712212.1707	-637900.3558	-795343.7694	-855211.0305	-934131.5918	-860551.2783	-628769.2841	-844431.9725	-902875.3319	-1049216.92	-982896.0615	-592752.5353	-810009.9169	-864963.8425	-981120.9895	-899959.8528	-598398.2332	-811414.969	-854780.6022	-883533.0901	-769880.6715	-743558.7098	-861608.0151	-920617.8671	-977556.541	-871831.041	-702679.3857	-915327.9819	-973966.7904	-1119511.487
576	-584187.0226	-772310.1441	-806644.1269	-799766.6774	-714153.6672	-654362.7008	-865011.1176	-845665.6297	-813806.1758	-689529.2724	-596682.824	-809935.2712	-800598.3753	-774829.7939	-652708.4232	-548606.0638	-761303.6081	-787175.8632	-775432.9988	-658460.4525	-695926.556	-841302.2977	-860038.2401	-840071.3971	-732098.7597	-728380.1579	-935204.3337	-914534.1803	-882114.7576	-755012.4237	-669732.6295	-879193.4397	-868910.2211	-842624.2748	-717664.3811	-615876.5836	-825150.4548	-850016.8166	-837455.8402	-717542.7326	-807666.0937	-910294.4513	-913432.292	-880376.0542	-750043.8524	-802397.5525	-1005397.487	-983402.7309	-950423.3395
577	-652246.1767	-842481.3938	-830419.0463	-794721.73	-707105.5478	-773838.1914	-980411.2159	-870965.5753	-807476.7636	-680964.2873	-688641.1663	-898343.8797	-817182.0757	-766452.8019	-643140.4025	-566528.7844	-779303.5353	-784616.2989	-765893.8938	-649850.1073	-767172.2763	-907522.1678	-880407.2891	-839418.9666	-728324.9185	-848836.071	-1050566.878	-939803.9331	-876520.0933	-747109.4824	-761977.0425	-967294.2049	-885669.3146	-835119.1364	-708879.699	-634234.5892	-843511.4387	-848143.7471	-828857.7023	-709735.5159	-882098.3861	-972562.9419	-930395.4719	-884116.1407	-749544.2894	-923833.8881	-1120722.478	-1008642.291	-945563.423
578	-533075.9709	-715044.4069	-828297.9006	-874692.5703	-747468.3223	-559358.3578	-781043.1094	-910742.2545	-928897.1996	-722840.6583	-522233.7511	-746130.1692	-855874.4086	-867915.2645	-679220.5991	-530680.9272	-746019.1968	-806870.7015	-805820.22	-666136.54	-642521.1192	-795874.6777	-891771.2042	-903961.029	-756524.9661	-633308.7254	-852681.6107	-981127.8453	-996490.2372	-787441.1891	-595674.1496	-816624.5507	-924680.9444	-934475.6856	-743311.5929	-598054.973	-810058.4046	-869372.5227	-866979.13	-724755.5783	-751966.2675	-876704.9484	-955244.4454	-933229.4253	-765581.6114	-707259.0313	-924320.0496	-1051513.442	-1064083.286
579	-532326.0076	-728741.9429	-789779.8355	-887122.8481	-843933.3584	-555348.1921	-773817.9237	-831592.1266	-972330.2651	-907897.8812	-519858.5986	-740288.3698	-795183.374	-907885.6545	-829071.4501	-531515.0413	-747856.4675	-792191.9039	-821026.6361	-710263.4604	-638138.1932	-795237.2548	-854795.8466	-930287.3935	-855388.3073	-629233.2357	-844686.2544	-902593.1812	-1042521.121	-973772.9738	-593136.5276	-810198.4371	-864621.2007	-975657.7982	-892736.0134	-598563.3077	-811426.2027	-854641.3266	-881899.2676	-767965.8484	-743950.3792	-861732.5669	-919811.795	-973451.8714	-866843.2563	-703118.2162	-915554.5227	-973594.2354	-1112711.977
580	-533237.1962	-725080.27	-789516.3063	-848250.9159	-786031.4866	-560653.0612	-776876.9695	-829512.2927	-900827.2622	-809349.3263	-524227.1405	-742531.2419	-792049.7576	-848914.2083	-750382.7913	-533350.591	-747972.5597	-790733.1583	-803091.0211	-689126.2089	-640717.9655	-794081.9123	-850292.4345	-888590.1813	-799386.6445	-634265.6214	-847444.3974	-899532.7507	-969893.1928	-874816.7556	-597301.6118	-812243.276	-860904.6366	-916399.7081	-814380.5422	-600353.8361	-811548.0519	-853130.6335	-864177.5369	-747196.1635	-748198.735	-863083.5547	-911068.5001	-928929.3814	-812741.8024	-707878.1188	-918011.7628	-969553.2085	-1038959.123
581	-525020.8923	-801134.2801	-933442.9566	-861785.3059	-721574.871	-556382.3465	-950389.0494	-1049341.808	-872624.5517	-687176.1897	-520396.7789	-880845.182	-961885.9774	-819514.0889	-648807.5772	-522221.6819	-781854.1724	-833413.2185	-785490.166	-653936.7431	-651449.311	-888454.5792	-973384.4007	-885024.6074	-739104.4003	-633045.1872	-1023611.066	-1117771.19	-939842.5827	-753074.6322	-595809.7512	-951713.2472	-1028918.411	-886375.9776	-714224.536	-590549.7958	-846035.7515	-895604.2777	-847346.243	-713437.222	-777877.7296	-975774.884	-1013325.771	-908263.8521	-756633.93	-709707.9654	-1096833.032	-1186200.549	-1007060.614
582	-532282.1098	-738230.0183	-820419.5175	-816084.0949	-719808.8617	-564518.476	-817181.286	-875198.626	-830169.1473	-693941.1352	-527342.4776	-774482.9272	-825967.7367	-789311.0338	-657361.6914	-532599.8622	-755408.273	-798650.7446	-783089.7224	-662428.7225	-645369.0143	-813458.0551	-872859.7382	-850172.6906	-735782.8098	-638545.0099	-888051.4144	-943989.5016	-897819.6208	-759133.7663	-600739.2357	-844266.2968	-893901.9867	-856402.8098	-721967.3297	-599849.1196	-819120.1007	-860956.6574	-844535.8507	-721140.0516	-758455.9188	-888686.0932	-925299.894	-884261.2251	-751756.7579	-712571.4814	-958921.4827	-1012780.372	-965470.0944
583	-531986.7665	-730105.2062	-789877.949	-901595.1074	-865490.5812	-553373.1567	-772679.0221	-832366.4616	-998951.2726	-944588.114	-518232.1636	-739453.3347	-796350.0387	-929841.0864	-858367.7215	-530831.6548	-747813.2457	-792735.0039	-827704.1758	-718132.9891	-637177.7281	-795667.3959	-856472.4946	-945811.522	-876238.0707	-627359.6476	-843659.3808	-903732.5982	-1069560.945	-1010614.982	-591585.8411	-809437.131	-866004.9004	-997719.9494	-921908.237	-597896.6829	-811380.8375	-855203.767	-888497.1768	-775698.5298	-742368.6902	-861229.5859	-923066.9775	-990027.8681	-886985.5602	-701346.0752	-914639.677	-975098.7345	-1140170.618
584	-532067.3446	-710199.4893	-860850.6901	-934015.2044	-770911.0938	-553189.6609	-781577.5889	-980391.7617	-1020887.697	-745354.4382	-516381.6112	-746975.4101	-912038.7799	-940327.7125	-695459.0402	-526696.1178	-744280.9068	-821710.8959	-825303.7162	-667271.8234	-641547.4407	-798476.4424	-930638.8371	-956774.1995	-774564.2675	-627682.8436	-854396.8887	-1052022.408	-1088333.453	-809624.1381	-590322.0098	-818311.4092	-981364.4299	-1006392.72	-759307.9768	-594422.1922	-808700.8037	-884349.4709	-886317.6845	-725995.4704	-751027.5367	-886753.3955	-1000426.922	-979533.132	-778217.4438	-702175.9651	-927216.1261	-1123653.065	-1155779.229
585	-575982.5913	-763851.1028	-803778.0952	-800374.8384	-715003.3076	-639960.1055	-851099.8048	-842615.7583	-814569.1771	-690561.7688	-585597.3806	-799277.743	-798599.2346	-775839.628	-653861.834	-546445.5061	-759133.7432	-787484.4149	-776582.9239	-659498.417	-687337.9888	-833319.5894	-857582.7811	-840150.0466	-732553.6908	-713859.3741	-921297.548	-911487.9486	-882789.1862	-755965.1117	-658612.7007	-868573.0216	-866889.9369	-843529.0082	-718723.3617	-613663.553	-822937.0651	-850242.6124	-838492.3331	-718483.8811	-798693.3899	-902788.076	-911387.4055	-879925.1923	-750104.074	-787758.5802	-991495.2287	-980360.1389	-951009.1953
586	-527312.2792	-781283.8894	-897776.702	-847363.598	-721017.5801	-558949.8251	-908353.3262	-994388.2949	-859227.1071	-689310.9705	-522588.5991	-847280.9648	-918994.9221	-809983.0583	-651506.9572	-525496.6736	-773508.7691	-822443.3944	-784732.6697	-656616.5155	-649530.5815	-864788.2925	-941662.324	-874026.5583	-738056.2222	-634780.7394	-980833.169	-1062931.751	-926581.6019	-754986.6835	-597365.3245	-917806.7379	-986311.9376	-876917.4915	-716667.8916	-593484.338	-837542.1111	-884670.6974	-846459.3812	-715867.9663	-771748.8837	-948292.6997	-985547.875	-900689.4604	-755094.8646	-710611.5912	-1053312.958	-1131475.191	-993936.0967
587	-563866.1871	-751358.6874	-799545.5046	-801272.978	-716258.067	-618690.1772	-830555.4086	-838111.6711	-815695.9868	-692086.5721	-569226.2626	-783538.5754	-795646.8791	-777330.9633	-655565.2053	-543254.7681	-755929.2604	-787940.0878	-778281.1473	-661031.2956	-674654.2881	-821530.6284	-853956.5293	-840266.1972	-733225.5385	-692414.9036	-900759.8373	-906989.2366	-883785.1906	-757372.0529	-642190.6543	-852888.6586	-863906.3567	-844865.1295	-720287.277	-610395.3223	-819668.3042	-850576.0703	-840023.0385	-719873.7808	-785442.3916	-891702.5695	-908367.4922	-879259.3539	-750193.0099	-766139.5675	-970964.2036	-975866.802	-951874.3943
588	-524522.9995	-805447.5478	-941192.8346	-864918.9817	-721695.9641	-555824.4621	-959522.9417	-1061282.592	-875535.6664	-686712.3257	-519920.5209	-888138.3109	-971205.7238	-821585.0752	-648221.0321	-521510.0629	-783667.5352	-835796.8385	-785654.7615	-653354.4585	-651866.2294	-893596.9985	-980277.253	-887414.3605	-739332.1577	-632668.0711	-1032906.225	-1129687.186	-942724.0454	-752659.1648	-595471.7425	-959080.7522	-1038176.321	-888431.2008	-713693.6222	-589912.1526	-847881.3245	-897980.0223	-847538.9482	-712909.0485	-779209.4593	-981746.4552	-1019361.597	-909909.6827	-756968.3517	-709511.6177	-1106289.457	-1198091.757	-1009912.424
589	-531991.9016	-730084.5706	-789876.4638	-901376.0414	-865164.2704	-553403.0527	-772696.2616	-832354.7405	-998548.3115	-944032.7354	-518256.7829	-739465.9746	-796332.3789	-929508.7479	-857924.265	-530841.9992	-747813.8999	-792726.783	-827603.0981	-718013.8683	-637192.2666	-795660.8848	-856447.1153	-945576.5338	-875922.4686	-627388.008	-843674.9246	-903715.3509	-1069151.645	-1010057.306	-591609.3138	-809448.6549	-865983.9554	-997385.9955	-921466.6581	-597906.7736	-811381.5242	-855195.2534	-888397.3045	-775581.4805	-742392.6322	-861237.1995	-923017.7039	-989776.9579	-886680.6669	-701372.9001	-914653.525	-975075.961	-1139754.978
590	-533450.2218	-724224.2121	-789454.6961	-839163.0954	-772494.6803	-561893.28	-777592.14	-829026.0509	-884110.6645	-786309.7827	-525248.4564	-743055.6001	-791317.1533	-835127.3475	-731986.2681	-533779.7218	-747999.7008	-790392.12	-798897.8761	-684184.5573	-641321.0872	-793811.8062	-849239.5874	-878841.8421	-786294.0857	-635442.1366	-848089.2203	-898817.2565	-952913.6001	-851681.9049	-598275.3616	-812721.3363	-860035.7457	-902545.8332	-796061.9145	-600772.4415	-811576.5389	-852777.4504	-860034.3957	-742340.4448	-749191.9528	-863399.4005	-909024.4161	-918520.5241	-800093.491	-708990.9304	-918586.238	-968608.4619	-1021716.536
591	-655842.1794	-846188.9922	-831675.2282	-794455.173	-706733.1503	-780150.8499	-986508.5451	-872302.3341	-807142.34	-680511.7441	-693499.9169	-903015.075	-818058.2993	-766010.1916	-642634.8624	-567475.7569	-780254.5872	-784481.0607	-765389.8815	-649395.1674	-770936.6459	-911020.9894	-881483.5169	-839384.4945	-728125.5222	-855200.5315	-1056662.223	-941139.0966	-876224.4912	-746691.9192	-766850.908	-971949.1348	-886554.8053	-834722.5917	-708415.5477	-635204.5607	-844481.5675	-848044.7808	-828403.4074	-709323.0104	-886031.1227	-975852.9867	-931291.7458	-884313.7536	-749517.8943	-930250.1506	-1126815.839	-1009975.859	-945306.6424
592	-532522.9128	-727950.6663	-789722.8876	-878722.7393	-831420.9363	-556494.5585	-774478.9744	-831142.6807	-956878.6791	-886601.832	-520802.6275	-740773.0478	-794506.2089	-895142.1006	-812067.0653	-531911.6981	-747881.5547	-791876.6734	-817150.8031	-705695.7633	-638695.6743	-794987.5887	-853822.6727	-921276.7501	-843286.5148	-630320.7193	-845282.2809	-901931.8312	-1026826.442	-952388.8298	-594036.5899	-810640.3207	-863818.0623	-962852.3014	-875803.6294	-598950.2355	-811452.5339	-854314.8704	-878069.6544	-763477.5813	-744868.4362	-862024.5114	-917922.395	-963830.6939	-855152.0932	-704146.817	-916085.5249	-972720.9815	-1096774.205
593	-612897.9016	-801912.0146	-816673.6203	-797638.4571	-711180.4051	-704763.6558	-913692.8608	-856338.4582	-811136.1016	-685916.1177	-635475.6195	-847230.605	-807594.2398	-771295.9444	-648672.1361	-556166.7963	-768896.9104	-786096.1063	-771408.9098	-654828.1626	-725981.6939	-869237.2715	-868630.9608	-839796.1681	-730506.7579	-779194.7059	-983870.2348	-925194.2719	-879754.6382	-751678.5534	-708646.1044	-916358.9092	-875980.0755	-839458.2184	-713958.5468	-623620.942	-832896.0696	-849226.6588	-833828.7	-714249.2439	-839065.4928	-936562.5283	-920588.2406	-881953.8166	-749833.1108	-853625.6936	-1054047.546	-994050.0856	-948373.1748
594	-532341.2554	-711515.2146	-852010.3891	-917905.0661	-764544.7836	-554864.8825	-781432.4413	-961477.1736	-995906.0075	-739240.4126	-517970.866	-746745.8696	-896786.3253	-920662.7976	-691049.1967	-527778.2651	-744752.971	-817680.7717	-820012.6191	-666963.5166	-641811.8608	-797769.8859	-920083.6257	-942431.8242	-769665.3677	-629210.654	-853931.0738	-1032769.703	-1063391.76	-803599.9556	-591775.4805	-817853.3121	-965971.0004	-986862.3439	-754963.8684	-595408.7398	-809069.4849	-880282.2087	-881065.9489	-725658.7552	-751282.4661	-884024.5572	-988156.7999	-966958.5198	-774785.9541	-703556.364	-926429.6439	-1104062.241	-1130877.531
595	-533440.5647	-716795.7263	-816530.863	-853248.8884	-738994.3335	-561588.1909	-780849.9081	-885565.6604	-895644.8835	-714702.4773	-524349.1567	-745824.6353	-835572.3614	-841739.9348	-673350.7996	-532121.3383	-746647.5462	-801506.334	-798777.4124	-665726.1629	-642873.0802	-794934.2034	-877721.5052	-884870.3591	-750004.1997	-635342.3442	-852061.5797	-955501.194	-963291.16	-779422.5953	-597608.8174	-816014.7926	-904191.2501	-908479.4357	-737529.2912	-599368.1344	-810549.1441	-863958.7221	-859988.7154	-724307.3876	-752305.5957	-873072.6805	-938912.0849	-916491.7672	-761014.0669	-709096.4355	-923273.1887	-1025436.731	-1030937.444
596	-527893.3547	-776250.0062	-888732.0557	-843706.3806	-720876.256	-559600.915	-897693.4391	-980452.5706	-855829.6338	-689852.332	-523144.4253	-838769.3766	-908118.1303	-807566.0734	-652191.4961	-526327.1825	-771392.4488	-819661.5442	-784540.5754	-657296.0821	-649044.0086	-858786.7317	-933617.8863	-871237.5504	-737790.4135	-635220.8601	-969985.0731	-1049024.955	-923218.7346	-755471.5628	-597759.8042	-909208.3474	-975507.3133	-874518.9031	-717287.5049	-594228.5119	-835388.1991	-881898.0383	-846234.4809	-716484.3816	-770194.6626	-941323.4612	-978503.6466	-898768.6617	-754704.5713	-710840.7427	-1042276.653	-1117597.325	-990607.8354
597	-532489.8445	-712228.9595	-847214.7688	-909165.7589	-761091.2353	-555773.6442	-781353.7027	-951216.5293	-982354.1274	-735923.7217	-518832.9931	-746621.3502	-888512.2877	-909995.1217	-688656.9778	-528365.3003	-745009.0529	-815494.5401	-817142.3443	-666796.2686	-641955.3014	-797386.5985	-914357.7137	-934651.4798	-767007.8492	-630039.4491	-853678.3821	-1022325.639	-1049861.577	-800332.0021	-592563.9485	-817604.8071	-957620.4878	-976267.6514	-752607.3089	-595943.9147	-809269.4843	-878075.8307	-878217.0267	-725476.0964	-751420.7583	-882544.2375	-981500.5961	-960137.1383	-772924.4652	-704305.1925	-926002.999	-1093434.757	-1117369.044
598	-606475.1853	-795289.9806	-814429.9902	-798114.5468	-711845.5334	-693488.7996	-902802.5978	-853950.912	-811733.4058	-686724.3921	-626797.546	-838887.5185	-806029.2423	-772086.478	-649575.0665	-554475.4361	-767198.2642	-786337.6514	-772309.1115	-655640.7176	-719258.2625	-862988.1277	-866708.7415	-839857.7377	-730862.8938	-767827.3276	-972983.5157	-922809.575	-880282.6045	-752424.351	-699941.0345	-908044.8738	-874398.5262	-840166.4754	-714787.5539	-621888.504	-831163.3505	-849403.4196	-834640.103	-714986.0079	-832041.3459	-930686.2748	-918987.4318	-881600.8661	-749880.2544	-842165.7931	-1043164.371	-991668.238	-948831.8033
599	-532962.5305	-714499.4982	-831959.1185	-881364.5974	-750104.9349	-558664.5634	-781103.2224	-918575.7469	-939243.387	-725372.7871	-521575.5599	-746225.2336	-862191.2253	-876059.5053	-681046.9394	-530232.7549	-745823.691	-808539.7808	-808011.5322	-666264.2256	-642411.6094	-796167.2986	-896142.6537	-909900.9356	-758553.8495	-632675.9815	-852874.5283	-989101.3693	-1006819.86	-789936.1093	-595072.1935	-816814.272	-931056.146	-942564.2072	-745110.709	-597646.3935	-809905.715	-871056.9827	-869154.1406	-724895.0292	-751860.6883	-877835.0991	-960326.1265	-938437.2113	-767002.7657	-706687.338	-924645.7718	-1059626.998	-1074396.345
600	-532160.1925	-729408.2822	-789827.7916	-894196.6356	-854470.1523	-554382.8293	-773261.2485	-831970.608	-985342.1485	-925831.4261	-519063.6256	-739880.2192	-795753.6193	-918617.086	-843390.9558	-531181.0139	-747835.3414	-792457.3617	-824290.5008	-714109.9485	-637668.7346	-795447.5002	-855615.3629	-937875.3163	-865579.3074	-628317.4586	-844184.3365	-903150.1083	-1055737.715	-991780.7039	-592378.5791	-809826.324	-865297.5289	-986441.3923	-906994.8866	-598237.4731	-811404.029	-854916.2377	-885124.2104	-771745.448	-743177.2772	-861486.7186	-921402.8713	-981553.929	-876688.4626	-702252.0247	-915107.3621	-974329.6083	-1126133.281
601	-575555.5157	-763410.7737	-803628.906	-800406.4958	-715047.535	-639210.3892	-850375.6618	-842456.9996	-814608.8946	-690615.5146	-585020.3361	-798722.9733	-798495.1708	-775892.1941	-653921.874	-546333.0398	-759020.7925	-787500.4763	-776642.7824	-659552.4475	-686890.9173	-832904.0555	-857454.964	-840154.1407	-732577.3719	-713103.5055	-920573.6406	-911329.3793	-882824.2931	-756014.7031	-658033.8611	-868020.1836	-866784.7726	-843576.1034	-718778.4861	-613548.3553	-822821.8487	-850254.366	-838546.287	-718532.8719	-798226.3225	-902397.3372	-911280.9604	-879901.723	-750107.2088	-786996.5594	-990771.557	-980201.759	-951039.6916
602	-532555.9006	-712546.2589	-845082.8476	-905280.6485	-759555.9401	-556177.6396	-781318.699	-946655.0996	-976329.5595	-734449.2673	-519216.2568	-746565.9943	-884834.0158	-905252.7438	-687593.5028	-528626.2702	-745122.8955	-814522.638	-815866.3468	-666721.9175	-642019.0688	-797216.2058	-911812.2258	-931192.682	-765826.4337	-630407.8948	-853566.0464	-1017682.669	-1043846.655	-798879.2142	-592914.4665	-817494.3327	-953908.2185	-971557.7186	-751559.6866	-596181.8299	-809358.3952	-877094.9725	-876950.5216	-725394.8944	-751482.2369	-881886.1527	-978541.5416	-957104.6531	-772096.9294	-704638.0886	-925813.3315	-1088710.246	-1111363.767
603	-634015.2605	-823684.7133	-824050.4899	-796073.1134	-708993.5183	-741834.4487	-949499.1431	-864188.5121	-809172.2149	-683258.5786	-664008.4059	-874661.9819	-812739.8217	-768696.7358	-645703.3756	-561727.8487	-774481.9184	-785301.926	-768449.1213	-652156.5492	-748087.7788	-889783.9382	-874951.0587	-839593.7323	-729335.8124	-816569.7038	-1019664.865	-933034.9576	-878018.7287	-749226.4329	-737267.6527	-943694.7686	-881180.0782	-837129.528	-711232.8402	-629317.0544	-838593.106	-848645.4838	-831160.8742	-711826.8248	-862160.3057	-955883.1631	-925851.5672	-883114.2887	-749678.1067	-891304.8964	-1089830.524	-1001881.403	-946865.2424
604	-532279.4784	-711218.4699	-854004.2035	-921538.4974	-765980.6217	-554487.0582	-781465.1774	-965743.1119	-1001540.301	-740619.3512	-517612.4303	-746797.6394	-900226.3172	-925097.9623	-692043.7793	-527534.2009	-744646.5031	-818589.7136	-821205.9569	-667033.0511	-641752.2243	-797929.2405	-922464.2158	-945666.5596	-770770.2506	-628866.0763	-854036.1323	-1037111.899	-1069017.033	-804958.6313	-591447.6692	-817956.6299	-969442.7874	-991267.1652	-755943.6253	-595186.2369	-808986.3337	-881199.5266	-882250.4093	-725734.6969	-751224.9701	-884640.0111	-990924.1656	-969794.5594	-775559.8818	-703245.0331	-926607.0247	-1108480.695	-1136493.784
605	-622670.9783	-811988.3814	-820087.6226	-796914.0188	-710168.3177	-721919.9539	-930263.9456	-859971.4494	-810227.2183	-684686.2133	-648680.5431	-859925.7982	-809975.6061	-770093.0352	-647298.1989	-558740.4416	-771481.6423	-785728.561	-770039.1249	-653591.7446	-736212.3513	-878746.2329	-871555.8911	-839702.4812	-729964.8464	-796491.7895	-1000435.927	-928822.9275	-878951.2623	-750543.7163	-721892.1069	-929009.8971	-878386.6276	-838380.5045	-712697.0946	-626257.0928	-835532.6481	-848957.692	-832594.0349	-713128.1526	-849753.7318	-945504.0843	-923024.0989	-882490.881	-749761.3752	-871063.5627	-1070607.846	-997674.4056	-947675.3063
606	-531952.7885	-741082.9442	-825545.5215	-818156.8029	-719888.9563	-564149.4743	-823222.719	-883096.6219	-832094.6467	-693634.3215	-527027.4661	-779306.8235	-832132.0992	-790680.8469	-656973.7328	-532129.1758	-756607.6861	-800227.3431	-783198.5909	-662043.5818	-645644.7768	-816859.407	-877418.8795	-851753.3456	-735933.4554	-638295.5739	-894199.5137	-951871.1025	-899725.5075	-758858.9636	-600515.6665	-849139.3877	-900025.4488	-857762.1967	-721616.1672	-599427.3631	-820340.8186	-862528.0469	-844663.3117	-720790.7016	-759336.7652	-892635.8712	-929292.1721	-885349.8273	-751977.9545	-712441.6111	-965176.2487	-1020645.577	-967356.3683
607	-531956.5997	-730226.4336	-789886.6737	-902882.0447	-867407.5448	-553197.5278	-772577.7459	-832435.3189	-1001318.53	-947850.7717	-518087.5338	-739379.0797	-796453.7837	-931793.4605	-860972.8755	-530770.8851	-747809.4022	-792783.2987	-828297.9722	-718832.7823	-637092.3193	-795705.6459	-856621.5896	-947191.9961	-878092.1238	-627193.0398	-843568.0667	-903833.9202	-1071965.446	-1013891.136	-591447.9472	-809369.4323	-866127.945	-999681.8135	-924502.36	-597837.4037	-811376.8034	-855253.7817	-889083.8921	-776386.154	-742228.0394	-861184.8586	-923356.4427	-991501.879	-888776.7029	-701188.4886	-914558.3249	-975232.5212	-1142612.362
608	-533261.7747	-724981.4996	-789509.1978	-847202.3795	-784469.6342	-560796.1554	-776959.4846	-829456.191	-898898.5311	-806691.065	-524344.9781	-742591.7414	-791965.231	-847323.505	-748260.2334	-533400.1033	-747975.6912	-790693.81	-802607.2235	-688556.05	-640787.5526	-794050.7479	-850170.9589	-887465.4354	-797876.0485	-634401.3656	-847518.7959	-899450.1983	-967934.1178	-872147.498	-597413.9613	-812298.4337	-860804.3856	-914801.2729	-812266.9718	-600402.134	-811551.3387	-853089.8838	-863699.5087	-746635.9194	-748313.3307	-863119.9964	-910832.6573	-927728.4262	-811282.4629	-708006.513	-918078.0448	-969444.2053	-1036969.705
609	-666050.4914	-856714.1011	-835241.2701	-793698.4724	-705675.9905	-798071.1884	-1003817.608	-876097.1173	-806192.9804	-679227.0669	-707292.9101	-916275.6374	-820545.7176	-764753.7119	-641199.7382	-570164.0173	-782954.4278	-784097.1471	-763959.0944	-648103.6866	-781622.9165	-920953.424	-884538.7064	-839286.6353	-727559.4771	-873267.9253	-1073965.654	-944929.3512	-875385.3377	-745506.5432	-780686.8094	-985163.5232	-889068.5311	-833596.8828	-707097.9179	-637958.1102	-847235.5637	-847763.8358	-827113.7576	-708151.9923	-897195.3529	-985192.7469	-933836.0829	-884874.7357	-749442.964	-948464.5998	-1144113.637	-1013761.585	-944577.695
610	-533067.7662	-715004.9959	-828562.7019	-875175.1316	-747659.018	-559308.1784	-781047.4571	-911308.82	-929645.4983	-723023.7972	-522186.1468	-746137.0449	-856331.2789	-868504.3051	-679352.6911	-530648.5126	-746005.0567	-806991.4194	-805978.7089	-666145.775	-642513.1988	-795895.8418	-892087.3738	-904390.6389	-756671.7072	-633262.9616	-852695.5637	-981704.5387	-997237.3378	-787621.6368	-595630.6126	-816638.2725	-925142.0374	-935060.6963	-743441.7158	-598025.422	-810047.3612	-869494.353	-867136.4399	-724765.6642	-751958.6314	-876786.6878	-955611.9832	-933606.0838	-765684.3978	-707217.683	-924343.6078	-1052100.263	-1064829.189
611	-611005.3626	-799960.7439	-816012.5047	-797778.7433	-711376.394	-701441.3689	-910483.8995	-855634.9358	-811312.1053	-686154.2866	-632918.5093	-844772.2032	-807133.0924	-771528.8857	-648938.1966	-555668.4145	-768396.3816	-786167.2808	-771674.1663	-655067.5928	-724000.5451	-867395.8778	-868064.5532	-839814.3104	-730611.6981	-775845.1562	-980662.3177	-924491.5891	-879910.2105	-751898.3126	-706081.0394	-913909.0677	-875514.0509	-839666.9158	-714202.8248	-623110.456	-832385.5008	-849278.7437	-834067.7907	-714466.3413	-836995.7342	-934831.0118	-920116.5409	-881849.815	-749847.0023	-850248.881	-1050840.674	-993348.2424	-948508.3158
612	-533141.523	-725464.7395	-789543.9764	-852332.4027	-792111.0847	-560096.059	-776555.7749	-829730.6717	-908334.9559	-819696.757	-523768.451	-742295.7441	-792378.782	-855106.1099	-758644.9667	-533157.8614	-747960.3702	-790886.3242	-804974.2302	-691345.5844	-640447.0938	-794203.2213	-850765.2851	-892968.3177	-805266.7239	-633737.2295	-847154.7971	-899854.0907	-977519.0018	-885206.9903	-596864.285	-812028.5714	-861294.8695	-922621.7068	-822607.7335	-600165.8337	-811535.2579	-853289.2537	-866038.2885	-749376.9451	-747752.6648	-862941.7033	-911986.5312	-933604.1672	-818422.363	-707378.3371	-917753.7568	-969977.5095	-1046703.048
613	-625307.8591	-814707.0932	-821008.757	-796718.5575	-709895.2457	-726548.9068	-934735.0018	-860951.6693	-809981.9918	-684354.3719	-652243.3729	-863351.0973	-810618.1242	-769768.4774	-646927.496	-559434.8387	-772179.0307	-785629.3934	-769669.5422	-653258.1458	-738972.6922	-881311.8525	-872345.0686	-839677.2034	-729818.6328	-801158.7279	-1004905.528	-929801.9777	-878734.5029	-750237.5252	-725466.0202	-932423.2691	-879035.9412	-838089.7258	-712356.7413	-626968.3546	-836244.0252	-848885.1219	-832260.909	-712825.6701	-852637.5332	-947916.6119	-923681.3196	-882635.7868	-749742.0201	-875768.4866	-1075075.992	-998652.286	-947487.014
614	-590010.4429	-778314.284	-808678.4065	-799335.011	-713550.6012	-664585.5139	-874885.2233	-847830.3968	-813264.6053	-688796.4171	-604551.157	-817499.8744	-802017.3448	-774113.0241	-651889.7441	-550139.6052	-762843.7557	-786956.8564	-774616.7938	-657723.7161	-702022.632	-846968.3414	-861781.0995	-840015.5724	-731775.8544	-738686.8599	-945075.2262	-916696.364	-881636.0552	-754336.2156	-677625.4399	-886731.7026	-870344.1979	-841982.1043	-716912.7277	-617447.3699	-826721.4959	-849856.5491	-836720.1483	-716874.7151	-814034.8259	-915622.3988	-914883.7312	-880696.0714	-750001.1077	-812788.1435	-1015265.167	-985562.3312	-950007.5051
615	-528641.0888	-769772.3508	-877093.3071	-839000.2337	-720694.3987	-560438.7444	-883976.1811	-962519.9299	-851457.7284	-690548.9618	-523859.6684	-827816.5728	-894121.7571	-804455.871	-653072.3681	-527395.8903	-768669.1448	-816081.8292	-784293.3863	-658170.5557	-648417.8815	-851063.8585	-923266.2168	-867648.625	-737448.368	-635787.2121	-956025.6261	-1031129.54	-918891.3606	-756095.5108	-598267.4248	-898143.8456	-961603.8058	-871432.3738	-718084.8301	-595186.1229	-832616.5218	-878330.1505	-845945.0768	-717277.5913	-768194.6742	-932355.3697	-969439.0573	-896296.9572	-754202.3376	-711135.6173	-1028075.016	-1099739.136	-986324.9928
616	-624244.8288	-813611.0736	-820637.4115	-796797.3556	-710005.3317	-724682.794	-932932.5433	-860556.5042	-810080.8523	-684488.1502	-650807.0562	-861970.2246	-810359.0999	-769899.3194	-647076.9409	-559154.9	-771897.886	-785669.3718	-769818.5355	-653392.6325	-737859.8903	-880277.5504	-872026.9201	-839687.3939	-729877.5772	-799277.3017	-1003103.656	-929407.2841	-878821.8871	-750360.9629	-724025.2353	-931047.2047	-878774.1774	-838206.9501	-712493.9511	-626681.617	-835957.2411	-848914.3778	-832395.2052	-712947.6127	-851474.9595	-946944.0272	-923416.3681	-882577.3696	-749749.8229	-873871.7469	-1073274.707	-998258.064	-947562.922
617	-566707.6005	-754288.279	-800538.0878	-801062.3557	-715963.8139	-623678.18	-835373.2672	-839167.9229	-815431.7391	-691728.991	-573065.4473	-787229.5617	-796339.2348	-776981.2308	-655165.7483	-544003.0269	-756680.7424	-787833.2282	-777882.8976	-660671.8208	-677628.7379	-824295.2532	-854806.9203	-840238.9588	-733067.9837	-697443.8383	-905576.1281	-908044.2278	-883551.618	-757042.1117	-646041.7822	-856566.7927	-864606.0349	-844551.7962	-719920.5238	-611161.7538	-820434.8601	-850497.8712	-839664.0734	-719547.8359	-788549.8782	-894302.2274	-909075.6909	-879415.4994	-750172.1536	-771209.434	-975778.9265	-976920.5327	-951671.4968
618	-525612.1016	-796012.607	-924240.5736	-858064.3074	-721431.0823	-557044.7912	-939543.2562	-1035163.048	-869167.8272	-687726.9924	-520962.2986	-872185.1535	-950819.4968	-817054.9522	-649504.0543	-523066.6747	-779700.9439	-830582.8534	-785294.7216	-654628.1611	-650954.2524	-882348.3526	-965199.6697	-882186.9599	-738833.956	-633492.9835	-1012573.782	-1103621.862	-936421.0677	-753567.9677	-596211.1105	-942964.9026	-1017925.357	-883935.5584	-714854.9553	-591306.9479	-843844.2758	-892783.2639	-847117.4205	-714064.3874	-776296.4033	-968684.1035	-1006158.693	-906309.5551	-756236.83	-709941.1133	-1085604.256	-1172080.656	-1003674.308
619	-622257.069	-811561.6272	-819943.0328	-796944.7002	-710211.1816	-721193.3504	-929562.127	-859817.585	-810265.7113	-684738.3022	-648121.2882	-859388.1314	-809874.7505	-770143.9808	-647356.3879	-558631.4426	-771372.1738	-785744.1273	-770097.138	-653644.1093	-735779.0625	-878343.5093	-871432.0144	-839706.449	-729987.7974	-795759.2235	-999734.3368	-928669.2467	-878985.2869	-750591.779	-721331.1122	-928474.1025	-878284.7053	-838426.1479	-712750.5196	-626145.4466	-835420.9837	-848969.0833	-832646.3254	-713175.633	-849301.0635	-945125.3915	-922920.9354	-882468.1353	-749764.4133	-870325.0341	-1069906.484	-997520.9084	-947704.8625
620	-528816.3191	-768254.3229	-874365.7855	-837897.3559	-720651.7808	-560635.0884	-880761.5643	-958317.4452	-850433.1796	-690712.2159	-524027.2845	-825249.8013	-890841.7301	-803727.0003	-653278.799	-527646.3402	-768030.9431	-815242.9289	-784235.458	-658375.4871	-648271.1496	-849254.0159	-920840.3202	-866807.5662	-737368.2102	-635919.9358	-952754.2527	-1026935.779	-917877.2476	-756241.7319	-598386.3849	-895550.8978	-958345.5418	-870709.0507	-718271.6819	-595410.5375	-831966.9839	-877494.0219	-845877.2554	-717463.4787	-767725.9802	-930253.7122	-967314.7857	-895717.7173	-754084.6399	-711204.7207	-1024746.885	-1095554.1	-985321.3157
621	-529629.6575	-761208.3346	-861705.8829	-832778.3037	-720453.9678	-561546.4268	-865840.7891	-938811.4404	-845677.6944	-691469.9663	-524805.2812	-813336.0266	-875617.3509	-800343.9167	-654236.9565	-528808.8137	-765068.7034	-811349.1389	-783966.5812	-659326.6848	-647590.0877	-840853.5575	-909580.4218	-862903.7576	-736996.1546	-636535.9781	-937570.0395	-1007470.266	-913170.2009	-756920.4234	-598938.5428	-883515.6249	-943222.1762	-867351.7171	-719138.9623	-596452.1669	-828952.1267	-873613.0968	-845562.4597	-718326.2827	-765550.5178	-920498.7833	-957454.8925	-893029.1518	-753538.3415	-711525.4668	-1009299.233	-1076129.08	-980662.7074
[truncated: 9,378 more rows]
[truncated: 54 more columns]
