# Supplementary material for: Particle Swarm Optimization of Support Vector Machine Inversion Model for Overhead Upright Piers Damage-Inducing Factor
Source: Hindawi journal article supplement (doi:10.1155/2023/8871629), 2023-12-13
Supplement: f1 [file 8871629.f1.zip › data_hz.txt]

	0	1	2	3	4	5	6	7	8	9	10	11	12	13	14	15	16	17	18	19	20	21	22	23	24	25	26	27	28	29	30	31	32	33	34	35	36	37	38	39	40	41	42	43	44	45	46	47	48
0	-609784.1738	-795872.8837	-869901.0364	-881646.5317	-794899.1287	-775526.9982	-988020.6576	-1030768.739	-1025111.53	-904217.9098	-753369.5711	-968672.2768	-1008543.322	-1003813.019	-883721.6811	-720334.2	-931957.0084	-969532.7123	-965612.553	-849452.5025	-701167.3298	-850364.7339	-906769.9435	-899768.0613	-792502.2201	-824054.4502	-1033444.044	-1074962.568	-1068145.395	-944467.2001	-800804.0312	-1012728.82	-1051392.484	-1045587.336	-922704.9894	-765427.2553	-973673.004	-1010112.177	-1005122.513	-886099.6098	-792550.4891	-904856.5842	-943638.7945	-917889.5285	-790105.3115	-872581.8269	-1078867.369	-1119156.409	-1111179.26
1	-597124.0603	-837882.1456	-945463.9746	-1005437.712	-812176.6608	-673355.0307	-958459.9243	-1075835.313	-1153283.797	-1129601.577	-605700.9296	-878129.0239	-996776.7985	-1079709.874	-1067146.491	-550127.3035	-791807.651	-897617.575	-967621.5385	-949484.1423	-702970.7671	-892839.4303	-979367.5824	-1027285.423	-966663.9235	-733887.7975	-1008471.608	-1116806.272	-1184104.444	-1147651.728	-670055.8245	-932219.9628	-1041565.26	-1114128.755	-1087698.263	-615241.8862	-848117.9972	-945458.334	-1006012.184	-974037.0315	-808817.474	-947796.715	-1013271.151	-1049133.07	-1121151.186	-794420.4942	-1058483.229	-1157777.247	-1214925.09
2	-602052.1254	-749422.4512	-801230.3732	-803226.1066	-713938.7226	-763748.2851	-937910.0732	-949960.8366	-906239.0642	-746943.3046	-761169.2696	-951786.8097	-958180.3538	-913199.0631	-751518.604	-750894.7692	-959550.4037	-970027.4896	-932327.431	-777137.732	-688227.6636	-810383.1242	-850721.0389	-836691.1599	-720271.7783	-813534.4897	-989006.9567	-1003899.084	-963246.4732	-805364.307	-806948.4495	-998159.1367	-1007522.685	-965786.0955	-806131.8386	-791245.5728	-999370.6509	-1012280.903	-977227.4356	-824053.5825	-774403.2039	-871343.7962	-900211.642	-870156.1507	-726604.8345	-863320.6319	-1040103.761	-1057837.331	-1020253.886
3	-584114.3442	-769802.8409	-819846.6332	-853207.2939	-768259.8495	-694057.854	-909405.5176	-954353.3382	-947165.7882	-822868.2965	-664882.1824	-882397.7383	-923031.4412	-917983.539	-795188.1096	-647170.3062	-860216.2523	-896691.1864	-894044.8951	-776241.3293	-683797.5113	-830964.7982	-865139.0234	-879168.1046	-774632.3819	-752596.5616	-964606.8327	-1008204.547	-999934.3721	-873120.8457	-722573.8886	-936492.1469	-975871.5612	-969766.9856	-844431.7994	-700979.4489	-910455.4163	-945814.8337	-942064.894	-821605.1033	-783480.6821	-892126.7535	-910431.352	-905128.8509	-781004.9182	-811135.2068	-1019808.085	-1062055.764	-1052702.948
4	-539368.2166	-758092.5911	-808560.9994	-807188.4066	-717150.1305	-754909.8131	-919291.8149	-925997.1401	-884073.3306	-731006.0787	-746802.1748	-919138.0033	-919982.4014	-877858.5915	-722944.4085	-739908.6945	-923924.1104	-928193.6252	-892610.6521	-743340.9645	-712392.5252	-832102.4035	-861405.9576	-842023.7812	-725159.0448	-807736.2093	-973905.3701	-983484.5861	-944057.5997	-791505.0049	-796337.9138	-970029.3765	-973952.399	-934503.5347	-780510.5947	-783607.799	-968224.5768	-975254.1652	-941956.5427	-793566.9258	-885416.8339	-906112.2159	-914250.8525	-876859.0933	-733167.9585	-860562.5573	-1028518.863	-1040972.039	-1004041.869
5	-581600.0113	-788402.7945	-864803.6087	-889890.7758	-807118.3365	-683097.8293	-919390.9203	-985405.9362	-993755.9707	-895068.2071	-642362.2108	-874113.8364	-938219.4351	-949363.8092	-852947.5975	-614030.669	-831154.4403	-889321.2874	-897627.8874	-802911.6417	-683748.6857	-846431.3619	-905109.3215	-908635.5802	-807612.4133	-742512.6408	-973217.8603	-1035536.148	-1040486.813	-936629.2863	-702628.2577	-928759.6717	-989135.4178	-996913.7506	-894971.8074	-672064.0735	-884162.7403	-938991.438	-944314.4252	-843969.9713	-785897.3577	-904459.9293	-945414.9671	-927380.3314	-808106.4854	-801927.3897	-1027044.738	-1085666.368	-1087217.656
6	-624704.2759	-850098.1295	-944889.1736	-826679.6145	-899261.1402	-756862.249	-1019344.555	-1121459.855	-1168856.109	-1072747.498	-710582.272	-967051.6842	-1069457.867	-1122734.826	-1028273.216	-657999.6657	-894565.5097	-987124.0865	-1031391.82	-939637.5161	-722021.97	-903049.794	-994258.7397	-1005303.09	-915887.217	-808117.8924	-1062535.248	-1157589.066	-1197975.902	-1096197.116	-763408.7573	-1011799.476	-1106916.475	-1153056.721	-1052480.655	-710648.2781	-939961.9302	-1025749.562	-1063554.768	-965462.5616	-819339.6729	-956001.4672	-1043628.252	-1183926.502	-932513.2938	-859373.4645	-1105725.862	-1193718.276	-1227095.678
7	-631892.6529	-695572.6526	-844051.4729	-844018.8205	-750953.3522	-802116.9489	-995786.0934	-1005637.064	-960704.106	-808409.7137	-792359.3035	-996521.1503	-999589.8059	-953826.8495	-800100.9577	-772349.3717	-982577.395	-989033.8964	-949714.8361	-801919.1887	-734895.4644	-864490.6151	-903140.2033	-875628.4427	-756109.2033	-849373.962	-1042028.577	-1054413.71	-1012111.102	-860159.8204	-836626.9948	-1039241.19	-1045039.636	-1002144.038	-849117.1092	-812011.1042	-1020206.528	-1029064.16	-992285.903	-845139.0028	-837898.2702	-1033408.577	-962228.8769	-907238.0023	-761265.0551	-896630.9011	-1088271.01	-1103190.355	-1063518.097
8	-613618.2449	-834110.1145	-915958.4117	-948377.4921	-866533.4434	-761824.0318	-1013449.608	-1092525.775	-1112393.306	-1029913.309	-718901.9386	-961411.2788	-1039580.368	-1063320.164	-983708.505	-667198.3256	-887355.7746	-957176.3947	-975588.0684	-896394.1992	-710857.5574	-882758.713	-945716.8912	-954711.4472	-856842.458	-811843.2209	-1056182.33	-1129960.17	-1144886.36	-1055614.041	-770658.7455	-1006015.736	-1078811.036	-1097602.564	-1010602.734	-719196.6533	-933208.4277	-998274.0588	-1012362.918	-925653.6315	-808096.866	-931407.3115	-975475.3003	-961045.3555	-847151.4648	-861862.3476	-1098914.99	-1167394.581	-1177379.414
9	-646562.8319	-691771.7167	-852293.77	-850113.9957	-755707.6732	-837490.4751	-1028158.525	-1032468.861	-982085.4492	-825333.6578	-831903.2242	-1034307.575	-1031325.813	-979807.0677	-821199.7512	-807953.1561	-1017818.517	-1019091.201	-974858.2918	-822532.2645	-748603.6637	-875273.1437	-911863.0833	-880900.7879	-759302.1145	-880833.4209	-1070797.064	-1078222.356	-1031033.096	-875092.6371	-871876.4737	-1073004.997	-1073358.798	-1025292.886	-867906.4642	-843513.2417	-1051546.902	-1055768.657	-1014609.44	-863456.4453	-850644.4889	-1058774.571	-971432.3408	-911687.5176	-762896.5566	-924176.2908	-1113435.553	-1123975.851	-1079980.742
10	-583898.5733	-757553.5537	-817978.3691	-825343.8536	-738548.1816	-715505.7618	-907999.9558	-940815.519	-917198.3115	-778401.7022	-697866.5818	-899266.545	-927481.5154	-904118.8206	-764876.6946	-685626.0551	-893017.2521	-921502.2632	-902029.1749	-767763.3668	-678575.6167	-818999.0591	-865199.3097	-855526.5052	-744840.3934	-771197.0957	-962647.236	-995957.7917	-973066.2211	-833364.882	-751346.7037	-951226.3529	-980009.9983	-957500.768	-817621.1991	-734440.2432	-939819.3999	-968662.7702	-949786.3164	-814838.6142	-773252.6638	-880444.5628	-912420.187	-885709.0932	-751132.606	-826888.367	-1017294.454	-1051100.064	-1028934.131
11	-590654.6781	-825834.3052	-929377.1416	-984643.6933	-802616.7429	-662381.0602	-940127.9272	-1050228.452	-1118810.695	-1084940.513	-597830.9884	-864434.6128	-975327.4499	-1048953.319	-1025200.311	-548617.7864	-787308.3848	-886440.2704	-948554.8501	-920171.7851	-696867.542	-882534.8184	-965544.4846	-1008060.073	-942799.1633	-724228.1344	-992220.2327	-1094073.884	-1153435.445	-1107824.149	-663059.4727	-920110.3296	-1022524.519	-1086742.569	-1050264.581	-613921.4758	-844367.3962	-935773.5526	-989307.5166	-948219.0194	-803080.4059	-939235.3316	-1001711.785	-1031476.391	-1082981.584	-786075.1393	-1044312.476	-1137919.329	-1188060.195
12	-568898.3941	-787483.7434	-872578.9177	-901322.6513	-804712.2969	-630727.3049	-883520.8575	-966451.3504	-996325.9164	-911280.6199	-577073.6229	-822108.1438	-904180.3039	-936651.9036	-854390.6548	-548778.1513	-773367.9074	-847171.0322	-872241.489	-787264.2756	-676776.8221	-848491.3189	-914534.6543	-920755.3339	-806914.3619	-696358.1263	-941886.8839	-1019348.212	-1043709.594	-951597.4919	-644746.2933	-882595.0625	-959102.0027	-986076.3395	-896293.0929	-614418.9762	-832733.7416	-901525.0622	-921717.7812	-829246.9208	-784655.2461	-909498.8943	-956490.3322	-940187.9618	-809116.4309	-761988.8851	-1000252.848	-1072245.074	-1091093.256
13	-543936.7336	-791566.9731	-825957.048	-810535.6121	-715198.0791	-924070.6899	-1044168.076	-1014901.022	-943078.0699	-762651.7384	-942393.9103	-1075601.637	-1038252.554	-964969.5137	-779786.2103	-923723.4866	-1082001.724	-1053295.277	-991676.7241	-813980.9525	-774162.7311	-867483.3812	-876063.0883	-843349.0813	-716431.8116	-958490.525	-1084749.217	-1062135.825	-996062.3083	-819105.7764	-970976.7546	-1109776.51	-1079443.43	-1012164.65	-831224.6422	-946516.497	-1108966.069	-1086620.205	-1030245.072	-856773.6339	-1004388.729	-943399.7892	-926169.0644	-876162.4878	-717665.5432	-992910.3246	-1125330.296	-1109370.641	-1049046.547
14	-579118.6488	-753749.4934	-805622.1645	-805639.5527	-715675.6965	-758436.0737	-932125.6744	-941600.2479	-897548.1686	-740239.2291	-750893.5974	-938899.3615	-943375.3694	-898753.6604	-739163.169	-738397.7637	-943487.4453	-953133.147	-915998.8197	-762513.2943	-669117.9649	-815921.4608	-856426.414	-839774.8397	-722795.2681	-809522.205	-984525.3681	-996923.0187	-955783.1494	-799552.2947	-798441.2554	-987053.2452	-994572.2736	-953032.788	-795035.0279	-780452.4494	-985112.4142	-997309.8058	-962739.8289	-810820.7083	-759117.2796	-878093.4302	-907230.6015	-873910.0642	-729914.8404	-860608.2738	-1036925.007	-1052245.782	-1014018.138
15	-658713.7693	-769283.0501	-862484.6606	-859633.3365	-766767.3592	-919408.1191	-1083174.414	-1094995.526	-1044342.455	-880230.803	-924560.8775	-1100908.069	-1109085.824	-1058684.814	-891856.1955	-885690.6606	-1074754.95	-1090368.171	-1050862.69	-891625.2841	-736404.5915	-819563.6992	-898533.3589	-883585.2899	-763387.0136	-952111.4677	-1117498.588	-1132399.147	-1085483.756	-923194.8726	-952931.5109	-1130387.638	-1141656.659	-1095128.057	-930689.567	-910720.2398	-1100037.025	-1118114.201	-1081803.405	-924897.8576	-814095.4096	-869844.3494	-934582.0011	-907537.1828	-760006.668	-984814.7369	-1151822.7	-1169802.768	-1126625.039
16	-591703.8828	-827788.2245	-931986.1049	-988016.0683	-804167.1708	-664160.8192	-943101.0114	-1054381.374	-1124401.544	-1092183.647	-599107.3358	-866655.5731	-978806.1063	-1053941.419	-1032003.144	-548862.6	-788038.076	-888253.0062	-951647.0865	-924925.6645	-697857.3634	-884206.0209	-967786.3152	-1011178.041	-946669.5512	-725794.739	-994855.8815	-1097760.623	-1158409.344	-1114283.387	-664194.1414	-922074.2705	-1025612.547	-1091184.062	-1056335.577	-614135.62	-844975.6688	-937344.2309	-992016.6803	-952406.1858	-804010.8439	-940623.8171	-1003586.484	-1034339.952	-1089171.932	-787428.5893	-1046610.689	-1141139.887	-1192417.145
17	-623043.8521	-697865.3121	-839079.8603	-840342.3152	-748085.6272	-780780.2434	-976259.5966	-989452.5833	-947807.2459	-798201.4803	-768507.0875	-973729.026	-980447.1898	-938156.0266	-787374.5267	-750873.7784	-961320.5534	-970903.8447	-934548.7341	-789485.7343	-726626.9134	-857986.7784	-897878.7113	-872448.2543	-754183.2939	-830398.155	-1024675.919	-1040052.742	-1000697.679	-851152.601	-815365.1126	-1018875.44	-1027958.002	-988181.0489	-837783.6919	-793009.5543	-1001302.55	-1012956.464	-978820.7276	-834090.2352	-830209.9694	-1018108.245	-956677.5051	-904554.1309	-760280.9613	-880015.9936	-1073092.189	-1090652.9	-1053588.112
18	-613988.434	-779329.527	-818385.3565	-807330.4691	-712840.207	-907516.7239	-1050135.917	-1030645.355	-959072.7248	-774796.7926	-923278.6744	-1089623.423	-1063883.6	-990363.7664	-800950.8144	-896237.348	-1095453.708	-1080754.082	-1019890.222	-838534.7637	-688895.5363	-833943.4509	-865232.9678	-839172.1192	-713406.9689	-941326.1121	-1088674.501	-1075415.082	-1009891.523	-829688.345	-951154.0531	-1121186.968	-1101868.627	-1034627.924	-850203.8287	-918927.5393	-1120000.534	-1110805.251	-1055281.717	-878919.5503	-763802.6361	-888557.3782	-912080.5174	-871013.7067	-713973.7321	-975135.4377	-1127213.035	-1120184.796	-1060710.334
19	-594105.5369	-779616.363	-825989.2374	-863181.3198	-778072.8344	-719582.1535	-935272.9458	-979866.4808	-972976.0358	-848345.7513	-692076.585	-909925.0969	-950019.3264	-945456.643	-822350.9539	-669568.9612	-882696.1181	-918274.4932	-916426.1104	-798592.454	-691839.6818	-838627.3236	-869156.3838	-886911.7126	-782606.2507	-775161.2577	-987462.62	-1030702.03	-1022736.617	-895641.6481	-746730.7995	-960933.6672	-999782.8993	-994157.793	-868559.2415	-720742.8726	-930259.8015	-964748.5231	-961776.6487	-841323.517	-789573.8313	-897638.282	-912323.4689	-910642.0406	-787139.6717	-830740.2994	-1039652.232	-1081537.589	-1072497.189
20	-634045.2073	-794042.9224	-825726.6248	-808303.0683	-711209.26	-993266.5154	-1118014.301	-1081863.265	-994461.0724	-794673.9789	-1022432.954	-1176318.489	-1133198.804	-1043057.04	-836490.4885	-987025.1963	-1182863.277	-1154160.446	-1079647.582	-882261.5997	-700271.4099	-844309.5306	-870298.4149	-838825.4399	-708006.9073	-1017138.483	-1148580.104	-1120562.981	-1041014.151	-847022.3185	-1038993.022	-1198339.427	-1163584.483	-1081560.681	-881936.4054	-998577.1121	-1197586.916	-1176086.766	-1108510.943	-918089.3653	-766497.6093	-894576.1429	-914870.1435	-869347.7491	-704804.5561	-1041010.388	-1179145.863	-1159262.679	-1087567.247
21	-541980.1541	-777230.7478	-818506.7634	-809102.0892	-716034.093	-851623.3944	-990686.7536	-976825.7534	-917807.8427	-749098.7083	-858626.9512	-1008592.248	-987600.4596	-927662.1242	-755442.3142	-845000.2924	-1014301.108	-999717.4256	-949249.2484	-783727.6446	-747708.125	-852330.6095	-869785.8125	-842781.489	-720169.4633	-893926.2909	-1037277.621	-1028451.502	-973790.016	-807285.0689	-896183.3867	-1049926.372	-1034264.308	-978904.3723	-809505.1072	-876746.8505	-1048690.072	-1038924.966	-992433.3435	-829703.8105	-953436.096	-927430.4712	-921064.7978	-876460.8262	-724304.8329	-936229.1465	-1083868.425	-1080077.262	-1029772.189
22	-584969.7422	-771218.1423	-843380.368	-855949.9896	-770058.171	-706911.0275	-919780.2955	-963832.1223	-957184.9148	-835718.0128	-679709.2586	-895193.5131	-936199.5172	-930569.4697	-810097.9187	-659571.4644	-871528.9118	-910212.4271	-905403.0552	-788752.1373	-682275.7271	-831428.1746	-886501.5439	-880304.1707	-773558.2289	-763580.2753	-973354.0864	-1016143.321	-1008349.018	-884101.6336	-735494.039	-947607.5187	-987375.4944	-980685.9984	-857429.1526	-711848.9182	-920431.8727	-957943.3696	-952085.7972	-832579.7023	-779581.7141	-891638.2069	-929622.6616	-904658.2894	-777058.2868	-820249.4521	-1026927.815	-1068454.528	-1059513.122
23	-612471.0974	-832612.8208	-923826.6254	-823538.8249	-874915.8283	-731142.6694	-987016.28	-1081636.048	-1121446.813	-1021748.882	-686049.9619	-937024.3779	-1031436.941	-1076495.328	-978409.5851	-641421.1543	-874750.0323	-960325.612	-997707.6397	-902449.2544	-711423.9215	-888126.6821	-974078.5552	-983012.4712	-891395.5627	-785380.6601	-1033864.057	-1122197.786	-1155795.843	-1050819.834	-741584.2224	-985118.8854	-1073052.498	-1111800.662	-1008052.467	-696004.8863	-922606.9225	-1002159.268	-1033817.197	-932694.2326	-810376.7532	-943640.5511	-1024330.43	-1142486.055	-907875.297	-839618.5808	-1080711.756	-1162759.523	-1190144.857
24	-600806.9851	-855732.1697	-952407.2559	-989084.6158	-921254.4549	-701698.3705	-992079.0235	-1104814.504	-1162550.415	-1107686.398	-634283.8333	-903020.3283	-1017979.898	-1081296.847	-1032059.768	-572452.615	-799672.4586	-901481.7276	-952425.9138	-899118.5804	-708044.164	-902777.0694	-975974.7082	-989281.4363	-909461.0389	-758736.5811	-1037632.711	-1141116.375	-1189772.814	-1124264.618	-696055.5925	-953868.6429	-1059388.13	-1113524.67	-1052454.579	-636282.2243	-854618.7362	-948130.0916	-991103.9472	-925855.6594	-815281.347	-949821.9612	-999542.0902	-989478.1706	-897667.6386	-815774.7292	-1083186.352	-1177418.23	-1216995.228
25	-597419.7679	-842383.4715	-941276.5093	-981961.3741	-875078.4302	-683435.2249	-968496.0336	-1081270.009	-1142906.444	-1088839.103	-616474.0318	-885553.7628	-999556.0784	-1064939.531	-1014805.254	-559748.4886	-794184.6184	-895063.3644	-946252.7927	-888202.3358	-704041.7242	-894424.0488	-971748.7446	-986848.4081	-866285.7692	-742747.4249	-1017093.225	-1120987.225	-1173490.962	-1108817.801	-679888.5346	-938626.7775	-1043549.652	-1099752.964	-1038183.813	-624309.3603	-850076.0359	-942838.5465	-985958.6661	-916579.3321	-810663.6733	-946464.6261	-1002220.924	-991735.394	-857493.1154	-802059.5624	-1065690.353	-1160704.442	-1204075.45
26	-583577.4275	-769834.7877	-841892.318	-854508.1805	-768664.368	-703061.0492	-915951.3922	-960076.371	-953373.6156	-831874.5472	-675576.247	-891070.688	-932140.3736	-926459.8423	-805966.9579	-656162.1239	-868138.3475	-906884.0211	-902024.7563	-785346.2962	-681215.7368	-830365.6619	-885364.3029	-879212.0699	-772495.2992	-760187.1256	-969982.4947	-1012843.028	-1004993.899	-880714.5778	-731829.5561	-943953.6231	-983783.5606	-977044.4447	-853766.5861	-708842.6875	-917444.5624	-955016.2263	-949109.9564	-829576.7501	-778854.0482	-890896.5361	-928836.2294	-903915.8968	-776326.2304	-817313.1312	-1024013.535	-1065609.693	-1056614.183
27	-588689.7925	-798621.372	-882881.0213	-817433.1283	-827588.5299	-681143.7938	-924170.0976	-1004218.548	-1029283.117	-922607.5481	-638359.139	-878651.2797	-957524.241	-986605.7209	-881474.662	-609192.5199	-836228.7343	-908229.3644	-932225.5764	-830155.2553	-690821.3101	-859116.1453	-934848.2666	-939679.4978	-843783.7745	-741179.4693	-978127.2458	-1053397.119	-1073797.786	-962606.3764	-699157.3159	-933251.8042	-1007220.91	-1031598.864	-921684.049	-667538.1254	-888868.7788	-956299.7251	-976007.3449	-868992.5847	-792952.8329	-919610.924	-986815.4546	-1061925.805	-859979.019	-801215.0771	-1032084.321	-1102575.691	-1118312.444
28	-560366.4901	-773738.2531	-853193.9276	-876238.4331	-798490.1646	-619666.2592	-863390.6471	-935989.1141	-953354.3369	-857287.577	-570435.2668	-807022.7572	-878431.9136	-898715.6559	-805699.8188	-549966.4059	-768323.0759	-833130.9364	-849075.8794	-756649.6132	-668920.4832	-835887.1523	-896412.4723	-898860.7454	-803316.6611	-686589.9081	-923940.5529	-992103.1944	-1005227.373	-903302.21	-638935.9461	-869200.4683	-936117.8852	-952177.4349	-852836.1952	-615693.8772	-828519.474	-889317.5088	-901526.8494	-802692.8129	-777474.4779	-898036.0484	-939630.9516	-921482.9859	-808143.1637	-753513.4945	-984490.4024	-1048217.269	-1057100.415
29	-545441.7677	-802594.6412	-831687.9334	-811638.3023	-714555.003	-979798.3803	-1085306.818	-1044189.165	-962516.3579	-773076.9594	-1006828.878	-1127146.398	-1077215.005	-993666.9915	-798511.9488	-984278.7048	-1134078.187	-1094508.271	-1024312.659	-837252.3108	-794512.0635	-879139.1505	-880891.6755	-843785.6829	-713556.7464	-1008154.431	-1121265.176	-1088046.378	-1013194.534	-828198.4654	-1028509.084	-1155814.253	-1114195.978	-1037749.021	-847931.6775	-1000184.494	-1155331.39	-1123308.192	-1059330.496	-877596.2019	-1043582.359	-955683.6599	-930095.353	-875933.0008	-712558.4888	-1036510.45	-1157223.472	-1131903.606	-1063872.71
30	-563778.9867	-777629.5871	-860248.1317	-886848.5073	-792082.0181	-621266.5644	-868268.3473	-945842.1226	-970015.6327	-879409.9878	-570001.497	-810720.0538	-887060.9517	-913625.0805	-825597.2421	-546809.0447	-769631.4385	-838574.6595	-858956.925	-769146.528	-671882.9434	-840246.6824	-904265.0845	-908892.0423	-796257.5673	-688031.5386	-928387.8182	-1001104.648	-1020414.654	-923377.4343	-638438.4818	-872537.7217	-943944.1803	-965672.0996	-870824.6002	-612643.7144	-829620.9087	-894109.5514	-910186.946	-813571.3017	-779986.8968	-902863.7777	-948281.9782	-930935.5216	-800433.1199	-754796.4503	-988507.2266	-1056367.173	-1070813.662
31	-629325.7452	-791150.8231	-844317.8595	-845376.8586	-756153.4513	-851701.3013	-1024836.457	-1044925.193	-1007620.788	-854028.2673	-852252.1072	-1040416.161	-1054796.332	-1016879.324	-861160.8695	-823121.6951	-1025705.932	-1042780.783	-1011543.771	-862066.7905	-710518.6954	-843033.4433	-883599.7729	-869240.0721	-753973.8002	-891270.4001	-1065223.785	-1087478.637	-1052590.583	-899803.2252	-888005.1688	-1076329.939	-1092990.422	-1057649.654	-903249.7661	-855328.4456	-1057143.38	-1076044.259	-1046870.143	-898686.8952	-791711.6527	-894916.0601	-922881.6221	-893103.2213	-751794.1506	-930839.4365	-1105611.05	-1130032.081	-1097560.377
32	-546385.2698	-809507.858	-835280.6109	-812329.5759	-714151.8603	-1014733.927	-1111096.589	-1062549.827	-974702.1709	-779612.5037	-1047222.995	-1159459.677	-1101640.466	-1011657.367	-810251.0662	-1022240.616	-1166724.789	-1120344.591	-1044772.043	-851841.0658	-807269.0078	-886446.1225	-883918.7044	-844059.3873	-711754.3754	-1039288.606	-1144156.937	-1104289.637	-1023934.682	-833898.6489	-1064575.954	-1184675.196	-1135982.261	-1053787.798	-858405.2751	-1033828.824	-1184397.691	-1146307.798	-1077564.074	-890649.8165	-1068152.746	-963384.387	-932556.7333	-875789.1361	-709356.8895	-1063843.257	-1177217.222	-1146029.463	-1073167.193
33	-590216.5741	-776431.2088	-848987.9713	-861383.3373	-775310.6116	-721419.3777	-934209.2259	-977985.3853	-971547.5058	-850201.82	-695284.1984	-910730.0656	-951496.0908	-946056.2879	-825665.1302	-672419.3049	-884305.9953	-922755.2719	-918133.9176	-801586.79	-686270.2197	-835432.173	-890787.1503	-884419.6694	-777563.7987	-776367.1017	-986059.6729	-1028580.225	-1020992.529	-896865.4955	-749303.364	-961376.9464	-1000911.423	-994408.9162	-871231.2557	-723177.6697	-931689.3244	-968974.0861	-963300.0267	-843896.0992	-782323.8677	-894433.1371	-932586.2714	-907455.9391	-779816.9857	-831314.7538	-1037910.057	-1079175.074	-1070437.553
34	-593533.2146	-831194.9637	-936534.9404	-993895.9436	-806870.4061	-667263.9028	-948284.7065	-1061622.165	-1134149.421	-1104812.349	-601332.7003	-870527.9091	-984871.2876	-1062638.376	-1043864.166	-549289.4425	-789310.3228	-891413.586	-957038.5286	-933214.25	-699583.1578	-887119.8314	-971695.0397	-1016614.348	-953417.7327	-728526.1789	-999451.2441	-1104188.607	-1167081.544	-1125545.337	-666172.4831	-925498.4826	-1030996.652	-1098927.989	-1066920.61	-614508.9893	-846036.2174	-940082.7735	-996740.2194	-959706.6837	-805633.101	-943044.6991	-1006855.098	-1039332.689	-1099965.059	-789788.3854	-1050617.719	-1146755.063	-1200013.667
35	-586151.4101	-794900.1	-872075.2751	-898204.6752	-815564.2069	-694288.7761	-932761.3832	-1000633.045	-1010620.294	-914236.4678	-653242.3498	-886523.1869	-952627.9138	-965562.7298	-871535.289	-621588.4629	-839143.4722	-898966.9056	-908709.9441	-816200.2076	-687602.2177	-851595.3028	-910881.6964	-915185.2747	-814610.4749	-752367.9978	-985011.2778	-1048958.543	-1055327.231	-953542.9952	-712298.8064	-939741.6381	-1001882.827	-1011226.687	-911408.7688	-678763.98	-891134.5954	-947418.4754	-953987.5332	-855581.3214	-789053.0227	-908290.5055	-949688.05	-932165.8219	-813656.7378	-810447.157	-1037261.11	-1097284.052	-1100034.169
36	-592936.0631	-783073.5399	-776408.1479	-860811.4922	-775211.0898	-700259.2997	-922687.5891	-978055.6521	-960499.183	-829248.7711	-670932.2791	-896492.6874	-950020.3637	-932146.7584	-801262.0547	-652777.3427	-874420.3783	-924122.0618	-908454.0215	-782018.0381	-692905.6407	-853446.9933	-905728.6964	-898846.5509	-783510.3953	-758434.4742	-976990.2624	-1030206.482	-1012365.351	-879125.6681	-728212.1888	-949565.8803	-1000912.853	-982904.5779	-850092.4816	-706090.2243	-923510.9536	-971158.331	-955310.1312	-826871.8639	-792875.214	-923820.4467	-1035049.178	-936881.5427	-791809.705	-816609.5862	-1031292.873	-1082357.312	-1064231.51
37	-560633.7615	-769926.7698	-854726.8183	-888149.8559	-758254.3151	-611456.7761	-855059.007	-931400.8067	-958839.6018	-877692.581	-561310.8319	-800886.2303	-875792.5811	-906228.7205	-830550.693	-541612.9308	-766429.7149	-834572.4228	-860076.6231	-784148.93	-668545.7629	-834716.6671	-901398.9361	-918845.5868	-832055.6706	-679402.8429	-916806.3584	-988585.1157	-1011117.146	-923005.8138	-630593.1741	-863916.0475	-934166.7006	-959658.0371	-876555.0313	-607794.1627	-826962.8777	-890831.7006	-911790.1562	-828411.5374	-776457.7644	-899506.5645	-948071.001	-949541.2552	-905857.0261	-747348.8441	-978553.6474	-1045769.431	-1063394.691
38	-644221.1663	-828840.7999	-856800.4214	-913210.8409	-827294.5769	-847611.5461	-1065023.465	-1107839.911	-1102439.738	-976140.1723	-828483.1825	-1048001.795	-1085390.036	-1083261.201	-958599.2555	-781920.1815	-995454.6902	-1026535.943	-1028689.854	-910705.2634	-732179.0537	-877062.4032	-889307.3863	-925753.5006	-822603.0225	-888345.3368	-1102106.807	-1143548.968	-1137112.236	-1008605.557	-867901.3973	-1083531.86	-1119721.709	-1116501.612	-989582.0247	-819875.8238	-1029598.214	-1059719.543	-1060650.429	-940230.6988	-820136.9497	-925284.0022	-921814.2909	-938296.0936	-817911.4767	-929079.065	-1139190.086	-1179258.043	-1171784.716
39	-582995.461	-819618.9464	-908709.9522	-939382.8872	-867184.4165	-665568.3249	-935399.7934	-1030457.415	-1070412.547	-997401.283	-606162.5088	-860739.3658	-956517.6856	-1000881.182	-932362.2817	-562548.8377	-785865.0043	-871377.453	-906906.6482	-836369.8567	-690812.6147	-873316.219	-940932.4892	-949456.7428	-862711.0387	-726960.4565	-987558.3829	-1075485.332	-1108492.019	-1026944.413	-670897.939	-916577.5752	-1005095.25	-1042461.243	-964535.0898	-627214.3372	-843123.6336	-922226.8048	-951650.804	-871610.0817	-798629.7713	-927013.4858	-973154.9579	-959530.5186	-858237.6725	-788352.5257	-1039716.921	-1120513.238	-1146571.502
40	-585159.9093	-824007.409	-914020.0288	-945422.6188	-873754.9831	-669958.8317	-942287.4278	-1039493.255	-1081609.099	-1010803.08	-609579.7994	-865877.3292	-963986.5458	-1010653.257	-944477.4751	-563752.3402	-787542.8799	-875035.7108	-912438.1288	-843995.0532	-692906.5848	-876896.2882	-945190.8038	-954296.2215	-868392.0776	-730821.8768	-993643.3926	-1083460.787	-1118369.225	-1038770.72	-673955.0857	-921109.1689	-1011692.896	-1051096.838	-975219.0264	-628316.2628	-844520.5133	-925374.5605	-956445.1322	-878201.9798	-800653.2633	-929785.1614	-976361.5103	-963169.7437	-863029.1842	-791684.8595	-1044999.307	-1127428.307	-1155129.362
41	-609828.903	-826469.3147	-908110.8263	-901895.009	-859616.9434	-738480.3807	-990204.3943	-1072094.54	-1092406.187	-1008194.953	-694477.1771	-939550.1927	-1019513.17	-1040909.134	-961865.3448	-648594.7477	-874149.521	-944264.7775	-957220.9055	-881124.0129	-708779.0509	-879809.5586	-940638.642	-913600.8991	-853925.362	-791595.9357	-1036170.474	-1112651.721	-1128156.164	-1037445.858	-749016.9873	-986980.0752	-1061485.648	-1078203.913	-992049.0381	-702516.0738	-921792.9914	-987031.5736	-995972.8025	-912567.0665	-807729.1987	-933149.8023	-973166.3951	-925306.7196	-848233.7807	-844711.4281	-1082136.477	-1153208.915	-1163906.114
42	-568662.51	-787029.6989	-872010.7589	-900655.7342	-804130.3385	-630291.3876	-882818.076	-965501.7504	-995113.632	-909812.1344	-576747.7644	-821583.4211	-903391.505	-935590.9094	-853063.9566	-548687.4218	-773195.7442	-846774.9419	-871629.3835	-786429.4741	-676551.3295	-848111.4353	-914061.469	-920208.7155	-806423.3347	-695974.4667	-941264.8949	-1018507.613	-1042636.246	-950297.212	-644455.6518	-882131.656	-958403.5841	-985136.1846	-895119.5952	-614337.1785	-832590.3133	-901183.3818	-921186.4813	-828524.644	-784440.1451	-909193.1717	-956112.1204	-939761.6422	-808716.3347	-761657.4833	-999711.6512	-1071513.476	-1090158.844
43	-540664.8076	-767592.9567	-813498.1725	-808138.3771	-716596.1188	-802919.3675	-954732.951	-951228.9539	-900819.4677	-739987.4345	-802313.0722	-963543.9529	-953548.6576	-902581.5454	-739076.6823	-792077.1772	-968788.1235	-963698.7294	-920726.5975	-763389.302	-729923.5296	-842143.88	-865565.7984	-842399.9147	-722682.1684	-850521.797	-1005363.966	-1005806.597	-958817.0579	-799338.3808	-845902.1695	-1009691.015	-1003891.812	-956544.5387	-794903.7504	-829842.9224	-1008168.425	-1006860.965	-967013.7134	-811505.6239	-919182.2516	-916694.8034	-917633.3607	-876661.3897	-728768.2175	-898124.1819	-1055994.919	-1060384.249	-1016814.648
44	-596853.2911	-810289.7453	-896936.5738	-819529.0539	-843834.7508	-698307.0971	-945743.5445	-1030793.946	-1060920.498	-956640.1691	-654730.1483	-898689.2341	-982896.5332	-1017462.467	-914749.8799	-620255.7652	-849452.0861	-926112.6405	-954703.8521	-854971.89	-697893.6465	-869074.7021	-948314.9962	-954554.5716	-860127.6532	-756352.5794	-997260.2318	-1077014.585	-1101945.569	-992887.744	-713721.3607	-951056.4135	-1029819.168	-1059130.039	-951332.0629	-677310.0182	-900450.1991	-972042.1039	-995851.9517	-890859.6905	-798934.008	-927859.665	-999693.3622	-1089580.027	-876420.5556	-814397.9932	-1048776.844	-1123235.223	-1142970.628
45	-620977.3931	-844615.5955	-927715.9553	-961820.2204	-880189.5553	-779918.6525	-1035068.284	-1117146.458	-1139661.198	-1060906.434	-736494.0147	-981475.934	-1062877.41	-1089512.168	-1013762.908	-679418.5083	-900273.2251	-972772.3766	-993506.6249	-917880.4562	-717088.326	-891108.2792	-955050.2332	-965301.6359	-868157.6105	-827778.3291	-1075251.084	-1151662.816	-1168881.804	-1082961.785	-786295.0373	-1023772.457	-1099422.297	-1120745.124	-1037179.626	-730029.7193	-944481.207	-1011899.72	-1028003.347	-944428.0014	-813199.2546	-937600.963	-982384.4399	-968783.006	-856125.6572	-875637.9432	-1115433.823	-1186179.191	-1198102.41
46	-656562.3757	-689180.9081	-857911.9163	-854268.6124	-758948.3317	-861601.9143	-1050224.347	-1050758.053	-996659.4825	-836869.4218	-858857.3036	-1060063.703	-1052957.832	-997515.804	-835581.192	-832221.5447	-1041839.707	-1039578.977	-991996.6709	-836582.6285	-757947.4992	-882622.7723	-917808.8064	-884494.5442	-761478.4789	-902276.9383	-1090406.35	-1094450.897	-1043930.778	-885271.2011	-895903.3592	-1096019.212	-1092661.815	-1041071.693	-880713.7367	-864985.8498	-1072909.248	-1073971.079	-1029825.695	-875942.0509	-859332.6155	-1076064.636	-977705.6413	-914720.4134	-764008.6269	-942951.8853	-1130588.305	-1138143.74	-1091202.074
47	-622702.8781	-758126.1	-804892.6443	-803153.1347	-712298.4505	-823777.0151	-985909.2936	-987396.5685	-932992.886	-762525.979	-831841.2533	-1014767.908	-1009907.222	-953494.0502	-779492.2365	-816544.7498	-1023985.903	-1025177.831	-978008.1262	-811379.6412	-701800.0196	-815756.3971	-852432.7951	-835515.2927	-715824.4286	-866398.0419	-1031178.368	-1036778.207	-986720.5397	-818942.7825	-869373.8965	-1054097.219	-1053507.969	-1001641.562	-831128.6506	-848789.2919	-1056564.952	-1061310.779	-1017900.357	-854767.3364	-780897.1638	-873386.6929	-899972.8833	-867877.3881	-719350.4073	-909019.0061	-1076447.357	-1086159.846	-1040448.199
48	-607588.9613	-857370.7851	-971486.106	-1039074.209	-827640.826	-691106.5736	-988113.8431	-1117257.084	-1209047.639	-1201845.51	-618431.3809	-900281.1632	-1031473.359	-1129461.812	-1134998.815	-552569.1051	-799085.6837	-915698.0319	-998463.8973	-996899.9398	-712843.3708	-909508.2157	-1001727.886	-1058384.432	-1005267.664	-749513.3109	-1034759.903	-1153578.284	-1233714.751	-1212076.995	-681373.1538	-951808.5584	-1072365.645	-1158428.769	-1148251.152	-617377.7878	-854184.9859	-961124.4789	-1033033.727	-1015800.361	-818097.7804	-961645.6463	-1031969.63	-1077694.593	-1182894.502	-807919.9768	-1081405.901	-1189899.503	-1258381.863
49	-543532.1647	-788602.6212	-824416.5263	-810239.1975	-715370.9447	-909090.507	-1033109.554	-1007028.064	-937852.8559	-759849.3305	-925073.1207	-1061745.87	-1027779.042	-957255.3332	-774752.537	-907445.614	-1068003.028	-1042216.796	-982903.8452	-807725.3693	-768692.6189	-864350.1891	-874765.1138	-843231.7182	-717204.659	-945140.3505	-1074933.348	-1055170.798	-991456.9878	-816661.567	-955511.466	-1097401.086	-1070101.583	-1005287.305	-826733.6173	-932089.981	-1096502.589	-1076758.092	-1022426.608	-851176.311	-993853.073	-940097.757	-925113.6372	-876224.1763	-719038.3725	-981190.1575	-1116757.079	-1103313.545	-1045061.12
50	-680398.1378	-683005.2368	-871303.8071	-864171.9098	-766673.0407	-919075.9884	-1102822.314	-1094353.726	-1031399.386	-864367.0486	-923107.3367	-1121458.197	-1104521.751	-1039727.852	-869862.0157	-890069.7369	-1099098.654	-1088415.38	-1032849.167	-870074.2695	-780220.2591	-900141.9714	-931981.537	-893060.9268	-766666.2459	-953391.5277	-1137148.711	-1133134.625	-1074674.79	-909533.6908	-953175.8841	-1150877.852	-1138674.124	-1078683.397	-911242.2391	-916169.7823	-1123830.352	-1117359.919	-1066096.454	-905703.8008	-880042.3719	-1117278.706	-992659.2131	-921949.8813	-766659.4521	-987706.9872	-1171475.063	-1171915.525	-1117950.193
51	-635708.7341	-828444.6387	-767069.817	-902633.7899	-815971.4635	-797616.5314	-1026456.705	-1088135.661	-1064097.757	-926566.1896	-774253.4706	-1006891.973	-1067861.083	-1042398.504	-904485.858	-738332.7792	-966541.031	-1022628.084	-1000365.379	-867524.3438	-728798.3946	-897712.624	-949942.2392	-941362.3175	-818986.9053	-844762.1969	-1069150.349	-1128078.139	-1104365.376	-965415.4719	-820185.3849	-1047996.88	-1106143.447	-1081197.702	-941974.8201	-781699.1286	-1005062.941	-1058505.098	-1036663.56	-902430.8219	-821888.0475	-966980.6092	-1132814.591	-980090.775	-822002.3546	-891907.7999	-1111843.932	-1168020.616	-1144632.98
52	-631753.8569	-817701.1836	-893381.3519	-904397.1995	-816892.2969	-836276.7733	-1048437.884	-1090031.683	-1085250.978	-964864.9178	-818585.4	-1033727.37	-1072593.568	-1068659.863	-948905.1501	-774131.0416	-985457.5744	-1022052.467	-1018919.581	-903194.1239	-717893.1825	-867130.3893	-924714.7558	-917000.5943	-809274.4553	-877595.812	-1086645.236	-1127038.724	-1121086.663	-997912.4046	-858626.8279	-1070384.558	-1108070.509	-1103048.326	-980497.5463	-812863.3244	-1020810.525	-1056300.305	-1052079.052	-933483.9475	-804032.5122	-916559.5949	-956048.1054	-929603.9266	-801656.6137	-918914.7718	-1124852.526	-1164045.781	-1156922.347
53	-670299.5328	-685621.7113	-865630.0042	-859976.1351	-763400.2784	-894725.6879	-1080537.896	-1075883.35	-1016680.974	-852717.0049	-895886.2351	-1095446.915	-1082675.433	-1021843.683	-855338.1044	-865560.9321	-1074839.497	-1067724.641	-1015541.005	-855884.7148	-770783.8584	-892719.5332	-925976.9122	-889431.5688	-764468.3212	-931735.5788	-1117345.164	-1116745.315	-1061649.335	-899254.2922	-928910.9749	-1127635.644	-1119179.881	-1062748.276	-898308.0907	-894484.4545	-1102256.378	-1098977.173	-1050729.458	-893094.5058	-871268.1759	-1099817.355	-986323.7658	-918886.94	-765536.365	-968745.3911	-1154152.385	-1157607.28	-1106617.696
54	-582015.5461	-817632.1492	-906305.9109	-936648.5078	-864209.711	-663580.6022	-932281.5412	-1026366.601	-1065343.51	-991333.8613	-604615.3921	-858413.2456	-953136.294	-996457.0514	-926877.3466	-562003.9737	-785105.3764	-869721.2428	-904402.3702	-832917.6866	-689864.6075	-871695.4073	-939004.6141	-947265.7561	-860139.0509	-725212.2682	-984803.5046	-1071874.589	-1104020.293	-1021590.266	-669513.8711	-914525.978	-1002108.285	-1038551.633	-959698.1305	-626715.4604	-842491.2216	-920801.7153	-949480.2585	-868625.7189	-797713.6719	-925758.6597	-971703.2492	-957882.9251	-856068.4021	-786843.8717	-1037325.417	-1117382.566	-1142697.086
55	-617677.1335	-782535.6809	-837563.7852	-840239.9177	-751639.0397	-816777.5126	-994876.7882	-1018228.987	-984434.3056	-834635.81	-812663.9717	-1004222.029	-1022149.773	-987964.8382	-836471.3077	-787864.5296	-991681.3856	-1011682.074	-983461.613	-837885.1407	-702327.7272	-836870.4533	-878881.4547	-865723.586	-751631.7766	-860480.7375	-1038920.708	-1064010.507	-1032198.637	-882766.8475	-852962.6749	-1044250.392	-1064019.543	-1031969.088	-881292.5567	-824329.8237	-1027058.71	-1048509.081	-1021975.531	-877186.1936	-786978.3271	-891205.2226	-920199.0603	-891207.1903	-751624.5148	-904183.8999	-1082964.566	-1109792.027	-1079962.969
56	-573665.7726	-794196.1029	-887132.3527	-930037.6097	-777511.9434	-633562.8912	-891987.2304	-982983.6153	-1028282.687	-967658.4337	-577164.1482	-828472.4376	-919000.4397	-968185.1419	-915047.6462	-544653.7226	-775493.0977	-857088.1367	-898484.8188	-843196.1399	-680840.1823	-855474.4171	-929244.3718	-957573.3911	-880129.1671	-698861.3993	-949543.3485	-1034377.548	-1072897.194	-1003235.03	-644686.72	-888309.8567	-972522.6271	-1014825.141	-951961.9488	-610454.0152	-834518.1393	-910340.8556	-945440.2648	-880419.6909	-788014.5921	-916752.7313	-971356.3427	-985109.1099	-982746.3909	-764159.8401	-1007099.404	-1085771.491	-1117511.7
57	-637583.2113	-830432.9899	-766660.5723	-904466.6178	-817757.7535	-801883.1322	-1031004.301	-1092959.827	-1068637.879	-930831.0456	-778781.4371	-1011730.131	-1073025.356	-1047230.196	-909009.5565	-742082.176	-970578.143	-1026945.03	-1004393.319	-871271.5875	-730371.3651	-899652.5289	-951879.8615	-943225.5361	-820541.6343	-848545.4385	-1073189.19	-1132367.284	-1108397.202	-969197.0518	-824216.0348	-1052310.538	-1110755.091	-1085505.318	-946001.4883	-785012.6269	-1008636.89	-1062332.999	-1040228.808	-905742.1313	-823159.5112	-968872.0679	-1137099.08	-981984.3842	-823325.5228	-895207.6824	-1115374.016	-1171774.74	-1148156.509
58	-543309.2163	-786969.036	-823567.5808	-810075.8503	-715466.2068	-900835.2774	-1027015.461	-1002689.461	-934973.3622	-758304.9889	-915528.0372	-1054110.279	-1022007.333	-953004.2281	-771978.597	-898475.2578	-1060288.674	-1036111.703	-978069.3162	-804278.0632	-765678.1675	-862623.56	-874049.8304	-843167.0422	-717630.5572	-937783.3805	-1069524.051	-1051332.535	-988919.103	-815314.6202	-946988.906	-1090581.278	-1064953.51	-1001497.361	-824258.7182	-924139.8643	-1089634.255	-1071323.312	-1018118.034	-848091.7569	-988047.1187	-938278.084	-924532.0159	-876258.1714	-719794.9068	-974731.4465	-1112032.579	-1099975.621	-1042864.844
59	-566991.556	-781766.8021	-870536.1763	-908585.2077	-767649.3381	-622241.4613	-873074.8032	-956565.9861	-992718.0924	-921583.3052	-569045.0279	-814344.4323	-896871.959	-936454.7687	-871773.3609	-543096.4109	-770851.3751	-845556.9348	-878814.4383	-812955.6908	-674543.7161	-844843.5392	-914983.6052	-937739.3262	-855508.7977	-688895.8906	-932777.4204	-1010925.403	-1041257.149	-962146.4242	-637468.8488	-875816.8067	-952879.0158	-986571.8504	-913343.0361	-609091.7978	-830648.7862	-900349.4333	-928206.6919	-853784.2255	-782095.8762	-907920.2762	-959430.9835	-966893.3822	-943368.2574	-755550.2535	-992479.975	-1065284.828	-1089796.205
60	-610256.9528	-777047.8242	-833261.4311	-836967.6798	-748763.3537	-794531.0142	-975792.4404	-1001223.469	-969664.4865	-822282.7897	-787446.2784	-981166.32	-1001353.872	-969546.2735	-820744.0251	-765405.6697	-970007.7059	-991872.1567	-965573.2424	-822481.3986	-697110.07	-832944.6207	-875875.88	-863483.5799	-750139.9046	-840867.6827	-1022165.614	-1049061.278	-1019208.942	-871914.6529	-830640.5612	-1023815.679	-1045565.056	-1015610.534	-867305.786	-804583.6616	-1007894.736	-1030969.137	-1006117.632	-863490.219	-783963.1927	-888841.4143	-918490.265	-889999.4161	-751516.4566	-887204.2887	-1068538.726	-1096899.087	-1068753.397
61	-619137.4	-841988.931	-924776.2402	-958459.1619	-876775.1449	-775394.4906	-1029663.009	-1110990.598	-1132843.461	-1053157.285	-732095.503	-976459.2083	-1057052.497	-1082963.433	-1006248.466	-676363.1204	-897043.5007	-968872.9444	-989026.484	-912508.2902	-715530.4593	-889020.6538	-952716.6363	-962653.7921	-865328.5055	-823794.1058	-1070483.362	-1146236.547	-1162882.271	-1076124.083	-782385.5265	-1019332.779	-1094268.905	-1114958.836	-1030534.659	-727321.1495	-941662.6965	-1008492.923	-1024092.802	-939733.8832	-811923.5146	-936052.3766	-980656.9615	-966848.3767	-853881.8578	-872193.6585	-1111303.652	-1181482.512	-1192921.081
62	-544915.991	-798742.1764	-829685.8751	-811253.0826	-714779.6587	-960330.1697	-1070935.189	-1033957.488	-955725.682	-769434.9567	-984318.8206	-1109139.475	-1063603.653	-983641.6605	-791970.1988	-963124.0197	-1115885.516	-1080110.702	-1012911.446	-829122.5695	-787403.1184	-875067.2615	-879204.8309	-843633.1581	-714561.1371	-990804.5752	-1108508.495	-1078994.646	-1007209.47	-825021.9766	-1008410.431	-1139731.181	-1102055.336	-1028811.24	-842095.1521	-981435.8279	-1139133.88	-1110491.414	-1049169.638	-870321.9342	-1029890.246	-951392.3465	-928723.7223	-876013.171	-714342.6146	-1021278.948	-1146081.739	-1124031.819	-1058693.258
63	-620423.5823	-841280.7004	-924786.176	-915699.6442	-879293.2796	-762563.3065	-1019629.066	-1106452.536	-1130828.725	-1052006.782	-717648.6923	-966819.4977	-1051921.039	-1077365.11	-1004240.439	-664461.0335	-891826.9599	-966033.1502	-981735.5914	-911466.9731	-717907.7014	-892019.464	-954037.2925	-923846.2525	-870623.367	-812848.2054	-1062193.451	-1143035.969	-1162087.943	-1076244.227	-769621.9097	-1011156.329	-1090217.482	-1110471.987	-1029627.906	-716554.9077	-937235.0493	-1006055.156	-1017320.519	-939116.2364	-815391.8204	-942758.2275	-983288.3464	-931992.7902	-861953.4543	-863133.0416	-1104757.758	-1179619.419	-1193347.129
64	-619133.0672	-783103.5649	-820268.4178	-807579.9442	-712421.8633	-929511.8484	-1067546.962	-1043782.93	-968149.961	-779895.3611	-948712.0973	-1111861.013	-1081663.195	-1003879.777	-810066.8664	-919524.7519	-1117874.572	-1099583.073	-1035218.196	-849750.8516	-691813.4881	-836602.387	-866532.2729	-839083.1947	-712021.834	-960772.2531	-1104040.5	-1086995.678	-1017874.587	-834134.5705	-973685.0589	-1140976.846	-1117698.962	-1046666.342	-858343.3467	-939357.9362	-1139901.715	-1127550.19	-1068935.202	-888966.7462	-764493.9063	-890101.2126	-912796.0664	-870586.3827	-711621.806	-992032.5952	-1140533.989	-1130208.411	-1067599.227
65	-643348.2076	-836548.2081	-765401.9312	-910103.5207	-823251.5279	-815005.1578	-1044990.535	-1107796.657	-1082601.127	-943947.7051	-792707.2985	-1026609.994	-1088908.192	-1062090.173	-922922.2917	-753613.5292	-982994.3708	-1040221.892	-1016781.337	-882796.3188	-735209.0708	-905618.7497	-957839.0617	-948955.9063	-825323.2377	-860180.8822	-1085610.732	-1145558.645	-1120797.171	-980827.3847	-836612.388	-1065577.289	-1124938.306	-1098753.485	-958385.5955	-795203.3642	-1019628.65	-1074105.792	-1051193.805	-915926.1368	-827069.9258	-974689.2913	-1150276.122	-987808.2212	-827394.9557	-905356.5441	-1126230.868	-1183320.632	-1158993.199
66	-604860.0734	-856705.038	-959197.4929	-1002997.413	-893434.6823	-697185.0194	-990663.3134	-1111222.489	-1181144.571	-1135158.378	-626752.3263	-902104.6763	-1024436.538	-1098405.631	-1056652.243	-562610.2954	-799615.0262	-907556.9275	-965559.9521	-914533.8166	-711154.2568	-906406.415	-986674.0534	-1004089.957	-881773.8523	-754848.8951	-1036712.131	-1147501.562	-1207346.73	-1149831.503	-689056.0107	-953243.6428	-1065579.317	-1129407.525	-1075198.52	-626889.4422	-854600.0806	-953615.9006	-1002717.039	-939361.5384	-817448.4322	-956107.792	-1014150.559	-1005182.455	-870113.0304	-812512.7083	-1082760.886	-1183780.635	-1233548.856
67	-631746.235	-695610.5885	-843969.2094	-843957.9867	-750905.901	-801763.898	-995462.9954	-1005369.265	-960490.7063	-808240.8017	-791964.6294	-996144.0172	-999273.0599	-953567.55	-799890.378	-771994.0227	-982225.6656	-988733.905	-949463.888	-801713.4568	-734758.6477	-864382.9984	-903053.1432	-875575.8212	-756077.336	-849059.9761	-1041741.449	-1054176.084	-1011922.248	-860010.7812	-836275.1821	-1038904.205	-1044756.992	-1001912.997	-848929.5792	-811696.6924	-1019893.73	-1028797.631	-992063.0995	-844956.1828	-837771.0547	-1033155.408	-962137.0204	-907193.5933	-761248.7716	-896355.9802	-1088019.851	-1102982.903	-1063353.789
68	-576898.5099	-800216.3846	-895170.9109	-940428.3394	-782289.0153	-639046.5623	-901147.6927	-995779.3126	-1045508.827	-989975.478	-581096.7421	-835315.5074	-929718.6363	-983554.1309	-936008.0684	-545408.0253	-777741.372	-862673.4134	-908012.4049	-857843.4661	-683889.9517	-860623.611	-936151.7461	-967180.2596	-892054.3401	-703688.3136	-957664.1281	-1045736.877	-1088222.431	-1023136.791	-648182.783	-894361.0161	-982037.2472	-1028509.964	-970667.485	-611113.8217	-836392.3072	-915180.3215	-953787.5537	-893320.8999	-790881.3935	-921030.8374	-977132.5343	-993932.1174	-1001819.665	-768329.9973	-1014180.501	-1095694.453	-1130936.035
69	-606520.4504	-773851.1087	-815651.8923	-806968.3293	-713447.4774	-875588.4558	-1024861.928	-1011574.764	-945896.1487	-767395.6768	-886359.3495	-1057343.189	-1038074.623	-970743.8357	-787717.8932	-862433.1986	-1062907.435	-1053421.793	-997640.0334	-822253.4163	-684659.8183	-830083.7218	-863346.8879	-839301.2025	-715417.6398	-913097.9652	-1066369.115	-1058604.613	-998303.2538	-823234.1748	-918447.8961	-1092459.85	-1078889.208	-1017152.877	-838388.4505	-889270.6402	-1091111.848	-1086498.186	-1035462.229	-864334.9742	-762799.1838	-886316.3379	-911041.8218	-871634.0131	-717387.8035	-950607.4121	-1107876.251	-1105634.45	-1050710.371
70	-621432.3929	-845421.5131	-939255.7896	-825839.5797	-892749.749	-749983.2965	-1010698.042	-1110808.589	-1156176.03	-1059107.42	-704020.8663	-959020.5882	-1059288.799	-1110367.621	-1014936.701	-653565.5811	-889265.6669	-979956.573	-1022382.657	-929691.1527	-719187.4185	-899058.4621	-988861.3524	-999341.2463	-909336.6851	-802036.5978	-1054866.858	-1148123.323	-1186694.434	-1084060.519	-757571.5725	-1004663.492	-1097859.224	-1142022.386	-1040597.903	-706731.7601	-935320.1641	-1019440.107	-1055601.165	-956698.3523	-816942.4526	-952695.4196	-1038466.861	-1172842.85	-925923.6212	-854089.8281	-1099035.595	-1185438.056	-1217212.821
71	-592226.8152	-763365.4785	-810420.0732	-806275.1979	-714609.786	-814478.1158	-976487.803	-975073.8719	-920676.3328	-753230.0259	-815696.184	-995559.1907	-988676.5357	-933191.5127	-762390.2332	-797732.4434	-1000614.24	-1001108.104	-955053.4275	-791091.1036	-676552.7023	-822696.2443	-859736.9527	-839548.2664	-719266.0411	-859069.6151	-1023676.861	-1026429.568	-976123.4399	-810880.9668	-855848.6857	-1037476.474	-1034906.863	-983705.8367	-815773.9518	-832507.6746	-1035819.234	-1039974.743	-997527.9547	-836420.2624	-760878.5876	-882027.0125	-909053.7703	-872821.2724	-723922.297	-903661.0518	-1070865.867	-1077785.254	-1031570.557
72	-614451.0891	-800509.7656	-874888.8482	-886479.3479	-799571.0328	-788431.784	-1000854.802	-1043357.685	-1037886.667	-917100.8653	-767223.0595	-982491.6208	-1022149.211	-1017588.126	-897568.2954	-731762.0072	-943321.8792	-980689.234	-976936.3114	-860868.5795	-704720.3232	-853926.1824	-910581.8746	-903428.6864	-796065.0662	-835427.9871	-1044745.321	-1086024.858	-1079391.457	-955820.3108	-813087.0529	-1024976.354	-1063432.327	-1057793.501	-934981.5874	-775503.8739	-983686.2033	-1019923.701	-1015097.267	-896165.2393	-794989.5607	-907342.5991	-946274.8454	-920377.9623	-792559.0997	-882424.114	-1088635.777	-1128692.045	-1120896.247
73	-564732.926	-782591.2896	-863906.1762	-888422.6465	-811745.2547	-628523.4197	-877285.3718	-954217.5073	-975941.6288	-884323.6061	-577329.1159	-817387.7945	-893499.1705	-918429.2886	-830140.3259	-552394.284	-771707.9274	-840510.8992	-860234.7759	-772032.2541	-673144.7402	-843109.3817	-905002.9558	-908623.6365	-814777.2681	-694379.7193	-936216.1079	-1008192.426	-1025153.089	-927159.9345	-645103.2612	-878342.2495	-949427.6041	-969598.3976	-874389.3655	-617916.8395	-831337.4602	-895667.6133	-911198.6562	-815990.9358	-781556.5563	-903627.4703	-946099.6693	-928824.5532	-817809.2887	-760235.9565	-995146.7887	-1062167.338	-1074364.557
74	-636269.452	-795674.6002	-826540.7526	-808410.9271	-711028.3922	-1002775.947	-1125541.84	-1087543.2	-998385.5493	-796878.3078	-1033428.908	-1185932.749	-1140885.682	-1048900.589	-840431.7471	-997093.3355	-1192556.774	-1162301.023	-1086274.519	-887110.7936	-701532.9651	-845459.1022	-870860.16	-838786.9941	-707408.0543	-1025545.88	-1155223.482	-1125569.767	-1044465.571	-848944.6116	-1048734.138	-1206895.437	-1170428.613	-1086765.403	-885455.4666	-1007410.045	-1206191.046	-1183326.319	-1114413.928	-922433.1972	-766796.4749	-895243.6084	-915179.5059	-869162.9987	-703787.718	-1048315.751	-1184905.08	-1163596.316	-1090545.61
75	-606208.5122	-792320.2328	-866079.5128	-877943.7615	-791319.6447	-765639.7078	-978187.4908	-1021123.437	-1015323.573	-894347.3451	-742755.4109	-958084.277	-998118.865	-993258.9128	-873112.7877	-711578.5297	-923249.5582	-960984.8934	-956936.6021	-840705.8195	-698445.1245	-847636.0505	-903849.3472	-896963.3915	-789772.4657	-815340.3604	-1024785.319	-1066486.947	-1059528.973	-935768.7603	-791393.1192	-1003345.098	-1042167.888	-1036235.309	-913298.999	-757706.8285	-966001.1672	-1002594.857	-997480.1315	-878387.6024	-790681.7398	-902951.8682	-941619.1251	-915982.9591	-788225.2868	-865040.9383	-1071383.084	-1111850.468	-1103734.374
76	-576871.8773	-752356.7125	-813904.1645	-822245.1392	-735824.9903	-694438.9727	-889927.6316	-924711.7863	-903211.721	-766703.7501	-673986.1572	-877433.457	-907788.4005	-886676.9737	-749983.4138	-664358.1658	-872492.9057	-902742.8457	-885089.4065	-753176.4696	-673634.6465	-815281.4095	-862353.1176	-853405.2843	-743427.6338	-752624.1013	-946780.6479	-981801.3049	-960765.3561	-823088.1683	-730208.309	-931875.2723	-962534.1341	-942009.692	-804376.1327	-715741.2001	-921671.6722	-952052.9517	-934769.3451	-801868.9233	-770397.4189	-878206.1049	-910802.0073	-884565.3661	-751030.278	-810809.1674	-1003633.602	-1038890.823	-1018318.991
77	-602339.129	-818008.7216	-897938.025	-927774.2802	-845603.1858	-734091.0227	-980315.3988	-1054790.493	-1070600.736	-982411.203	-691939.1626	-930658.865	-1003873.785	-1023176.571	-937645.1447	-648468.8676	-867557.638	-933272.9642	-948124.907	-863462.9446	-701307.8705	-869961.6172	-931411.9957	-938480.2256	-839500.1091	-787420.0232	-1026956.3	-1096697.264	-1108109.359	-1013699.086	-746693.5335	-978800.6151	-1047220.859	-1062132.75	-969869.2372	-702593.1818	-915931.0226	-977390.4723	-988391.363	-896878.7939	-800276.6086	-921914.5128	-964885.8972	-949186.122	-833397.0256	-840748.9612	-1073597.138	-1138604.049	-1145617.983
78	-598676.8404	-747999.8737	-800631.7893	-803238.0335	-714206.8186	-753936.8233	-930064.7878	-943842.1123	-901866.2564	-744396.3773	-749618.2096	-941492.7949	-949725.799	-906613.0047	-746946.4229	-740164.5359	-949018.6728	-961013.3815	-924861.0996	-771541.0255	-686009.3149	-809504.8837	-850441.259	-836883.3508	-720998.6803	-804894.1484	-982114.2041	-998525.1196	-959409.7286	-803144.9581	-796745.2537	-989016.2755	-1000006.57	-959925.6594	-802046.2072	-781840.2764	-990022.4655	-1004267.161	-970579.6053	-819033.5392	-773341.7914	-871009.8927	-900250.6662	-870528.6056	-727790.5424	-855851.4109	-1034163.542	-1053208.127	-1016953.205
79	-595922.121	-766445.993	-824949.838	-830646.1381	-743207.8994	-751553.6489	-938923.9422	-968371.0013	-941131.1013	-798418.348	-738728.9477	-936625.6644	-961178.8754	-933963.9822	-790360.9437	-722018.0494	-928136.9524	-953601.9516	-931015.218	-792723.3558	-687030.2291	-825360.4185	-870069.4973	-859156.177	-747257.8002	-802977.7908	-989796.9346	-1020181.295	-994114.5257	-850949.6128	-787517.1167	-984338.4501	-1009913.368	-984007.919	-840285.1492	-766436.6234	-970872.4109	-997084.228	-975482.2153	-837031.3628	-778138.3418	-884274.8417	-915189.0929	-887666.1521	-751307.702	-854401.8702	-1040669.865	-1071991.589	-1047097.95
80	-600113.1909	-786264.1372	-859565.0781	-871631.762	-785217.8077	-748785.1454	-961425.1915	-1004681.385	-998638.3414	-877521.2946	-724661.7759	-940035.237	-980348.612	-975267.6498	-855028.1306	-696653.0057	-908406.2337	-946413.6874	-942146.9733	-825795.6159	-693804.664	-842984.5471	-898870.6957	-892182.3565	-785119.1368	-800485.7173	-1010025.053	-1052038.814	-1044840.822	-920940.7954	-775350.6246	-987348.9524	-1026443.002	-1020293.195	-897264.8943	-744546.0524	-952923.2211	-989780.3129	-984452.3973	-865241.1788	-787496.14	-899704.957	-938176.2562	-912732.8886	-785020.466	-852186.2156	-1058624.852	-1099396.254	-1091043.303
81	-589374.9246	-799501.7969	-877225.4107	-904092.9693	-821545.9689	-702214.7303	-942230.9729	-1011417.598	-1022564.399	-927812.3302	-660948.1752	-895312.0717	-962832.6751	-977035.5662	-884699.9651	-626941.2476	-844801.6799	-905798.3855	-916558.7771	-825611.7941	-690331.47	-855252.6482	-914969.9634	-919824.076	-819566.8308	-759348.0246	-993363.9299	-1058464.914	-1065837.913	-965522.0781	-719147.9431	-947519.5825	-1010911.14	-1021363.781	-923050.1969	-683509.1684	-896072.3907	-953386.8992	-960838.4826	-863805.0248	-791288.0128	-911003.4995	-952714.448	-935555.131	-817587.6871	-816481.2564	-1044496.824	-1105512.24	-1109111.426
82	-609790.276	-752683.8405	-802602.6818	-803198.7629	-713324.0877	-786241.9617	-955896.1098	-963988.5738	-916264.1275	-752782.3693	-787651.1349	-975386.7834	-977563.1966	-928298.2066	-762000.7488	-775494.8137	-983695.3635	-990693.1597	-949444.6811	-789968.6953	-693313.4315	-812396.5712	-851362.4599	-836250.5446	-718605.2888	-833343.2654	-1004809.225	-1016219.391	-972042.5623	-810452.3679	-830340.2123	-1019119.985	-1024754.069	-979221.6833	-815498.5236	-812808.078	-1020802.224	-1030653.142	-992468.1966	-835562.4924	-776836.5892	-872109.3006	-900122.1755	-869302.2638	-723886.4905	-880444.5065	-1053722.258	-1068450.208	-1027821.002
83	-603983.5383	-771990.062	-814723.3206	-806845.3086	-713653.7702	-864742.2605	-1016276.225	-1005096.387	-941419.9987	-764881.4801	-873817.6668	-1046377.429	-1029307.182	-964078.8453	-783222.6024	-850949.7569	-1051851.3	-1044136.875	-990081.5311	-816722.5596	-683220.9233	-828772.5521	-862706.177	-839345.0527	-716100.675	-903508.72	-1058791.861	-1052894.011	-994366.6599	-821041.6603	-907337.448	-1082701.101	-1071082.982	-1011216.514	-834374.7063	-879196.0406	-1081298.215	-1078240.953	-1028729.448	-859380.5194	-762458.306	-885555.0451	-910688.9716	-871844.7344	-718547.5809	-942275.1169	-1101307.447	-1100691.623	-1047313.333
84	-544965.2696	-799103.25	-829873.5187	-811289.1874	-714758.6028	-962154.8342	-1072282.174	-1034916.455	-956362.1403	-769776.3046	-986428.5832	-1110827.18	-1064879.382	-984581.288	-792583.3264	-965106.7496	-1117590.63	-1081460.119	-1013980.029	-829884.5322	-788069.4067	-875448.9006	-879362.931	-843647.4535	-714467.0003	-992430.6961	-1109704.119	-1079843.022	-1007770.422	-825319.6941	-1010294.184	-1141238.572	-1103193.222	-1029648.936	-842642.1823	-983193.0529	-1140651.997	-1111692.671	-1050121.968	-871003.7174	-1031173.544	-951794.5513	-928852.2788	-876005.6571	-714175.3968	-1022706.526	-1147126.002	-1124769.604	-1059178.704
85	-648118.2502	-768837.8873	-809399.8883	-803063.3266	-710279.7286	-897655.7992	-1044983.074	-1033469.613	-965919.45	-781703.9466	-918818.9425	-1092280.241	-1073568.707	-1003086.048	-813920.0505	-897341.7404	-1103288.202	-1093052.665	-1034228.443	-853521.9723	-718503.8406	-822369.4117	-854539.4941	-834068.125	-710350.9696	-931458.4712	-1083079.725	-1077243.326	-1015610.631	-835654.1349	-946202.377	-1122941.545	-1110103.151	-1045769.737	-861892.8209	-919609.714	-1126955.337	-1121653.012	-1067957.487	-892567.4829	-788889.4345	-875900.9343	-899679.0373	-865072.8608	-710422.2114	-965261.0808	-1121176.285	-1121017.038	-1065301.819
86	-575367.9452	-761211.9766	-814469.3305	-844475.9228	-759669.4554	-671713.6038	-886760.8889	-932018.8549	-924571.216	-800565.0546	-641075.9057	-858299.9884	-899405.9522	-893933.2841	-771409.4594	-627562.2793	-840537.1326	-877796.9242	-874452.135	-756674.9109	-676757.3074	-824256.9398	-861622.1822	-872389.2657	-767651.9702	-732843.1806	-944598.6273	-988510.0057	-979973.0383	-853405.8897	-701426.6654	-915095.7734	-954939.315	-948415.0067	-823310.3733	-683678.3322	-893118.4415	-929240.0755	-924809.0089	-804343.3888	-778146.6729	-887301.9014	-908774.9722	-900302.5444	-775634.4881	-793972.6948	-1002436.303	-1045001.163	-1035374.854
87	-614439.2077	-799588.4457	-838490.4168	-883480.0535	-798043.8239	-771528.1743	-987917.2882	-1031789.796	-1025504.007	-900196.4359	-747421.532	-965947.6623	-1004943.978	-1001368.792	-877631.6747	-715153.7969	-928446.2308	-962199.9652	-961975.4537	-844080.5581	-708206.7816	-854221.7852	-877332.3532	-902671.1901	-798834.3457	-821084.0135	-1033977.793	-1076487.996	-1069142.822	-941475.0732	-795893.9664	-1010676.06	-1048446.286	-1043796.977	-917662.4348	-760964.5923	-970564.8842	-1003281.601	-1001893.214	-881453.6341	-801974.3618	-908855.1215	-916174.2287	-921862.2611	-799624.8737	-870639.7901	-1080038.235	-1121186.209	-1112781.625
88	-612805.3701	-830630.4224	-912795.5957	-905773.2804	-865144.8093	-745246.233	-998470.9557	-1081747.069	-1103200.607	-1020503.439	-700986.9779	-947211.2257	-1028617.831	-1051151.068	-973770.1953	-653052.2188	-879115.8171	-950380.3797	-964108.0564	-889648.558	-711343.6521	-883239.8069	-944402.8561	-916479.2266	-858616.4962	-797566.544	-1043481.364	-1121187.865	-1137688.951	-1048345.864	-754805.7301	-993772.147	-1069557.564	-1087269.299	-1002606.438	-706460.1409	-926131.28	-992376.0551	-1001970.226	-920025.785	-809881.9341	-935849.1914	-976010.0541	-927185.1029	-852088.183	-849886.7925	-1088491.695	-1160628.677	-1172177.266
89	-605941.9019	-858787.4092	-961803.2233	-1006056.076	-896103.7013	-699184.2544	-993886.4599	-1115577.612	-1186704.436	-1141893.25	-628246.8015	-904511.197	-1028054.184	-1103271.638	-1062736.841	-563026.4052	-800404.6134	-909373.5051	-968367.234	-918362.4424	-712188.4268	-908148.664	-988844.2094	-1006596.897	-884025.8364	-756608.462	-1039564.741	-1151356.776	-1212269.395	-1155794.94	-690388.9716	-955368.9509	-1068782.454	-1133719.331	-1080580.498	-627264.5889	-855257.8816	-955182.9396	-1005153.724	-942674.0958	-818434.9435	-957509.9187	-1015885.141	-1007137.672	-871947.9797	-814032.6071	-1085242.96	-1187135.939	-1237834.322
90	-608984.877	-701507.8896	-831180.9621	-834501.0834	-743529.3856	-746880.4847	-945235.8975	-963738.68	-927316.7139	-781982.6385	-730610.6855	-937516.8976	-950033.4002	-913258.2225	-767154.7725	-716753.3548	-927547.6824	-942098.8175	-910452.8304	-769731.4614	-713489.839	-847653.4824	-889519.2527	-867395.5708	-751123.4091	-800249.3919	-997106.0138	-1017236.036	-982564.032	-836841.9304	-781584.2331	-986518.3353	-1000818.701	-965996.6516	-819777.158	-762819.8908	-971267.9103	-987364.5567	-957427.2562	-816535.9525	-817994.7966	-993799.0752	-947857.4852	-900289.9958	-758717.4331	-853618.2278	-1048976.076	-1070733.391	-1037811.35
91	-590154.3494	-762180.2339	-821605.5805	-828102.5989	-740972.6034	-734261.2504	-924089.5111	-955152.4629	-929650.3913	-788816.2369	-719127.0134	-918704.2595	-945014.0396	-919647.0702	-778135.9889	-704560.5805	-911289.811	-938203.5289	-917110.4305	-780749.8919	-682974.4983	-822308.8343	-867733.2376	-857415.0005	-746098.1549	-787732.3912	-976773.0532	-1008561.128	-984017.5214	-842514.1067	-770165.9418	-968454.3685	-995568.5332	-971292.2717	-829413.1096	-751087.7583	-955976.0859	-983450.2757	-963155.7307	-826385.3615	-775794.6513	-882437.4327	-913860.8313	-886727.3387	-751223.7073	-841203.4694	-1029456.533	-1061969.793	-1038384.652
92	-585462.5351	-771127.0573	-820675.5035	-854553.1683	-769583.9934	-697502.0502	-912896.0149	-957796.029	-950648.5697	-826306.1716	-668551.7389	-886112.2232	-926673.1307	-921690.7029	-798853.4076	-650192.7345	-863249.639	-899603.5932	-897064.97	-779257.3439	-684882.7051	-831998.7635	-865681.1177	-880213.011	-775708.3593	-755641.3951	-967690.9454	-1011240.311	-1003011.26	-876159.7562	-725833.5723	-939790.2351	-979098.1077	-973058.2307	-847687.5065	-703646.2845	-913127.7791	-948369.7067	-944724.7575	-824265.8653	-784302.8791	-892870.4678	-910686.6703	-905872.7893	-781832.7292	-813780.6775	-1022485.813	-1064684.601	-1055373.942
93	-546868.4143	-813047.9488	-837120.3339	-812683.5604	-713945.4206	-1032623.573	-1124302.906	-1071951.877	-980942.2303	-782959.1975	-1067907.842	-1176006.524	-1114148.153	-1020869.802	-816262.3837	-1041679.991	-1183442.323	-1133574.744	-1055248.798	-859311.6135	-813801.5297	-890187.8457	-885468.7725	-844199.5447	-710831.4249	-1055231.662	-1155879.253	-1112607.416	-1029434.452	-836817.5746	-1083044.923	-1199454.186	-1147138.489	-1062000.866	-863768.5505	-1051057.27	-1199281.839	-1158085.338	-1086901.047	-897334.256	-1080734.645	-967327.7426	-933817.1465	-875715.4664	-707717.4281	-1077839.724	-1187455.537	-1153262.973	-1077926.673
94	-590880.6498	-801752.8407	-886653.1429	-817995.6168	-831948.5663	-685749.9497	-929959.8141	-1011350.65	-1037773.715	-931740.9624	-642752.6652	-884028.9125	-964333.4626	-994886.8181	-890404.8103	-612161.5889	-839777.5162	-913028.7412	-938258.1239	-836815.3538	-692719.3296	-861788.7466	-938462.3644	-943671.5563	-848170.0195	-745251.5125	-983262.0101	-1059735.394	-1081351.872	-970733.058	-703065.9028	-938030.069	-1013285.657	-1038987.47	-929640.756	-670160.6312	-891976.9118	-960524.5442	-981333.0886	-874861.1111	-794558.0149	-921824.6579	-990271.5288	-1069347.433	-864391.4727	-804753.0072	-1036564.133	-1108120.138	-1124930.019
95	-632820.8515	-818761.3118	-894521.7129	-905502.124	-817960.4321	-839227.1883	-1051372.148	-1092909.888	-1088171.752	-967810.3418	-821752.7165	-1036886.88	-1075704.276	-1071809.259	-952070.895	-776743.7758	-988055.9194	-1024603.178	-1021508.526	-905804.1762	-718705.5017	-867944.6416	-925586.2758	-917837.5213	-810089.0271	-880196.1384	-1089229.042	-1129567.89	-1123657.844	-1000508.061	-861435.0894	-1073184.706	-1110823.173	-1105839.016	-983304.3391	-815167.1369	-1023099.838	-1058543.509	-1054359.576	-935785.2477	-804590.156	-917127.9714	-956650.7845	-930172.856	-802217.6221	-921165.0093	-1127085.873	-1166225.909	-1159143.937
96	-596775.3469	-766702.2239	-812084.9467	-806495.7667	-714239.9153	-833924.6956	-991881.4546	-986689.2142	-928701.8022	-757737.8303	-838182.6714	-1015220.143	-1004396.033	-945141.4421	-770450.0208	-818321.568	-1020437.229	-1017755.407	-968605.3703	-801007.5989	-679132.5551	-825047.0931	-860885.7091	-839469.6455	-718041.3998	-876262.5586	-1037262.423	-1036668.336	-983181.5175	-814812.0142	-875769.0551	-1054973.327	-1048902.959	-994349.3798	-822970.3551	-850570.8296	-1053414.493	-1054779.469	-1009599.429	-845303.3037	-761489.7612	-883391.965	-909686.4096	-872443.4619	-721842.8854	-918600.3591	-1082643.34	-1086647.446	-1037661.243
97	-605489.2178	-820402.4249	-901280.4385	-896240.494	-851557.3219	-728615.7765	-978151.7582	-1058021.166	-1076667.935	-990249.1947	-684985.8956	-928380.4161	-1006238.587	-1025976.405	-944508.0876	-642095.7604	-866908.6675	-935348.2371	-947179.448	-868695.2368	-705039.8655	-874808.2607	-935150.4224	-909404.3011	-847085.6944	-782890.7962	-1025511.205	-1100206.032	-1114257.372	-1021553.663	-740577.0076	-977077.2429	-1049716.806	-1064986.591	-976656.3629	-696765.6287	-915467.772	-979239.3262	-987228.5669	-901692.2644	-804590.5132	-929214.0965	-969020.3439	-922568.039	-842614.0668	-837165.7533	-1072870.576	-1142390.912	-1151846.783
98	-566856.4167	-766393.6811	-840474.8728	-845902.7997	-779808.8565	-640798.9716	-870856.6282	-932736.9935	-936562.6748	-830492.2402	-600492.4897	-828944.6891	-888065.4252	-893042.0837	-789990.093	-584240.393	-802449.0497	-855971.2979	-857788.2582	-758051.6283	-671752.8419	-830285.6437	-886293.1249	-872045.2938	-786197.5179	-705395.7928	-930620.1295	-989411.8675	-990527.3723	-880077.9627	-665442.5135	-888920.1238	-944948.0655	-947323.1794	-839627.4947	-645573.9443	-859159.3239	-909871.0831	-909385.522	-804882.4629	-776649.267	-894177.6063	-932111.3145	-898187.7223	-792586.1793	-769992.5515	-990383.5621	-1046086.747	-1044492.058
99	-611950.5263	-777834.5437	-817639.4326	-807231.6462	-713005.9225	-898803.9488	-1043239.001	-1025441.259	-955477.0226	-772777.1322	-913203.9101	-1080814.601	-1056840.693	-985009.7634	-797339.7364	-887012.6713	-1086572.288	-1073295.485	-1013818.458	-834091.8131	-687739.6685	-832890.1851	-864718.2831	-839207.3442	-713955.6527	-933623.048	-1082587.675	-1070827.742	-1006729.247	-827927.0928	-942229.003	-1113347.742	-1095597.867	-1029859.229	-846979.5782	-910834.5889	-1112117.218	-1104172.195	-1049873.258	-874939.6247	-763528.8081	-887945.8298	-911797.072	-871182.9796	-714905.3841	-968442.0846	-1121936.299	-1116214.211	-1057981.485
100	-609469.5325	-701382.3189	-831453.2611	-834702.4484	-743686.4531	-748049.1124	-946305.3786	-964625.1164	-928023.0848	-782541.7513	-731917.0896	-938765.2397	-951081.856	-914116.5254	-767851.8088	-717929.5895	-928711.9358	-943091.8143	-911283.4894	-770412.4512	-713942.7138	-848009.7025	-889807.4286	-867569.7522	-751228.8926	-801288.7113	-998056.4322	-1018022.597	-983189.1538	-837335.2627	-782748.7626	-987633.783	-1001754.275	-966761.4151	-820397.8979	-763860.6202	-972303.2955	-988246.7874	-958164.7542	-817141.102	-818415.8907	-994637.0861	-948161.5381	-900436.9935	-758771.3327	-854528.239	-1049807.432	-1071420.077	-1038355.223
101	-611985.2087	-798059.7541	-872253.4142	-883925.8097	-797102.5165	-781613.2207	-994073.5636	-1036706.004	-1031136.607	-910293.8365	-759903.2256	-975189.8279	-1014960.202	-1010309.707	-890252.0936	-725723.8421	-937316.968	-974794.4093	-970953.123	-854836.6123	-702843.0111	-852044.4028	-908567.7464	-901494.5044	-794182.5482	-829418.497	-1038774.011	-1080179.823	-1073449.322	-949821.6134	-806597.014	-1018505.066	-1057070.778	-1051344.071	-928494.9426	-770179.6428	-978395.4813	-1014739.539	-1009826.858	-890846.8145	-793700.8168	-906029.0515	-944882.0225	-919063.1366	-791262.5799	-877223.6977	-1083474.397	-1123653.655	-1115762.036
102	-579476.5214	-784036.6162	-860338.113	-862346.52	-803246.7932	-669485.9227	-905906.5272	-973663.3393	-982330.5976	-882679.7451	-628093.7923	-861427.1716	-926668.8305	-936467.4894	-840466.1967	-603139.8974	-823505.9522	-881901.2139	-886989.5106	-794195.3685	-682626.6515	-844829.7636	-902253.2467	-884249.2907	-806087.7444	-730710.9403	-961618.0193	-1025604.79	-1030946.02	-926293.5645	-689986.5579	-917718.2447	-979172.6735	-985760.0655	-884390.4582	-662296.6359	-877553.4991	-932531.477	-934814.3636	-836507.1393	-785776.7815	-905622.9109	-944168.318	-906151.9947	-808928.6956	-791935.8955	-1017329.44	-1077546.248	-1079561.425
103	-541020.4021	-770198.4646	-814852.2093	-808398.9098	-716444.1791	-816086.1531	-964452.8045	-958148.8657	-905412.1535	-742450.6022	-817537.1269	-975722.4374	-962754.3189	-909361.9006	-743501.0139	-806384.5631	-981092.2334	-973436.1265	-928437.4923	-768887.6275	-734731.4678	-844897.7895	-866706.6491	-842503.0706	-722002.8765	-862255.8917	-1013991.595	-1011928.485	-962864.8901	-801486.7111	-859495.3371	-1020568.356	-1012102.799	-962589.3599	-798851.1228	-842523.064	-1019123.163	-1015529.238	-973885.7287	-816425.3736	-928442.5335	-919597.1145	-918561.0252	-876607.1688	-727561.5733	-908425.5867	-1063530.322	-1065708.114	-1020317.627
104	-541046.2969	-770388.2005	-814950.8117	-808417.882	-716433.1147	-817044.9726	-965160.6147	-958652.7811	-905746.5978	-742629.9728	-818645.7589	-976609.2878	-963424.685	-909855.6534	-743823.1985	-807426.4423	-981988.232	-974145.2142	-928999.008	-769288.0215	-735081.5871	-845098.3322	-866789.727	-842510.5825	-721953.4098	-863110.3811	-1014619.868	-1012374.288	-963159.6576	-801643.1549	-860485.2062	-1021360.456	-1012700.732	-963029.5503	-799138.5747	-843446.4456	-1019920.898	-1016160.471	-974386.1563	-816783.635	-929116.8773	-919808.4639	-918628.5787	-876603.2203	-727473.7042	-909175.7461	-1064079.058	-1066095.804	-1020572.717
105	-577307.3523	-781004.1128	-856923.979	-859520.14	-799218.2332	-664555.1514	-899882.0796	-966628.8361	-974463.9144	-873709.6511	-623349.6245	-855844.0168	-920033.5991	-929003.4427	-831790.2618	-599891.4123	-819886.6492	-877444.3274	-881970.3402	-787982.9093	-680757.6391	-842329.8908	-899509.9887	-882151.643	-802668.972	-726359.7215	-956290.0392	-1019383.877	-1023998.781	-918349.9333	-685767.8778	-912768.3653	-973290.0786	-979153.4557	-876696.5094	-659422.3058	-874391.871	-928636.5626	-930443.6028	-831071.4258	-784207.9258	-903655.6687	-942095.9358	-904783.0794	-806119.7108	-788164.2291	-1012697.928	-1072138.926	-1073533.631
106	-565928.1859	-766087.4134	-843691.0888	-811589.2327	-782290.5383	-633288.7772	-864018.6428	-930120.5665	-941071.229	-827717.2106	-592713.2102	-822781.1117	-886780.7808	-900570.4134	-788696.1286	-578345.7895	-799359.1581	-858366.9073	-869551.2625	-760961.0888	-671102.1004	-831349.5265	-897300.1	-898204.562	-798213.4914	-698873.5437	-924780.3261	-987546.4983	-995315.6531	-878175.348	-658549.5965	-883608.6873	-944212.0579	-954835.9693	-839018.9482	-640291.9665	-856577.2642	-912406.5545	-920676.2718	-808022.3453	-776276.018	-896611.6427	-950909.0517	-984819.8288	-814136.4445	-764458.2445	-985541.9407	-1044972.43	-1049560.071
107	-606410.7642	-702174.8234	-829734.7219	-833431.5894	-742695.1655	-740673.6453	-939555.6471	-959030.6209	-923565.0222	-779013.0674	-723672.085	-930886.6774	-944464.8205	-908699.5861	-763452.6586	-710506.113	-921364.0753	-936824.7924	-906041.0171	-766114.5743	-711084.5206	-845761.5188	-887988.6867	-866470.4552	-750563.1628	-794729.3369	-992058.1321	-1013058.436	-979243.8716	-834221.7337	-775399.1597	-980593.9464	-995849.6598	-961934.8235	-816480.2712	-757292.3472	-965768.7505	-982678.8342	-953510.2419	-813321.8703	-815758.2728	-989348.2143	-946242.5933	-899509.2586	-758431.1606	-848784.9576	-1044560.563	-1067086.25	-1034922.721
108	-619154.6266	-842013.5227	-924803.7628	-958490.6292	-876807.1117	-775436.8473	-1029713.615	-1111048.231	-1132907.291	-1053229.835	-732136.6833	-976506.1766	-1057107.032	-1083024.745	-1006318.818	-676391.726	-897073.7385	-968909.4521	-989068.4285	-912558.5862	-715545.0446	-889040.1989	-952738.4842	-962678.5821	-865354.9926	-823831.4074	-1070527.999	-1146287.349	-1162938.44	-1076188.1	-782422.1286	-1019374.345	-1094317.153	-1115013.009	-1030596.871	-727346.508	-941689.0843	-1008524.818	-1024129.414	-939777.831	-811935.4584	-936066.875	-980673.1348	-966866.4893	-853902.865	-872225.905	-1111342.32	-1181526.484	-1192969.59
109	-560077.3501	-773152.0158	-852484.5756	-875431.6094	-797612.4289	-619079.749	-862470.5555	-934782.0523	-951858.6342	-855497.2844	-569978.7646	-806336.3972	-877434.1784	-897410.2434	-804081.3984	-549805.6348	-768098.9352	-832642.2443	-848336.951	-755630.9936	-668640.7581	-835408.9051	-895843.6211	-898214.2587	-802557.7537	-686074.0764	-923127.6807	-991037.7852	-1003907.916	-901722.3808	-638527.5541	-868595.1108	-935236.5319	-951023.8401	-851408.9707	-615546.6754	-828332.8705	-888897.0127	-900886.3942	-801812.2275	-777204.1677	-897665.7913	-939202.601	-920996.8363	-807503.0847	-753068.3413	-983784.7496	-1047293.512	-1055957.204
110	-586343.9326	-759049.8703	-808266.7947	-805989.9234	-715088.1615	-789326.7146	-956578.2913	-960051.0691	-910296.523	-747399.8183	-786613.0923	-970130.5297	-968345.5884	-917735.9689	-751966.0376	-771103.3222	-974976.0071	-979577.1722	-937525.9059	-778265.5191	-673216.0276	-819655.7538	-858251.1987	-839649.9514	-720849.9413	-836832.9738	-1006105.858	-1013187.169	-966994.8145	-805796.7128	-830084.5049	-1014846.769	-1016804.892	-969939.9188	-806466.4217	-809145.5378	-1013062.255	-1020826.922	-981915.2098	-824931.3047	-760088.121	-880261.6395	-908235.5408	-873309.917	-726611.7219	-884339.1705	-1055633.371	-1066323.261	-1023693.115
111	-626416.282	-812397.9581	-887676.7661	-898869.883	-811549.0163	-821517.5038	-1033759.408	-1075633.642	-1070639.989	-950130.6158	-802741.0946	-1017922.115	-1057032.443	-1052905.203	-933068.7066	-761061.0001	-972459.5136	-1009292.696	-1005968.54	-890137.4983	-713829.6059	-863057.1425	-920355.0307	-912813.9187	-805199.6099	-864587.8398	-1073719.909	-1114386.726	-1108224.484	-984927.794	-844578.6732	-1056376.99	-1094300.479	-1089088.073	-966456.7384	-801338.6443	-1009358.377	-1045078.815	-1040670.875	-921971.8356	-801242.9336	-913716.327	-953033.2405	-926757.892	-798850.2036	-907658.0978	-1113680.348	-1153139.826	-1145808.98
112	-574263.6258	-760580.9237	-831938.1005	-844863.289	-759340.61	-677306.8607	-890338.184	-934952.5079	-927878.1684	-806163.9257	-647928.7249	-863491.3081	-904986.9872	-898968.7473	-778333.1544	-633355.5538	-845457.3802	-884618.8577	-879425.8374	-762563.1362	-674124.9985	-823258.0496	-877756.8002	-871906.5301	-765384.8974	-737488.8634	-947428.4437	-990765.9232	-982550.0403	-858057.0804	-707316.2274	-919511.1172	-959755.545	-952684.4998	-829266.0772	-688732.696	-897461.137	-935435.2852	-929203.2561	-809488.6894	-773986.3728	-885935.1754	-923575.4407	-898949.7086	-771429.1849	-797670.7968	-1004518.641	-1046579.345	-1037221.912
113	-629155.1277	-821492.9026	-768500.6312	-896225.7992	-809726.1803	-782699.5071	-1010557.255	-1071269.259	-1048224.437	-911655.2654	-758422.6514	-989976.6517	-1049805.589	-1025505.789	-888669.9606	-725224.0198	-952426.3526	-1007535.043	-986282.7684	-854423.1121	-723298.9255	-890930.2671	-943167.8632	-934848.0739	-813551.2129	-831535.1082	-1055029.629	-1113082.295	-1090269.18	-952194.1931	-806093.2997	-1032915.334	-1090020.07	-1066137.281	-927896.6561	-770114.3717	-992567.5883	-1045121.872	-1024198.63	-890853.7177	-817442.7163	-960367.6316	-1117835.026	-973470.279	-817376.2526	-880370.6468	-1099501.94	-1154895.33	-1132313.909
114	-582786.205	-756439.9663	-806964.5796	-805817.4009	-715377.4636	-774116.1722	-944537.83	-950965.8902	-904019.2371	-743873.9463	-769024.8237	-954752.3118	-956050.2599	-908389.0858	-745661.9089	-754999.1149	-959471.0486	-966556.142	-926925.975	-770509.1283	-671198.1428	-817816.989	-857352.6753	-839711.4464	-721807.8196	-823385.1594	-995479.6311	-1005178.706	-961474.1939	-802721.9632	-814503.3782	-1001161.246	-1005857.557	-961614.8526	-800837.6068	-795017.0696	-999299.7619	-1009247.101	-972473.2579	-817983.2512	-759610.079	-879194.0139	-907740.709	-873605.4293	-728238.1765	-872654.084	-1046421.378	-1059391.514	-1018929.159
115	-598072.4758	-810033.8027	-889606.9595	-886576.6415	-837783.0202	-711756.668	-957553.1924	-1033969.056	-1049770.466	-959578.985	-668764.8148	-909290.7018	-983551.6521	-1000455.616	-914843.6557	-630988.6617	-854533.682	-920109.4177	-930018.0884	-847453.8286	-698649.4082	-866260.7893	-925770.7772	-902232.1026	-835396.3557	-768013.2717	-1007293.975	-1078935.72	-1090503.633	-994393.0963	-726152.6547	-960152.8007	-1029603.257	-1042397.518	-950349.5011	-686937.8269	-904657.6516	-965921.9807	-972284.2252	-883106.6765	-799226.3405	-922487.7758	-961934.5324	-917887.4952	-833009.6912	-824269.8128	-1057034.683	-1123902.396	-1131236.776
116	-582054.2244	-812806.9102	-904266.5168	-938518.2423	-837169.5311	-655039.4736	-922716.6903	-1019412.852	-1063937.966	-993181.628	-595247.5404	-851373.2067	-948173.5391	-995826.1311	-928383.8383	-553838.3527	-782969.8683	-869261.9525	-906380.1023	-833823.1826	-689353.0895	-869678.3488	-940925.3488	-951241.5676	-834300.1451	-717755.7541	-976576.7227	-1066230.442	-1103572.827	-1024117.27	-660956.0792	-908440.3721	-998054.5072	-1038511.064	-961741.9118	-618981.0361	-840733.0856	-920581.409	-951349.6701	-869530.0569	-796651.9492	-926549.7874	-977584.1237	-963964.8414	-831430.7646	-780471.9721	-1030436.693	-1113048.032	-1143207.666
117	-544960.2007	-799066.1093	-829854.2174	-811285.4736	-714760.7686	-961967.1462	-1072143.621	-1034817.814	-956296.6732	-769741.193	-986211.5696	-1110653.58	-1064748.158	-984484.6364	-792520.2591	-964902.8027	-1117415.239	-1081321.316	-1013870.113	-829806.1555	-788000.8711	-875409.6446	-879346.6685	-843645.9831	-714476.6833	-992263.4306	-1109581.135	-1079755.757	-1007712.722	-825289.0704	-1010100.418	-1141083.519	-1103076.177	-1029562.769	-842585.9139	-983012.3019	-1140495.841	-1111569.107	-1050024.01	-870933.588	-1031041.542	-951753.1799	-928839.0553	-876006.43	-714192.5971	-1022559.683	-1147018.587	-1124693.715	-1059128.77
118	-538845.7745	-754264.5593	-806571.6385	-806805.63	-717373.3614	-735565.0731	-905011.3333	-915830.3538	-877325.7223	-727387.1742	-724434.8797	-901245.2827	-906457.3749	-867896.8428	-716444.1473	-718888.1759	-905846.8199	-913887.3685	-881281.7477	-735262.7834	-705328.6663	-828056.339	-859729.8113	-841872.2238	-726157.0654	-790496.3896	-961229.5941	-974490.262	-938110.4943	-788348.6619	-776366.7301	-954048.3057	-961888.7552	-925622.4381	-774711.0856	-764978.0398	-952129.794	-962518.6727	-931860.1263	-786338.7927	-871811.5582	-901848.1188	-912887.9209	-876938.755	-734940.7691	-845427.6563	-1017447.792	-1033150.177	-998895.2663
119	-613250.9894	-700402.5711	-833577.8358	-836273.5704	-744911.95	-757167.1649	-954649.8545	-971541.4111	-933534.444	-786904.1496	-742110.1234	-948505.2527	-959262.2839	-920813.3131	-773290.3367	-727106.9945	-937795.8593	-950839.5317	-917764.5891	-775725.7781	-717476.2061	-850789.0597	-892055.8807	-868928.7776	-752051.913	-809397.8548	-1005471.938	-1024159.629	-988066.5793	-841184.4183	-791834.8401	-996336.9064	-1009053.96	-972728.375	-825241.1336	-771980.7647	-980381.7432	-995130.2688	-963918.9779	-821862.6952	-821701.4182	-1001175.548	-950533.8678	-901583.9222	-759191.8765	-861628.4729	-1056293.967	-1076777.848	-1042598.715
120	-585950.2979	-759070.9791	-819167.9959	-826248.6471	-739343.3261	-721657.0526	-913276.8929	-945517.6471	-921282.2554	-781817.3867	-704839.4258	-905641.5873	-933231.707	-909211.6647	-769225.3829	-691836.0651	-899010.155	-926979.8247	-906975.4171	-772022.5943	-680018.3304	-820084.5755	-866030.3692	-856145.8803	-745252.905	-776620.2234	-967280.1203	-1000091.344	-976657.9501	-836365.5792	-757518.9026	-956876.6741	-985112.7751	-962024.0066	-821488.6254	-739900.1759	-945118.354	-973512.6703	-954171.1211	-818625.6337	-774086.3667	-881098.17	-912892.6792	-886043.0501	-751162.4848	-831583.3317	-1021283.285	-1054665.04	-1032033.645
121	-598100.0297	-839699.6799	-947890.8302	-1008574.693	-813618.8677	-675010.5612	-961225.4849	-1079698.358	-1158484.401	-1136339.134	-606888.187	-880194.9594	-1000012.642	-1084349.8	-1073474.481	-550355.0289	-792486.4092	-899303.7804	-970497.9345	-953906.1973	-703891.4982	-894393.9816	-981452.9315	-1030185.754	-970264.1554	-735345.0519	-1010923.286	-1120235.675	-1188731.161	-1153660.107	-671111.2924	-934046.8191	-1044437.741	-1118260.228	-1093345.499	-615441.0829	-848683.812	-946919.3778	-1008532.246	-977931.9305	-809682.9667	-949088.2832	-1015014.994	-1051796.753	-1126909.443	-795679.4723	-1060621.025	-1160773.008	-1218977.922
122	-539125.2535	-756312.3545	-807635.8417	-807010.3953	-717253.9447	-745913.4893	-912650.6382	-921269.0486	-880935.337	-729323.0974	-736400.2036	-910816.9451	-913692.5512	-873225.8533	-719921.4444	-730133.0454	-915517.2175	-921540.4617	-887342.1144	-739584.1845	-709107.4585	-830220.7703	-860626.4613	-841953.299	-725623.177	-799718.7844	-968010.4661	-979301.7513	-941291.8822	-790037.139	-787050.2607	-962597.3362	-968342.1688	-930373.3567	-777813.5173	-774943.979	-960739.6544	-969331.4899	-937261.1769	-790205.4629	-879089.6636	-904129.186	-913617.0175	-876896.1402	-733992.4089	-853524.0306	-1023370.232	-1037334.461	-1001648.427
123	-643623.637	-801725.3339	-852608.0341	-851682.1099	-761694.5896	-894567.9164	-1061609.947	-1077693.002	-1036080.644	-877831.2117	-900843.896	-1084842.038	-1094867.8	-1052369.922	-891465.6553	-866397.5079	-1067468.787	-1080952.368	-1046012.741	-891748.1485	-720572.5611	-850598.1014	-889391.1929	-873556.3235	-756848.4776	-929062.652	-1097509.052	-1116284.198	-1077620.332	-920714.2396	-931017.4866	-1115705.437	-1128550.238	-1089170.831	-930200.7723	-893377.181	-1094070.301	-1109841.849	-1077426.614	-925077.5684	-797521.4932	-899470.8649	-926174.2872	-895430.4726	-752002.3673	-963557.325	-1133408.095	-1154875.394	-1119160.019
124	-576386.7358	-781036.1837	-861698.1596	-814274.3979	-803104.1527	-655277.2987	-891657.1571	-964167.2595	-981603.0088	-871317.6182	-613686.6955	-848452.4515	-919286.1315	-940102.0936	-831326.2001	-592519.3087	-816300.0669	-881277.8117	-898348.9852	-792754.5669	-680162.7235	-844107.7897	-914552.8088	-917261.5509	-819152.2189	-718312.3575	-949292.2785	-1017803.677	-1031376.785	-916969.8907	-677208.115	-906418.8089	-973163.4949	-990107.142	-877002.0789	-652811.0877	-871414.6358	-932574.6789	-946099.9072	-836037.0764	-783938.7152	-907179.3998	-967407.3996	-1020248.641	-835200.285	-781347.3496	-1006927.329	-1071440.095	-1081150.553
125	-651966.8831	-807895.8762	-857445.5981	-855361.412	-764928.0089	-919581.8641	-1083068.375	-1096813.995	-1052687.819	-891720.9393	-929198.6532	-1110765.861	-1118250.697	-1073079.743	-909149.4013	-891650.2347	-1091838.657	-1103226.625	-1066126.413	-909068.1057	-726439.2914	-855012.3049	-892770.6591	-876074.9849	-758525.9375	-951115.5575	-1116348.468	-1133093.101	-1092225.937	-932916.4398	-956116.4562	-1138682.215	-1149300.451	-1107564.378	-945927.4877	-915579.7523	-1115618.26	-1129563.75	-1095257.225	-940477.313	-800911.7084	-902128.7293	-928095.6555	-896788.4931	-752123.8679	-982649.1883	-1149628.499	-1169372.208	-1131764.054
126	-676259.772	-780698.6619	-814390.5965	-802963.8853	-708044.471	-979459.1037	-1110393.334	-1084484.628	-1002377.843	-802939.0162	-1015126.191	-1178106.843	-1144058.767	-1057997.473	-852040.7232	-986805.3248	-1191096.768	-1168208.014	-1096479.166	-900184.6507	-736999.3772	-829691.7635	-856872.1656	-832465.7285	-704290.4066	-1003497.531	-1140548.22	-1122048.887	-1047599.584	-854158.0107	-1031271.774	-1199170.377	-1172768.948	-1094631.268	-895956.8735	-998026.605	-1204896.064	-1188467.783	-1123383.936	-934422.2174	-797738.9867	-878684.8629	-899353.6723	-861967.5092	-700536.3432	-1027535.895	-1170703.008	-1159613.146	-1092821.333
127	-640535.2236	-833564.3362	-766016.0751	-907353.0389	-820570.8845	-808602.3701	-1038166.064	-1100557.144	-1075787.872	-937547.5357	-785912.2855	-1019349.483	-1081158.289	-1054839.366	-916133.6835	-747986.8974	-976935.9715	-1033743.553	-1010736.702	-877172.9181	-732848.5509	-902707.5799	-954931.3175	-946159.8179	-822990.0924	-854503.4603	-1079549.74	-1139122.025	-1114746.705	-975152.4565	-830563.6863	-1059103.884	-1118017.72	-1092289.148	-952342.8692	-790230.8752	-1014265.309	-1068361.351	-1045843.522	-910956.9325	-825161.8702	-971850.8235	-1143846.489	-984966.5264	-825409.3083	-900404.488	-1120933.353	-1177686.907	-1153705.522
128	-576487.6635	-781180.4432	-861871.9325	-814300.3105	-803305.0095	-655489.4936	-891923.8758	-964495.8189	-981994.1509	-871738.3734	-613889.095	-848700.1865	-919599.8165	-940483.5845	-831737.5913	-592656.0868	-816463.551	-881498.9078	-898626.8907	-793061.3821	-680250.1608	-844230.9102	-914719.3019	-917445.4558	-819354.283	-718499.947	-949528.8252	-1018095.667	-1031724.784	-917344.2681	-677388.1745	-906638.9324	-973442.8837	-990447.5179	-877368.6259	-652931.9004	-871557.8203	-932769.3065	-946345.2518	-836307.4258	-784012.6622	-907281.3814	-967566.6129	-1020590.539	-835403.5565	-781510.3338	-1007133.704	-1071695.515	-1081455.409
129	-646182.3907	-839554.5671	-764783.159	-912874.7306	-825952.3731	-821456.1981	-1051866.436	-1115090.728	-1089465.728	-950396.1073	-799553.5199	-1033925.22	-1096716.5	-1069395.623	-929762.0601	-759282.5643	-989098.4272	-1046749.053	-1022871.525	-888462.0984	-737587.38	-908551.8587	-960768.7192	-951773.0666	-827673.966	-865901.0902	-1091717.402	-1152043.772	-1126893.235	-986545.0801	-842706.6738	-1072099.479	-1131911.048	-1105266.539	-964473.8609	-800213.3268	-1025032.41	-1079893.523	-1056584.409	-920932.7898	-828992.3609	-977549.1502	-1156754.209	-990671.3316	-829395.5672	-910345.9198	-1131568.305	-1188996.815	-1164320.724
130	-608670.4076	-794766.285	-868710.6879	-880493.1731	-793784.1719	-772447.2522	-984957.7703	-1027764.369	-1022062.725	-901143.3736	-750063.4158	-965374.2701	-1005296.256	-1000525.57	-880417.1663	-717606.9371	-929244.7653	-966870.192	-962910.1215	-846728.0389	-700319.4028	-849514.7891	-905860.2206	-898894.4478	-791651.9416	-821340.139	-1030746.978	-1072322.536	-1065461.506	-941757.7637	-797872.6701	-1009805.928	-1048519.158	-1042674.317	-919775.1613	-763022.4556	-971283.3393	-1007770.642	-1002742.023	-883697.4325	-791968.4011	-904263.2931	-943009.697	-917295.6601	-789519.7114	-870232.9506	-1076536.124	-1116880.716	-1108860.287
131	-600140.374	-854380.6022	-950771.848	-987224.4873	-919230.8387	-700346.1735	-989957.7561	-1102031.628	-1159102.079	-1103558.886	-633231.3693	-901437.9281	-1015679.624	-1078287.224	-1028328.507	-572081.9579	-799155.7032	-900355.0501	-950722.3174	-896770.1572	-707399.259	-901674.4726	-974663.224	-987790.964	-907711.3812	-757547.3332	-1035758.638	-1138660.079	-1186730.813	-1120622.328	-695114.0464	-952472.9937	-1057356.174	-1110865.062	-1049164.119	-635942.8511	-854188.5224	-947160.6395	-989627.3805	-923825.4736	-814658.1479	-948968.3351	-998554.5299	-988357.3548	-896191.9393	-814748.4305	-1081559.472	-1175288.514	-1214359.562
132	-612303.9213	-803617.9901	-772179.6659	-879749.0126	-793667.7613	-744343.5482	-969675.1976	-1027900.891	-1007409.569	-873314.9918	-717717.0633	-946482.4975	-1003379.724	-982069.761	-848002.7407	-691517.63	-916133.4557	-968726.4933	-950072.328	-820736.0785	-709158.2093	-873490.8773	-925748.9946	-918098.0804	-799574.4848	-797524.4598	-1018721.196	-1074523.667	-1054023.807	-918198.4836	-769858.4965	-994136.3411	-1048562.232	-1027412.607	-891697.6482	-740326.6305	-960438.4425	-1010709.749	-992147.711	-861085.6539	-806012.4914	-943363.7646	-1079318.255	-956447.0799	-805481.214	-850705.3088	-1067767.132	-1121146.443	-1100638.034
133	-579796.2234	-754246.5535	-805870.1734	-805672.4098	-715620.5984	-761332.9445	-934418.7985	-943330.534	-898743.6872	-740910.7368	-754243.3099	-941828.1664	-945717.0333	-900533.7884	-740363.7999	-741464.8344	-946440.3881	-955613.0219	-918017.5926	-763990.5107	-669502.2741	-816271.6563	-856597.5392	-839763.1279	-722612.8387	-812083.3616	-986549.149	-998448.2426	-956834.5599	-800137.8854	-801408.7046	-989659.6738	-996657.21	-954618.3095	-796107.0442	-783143.2375	-987733.502	-999515.2003	-964538.0629	-812143.9756	-759208.3234	-878296.7611	-907324.843	-873853.7835	-729605.0797	-862833.7162	-1038679.445	-1053565.943	-1014925.44
134	-595432.0624	-838557.4113	-936488.8514	-976341.5173	-870174.4885	-679761.9157	-962573.9617	-1073268.091	-1132690.985	-1076464.734	-613728.1469	-881132.1242	-992909.1702	-1055998.937	-1003625.674	-558983.9462	-792733.8646	-891725.6621	-941094.8126	-881167.7819	-702141.5844	-891222.9148	-967761.3923	-982242.2636	-862148.0697	-739514.4718	-1011851.96	-1113903.821	-1164446.266	-1097860.836	-677439.409	-934721.8272	-1037664.344	-1091830.637	-1028295.195	-623620.0818	-848867.4204	-939959.3359	-981481.604	-910492.9802	-808851.0995	-943888.4182	-999033.8777	-988142.9613	-854121.6578	-799266.9653	-1061129.897	-1154539.551	-1196201.519
135	-605840.4499	-854114.5567	-967138.2395	-1033454.108	-825057.0205	-688140.5852	-983159.1651	-1110336.193	-1199730.426	-1189774.747	-616304.3337	-896579.9082	-1025676.139	-1121149.089	-1123661.817	-552161.1205	-797869.6451	-912677.0874	-993310.6508	-988977.5466	-711193.8225	-906723.1382	-997991.8502	-1053188.303	-998817.6195	-746902.5468	-1030367.565	-1147434.291	-1225425.692	-1201312.602	-679482.2158	-948535.629	-1067219.412	-1151026.972	-1138133.769	-617020.9141	-853171.2928	-958506.926	-1028518.876	-1008822.401	-816547.1952	-959331.7196	-1028845.424	-1072922.436	-1172578.219	-805664.4372	-1077575.902	-1184532.407	-1251120.957
136	-642999.2553	-801263.5504	-852246.0064	-851406.7628	-761452.6109	-892695.9532	-1060004.068	-1076262.048	-1034837.817	-876791.7493	-898721.9173	-1082901.983	-1093117.9	-1050820.065	-890142.2608	-864507.6752	-1065645.024	-1079285.434	-1044507.499	-890451.9788	-720133.5139	-850267.7567	-889138.2846	-873367.835	-756722.9419	-927412.2836	-1096099.171	-1115026.274	-1076527.295	-919801.0663	-929139.1606	-1113985.929	-1126997.359	-1087794.318	-929023.8356	-891715.6121	-1092457.721	-1108365.925	-1076092.228	-923925.1012	-797267.7805	-899271.9589	-926030.4982	-895328.8427	-751993.2746	-962128.5515	-1132194.212	-1153790.499	-1118216.774
137	-604993.7811	-821798.3446	-902179.3022	-932623.451	-850529.3301	-740618.2623	-988113.8644	-1063671.867	-1080437.033	-993591.2962	-698285.1201	-937896.7514	-1012277.685	-1032624.765	-948486.6147	-652877.0318	-872217.3263	-938898.8743	-954588.6352	-871213.6429	-703555.4843	-872973.541	-934778.7951	-942300.4051	-843581.8034	-793168.2657	-1033834.937	-1104526.02	-1116765.192	-1023564.187	-752333.9845	-985205.9645	-1054655.921	-1070480.923	-979456.2709	-706500.9739	-919997.4317	-982305.6321	-994033.3068	-903651.2381	-802117.184	-924148.7374	-967378.2185	-951977.3105	-836634.2697	-845718.2067	-1079555.946	-1145380.187	-1153093.351
138	-611326.6688	-830977.049	-921856.1986	-823245.0002	-872638.2949	-728736.5716	-983991.9308	-1077910.483	-1117011.616	-1016977.9	-683754.9347	-934215.2871	-1027880.037	-1072169.567	-973744.7821	-639870.2145	-872896.2704	-957818.5823	-994556.4439	-898970.2476	-710432.4613	-886730.607	-972190.6745	-980927.1569	-889104.3388	-783253.5646	-1031181.832	-1118886.889	-1151849.847	-1046574.735	-739542.5108	-982622.8839	-1069884.482	-1107941.108	-1003896.157	-694634.9793	-920983.3405	-999952.3673	-1031035.212	-929628.7158	-809538.2612	-942484.1724	-1022525.095	-1138609.251	-905570.3826	-837770.4875	-1078371.656	-1159863.294	-1186688.063
139	-658305.0465	-773131.3045	-811206.4476	-803027.3304	-709470.5999	-927267.3321	-1068660.578	-1051936.261	-979116.8253	-789390.7139	-953680.679	-1123348.146	-1099085.02	-1022963.136	-827719.1453	-929726.1763	-1135073.547	-1120257.741	-1056762.243	-870413.1412	-725198.9392	-825019.9899	-855383.8851	-833488.0822	-708157.1394	-957535.4982	-1103882.433	-1093462.247	-1027190.138	-842352.2521	-976996.1848	-1150535.205	-1132787.202	-1063456.856	-874223.4818	-947995.4175	-1155168.677	-1145838.927	-1088021.006	-907718.2504	-792092.8357	-876908.6735	-899561.2602	-863948.7715	-706843.6798	-987803.6018	-1139104.194	-1134988.233	-1075263.458
140	-582818.5716	-788708.81	-865598.2869	-866701.1382	-809453.6165	-677082.7875	-915188.4249	-984501.4349	-994450.8374	-896500.0156	-635403.1562	-870029.1674	-936891.7662	-947967.3849	-853833.2547	-608144.8553	-829082.2312	-888767.962	-894722.5726	-803766.9368	-685506.2486	-848681.3305	-906479.7987	-887481.1474	-811355.0648	-737414.8858	-969826.8659	-1035189.382	-1041649.667	-938532.3584	-696486.3001	-925344.5495	-988236.0181	-995938.9035	-896244.5652	-666725.1312	-882424.6359	-938532.3919	-941548.4174	-844881.9712	-788193.9256	-908653.851	-947361.248	-908261.0895	-813256.513	-797746.9215	-1024465.235	-1085877.339	-1088848.478
141	-618789.1497	-841643.4333	-934704.7698	-825160.944	-887489.4169	-744426.0241	-1003712.818	-1102203.793	-1145932.225	-1048088.065	-698720.1292	-952532.5381	-1051073.555	-1100376.576	-1004162.584	-649983.4345	-884984.1037	-974166.182	-1015104.46	-921655.8231	-716897.4806	-895834.0005	-984500.9864	-994524.8752	-904044.7326	-797123.7261	-1048671.826	-1140476.27	-1177580.518	-1074255.774	-752855.9089	-998898.572	-1090542.178	-1133108.12	-1030998.23	-703567.738	-931570.2387	-1014342.913	-1049175.718	-949618.0449	-815005.8196	-950024.5758	-1034297.149	-1163888.744	-920600.0482	-849821.3575	-1093630.755	-1178748.746	-1209228.795
142	-576579.7631	-762402.2451	-815214.3585	-845685.6586	-760859.6588	-674809.4108	-889898.3135	-935113.3087	-927701.7052	-803655.1798	-644374.2772	-861638.7437	-902679.2755	-897265.4589	-774704.0032	-630278.9812	-843263.6844	-880414.7336	-877166.7217	-759385.8479	-677732.7312	-825186.3169	-862109.4423	-873328.4772	-768619.1097	-735580.0214	-947370.7741	-991238.6942	-982738.6911	-856137.4066	-704356.6237	-918060.2516	-957839.4881	-951373.334	-826236.7574	-686075.4105	-895520.488	-931536.5165	-927199.8204	-806735.0079	-778885.7025	-887970.387	-909004.4644	-900971.2316	-776378.5639	-796350.5694	-1004843.172	-1047364.086	-1037775.67
143	-622903.4138	-814861.3988	-769865.5348	-890112.9932	-803768.5866	-768469.6369	-995390.2148	-1055179.81	-1033082.324	-897431.2144	-743321.0805	-973840.5366	-1032581.824	-1009391.238	-873582.6241	-712719.1166	-938961.8681	-993137.2637	-972848.8749	-841925.39	-718052.7901	-884460.3401	-936705.5495	-928633.9095	-808365.9162	-818917.3266	-1041559.381	-1098777.235	-1076822.327	-939581.9538	-792650.3677	-1018528.52	-1074639.418	-1051770.619	-914467.004	-759063.2677	-980647.8349	-1032355.146	-1012307.898	-879809.914	-813202.1596	-954059.2814	-1103545.495	-967154.7567	-812963.2524	-869364.9538	-1087728.484	-1142374.66	-1120562.317
144	-591256.6083	-762653.747	-810064.9538	-806228.1504	-714688.6799	-810330.1385	-973204.3198	-972596.3063	-918964.4912	-752268.5061	-810899.791	-991365.4876	-985323.5492	-930642.5794	-760671.0714	-793340.76	-996385.9743	-997557.2157	-952162.7829	-788975.904	-676002.4168	-822194.8056	-859491.9217	-839565.0364	-719527.2584	-855402.3409	-1020779.046	-1024245.627	-974617.944	-810042.47	-851599.6486	-1033744.376	-1031921.48	-981435.557	-814238.9509	-828654.7833	-1032066.146	-1036816.878	-994953.0957	-834525.4997	-760748.2236	-881735.8666	-908918.8276	-872901.8599	-724365.8379	-900474.4808	-1068353.719	-1075894.938	-1030271.407
145	-621667.3825	-845757.3919	-939660.3843	-825899.9117	-893217.403	-750477.3491	-1011319.043	-1111573.573	-1157086.725	-1060087.063	-704492.1124	-959597.3887	-1060019.151	-1111255.845	-1015894.542	-653884.041	-889646.3064	-980471.3503	-1023029.703	-930405.5094	-719390.9986	-899345.1231	-989248.9976	-999769.4312	-909807.1502	-802473.3618	-1055417.609	-1148803.161	-1187504.679	-1084932.18	-757990.8043	-1005176.004	-1098509.724	-1142814.882	-1041451.333	-707013.0479	-935653.5399	-1019893.258	-1056172.4	-957327.8057	-817114.6231	-952932.8629	-1038837.557	-1173638.888	-926396.8974	-854469.3036	-1099516.096	-1186032.749	-1217922.616
146	-576033.8787	-779223.7939	-854919.6129	-857860.8319	-796853.1504	-661660.3995	-896345.2532	-962499.0274	-969845.5503	-868443.4978	-620564.4235	-852566.2641	-916138.1944	-924621.4581	-826696.8031	-597984.2951	-817761.8326	-874827.7832	-879023.691	-784335.7052	-679660.3812	-840862.2681	-897899.4796	-880920.1582	-800661.8827	-723805.2126	-953162.0943	-1015731.71	-1019920.203	-913686.3947	-683291.1796	-909862.3954	-969836.531	-975274.8541	-872179.5541	-657734.8471	-872535.7458	-926349.9404	-927877.6212	-827880.2329	-783286.8837	-902500.7423	-940879.2839	-903979.4181	-804470.615	-785949.9631	-1009978.865	-1068964.4	-1069994.84
147	-607852.1079	-798895.7303	-773151.6068	-875396.1148	-789425.3895	-734210.5307	-958874.8261	-1016443.677	-996626.9472	-863186.1181	-706963.3122	-934992.0528	-991114.7684	-970594.6723	-837259.1258	-682612.9526	-906545.4655	-958473.9087	-940506.1214	-811836.5147	-705422.4631	-868883.6756	-921147.2141	-913673.0059	-795882.0616	-788539.4022	-1009129.101	-1064337.108	-1044448.372	-909217.3727	-760285.8537	-983891.5649	-1037609.749	-1017182.181	-882134.4619	-732457.196	-951950.4473	-1001618.629	-983680.3818	-853221.4179	-802992.8128	-938871.6208	-1069142.754	-951949.8289	-802338.7392	-842868.2113	-1059383.314	-1112230.538	-1092269.786
148	-624662.2514	-787159.7046	-822292.234	-807848.0671	-711972.2493	-953151.064	-1086259.448	-1057902.512	-977905.7022	-785375.0373	-976046.6172	-1135760.819	-1100771.778	-1018406.083	-819864.3248	-944552.8421	-1141971.349	-1119819.494	-1051691.905	-861805.3195	-694949.5509	-839460.0731	-867928.6984	-838987.6233	-710533.1631	-981671.9538	-1120555.076	-1099441.899	-1026454.369	-838913.1422	-997900.2119	-1162245.978	-1134712.583	-1059604.607	-867091.2773	-961315.4639	-1161290.469	-1145546.78	-1083609.257	-899764.9498	-765236.8474	-891760.4455	-913565.1012	-870127.1171	-709094.0783	-1010192.781	-1154850.657	-1140981.271	-1075003.051
149	-542833.7346	-783485.0924	-821757.0364	-809727.4802	-715669.3723	-883229.3672	-1014018.601	-993436.5309	-928832.2724	-755011.3748	-895171.2585	-1037825.871	-1009698.023	-943937.9055	-766062.6212	-879344.1988	-1043836.287	-1023091.385	-967758.7267	-796926.001	-759249.2537	-858941.1819	-872524.3469	-843029.1077	-718538.8694	-922093.1868	-1057987.655	-1043146.678	-983506.5618	-812441.9896	-928812.8608	-1076036.689	-1053974.224	-993414.5543	-818980.5062	-907184.6679	-1074986.175	-1059732.567	-1008929.149	-841513.3349	-975664.7729	-934397.2714	-923291.5933	-876330.6726	-721408.3658	-960956.9678	-1101956.647	-1092856.838	-1038180.851
150	-649423.5973	-765667.7192	-857013.8987	-855439.6386	-763224.8537	-893078.449	-1060568.237	-1074994.635	-1027476.234	-866461.1755	-895046.2416	-1074343.24	-1085145.155	-1037949.704	-874524.2975	-859541.5197	-1050366.131	-1067870.807	-1030820.265	-874687.6696	-729482.1844	-817561.748	-894544.1168	-880372.0941	-761257.5038	-928812.794	-1097572.585	-1114749.199	-1070605.725	-911070.3628	-926737.1302	-1106809.681	-1120374.948	-1076686.022	-915265.198	-887701.1383	-1078507.832	-1098199.576	-1064030.177	-909843.3279	-809540.7676	-869455.7777	-932074.2783	-905304.4891	-759290.1539	-964547.061	-1134576.871	-1154503.764	-1113735.199
151	-598977.4752	-785135.7303	-858351.2708	-870455.6735	-784080.878	-745644.7054	-958301.9425	-1001617.806	-995529.4521	-874386.1671	-721290.4647	-936672.2349	-977037.5551	-971915.4132	-851658.4922	-693871.9954	-905640.5392	-943698.6956	-939391.2837	-823017.4602	-692940.0265	-842117.852	-897943.0444	-891291.5263	-784252.1015	-797717.9139	-1007274.835	-1049346.754	-1042104.04	-918177.9628	-772361.4938	-984368.4577	-1023513.05	-1017322.768	-894277.3267	-742093.8602	-950486.4621	-987392.6325	-982024.9941	-862791.6607	-786902.5805	-899099.9736	-937534.7609	-912127.3166	-784423.3251	-849791.049	-1056247.665	-1097075.712	-1088678.629
152	-539406.82	-758375.4451	-808707.9936	-807216.69	-717133.636	-756339.1995	-920347.0024	-926748.3658	-884571.9126	-731273.4802	-748454.8984	-920460.0998	-920981.7682	-878594.6669	-723424.714	-741461.9045	-925259.8448	-929250.7171	-893447.747	-743937.8628	-712914.4751	-832401.368	-861529.8084	-842034.9798	-725085.3008	-809010.0629	-974841.9856	-984149.1784	-944497.0324	-791738.2277	-797813.5884	-971210.2208	-974843.7839	-935159.7606	-780939.1216	-784984.3554	-969413.8233	-976195.1931	-942702.5688	-794101.0139	-886422.1303	-906427.2909	-914351.5598	-876853.2071	-733036.9652	-861680.878	-1029336.906	-1041549.998	-1004422.152
153	-601277.1428	-849808.3886	-950567.5193	-992867.363	-884595.1021	-690563.7107	-979988.5065	-1096798.665	-1162730.737	-1112853.01	-621802.7425	-894134.4694	-1012455.181	-1082289.799	-1036500.536	-561232.1726	-796999.9758	-901540.5657	-956262.4559	-901853.7099	-707729.1675	-900636.2237	-979486.6677	-995787.1699	-874315.4587	-749021.3484	-1027264.511	-1134733.4	-1191043.25	-1130081.071	-684641.3491	-946204.7902	-1054970.779	-1115127.166	-1057373.831	-625646.9859	-852421.4956	-948425.9912	-994646.9284	-928390.6093	-814181.1846	-951464.0587	-1008405.761	-998706.9296	-864035.8231	-807478.9236	-1074540.453	-1172668.135	-1219355.734
154	-606927.9672	-751477.4666	-802095.0708	-803208.8772	-713551.4385	-777921.6471	-949243.1519	-958799.7739	-912555.8995	-750622.5243	-777855.6064	-966657.2542	-970393.5661	-922713.0981	-758123.4484	-766395.3626	-974764.2463	-983049.0169	-943113.0836	-785222.5769	-691432.2277	-811651.8058	-851125.201	-836413.5263	-719221.7161	-826016.0841	-998964.0334	-1011662.162	-968788.9266	-808570.316	-821687.6995	-1011366.657	-1018380.254	-974251.9169	-812033.827	-804832.1997	-1012874.777	-1023857.33	-986830.7044	-831305.3959	-775936.4904	-871826.1438	-900155.2688	-869618.1129	-724891.9943	-874110.4587	-1048684.835	-1064524.55	-1025021.958
155	-620289.3257	-754329.9276	-839857.4171	-842288.0701	-752115.445	-810507.7745	-989674.5534	-1012271.21	-974583.2351	-823279.1903	-802487.4141	-991035.0988	-1010066.465	-972923.7481	-820170.9198	-777536.9907	-973882.0254	-997318.3631	-967966.586	-821570.7771	-707773.2977	-811283.5658	-882033.7279	-870295.4111	-754579.2941	-855747.4199	-1035084.011	-1059398.406	-1023947.751	-873047.5185	-844590.728	-1032868.466	-1053634.83	-1018851.219	-866893.8912	-815512.5114	-1010991.604	-1035746.683	-1008292.775	-862631.8487	-795257.2669	-868237.2047	-924209.9804	-898302.6912	-757043.1431	-900986.9912	-1080493.406	-1106525.602	-1073312.256
156	-578787.7685	-764570.9862	-816571.8444	-847889.8702	-763028.2812	-680450.158	-895614.8904	-940751.5902	-933405.6456	-809285.5746	-650384.1091	-867722.1572	-908643.468	-903336.8824	-780706.8609	-635228.976	-848231.6264	-885184.5404	-882112.8624	-764325.3388	-679510.0121	-826879.6981	-862997.2596	-875039.7772	-770381.2963	-740566.7104	-952421.7929	-996210.5295	-987777.8772	-861114.3954	-709695.1846	-923461.7098	-963123.7786	-956763.5849	-831568.8059	-690443.0319	-899897.1617	-935720.7706	-931556.0232	-811092.6823	-780232.2591	-889188.4083	-909422.6131	-902189.62	-777734.3148	-800683.2004	-1009228.633	-1051669.476	-1042150.102
157	-659715.6544	-688363.9167	-859683.5552	-855578.7386	-759970.2483	-869205.2696	-1057182.633	-1056525.408	-1001255.291	-840507.1355	-867357.0636	-1068185.698	-1059779.322	-1003100.117	-840116.2678	-839874.3928	-1049414.602	-1046039.639	-997401.1258	-841013.3018	-760894.0053	-884940.4207	-919683.7441	-885627.8073	-762164.7785	-909038.9852	-1096589.987	-1099568.441	-1047997.962	-888480.9323	-903480.0512	-1103276.567	-1098748.871	-1046047.417	-884752.4107	-871757.0702	-1079645.699	-1079711.072	-1034624.023	-879879.2898	-862072.3488	-1081516.925	-979683.8779	-915676.8135	-764359.3096	-948872.6235	-1135997.293	-1142611.474	-1094740.634
158	-611272.7154	-830761.7767	-912211.0127	-944092.9861	-862180.9272	-756056.8609	-1006559.239	-1084678.599	-1103702.403	-1020035.089	-713294.9402	-955016.2127	-1032155.066	-1054972.171	-974129.477	-663303.4729	-883238.6866	-952205.5973	-969877.0132	-889546.0359	-708871.6684	-880097.5146	-942742.1409	-951336.111	-853236.0592	-806764.3362	-1050104.68	-1123043.039	-1137238.461	-1046897.688	-765675.1004	-1000356.262	-1072241.755	-1090226.498	-1002132.069	-715743.9065	-929615.5341	-993931.2479	-1007377.954	-919669.8089	-806470.6176	-929433.2526	-973273.1989	-958579.1887	-844291.1837	-857471.7491	-1093650.059	-1161407.494	-1170774.519
159	-595943.7292	-786263.9208	-775751.5001	-863752.3304	-778077.2562	-707105.214	-929984.3709	-985796.1999	-967783.9728	-836091.8859	-678197.564	-904255.686	-958306.6251	-939899.3823	-808520.4915	-658793.3847	-880898.0697	-931048.7562	-914916.9957	-788030.6253	-695429.5284	-856559.6405	-908837.6809	-901836.1521	-786005.0137	-764504.8214	-983470.7267	-1037088.569	-1018834.56	-885193.3489	-734679.5113	-956487.2994	-1008312.402	-989816.3018	-856553.4153	-711406.8513	-929245.4831	-977300.3348	-961030.6986	-832184.9788	-794915.3231	-926855.3602	-1041923.795	-939919.9066	-793932.7758	-821904.3662	-1036957.02	-1088380.939	-1069885.138
160	-592736.4358	-763739.3298	-810606.6068	-806299.9106	-714568.3454	-816656.9241	-978212.5184	-976375.2629	-921575.512	-753735.0834	-818215.5857	-997762.0175	-990437.7591	-934530.3911	-763293.2574	-800039.2632	-1002835.222	-1002973.279	-956571.7966	-792202.1546	-676841.7508	-822959.635	-859865.6602	-839539.4577	-719128.8314	-860995.9244	-1025198.997	-1027576.726	-976914.2318	-811321.4041	-858080.5778	-1039436.834	-1036474.995	-984898.3467	-816580.2418	-834531.483	-1037790.619	-1041633.474	-998880.451	-837415.5245	-760947.0639	-882179.9427	-909124.6517	-872778.9423	-723689.3183	-905334.8622	-1072185.423	-1078778.18	-1032252.962
161	-577058.9322	-781996.9776	-862855.5179	-814446.98	-804441.8944	-656690.5546	-893433.5517	-966355.5234	-984208.085	-874119.9226	-615034.7125	-850102.411	-921375.3296	-942642.891	-834066.1387	-593430.2753	-817388.9004	-882750.3514	-900199.885	-794798.0111	-680745.0718	-844927.7943	-915661.6825	-918486.39	-820498.0019	-719561.7374	-950867.7214	-1019748.38	-1033694.522	-919463.3105	-678407.3435	-907884.8709	-975024.2743	-992374.1062	-879443.3472	-653615.7221	-872368.2698	-933870.9334	-947733.9461	-837837.6514	-784431.2154	-907858.6153	-968467.7886	-1022525.737	-836554.1094	-782432.8536	-1008301.82	-1073141.236	-1083180.95
162	-591386.4717	-781429.8113	-776746.462	-859296.3314	-773734.4011	-696732.1894	-918928.1857	-974067.6142	-956745.9581	-825723.1032	-667189.1033	-892493.0826	-945751.1666	-928152.4988	-797522.4071	-649677.7943	-871082.9817	-920553.3326	-905124.2073	-778920.2695	-691605.2987	-851843.3142	-904126.9043	-897306.2668	-782225.1331	-755306.947	-973651.4371	-1026660.735	-1009032.325	-875999.5146	-724880.1342	-945999.869	-997100.502	-979343.5616	-846763.7187	-703351.0242	-920556.4442	-967993.8853	-952362.8153	-824134.4733	-791824.1214	-922256.817	-1031507.28	-935316.1353	-790715.8694	-813881.642	-1028374.626	-1079253.856	-1061318.683
163	-589525.3673	-832858.4628	-924729.8783	-957604.1035	-887007.1045	-678814.0086	-956179.0406	-1057717.565	-1104191.333	-1037833.055	-616472.1046	-876240.0452	-979050.4283	-1030362.475	-968912.5086	-566179.6745	-790926.9733	-882414.0208	-923594.5262	-859374.249	-697129.8957	-884116.9002	-953779.3633	-964056.9262	-879850.1179	-738609.9435	-1005916.198	-1099546.415	-1138290.479	-1062623.102	-680121.0195	-930248.9027	-1024999.635	-1068513.899	-996767.3697	-630538.7273	-847337.8683	-931723.243	-966114.7729	-891497.1245	-804734.4274	-935375.3311	-982828.7793	-970509.6668	-872693.1444	-798405.8159	-1055653.307	-1141375.252	-1172389.637
164	-598513.9117	-784675.1499	-857855.8327	-869975.6311	-783616.8189	-744362.8761	-957027.13	-1000367.349	-994260.5008	-873106.5062	-719914.401	-935299.5628	-975686.0854	-970547.1352	-850283.1114	-692736.874	-904511.6693	-942590.521	-938266.4975	-821883.504	-692587.1085	-841764.0942	-897564.4062	-890927.9173	-783898.2049	-796588.1832	-1006152.282	-1048247.939	-1040986.972	-917050.2611	-771141.4242	-983151.9131	-1022317.135	-1016110.332	-893057.8952	-741092.9521	-949491.8535	-986418.0562	-981034.2042	-861791.8442	-786660.3081	-898853.0384	-937272.9226	-911880.141	-784179.5909	-848813.417	-1055277.371	-1096128.54	-1087713.443
165	-541790.0112	-775837.5354	-817782.7353	-808962.7777	-716115.3379	-844582.875	-985489.3713	-973125.5509	-915352.0502	-747781.6077	-850486.3726	-1002080.191	-982678.0253	-924036.5451	-753076.5437	-837349.8732	-1007721.877	-994510.6625	-945126.0929	-780787.5901	-745137.2331	-850858.0441	-869175.7789	-842726.3297	-720532.693	-887651.8573	-1032664.271	-1025178.017	-971625.5666	-806136.3176	-888914.873	-1044110.06	-1029873.744	-975672.0966	-807394.3755	-869966.5483	-1042832.375	-1034289.883	-988758.7521	-827073.131	-948484.455	-925878.5527	-920568.7587	-876489.8191	-724950.0474	-930720.7982	-1079839.108	-1077230.494	-1027899.083
166	-570887.9146	-757226.9365	-828330.2759	-841367.5771	-755961.2902	-667972.4659	-881054.8863	-925846.5694	-918637.5523	-796845.3213	-637908.1068	-853495.3875	-895145.4645	-889004.8249	-768317.5085	-625089.4992	-837236.8492	-876549.0314	-871235.0443	-754305.5663	-671555.0184	-820681.9537	-874999.5231	-869258.6969	-762807.7905	-729262.064	-939253.9125	-982764.2573	-974415.4473	-849845.0559	-698431.572	-910652.131	-951046.7875	-943855.4371	-820386.0683	-681443.9942	-890218.3081	-928338.3333	-921988.2355	-802207.9363	-772222.1237	-884136.9708	-921668.7109	-897149.7543	-769654.2908	-790551.5934	-997452.8762	-1039681.951	-1030193.342
167	-580401.6347	-786692.0637	-862888.9898	-887701.7384	-804894.5514	-680151.2697	-915870.4974	-981396.6612	-989315.6195	-890021.2327	-639497.4864	-870846.473	-934425.7042	-945098.6576	-848053.486	-612040.7131	-829050.9402	-886781.6104	-894709.9983	-799412.7821	-682734.0564	-845071.704	-903589.4638	-906911.0554	-805769.8341	-739917.7399	-970112.6711	-1032002.051	-1036579.353	-932175.932	-700082.0167	-925868.1363	-985779.0441	-993145.1757	-890643.9799	-670299.9982	-882327.0612	-936772.6116	-941767.5103	-840912.7201	-785066.4759	-903451.3443	-944289.8708	-926120.3189	-806645.1123	-799684.1477	-1024354.782	-1082607.45	-1083843.087
168	-590582.2018	-776794.4836	-849378.7396	-861761.9625	-775676.6302	-722430.3983	-935214.7122	-978971.6616	-972548.3692	-851211.1304	-696369.5448	-911812.737	-952562.0392	-947135.4935	-826749.9381	-673314.6122	-885196.3719	-923629.3255	-919021.0732	-802481.1783	-686548.5777	-835711.1933	-891085.7946	-884706.4598	-777842.9285	-777258.1573	-986945.0672	-1029446.896	-1021873.598	-897754.9508	-750265.6728	-962336.4749	-1001854.68	-995365.2037	-872193.0612	-723967.1186	-932473.8048	-969742.7663	-964081.4951	-844684.6872	-782514.9559	-894627.903	-932792.7918	-907650.8945	-780009.2269	-832085.8442	-1038675.36	-1079922.14	-1071198.826
169	-592135.9471	-743373.857	-823278.5603	-829579.2887	-741380.068	-730717.0908	-921167.7197	-951659.559	-923471.0381	-781551.0568	-713044.8585	-910531.7776	-937515.5243	-910087.0865	-767647.5123	-698293.3913	-899972.9878	-929141.2801	-907229.0661	-770242.2249	-686795.3061	-805216.7575	-869944.5389	-860557.99	-748125.9264	-785142.0119	-974699.303	-1005911.165	-978860.6591	-836304.8278	-765210.0319	-961416.7048	-989141.7205	-962963.5983	-820151.1502	-745754.3322	-945748.5137	-975396.4547	-954431.9404	-817009.8863	-781454.6633	-867059.6585	-916610.4579	-891536.6299	-754871.7847	-839566.8627	-1028230.824	-1060162.771	-1034250.272
170	-665461.4515	-686875.2228	-862911.7754	-857966.006	-761832.3499	-883059.8454	-1069861.785	-1067034.486	-1009629.617	-847135.6538	-882845.0373	-1082985.322	-1072209.208	-1013275.662	-848379.9289	-853819.1527	-1063217.32	-1057812.036	-1007248.94	-849086.7242	-766263.0285	-889163.5608	-923100.1918	-887692.801	-763415.3304	-921360.5573	-1107857.599	-1108893.457	-1055409.047	-894329.5955	-917286.0419	-1116500.672	-1109840.499	-1055114.013	-892111.5454	-884095.3581	-1091920.63	-1090170.291	-1043367.374	-887053.5927	-867064.5978	-1091451.899	-983288.5535	-917419.5334	-764998.3118	-959661.1913	-1145853.366	-1150752.428	-1101188.477
171	-618630.9586	-841417.3253	-934432.4033	-825120.3295	-887174.6	-744093.4361	-1003294.771	-1101688.819	-1145319.16	-1047428.585	-698402.8942	-952144.2455	-1050581.894	-1099778.638	-1003517.781	-649769.0525	-884727.8635	-973819.6425	-1014668.88	-921174.9299	-716760.4338	-895641.025	-984240.03	-994236.6282	-903728.0233	-796829.7038	-1048301.07	-1140018.614	-1177035.074	-1073668.986	-752573.6889	-998553.5569	-1090104.273	-1132574.625	-1030423.715	-703378.3797	-931345.8156	-1014037.86	-1048791.172	-949194.3073	-814889.9172	-949864.7329	-1034047.602	-1163352.864	-920281.4465	-849565.9008	-1093307.29	-1178348.409	-1208750.972
172	-612584.0629	-803915.1502	-772118.5041	-880022.9297	-793934.7233	-744981.194	-970354.8383	-1028621.865	-1008088.092	-873952.3768	-718393.7704	-947205.5629	-1004151.527	-982791.86	-848678.8099	-692077.9793	-916736.8043	-969371.6632	-950674.3058	-821296.106	-709393.2906	-873780.7972	-926038.5733	-918376.5394	-799806.8399	-798089.8672	-1019324.803	-1075164.682	-1054626.366	-918763.6428	-770460.8793	-994781.0195	-1049251.445	-1028056.383	-892299.4359	-740821.8346	-960972.5711	-1011281.831	-992680.5391	-861580.5309	-806202.5123	-943646.4441	-1079958.574	-956730.0808	-805678.9622	-851198.478	-1068294.705	-1121707.499	-1101164.627
173	-591107.5147	-836066.2985	-928611.3865	-962018.9678	-891809.9935	-682023.3386	-961213.6967	-1064322.496	-1112375.679	-1047629.37	-618970.0425	-879995.7438	-984509.9432	-1037505.571	-977768.355	-567059.3991	-792153.4506	-885088.0986	-927637.8741	-864948.0411	-698660.5256	-886733.8244	-956892.0647	-967594.4413	-884002.7885	-741432.5269	-1010364.16	-1105376.236	-1145510.422	-1071267.781	-682355.7029	-933561.363	-1029822.318	-1074826.263	-1004577.01	-631344.2021	-848358.9458	-934024.1588	-969619.2843	-896315.6061	-806213.5399	-937401.3436	-985172.6738	-973169.8322	-876195.597	-800841.6528	-1059514.574	-1146429.962	-1178645.178
174	-607646.7866	-823418.711	-904676.3142	-899051.759	-855564.3379	-733520.1789	-984143.9882	-1065018.05	-1084492.549	-999171.3184	-689704.6925	-933933.7133	-1012838.335	-1033400.536	-953137.6253	-645326.8732	-870508.6152	-939781.2889	-952171.7768	-874874.4729	-706898.8828	-877294.7646	-937879.0101	-911490.731	-850486.1838	-787218.7455	-1030810.692	-1106393.677	-1121167.459	-1029454.813	-744773.127	-982000.6512	-1055567.942	-1071557.87	-984309.1659	-699624.5875	-918612.4923	-983113.4113	-991575.9536	-907098.9086	-806150.9789	-931170.8182	-971081.6434	-923929.6336	-845408.0297	-840917.2496	-1077477.32	-1147769.317	-1157842.341
175	-636848.9745	-760774.2228	-849609.0015	-849763.2992	-758429.9295	-857440.1773	-1029969.863	-1047922.621	-1004647.124	-847823.4288	-855096.9901	-1038386.671	-1052740.494	-1009883.896	-851064.8738	-824147.6017	-1017354.879	-1037419.715	-1003692.032	-851761.9243	-720112.4269	-814852.0261	-889144.5165	-876022.904	-758375.1263	-897277.0985	-1070601.935	-1090859.282	-1050467.709	-894659.3493	-891281.9784	-1074895.964	-1091569.292	-1051723.982	-894387.6917	-856543.855	-1049367.199	-1071244.326	-1039973.395	-889466.414	-803375.8757	-868929.8302	-928679.9741	-902282.4479	-758320.3231	-937113.9432	-1111233.944	-1133795.943	-1096288.281
176	-643530.2605	-801656.274	-852553.8927	-851640.9317	-761658.4016	-894287.9637	-1061369.788	-1077479.002	-1035894.779	-877675.7598	-900526.5534	-1084551.902	-1094606.102	-1052138.14	-891267.7413	-866114.8828	-1067196.042	-1080703.077	-1045787.631	-891554.3059	-720506.9014	-850548.6983	-889353.3704	-873528.135	-756829.7037	-928815.8388	-1097298.204	-1116096.075	-1077456.868	-920577.6742	-930736.5823	-1115448.284	-1128318.005	-1088964.973	-930024.761	-893128.6928	-1093829.139	-1109621.124	-1077227.056	-924905.2166	-797483.5504	-899441.1185	-926152.7835	-895415.2738	-752001.0075	-963343.6515	-1133226.558	-1154713.148	-1119018.957
177	-579623.3264	-765391.6856	-817085.5469	-848723.9924	-763848.9356	-682584.7408	-897778.1689	-942885.24	-935564.1421	-811416.2398	-652658.3618	-870024.2548	-910900.4497	-905634.4427	-782978.4743	-637102.163	-850111.605	-886989.5403	-883984.5909	-766194.5508	-680182.5743	-827520.5108	-863333.2292	-875687.3708	-771048.1464	-742453.7833	-954333.2096	-998091.9814	-989684.8162	-862997.7975	-711715.4135	-925505.7405	-965123.4704	-958803.3744	-833586.5703	-692095.836	-901553.3913	-937304.1845	-933204.5062	-812741.7222	-780741.8258	-889649.3343	-909580.8498	-902650.6849	-778247.3608	-802322.7633	-1010888.188	-1053298.73	-1043805.483
178	-642555.3598	-692810.0234	-850042.2109	-848448.9687	-754408.9291	-827827.4424	-1019315.306	-1025139.183	-976244.6795	-820710.5217	-821100.9593	-1023985.408	-1022656.446	-972710.0173	-815436.166	-798227.2234	-1008191.653	-1010880.408	-967989.8209	-816901.3634	-744858.9768	-872327.6661	-909480.2427	-879460.5344	-758429.9027	-872239.5991	-1062938.338	-1071718.517	-1025864.15	-871013.4199	-862247.3272	-1063781.693	-1065622.815	-1018969.284	-862773.7513	-834907.7613	-1042985.611	-1048473.754	-1008511.29	-858452.6454	-847162.5876	-1051845.309	-968918.2185	-910472.0377	-762450.8772	-916651.6804	-1106561.321	-1118297.85	-1075483.62
179	-672706.8737	-779201.2259	-813760.514	-802976.4398	-708326.6748	-969131.3458	-1102135.217	-1078043.926	-997774.9305	-800258.0651	-1002967.294	-1167271.14	-1135159.318	-1051064.844	-847227.946	-975510.448	-1180010.839	-1158719.568	-1088619.943	-894293.4358	-734664.2952	-828767.3084	-856577.6633	-832668.0329	-705055.5594	-994402.5195	-1133292.759	-1116392.135	-1043560.943	-851821.8758	-1020531.668	-1189546.402	-1164857.321	-1088462.445	-891656.2491	-988126.3855	-1195055.961	-1180032.344	-1116386.285	-929138.0108	-796621.7209	-878333.3888	-899394.75	-862359.5633	-701784.445	-1019673.631	-1164450.204	-1154740.344	-1089346.964
180	-618295.5539	-699095.5614	-836412.0752	-838369.4892	-746546.7957	-769330.8907	-965781.6084	-980767.9331	-940886.7445	-792723.7056	-755707.9028	-961498.6903	-970175.1933	-929747.0069	-780545.4782	-739349.8981	-949914.0559	-961175.1939	-926410.5493	-782813.8981	-722189.9792	-854496.7963	-895055.3759	-870741.7538	-753149.8441	-820215.6689	-1015364.42	-1032346.595	-994573.1952	-846319.2948	-803955.9104	-1007947.106	-1018791.935	-980688.459	-831702.1395	-782813.2544	-991158.6083	-1004313.017	-971595.2662	-828161.4268	-826084.3996	-1009898.031	-953698.619	-903113.9558	-759752.8931	-871100.3747	-1064947.179	-1083925.257	-1048259.646
181	-578528.4802	-784097.4537	-865385.721	-814824.277	-807366.4495	-659780.1978	-897317.0846	-971139.48	-989903.2717	-880246.2873	-617981.7313	-853709.5331	-925942.7097	-948197.5521	-840056.1598	-595421.8197	-819769.2952	-885969.6001	-904246.3002	-799265.3648	-682018.1948	-846720.4788	-918085.8889	-921164.1187	-823440.1368	-722293.117	-954311.936	-1023999.866	-1038761.53	-924914.3953	-681029.0825	-911089.9585	-979092.2881	-997330.1164	-884780.4191	-655374.8043	-874453.0932	-936704.7896	-951306.2628	-841774.0472	-785507.9136	-909343.5082	-970785.9985	-1027503.898	-839513.8241	-784805.9694	-1011306.716	-1076860.251	-1087619.78
182	-543770.6675	-790350.1762	-825324.6999	-810413.9409	-715269.0364	-917921.6759	-1039628.812	-1011669.357	-940933.242	-761501.4156	-935284.1321	-1069914.169	-1033953.423	-961803.0234	-777720.0054	-917041.8014	-1076255.587	-1048747.82	-988075.6629	-811413.1822	-771917.3782	-866197.2793	-875530.3002	-843300.9065	-716749.0473	-953010.5913	-1080720.033	-1059276.845	-994171.9322	-818102.4857	-964628.6161	-1104696.689	-1075608.821	-1009341.661	-829381.1818	-940594.7503	-1103850.103	-1082572.039	-1027035.776	-854476.0641	-1000064.089	-942044.3824	-925735.8363	-876187.8095	-718229.0575	-988099.4707	-1121811.192	-1106884.345	-1047410.622
183	-607216.8374	-749242.6837	-832159.3389	-836386.9881	-747130.676	-773458.4814	-957864.7024	-984127.3378	-950850.2542	-803903.5217	-760956.4571	-953654.906	-976378.8093	-943746.7341	-795782.6701	-740741.7258	-939563.7633	-965661.6256	-939764.2688	-797737.3358	-698032.5646	-808466.5583	-876420.3419	-865774.024	-751582.795	-822963.1357	-1007045.515	-1034562.619	-1003012.414	-855986.7458	-807731.8049	-999691.1936	-1023688.676	-992900.8604	-845189.7845	-783121.6218	-980697.2105	-1007724.197	-983283.5162	-841448.1543	-788848.2893	-867690.4334	-920681.286	-895160.9987	-756034.914	-872467.7175	-1056226.265	-1084997.899	-1055174.563
184	-628244.0558	-820526.4833	-768699.5407	-895334.9706	-808857.971	-780625.7662	-1008346.939	-1068924.519	-1046017.754	-909582.3726	-756221.8763	-987625.1108	-1047295.544	-1023157.39	-886471.2598	-723401.661	-950464.1525	-1005436.832	-984325.0264	-852601.7999	-722534.3981	-889987.3947	-942226.1003	-933942.4742	-812795.5517	-829696.2995	-1053066.589	-1110997.596	-1088309.55	-950356.1921	-804134.2405	-1030818.721	-1087778.624	-1064043.605	-925939.5322	-768503.8773	-990830.5043	-1043261.357	-1022465.776	-889244.2872	-816824.7334	-959448.306	-1115752.59	-972549.9082	-816733.1393	-878766.7702	-1097786.176	-1153070.673	-1130601.331
185	-640090.1801	-799112.0411	-850559.2723	-850123.8848	-760325.2008	-883974.2333	-1052522.066	-1069595.05	-1029047.322	-871948.7587	-888835.3432	-1073863.013	-1084964.886	-1043599.084	-883976.3937	-855702.6993	-1057147.877	-1071518.974	-1037494.379	-884412.9554	-718087.936	-848728.6375	-887959.9517	-872489.6426	-756138.0548	-919723.003	-1089530.352	-1109165.442	-1071434.697	-915546.4731	-920387.7958	-1105974.519	-1119762.294	-1081380.961	-923540.3346	-883974.1469	-1084944.502	-1101489.406	-1069875.153	-918555.6066	-796085.6997	-898345.23	-925360.5666	-894855.3359	-751950.9104	-955471.7101	-1126538.574	-1148735.834	-1113822.071
186	-591572.1822	-762885.2481	-810180.4616	-806243.4533	-714663.0185	-811679.3285	-974272.3205	-973402.1706	-919521.2927	-752581.2544	-812459.8877	-992729.5507	-986414.1569	-931471.6571	-761230.2538	-794769.219	-997761.2794	-998712.1939	-953103.0072	-789663.9035	-676181.4052	-822357.9059	-859571.6216	-839559.5817	-719442.2937	-856595.1753	-1021721.602	-1024955.986	-975107.6285	-810315.2033	-852981.7098	-1034958.295	-1032892.519	-982173.9986	-814738.2323	-829907.9924	-1033286.893	-1037844.019	-995790.6061	-835141.7989	-760790.6264	-881830.5661	-908962.7197	-872875.6476	-724221.5698	-901510.9595	-1069170.832	-1076509.791	-1030693.974
187	-576970.6977	-752429.7987	-813961.4623	-822288.7181	-735863.2881	-694735.2469	-890181.793	-924938.2622	-903408.4223	-766868.265	-674322.0011	-877740.5081	-908065.356	-886922.2683	-750192.8664	-664657.2682	-872781.5512	-903006.67	-885327.6401	-753381.6134	-673704.1342	-815333.6929	-862393.1452	-853435.1162	-743447.5023	-752885.3039	-947003.7888	-982000.3956	-960938.3501	-823232.6956	-730505.5902	-932147.4175	-962779.907	-942227.5518	-804562.4056	-716004.1753	-921926.894	-952286.545	-934980.5373	-802051.3234	-770437.5738	-878237.5856	-910824.7647	-884581.451	-751031.7171	-811035.2983	-1003825.722	-1039062.529	-1018468.278
188	-596213.1171	-809263.5926	-888150.6353	-916584.084	-834235.3617	-719028.4289	-962319.2583	-1034295.377	-1047901.991	-956611.4446	-677294.9045	-913956.3457	-984480.5144	-1001373.433	-912626.8106	-638296.361	-856804.7013	-920290.3246	-933208.8752	-845577.0344	-696121.1612	-863011.1469	-923642.5961	-929664.5829	-830080.9812	-774155.083	-1011082.803	-1078631.224	-1088134.714	-990933.8692	-733677.3385	-964019.3011	-1030063.326	-1042868.075	-947745.7049	-693575.3595	-906547.1676	-966047.9966	-975371.7232	-881250.3531	-796029.2022	-916758.7011	-959134.4882	-942745.0316	-825926.5946	-829281.6746	-1059846.285	-1122967.084	-1128367.437
189	-632211.2692	-818155.6523	-893870.2158	-904870.8721	-817350.1982	-837541.5933	-1049695.78	-1091265.547	-1086503.091	-966127.5983	-819943.2041	-1035081.827	-1073927.104	-1070009.985	-950262.2804	-775251.1006	-986571.4648	-1023145.937	-1020029.441	-904313.0331	-718241.4174	-867479.453	-925088.3697	-917359.3784	-809623.6559	-878710.5518	-1087752.894	-1128122.958	-1122188.908	-999025.1424	-859830.7078	-1071584.96	-1109250.555	-1104244.673	-981700.7966	-813850.951	-1021791.936	-1057261.95	-1053056.695	-934470.4971	-804271.5698	-916803.2535	-956306.4693	-929847.8222	-801897.1137	-919879.4312	-1125809.945	-1164980.385	-1157874.725
190	-622343.0027	-785458.333	-821443.3325	-807735.6014	-712160.8425	-943235.4565	-1078410.386	-1051979.97	-973813.5994	-783076.555	-964580.9927	-1125735.906	-1092756.571	-1012312.939	-815754.7235	-934054.663	-1131863.815	-1111331.209	-1044781.911	-856749.0023	-693634.111	-838261.3999	-867342.9595	-839027.7113	-711157.5948	-972905.4519	-1113627.94	-1094221.259	-1022855.529	-836908.7423	-987743.0241	-1153324.516	-1127576.12	-1054177.576	-863421.9066	-952105.2502	-1152318.831	-1137998.005	-1077454.139	-895235.58	-764925.2164	-891064.4705	-913242.525	-870319.7587	-710154.3485	-1002575.385	-1148845.447	-1136462.532	-1071897.474
191	-649777.0794	-834297.9138	-860216.2073	-918757.2079	-832751.3921	-861805.126	-1079407.852	-1122027.286	-1116792.329	-990307.7028	-843605.4751	-1063309.238	-1100397.489	-1098538.474	-973703.9991	-794375.6496	-1007955.318	-1038538.011	-1041135.624	-923134.3009	-736651.1525	-881323.3886	-891541.3644	-930059.5745	-827037.14	-900893.1372	-1114816.478	-1156059.392	-1149792.132	-1021128.949	-881334.5982	-1097123.327	-1133018.351	-1130064.878	-1002998.839	-830865.8897	-1040611.058	-1070248.209	-1071611.763	-951195.7355	-823525.2346	-928348.8589	-922866.4613	-941361.874	-821322.897	-939981.0859	-1150225.04	-1190091.516	-1182791.918
192	-638084.9265	-830965.1842	-766551.0355	-904957.1853	-818235.8648	-803025.1139	-1032221.493	-1094251.045	-1069853.071	-931972.5603	-779993.3748	-1013025.093	-1074407.605	-1048523.428	-910220.3519	-743085.7249	-971658.7006	-1028100.487	-1005471.421	-872274.5601	-730792.3802	-900171.7563	-952398.4778	-943724.2379	-820957.7669	-849558.0462	-1074270.21	-1133515.3	-1109476.344	-970209.2146	-825294.8627	-1053465.115	-1111989.426	-1086658.277	-947079.2505	-785899.5048	-1009593.48	-1063357.56	-1041183.068	-906628.4234	-823499.8261	-969378.3284	-1138245.85	-982491.2202	-823679.6767	-896090.916	-1116318.864	-1172779.555	-1149099.602
193	-603227.9237	-819277.5119	-899358.0321	-929397.814	-847252.4908	-736276.3848	-982926.3756	-1057764.035	-1073893.992	-986154.3706	-694063.8303	-933082.1562	-1006687.465	-1026339.888	-941274.9391	-649944.7495	-869117.7318	-935156.5554	-950289.005	-866057.9286	-702060.3861	-870970.0288	-932539.222	-939759.2464	-840866.6868	-789344.572	-1029259.312	-1099318.382	-1111007.388	-1017001.985	-748581.993	-980945.1676	-1049710.166	-1064927.772	-973079.0382	-703901.5359	-917292.4827	-979036.0996	-990280.3223	-899146.2521	-800892.8452	-922662.5456	-965720.3425	-950120.63	-834480.8759	-842412.6968	-1075592.186	-1140872.744	-1148120.784
194	-607561.9959	-825596.0707	-915374.3504	-822278.4447	-865146.1998	-720821.5554	-974043.136	-1065654.992	-1102421.745	-1001283.442	-676205.2922	-924974.599	-1016179.37	-1057939.693	-958399.6073	-634768.2965	-866798.1993	-949571.544	-984190.3789	-887525.8267	-707170.9879	-882138.1263	-965980.3675	-974067.3789	-881567.2078	-776256.3444	-1022358.478	-1107995.476	-1138869.236	-1032610.202	-732826.1667	-974412.1235	-1059463.086	-1095244.852	-990223.7007	-690128.5805	-915642.4614	-992692.6236	-1021883.687	-919544.4975	-806779.987	-938680.1891	-1016586.329	-1125856.251	-897988.2158	-831691.0638	-1070673.744	-1150335.96	-1175316.713
195	-584492.3734	-792621.8544	-875654.0899	-816355.4681	-819235.2244	-672318.9528	-913077.6967	-990554.298	-1013016.152	-905109.0244	-629941.6711	-868348.3818	-944478.5912	-970740.1343	-864365.5715	-603504.1404	-829429.6948	-899034.3356	-920667.9405	-817395.3074	-687184.9329	-853995.7627	-927924.0896	-932031.1938	-835380.2563	-733377.9243	-968289.6547	-1041253.748	-1059325.064	-947036.6314	-691668.9334	-924097.2234	-995601.5825	-1017443.183	-906439.955	-662513.7197	-882913.9698	-948205.4796	-965803.8603	-857749.1935	-789877.4972	-915369.6758	-980194.0318	-1047706.857	-851525.2881	-794436.8284	-1023501.54	-1091953.197	-1105633.966
196	-588286.2032	-773900.5129	-822411.5	-857371.9848	-772357.2972	-704715.6185	-920206.5567	-965006.4441	-957942.9514	-833506.5008	-676237.3045	-893891.8874	-934300.3312	-929455.0339	-806530.0544	-656522.9464	-869602.8024	-905703.375	-903390.2533	-785574.1231	-687155.5489	-834164.3137	-866816.4869	-882401.4764	-777961.8999	-762018.5329	-974150.3502	-1017598.453	-1009455.533	-882524.489	-732660.695	-946697.793	-985855.8277	-979951.4563	-854506.3009	-709231.7386	-918724.8097	-953720.6649	-950295.6092	-829838.5989	-786024.8988	-894428.1123	-911221.4123	-907430.9034	-783566.507	-819321.3848	-1028094.081	-1070190.471	-1060968.106
197	-595969.1275	-781446.8138	-827134.9765	-865041.7083	-779903.1851	-724343.031	-940097.8247	-984625.2773	-977790.2493	-853097.8912	-697148.9756	-915059.5916	-955053.1967	-950581.0179	-827417.4582	-673746.8331	-886889.1377	-922300.2835	-920600.7294	-802761.4603	-693339.7343	-840056.5634	-869905.7153	-888356.0762	-784093.5633	-779370.1001	-991725.7576	-1034898.336	-1026989.768	-899842.3032	-751236.6271	-965492.5811	-1004242.922	-998707.2478	-873059.5725	-724429.2123	-933953.7814	-968280.098	-965453.3509	-845001.4612	-790710.3458	-898666.3106	-912676.3929	-911670.3791	-788283.9464	-834397.1067	-1043353.628	-1085171.403	-1076189.276
198	-639505.0913	-825402.5359	-901665.5601	-912423.9771	-824651.8172	-857710.2069	-1069753.99	-1110940.541	-1106469.08	-986262.0938	-841594.5246	-1056679.784	-1095191.458	-1091538.804	-971902.8577	-793111.3759	-1004333.378	-1040582.226	-1037727.101	-922154.9757	-723794.3147	-873045.5645	-931045.9553	-923080.4909	-815191.952	-896486.0092	-1105415.417	-1145411.975	-1139765.137	-1016768.676	-879027.5797	-1090726.369	-1128067.368	-1123321.427	-1000887.629	-829599.4825	-1037441.351	-1072596.171	-1068646.025	-950201.8541	-808083.5425	-920688.593	-960426.2968	-933736.9423	-805732.0867	-935261.7312	-1141076.781	-1179883.426	-1173061.195
199	-660342.173	-769916.754	-863443.5889	-860368.418	-767388.2981	-924023.247	-1087136.879	-1098501.33	-1047298.807	-882644.3765	-929734.274	-1105564.416	-1113282.202	-1062319.314	-894894.1723	-890274.145	-1079029.881	-1094311.564	-1054375.775	-894594.15	-737617.9677	-819914.6061	-899232.6029	-884148.5066	-763760.2792	-956195.3153	-1120991.266	-1135492.873	-1088091.613	-925320.0858	-957522.925	-1134520.439	-1145386.969	-1098360.622	-933393.1876	-914755.0833	-1103810.714	-1121604.885	-1084918.739	-927536.6518	-814893.7582	-869912.4592	-935021.5608	-907928.5348	-760132.2603	-988367.304	-1154845.591	-1172484.415	-1128884.401
200	-610015.1319	-776868.977	-833121.219	-836861.0387	-748669.6362	-793806.009	-975170.4885	-1000669.265	-969183.1436	-821880.2093	-786624.443	-980414.9429	-1000676.142	-968946.0192	-820231.4787	-764673.7437	-969301.3686	-991226.5587	-964990.267	-821979.3963	-696940.0284	-832816.6792	-875777.9294	-863410.5789	-750091.285	-840228.5004	-1021619.572	-1048574.088	-1018785.612	-871560.9838	-829913.0916	-1023149.719	-1044963.631	-1015077.415	-866849.9623	-803940.1414	-1007270.189	-1030397.517	-1005600.829	-863043.8722	-783864.9305	-888764.3787	-918434.576	-889960.0552	-751512.935	-886650.9294	-1068068.593	-1096478.911	-1068388.081
201	-601833.1265	-749330.15	-801191.5353	-803226.8804	-713956.1175	-763111.6873	-937401.047	-949563.835	-905955.343	-746778.0522	-760419.8014	-951118.9024	-957631.7963	-912771.7395	-751221.9469	-750198.5587	-958867.0727	-969442.6266	-931842.9925	-776774.6005	-688083.7303	-810326.1413	-850702.8859	-836703.6299	-720318.9419	-812973.8779	-988559.7337	-1003550.405	-962997.5334	-805220.3088	-806286.4349	-997565.9198	-1007035.016	-965405.8525	-805866.7503	-790635.3283	-998764.112	-1011760.947	-976796.1039	-823727.8667	-774334.3362	-871322.1315	-900214.174	-870180.3168	-726681.7669	-862836.0059	-1039718.341	-1057536.974	-1020039.728
202	-608162.4376	-749610.6702	-832716.1804	-836813.8437	-747491.2499	-776138.4471	-960165.6723	-986163.1286	-952566.9827	-805305.0633	-763960.6045	-956358.8073	-978815.6104	-945857.2574	-797546.7974	-743403.3163	-942046.1795	-967951.52	-941804.2872	-799461.331	-698737.1618	-808670.3269	-876826.3869	-866101.0792	-751799.5471	-825334.5914	-1009073.684	-1036359.119	-1004526.774	-857220.8391	-810398.0001	-1002091.076	-1025854.835	-994777.9831	-846759.754	-785464.6212	-982888.5596	-1009751.207	-985092.5643	-842980.4798	-789311.8835	-867729.9842	-920936.5346	-895388.2535	-756107.8444	-874530.6631	-1057981.632	-1086555.109	-1056486.556
203	-614699.3482	-835653.4332	-917685.666	-950352.3102	-868539.6088	-764482.241	-1016625.522	-1096142.702	-1116399.124	-1034466.387	-721486.3209	-964358.898	-1043002.844	-1067167.928	-988123.6786	-668993.5443	-889253.4261	-959467.5387	-978220.4127	-899550.6602	-711772.8949	-883985.3148	-947088.0156	-956267.2099	-858504.7224	-814184.1847	-1058983.645	-1133148.42	-1148411.436	-1059631.59	-772955.8113	-1008624.306	-1081838.955	-1101002.346	-1014507.04	-720788.0962	-934864.4671	-1000275.751	-1014660.591	-928411.6999	-808846.4377	-932317.1963	-976490.2947	-962182.0631	-848469.8279	-863886.0659	-1101341.707	-1170154.154	-1180423.747
204	-576191.4959	-798899.7222	-893412.8424	-938155.8406	-781244.2484	-637847.259	-899144.2588	-992980.8366	-1041741.394	-985094.641	-580236.6663	-833818.8976	-927374.5189	-980192.8645	-931423.9307	-545243.0559	-777249.6644	-861451.8885	-905928.6794	-854640.0306	-683222.9536	-859497.4594	-934641.0726	-965079.1947	-889446.2517	-702632.646	-955888.0775	-1043252.542	-1084870.733	-1018784.187	-647418.1784	-893037.6006	-979956.3574	-1025517.032	-966576.5009	-610969.5191	-835982.4183	-914121.9088	-951961.9644	-890499.3481	-790254.4113	-920095.1966	-975869.2555	-992002.4863	-997648.2549	-767417.9653	-1012631.834	-1093524.257	-1128000.073
205	-566588.735	-781016.6341	-869534.5173	-907290.4522	-767054.0824	-621558.1586	-871933.3473	-954971.5553	-990571.5982	-918802.4498	-568554.9999	-813491.7393	-895536.3988	-934539.6883	-869161.5498	-543002.4197	-770571.2249	-844860.9713	-877627.2363	-811130.5344	-674163.6941	-844201.9146	-914122.8994	-936542.2451	-854022.8401	-688294.4243	-931765.516	-1009509.954	-1039347.52	-959666.5294	-637033.2156	-875062.7911	-951693.4295	-984866.6285	-911012.1991	-609009.5815	-830415.2522	-899746.403	-927166.563	-852176.6472	-781738.6532	-907387.1951	-958711.2308	-965793.9755	-940991.5978	-755030.6236	-991597.6222	-1064048.36	-1088123.442
206	-636450.5292	-822367.6311	-898400.9667	-909260.8305	-821593.9898	-849263.842	-1061353.861	-1102700.898	-1098107.572	-977830.0171	-832527.2204	-1047634.828	-1086286.211	-1082522.802	-962840.0526	-785631.7144	-996894.9094	-1033280.125	-1030315.541	-914682.9917	-721468.8303	-870714.5461	-928550.9924	-920684.56	-812860.0187	-889041.8684	-1098018.571	-1138171.549	-1132404.431	-1009337.904	-870988.1681	-1082710.184	-1120187.12	-1115332.319	-992852.4219	-823004.193	-1030887.57	-1066174.39	-1062117.407	-943613.7571	-806487.1357	-919061.4611	-958700.9642	-932108.2271	-804126.0476	-928819.815	-1134683.22	-1173642.218	-1166701.29
207	-570643.0476	-772826.5298	-851808.9301	-812799.7431	-791673.6091	-643201.5127	-876478.4746	-945469.2956	-959343.5266	-847372.8889	-602168.353	-834354.1135	-901434.6511	-918391.8521	-807914.3657	-584735.4117	-806996.3586	-868695.4659	-882533.6818	-775294.0368	-675186.757	-837101.1314	-905077.8643	-906795.7212	-807652.9649	-707636.8349	-935830.6597	-1001186.861	-1011572.52	-895664.4747	-666961.1196	-893891.8116	-957263.7738	-970736.7111	-856142.2789	-645935.7628	-863266.1605	-921498.6293	-932137.605	-820651.7809	-779730.4699	-901375.7366	-958346.7395	-1000791.637	-823632.3207	-772072.0911	-995182.7753	-1056904.427	-1063801.506
208	-581371.5448	-808546.4551	-906293.6058	-954805.6584	-788898.8962	-646634.1419	-913822.7301	-1013484.308	-1069344.084	-1020854.855	-586538.1459	-844784.0433	-944549.0606	-1004819.707	-965010.3313	-546451.7297	-780852.2369	-870401.5814	-921195.4197	-878110.501	-688109.8197	-867748.3853	-945709.2581	-980472.9751	-908554.8189	-710367.1599	-968900.59	-1061454.417	-1109427.47	-1050674.22	-653020.173	-902733.8111	-995202.3214	-1047445.213	-996549.7347	-612026.7746	-838985.533	-921876.5351	-965337.4293	-911171.8884	-794848.0946	-926950.3155	-985124.8651	-1006140.229	-1028210.742	-774100.1098	-1023978.387	-1109424.536	-1149510.855
209	-573814.1214	-777288.1228	-852364.2697	-875668.5318	-792670.3353	-663953.9394	-896518.6224	-959357.5515	-964906.8707	-862277.8564	-623750.0071	-852885.6739	-913571.4466	-921652.9856	-821150.4024	-601101.8634	-817487.9339	-872820.9271	-878670.2713	-780179.4416	-677156.6078	-837597.6218	-895234.7585	-897431.2886	-795641.1188	-725653.489	-953043.3489	-1012575.011	-1015099.923	-907695.7042	-686085.2501	-909973.276	-967328.9529	-972429.2018	-866853.7772	-660602.8206	-872236.2761	-924575.6536	-927767.0395	-824106.9149	-780499.0923	-897907.1209	-938105.1809	-919193.9907	-798611.8984	-787352.9762	-1009568.013	-1065792.478	-1065292.976
210	-600372.644	-848067.3524	-948388.9112	-990310.0657	-882363.5796	-688892.1835	-977293.6871	-1093157.419	-1158082.226	-1107222.095	-620553.2366	-892122.4173	-1009430.527	-1078221.411	-1031413.305	-560884.27	-796339.815	-900021.7553	-953915.334	-898652.6593	-706864.5152	-899179.5581	-977672.2361	-993691.159	-872432.6122	-747550.2037	-1024879.491	-1131510.12	-1186927.491	-1125095.14	-683526.8826	-944427.8554	-1052292.689	-1111522.137	-1052874.048	-625333.332	-851871.5191	-947115.8159	-992609.656	-925621.0349	-813356.3789	-950291.7638	-1006955.506	-997072.2049	-862501.6523	-806208.1615	-1072465.232	-1169862.821	-1215772.727
211	-606674.8592	-824198.1515	-904865.1225	-935694.2245	-853648.8476	-744751.6851	-993052.3006	-1069296.063	-1086665.941	-1000671.173	-702303.7448	-942480.1968	-1017599.516	-1038607.904	-955352.0561	-655668.5345	-875168.1086	-942461.5237	-958681.839	-876121.8302	-704978.8024	-874880.8641	-936910.8459	-944719.562	-846166.5666	-796808.383	-1038190.885	-1109483.638	-1122246.563	-1029811.336	-755905.842	-989262.1996	-1059364.23	-1075767.466	-985527.3312	-708975.6123	-922572.5155	-985418.1935	-997606.1096	-907939.9387	-803282.742	-925563.5767	-968956.4995	-953744.8514	-838684.2785	-848865.0183	-1083329.406	-1149671.227	-1157827.184
212	-594001.0551	-779513.7391	-825925.0018	-863077.0174	-777970.2161	-719315.2358	-935002.4398	-979599.6798	-972706.1278	-848079.3235	-691792.2023	-909637.2323	-949737.1034	-945169.3458	-822066.9012	-669334.7296	-882461.0372	-918048.788	-916192.0612	-798358.7194	-691755.5816	-838547.1936	-869114.3727	-886830.7346	-782522.8648	-774925.2897	-987223.6079	-1030466.765	-1022498.165	-895406.1391	-746478.1811	-960678.0725	-999532.8489	-993902.7287	-868306.9313	-720536.1986	-930052.6991	-964550.526	-961570.5151	-841117.3137	-789510.1128	-897580.6457	-912303.6823	-910584.387	-787075.5182	-830535.2812	-1039444.714	-1081333.859	-1072290.192
213	-586375.7271	-826472.504	-917002.8145	-948815.2676	-877445.8134	-672425.075	-946156.362	-1044568.883	-1087898.446	-1018331.162	-611499.366	-868763.4352	-968181.9673	-1016142.445	-951282.8431	-564428.3738	-788485.3792	-877090.6339	-915545.2819	-848278.2922	-694082.8134	-878907.2911	-947582.7919	-957014.6621	-871583.2408	-732990.9207	-997061.4751	-1087940.773	-1123917.466	-1045413.815	-675672.3516	-923654.6638	-1015398.938	-1055947.64	-981220.4263	-628935.2384	-845305.171	-927142.7235	-959138.2107	-881904.7925	-801789.9028	-931342.072	-978162.7006	-965213.9757	-865720.6806	-793556.7039	-1047966.538	-1131312.652	-1159936.498
214	-601857.9963	-857863.116	-954985.7189	-992017.3841	-924444.9857	-703830.3095	-995423.5158	-1109202.121	-1167987.229	-1114194.033	-635943.1987	-905515.2168	-1021606.621	-1086041.964	-1037942.655	-573037.0108	-800487.2002	-903258.1017	-955111.886	-902821.2176	-709060.9525	-904515.4767	-978042.4575	-991631.3867	-912219.6335	-760611.6067	-1040587.466	-1144989.091	-1194568.98	-1130007.227	-697540.0795	-956069.0908	-1062591.81	-1117717.936	-1057642.477	-636817.2965	-855297.0319	-949658.5765	-993431.9735	-929056.5484	-816263.9127	-951167.8294	-1001099.126	-991245.3028	-899994.2972	-817392.8414	-1085751.369	-1180776.044	-1221150.747
215	-670143.5381	-685662.1284	-865542.3601	-859911.3223	-763349.7235	-894349.5449	-1080193.665	-1075598.035	-1016453.617	-852537.0448	-895465.7463	-1095045.114	-1082337.969	-1021567.423	-855113.7511	-865182.3406	-1074464.762	-1067405.028	-1015273.643	-855665.5264	-770638.0927	-892604.8776	-925884.1578	-889375.5055	-764434.3695	-931401.0558	-1117039.255	-1116492.147	-1061448.129	-899095.5047	-928536.1509	-1127276.618	-1118878.751	-1062502.124	-898108.2948	-894149.4777	-1101923.122	-1098693.212	-1050492.081	-892899.728	-871132.6395	-1099547.627	-986225.9011	-918839.6262	-765519.0165	-968452.4882	-1153884.799	-1157386.259	-1106442.642
216	-595390.5347	-808089.323	-886836.414	-915081.4981	-832708.9244	-717005.869	-959902.7906	-1031543.355	-1044854.072	-953147.1305	-675328.5175	-911713.5815	-981876.4442	-998445.7728	-909267.4238	-636930.4273	-855360.8293	-918547.0547	-931205.9952	-843175.3681	-695424.7055	-862077.8586	-922599.3444	-928480.8449	-828816.209	-772373.9067	-1008951.358	-1076205.371	-1085452.579	-987877.0243	-731929.5629	-962034.5106	-1027759.463	-1040281.272	-944775.0234	-692364.4734	-905287.1317	-964524.963	-973623.4851	-879151.813	-795458.8733	-916066.3942	-958362.2063	-941880.1414	-824923.4875	-827741.8818	-1057999.862	-1120867.399	-1126051.086
217	-598811.0702	-811066.3594	-890769.46	-887539.0139	-839154.7307	-713435.5782	-959604.4955	-1036364.279	-1052449.044	-962633.2703	-670380.1871	-911191.7464	-985810.925	-1002997.098	-917797.7809	-632094.7594	-855766.0419	-921626.9718	-931727.0982	-849569.149	-699285.8003	-867111.9872	-926704.8469	-902946.3443	-836560.4356	-769494.8463	-1009108.134	-1081053.919	-1092869.143	-997097.8747	-727589.1004	-961838.2172	-1031606.26	-1044647.045	-952969.2635	-687916.5261	-905734.1748	-967248.1853	-973772.4538	-884957.5177	-799760.5304	-923157.6148	-962640.1712	-918353.606	-833966.1406	-825554.0519	-1058611.697	-1125743.571	-1133289.219
218	-590312.2571	-776526.2761	-849090.2335	-861482.4217	-775406.3969	-721683.9569	-934472.3568	-978243.4891	-971809.4269	-850465.9516	-695568.2283	-911013.3955	-951775.0444	-946338.7108	-825949.0192	-672653.6025	-884539.0025	-922984.0075	-918366.0819	-801820.8471	-686343.0646	-835505.1912	-890865.304	-884494.7211	-777636.8456	-776600.2866	-986291.3763	-1028807.029	-1021223.101	-897098.2617	-749555.1955	-961628.0503	-1001158.269	-994659.1721	-871482.9555	-723384.2646	-931894.6192	-969175.246	-963504.5332	-844102.4689	-782373.8746	-894484.1064	-932640.3168	-907506.958	-779867.2943	-831516.5444	-1038110.333	-1079370.577	-1070636.774
219	-616492.7081	-838213.5267	-920550.8761	-953628.1851	-871867.4834	-768891.7412	-1021893.803	-1102142.547	-1123044.07	-1042019.139	-725773.3555	-969248.4783	-1048680.129	-1073550.689	-995447.6728	-671971.4956	-892401.2954	-963268.1426	-982587.0076	-904786.6725	-713291.2786	-886020.0308	-949362.4691	-958847.946	-861262.1257	-818067.4307	-1063630.533	-1138437.164	-1154258.915	-1066295.995	-776766.2384	-1012951.463	-1086861.739	-1106641.984	-1020983.596	-723428.0193	-937611.5445	-1003596.205	-1018472.027	-932986.8491	-810089.845	-933826.5348	-978173.9914	-964067.6606	-850656.7598	-867243.0576	-1105367.201	-1174731.798	-1185473.759
220	-625837.1756	-817973.3858	-769225.0221	-892981.5692	-806564.3256	-775147.3335	-1002507.7	-1062730.157	-1040188.112	-904106.1802	-750407.8429	-981412.7828	-1040664.475	-1016953.365	-880662.7066	-718587.3324	-945280.3897	-999893.7555	-979153.041	-847790.236	-720514.6608	-887496.5034	-939738.1401	-931550.0503	-810799.237	-824838.5132	-1047880.607	-1105490.216	-1083132.575	-945500.5396	-798958.7753	-1025279.866	-1081857.146	-1058512.509	-920769.1797	-764249.2545	-986241.4556	-1038346.228	-1017887.9	-884992.475	-815192.1392	-957019.621	-1110251.189	-970118.462	-815034.1551	-874529.6305	-1093253.451	-1148250.275	-1126077.024
221	-605755.0957	-865764.5634	-964546.5367	-1002891.949	-936275.3217	-711735.4376	-1007824.734	-1125471.193	-1188146.673	-1138324.032	-642096.0465	-914766.144	-1035054.339	-1103636.631	-1059756.117	-575203.9228	-803508.2231	-909844.8121	-965071.3427	-916550.4197	-712831.1554	-910961.4081	-985709.5729	-1000344.891	-922448.3706	-767564.112	-1051543.554	-1159348.934	-1212352.935	-1151300.549	-703044.4865	-964228.2464	-1074470.903	-1133266.366	-1076878.955	-638801.3186	-857812.1203	-955326.1253	-1002064.184	-940925.2917	-819907.2194	-956158.2443	-1006872.538	-997797.7448	-908621.4364	-823392.724	-1095262.329	-1193226.658	-1236559.213
222	-658470.1124	-688686.6275	-858983.7596	-855061.2401	-759566.5923	-866201.9518	-1054434.117	-1054247.309	-999439.9512	-839070.2422	-863999.6669	-1064977.518	-1057084.84	-1000894.319	-838324.9174	-836851.5255	-1046422.526	-1043487.684	-995266.3715	-839263.1903	-759730.1383	-884024.9519	-918943.1456	-885180.1695	-761893.6908	-906367.9834	-1094147.456	-1097547.016	-1046391.429	-887213.0917	-900487.2654	-1100409.919	-1096344.49	-1044082.011	-883157.1385	-869082.4449	-1076984.808	-1077443.78	-1032728.689	-878324.0843	-860990.1569	-1079363.276	-978902.4764	-915299.0364	-764220.7903	-946533.9378	-1133860.748	-1140846.724	-1093342.906
223	-629954.2399	-758091.092	-845548.8559	-846650.9312	-755800.8463	-837899.5176	-1013192.607	-1033078.887	-992129.797	-837604.2501	-833192.5966	-1018671.487	-1034972.84	-994495.2601	-838201.9431	-804740.9225	-999254.6288	-1020723.215	-988817.4732	-839191.6126	-714974.9374	-813366.2708	-886183.886	-873638.2191	-756794.7029	-879985.9038	-1055813.779	-1077760.309	-1039425.925	-885661.1006	-871841.7243	-1057397.498	-1075774.993	-1038037.159	-882940.4406	-839460.1458	-1033389.231	-1056464.615	-1026782.93	-878293.6405	-799995.6317	-868641.4504	-926818.8585	-900625.4462	-757788.5596	-922072.2144	-1098434.889	-1122441.731	-1086722.04
224	-627051.276	-789468.6591	-842999.0815	-844373.8366	-755271.9823	-844882.1986	-1018986.632	-1039712.581	-1003093.473	-850241.7607	-844522.2596	-1033349.015	-1048421.874	-1011233.578	-856340.0678	-816237.4983	-1019062.412	-1036708.552	-1006060.542	-857345.1621	-708919.3542	-841830.0784	-882678.4898	-868553.4547	-753516.5045	-885258.5131	-1060087.934	-1082896.328	-1048608.919	-896476.7588	-881162.8881	-1070066.193	-1087333.665	-1052635.352	-898962.4745	-849275.7579	-1051269.148	-1070667.832	-1042009.304	-894488.7398	-790787.4393	-894191.4943	-922357.834	-892733.0086	-751761.0281	-925634.7651	-1101189.173	-1126080.076	-1094124.366
225	-576100.9697	-798731.1366	-893187.7392	-937864.8696	-781110.4763	-637693.7001	-898887.7389	-992622.5195	-1041259.011	-984469.6981	-580126.5421	-833627.2715	-927074.3779	-979762.4876	-930836.9773	-545221.9332	-777186.7061	-861295.4843	-905661.8789	-854229.8624	-683137.5511	-859353.2668	-934447.6458	-964810.1741	-889112.3117	-702497.4782	-955660.6718	-1042934.447	-1084441.582	-1018226.88	-647320.2784	-892868.1504	-979689.9201	-1025133.817	-966052.6909	-610951.0425	-835929.9361	-913986.3895	-951728.2158	-890138.0763	-790174.1324	-919975.397	-975707.5051	-991755.4162	-997114.1472	-767301.1887	-1012433.542	-1093246.385	-1127624.152
226	-582898.3742	-756813.8211	-817398.4357	-824902.7742	-738160.5551	-712507.0575	-905427.4918	-938523.2697	-915207.422	-776736.5837	-694467.3769	-896158.7636	-924678.3436	-901636.1005	-762756.7443	-682598.7257	-890095.7606	-918831.9965	-899617.922	-765687.028	-677872.3055	-818469.8787	-864794.175	-855224.5648	-744639.2974	-768553.3649	-960388.7425	-993942.7187	-971315.2824	-831902.0665	-748337.8068	-948471.8673	-977522.4361	-955295.726	-815735.8601	-731778.5703	-937236.2027	-966298.4832	-947648.7597	-812992.473	-772846.2405	-880125.9345	-912189.8509	-885546.292	-751118.0404	-824599.6098	-1015349.931	-1049362.168	-1027423.143
227	-580191.1592	-766470.3112	-838273.2103	-851001.5361	-765274.4798	-693697.4621	-906639.0621	-950941.9547	-944104.1005	-822526.8001	-665524.2906	-881043.5064	-922268.0728	-916464.7589	-795919.9892	-647870.2181	-859892.1078	-898788.9574	-893808.3474	-777062.9018	-678637.7194	-827781.5095	-882598.4027	-876555.956	-769910.1327	-751934.5979	-961782.3986	-1004816.338	-996833.8662	-872476.8712	-722917.115	-935066.9314	-975047.5674	-968187.7702	-844858.806	-701531.1912	-910179.0823	-947897.0796	-941872.3717	-822273.2272	-777084.2816	-889092.7078	-926923.5365	-902110.3134	-774545.7856	-810171.6634	-1016925.673	-1058690.728	-1049563.632
228	-595068.6419	-765450.2067	-811460.2511	-806413.0047	-714378.6986	-826627.929	-986105.4321	-982330.8929	-925690.477	-756046.4071	-829745.2674	-1007842.939	-998497.7465	-940657.5767	-767425.8186	-810596.0945	-1012999.226	-1011508.988	-963520.3957	-797286.7209	-678164.5399	-824165.0051	-860454.6715	-839499.1458	-718500.911	-869811.4038	-1032164.834	-1032826.534	-980533.178	-813337.0024	-868294.5126	-1048408.139	-1043651.329	-990355.6981	-820270.1129	-843793.1531	-1046812.381	-1049224.424	-1005069.957	-841970.1994	-761260.436	-882879.806	-909449.03	-872585.2243	-722623.1245	-912994.8161	-1078224.184	-1083322.165	-1035375.889
229	-569113.1495	-787897.1181	-873096.1852	-901929.8312	-805242.1279	-631124.1761	-884160.6892	-967315.8925	-997429.6137	-912617.5697	-577370.2934	-822585.8659	-904898.4483	-937617.8621	-855598.5175	-548860.7539	-773524.6495	-847531.6438	-872798.7668	-788024.3019	-676982.1167	-848837.1754	-914965.4552	-921252.9903	-807361.4067	-696707.4206	-942453.1599	-1020113.516	-1044686.8	-952781.3029	-645010.9014	-883016.9607	-959737.8623	-986932.2826	-897361.4776	-614493.4472	-832864.3227	-901836.1375	-922201.4913	-829904.5016	-784851.0799	-909777.2326	-956834.6667	-940576.0949	-809480.6894	-762290.6026	-1000745.568	-1072911.14	-1091943.97
230	-661568.2127	-770393.8754	-864165.5746	-860921.8674	-767855.8085	-927498.0181	-1090120.254	-1101140.882	-1049524.671	-884461.5775	-933629.3704	-1109070.222	-1116441.693	-1065055.761	-897181.4922	-893725.0913	-1082248.515	-1097280.579	-1057020.808	-896829.4356	-738531.5295	-820178.807	-899759.0699	-884572.5574	-764041.3142	-959270.0807	-1123620.934	-1137822.166	-1090055.092	-926920.1779	-960979.8417	-1137632.062	-1148195.552	-1100794.448	-935428.7676	-917792.9531	-1106651.958	-1124233.052	-1087264.302	-929523.4235	-815494.842	-869963.7396	-935352.5093	-908223.1871	-760226.8199	-991042.0634	-1157121.552	-1174503.45	-1130585.495
231	-648058.5996	-768812.7464	-809389.3097	-803063.5374	-710284.4666	-897482.4036	-1044844.427	-1033361.478	-965842.1705	-781658.9354	-918614.8034	-1092098.317	-1073419.292	-1002969.654	-813839.2474	-897152.1076	-1103102.077	-1092893.361	-1034096.492	-853423.063	-718464.6363	-822353.8908	-854534.5496	-834071.5215	-710363.816	-931305.7725	-1082957.911	-1077148.353	-1015542.825	-835614.9128	-946022.0583	-1122779.965	-1109970.32	-1045666.166	-861820.6165	-919443.4964	-1126790.129	-1121511.387	-1067840.001	-892478.7649	-788870.6764	-875895.0333	-899679.727	-865079.4431	-710443.1662	-965129.079	-1121071.305	-1120935.227	-1065243.487
232	-606743.6658	-792851.9425	-866651.4635	-878497.9389	-791855.3704	-767119.4952	-979659.1778	-1022567.007	-1016788.494	-895824.6293	-744343.9858	-959668.9366	-999679.0477	-994838.4996	-874700.5743	-712888.9525	-924552.7642	-962264.208	-958235.0937	-842014.8972	-698852.545	-848044.4406	-904286.46	-897383.1542	-790181.0161	-816644.56	-1026081.232	-1067755.456	-1060818.556	-937070.6177	-792801.6092	-1004749.518	-1043548.493	-1037634.986	-914706.7524	-758862.311	-967149.3774	-1003719.942	-998623.9332	-879541.8248	-790961.4274	-903236.9387	-941921.4001	-916268.307	-788506.6618	-866169.5501	-1072503.224	-1112943.916	-1104848.617
233	-605078.3113	-821919.0149	-902314.3542	-932777.8597	-850686.1898	-740826.1045	-988362.1854	-1063954.67	-1080750.244	-993947.296	-698487.1899	-938127.2223	-1012545.284	-1032925.617	-948831.8319	-653017.3979	-872365.7015	-939078.0162	-954794.4551	-871460.4429	-703627.0534	-873069.4475	-934886.0017	-942422.0483	-843711.7739	-793351.3029	-1034053.968	-1104775.305	-1117040.814	-1023878.315	-752513.5894	-985409.9255	-1054892.671	-1070746.748	-979761.544	-706625.407	-920126.9155	-982462.142	-994212.9592	-903866.8883	-802175.7921	-924219.8802	-967457.5798	-952066.1884	-836737.3509	-845876.4389	-1079745.688	-1145595.955	-1153331.384
234	-608193.6851	-775521.8617	-832065.1114	-836057.7958	-747963.7357	-788345.1159	-970485.8149	-996494.8861	-965557.5661	-818847.8884	-780434.2047	-974755.4113	-995571.3298	-964424.7768	-816370.8707	-759160.7218	-963981.0865	-986363.7781	-960599.1724	-818198.2085	-695659.2395	-831852.9971	-875040.1449	-862860.7201	-749725.0721	-835414.0441	-1017506.665	-1044904.47	-1015597.006	-868897.0736	-824433.6371	-1018133.569	-1040433.571	-1011061.848	-863416.6013	-799093.0109	-1002565.97	-1026091.951	-1001708.158	-859681.8936	-783124.7994	-888184.1299	-918015.1145	-889663.5804	-751486.4097	-882482.9098	-1064527.453	-1093314.054	-1065636.445
235	-582708.3738	-814066.0579	-905842.1241	-940367.7244	-838783.4071	-656248.3513	-924665.6307	-1022046.265	-1067299.851	-997254.0044	-596151.2048	-852828.3579	-950361.0215	-998768.4603	-932063.0127	-554089.9619	-783447.3081	-870360.3827	-908077.5818	-836138.2383	-689978.4212	-870731.8348	-942237.5773	-952757.4393	-835661.8526	-718819.7116	-978301.6108	-1068561.575	-1106549.416	-1027723.182	-661762.0809	-909725.4824	-999991.3485	-1041118.284	-964996.2335	-619207.8761	-841130.8382	-921528.9506	-952823.0611	-871533.0615	-797248.4631	-927397.6116	-978632.9735	-965147.1028	-832540.3036	-781391.0094	-1031937.529	-1115076.884	-1145798.959
236	-653249.4578	-847050.9565	-763240.2436	-919784.7733	-832686.9605	-837541.9386	-1069011.573	-1133278.576	-1106582.688	-966475.2697	-816624.6491	-1052165.82	-1116186.602	-1087611.846	-946817.0984	-773418.3663	-1004318.96	-1063024.601	-1038057.477	-902589.7828	-743517.7204	-915865.5983	-968073.8527	-958797.6869	-833535.5329	-880164.4924	-1106944.45	-1168214.508	-1142093.837	-1000802.217	-857902.843	-1088362.631	-1149297.656	-1121506.912	-979655.0183	-812705.724	-1038506.747	-1094325.296	-1070025.939	-933416.9348	-833785.9741	-984680.2401	-1172907.391	-997810.529	-834384.1142	-922786.9836	-1144877.264	-1203150.439	-1177604.968
237	-595470.5445	-808313.3374	-894555.8217	-819174.0427	-841082.9397	-695399.9491	-942089.3992	-1026292.562	-1055561.707	-950875.6688	-651957.2003	-895295.173	-978598.9334	-1012235.901	-909113.6698	-618381.8548	-847212.2934	-923083.5424	-950896.4455	-850768.4084	-696695.7227	-867387.9057	-946033.9798	-952035.0076	-857359.3007	-753782.5335	-994019.4557	-1073014.22	-1097177.852	-987758.6371	-711254.4793	-948040.64	-1025991.439	-1054466.764	-946310.2345	-675654.8392	-898488.5195	-969375.6344	-992490.6402	-887155.8048	-797920.9069	-926462.4799	-997512.0814	-1084895.91	-873635.6616	-812165.0496	-1045949.438	-1119735.878	-1138793.985
238	-591004.4275	-706166.4924	-821078.8217	-827030.5549	-737702.2701	-703525.0557	-905558.7483	-930852.3896	-901110.7514	-761239.8702	-682143.8283	-891204.109	-911136.2829	-881415.6661	-741295.1159	-673115.7108	-884354.5339	-905259.1951	-879635.8488	-744467.1229	-696688.4363	-834437.9169	-878828.0876	-860933.5408	-747210.0296	-761691.2249	-961846.0269	-988055.0584	-959372.3613	-818539.58	-738380.8423	-945135.8532	-966109.4259	-937624.3533	-796748.0559	-724209.4149	-932855.6987	-954634.2904	-930066.4973	-794085.2483	-802372.4418	-962709.3415	-936577.2945	-894836.4641	-756717.7895	-819857.3248	-1018133.25	-1045257.727	-1017633.971
239	-585900.4951	-820210.4531	-913530.7806	-949392.836	-846658.8073	-662147.4386	-934176.0796	-1034896.806	-1083705.19	-1017126.407	-600560.9112	-859929.2119	-961035.5087	-1013126.453	-950016.6659	-555317.7655	-785777.1211	-875720.5079	-916360.9506	-847435.2583	-693029.9178	-875872.6406	-948640.9966	-960154.5973	-842306.7195	-724011.6168	-986718.7286	-1079937.045	-1121074.588	-1045319.33	-665695.2118	-915996.5698	-1009442.756	-1053841.008	-980876.6882	-620314.8111	-843071.7934	-926152.769	-960012.9215	-881307.3329	-800159.3346	-931534.8281	-983751.156	-970916.3079	-837954.6376	-785875.7324	-1039261.315	-1124977.285	-1158443.962
240	-685677.5428	-681637.3816	-874269.9893	-866365.4003	-768383.9936	-931805.9744	-1114472.286	-1104009.772	-1039093.96	-870457.5234	-937338.1361	-1135056.521	-1115942.691	-1049077.438	-877454.9072	-902882.5866	-1111780.991	-1099232.2	-1041897.624	-877492.3641	-785153.4734	-904022.315	-935120.6682	-894958.3028	-767815.2892	-964712.9454	-1147501.72	-1141702.72	-1081484.309	-914907.6121	-965861.2287	-1163028.543	-1148865.434	-1087014.048	-918004.0254	-927506.5589	-1135108.915	-1126970.153	-1074130.098	-912295.7584	-884629.3951	-1126407.248	-995971.2935	-923551.1428	-767246.5859	-997619.8361	-1180531.108	-1179395.669	-1123874.658
241	-600643.719	-848589.1348	-949041.8323	-991076.4786	-883032.3589	-689393.1342	-978101.3149	-1094248.687	-1159475.368	-1108909.66	-620927.709	-892725.4221	-1010337.005	-1079440.693	-1032937.93	-560988.5352	-796537.6628	-900476.9374	-954618.7581	-899612.0027	-707123.6484	-899616.1156	-978216.0148	-994319.326	-872996.8946	-747991.1005	-1025594.273	-1132476.125	-1188160.97	-1126589.406	-683860.8842	-944960.3964	-1053095.303	-1112602.552	-1054222.617	-625427.3329	-852036.3451	-947508.4708	-993220.2193	-926451.0665	-813603.5702	-950643.0964	-1007390.142	-997562.1261	-862961.4378	-806589.0044	-1073087.168	-1170703.564	-1216846.541
242	-634813.4419	-819600.3705	-851016.5346	-903819.2807	-818054.6533	-823577.8214	-1040666.65	-1083816.691	-1078136.764	-952150.5565	-802876.8858	-1022081.986	-1059978.197	-1057392.479	-933022.6741	-760829.5691	-974287.6095	-1006213.063	-1007615.663	-889659.4055	-724606.532	-869847.3559	-885524.6327	-918462.1059	-815094.8138	-867098.3798	-1080585.758	-1122365.299	-1115641.602	-987399.9306	-845155.208	-1060517.682	-1097206.751	-1093535.185	-966863.5832	-801266.5497	-1010950.371	-1041891.548	-1042089.807	-921663.8062	-814399.6298	-920094.3374	-920032.6703	-933104.8646	-812134.9821	-910618.8757	-1120504.803	-1160913.923	-1153146.425
243	-605115.425	-819879.8618	-900692.1125	-895753.4503	-850863.1176	-727766.1025	-977113.6212	-1056808.975	-1075312.343	-988703.4619	-684168.3773	-927418.3229	-1005095.2	-1024690.196	-943013.0445	-641535.9791	-866284.9867	-934580.2233	-946314.5411	-867624.7014	-704717.796	-874377.4809	-934677.7023	-909042.833	-846496.5691	-782140.9911	-1024593.084	-1099134.04	-1113060.219	-1020184.811	-739850.0417	-976224.2762	-1048703.113	-1063848.135	-975330.5363	-696270.3222	-914922.9581	-978568.1518	-986475.3943	-900755.5785	-804320.1669	-928875.1	-968663.2296	-922332.1466	-842130.0206	-836515.8171	-1072072.471	-1141459.118	-1150808.069
244	-639338.2118	-765137.3747	-807842.808	-803094.3519	-710977.1198	-872133.5067	-1024575.344	-1017553.139	-954544.5823	-775078.6928	-888771.4796	-1065502.696	-1051576.1	-985953.9106	-802026.5583	-869429.4723	-1075892.292	-1069604.508	-1014806.475	-838963.4097	-712733.3097	-820084.8682	-853811.7102	-834568.0661	-712241.8402	-908982.5828	-1065149.792	-1063264.176	-1005630.21	-829881.0022	-919661.0773	-1099158.465	-1090551.682	-1030525.141	-851264.9774	-895143.9685	-1102638.153	-1100807.08	-1050664.664	-879508.9789	-786128.4108	-875032.3601	-899780.5499	-866041.7177	-713506.5614	-945831.5964	-1105724.152	-1108975.212	-1056715.844
245	-586923.8759	-827583.8867	-918347.5969	-950344.8359	-879109.8163	-673536.9754	-947900.6627	-1046857.219	-1090733.985	-1021725.181	-612364.7984	-870064.6298	-970073.464	-1018617.233	-954351.0286	-564733.1621	-788910.3029	-878017.0916	-916946.1351	-850209.3812	-694613.1135	-879813.9473	-948661.2145	-958240.2652	-873021.9699	-733968.8294	-998602.5102	-1089960.566	-1126418.879	-1048408.839	-676446.5772	-924802.2946	-1017069.799	-1058134.614	-983926.1444	-629214.3021	-845658.9322	-927939.8959	-960352.3793	-883574.1976	-802302.3542	-932044.0017	-978974.7634	-966135.6133	-866934.136	-794400.6209	-1049304.308	-1133063.9	-1162103.785
246	-570613.7699	-771646.4694	-846388.7072	-850798.5487	-786786.9766	-649339.868	-881291.9497	-944921.8953	-950189.0476	-846029.8996	-608710.1587	-838615.6199	-899558.7235	-905971.0245	-805018.221	-589867.2967	-808718.2703	-863691.349	-866482.2763	-768812.6165	-674990.2749	-834615.8293	-891044.8933	-875678.7602	-792119.3868	-712932.8104	-939849.0561	-1000187.498	-1002561.118	-893837.6219	-672749.9524	-897494.1186	-955137.6751	-958766.9004	-852954.6634	-650552.7508	-864635.7771	-916617.7072	-916956.3894	-814298.0011	-779366.7798	-897585.1891	-935701.0169	-900558.9058	-797451.7971	-776525.6901	-998406.0932	-1055453.108	-1054933.175
247	-601342.0731	-816705.718	-904665.1611	-820681.5197	-852767.8991	-707744.5124	-957605.9218	-1045406.697	-1078316.63	-975353.3489	-663731.9129	-909707.3054	-996847.7439	-1034429.359	-933046.5941	-626339.0022	-856723.0794	-935945.9402	-967063.7586	-868617.5669	-701782.442	-874550.515	-955719.8133	-962733.7809	-869114.4998	-764695.667	-1007780.697	-1090000.886	-1117422.912	-1009538.259	-721729.5476	-960846.4574	-1042245.049	-1074268.333	-967634.3223	-682683.1919	-906818.3598	-980698.2097	-1006763.709	-902883.5391	-802222.8174	-932395.3184	-1006774.41	-1104785.98	-885461.1004	-821646.7525	-1057955.397	-1134595.075	-1156529.18
248	-659048.0148	-773444.4425	-811338.208	-803024.705	-709411.5866	-929427.0327	-1070387.484	-1053283.115	-980079.3685	-789951.3439	-956223.3003	-1125614.066	-1100946.038	-1024412.86	-828725.5746	-932088.117	-1137391.793	-1122241.928	-1058405.733	-871645.0892	-725687.2425	-825213.3084	-855445.4703	-833445.7771	-707997.1336	-959437.4116	-1105399.666	-1094645.165	-1028034.683	-842840.7756	-979242.114	-1152547.733	-1134441.65	-1064746.856	-875122.8117	-950065.7129	-1157226.401	-1147602.913	-1089484.327	-908823.2632	-792326.474	-876982.1724	-899552.6702	-863866.7867	-706582.6816	-989447.728	-1140411.756	-1136007.214	-1075990.005
249	-546416.0598	-809733.4624	-835397.8535	-812352.1347	-714138.7042	-1015874.005	-1111938.207	-1063149.005	-975099.8399	-779825.7831	-1048541.207	-1160514.181	-1102437.561	-1012244.461	-810634.1579	-1023479.456	-1167790.171	-1121187.727	-1045439.71	-852317.1518	-807685.315	-886684.5765	-884017.4877	-844068.3193	-711695.5572	-1040304.631	-1144903.982	-1104819.716	-1024285.174	-834084.6673	-1065752.951	-1185617.038	-1136693.23	-1054311.203	-858747.068	-1034926.766	-1185346.234	-1147058.362	-1078159.105	-891075.8051	-1068954.57	-963635.6907	-932637.0574	-875784.4412	-709252.4092	-1064735.229	-1177869.694	-1146490.443	-1073470.507
250	-590534.6849	-762461.5244	-821826.1058	-828270.3237	-741120.0022	-735401.537	-925067.7157	-956024.1131	-930407.4465	-789449.4145	-720419.5943	-919886.0237	-946079.973	-920591.1488	-778942.1207	-705711.7521	-912400.7367	-939218.9239	-918027.333	-781539.44	-683241.9393	-822510.0604	-867887.2941	-857529.8163	-746174.6237	-788737.6956	-977631.8674	-1009327.379	-984683.333	-843070.3566	-771310.1042	-969501.7886	-996514.453	-972130.7605	-830130.0281	-752099.8854	-956958.3718	-984349.3189	-963968.5575	-827087.3748	-775949.1978	-882558.5942	-913948.4188	-886789.2454	-751229.2461	-842073.7917	-1030195.957	-1062630.645	-1038959.22
251	-599983.3878	-847318.0878	-947451.335	-989209.5184	-881403.2313	-688172.8323	-976133.9564	-1091590.388	-1156081.713	-1104798.799	-620015.5047	-891256.5193	-1008128.85	-1076470.558	-1029223.986	-560734.5482	-796055.7111	-899368.1267	-952905.2369	-897275.0691	-706492.4072	-898552.6739	-976891.3853	-992789.1289	-871622.3186	-746917.0883	-1023853.084	-1130122.963	-1185156.251	-1122949.417	-683047.2656	-943663.1415	-1051140.158	-1109970.693	-1050937.541	-625198.3492	-851634.8336	-946551.9746	-991732.9044	-924429.133	-813001.4191	-949787.2601	-1006331.381	-996368.692	-861841.4133	-805661.2818	-1071572.149	-1168655.539	-1214230.76
252	-664043.2823	-775549.7921	-812224.0848	-803007.0536	-709014.8166	-943947.5478	-1081998.148	-1062338.548	-986550.9242	-793720.68	-973318.3414	-1140848.737	-1113458.393	-1034159.926	-835492.1937	-947968.3719	-1152978.274	-1135582.396	-1069455.563	-879927.9591	-728970.2972	-826513.0642	-855859.5318	-833161.3434	-706921.3519	-972224.722	-1115600.625	-1102598.387	-1033712.89	-846125.3105	-994342.3775	-1166078.75	-1145565.157	-1073420.034	-881169.3595	-963985.1219	-1171061.288	-1159462.885	-1099322.812	-916252.6978	-793897.3159	-877476.3343	-899494.9162	-863315.5705	-704827.8882	-1000501.834	-1149203.009	-1142858.226	-1080874.863
253	-540740.966	-768150.9841	-813788.1696	-808194.176	-716563.5775	-805739.3274	-956814.6737	-952711.0069	-901803.0935	-740514.9766	-805573.642	-966152.2461	-955520.2546	-904033.7092	-740024.2512	-795141.4219	-971423.3221	-965784.2095	-922378.0571	-764566.8906	-730953.2564	-842733.691	-865810.1369	-842422.0078	-722536.6829	-853034.9143	-1007211.765	-1007117.735	-959683.9911	-799798.4935	-848813.4485	-1012020.64	-1005650.378	-957839.1715	-795749.1679	-832558.6566	-1010514.625	-1008717.468	-968485.5083	-812559.2976	-921165.5468	-917316.3978	-917832.0407	-876649.7771	-728509.7878	-900330.4567	-1057608.793	-1061524.473	-1017564.889
254	-605655.113	-858235.3799	-961112.4533	-1005245.235	-895396.1538	-698654.2642	-993032.0151	-1114423.085	-1185230.536	-1140107.859	-627850.6214	-903873.2368	-1027095.159	-1101981.677	-1061123.835	-562916.096	-800195.2966	-908891.9368	-967623.0334	-917347.4872	-711914.272	-907686.7999	-988268.9087	-1005932.316	-883428.8434	-756142.007	-1038808.524	-1150334.772	-1210964.414	-1154214.054	-690035.6084	-954805.5392	-1067933.313	-1132576.286	-1079153.755	-627165.1388	-855083.5008	-954767.5231	-1004507.767	-941795.9485	-818173.4228	-957138.2199	-1015425.31	-1006619.351	-871461.5411	-813629.6873	-1084584.971	-1186246.459	-1236698.26
255	-570658.9171	-772783.9413	-847323.2716	-869905.0177	-786815.3339	-656195.9457	-887249.7046	-948801.5357	-953215.8749	-848989.6826	-616207.4773	-844283.036	-903582.9363	-910423.2723	-808264.7015	-595862.5107	-811949.6305	-866134.2144	-870987.7644	-770967.2979	-674485.1916	-834017.7799	-891233.1268	-892890.7891	-790789.794	-718821.3774	-944867.6994	-1003270.091	-1004811.976	-895970.4723	-679381.2547	-902360.1555	-958491.9601	-962506.9249	-855459.0449	-655958.1884	-867403.1186	-918733.7079	-921061.2699	-816057.4815	-778311.4643	-895251.6185	-935142.9159	-915876.5051	-794764.2505	-781446.7466	-1002485.632	-1057738.654	-1056408.077
256	-653789.2687	-771228.0449	-810405.605	-803043.2874	-709829.2844	-914140.6239	-1058164.408	-1043750.048	-973266.4664	-785983.1918	-938226.5705	-1109575.832	-1087773.711	-1014151.679	-821602.0458	-915370.2481	-1120983.194	-1108197.808	-1046773.074	-862925.3341	-722231.0211	-823844.9962	-855009.569	-833745.2135	-709129.6581	-945975.6264	-1094660.651	-1086272.445	-1022056.976	-839382.9958	-963345.3775	-1138303.014	-1122731.427	-1055616.206	-868757.3349	-935412.116	-1142661.784	-1135117.38	-1079126.905	-901001.9583	-790672.7771	-876461.9456	-899613.4705	-864447.0771	-708430.0327	-977810.5664	-1131156.803	-1128794.842	-1070847.492
257	-606528.9779	-748974.9987	-831754.2747	-836076.4799	-746868.3831	-771508.9897	-956190.9042	-982646.4392	-949601.4518	-802883.996	-758771.1453	-951688.0027	-974606.2031	-942211.4728	-794499.3881	-738805.6008	-937757.9753	-963995.884	-938280.2949	-796483.2472	-697520.0183	-808318.3305	-876124.9719	-865536.1138	-751425.1226	-821238.0639	-1005570.161	-1033255.788	-1001910.82	-855089.0273	-805792.3302	-997945.4432	-1022112.943	-991535.382	-844047.739	-781417.25	-979103.1539	-1006249.686	-981967.5574	-840333.4924	-788511.0561	-867661.6629	-920495.6101	-894995.6864	-755981.8621	-870967.0658	-1054949.356	-1083865.136	-1054220.179
258	-590362.9332	-834556.6444	-926784.6924	-959941.2685	-889549.6842	-680512.9813	-958844.3144	-1061214.12	-1108524.007	-1043019.082	-617794.4767	-878228.2575	-981940.6162	-1034143.927	-973600.6651	-566645.388	-791576.2526	-883829.6387	-925735.0158	-862324.9336	-697940.189	-885502.2619	-955427.1823	-965929.6353	-882048.4814	-740104.1782	-1008270.884	-1102632.638	-1142112.612	-1067199.469	-681304.0285	-932002.4711	-1027552.693	-1071855.573	-1000901.68	-630965.1339	-847878.4119	-932941.3144	-967970.0103	-894047.9587	-805517.4481	-936447.8727	-984069.603	-971917.9197	-874547.2919	-799695.3126	-1057697.405	-1144051.142	-1175701.23
259	-628950.9341	-790305.828	-823861.9965	-808056.0352	-711623.5086	-971486.6978	-1100773.69	-1068854.292	-985472.6919	-789625.3195	-997248.4945	-1154298.578	-1115593.251	-1029673.335	-827463.6721	-963965.7492	-1160661.889	-1135515.768	-1064469.651	-871155.3043	-697382.0215	-841676.6224	-869011.8285	-838913.4939	-709378.4833	-997882.6972	-1133364.521	-1109095.746	-1033109.232	-842619.6164	-1016682.568	-1178743.269	-1147909.109	-1069640.105	-873876.5638	-978346.7053	-1177880.544	-1159505.74	-1094991.111	-908140.5198	-765813.1059	-893047.4208	-914161.599	-869770.8901	-707133.4595	-1024278.634	-1165955.306	-1149337.184	-1080745.788
260	-577302.5989	-803660.6835	-892821.5831	-925083.931	-825446.6205	-646258.3994	-908559.9312	-1000284.206	-1039517.832	-963600.6048	-588683.481	-840803.2451	-932284.0532	-974453.5713	-901658.9648	-552010.7081	-779501.8301	-861283.1493	-894049.9108	-817007.0269	-684810.7906	-862026.0129	-931393.5522	-940230.5433	-824408.9422	-710027.3544	-964047.4394	-1049297.509	-1081951.412	-997924.5616	-655101.4254	-899105.5578	-983985.6335	-1019572.679	-938103.0937	-617333.3104	-837843.8809	-913698.6337	-940647.2183	-854980.5854	-792318.9775	-920391.3423	-969965.4637	-955377.103	-823371.2689	-773796.2469	-1019534.885	-1098310.811	-1124384.972
261	-608355.9816	-871037.9118	-970927.3326	-1010149.527	-944170.7718	-717011.2425	-1016101.185	-1136329.012	-1201600.889	-1154428.156	-646202.3967	-920940.1221	-1044029.214	-1115379.139	-1074314.208	-576650.0986	-805524.4241	-914240.718	-971718.1863	-925713.1544	-715347.3519	-915263.3594	-990826.5304	-1006160.198	-929274.9293	-772204.1458	-1058855.54	-1168932.553	-1224221.772	-1165511.503	-706718.0736	-969673.5868	-1082398.893	-1143643.236	-1089717.191	-640125.4354	-859490.6656	-959108.5918	-1007825.236	-948846.3745	-822338.7265	-959488.7983	-1010725.657	-1002170.78	-914379.1044	-827396.9867	-1101609.85	-1201536.076	-1246842.672
262	-567914.9033	-789042.8126	-871712.5733	-897301.7167	-821404.7108	-634977.948	-887410.9525	-967501.1865	-992401.7928	-904025.7233	-582352.9093	-824941.1663	-904479.2172	-932795.3148	-847950.9938	-554163.5652	-774174.5892	-845888.9409	-868366.6612	-783242.1323	-676223.1067	-848372.4776	-911263.147	-915738.2029	-823129.0205	-700056.4322	-945161.7419	-1019917.222	-1039673.668	-944545.9079	-649597.6033	-885004.191	-959126.8703	-982293.6735	-890095.9282	-619536.7914	-833391.027	-900295.1607	-918246.8462	-825681.7515	-784531.3121	-907702.1385	-950813.6542	-934174.6147	-824853.3382	-765134.8539	-1002912.477	-1072333.25	-1086945.552
263	-563258.7174	-779602.3019	-860289.476	-884308.9773	-807270.033	-625533.0397	-872594.1948	-948063.1847	-968315.6423	-875195.6241	-575001.5947	-813888.3208	-888412.1198	-911773.5152	-821888.6515	-551574.5768	-770565.1241	-838019.2549	-856467.2772	-766838.7226	-671718.5344	-840670.9918	-902102.612	-905327.4611	-810907.9049	-691749.7008	-932071.5997	-1002760.333	-1018425.711	-919105.0208	-643021.0345	-875255.775	-944933.9385	-963716.682	-867112.522	-617166.3166	-830386.0436	-893523.6728	-907933.2329	-811501.1852	-780178.3532	-901739.6783	-943915.6822	-926345.8721	-814545.7837	-757966.2995	-991548.9489	-1057457.475	-1068535.787
264	-621071.8012	-844906.1067	-938634.9386	-825747.0001	-892032.1335	-749225.1723	-1009745.117	-1109634.721	-1154778.568	-1057604.158	-703297.7387	-958135.4871	-1058168.074	-1109004.641	-1013466.894	-653076.9039	-888681.5752	-979166.6467	-1021389.764	-928594.9714	-718875.0247	-898618.5804	-988266.5104	-998684.196	-908614.7559	-801366.3829	-1054021.731	-1147080.11	-1185451.112	-1082722.954	-756928.2607	-1003877.04	-1096861.031	-1140806.3	-1039288.313	-706300.1235	-934808.5985	-1018744.747	-1054724.604	-955732.4554	-816678.2567	-952331.0625	-1037898.028	-1171621.329	-925197.3783	-853507.5225	-1098298.266	-1184525.499	-1216123.638
265	-602428.0045	-793142.114	-774335.8226	-870092.5304	-784256.4702	-721864.4301	-945715.6193	-1002484.171	-983489.3673	-850845.0663	-693860.9077	-920992.0586	-976171.1084	-956613.388	-824169.0714	-671763.4656	-894863.4279	-945982.1273	-928850.625	-800993.258	-700870.8182	-863270.2463	-915540.3903	-908281.481	-791383.2015	-777591.9797	-997442.0631	-1051925.772	-1032781.631	-898274.7588	-748622.5153	-971409.2972	-1024265.208	-1004717.398	-870482.6454	-722869.0522	-941608.647	-990541.9789	-973363.7613	-843639.6079	-799313.6268	-933398.3786	-1056744.89	-946470.364	-798509.938	-833319.4669	-1049168.444	-1101367.372	-1082073.885
266	-590811.267	-742858.3491	-822498.4876	-828981.3118	-740874.9443	-726962.7589	-917944.3184	-948807.6439	-921066.0937	-779587.6539	-708836.3843	-906743.9145	-934101.8387	-907130.4796	-765176.1674	-694564.8009	-896495.4006	-925933.3944	-904371.2286	-767827.1005	-685808.2443	-804931.3005	-869375.7152	-860099.8224	-747822.2809	-781819.868	-971858.0661	-1003394.469	-976739.2096	-834576.0012	-761474.9909	-958054.738	-986107.174	-960333.9596	-817951.7986	-742472.0523	-942678.6789	-972556.8402	-951897.6664	-814863.2699	-780805.2196	-867004.2523	-916252.8832	-891218.2714	-754769.6174	-836676.9069	-1025771.751	-1057981.295	-1032412.318
267	-630129.6601	-854849.8192	-940062.9236	-928346.4511	-897319.3136	-784626.3388	-1046585.819	-1137928.844	-1166028.672	-1092144.007	-738876.7562	-991801.6598	-1081610.781	-1110763.436	-1043061.432	-678996.5753	-908021.7489	-985975.7565	-1004194.171	-939264.9955	-726270.7098	-903205.295	-966312.1655	-933232.3032	-885920.8696	-832317.9955	-1086033.819	-1170871.817	-1193173.781	-1111788.482	-788498.6472	-1033304.862	-1116539.506	-1140033.66	-1064054.942	-729416.2705	-951381.9442	-1023483.185	-1036877.751	-963438.6629	-822411.7595	-951560.7707	-992561.345	-938118.0838	-874522.4256	-880009.5896	-1125481.738	-1203814.809	-1220318.854
268	-603574.4321	-817725.5502	-898266.6879	-893745.5703	-848001.2004	-724263.2482	-972833.8115	-1051811.615	-1069723.796	-982331.0445	-680798.0875	-923452.0107	-1000381.485	-1019387.685	-936849.5998	-639228.2327	-863713.8086	-931414.02	-942748.8874	-863211.327	-703390.0365	-872601.5538	-932728.8726	-907552.6495	-844067.8493	-779049.8549	-1020808.05	-1094714.66	-1108124.852	-1014541.6	-736853.062	-972707.8474	-1044524.076	-1059154.754	-969864.7014	-694228.378	-912676.9154	-975801.1775	-983370.3754	-896894.0097	-803205.6408	-927477.5574	-967190.9948	-921359.6596	-840134.4982	-833836.399	-1068782.213	-1137617.718	-1146525.883
269	-599435.2874	-813863.3706	-893298.6233	-922469.9226	-840214.6294	-726951.0779	-971784.8992	-1045075.434	-1059841.116	-970181.6459	-684997.5165	-922741.5655	-994681.0202	-1012841.485	-925785.9969	-643646.9135	-862460.5494	-927118.9557	-941054.4352	-854984.6962	-698849.2755	-866666.9672	-927729.1582	-934301.4498	-835035.2703	-781132.1991	-1019431.972	-1088133.631	-1098641.012	-1002907.957	-740523.6191	-971794.002	-1039087.874	-1053000.941	-959382.2784	-698318.5691	-911482.9037	-972013.9314	-982219.8157	-889470.6273	-798263.2603	-919470.5638	-962159.6242	-946132.9274	-829855.9047	-835313.2577	-1067078.982	-1131191.841	-1137440.909
270	-598044.1775	-809994.2417	-889562.4198	-886539.7695	-837730.4649	-711692.3428	-957474.5994	-1033877.286	-1049667.84	-959461.9641	-668702.9239	-909217.8659	-983465.0911	-1000358.243	-914730.4723	-630946.2831	-854486.4658	-920051.2746	-929952.61	-847372.7829	-698625.0257	-866228.1768	-925734.9895	-902204.7374	-835351.7555	-767956.5071	-1007224.468	-1078854.564	-1090413.002	-994289.4663	-726097.6192	-960088.2262	-1029526.515	-1042311.33	-950249.1283	-686900.3293	-904616.4061	-965871.1689	-972227.2057	-883035.764	-799205.8738	-922462.1119	-961907.4968	-917869.6368	-832973.0461	-824220.6089	-1056974.262	-1123831.854	-1131158.139
271	-604316.9726	-820957.8457	-909787.2122	-821445.306	-858688.2621	-713999.0738	-965467.6047	-1055091.165	-1089845.759	-987755.3389	-669697.7506	-917009.4321	-1006093.782	-1045674.014	-945172.5753	-630370.6123	-861541.8642	-942462.8703	-975255.1745	-877661.1153	-704359.7059	-878179.5602	-960627.2886	-968154.4777	-875070.4507	-770224.9725	-1014753.04	-1098607.439	-1127680.38	-1020573.237	-727036.9008	-967334.7202	-1050480.188	-1084301.1	-978438.4967	-686244.2141	-911038.8005	-986434.9652	-1013995.377	-910852.2356	-804402.446	-935401.2816	-1011467.309	-1114863.587	-891452.6393	-826450.802	-1064038.399	-1142123.713	-1165514.987
272	-608282.0733	-794380.4498	-868295.6518	-880091.0342	-793395.4225	-771373.4442	-983889.8404	-1026716.842	-1020999.705	-900071.3821	-748910.6663	-964224.3617	-1004164.109	-999379.3423	-879264.9888	-716656.0286	-928299.0938	-965941.8572	-961967.8709	-845778.1065	-700023.758	-849218.4407	-905543.0296	-898589.847	-791355.477	-820393.7463	-1029806.598	-1071402.042	-1064525.721	-940813.0707	-796850.5991	-1008786.81	-1047517.322	-1041658.641	-918753.6249	-762183.9796	-970450.1404	-1006954.224	-1001912.023	-882859.8709	-791765.4458	-904056.4316	-942790.3511	-917088.5973	-789315.5315	-869413.9734	-1075723.294	-1116087.255	-1108051.736
273	-615023.8218	-836116.6323	-918204.0699	-950945.0159	-869141.7229	-765280.0542	-1017578.715	-1097228.257	-1117601.398	-1035832.91	-722261.9763	-965243.5723	-1044030.038	-1068322.764	-989448.8127	-669532.3466	-889822.9718	-960155.184	-979010.463	-900498.0147	-712047.6169	-884353.457	-947499.5336	-956734.1439	-859003.6208	-814886.7824	-1059824.409	-1134105.315	-1149469.423	-1060837.384	-773645.2339	-1009407.221	-1082747.73	-1102022.728	-1015678.847	-721265.7388	-935361.4972	-1000876.522	-1015350.196	-929239.484	-809071.408	-932590.2817	-976794.9268	-962523.2252	-848865.5107	-864493.4481	-1102070.041	-1170982.389	-1181337.448
274	-571434.4902	-757769.9947	-828914.434	-841933.5825	-756508.4501	-669483.837	-882557.984	-927320.9502	-920133.7393	-798354.1357	-639530.5872	-855113.8691	-896738.9468	-890618.1254	-769939.1838	-626427.8908	-838567.87	-877855.6509	-872561.25	-755642.5842	-671971.1347	-821099.0602	-875445.9654	-869687.4187	-763225.0607	-730594.0997	-940577.4852	-984059.8407	-975732.5535	-851174.6993	-699870.1239	-912086.5267	-952456.859	-945284.9878	-821823.8679	-682624.1385	-891391.025	-929487.4306	-923156.4498	-803386.7936	-772507.7807	-884428.1257	-921977.4375	-897441.1925	-769941.6714	-791704.2936	-998596.9239	-1040798.737	-1031331.368
275	-601369.672	-816624.7827	-896389.1456	-926003.4031	-843804.1987	-731707.3289	-977467.4638	-1051547.089	-1067008.602	-978328.3255	-689621.6714	-928015.6487	-1000804.751	-1019726.169	-933685.9296	-646859.0425	-865855.9583	-931218.4284	-945764.407	-860632.4538	-700487.0605	-868861.6876	-930182.4684	-937085.1277	-838009.5081	-785320.8127	-1024444.278	-1093838.267	-1104948.321	-1010096.432	-744633.6875	-976461.4345	-1044505.635	-1059084.066	-966368.1319	-701166.0884	-914446.0036	-975595.4966	-986330.9719	-894405.5533	-799604.4457	-921098.5924	-963975.7221	-948166.803	-832214.8109	-838934.2339	-1071421.03	-1136129.459	-1142888.04
276	-586712.1278	-827154.5632	-917828.1119	-949753.9687	-878467.0175	-673107.452	-947226.8451	-1045973.242	-1089638.626	-1020414.083	-612030.4847	-869561.9826	-969342.785	-1017661.23	-953165.7986	-564615.4234	-788746.1563	-877659.204	-916404.9901	-849463.4078	-694408.2603	-879463.709	-948244.6234	-957766.8188	-872466.1936	-733591.0665	-998007.2134	-1089180.327	-1125452.591	-1047251.871	-676147.4964	-924358.9686	-1016424.351	-1057289.793	-982880.9344	-629106.5007	-845522.2754	-927631.9508	-959883.3499	-882929.3119	-802104.3959	-931772.8486	-978661.0662	-965779.5877	-866465.3822	-794074.6186	-1048787.532	-1132387.399	-1161266.569
277	-586982.8618	-741368.5003	-820244.0306	-827253.1226	-739415.1062	-716112.5133	-908628.4944	-940565.4373	-914115.6596	-773913.301	-696673.6398	-895796.7617	-924236.0813	-898585.7075	-758033.8314	-683788.95	-886444.964	-916662.4111	-896111.9059	-760847.2456	-682955.5759	-804106.3125	-867731.7806	-858775.6902	-746944.727	-772218.6717	-963646.7201	-996121.0675	-970608.0925	-829579.5881	-750680.497	-948338.4513	-977337.1516	-952734.1449	-811595.54	-732986.0654	-933806.6713	-964350.1829	-944573.462	-808659.4191	-778928.2882	-866844.1251	-915219.4707	-890298.1962	-754474.3477	-828324.7604	-1018664.883	-1051676.698	-1027100.518
278	-618743.4991	-841578.1833	-934626.1705	-825149.2235	-887398.5674	-744330.0462	-1003592.179	-1102055.182	-1145755.307	-1047897.753	-698628.5818	-952420.485	-1050931.672	-1100204.024	-1003976.507	-649921.5683	-884910.1582	-974066.178	-1014978.761	-921517.0474	-716857.9318	-895778.3118	-984425.6798	-994441.6932	-903953.3369	-797038.8775	-1048564.834	-1140344.2	-1177423.115	-1074086.44	-752774.4661	-998799.0079	-1090415.808	-1132954.165	-1030832.437	-703513.0932	-931505.4749	-1014254.881	-1049064.746	-949495.7631	-814972.3726	-949978.4485	-1034225.135	-1163734.1	-920508.1064	-849747.638	-1093537.41	-1178633.217	-1209090.906
279	-582773.0219	-756430.2953	-806959.7542	-805816.7617	-715378.5356	-774059.8097	-944493.2142	-950932.2252	-903995.9767	-743860.8812	-768959.6505	-954695.3279	-956004.6997	-908354.451	-745638.549	-754939.4409	-959413.5951	-966507.8927	-926886.6971	-770480.3871	-671190.6655	-817810.1755	-857349.3458	-839711.6742	-721811.3691	-823335.3286	-995440.2557	-1005149.031	-961453.7373	-802710.5697	-814445.6425	-1001110.535	-1005816.992	-961584.0042	-800816.7493	-794964.7167	-999248.7651	-1009204.192	-972438.2709	-817957.5053	-759608.3076	-879190.0578	-907738.8754	-873606.5243	-728244.2033	-872610.785	-1046387.243	-1059365.829	-1018911.506
280	-675229.5029	-684344.3922	-868399.8599	-862024.4422	-764997.9862	-906613.0974	-1091416.776	-1084900.279	-1023866.257	-858404.3614	-909175.1216	-1108145.188	-1093340.44	-1030574.435	-862428.435	-877525.7207	-1086682.412	-1077825.514	-1023990.56	-862811.8181	-775390.5514	-896343.0434	-928908.2696	-891203.3607	-765541.3113	-942307.6508	-1127012.924	-1124746.302	-1068008.144	-904272.5227	-940756.6977	-1138982.101	-1128696.645	-1070527.536	-904622.3256	-905070.8688	-1112788.431	-1107951.322	-1058231.368	-899250.1527	-875551.5917	-1108341.694	-989416.6252	-920382.2167	-766084.6374	-978002.1252	-1162609.027	-1164592.326	-1112150.032
281	-571610.8498	-774142.8636	-848844.1527	-871643.8836	-788581.8017	-658536.5508	-890046.1591	-951986.3108	-956743.0762	-852998.7563	-618483.0765	-846878.4723	-906596.4937	-913811.3036	-812152.3481	-597443.2359	-813620.5498	-868151.6115	-873305.595	-773746.6236	-675291.1642	-835097.8267	-892440.4286	-894260.6686	-792253.4502	-720882.6417	-947334.3123	-1006077.408	-1007915.874	-899508.0027	-681403.8661	-904657.0521	-961158.1019	-965500.4995	-858896.8628	-657359.485	-868861.2937	-920496.2368	-923084.4165	-818486.0147	-778971.4768	-896052.7899	-936036.6383	-916877.3984	-795925.095	-783228.6701	-1004622.403	-1060168.512	-1059088.672
282	-574921.941	-796535.4478	-890255.954	-934075.2116	-779368.2051	-635693.7214	-895546.7782	-987955.733	-1034976.374	-976330.3308	-578692.265	-831131.4993	-923165.2877	-974157.1823	-923192.3908	-544946.8275	-776366.7261	-859258.4485	-902187.0226	-848887.7586	-682025.2535	-857475.277	-931928.4208	-961306.4022	-884763.0188	-700737.0287	-952698.8993	-1038791.526	-1078852.233	-1010968.403	-646045.2108	-890661.2	-976219.7926	-1020142.753	-959230.4958	-610710.4011	-835246.3984	-912221.3623	-948683.8319	-885432.8081	-789128.5661	-918415.1063	-973600.8397	-988537.5304	-990157.8325	-765780.2686	-1009850.958	-1089627.329	-1122728.092
283	-581326.7774	-767064.8446	-818132.8319	-850424.5166	-765522.0031	-686936.5131	-902188.443	-947235.1101	-939964.6671	-815760.0253	-657294.8787	-874717.5391	-915501.7564	-910318.4769	-787609.6107	-640921.0276	-853944.3157	-890669.3919	-887800.4822	-770005.3117	-681553.7263	-828826.9351	-864018.1701	-877007.6193	-772407.6533	-746300.9572	-958230.0131	-1001927.696	-993572.491	-866837.4877	-715834.0524	-929672.904	-969200.2403	-962961.8916	-837700.185	-695465.4061	-904929.9452	-940532.2889	-936565.267	-816103.6184	-781780.6789	-890589.0238	-909903.4468	-903590.6577	-779293.3073	-805665.3388	-1014271.521	-1056620.289	-1047180.307
284	-577541.7463	-808561.4303	-895330.2648	-924164.7036	-850628.6991	-654505.658	-918045.167	-1007690	-1042200.832	-963633.0585	-597552.034	-847793.3482	-937698.5568	-976258.6913	-901835.8856	-559516.3979	-781637.2967	-862159.8183	-892969.0939	-817156.8107	-685536.4827	-864295.5945	-930202.9041	-937262.8108	-848396.6455	-717230.9177	-972226.1129	-1055389.748	-1083604.634	-997145.9172	-663194.9114	-905159.4147	-988471.3009	-1020702.316	-937615.0014	-624437.8388	-839603.9455	-914295.4716	-939570.6371	-855000.6159	-793531.2216	-920029.7535	-965075.4759	-950360.8401	-846164.6022	-779956.1149	-1026407.007	-1103089.486	-1125008.446
285	-633215.3108	-819153.2326	-894943.2952	-905910.6057	-818355.3131	-840317.9329	-1052456.922	-1093973.937	-1089251.538	-968899.2413	-822923.6478	-1038054.925	-1076854.28	-1072973.565	-953241.2453	-777709.6825	-989016.5066	-1025546.155	-1022465.638	-906769.0915	-719005.8095	-868245.6641	-925908.4697	-918146.9264	-810390.1677	-881157.458	-1090184.254	-1130502.902	-1124608.389	-1001467.654	-862473.2809	-1074219.898	-1111840.81	-1106870.711	-984341.9877	-816018.8378	-1023946.178	-1059372.804	-1055202.667	-936636.0197	-804796.3124	-917338.0955	-956873.5901	-930383.1847	-802425.0224	-921996.9039	-1127911.523	-1167031.885	-1159965.241
286	-614439.1383	-800497.8918	-874876.0757	-886466.9723	-799559.0693	-788398.7382	-1000821.937	-1043325.448	-1037853.953	-917067.8753	-767187.5843	-982456.233	-1022114.37	-1017552.851	-897532.8378	-731732.7436	-943292.7767	-980660.6651	-976907.3141	-860839.3459	-704711.2249	-853917.0624	-910572.1133	-903419.3124	-796055.9427	-835398.8624	-1044716.381	-1085996.53	-1079362.659	-955791.2384	-813055.5993	-1024944.992	-1063401.496	-1057762.244	-934950.1502	-775478.0703	-983660.5621	-1019898.576	-1015071.724	-896139.4638	-794983.3148	-907336.2331	-946268.0951	-920371.5901	-792552.8162	-882398.9105	-1088610.763	-1128667.627	-1120871.364
287	-561919.1173	-776886.2358	-857003.0132	-880570.9232	-803203.4395	-622815.7084	-868331.3647	-942470.8074	-961385.9773	-866901.1094	-572886.5973	-810708.3806	-883789.5629	-905725.474	-814390.4296	-550829.7163	-769526.669	-835755.1202	-853043.7851	-762119.4074	-670422.5541	-838455.249	-899467.0959	-902332.2563	-807391.8496	-689359.8268	-928305.5225	-997824.2398	-1012312.604	-911785.5936	-641128.9339	-872451.1235	-940850.5851	-958372.0202	-860500.1202	-616484.3232	-829521.4999	-891575.4933	-904965.9723	-807421.3895	-778925.9925	-900024.2589	-941931.1128	-924093.517	-811580.2663	-755903.8827	-988279.6243	-1053177.666	-1063239.237
288	-588512.7842	-821845.4859	-924051.0858	-977759.1744	-799451.6291	-658747.7795	-934058.5387	-1041750.489	-1107397.282	-1070154.053	-595225.395	-859900.6441	-968225.9634	-1038770.387	-1011312.699	-548118.0129	-785818.7602	-882739.6696	-942242.2187	-910467.0004	-694846.8759	-879123.1501	-960967.91	-1001694.912	-934897.9782	-721029.9968	-986839.7001	-1086547.606	-1143281.501	-1094637.967	-660743.1088	-916101.0519	-1016220.478	-1077675.504	-1037870.974	-613484.3121	-843125.6409	-932567.0988	-983776.9071	-939671.1484	-801180.9677	-936400.8143	-997884.6914	-1025630.588	-1070344.327	-783312.1451	-1039620.799	-1131344.736	-1179165.72
289	-585031.5361	-823747.1296	-913705.0886	-945064.4028	-873365.2833	-669698.4311	-941878.9227	-1038957.34	-1080945.033	-1010008.221	-609377.1202	-865572.597	-963543.5683	-1010073.676	-943758.9239	-563680.9606	-787443.3652	-874818.7398	-912110.0571	-843542.8034	-692782.3916	-876683.9546	-944938.2435	-954009.1924	-868055.1356	-730592.8563	-993282.4911	-1082987.763	-1117783.408	-1038069.303	-673773.7666	-920840.4004	-1011301.591	-1050584.662	-974585.3629	-628250.9077	-844437.6644	-925187.8674	-956160.7809	-877811.0148	-800533.2501	-929620.7736	-976171.3299	-962953.9015	-862745	-791487.219	-1044686.009	-1127018.175	-1154621.796
290	-600820.857	-791437.3328	-774686.7026	-868521.0924	-782724.9331	-718206.3132	-941816.5812	-998348.006	-979596.7372	-847188.4453	-689978.7	-916843.8974	-971743.3415	-952470.7705	-820290.5229	-668548.7913	-891402.0711	-942280.8455	-925397.1323	-797780.4298	-699522.1779	-861607.0021	-913879.1032	-906683.9865	-790050.2012	-774348.2874	-993979.2246	-1048248.326	-1029324.807	-895032.4913	-745166.6991	-967710.8343	-1020311.256	-1001024.116	-867030.2431	-720028.1106	-938544.399	-987259.9968	-970306.9739	-840800.543	-798223.4938	-931776.6714	-1053071.436	-944846.8131	-797375.4743	-830490.1992	-1046141.805	-1098148.645	-1079052.867
291	-586751.5842	-795756.8727	-873034.1595	-899300.9947	-816677.9287	-695764.4798	-934524.4906	-1002640.98	-1012844.122	-916764.1067	-654677.0686	-888159.5564	-954527.9001	-967698.8143	-873986.3707	-622585.0779	-840196.9527	-900238.8333	-910171.2889	-817952.5157	-688110.367	-852276.2502	-911642.8755	-916048.9557	-815533.2802	-753667.5829	-986566.4268	-1050728.499	-1057284.176	-955773.3357	-713574.0215	-941189.7844	-1003563.774	-1013114.075	-913576.2427	-679647.4689	-892053.945	-948529.7139	-955263.0859	-857112.4619	-789469.1471	-908795.6277	-950251.5237	-932796.8647	-814388.6265	-811570.6234	-1038608.3	-1098816.027	-1101724.23
292	-587166.4775	-819338.2778	-920703.3458	-973431.8484	-797462.1685	-656464.0484	-930243.5702	-1036421.589	-1100223.279	-1060859.891	-593587.6259	-857050.7775	-963762.2605	-1032369.814	-1002583.516	-547803.8758	-784882.4433	-880413.6238	-938274.3577	-904366.9711	-693576.7682	-876978.7155	-958091.2631	-997694.0332	-929931.6176	-719019.7788	-983457.7181	-1081816.897	-1136899.148	-1086349.674	-659287.1375	-913580.9844	-1012258.017	-1071976.32	-1030080.861	-613209.5289	-842345.1244	-930551.6536	-980300.593	-934298.3076	-799987.0589	-934619.1531	-995479.1371	-1021956.156	-1062401.067	-781575.4403	-1036671.804	-1127212.217	-1173575.018
293	-677597.8951	-781262.639	-814627.9035	-802959.1568	-707938.185	-983348.8324	-1113503.578	-1086910.381	-1004111.431	-803948.739	-1019705.579	-1182187.879	-1147410.553	-1060608.499	-853853.3526	-991059.298	-1195272.046	-1171781.634	-1099439.173	-902403.4505	-737878.8358	-830039.9396	-856983.0836	-832389.5349	-704002.2281	-1006922.972	-1143280.834	-1124179.381	-1049120.651	-855037.8658	-1035316.804	-1202795.04	-1175748.692	-1096954.622	-897576.6115	-1001755.31	-1208602.128	-1191644.81	-1126019.451	-936412.4006	-798159.7809	-878817.2381	-899338.2013	-861819.8504	-700066.2724	-1030497.049	-1173057.992	-1161448.382	-1094129.88
294	-572991.2775	-799335.2632	-884166.525	-911466.9598	-836814.9443	-645275.1931	-903564.8187	-988693.3318	-1018661.55	-935457.5368	-590367.6285	-836991.4537	-921996.2574	-955714.1845	-876365.2798	-556986.1916	-778109.7833	-854468.8108	-881339.8813	-801125.8347	-681134.1851	-856768.9684	-921250.356	-927088.4413	-836453.0061	-709112.7878	-959433.1778	-1038622.4	-1062839.105	-972282.6567	-656767.6613	-895632.3332	-974600.6147	-1002547.108	-915153.4256	-622121.1849	-836667.1892	-907677.7279	-929491.1909	-841142.0145	-789277.0951	-914202.669	-958334.1199	-942709.8464	-836091.0772	-772950.3201	-1015301.484	-1088551.46	-1107016.669
295	-589986.1692	-800474.3283	-885113.0655	-817765.9647	-830168.4558	-683869.3538	-927595.9954	-1008438.764	-1034307.183	-928011.9827	-640958.8815	-881833.3389	-961553.4016	-991505.8215	-886758.8198	-610949.3809	-838328.6237	-911069.2573	-935795.1625	-834096.1766	-691944.4084	-860697.5801	-936986.8048	-942041.6834	-846379.2086	-743588.9835	-981165.5946	-1057147.611	-1078267.699	-967415.106	-701470.1096	-936079.2047	-1010809.549	-1035970.858	-926392.201	-669089.9176	-890707.9269	-958799.6401	-979158.7002	-872465.1161	-793902.6531	-920920.8372	-988860.4869	-1066317.34	-862589.9613	-803308.5453	-1034735.12	-1105856.458	-1122228.203
296	-599210.8283	-768878.2727	-826856.6897	-832096.4307	-744482.4357	-761413.5468	-947382.3394	-975908.0379	-947677.2509	-803893.3453	-749905.7126	-946844.2134	-970395.852	-942127.2969	-797331.4519	-731972.0683	-937742.9706	-962381.9294	-938943.5446	-799550.4673	-689342.7534	-827100.3916	-871401.6017	-860148.9728	-747919.0146	-811670.5169	-997222.9803	-1026806.961	-999871.7046	-855759.4273	-797410.5282	-993395.3442	-1018092.604	-991258.2136	-846484.243	-775188.3442	-979366.0992	-1004858.128	-982510.6144	-843101.5725	-779474.6832	-885322.508	-915946.4501	-888201.4512	-751355.5946	-861927.4245	-1047063.559	-1077705.885	-1052066.158
297	-589209.3671	-832217.766	-923954.6298	-956722.3284	-886047.8299	-678173.0133	-955173.4754	-1056398.371	-1102556.684	-1035876.449	-615973.1948	-875489.9245	-977960.0066	-1028935.794	-967143.7421	-566003.9683	-790682.0107	-881879.9308	-922786.9536	-858261.0029	-696824.185	-883594.2254	-953157.6676	-963350.3829	-879020.7105	-738046.1926	-1005027.813	-1098382.033	-1136848.449	-1060896.511	-679674.6892	-929587.3094	-1024036.406	-1067253.139	-995207.5606	-630377.8509	-847133.9298	-931263.6841	-965414.8215	-890534.7355	-804439.0062	-934970.6783	-982360.6363	-969978.3554	-871993.6041	-797919.3094	-1054882.101	-1140365.682	-1171140.227
298	-678658.5754	-781709.6827	-814816.008	-802955.4088	-707853.9361	-986432.0756	-1115968.952	-1088833.184	-1005485.582	-804749.1086	-1023335.489	-1185422.764	-1150067.389	-1062678.162	-855290.1565	-994431.2643	-1198581.633	-1174614.309	-1101785.461	-904162.2106	-738575.9499	-830315.9259	-857071.0042	-832329.1391	-703773.7999	-1009638.191	-1145446.875	-1125868.145	-1050326.345	-855735.2942	-1038523.15	-1205668.176	-1178110.625	-1098796.259	-898860.5176	-1004710.917	-1211539.787	-1194163.122	-1128108.526	-937989.9448	-798493.3288	-878922.167	-899325.9379	-861702.8068	-699693.6647	-1032844.245	-1174924.701	-1162903.105	-1095167.116
299	-614907.9273	-806380.1887	-771611.1471	-882295.1597	-796149.2584	-750270.6696	-975992.6753	-1034602.577	-1013716.664	-879239.6894	-724007.2714	-953203.6209	-1010553.882	-988781.9021	-854287.0198	-696726.2565	-921741.7735	-974723.5533	-955667.9038	-825941.7139	-711343.365	-876185.7749	-928440.721	-920686.446	-801734.2995	-802780.1032	-1024331.915	-1080482.107	-1059624.781	-923451.8185	-775457.8371	-1000128.834	-1054968.685	-1033396.706	-897291.4574	-744929.7108	-965403.3386	-1016027.432	-997100.5187	-865685.6935	-807778.7966	-945991.3611	-1085270.226	-959077.6638	-807319.3466	-855289.4742	-1072671.091	-1126361.636	-1105532.887
300	-605837.6263	-823002.9677	-903527.4945	-934164.877	-852095.2239	-742693.1028	-990592.7948	-1066495.026	-1083563.738	-997145.1586	-700302.3358	-940197.4883	-1014949.067	-1035628.101	-951932.8375	-654278.2732	-873698.5207	-940687.2056	-956643.2871	-873677.3894	-704269.9425	-873930.9536	-935849.0136	-943514.7412	-844879.2684	-794995.4833	-1036021.477	-1107014.579	-1119516.658	-1026700.048	-754126.9379	-987242.0594	-1057019.335	-1073134.591	-982503.7408	-707743.1599	-921290.0379	-983868.0342	-995826.7347	-905804.0229	-802702.2552	-924858.9395	-968170.463	-952864.5571	-837663.3058	-847297.8013	-1081450.097	-1147534.146	-1155469.578
301	-585499.2379	-771163.1073	-820698.0684	-854589.808	-769620.0415	-697595.814	-912991.0392	-957889.7517	-950743.3839	-826399.7632	-668651.6378	-886213.3452	-926772.2709	-921791.6256	-798953.1906	-650275.0161	-863332.219	-899682.8797	-897147.1876	-779339.4509	-684912.2481	-832026.9119	-865695.8755	-880241.4572	-775737.6514	-755724.2867	-967774.9064	-1011322.956	-1003095.024	-876242.4866	-725922.3129	-939880.0213	-979185.9462	-973147.8306	-847776.1389	-703718.8856	-913200.5307	-948439.2597	-944797.1688	-824338.301	-784325.2623	-892890.7144	-910693.621	-905893.042	-781855.2653	-813852.6969	-1022558.711	-1064756.168	-1055446.656
302	-619505.0258	-754024.7122	-839395.5615	-841934.0275	-751816.3777	-808284.9569	-987766.0825	-1010582.684	-973159.346	-822116.7234	-799995.7136	-988792.4285	-1008045.333	-971173.2375	-818707.7169	-775329.4138	-971823.0594	-995419.0784	-966274.5536	-820140.8606	-707188.8905	-811114.556	-881696.9459	-870024.145	-754399.5154	-853780.4868	-1033401.807	-1057908.353	-1022691.71	-872023.9366	-842379.3319	-1030877.955	-1051838.174	-1017294.295	-865591.7268	-813569.1804	-1009174.055	-1034065.44	-1006792.314	-861360.9071	-794872.7524	-868204.4004	-923998.2721	-898114.2015	-756982.6532	-899275.9425	-1079037.469	-1105234.022	-1072224.063
303	-604151.346	-818532.0771	-899174.7136	-894497.2764	-849072.6394	-725574.64	-974436.0783	-1053682.517	-1071816.025	-984716.7376	-682059.85	-924936.9109	-1002146.196	-1021372.828	-939157.0581	-640092.2023	-864676.4012	-932599.377	-944083.7898	-864863.5975	-703887.1205	-873266.4219	-933458.4717	-908110.5415	-844977.1087	-780207.1084	-1022225.083	-1096369.179	-1109972.545	-1016654.294	-737975.0654	-974024.3211	-1046088.616	-1060911.853	-971910.9899	-694992.8371	-913517.7845	-976837.0719	-984532.8263	-898339.6963	-803622.8949	-928000.7667	-967742.1672	-921723.7374	-840881.578	-834839.5143	-1070014.013	-1139055.854	-1148129.039
304	-635006.5368	-763311.7087	-807074.6148	-803109.6583	-711321.1811	-859541.9584	-1014507.09	-1009700.669	-948932.7354	-771810.0913	-873947.4162	-1052291.863	-1040725.94	-977501.6866	-796158.8455	-855658.8178	-1062376.386	-1058036.244	-1005224.552	-831780.8714	-709886.39	-818957.7775	-853452.6544	-834814.7144	-713174.7105	-897893.9929	-1056303.972	-1056367.494	-1000706.32	-827032.7988	-906566.7967	-1087424.966	-1080905.868	-1023004.145	-846021.6786	-883073.6728	-1090641.151	-1090522.637	-1042133.165	-873066.5018	-784766.2463	-874603.8448	-899830.6316	-866519.7079	-715028.2406	-936245.9649	-1098100.767	-1103034.319	-1052479.912
305	-644893.9911	-829501.6602	-857214.0754	-913882.5097	-827955.401	-849330.3984	-1066765.424	-1109558.012	-1104177.847	-977855.8699	-830314.5025	-1049855.537	-1087207.449	-1085111.289	-960428.4503	-783428.5472	-996968.5248	-1027989.401	-1030197.045	-912210.4284	-732720.6279	-877578.4115	-889577.9226	-926274.9691	-823139.9972	-889864.884	-1103645.957	-1145063.989	-1138647.78	-1010122.149	-869528.1671	-1085177.796	-1121331.941	-1118144.132	-991206.81	-821206.7283	-1030931.877	-1060994.572	-1061977.854	-941558.5722	-820547.2733	-925655.1584	-921941.7095	-938667.3617	-818324.602	-930399.3072	-1140526.426	-1180569.984	-1173117.695
306	-573933.0656	-801244.7575	-886477.0292	-914094.9492	-839673.9089	-647185.5769	-906561.7449	-992624.9786	-1023533.359	-941288.8856	-591854.5495	-839227.0685	-925246.0848	-959966.1797	-881636.8054	-557509.8559	-778839.8553	-856060.5807	-883746.722	-804443.6867	-682045.3069	-858326.7171	-923103.2207	-929194.1803	-838924.9223	-710792.9571	-962080.8685	-1042092.656	-1067136.844	-977428.4831	-658097.8775	-897604.1063	-977471.3622	-1006304.602	-919802.1872	-622600.6513	-837274.9952	-909047.3697	-931577.2841	-844010.2609	-790157.5507	-915408.6719	-959729.3451	-944293.3349	-838175.945	-774400.2749	-1017599.939	-1091560.323	-1110740.338
307	-644491.8538	-767309.4742	-808756.7715	-803076.1409	-710567.7703	-887114.3931	-1036554.123	-1026895.673	-961221.318	-778967.5352	-906408.5171	-1081220.381	-1064485.158	-996010.0058	-809007.7123	-885813.2089	-1091972.941	-1083367.934	-1026206.638	-847508.887	-716120.4533	-821425.8326	-854238.8994	-834274.6143	-711131.951	-922175.3135	-1075674.171	-1071469.554	-1011488.444	-833269.6729	-935240.093	-1113118.481	-1102027.858	-1039473.301	-857503.2303	-909504.6908	-1116911.674	-1113043.071	-1060815.077	-887173.9629	-787749.0561	-875542.1894	-899720.9648	-865473.0252	-711696.1325	-957236.1714	-1114794.131	-1116043.434	-1061755.576
308	-634179.9015	-759735.5357	-848037.2477	-848558.4468	-757412.1651	-849875.6443	-1023475.092	-1042176.351	-999801.4463	-843867.405	-846617.4141	-1030754.576	-1045862.322	-1003926.685	-846085.4071	-816634.9348	-1010347.954	-1030956.206	-997933.8286	-846895.7356	-718123.6143	-814276.8641	-887998.4044	-875099.7505	-757763.3166	-890583.3729	-1064877.18	-1085788.439	-1046193.24	-891175.969	-883756.3141	-1068122	-1085455.041	-1046425.573	-889956.2595	-849930.4507	-1043181.847	-1065522.84	-1034867.134	-885141.2369	-802067.3238	-868818.1933	-927959.5035	-901640.9934	-758114.4681	-931291.0255	-1106279.205	-1129400.528	-1092585.02
309	-585810.3011	-740912.1907	-819553.5374	-826723.8143	-738967.9883	-712789.3094	-905775.2518	-938041.0213	-911986.8866	-772175.3651	-692948.4449	-892443.8771	-921214.4057	-895968.622	-755846.2828	-680488.5316	-883366.7249	-913822.9023	-893582.2476	-758709.4616	-682081.8631	-803853.6358	-867228.2777	-858370.1362	-746675.9505	-769278.0255	-961131.7561	-993893.3763	-968730.2593	-828049.291	-747374.3687	-945362.5554	-974651.0766	-950406.4802	-809648.7506	-730080.7055	-931089.3604	-961836.6549	-942330.2109	-806759.309	-778353.4233	-866795.0814	-914902.958	-890016.3964	-754383.9128	-825766.6722	-1016488.198	-1049745.731	-1025473.625
310	-591046.6601	-742949.9539	-822637.105	-829087.5712	-740964.7038	-727629.8963	-918517.1105	-949314.4236	-921493.4476	-779936.5467	-709584.2219	-907417.0103	-934708.4439	-907655.8629	-765615.3205	-695227.3641	-897113.361	-926503.4294	-904879.0607	-768256.2634	-685983.6432	-804982.0257	-869476.7941	-860181.2379	-747876.2381	-782410.2064	-972362.9483	-1003841.681	-977116.187	-834883.2103	-762138.7003	-958652.1529	-986646.4069	-960801.2412	-818342.6191	-743055.307	-943224.1826	-973061.4341	-952348.0019	-815244.7195	-780920.6245	-867014.0979	-916316.4235	-891274.8431	-754787.7724	-837190.4464	-1026208.724	-1058368.939	-1032738.919
311	-608945.4669	-776077.8684	-832501.008	-836389.3254	-748255.0882	-790599.0384	-972419.3615	-998217.8143	-967053.9826	-820099.4449	-782989.1562	-977091.3196	-997678.2838	-966290.869	-817964.2935	-761436.1599	-966176.9734	-988370.8364	-962411.5475	-819758.8514	-696187.8708	-832250.7461	-875344.6572	-863087.6681	-749876.2224	-837401.1571	-1019204.221	-1046419.064	-1016913.067	-869996.5727	-826695.2206	-1020203.929	-1042303.303	-1012719.228	-864833.6826	-801093.6097	-1004507.584	-1027869.025	-1003314.814	-861069.5126	-783430.2802	-888423.6211	-918188.2425	-889785.9471	-751497.3577	-884203.2132	-1065989.019	-1094620.313	-1066772.152
312	-538693.3285	-753147.5589	-805991.153	-806693.9377	-717438.499	-729920.3754	-900844.3606	-912863.7368	-875356.8041	-726331.1961	-717908.2155	-896024.2769	-902510.8403	-864990.0547	-714547.4039	-712754.4944	-900571.9575	-909712.8748	-877976.0305	-732905.6108	-703267.4679	-826875.7178	-859240.7203	-841828.0001	-726448.2829	-785465.8969	-957530.8664	-971865.7635	-936375.1589	-787427.6569	-770539.2392	-949385.1097	-958368.6447	-923030.9789	-773018.818	-759541.9699	-947433.4174	-958802.5202	-928914.0429	-784229.6599	-867841.6073	-900603.8767	-912490.2243	-876961.9999	-735458.0663	-841011.3683	-1014217.31	-1030867.796	-997393.5136
313	-614886.3373	-836065.0074	-927985.0791	-824158.9221	-879722.4097	-736220.5773	-993398.9662	-1089498.604	-1130806.999	-1031817.72	-690893.463	-942952.7756	-1038943.547	-1085624.556	-988254.3388	-644694.3086	-878662.2724	-965616.53	-1004358.027	-909791.465	-713516.3319	-891073.0051	-978062.8007	-987413.3872	-896231.037	-789869.7526	-1039524.712	-1129185.212	-1164123.602	-1059778.832	-745893.1179	-990386.5291	-1079738.383	-1119945.993	-1016824.082	-698895.9831	-926033.3833	-1006816.783	-1039688.391	-939163.8001	-812146.3343	-946081.0106	-1028140.467	-1150667.79	-912739.6642	-843518.8576	-1085650.379	-1168871.82	-1197440.189
314	-586482.2212	-772720.8879	-844996.8448	-857516.2346	-771572.2668	-711093.2797	-923939.6537	-967912.0153	-961325.1498	-839893.1901	-684198.9715	-899672.1603	-940608.9868	-935033.7802	-814585.4038	-663275.0495	-875212.1001	-913828.0926	-909072.9196	-792451.9208	-683427.2002	-832582.3879	-887736.935	-881490.5257	-774712.8952	-767266.2722	-977016.6646	-1019728.447	-1011993.702	-887781.0106	-739474.7866	-951576.7653	-991277.4314	-984641.8378	-861407.8184	-715114.6028	-923677.0041	-961123.1411	-955318.4691	-835841.8256	-780372.1815	-892443.888	-930476.9671	-905464.7544	-777853.5237	-823439.1933	-1030093.613	-1071544.888	-1062662.255
315	-541211.8964	-771601.579	-815581.3832	-808539.2115	-716362.3568	-823176.7117	-969687.1262	-961875.3668	-907885.4001	-743777.0638	-825735.5631	-982280.7775	-967711.7385	-913013.2478	-745883.5986	-814089.3562	-987718.2252	-978679.8957	-932589.9524	-771848.578	-737320.6319	-846380.8209	-867321.0183	-842558.6219	-721637.0652	-868574.9197	-1018637.733	-1015225.236	-965044.7229	-802643.6269	-866815.5104	-1026426.007	-1016524.568	-965844.6084	-800976.8562	-849351.5559	-1025022.492	-1020197.265	-977586.4366	-819074.7502	-933429.3674	-921160.0629	-919060.5897	-876577.9698	-726911.7731	-913973.0845	-1067588.277	-1068575.114	-1022204.046
316	-594421.2253	-832848.6937	-938743.0771	-996750.2055	-808182.6348	-668770.2295	-950801.0225	-1065137.055	-1138881.324	-1110942.688	-602412.9568	-872407.6533	-987815.5024	-1066860.132	-1049621.849	-549496.6443	-789927.9083	-892947.8231	-959655.691	-937237.7698	-700420.9085	-888534.2796	-973592.4479	-1019253.288	-956693.4956	-729852.0991	-1001681.966	-1107308.937	-1171291.282	-1131012.214	-667132.8276	-927160.6945	-1033610.253	-1102687.115	-1072058.892	-614690.2336	-846551.0384	-941412.1415	-999033.1622	-963250.557	-806420.5916	-944219.8655	-1008441.778	-1041756.309	-1105204.356	-790933.8989	-1052562.848	-1149480.833	-1203701.24
317	-639577.9776	-761836.2322	-851216.0467	-850995.2048	-759470.5462	-865174.5607	-1036610.464	-1053797.915	-1009601.603	-851868.2793	-863766.9624	-1046190.132	-1059773.104	-1015974.869	-856156.147	-831828.9544	-1024519.135	-1044028.353	-1009579.527	-856737.3762	-722145.8952	-815440.1025	-890316.3629	-876966.7854	-759000.6733	-904121.1218	-1076455.231	-1096043.983	-1054838.155	-898220.9437	-898976.6203	-1081822.027	-1097820.829	-1057141.36	-898918.6252	-863305.7535	-1055691.435	-1077094.28	-1045194.31	-893888.7066	-804713.8092	-869043.9738	-929416.6218	-902938.3053	-758530.8003	-943067.606	-1116299.934	-1138290.05	-1100074.692
318	-637694.3392	-822430.0376	-852787.7157	-906695.2281	-820884.1655	-830937.5919	-1048125.359	-1091173.245	-1085578.986	-959496.8197	-810718.22	-1030019.326	-1067759.983	-1065314.175	-940854.9087	-767288.0798	-980769.5369	-1012436.474	-1014069.145	-896104.2112	-726925.441	-872056.7967	-886683.0132	-920694.9263	-817394.0285	-873604.7674	-1087176.08	-1128852.306	-1122216.486	-993893.6617	-852120.7007	-1067565.24	-1104101.435	-1100568.12	-973820.5788	-806965.2081	-1016660.84	-1047350.958	-1047773.567	-927349.4862	-816156.5509	-921683.5518	-920578.2503	-934694.558	-813903.8995	-916271.8803	-1126226.738	-1166531.384	-1158853.969
319	-546440.8781	-809915.3102	-835492.3566	-812370.3183	-714128.0998	-1016792.963	-1112616.591	-1063631.97	-975420.38	-779997.6965	-1049603.749	-1161364.162	-1103080.057	-1012717.686	-810942.948	-1024478.021	-1168648.919	-1121867.335	-1045977.881	-852700.8999	-808020.8784	-886876.7819	-884097.1118	-844075.5189	-711648.147	-1041123.596	-1145506.135	-1105246.984	-1024567.687	-834234.6071	-1066701.668	-1186376.207	-1137266.304	-1054733.093	-859022.5695	-1035811.759	-1186110.805	-1147663.352	-1078638.727	-891419.1723	-1069600.879	-963838.2535	-932701.8025	-875780.6569	-709168.1931	-1065454.201	-1178395.617	-1146862.015	-1073714.993
320	-586058.682	-741008.8497	-819699.803	-826835.9365	-739062.7003	-713493.2562	-906379.6477	-938575.7627	-912437.8198	-772543.5081	-693737.5445	-893154.1111	-921854.4804	-896522.9933	-756309.6663	-681187.6518	-884018.7814	-914424.389	-894118.0994	-759162.3036	-682266.9397	-803907.1598	-867334.9335	-858456.0438	-746732.8848	-769900.936	-961664.4953	-994365.2631	-969128.0364	-828373.4504	-748074.6984	-945992.9327	-975220.0619	-950899.5442	-810061.1346	-730696.1413	-931664.9623	-962369.0899	-942805.3938	-807161.8051	-778475.1956	-866805.4702	-914970.0042	-890076.0894	-754403.0694	-826308.5463	-1016949.28	-1050154.764	-1025818.246
321	-578513.4817	-803223.9241	-899186.7165	-945619.2144	-784675.487	-641786.0284	-905723.9655	-1002171.632	-1054114.454	-1001124.357	-583061.3397	-838734.0854	-935073.1032	-991231.9843	-946479.2223	-545784.8507	-778864.5376	-865463.6383	-912772.081	-865160.8001	-685413.5186	-863195.983	-939602.4486	-971979.5427	-898011.7736	-706099.685	-961721.0089	-1051411.634	-1095878.428	-1033079.073	-649929.3038	-897383.9811	-986790.4459	-1035346.462	-980012.1704	-611443.4398	-837328.5812	-917597.9633	-957957.5912	-899765.9297	-792313.5555	-923168.0419	-980018.1342	-998339.8086	-1011348.06	-770413.2739	-1017717.99	-1100651.646	-1137642.401
322	-633961.9212	-794579.6707	-847005.9977	-847421.3736	-757950.1981	-865601.0548	-1036760.479	-1055550.349	-1016849.065	-861746.5128	-868008.2821	-1054821.515	-1067789.743	-1028387.36	-870987.3755	-837154.1334	-1039247.784	-1055158.145	-1022720.538	-871691.1464	-713778.7208	-845486.3284	-885477.6751	-870639.6421	-754905.9314	-903524.7613	-1075692.474	-1096819.011	-1060706.627	-906583.7453	-901952.1673	-1089097.677	-1104520.903	-1067870.582	-911988.7893	-867665.9731	-1069117.153	-1087003.327	-1056778.259	-907244.2271	-793595.5278	-896392.9825	-923949.2882	-893857.8463	-751861.6661	-941448.4054	-1114624.406	-1138087.673	-1104564.189
323	-655007.8424	-810144.9251	-859208.8009	-856702.4498	-766106.5306	-928698.9866	-1090889.576	-1103783.244	-1058740.828	-896783.4888	-939533.4392	-1120214.617	-1126773.331	-1080628.091	-915594.8005	-900854.3878	-1100721.026	-1111345.181	-1073457.475	-915380.9106	-728577.6064	-856621.2007	-894002.4122	-876992.9905	-759137.3407	-959153.4347	-1123215.088	-1139219.637	-1097549.41	-937363.9167	-965264.5676	-1147056.826	-1156863.521	-1114268.486	-951659.5854	-923672.1799	-1123472.094	-1136752.019	-1101756.154	-946090.2358	-802147.3793	-903097.4719	-928795.9588	-897283.4665	-752168.1526	-989607.8203	-1155540.537	-1174656.029	-1136357.993
324	-609523.3169	-794759.9728	-835468.1178	-878572.609	-793215.6153	-758969.6466	-975189.9334	-1019236.757	-1012804.786	-887660.9568	-734041.2761	-952403.5846	-991665.3328	-987851.4085	-864266.9462	-704133.1564	-917385.6327	-951580.4942	-950963.3938	-833083.3034	-704249.8534	-850451.6508	-875355.7218	-898861.1613	-794911.0234	-809981.677	-1022732.233	-1065418.73	-1057923.606	-930394.3333	-784008.2245	-998650.2835	-1036681.372	-1031796.153	-905791.1922	-751240.5446	-960820.6826	-993965.8014	-992194.5884	-871751.7324	-798976.3957	-906143.3259	-915243.2647	-919149.6481	-796606.4374	-860993.6449	-1070274.47	-1111600.714	-1103042.415
325	-616948.7476	-781996.9774	-837141.4539	-839918.7056	-751356.7543	-814593.7334	-993003.4147	-1016559.677	-982984.4584	-833423.2026	-810188.5316	-1001958.815	-1020108.388	-986156.8198	-834927.4732	-785659.9044	-989553.836	-1009737.477	-981705.64	-836373.0658	-701815.5473	-836485.0824	-878586.419	-865503.7007	-751485.3303	-858555.4646	-1037275.981	-1062543.048	-1030923.532	-881701.5654	-850771.4731	-1042244.463	-1062207.999	-1030363.286	-879919.5757	-822391.4846	-1025177.52	-1046787.311	-1020418.875	-875841.758	-786682.353	-890973.1845	-920031.3201	-891088.6318	-751613.9075	-902517.1332	-1081548.484	-1108526.42	-1078862.606
326	-614841.6895	-800897.8524	-875306.3062	-886883.8335	-799962.0507	-789511.8582	-1001928.963	-1044411.324	-1038955.89	-918179.1123	-768382.5359	-983648.2395	-1023287.964	-1018741.042	-898727.1965	-732718.4647	-944273.0692	-981622.9861	-977884.0604	-861824.0552	-705017.6932	-854224.26	-910900.9166	-903735.0647	-796363.2609	-836379.9024	-1045691.188	-1086950.723	-1080332.703	-956770.5165	-814115.0881	-1026001.419	-1064440.009	-1058815.103	-936009.085	-776347.2428	-984524.2643	-1020744.883	-1015932.11	-897007.6885	-795193.7003	-907550.6677	-946495.4713	-920586.2334	-792764.471	-883247.8704	-1089453.35	-1129490.136	-1121709.516
327	-544491.1737	-795629.46	-828068.2511	-810941.8325	-714961.1761	-944600.2351	-1059323.193	-1025690.492	-950238.9482	-766492.2895	-966131.1328	-1094590.232	-1052605.946	-975541.3885	-786684.5923	-946031.4466	-1101186.192	-1068477.748	-1003699.489	-822553.8971	-781659.2294	-871777.2545	-877841.8934	-843509.9211	-715372.6652	-976786.2302	-1098201.345	-1071681.023	-1002373.655	-822455.4356	-992171.1113	-1126736.372	-1092245.934	-1021589.686	-837379.3533	-966287.2711	-1126046.607	-1100135.707	-1040959.863	-864444.4677	-1018827.285	-947925.049	-927615.4714	-876077.947	-715784.1535	-1008972.191	-1137079.436	-1117671.568	-1054508.363
328	-579071.5916	-765357.9484	-837076.6614	-849842.1698	-764153.7154	-690601.6742	-903560.2207	-947921.9351	-941039.4146	-819436.2491	-662200.914	-877728.3209	-919004.0939	-913160.1857	-792598.2617	-645128.7493	-857165.737	-896112.5685	-891091.8393	-774324.2469	-677785.3756	-826927.1374	-881683.9412	-875677.7919	-769055.4252	-749206.1482	-959071.2839	-1002162.554	-994135.9972	-869753.3216	-719970.4849	-932128.8145	-972159.2744	-965259.5776	-841913.7169	-699113.8651	-907776.9702	-945543.3482	-939479.4824	-819858.5374	-776499.1616	-888496.3264	-926291.1623	-901513.3517	-773957.1351	-807810.5522	-1014582.285	-1056403.181	-1047232.58
329	-672338.0314	-685093.5513	-866775.3148	-860823.0918	-764060.9163	-899641.0256	-1085036.216	-1079611.77	-1019652.025	-855068.676	-901381.071	-1100697.537	-1087085.318	-1025453.771	-858269.8927	-870508.2654	-1079736.436	-1071901.262	-1019034.821	-858749.0101	-772688.6848	-894217.8223	-927189.0023	-890164.1889	-764911.993	-936107.0362	-1121342.696	-1120053.652	-1064278.646	-901329.2857	-933809.0755	-1132327.303	-1123114.978	-1065964.931	-900918.9704	-898861.8423	-1106611.288	-1102687.903	-1053831.431	-895639.8108	-873039.3301	-1103342.093	-987602.6355	-919505.2235	-765763.0708	-972572.968	-1157649.131	-1160495.534	-1108905.268
330	-622461.9501	-844130.3433	-927994.437	-918355.5929	-883078.9167	-767196.7513	-1025290.238	-1113062.858	-1138221.046	-1060435.978	-722106.7858	-972065.9873	-1058156.165	-1084379.074	-1012393.214	-667513.6343	-895228.0183	-970221.2856	-986452.1049	-917304.8199	-719664.012	-894368.594	-956615.1315	-925817.4116	-873835.9867	-816937.0449	-1067200.153	-1148881.76	-1168616.262	-1083708.856	-773586.2026	-1015807.73	-1095745.355	-1116680.217	-1036857.908	-719255.9151	-940206.0306	-1009715.207	-1021427.722	-944224.1753	-816866.0738	-944606.8446	-985235.7635	-933279.1596	-864593.0568	-866677.2758	-1109109.989	-1184700.679	-1199011.445
331	-599329.8653	-789855.7638	-775012.2229	-867063.2293	-781304.0871	-714812.5849	-938199.3442	-994510.7806	-975985.445	-843796.1049	-686377.077	-912995.5425	-967635.5893	-948627.5587	-816692.2947	-665566.456	-888190.8821	-938847.0721	-922193.2391	-794799.8071	-698271.0098	-860063.9681	-912337.8849	-905201.9501	-788813.5428	-771339.0314	-990766.661	-1044836.665	-1026117.823	-892024.5571	-741960.6503	-964279.676	-1016643.074	-997597.7634	-863827.3614	-717392.4967	-935701.618	-984215.2184	-967471.1144	-838166.6701	-797212.1495	-930272.1724	-1049663.48	-943340.6035	-796323.0034	-827865.4155	-1043333.915	-1095162.55	-1076250.191
332	-578444.6264	-805858.9297	-895572.3111	-928312.7951	-828264.1587	-648368.8832	-911962.4318	-1004881.673	-1045387.079	-970710.2439	-590261.1172	-843343.6783	-936103.0053	-979590.3506	-908082.1438	-552449.9726	-780335.3543	-863200.8115	-897013.4058	-821048.6991	-685902.5076	-863865.2105	-933684.468	-942876.9836	-826786.2394	-711884.8335	-967058.785	-1053367.248	-1087148.002	-1004219.838	-656508.5598	-901349.13	-987367.0112	-1024124.418	-943784.5559	-617729.3323	-838538.2856	-915352.8715	-943219.4948	-858477.4723	-793360.3838	-921871.4913	-971796.5675	-957441.1196	-825308.3251	-775400.7214	-1022155.076	-1101852.823	-1128908.905
333	-638891.3807	-797598.014	-827500.4425	-808538.0705	-710815.1861	-1013985.618	-1134415.265	-1094238.679	-1003011.703	-799476.7599	-1046390.886	-1197265.992	-1149946.936	-1055788.935	-845077.6833	-1008961.609	-1203983.421	-1171897.096	-1094086.321	-892826.9994	-703020.0801	-846814.2115	-871522.3423	-838741.6744	-706702.1294	-1035456.479	-1163054.663	-1131471.741	-1048534.087	-851210.6013	-1060216.918	-1216981.219	-1178496.44	-1092900.704	-889603.7188	-1017822.263	-1216333.553	-1191860.267	-1121372.337	-927553.6849	-767148.7762	-896030.4135	-915544.1808	-868945.2158	-702589.0743	-1056927.277	-1191694.017	-1168704.786	-1094056.489
334	-614281.0736	-805715.2538	-771748.0047	-881682.2342	-795551.8959	-748843.8534	-974471.89	-1032989.302	-1012198.378	-877813.4567	-722493.0506	-951585.6673	-1008826.871	-987166.1108	-852774.2262	-695472.4012	-920391.7019	-973279.901	-954320.8995	-824688.5786	-710817.3397	-875537.0412	-927792.7507	-920063.3574	-801214.3745	-801514.9297	-1022981.265	-1079047.751	-1058276.477	-922187.2007	-774109.9265	-998686.2809	-1053426.481	-1031956.174	-895944.8784	-743821.6266	-964208.1557	-1014747.324	-995908.2458	-864578.3413	-807353.5999	-945358.8286	-1083837.428	-958444.4121	-806876.8591	-854185.9434	-1071490.578	-1125106.2	-1104354.565
335	-571355.313	-773844.5955	-853035.2773	-812982.6126	-793091.0921	-644699.0112	-878360.7582	-947787.9996	-962103.8887	-850342.2357	-603596.7238	-836102.4254	-903648.384	-921084.1037	-810817.6291	-585700.6801	-808150.0963	-870255.7821	-884494.9117	-777459.2887	-675803.8185	-837970.0156	-906252.8367	-908093.5717	-809078.9686	-708960.689	-937500.0131	-1003247.485	-1014028.414	-898306.5246	-668231.8328	-895445.2641	-959235.4722	-973138.8066	-858729.0686	-646788.3606	-864276.6396	-922872.1521	-933869.0473	-822559.6863	-780252.3275	-902095.4394	-959470.3372	-1003204.468	-825066.8451	-773222.3008	-996639.1983	-1058706.971	-1065952.933
336	-623631.4226	-697713.0769	-839409.9811	-840586.4394	-748276.0475	-782197.0251	-977556.1784	-990527.2514	-948663.6122	-798879.3187	-770090.902	-975242.4492	-981718.2814	-939196.5872	-788219.5763	-752299.7825	-962732.032	-972107.7009	-935555.7806	-790311.33	-727175.9546	-858418.6406	-898228.0804	-872659.4224	-754311.1765	-831658.1704	-1025828.155	-1041006.327	-1001455.543	-851750.6907	-816776.926	-1020227.749	-1029092.242	-989108.2074	-838536.2438	-794271.279	-1002557.796	-1014026.034	-979714.8307	-834823.886	-830720.4814	-1019124.204	-957046.1225	-904732.343	-760346.3063	-881119.2425	-1074100.08	-1091485.402	-1054247.474
337	-583266.6284	-812075.643	-911005.9404	-960896.8745	-791699.294	-649848.7599	-919192.7432	-1020985.356	-1079442.33	-1033937.473	-588843.4969	-848795.563	-950832.2432	-1013829.261	-977297.6744	-546893.9143	-782170.2122	-873675.7622	-926780.6469	-886697.0039	-689897.6445	-870766.9273	-949758.4742	-986104.679	-915545.5508	-713196.7763	-973661.1241	-1068113.442	-1118411.375	-1062340.959	-655069.6225	-906281.1	-1000779.948	-1055467.48	-1007515.227	-612413.564	-840084.2009	-924713.5093	-970230.7469	-918734.7887	-796528.6606	-929458.2115	-988510.9633	-1011312.421	-1039391.807	-776544.7243	-1028129.442	-1115241.539	-1157380.421
338	-598713.6211	-812948.7798	-900139.6081	-820006.6816	-847537.0031	-702218.3377	-950659.7859	-1036850.052	-1068130.148	-964395.6558	-658460.8379	-903255.5615	-988678.4704	-1024494.222	-922332.7667	-622776.9008	-852465.4752	-930187.9514	-959826.2895	-860627.2018	-699505.3182	-871344.097	-951383.8472	-957944.3616	-863852.1602	-759810.2871	-1001620.331	-1082396.625	-1108359.996	-999788.3804	-717040.2722	-955113.7975	-1034968.948	-1065403.95	-958088.3683	-679536.8753	-903089.4185	-975629.5388	-1000374.218	-895842.852	-800297.0215	-929739.4204	-1002628.03	-1095881.979	-880167.3173	-817402.1677	-1052580.802	-1127943.198	-1148589.832
339	-575089.4697	-796847.4341	-890672.5326	-934613.6857	-779615.7652	-635977.8992	-896021.4967	-988618.8386	-1035869.077	-977486.857	-578896.062	-831486.1246	-923720.732	-974953.6425	-924278.6133	-544985.9174	-776483.2374	-859547.8918	-902680.7664	-849646.8203	-682183.3004	-857742.1214	-932286.3785	-961804.2547	-885381.0117	-700987.1717	-953119.7388	-1039380.195	-1079646.426	-1011999.763	-646226.3857	-890974.7865	-976712.8645	-1020851.935	-960199.8644	-610744.5939	-835343.5226	-912472.1557	-949116.4097	-886101.3816	-789277.131	-918636.8086	-973900.1767	-988994.7612	-991146.2582	-765996.3768	-1010217.918	-1090141.562	-1123423.775
340	-609371.5373	-865388.9865	-970063.9647	-1015752.713	-904565.0813	-705522.2713	-1004104.547	-1129384.315	-1204330.438	-1163244.286	-632984.6181	-912140.3997	-1039522.921	-1118697.957	-1082026.36	-564345.5653	-802907.7792	-915132.4577	-977266.9381	-930500.0326	-715466.9741	-913671.9785	-995724.0839	-1014544.451	-891165.1237	-762186.6779	-1048608.146	-1163578.654	-1227875.333	-1174700.352	-694614.7525	-962106.6472	-1078937.107	-1147388.707	-1097642.56	-628453.8868	-857343.2561	-960150.7995	-1012878.556	-953175.6352	-821562.4023	-961954.9705	-1021384.149	-1013336.143	-877765.1747	-818851.022	-1093111.683	-1197772.992	-1251420.194
341	-578141.0234	-764433.3688	-836082.1075	-848878.5215	-763222.1524	-688028.5006	-901001.1329	-945411.7392	-938492.0926	-816867.4284	-659438.5722	-874972.7873	-916291.1225	-910413.4729	-789837.2906	-642850.0806	-854899.6177	-893887.9933	-888833.9176	-772047.9172	-677076.92	-826216.9958	-880923.8541	-874947.8749	-768345.005	-746938.3009	-956817.8451	-999956.7687	-991893.568	-867489.5472	-717521.2891	-929686.6949	-969758.5677	-962825.7069	-839465.802	-697104.6192	-905780.3699	-943586.9612	-937490.5478	-817851.4827	-776012.8185	-888000.6228	-925765.542	-901017.1658	-773467.8575	-805848.0312	-1012634.495	-1054501.806	-1045295.043
342	-649133.3577	-833665.6392	-859820.446	-918114.5922	-832119.1521	-860160.623	-1077741.242	-1120383.502	-1115129.402	-988666.2179	-841853.3692	-1061535.68	-1098658.688	-1096768.412	-971953.9264	-792932.5285	-1006506.965	-1037147.422	-1039693.627	-921694.2421	-736133.0042	-880829.7004	-891282.5302	-929560.6622	-826523.3923	-899439.3183	-1113343.904	-1154609.904	-1148323.008	-1019677.958	-879778.1946	-1095548.586	-1131477.77	-1128493.405	-1001444.334	-829592.5537	-1039335.083	-1069028.332	-1070341.756	-949925.2994	-823132.6596	-927993.757	-922744.5543	-941006.6652	-820927.6415	-938717.951	-1148946.503	-1188836.323	-1181516.597
343	-637011.579	-829826.6311	-766785.3737	-903907.6867	-817213.0144	-800582.0086	-1029617.486	-1091488.671	-1067253.344	-929530.4541	-777400.6085	-1010254.708	-1071450.482	-1045756.744	-907630.0295	-740938.7766	-969347.0032	-1025628.553	-1003164.976	-870128.8447	-729891.679	-899060.9441	-951288.9728	-942657.3372	-820067.511	-847391.7179	-1071957.523	-1131059.285	-1107167.674	-968043.838	-822986.8657	-1050995.064	-1109348.745	-1084191.687	-944773.5334	-784002.1571	-1007546.995	-1061165.659	-1039141.566	-904732.3291	-822771.7713	-968295.2571	-1135792.502	-981406.9175	-822922.0153	-894201.3648	-1114297.497	-1170629.899	-1147081.989
344	-586377.8951	-793684.7523	-871200.435	-871338.8588	-816063.9577	-685173.5395	-925073.7572	-996044.1364	-1007359.038	-911218.7691	-643187.7163	-879190.3958	-947779.315	-960214.9112	-868069.3315	-613475.1953	-835021.0351	-896081.1309	-902958.3761	-813960.7715	-688573.054	-852783.2954	-910981.1271	-890923.1135	-816964.8241	-744554.6679	-978569.3858	-1045397.088	-1053049.179	-951566.8204	-703408.6035	-933466.6554	-997888.5886	-1006779.488	-908869.3309	-671441.5318	-887612.455	-944923.4381	-948720.2654	-853801.2674	-790768.213	-911881.8386	-950761.7566	-910507.3008	-817865.6904	-803935.7337	-1032064.942	-1094750.049	-1098739.301
345	-567098.3778	-784018.9592	-868243.3347	-896233.4499	-800271.4103	-627400.8482	-878157.9776	-959205.0144	-987075.0528	-900074.7023	-574587.0183	-818104.0187	-898161.0305	-928555.5257	-844266.7072	-548085.8008	-772054.1411	-844148.4927	-867570.5516	-780893.9599	-675056.1031	-845592.4521	-910923.808	-916584.1249	-803167.3649	-693430.4449	-937140.5263	-1012933.658	-1035518.944	-941675.1397	-642528.4266	-879058.8373	-953772.4157	-978902.0786	-887338.2084	-613794.7829	-831639.2497	-898917.7213	-917663.466	-823735.2731	-783013.8247	-907165.945	-953604.2226	-936934.7448	-806063.3233	-759459.9792	-996123.0124	-1066662.302	-1083962.821
346	-627841.0584	-812751.975	-846729.9	-896858.8771	-811206.6326	-805765.6132	-1022614.988	-1066012.269	-1060125.007	-934371.039	-783899.1912	-1002871.937	-1041144.621	-1038220.292	-914067.0026	-745198.6011	-958599.9684	-991151.0887	-991996.865	-874061.6068	-718994.2794	-864500.0398	-882721.1058	-913058.206	-809530.2257	-851351.5396	-1064635.779	-1106665.364	-1099728.988	-971683.7218	-828297.236	-1043461.095	-1080520.153	-1076513.987	-950026.1761	-787474.5857	-997129.822	-1028678.617	-1028333.9	-907903.2526	-810147.5076	-916248.1009	-918712.2509	-929257.4687	-807853.8262	-896937.4035	-1106656.507	-1147318.474	-1139332.955
347	-588993.6206	-742151.0002	-821428.1187	-828160.8039	-740181.8438	-721811.29	-913521.3608	-944894.4173	-917766.1735	-776893.5903	-703061.7685	-901546.4362	-929417.7842	-903073.6012	-761785.1362	-689448.6531	-891723.6643	-921531.7261	-900449.8756	-764513.2119	-684453.8572	-804539.6135	-868595.2095	-859471.1522	-747405.6367	-777261.4215	-967959.4914	-999941.2109	-973828.2839	-832203.8092	-756349.9918	-953441.6491	-981943.3515	-956725.7271	-814933.9805	-737968.3049	-938466.436	-968660.4916	-948420.2879	-811917.8118	-779914.092	-866928.2273	-915762.2406	-890781.439	-754629.4296	-832711.4831	-1022397.56	-1054988.005	-1029890.387
348	-634947.4878	-794704.824	-826056.8815	-808346.822	-711135.8897	-997124.083	-1121067.9	-1084167.37	-996053.0639	-795568.1803	-1026893.54	-1180218.581	-1136317.04	-1045427.516	-838089.2876	-991109.4075	-1186795.512	-1157462.728	-1082335.845	-884228.7092	-700783.1686	-844775.8623	-870526.2907	-838809.8441	-707763.9784	-1020549.003	-1151275.037	-1122594.018	-1042414.244	-847802.1101	-1042944.574	-1201810.232	-1166360.853	-1083672.013	-883363.9372	-1002160.253	-1201077.241	-1179023.541	-1110905.53	-919851.4712	-766618.8462	-894846.905	-914995.6385	-869272.8038	-704392.0686	-1043973.86	-1181482.129	-1161020.649	-1088775.441
349	-586194.3745	-758940.1563	-808212.0528	-805982.6709	-715100.3231	-788687.301	-956072.14	-959669.1506	-910032.6414	-747251.5993	-785873.7249	-969484.0673	-967828.7231	-917343.049	-751701.0276	-770426.3411	-974324.2169	-979029.8002	-937080.3109	-777939.4596	-673131.2007	-819578.4567	-858213.427	-839652.5365	-720890.2082	-836267.6609	-1005659.158	-1012850.513	-966762.7413	-805667.4579	-829429.5128	-1014271.464	-1016344.693	-969589.9535	-806229.8002	-808551.6119	-1012483.714	-1020340.135	-981518.2934	-824639.2256	-760068.0253	-880216.7592	-908214.7393	-873322.3396	-726680.0941	-883847.9583	-1055246.121	-1066031.867	-1023492.85
350	-596657.6401	-840916.4802	-939440.8214	-979806.6038	-873198.1567	-682026.8015	-966225.3877	-1078201.907	-1138989.624	-1084094.512	-615421.2022	-883858.4143	-997007.5151	-1061511.521	-1010518.77	-559455.3471	-793628.3691	-893783.6197	-944275.1155	-885505.1411	-703313.171	-893196.6673	-970219.9105	-985082.3162	-864699.2889	-741507.8432	-1015083.615	-1118271.3	-1170023.037	-1104616.672	-678949.4887	-937129.5381	-1041293.102	-1096715.379	-1034392.31	-624045.0765	-849612.6275	-941734.5971	-984242.0671	-914245.6978	-809968.6947	-945476.8543	-1000998.944	-990357.9804	-856200.4282	-800988.8224	-1063941.779	-1158340.694	-1201056.421
351	-594540.2388	-765062.5769	-811266.8427	-806387.3812	-714421.6665	-824368.8191	-984317.151	-980981.5382	-924758.1579	-755522.7353	-827133.0113	-1005558.926	-996671.6119	-939269.353	-766489.5128	-808204.2551	-1010696.388	-1009575.07	-961946.0661	-796134.7212	-677864.8384	-823891.9069	-860321.2204	-839508.2791	-718643.1777	-867814.099	-1030586.599	-1031637.096	-979713.2409	-812880.3325	-865980.3626	-1046375.529	-1042025.402	-989119.2373	-819434.1065	-841694.7557	-1044768.339	-1047504.558	-1003667.614	-840938.2561	-761189.436	-882721.2395	-909375.5363	-872629.1146	-722864.6898	-911259.3163	-1076855.995	-1082292.644	-1034668.334
352	-586244.9497	-820873.481	-914360.4463	-950366.7156	-847508.6241	-662783.9959	-935202.3309	-1036283.479	-1085475.454	-1019270.793	-601036.7528	-860695.4492	-962187.3687	-1014675.792	-951954.0046	-555450.2551	-786028.526	-876298.907	-917254.7905	-848654.2945	-693359.198	-876427.3735	-949331.9753	-960952.8081	-843023.7522	-724571.8636	-987627.001	-1081164.547	-1122641.967	-1047218.091	-666119.6272	-916673.2689	-1010462.637	-1055213.889	-982590.3126	-620434.2579	-843281.2375	-926651.7149	-960788.7632	-882362.0527	-800473.4403	-931981.2659	-984303.4477	-971538.85	-838538.8863	-786359.6689	-1040051.609	-1126045.615	-1159808.456
353	-658275.5916	-773118.8902	-811201.224	-803027.4344	-709472.9395	-927181.7111	-1068592.115	-1051882.865	-979078.6654	-789368.4878	-953579.8773	-1123258.314	-1099011.24	-1022905.662	-827679.2456	-929632.5375	-1134981.64	-1120179.078	-1056697.087	-870364.3009	-725179.5805	-825012.3259	-855381.4436	-833489.7594	-708163.4828	-957460.0972	-1103822.282	-1093415.35	-1027156.656	-842332.8847	-976907.1453	-1150455.418	-1132721.611	-1063405.714	-874187.8281	-947913.341	-1155087.099	-1145768.994	-1087962.992	-907674.4424	-792083.5732	-876905.7596	-899561.6008	-863952.0218	-706854.027	-987738.4207	-1139052.356	-1134947.836	-1075234.654
354	-596742.5214	-841079.8649	-939645.2693	-980046.5892	-873407.5702	-682183.6633	-966478.2786	-1078543.613	-1139425.856	-1084622.936	-615538.4601	-884047.2321	-997291.3588	-1061893.312	-1010996.173	-559487.9954	-793690.3209	-893926.15	-944495.3773	-885805.5385	-703394.3129	-893333.3657	-970390.1829	-985279.0129	-864875.9815	-741645.9004	-1015307.433	-1118573.784	-1170409.273	-1105084.569	-679054.074	-937296.2916	-1041544.423	-1097053.687	-1034814.585	-624074.5109	-849664.2392	-941857.5484	-984433.2516	-914505.604	-810046.0972	-945586.8664	-1001135.041	-990511.3885	-856344.4	-801108.075	-1064136.525	-1158603.954	-1201392.662
355	-601738.2378	-770342.9379	-813901.4859	-806736.4288	-713836.3503	-855142.8075	-1008677.427	-999362.6834	-937458.3707	-762656.2838	-862717.6183	-1036672.155	-1021547.536	-958179.9784	-779244.0338	-840786.3073	-1042066.04	-1035919.234	-983391.8593	-811827.4608	-681947.4255	-827612.098	-862139.1142	-839383.8625	-716705.197	-895021.7338	-1052085.594	-1047839.828	-990882.5673	-819101.1697	-897504.1174	-1074064.096	-1064174.062	-1005962.522	-830822.3318	-870279.4903	-1072612.633	-1070932.867	-1022770.582	-854995.5665	-762156.6112	-884881.261	-910376.6807	-872031.2337	-719574.0449	-934900.5977	-1095493.71	-1096316.962	-1044306.775
356	-626142.8046	-788245.8197	-822834.1526	-807919.8626	-711851.8559	-959480.952	-1091270.102	-1061683.321	-980518.0034	-786842.3337	-983365.9993	-1142160.486	-1105888.496	-1022295.801	-822487.7966	-951254.63	-1148423.759	-1125238.214	-1056103.08	-865033.1521	-695789.2964	-840225.2776	-868302.6201	-838962.0321	-710134.5407	-987268.2802	-1124977.195	-1102774.632	-1028751.783	-840192.7035	-1004384.319	-1167941.227	-1139268.331	-1063069.095	-869433.7163	-967195.0453	-1167017.75	-1150365.738	-1087538.538	-902656.3917	-765435.7853	-892204.7394	-913771.0261	-870004.1392	-708417.227	-1015055.546	-1158684.241	-1143865.927	-1076985.578
357	-574434.4192	-776987.7458	-852402.1655	-855776.7711	-793882.6496	-658024.6437	-891903.0638	-957312.0629	-964044.9691	-861829.3052	-617066.2618	-848449.4665	-911245.6371	-919117.7652	-820299.5118	-595588.9907	-815093.1016	-871541.4514	-875322.7532	-779754.8835	-678282.2454	-839018.9608	-895876.7096	-879373.4357	-798141.0151	-720596.7959	-949233.4525	-1011144.655	-1014797.584	-907829.0752	-680180.4918	-906212.5501	-965498.9381	-970403.4013	-866506.3405	-655615.4298	-870204.4862	-923477.9845	-924654.795	-823872.1528	-782130.0716	-901050.1757	-939351.1912	-902970.0341	-802399.3807	-783168.8855	-1006563.771	-1064977.254	-1065550.183
358	-584631.5828	-758095.6767	-818403.3811	-825667.1047	-738832.2589	-717703.4029	-909885.2208	-942495.4249	-918657.3618	-779622.0068	-700357.7351	-901544.1246	-929535.8577	-905938.3157	-766430.3288	-687844.6745	-895158.3067	-923459.2043	-903796.2942	-769285.0398	-679091.0479	-819386.8762	-865496.2182	-855747.7862	-744987.7694	-773134.5895	-964302.4035	-997434.5652	-974349.4203	-834436.9262	-753551.8144	-953245.015	-981833.042	-959116.763	-819002.8952	-736390.8862	-941712.5308	-970395.4698	-951352.8537	-816191.5838	-773550.5167	-880678.0738	-912588.9919	-885828.4043	-751143.2807	-828565.7137	-1018719.524	-1052373.706	-1030041.479
359	-621111.4571	-844806.9772	-927930.1463	-962065.1109	-880438.3331	-780248.2881	-1035462.118	-1117594.981	-1140157.946	-1061471.045	-736814.4952	-981841.4583	-1063301.82	-1089989.316	-1014310.419	-679641.1273	-900508.5465	-973056.4936	-993833.053	-918271.8783	-717201.8339	-891260.386	-955220.2617	-965494.5608	-868363.7423	-828068.6241	-1075598.466	-1152058.18	-1169318.937	-1083459.987	-786579.8887	-1024095.937	-1099797.779	-1121166.719	-1037663.786	-730227.0688	-944686.5669	-1012147.943	-1028288.274	-944770.0202	-813292.2065	-937713.7947	-982510.306	-968923.9653	-856289.143	-875888.8977	-1115734.752	-1186521.396	-1198479.927
360	-618044.1854	-756162.6062	-804066.4567	-803169.5968	-712668.4866	-810234.8741	-975080.9417	-978951.2797	-926957.3756	-759010.6161	-815898.0547	-1000559.729	-998237.9338	-944403.7296	-773181.5437	-801734.4865	-1009449.62	-1012736.226	-967702.8205	-803654.8607	-698738.1731	-814544.2172	-852046.6326	-835780.5617	-716827.7254	-854472.3243	-1021664.736	-1029360.864	-981424.9235	-815879.5554	-855291.0697	-1041477.905	-1043133.95	-993552.7722	-825489.5116	-835807.7553	-1043662.242	-1050249.917	-1008724.776	-847838.4877	-779432.1632	-872925.827	-900026.7459	-868391.464	-720986.965	-898709.7121	-1068248.448	-1079770.448	-1035892.476
361	-591106.2848	-781132.6031	-776807.6337	-859022.37	-773467.3959	-696094.4406	-918248.4351	-973346.5234	-956067.3246	-825085.6151	-666512.2868	-891769.9004	-944979.2385	-927430.283	-796846.2287	-649117.3543	-870479.5356	-919908.0584	-904522.1322	-778360.1514	-691370.1794	-851553.3475	-903837.2788	-897027.7627	-781992.7405	-754741.448	-973047.7327	-1026019.616	-1008429.669	-875434.2641	-724277.6541	-945355.0863	-996411.1778	-978699.682	-846161.8337	-702855.74	-920022.2293	-967421.711	-951829.9011	-823639.5163	-791634.0697	-921974.0918	-1030866.857	-935033.0887	-790518.0893	-813388.393	-1027846.968	-1078692.709	-1060792.004
362	-612756.897	-804098.4839	-772080.7701	-880191.9236	-794099.4262	-745374.5912	-970774.1444	-1029066.672	-1008506.709	-874345.6132	-718811.2665	-947651.6599	-1004627.693	-983237.3609	-849095.9125	-692423.6883	-917109.0418	-969769.7024	-951045.6975	-821641.6165	-709538.3246	-873959.664	-926217.2296	-918548.3355	-799950.1919	-798438.6969	-1019697.2	-1075560.158	-1054998.116	-919112.3192	-770832.521	-995178.7556	-1049676.656	-1028453.562	-892670.7104	-741127.352	-961302.1032	-1011634.778	-993009.2688	-861885.8465	-806319.7462	-943820.844	-1080353.621	-956904.6789	-805800.9635	-851502.7401	-1068620.193	-1122053.644	-1101489.511
363	-628849.5022	-814815.5196	-890277.2942	-901389.6001	-813984.8376	-828245.7566	-1040450.83	-1082197.223	-1077300.646	-956847.4868	-809963.9786	-1025127.197	-1064126.235	-1060087.221	-940288.0067	-767019.1909	-978384.8908	-1015109.445	-1011872.482	-896089.5732	-715682.0533	-864913.9983	-922342.4822	-914722.4828	-807057.1944	-870517.7353	-1079612.13	-1120154.345	-1114087.917	-990847.0397	-850982.7528	-1062762.568	-1100577.771	-1095452.081	-972857.4688	-806592.3569	-1014579.025	-1050194.313	-1045871.478	-927219.8189	-802514.6083	-915012.4769	-954407.6157	-928055.3031	-800129.5512	-912789.6355	-1118773.367	-1158111.483	-1150875.189
364	-604404.2307	-748148.1395	-830503.0615	-835117.3428	-746058.1797	-765487.1533	-951020.6647	-978072.0524	-945743.9928	-799734.7563	-752020.8781	-945612.3833	-969130.7533	-937469.1636	-790535.4245	-732825.0531	-932180.0293	-958850.531	-933696.4088	-792609.4598	-695936.8004	-807860.466	-875212.5957	-864801.2265	-750938.0842	-815909.4441	-1001012.902	-1029219.083	-998508.0784	-852316.0411	-799801.4358	-992552.9488	-1017245.621	-987317.5199	-840520.0448	-776152.5709	-974179.2305	-1001695.029	-977902.6576	-836890.3838	-787469.3679	-867572.793	-919922.071	-894485.049	-755817.9888	-866331.6629	-1051005.077	-1080366.114	-1051272.154
365	-618037.7126	-837945.2491	-921030.9692	-912590.9081	-874862.2653	-757139.9499	-1013002.774	-1098715.284	-1122176.158	-1042140.573	-712430.5809	-960678.5841	-1044622.946	-1069155.403	-994697.7761	-660888.0238	-887846.0874	-961131.0196	-976215.0045	-904633.8875	-715851.9741	-889269.8533	-951019.9822	-921539.0492	-866863.0582	-808062.2986	-1056333.205	-1136193.586	-1154446.673	-1067507.025	-764981.7824	-1005711.955	-1083747.214	-1103205.375	-1021165.329	-713393.4312	-933757.5737	-1001771.139	-1012513.118	-933137.4937	-813666.2357	-940594.4573	-981008.9327	-930487.1199	-858863.8512	-858984.5847	-1099663.557	-1173671.903	-1186717.157
366	-580234.2456	-769600.0905	-779181.2685	-848391.8985	-763106.8462	-671347.9933	-891872.2029	-945366.1763	-929734.4411	-800349.2877	-640249.9089	-863708.3991	-915026.2592	-899406.2837	-770608.6051	-627370.7099	-847064.132	-894869.6094	-881159.9277	-756625.9952	-682246.8906	-840301.8248	-892598.996	-886221.0239	-772975.2534	-732798.5025	-949622.3057	-1001142.411	-985044.9265	-853500.9568	-700899.7313	-920335.7066	-969663.4643	-953715.3478	-822807.0053	-683637.3242	-899293.1891	-945219.7428	-931151.331	-804433.7959	-784259.5323	-911003.5592	-1006016.658	-924050.0834	-782843.6639	-794248.9492	-1007372.346	-1056918.646	-1040355.405
367	-613374.1627	-833903.6035	-925381.4834	-823770.6811	-876713.0231	-733041.314	-989402.785	-1084575.881	-1124946.614	-1025513.65	-687860.9611	-939241.0232	-1034243.683	-1079908.773	-982090.5672	-642644.9962	-876212.8303	-962303.9017	-1000194.239	-905194.5284	-712206.2799	-889228.3209	-975568.2762	-984657.9865	-893203.5606	-787059.1449	-1035980.592	-1124810.405	-1158909.616	-1054169.63	-743195.331	-987088.4728	-1075552.37	-1114846.225	-1011332.2	-697085.8758	-923888.0862	-1003900.726	-1036012.454	-935113.2228	-811038.4047	-944553.046	-1025755.014	-1145545.229	-909694.0981	-841076.9057	-1082558.321	-1165044.929	-1192872.603
368	-601959.6805	-815468.1238	-895725.1719	-891641.5843	-845002.2994	-720592.732	-968349.1514	-1046575.059	-1063867.757	-975653.6152	-677266.4807	-919295.8534	-995442.151	-1013831.373	-930391.1456	-636810.0273	-861019.5625	-928096.2684	-939012.5659	-858586.7092	-701998.7246	-870740.6231	-930686.7634	-905991.1392	-841522.8804	-775810.7634	-1016841.847	-1090083.75	-1102953.257	-1008628.28	-733712.6337	-969023.1069	-1040145.013	-1054236.726	-964137.2476	-692088.6975	-910323.3673	-972901.7636	-980116.7366	-892847.6093	-802037.7687	-926013.1224	-965648.2925	-920340.6252	-838043.4614	-831028.7322	-1065334.468	-1133592.452	-1142038.732
369	-641847.3178	-834956.1397	-765729.6125	-908635.9794	-821821.2494	-811588.8999	-1041349.284	-1103933.958	-1078965.861	-940532.8442	-789081.7657	-1022736.091	-1084773.17	-1058221.447	-919300.1763	-750611.3954	-979761.864	-1036765.323	-1013556.174	-879795.9089	-733949.5968	-904065.4721	-956287.6118	-947464.0313	-824078.3696	-857151.6489	-1082376.842	-1142124.336	-1117568.897	-977799.482	-833385.0555	-1062123.352	-1121245.773	-1095304.387	-955161.4512	-792550.2535	-1016766.997	-1071040.8	-1048339.119	-913274.7786	-826051.8677	-973174.8044	-1146845.541	-986292.0125	-826335.4979	-902714.3355	-1123404.337	-1180314.714	-1156171.917
370	-604085.8325	-772483.7542	-829683.3047	-834246.267	-746371.7402	-776029.3327	-959920.6156	-987080.5383	-957380.9135	-812009.1888	-766473.5517	-961991.6447	-984058.6057	-954228.1586	-807664.161	-746727.3741	-951982.4189	-975396.8995	-950696.0726	-809670.6126	-692770.7159	-829679.6347	-873376.2423	-861620.6404	-748899.1636	-824556.1497	-1008230.954	-1036628.495	-1008405.839	-862889.2393	-812075.9928	-1006820.8	-1030217.066	-1002005.663	-855673.4485	-788161.4275	-991956.6891	-1016381.742	-992929.1379	-852099.7271	-781455.6044	-886875.5127	-917069.1161	-888994.95	-751426.5881	-873082.9042	-1056541.229	-1086176.452	-1059430.765
371	-587878.7439	-795782.9423	-873562.6754	-873294.432	-818851.3197	-688585.1417	-929242.0744	-1000911.311	-1012801.998	-917425.18	-646470.2075	-883053.3824	-952370.2338	-965379.2875	-874072.2136	-615722.8232	-837525.2321	-899164.8521	-906431.1417	-818259.1741	-689866.2243	-854512.9582	-912879.1882	-892374.4766	-819330.2738	-747565.2776	-982255.8169	-1049701.34	-1057855.976	-957063.0214	-706327.5095	-936891.4784	-1001958.758	-1011350.603	-914192.7766	-673430.2817	-889799.9864	-947618.3306	-951744.3962	-857562.2393	-791853.7047	-913242.9741	-952195.6385	-911454.4537	-819809.2279	-806545.3509	-1035269.487	-1098491.378	-1102909.933
372	-683630.9952	-682167.6271	-873120.1565	-865515.0995	-767720.7472	-926871.2285	-1109956.205	-1100266.631	-1036111.179	-868096.5667	-931821.6038	-1129785.166	-1111515.393	-1045453.095	-874511.5426	-897915.7189	-1106864.716	-1095039.088	-1038390.013	-874616.7591	-783241.1258	-902518.1099	-933903.7922	-894222.79	-767369.8656	-960324.2274	-1143488.403	-1138381.321	-1078844.617	-912824.4255	-960943.788	-1158318.359	-1144914.799	-1083784.693	-915382.8366	-923111.887	-1130736.809	-1123244.771	-1071015.877	-909740.4032	-882851.2475	-1122868.593	-994687.3742	-922930.418	-767018.985	-993777.1461	-1177020.556	-1176496.01	-1121578.055
373	-595836.7621	-835484.828	-942262.9654	-1001300.052	-810274.398	-671171.3952	-954812.1652	-1070739.978	-1146424.23	-1120714.777	-604134.9436	-875404.0664	-992508.7389	-1073589.837	-1058799.906	-549826.935	-790912.3727	-895393.4794	-963827.5883	-943651.4763	-701756.328	-890788.9859	-976617.0184	-1023459.901	-961915.2377	-731965.687	-1005237.857	-1112282.909	-1178001.829	-1139726.71	-668663.6682	-929810.3495	-1037776.472	-1108679.365	-1080249.59	-614979.1467	-847371.6907	-943531.2254	-1002688.236	-968899.6814	-807675.8939	-946093.1437	-1010971.031	-1045619.688	-1113556.077	-792759.9089	-1055663.487	-1153825.855	-1209579.428
374	-595703.8421	-766284.5572	-824823.276	-830549.879	-743123.3055	-750899.2254	-938362.5395	-967870.7514	-940696.6187	-798054.9602	-737987.1209	-935947.4365	-960567.1241	-933422.1648	-789898.2955	-721357.379	-927499.3796	-953019.2048	-930488.9972	-792270.2252	-686876.7417	-825244.9326	-869981.0825	-859090.2829	-747213.9139	-802400.8351	-989304.0514	-1019741.535	-993732.4089	-850630.3746	-786860.4689	-983737.3238	-1009370.494	-983526.7008	-839873.7015	-765855.7522	-970308.6658	-996568.2569	-975015.7247	-836628.4694	-778049.6458	-884205.3057	-915138.8254	-887630.6232	-751304.5232	-853902.3823	-1040245.501	-1071612.318	-1046768.199
375	-611477.0135	-777950.1632	-833968.8442	-837505.7164	-749236.1874	-798188.8871	-978930.3777	-1004019.595	-972093.009	-824313.9309	-791592.6889	-984957.247	-1004773.231	-972574.7397	-823329.9781	-769098.46	-973571.3933	-995129.3956	-968514.5316	-825014.1536	-697967.9815	-833590.1243	-876370.0706	-863851.8921	-750385.2051	-844092.5525	-1024920.565	-1051519.3	-1021344.768	-873699.0212	-834310.8671	-1027175.65	-1048599.429	-1018300.284	-869605.556	-807830.4175	-1011045.766	-1033853.136	-1008725.061	-865742.175	-784458.9551	-889230.0827	-918771.2331	-890198.004	-751534.224	-889996.1555	-1070910.69	-1099019.004	-1070596.527
376	-591071.6666	-830164.2483	-925986.2477	-964013.3334	-859416.7954	-671703.84	-949582.8135	-1055714.421	-1110281.507	-1049319.294	-607704.5459	-871432.451	-978327.9609	-1036386.108	-979101.2192	-557306.7825	-789551.3707	-884403.8016	-929779.8397	-865736.2011	-697973.2802	-884200.6415	-959014.4057	-972137.8429	-853071.2688	-732422.3976	-1000354.288	-1098365.077	-1144605.072	-1073824.731	-672066.8039	-926155.6041	-1024753.845	-1074451.563	-1006602.702	-622108.0232	-846216.1012	-933643.2608	-971660.3491	-897141.4539	-804874.8873	-938237.0348	-992042.5077	-980262.3029	-846725.7487	-793140.8926	-1051125.7	-1141015.733	-1178928.61
377	-592034.0338	-803297.7826	-881473.809	-908950.2819	-826480.3842	-708752.929	-950042.5321	-1020313.884	-1032417.211	-939011.1947	-667304.7875	-902562.1105	-971250.6846	-986499.6235	-895559.6378	-631356.8131	-849469.1918	-911433.7415	-923033.3578	-833375.5057	-692582.8576	-858269.629	-918342.4156	-923650.6695	-823655.3782	-765105.9183	-1000254.116	-1066306.814	-1074508.279	-975403.7432	-724797.8644	-953935.6864	-1018358.686	-1029725.971	-932653.3271	-687423.5218	-900145.6273	-958310.3114	-966489.8992	-870588.8399	-793131.6784	-913241.4754	-955210.954	-938351.006	-820830.3665	-821458.8452	-1050465.637	-1112299.756	-1116599.346
378	-609070.9471	-864810.3916	-969339.9524	-1014902.852	-903823.4841	-704966.7761	-1003208.983	-1128174.228	-1202785.608	-1161372.975	-632569.3724	-911471.7386	-1038517.744	-1117345.918	-1080335.731	-564229.9476	-802688.3894	-914627.7145	-976486.924	-929436.2341	-715179.626	-913187.8879	-995121.0976	-1013847.888	-890539.4012	-761697.7755	-1047815.537	-1162507.468	-1226507.551	-1173043.389	-694244.3841	-961516.1221	-1078047.102	-1146190.655	-1096147.156	-628349.6509	-857160.4836	-959715.3916	-1012201.514	-952255.2283	-821288.2963	-961565.3842	-1020902.189	-1012792.878	-877255.3269	-818428.7123	-1092422.029	-1196840.708	-1250229.461
379	-560023.3618	-773042.5535	-852352.1253	-875280.9591	-797448.5378	-618970.2356	-862298.7558	-934556.6695	-951579.3562	-855163.0005	-569893.5264	-806208.2399	-877247.881	-897166.4965	-803779.2066	-549775.6156	-768057.0836	-832550.9956	-848198.9781	-755440.7967	-668588.5278	-835319.6067	-895737.405	-898093.5466	-802416.0504	-685977.7602	-922975.9011	-990838.8518	-1003661.547	-901427.3947	-638451.299	-868482.0783	-935071.9654	-950808.4406	-851142.479	-615519.1898	-828298.0278	-888818.4975	-900766.8083	-801647.8044	-777153.6953	-897596.6569	-939122.6193	-920906.0624	-807383.5691	-752985.2222	-983652.99	-1047121.028	-1055743.744
380	-595583.4186	-808474.6722	-894750.1632	-819203.0223	-841307.5709	-695637.2605	-942387.6883	-1026660.012	-1055999.147	-951346.2268	-652183.557	-895572.2313	-978949.7479	-1012662.547	-909573.7555	-618534.8227	-847395.1284	-923330.8086	-951207.2453	-851111.5399	-696793.5096	-867525.5994	-946220.1799	-952240.6804	-857585.2822	-753992.3272	-994284.0013	-1073340.771	-1097567.042	-988177.3277	-711455.8516	-948286.8186	-1026303.898	-1054847.428	-946720.1679	-675789.952	-898648.652	-969593.2992	-992765.0251	-887458.1542	-798003.6067	-926576.5326	-997690.14	-1085278.276	-873862.9934	-812347.3255	-1046180.24	-1120021.531	-1139134.926
381	-606395.0678	-797350.1754	-773469.7146	-873971.4489	-788036.8977	-730894.0814	-955339.9576	-1012693.829	-993097.8883	-859871.025	-703443.7021	-931231.3293	-987100.5544	-966838.9748	-833742.8332	-679698.5285	-903407.399	-955118.3262	-937375.1844	-808923.7642	-704199.7856	-867375.7781	-919641.0911	-912224.7171	-794673.5633	-785598.6704	-1005989.692	-1061003.135	-1041314.415	-906277.9326	-757152.8102	-980538.538	-1034025.095	-1013833.851	-879004.5135	-729881.598	-949172.3996	-998643.1835	-980909.098	-850647.5213	-802004.498	-937401.3809	-1065812.4	-950477.9174	-801310.2343	-840303.1969	-1056639.363	-1109312.44	-1089530.93
382	-608958.9678	-864594.8467	-969070.235	-1014586.252	-903547.2157	-704759.8367	-1002875.357	-1127723.432	-1202210.11	-1160675.853	-632414.6803	-911222.6413	-1038143.284	-1116842.241	-1079705.919	-564186.8763	-802606.6598	-914439.6818	-976196.3441	-929039.9357	-715072.5798	-913007.5489	-994896.4662	-1013588.396	-890306.2999	-761515.6439	-1047520.265	-1162108.417	-1225998.009	-1172426.117	-694106.4102	-961296.1329	-1077715.548	-1145744.343	-1095590.072	-628310.8197	-857092.395	-959553.1885	-1011949.294	-951912.3478	-821186.1832	-961420.251	-1020722.643	-1012590.495	-877065.3925	-818271.3886	-1092165.111	-1196493.403	-1249785.875
383	-654261.8371	-767550.5517	-859863.0233	-857623.6796	-765069.7594	-906790.7093	-1072341.335	-1085410.923	-1036260.014	-873632.2762	-910417.204	-1088177.969	-1097613.245	-1048748.367	-883550.5974	-873159.762	-1063067.613	-1079587.236	-1041258.183	-883508.6301	-733087.3131	-818604.3466	-896621.679	-882045.4982	-762366.5337	-940946.5381	-1107949.872	-1123941.137	-1078354.072	-917384.7007	-940378.933	-1119088.873	-1131458.276	-1086290.471	-923298.0735	-899689.2836	-1089720.046	-1108570.937	-1073286.317	-917683.5944	-811912.785	-869658.1424	-933380.2783	-906467.2563	-759663.3081	-975102.2881	-1143558.347	-1162471.351	-1120448.115
384	-635554.8157	-820328.5607	-851472.3326	-904559.3808	-818782.8037	-825471.7943	-1042586.084	-1085709.836	-1080051.956	-954041.0535	-804894.785	-1024124.592	-1061980.772	-1059431.058	-935038.2316	-762491.6106	-975955.6772	-1007814.604	-1009276.41	-891317.9202	-725203.283	-870415.9363	-885822.7318	-919036.7028	-815686.4967	-868772.742	-1082281.72	-1124034.674	-1117333.591	-989071.0358	-846947.717	-1062331.31	-1098981.038	-1095345.05	-968653.9055	-802733.0498	-1012419.911	-1043296.48	-1043552.473	-923126.9665	-814851.7582	-920503.3079	-920173.0706	-933513.9583	-812590.1976	-912073.6272	-1121977.293	-1162359.528	-1154615.211
385	-592745.7674	-705715.324	-822057.1766	-827754.0479	-738266.6046	-707723.8685	-909401.3333	-934037.3051	-903648.7018	-763248.7305	-686837.664	-895689.3312	-914903.3247	-884499.4998	-743799.5279	-677341.8551	-888537.6305	-908826.9761	-882620.3594	-746913.8806	-698315.59	-835717.7955	-879863.4874	-861559.3644	-747589.0259	-765425.4406	-965260.8261	-990881.128	-961618.3887	-820312.0949	-742564.9308	-949143.5934	-969470.8906	-940372.1054	-798978.3392	-727948.6966	-936575.7792	-957804.0955	-932716.2855	-796259.5159	-803885.4091	-965720.2671	-937669.7392	-895364.6185	-756911.4476	-823126.9433	-1021120.263	-1047724.951	-1019588.076
386	-610930.3328	-797011.6668	-871126.0052	-882833.4348	-796046.5129	-778696.3159	-991172.6262	-1033860.489	-1028249.007	-907381.8661	-756771.883	-972066.203	-1011884.825	-1007196.081	-887122.3048	-723140.7829	-934748.1346	-972272.6695	-968393.5823	-852256.2045	-702039.9181	-851239.3987	-907706.1249	-900667.0831	-793377.2281	-826847.7047	-1036219.552	-1077679.383	-1070907.343	-947255.4381	-803820.6483	-1015736.722	-1054349.378	-1048585.077	-925720.0289	-767901.9965	-976132.1699	-1012521.813	-1007572.237	-888571.6522	-793149.5066	-905467.1306	-944286.1886	-918500.669	-790707.9433	-874999.0181	-1081266.416	-1121498.289	-1113565.679
387	-604649.5934	-790771.3462	-864413.403	-876329.4258	-789759.0595	-761329.0418	-973900.4218	-1016918.273	-1011056.215	-890043.9712	-738127.8439	-953468.1155	-993574.0051	-988657.5281	-868487.5168	-707761.2281	-919453.2797	-957258.2109	-953154.0566	-836892.4362	-697258.296	-846446.3977	-902576.0241	-895740.6102	-788582.3461	-811541.187	-1021010.283	-1062791.741	-1055772.381	-931976.4101	-787290.1449	-999253.9776	-1038146.145	-1032158.008	-909198.1705	-754340.8729	-962656.3958	-999317.4528	-994148.2022	-875025.3175	-789867.0016	-902121.4492	-940738.5886	-915151.7321	-787405.6326	-861753.2578	-1068120.082	-1108665.22	-1100488.548
388	-604372.7664	-702702.8537	-828589.6927	-832584.8407	-742034.6899	-735759.5151	-935058.4323	-955303.1174	-920594.7019	-776661.9739	-718178.5989	-925637.3447	-940056.0186	-905090.3849	-760521.5904	-705559.9951	-916468.3388	-932649.1976	-902548.0599	-763250.9825	-709180.1621	-844263.5978	-886776.8944	-865738.0151	-750119.6	-790358.9534	-988061.5815	-1009750.912	-976615.2068	-832147.25	-770502.2623	-975903.4403	-991915.5298	-958718.9594	-813870.0328	-752916.0347	-961414.9104	-978969.0153	-950409.0309	-810777.1905	-813987.5538	-985824.3419	-944964.0377	-898891.1269	-758204.5106	-844958.3209	-1041064.676	-1064198.706	-1032635.712
389	-590995.132	-742929.9014	-822606.7613	-829064.3107	-740945.0552	-727483.8583	-918391.725	-949203.4884	-921399.8989	-779860.1733	-709420.5185	-907269.6681	-934575.6566	-907540.8553	-765519.1889	-695082.3275	-896978.0881	-926378.6474	-904767.8951	-768162.3186	-685945.248	-804970.9218	-869454.6677	-860163.4158	-747864.4267	-782280.98	-972252.4284	-1003743.786	-977033.6658	-834815.9615	-761993.4128	-958521.3774	-986528.3676	-960698.9522	-818257.0676	-742927.6312	-943104.7705	-972950.9773	-952249.4225	-815161.2193	-780895.3621	-867011.9427	-916302.5144	-891262.4594	-754783.7982	-837078.0314	-1026113.069	-1058284.083	-1032667.425
390	-617590.7359	-802683.9312	-840427.9823	-886626.1667	-801139.1399	-779579.3202	-996076.6673	-1039837.422	-1033645.349	-908232.8055	-755999.4796	-974630.6344	-1013456.783	-1010034.65	-886199.6678	-722219.0188	-935537.069	-969008.0012	-969035.1746	-851130.7874	-710743.5286	-856638.7804	-878599.5518	-905113.7612	-801349.5481	-828201.6097	-1041187.208	-1083584.391	-1076335.349	-948578.824	-803513.796	-1018385.664	-1055988.655	-1051490.585	-925272.9691	-767198.5815	-976811.7939	-1009253.867	-1008110.905	-887673.4258	-803896.3276	-910593.6264	-916771.0603	-923601.29	-801559.9628	-876823.8368	-1086297.686	-1127331.373	-1119025.335
391	-609645.2044	-826212.5036	-907821.6964	-901655.6536	-859275.7801	-738062.8125	-989694.2069	-1071498.815	-1091739.987	-1007435.31	-694075.4116	-939077.3766	-1018951.258	-1040277.032	-961130.613	-648319.6459	-873843.0161	-943887.3408	-956795.8511	-880597.9035	-708620.7714	-879597.8539	-940406.3259	-913423.2573	-853635.8393	-791227.4476	-1035719.268	-1112124.895	-1127567.829	-1036773.142	-748659.7234	-986560.8888	-1060987.474	-1077644.424	-991397.467	-702272.6577	-921525.2452	-986701.7282	-995602.6594	-912106.7367	-807596.3383	-932983.2041	-972990.893	-925190.7914	-847995.8985	-844392.0201	-1081744.252	-1152750.989	-1163395.643
392	-590249.4723	-706362.0958	-820654.6575	-826716.8857	-737457.6037	-701704.6672	-903892.8018	-929471.5747	-900010.4271	-760368.9321	-680108.8234	-889259.5482	-909503.088	-880078.675	-740209.3321	-671283.4728	-882540.9592	-903712.3894	-878341.919	-743406.3351	-695982.9865	-833883.0277	-878379.1917	-860662.2159	-747045.7163	-760072.2617	-960365.5462	-986829.8205	-958398.5997	-817771.109	-736566.8375	-943398.304	-964652.0683	-936433.0699	-795781.1202	-722588.2554	-931242.8639	-953260.0265	-928917.6859	-793142.5982	-801716.4974	-961403.9595	-936103.6668	-894607.4837	-756633.8293	-818439.7871	-1016838.235	-1044188.066	-1016786.772
393	-591421.7242	-777628.6033	-850275.9874	-862631.3285	-776517.05	-724751.8152	-937523.4214	-981236.2625	-974846.4638	-853528.6202	-698861.6219	-914298.672	-955009.5762	-949613.4707	-829240.7786	-675370.3383	-887240.7764	-925636.2505	-921058.0821	-804534.7942	-687187.7187	-836351.8554	-891771.5155	-885364.9625	-778483.842	-779304.1207	-988978.0318	-1031436.87	-1023896.63	-899797.2398	-752475.2417	-964539.66	-1004020.504	-997560.947	-874401.4745	-725779.7819	-934275.0598	-971507.7424	-965875.8343	-846495.3738	-782953.7157	-895075.1074	-933266.9859	-908098.534	-780450.6341	-833856.3541	-1040432.58	-1081637.487	-1072946.796
394	-615033.035	-800171.7132	-838855.5029	-884072.8604	-798627.0594	-773045.213	-989454.7207	-1033306.171	-1027038.041	-901710.6903	-749037.8334	-967583.753	-1006548.004	-1003001.658	-879246.1004	-716485.0627	-929782.3233	-963482.7707	-963305.6829	-845408.9988	-708684.7687	-854677.208	-877571.1253	-903131.432	-799308.2731	-822425.1479	-1035336.228	-1077825.135	-1070498.075	-942813.5987	-797329.7342	-1012128.743	-1049867.459	-1045246.646	-919096.4511	-762139.2329	-971741.9594	-1004406.926	-1003064.783	-882625.5995	-802336.5085	-909182.6997	-916286.6868	-922189.9379	-799989.4932	-871805.0203	-1081217.673	-1122344.112	-1113958.097
395	-629779.5535	-761108.6981	-806147.6447	-803128.1285	-711736.356	-844347.8793	-1002357.842	-1000225.182	-942160.9833	-767865.9068	-856059.3865	-1036350.5	-1027633.174	-967302.4833	-789078.3429	-839041.9246	-1046066.894	-1044076.951	-993662.1535	-823113.7836	-706451.0441	-817597.7299	-853019.3859	-835112.3422	-714300.3945	-884513.5168	-1045629.821	-1048045.345	-994764.7185	-823595.904	-890766.0764	-1073266.285	-1069266.374	-1013928.644	-839694.6493	-868508.5835	-1076164.504	-1078112.516	-1031838.302	-865292.4376	-783122.5376	-874086.7602	-899891.0646	-867096.4934	-716864.4338	-924679.0917	-1088901.714	-1095865.509	-1047368.46
396	-586626.6906	-759571.2292	-819560.1805	-826546.9307	-739605.4616	-723684.9503	-915016.5422	-947067.799	-922628.6103	-782943.4363	-707138.1652	-907743.2493	-935127.3743	-910890.624	-770659.0162	-693883.3208	-900985.837	-928785.6139	-908606.0461	-773426.735	-680493.9502	-820442.438	-866304.3449	-856350.0699	-745388.8979	-778408.0674	-968807.4446	-1001454.053	-977842.0364	-837354.8198	-759553.6931	-958739.417	-986795.009	-963515.1839	-822763.6009	-741700.1535	-946865.2617	-975111.5382	-955616.6609	-819874.1014	-774361.2137	-881313.6449	-913048.4458	-886153.1457	-751172.3349	-833131.122	-1022598.284	-1055840.307	-1033055.463
397	-671263.7185	-778592.981	-813504.5803	-802981.5394	-708441.3034	-964936.3039	-1098780.844	-1075427.771	-995905.2691	-799169.087	-998028.4599	-1162869.775	-1131544.443	-1048248.874	-845273.0394	-970922.5713	-1175507.835	-1154865.447	-1085427.598	-891900.4776	-733715.806	-828391.8032	-856458.0391	-832750.2071	-705366.3575	-990708.2083	-1130345.656	-1114094.414	-1041920.484	-850872.959	-1016169.134	-1185637.231	-1161643.69	-1085956.725	-889909.3743	-984105.0059	-1191059	-1176605.945	-1113543.903	-926991.6138	-796167.8977	-878190.6233	-899411.4354	-862518.8121	-702291.4127	-1016480.05	-1161910.372	-1152761.056	-1087935.707
398	-675619.7859	-684243.2727	-868619.1366	-862186.5972	-765124.4694	-907554.1689	-1092278.007	-1085614.107	-1024435.083	-858854.6032	-910227.1417	-1109150.452	-1094184.739	-1031265.609	-862989.7438	-878472.918	-1087619.961	-1078625.153	-1024659.473	-863360.205	-775755.2421	-896629.9	-929140.3317	-891343.6253	-765626.255	-943144.5932	-1127778.276	-1125379.704	-1068511.542	-904669.7929	-941694.4691	-1139880.348	-1129450.043	-1071143.384	-905122.1946	-905908.9466	-1113622.206	-1108661.764	-1058825.26	-899737.467	-875890.69	-1109016.527	-989661.4726	-920500.5909	-766128.0416	-978734.9382	-1163278.5	-1165145.3	-1112588.001
399	-614084.5909	-800145.626	-874497.1496	-886099.8214	-799204.1428	-787418.3565	-999846.9217	-1042369.061	-1036883.421	-916089.1521	-766135.1293	-981406.372	-1021080.725	-1016506.351	-896480.9051	-730864.5685	-942429.3829	-979813.0997	-976047.0437	-859972.062	-704441.3026	-853646.4978	-910282.5193	-903141.2133	-795785.2719	-834534.8103	-1043857.819	-1085156.124	-1078508.291	-954928.7381	-812122.4532	-1024014.541	-1062486.825	-1056834.937	-934017.4922	-774712.5456	-982899.8554	-1019153.191	-1014313.938	-895374.7739	-794798.0176	-907147.3695	-946067.8333	-920182.5428	-792366.4009	-881651.188	-1087868.653	-1127943.2	-1120133.161
400	-603836.3896	-702841.825	-828288.3346	-832361.9866	-741860.8605	-734466.1745	-933874.8189	-954322.0829	-919812.949	-776043.1941	-716732.7788	-924255.7828	-938895.6745	-904140.4861	-759750.1682	-704258.2357	-915179.8393	-931550.2309	-901628.7551	-762497.3193	-708678.9576	-843869.3628	-886457.9651	-865545.2456	-750002.8595	-789208.7205	-987009.737	-1008880.411	-975923.3736	-831601.2706	-769213.4573	-974668.955	-990880.1136	-957872.5823	-813183.0492	-751764.2414	-960269.0315	-977992.6352	-949592.8291	-810107.4611	-813521.5216	-984896.9006	-944627.5371	-898728.442	-758144.859	-843951.1958	-1040144.601	-1063438.739	-1032033.798
401	-609499.0807	-865634.49	-970371.1702	-1016113.318	-904879.7483	-705757.9734	-1004484.543	-1129897.768	-1204985.924	-1164038.301	-633160.8109	-912424.1192	-1039949.428	-1119271.64	-1082743.711	-564394.623	-803000.8685	-915346.6251	-977597.9058	-930951.4128	-715588.8987	-913877.3829	-995979.9369	-1014840.009	-891430.6239	-762394.124	-1048944.458	-1164033.169	-1228455.696	-1175403.419	-694771.9034	-962357.2127	-1079314.744	-1147897.052	-1098277.074	-628498.1152	-857420.8083	-960335.5473	-1013165.832	-953566.1729	-821678.7082	-962120.2758	-1021588.65	-1013566.655	-877981.5081	-819030.2122	-1093404.31	-1198168.569	-1251925.433
402	-641261.4875	-834334.7204	-765857.5137	-908063.1658	-821262.9803	-810255.4593	-1039928.024	-1102426.262	-1077546.937	-939199.9489	-787666.6405	-1021224.022	-1083159.18	-1056711.399	-917886.3849	-749439.5966	-978500.1456	-1035416.148	-1012297.323	-878624.783	-733457.9964	-903459.1937	-955682.0468	-946881.7196	-823592.4703	-855969.2726	-1081114.583	-1140783.849	-1116308.831	-976617.625	-832125.3566	-1060775.205	-1119804.496	-1093958.128	-953902.9968	-791514.686	-1015650.031	-1069844.466	-1047224.873	-912239.8953	-825654.4972	-972583.6669	-1145506.509	-985700.2029	-825921.9682	-901683.0233	-1122301.08	-1179141.437	-1155070.709
403	-572445.3505	-774207.0232	-849271.4982	-853185.0581	-790188.5703	-653503.2615	-886378.8103	-950861.6161	-956831.436	-853603.9745	-612715.9898	-843329.8663	-905161.3114	-912273.4388	-812343.917	-592610.2188	-811774.2998	-867454.6085	-870720.3114	-774058.2284	-676568.4122	-836726.6459	-893361.2171	-877449.9502	-795006.0944	-716606.8474	-944347.8406	-1005440.248	-1008427.156	-900544.9828	-676312.0776	-901673.6463	-960104.7596	-964345.321	-859451.2	-652979.7478	-867305.3599	-919906.4547	-920646.9271	-818887.7524	-780691.4739	-899246.2686	-937450.8735	-901714.7763	-799823.6185	-779710.3707	-1002316.801	-1060018.888	-1060022.861
404	-591827.004	-837525.0773	-930376.5212	-964026.6487	-893994.1305	-683482.7969	-963503.2309	-1067326.12	-1116097.551	-1052084.292	-620105.9919	-881703.6659	-986992.684	-1040753.929	-981795.594	-567459.4582	-792711.197	-886304.1484	-929476.6061	-867482.75	-699356.587	-887923.8834	-958307.5808	-969203.1435	-885891.2356	-742716.1104	-1012386.892	-1108027.375	-1148793.727	-1075198.99	-683371.936	-935067.7204	-1032015.457	-1077696.841	-1008128.481	-631710.4957	-848823.2858	-935070.5115	-971212.9778	-898506.8339	-806886.1735	-938322.6826	-986238.5712	-974379.5553	-877788.3543	-801949.3615	-1061270.503	-1148728.616	-1181489.916
405	-610177.9089	-874731.9061	-975397.0967	-1015233.479	-949701.555	-720706.9575	-1021898.86	-1143934.942	-1211025.601	-1165709.137	-649078.9057	-925265.0097	-1050316.137	-1123604.796	-1084512.188	-577663.1484	-806936.7782	-917320.0614	-976374.3174	-932131.6737	-717109.954	-918276.8875	-994410.9725	-1010233.836	-934056.9514	-775454.5015	-1063977.605	-1175645.902	-1232535.922	-1175466.313	-709291.4309	-973488.0618	-1087952.471	-1150912.26	-1098710.409	-641052.9827	-860666.4909	-961758.2194	-1011860.868	-954395.1135	-824042.0036	-961821.8599	-1013424.777	-1005234.103	-918412.3657	-830201.9831	-1106056.305	-1207356.844	-1254046.261
406	-651595.8323	-766513.0586	-858293.0763	-856420.2122	-764053.165	-899234.8721	-1065854.03	-1079671.258	-1031419.907	-869680.8001	-901947.3758	-1080554.648	-1090742.981	-1042798.003	-878576.8549	-865655.7314	-1056068.743	-1073131.157	-1035506.6	-878648.0352	-731100.7868	-818029.8457	-895476.8844	-881123.406	-761755.4274	-934260.5073	-1102231.698	-1118876.123	-1074084.517	-913905.3247	-932861.9199	-1112322.696	-1125351.053	-1080998.152	-918871.7355	-893083.4818	-1083541.804	-1102856.028	-1068185.926	-913363.3892	-810605.7374	-869546.6338	-932660.6359	-905826.5392	-759457.6898	-969286.0641	-1138609.303	-1158080.988	-1116749.111
407	-569773.8046	-789168.7884	-874687.4625	-903797.7069	-806872.0544	-632345.0764	-886129.0124	-969975.4955	-1000824.933	-916730.4471	-578282.9451	-824055.489	-907107.6859	-940589.4537	-859314.2824	-549114.8654	-774006.8376	-848640.9982	-874513.1283	-790362.3815	-677613.6675	-849901.1386	-916290.7343	-922783.9378	-808736.6568	-697781.9595	-944195.2026	-1022467.832	-1047692.992	-956423.0768	-645824.9191	-884314.8518	-961693.9662	-989565.432	-900648.1645	-614722.5432	-833266.031	-902793.1028	-923689.5356	-831927.4267	-785453.5264	-910633.4887	-957893.9477	-941770.1143	-810601.2632	-763218.78	-1002261.33	-1074960.169	-1094561.034
408	-639735.324	-832715.8429	-766190.7129	-906570.9124	-819808.6172	-806781.6746	-1036225.458	-1098498.518	-1073850.456	-935727.5848	-783980.0568	-1017284.886	-1078954.528	-1052777.527	-914203.2762	-746386.9094	-975213.2062	-1031901.374	-1009017.851	-875573.8489	-732177.3139	-901879.7602	-954104.4719	-945364.7227	-822326.6397	-852889.0296	-1077826.237	-1137291.71	-1113026.196	-973538.735	-828843.6786	-1057263.107	-1116049.783	-1090450.95	-950624.5606	-788816.8991	-1012740.19	-1066727.863	-1044322.117	-909543.8905	-824619.2958	-971043.6774	-1142018.16	-984158.4626	-824844.67	-898996.3222	-1119426.953	-1176084.901	-1152201.92
409	-570813.9727	-773070.8389	-852103.2214	-812843.627	-792013.768	-643560.8732	-876930.1735	-946025.7239	-960005.9414	-848085.4546	-602511.1246	-834773.6627	-901965.8891	-919037.9221	-808611.0731	-584967.0509	-807273.2255	-869069.901	-883004.3257	-775813.6407	-675334.8356	-837309.6409	-905359.827	-907107.1714	-807995.1685	-707954.5253	-936231.2609	-1001681.357	-1012161.87	-896298.4976	-667266.0576	-894264.5996	-957736.9299	-971313.1512	-856763.0408	-646140.364	-863508.649	-921828.2389	-932553.1059	-821109.6284	-779855.7021	-901548.4464	-958616.3736	-1001370.653	-823976.5691	-772348.1114	-995532.2788	-1057336.99	-1064317.792
410	-579364.6854	-783880.2692	-860162.0902	-862200.8001	-803039.0924	-669231.7065	-905595.9243	-973300.6608	-981925.0144	-882217.2733	-627849.1968	-861139.3205	-926326.7374	-936082.6649	-840018.8908	-602972.415	-823319.3515	-881671.4298	-886730.7369	-793875.0723	-682530.2907	-844700.8774	-902111.8124	-884141.1421	-805911.4825	-730486.6042	-961343.3242	-1025284.057	-1030587.84	-925884.0141	-689769.055	-917463.0433	-978869.3841	-985419.448	-883993.7807	-662148.4439	-877390.4948	-932330.6666	-934589.0199	-836226.8898	-785695.8959	-905521.4856	-944061.472	-906081.4174	-808783.8725	-791741.4394	-1017090.653	-1077267.463	-1079250.649
411	-620733.6631	-844267.6611	-927326.5535	-961375.0064	-879737.2742	-779319.3711	-1034352.288	-1116331.038	-1138758.104	-1059879.963	-735911.3772	-980811.4064	-1062105.828	-1088644.707	-1012767.527	-679013.7842	-899845.408	-972255.8484	-992913.1746	-917168.8461	-716881.9672	-890831.7473	-954741.1193	-964950.8961	-867782.8604	-827250.5692	-1074619.54	-1150944.039	-1168087.091	-1082056.046	-785777.174	-1023184.366	-1098739.667	-1119978.658	-1036299.418	-729670.9356	-944107.8603	-1011448.447	-1027485.347	-943806.2071	-813030.267	-937395.8335	-982155.614	-968526.7403	-855828.4381	-875181.7049	-1114886.73	-1185557.057	-1197416.078
412	-613652.2512	-834301.085	-925860.2839	-823842.0785	-877266.4484	-733625.9796	-990137.6816	-1085481.168	-1126024.337	-1026672.967	-688418.6374	-939923.6134	-1035107.987	-1080959.904	-983224.0831	-643021.8642	-876663.282	-962913.0931	-1000959.958	-906039.9037	-712447.1981	-889567.5578	-976027.0185	-985164.7039	-893760.3127	-787576.0149	-1036632.355	-1125614.93	-1159868.467	-1055201.16	-743691.4532	-987694.9844	-1076322.177	-1115784.071	-1012342.155	-697418.754	-924282.6057	-1004436.988	-1036688.458	-935858.1228	-811242.1527	-944834.0383	-1026193.698	-1146487.267	-910254.1768	-841525.98	-1083126.95	-1165748.693	-1193712.581
413	-643538.4742	-836750.0333	-765360.3913	-910289.5597	-823432.8431	-815438.234	-1045452.133	-1108286.328	-1083061.967	-944380.6042	-793166.9043	-1027101.085	-1089432.385	-1062580.608	-923381.4643	-753994.1072	-983404.153	-1040660.078	-1017190.188	-883176.6782	-735368.7333	-905815.6574	-958035.7377	-949145.0301	-825481.0486	-860564.8956	-1086020.69	-1145994.009	-1121206.417	-981211.2294	-837021.5143	-1066015.141	-1125406.406	-1099190.725	-958794.3176	-795539.6968	-1019991.419	-1074494.338	-1051555.691	-916262.2472	-827198.9842	-974881.2815	-1150711.014	-988000.4298	-827529.2622	-905691.4947	-1126589.184	-1183701.69	-1159350.85
414	-604268.2963	-790392.5029	-864005.888	-875934.5742	-789377.3548	-760274.6928	-972851.8444	-1015889.729	-1010012.458	-888991.4058	-736995.9839	-952339.0452	-992462.3745	-987532.0721	-867356.2185	-706827.5515	-918524.7451	-956346.6989	-952228.881	-835959.718	-696968.0087	-846155.4197	-902264.581	-895441.5292	-788291.2538	-810611.9444	-1020086.944	-1061887.928	-1054853.554	-931048.8364	-786286.5955	-998253.3275	-1037162.463	-1031160.738	-908195.1459	-753517.5913	-961838.2958	-998515.83	-993333.2431	-874202.9338	-789667.7242	-901918.3364	-940523.2175	-914948.4216	-787205.1528	-860949.1217	-1067321.982	-1107886.138	-1099694.649
415	-576928.4643	-766093.4839	-779903.0023	-845159.5688	-759956.5898	-663823.5224	-883852.1753	-936858.3972	-921727.5941	-792827.8939	-632264.5001	-855175.944	-905918.6763	-890885.2316	-762630.7231	-620758.3671	-839944.3818	-887256.3517	-874056.3534	-750017.4496	-679472.8391	-836880.6568	-889181.8537	-882935.098	-770233.3721	-726126.4718	-942499.5077	-993578.182	-977934.4993	-846831.8568	-693791.3776	-912728.2471	-961530.483	-946118.5443	-815705.6737	-677793.7213	-892990.2618	-938468.9529	-924863.7496	-798594.0532	-782017.2107	-907667.8297	-998460.6395	-920710.5615	-780510.1576	-788429.3587	-1001146.778	-1050297.967	-1034141.398
416	-648152.5242	-768852.3327	-809405.9666	-803063.2055	-710277.0063	-897755.4287	-1045062.739	-1033531.745	-965963.8533	-781729.8091	-918936.2366	-1092384.771	-1073654.558	-1003152.925	-813966.4782	-897450.6995	-1103395.145	-1093144.198	-1034304.259	-853578.8035	-718526.3666	-822378.3297	-854542.3351	-834066.1734	-710343.5884	-931546.2087	-1083149.717	-1077297.895	-1015649.591	-835676.671	-946305.9843	-1123034.385	-1110179.473	-1045829.246	-861934.308	-919705.2191	-1127050.263	-1121734.387	-1068024.992	-892618.4584	-788900.2125	-875904.3249	-899678.6411	-865069.0788	-710410.1713	-965336.9262	-1121236.604	-1121064.045	-1065335.335
417	-593706.0804	-779898.2588	-852717.4156	-864996.8896	-778803.8481	-731068.4345	-943805.4631	-987398.2846	-981099.6227	-859834.5541	-705642.611	-921062.9482	-961669.3708	-956356.0936	-836018.403	-680964.0079	-892803.6399	-931097.1316	-926600.822	-810122.7222	-688926.8337	-838095.1089	-893637.375	-887156.7609	-780227.7797	-784871.2261	-994509.7672	-1036851.627	-1029401.339	-905354.347	-758487.5206	-970534.5686	-1009913.753	-1003535.606	-880410.6093	-730712.0733	-939176.3088	-976310.2759	-970758.2653	-851422.2862	-784147.5896	-896291.959	-934557.277	-909316.5697	-781651.7114	-838673.9452	-1045214.009	-1086304.979	-1077703.055
418	-541248.5587	-771870.2109	-815720.9865	-808566.0728	-716346.6916	-824534.2275	-970689.258	-962588.8203	-908358.913	-744031.0202	-827305.1865	-983536.398	-968660.8563	-913712.3129	-746339.754	-815564.4696	-988986.7979	-979683.8363	-933384.9575	-772415.4638	-737816.3377	-846664.7532	-867438.6418	-842569.2575	-721567.0292	-869784.7228	-1019527.254	-1015856.412	-965462.0606	-802865.1231	-868216.9869	-1027547.477	-1017371.134	-966467.8387	-801383.8364	-850658.898	-1026151.943	-1021090.977	-978294.952	-819581.9839	-934384.1167	-921459.2956	-919156.2334	-876572.3795	-726787.3662	-915035.1752	-1068365.188	-1069124.013	-1022565.208
419	-670141.4614	-685662.6665	-865541.1933	-859910.4595	-763349.0505	-894344.5375	-1080189.082	-1075594.237	-1016450.59	-852534.6491	-895460.1486	-1095039.765	-1082333.477	-1021563.746	-855110.7645	-865177.3007	-1074459.773	-1067400.773	-1015270.084	-855662.6085	-770636.1523	-892603.3512	-925882.9231	-889374.7592	-764433.9175	-931396.6025	-1117035.183	-1116488.777	-1061445.451	-899093.3908	-928531.1611	-1127271.839	-1118874.742	-1062498.847	-898105.635	-894145.0184	-1101918.685	-1098689.432	-1050488.921	-892897.135	-871130.8352	-1099544.036	-986224.5983	-918838.9964	-765518.7856	-968448.589	-1153881.237	-1157383.316	-1106440.311
420	-599755.0134	-748454.2901	-800822.996	-803234.2237	-714121.1802	-757070.9154	-932570.8208	-945796.6269	-903263.0699	-745209.9467	-753307.9845	-944781.0297	-952426.4519	-908716.8006	-748406.9226	-743592.1127	-952382.8417	-963892.7735	-927246.0826	-773328.7911	-686717.9258	-809785.4216	-850530.6296	-836821.959	-720766.4847	-807654.1474	-984315.9678	-1000241.734	-960635.3065	-803853.8885	-800004.478	-991936.7953	-1002407.455	-961797.6686	-803351.2875	-784844.6263	-993008.5724	-1006827.004	-972703.1331	-820637.1003	-773680.8402	-871116.5521	-900238.2006	-870409.6317	-727411.7897	-858237.317	-1036061.036	-1054686.842	-1018007.547
421	-652647.3339	-846412.2537	-763371.7021	-919196.0281	-832113.1643	-836171.4111	-1067550.784	-1131728.946	-1105124.299	-965105.3027	-815170.1651	-1050611.695	-1114527.722	-1086059.798	-945363.9854	-772213.9764	-1003022.149	-1061637.902	-1036763.613	-901386.0845	-743012.4472	-915242.4576	-967451.4452	-958199.1795	-833036.1193	-878949.2307	-1105647.084	-1166836.738	-1140798.724	-999587.4892	-856608.1082	-1086976.988	-1147816.293	-1120123.209	-978361.5626	-811641.3544	-1037358.715	-1093095.689	-1068880.702	-932353.2683	-833377.5516	-984072.6613	-1171531.117	-997202.2595	-833959.083	-921726.9877	-1143743.322	-1201944.531	-1176473.132
422	-594412.0149	-780599.6504	-853471.8901	-865727.9189	-779510.5373	-733020.4593	-945746.8024	-989302.5342	-983032.0364	-861783.2767	-707738.14	-923153.3124	-963727.447	-958439.7663	-838112.8923	-682692.6195	-894522.7316	-932784.7076	-928313.6948	-811849.5595	-689464.2724	-838633.8266	-894213.9816	-887710.4803	-780766.7088	-786591.6286	-996219.2393	-1038524.949	-1031102.459	-907071.6597	-760345.4951	-972387.1751	-1011734.943	-1005381.955	-882267.6121	-732236.2992	-940690.9417	-977794.4027	-972267.0829	-852944.8499	-784516.5324	-896668.0027	-934956.0157	-909692.9793	-782022.8803	-840162.7253	-1046691.614	-1087747.373	-1079172.882
423	-608371.5946	-863464.2341	-967655.4673	-1012925.567	-902098.0859	-703674.3625	-1001125.367	-1125358.84	-1199191.41	-1157019.189	-631603.2628	-909916.0334	-1036179.102	-1114200.268	-1076402.318	-563960.9517	-802177.9575	-913453.3805	-974672.1451	-926961.2033	-714511.0826	-912061.6039	-993718.1914	-1012227.266	-889083.5969	-760560.2962	-1045971.456	-1160015.25	-1223325.274	-1169188.3	-693382.686	-960142.208	-1075976.421	-1143403.271	-1092667.954	-628107.1358	-856735.2454	-958702.3729	-1010626.308	-950113.812	-820650.5621	-960658.9736	-1019780.861	-1011528.92	-876069.1164	-817446.1675	-1090817.482	-1194671.658	-1247459.104
424	-634259.4126	-820190.6152	-896059.1893	-906991.8235	-819400.531	-843205.0456	-1055328.231	-1096790.389	-1092109.645	-971781.47	-826023.0082	-1041146.647	-1079898.246	-1076055.39	-956339.0678	-780266.3594	-991559.103	-1028042.138	-1024999.037	-909323.144	-719800.7	-869042.4462	-926761.2909	-918965.8967	-811187.2626	-883701.9933	-1092712.623	-1132977.804	-1127124.405	-1004007.62	-865221.29	-1076959.967	-1114534.414	-1109601.525	-987088.5596	-818273.2211	-1026186.373	-1061567.879	-1057434.26	-938887.9445	-805341.9917	-917894.2772	-957463.3384	-930939.9075	-802973.9942	-924198.8616	-1130096.952	-1169165.237	-1162139.166
425	-613661.2122	-779565.5645	-835235.2819	-838468.9298	-750082.6722	-804737.3494	-984548.0318	-1009025.327	-976440.6417	-827950.1565	-799015.7499	-991743.9079	-1010894.697	-977996.4144	-827959.4491	-775709.4329	-979951.2411	-1000960.628	-973780.1388	-829548.3874	-699503.8471	-834745.7294	-877254.7893	-864511.2586	-750824.3514	-849865.8364	-1029852.582	-1055919.743	-1025168.405	-876893.465	-840881.5875	-1033190.796	-1054031.678	-1023115.575	-873722.6911	-813642.8827	-1016686.859	-1039016.181	-1013392.981	-869773.7116	-785346.4878	-889925.8915	-919274.2327	-890553.5235	-751566.0319	-894994.2609	-1075157.069	-1102814.16	-1073896.168
426	-600237.1616	-813060.0384	-893014.0369	-889397.1798	-841803.2538	-716677.2481	-963565.1883	-1040989.02	-1057620.89	-968530.5391	-673499.177	-914862.3172	-990173.1696	-1007904.236	-923501.6587	-634230.4327	-858145.5045	-924557.0924	-935026.8849	-853653.4476	-700514.5576	-868755.4952	-928508.3653	-904325.4148	-838808.062	-772355.4971	-1012610.943	-1085143.775	-1097436.513	-1002320.309	-730362.6154	-965092.4494	-1035473.694	-1048990.473	-958027.5476	-689806.2161	-907812.7451	-969808.8448	-976645.9523	-888531.1551	-800791.9536	-924450.952	-964002.6312	-919253.5811	-835812.8702	-828033.6837	-1061656.623	-1129298.543	-1137252.111
427	-605319.6758	-820165.4048	-901013.5902	-896019.5846	-851242.4502	-728230.3881	-977680.8882	-1057471.35	-1076053.076	-989548.0934	-684615.0922	-927944.0374	-1005719.979	-1025393.017	-943829.9778	-641841.8592	-866625.7833	-934999.8874	-946787.1504	-868209.6718	-704893.7837	-874612.871	-934936.0098	-909240.3493	-846818.4836	-782550.7055	-1025094.771	-1099719.807	-1113714.377	-1020932.79	-740247.2762	-976690.361	-1049257.023	-1064470.219	-976055.0049	-696540.9715	-915220.6596	-978934.9002	-986886.9488	-901267.4098	-804467.8916	-929060.3371	-968858.3668	-922461.0448	-842394.517	-836870.9604	-1072508.578	-1141968.276	-1151375.651
428	-617926.0685	-803962.3823	-878602.7668	-890077.857	-803049.727	-798040.6719	-1010411.09	-1052731.398	-1047399.019	-926693.4983	-777538.3502	-992781.4876	-1032280.139	-1027845.053	-907878.4677	-740271.1386	-951784.1482	-988996.3667	-985367.9681	-869368.9767	-707365.8777	-856578.0326	-913420.2339	-906154.3833	-798717.9572	-843896.7088	-1053160.237	-1094261.826	-1087765.261	-964273.8232	-822232.976	-1034095.853	-1072397.18	-1066882.196	-944122.7274	-783006.9118	-991142.0195	-1027229.35	-1022524.457	-903660.0948	-796805.6904	-909193.6828	-948237.6457	-922230.8472	-794386.1874	-889752.6691	-1095909.322	-1135792.268	-1128131.503
429	-617135.2463	-699396.1886	-835760.1677	-837887.4039	-746170.7625	-766533.0946	-963221.1776	-978645.7275	-939195.6313	-791385.1412	-752580.258	-958510.051	-967665.0993	-927692.1551	-778876.7126	-736533.8902	-947126.7321	-958797.8733	-924421.8796	-781183.5494	-721105.7574	-853643.9745	-894365.4577	-870324.7485	-752897.3074	-817727.4479	-1013089.036	-1030463.499	-993076.5991	-845138.2145	-801167.9255	-1005276.627	-1016552.09	-978857.5486	-830216.0343	-780321.6579	-988679.806	-1002200.88	-969829.632	-826712.6465	-825076.2637	-1007891.76	-952970.6901	-902762.0306	-759623.8528	-868921.7289	-1062956.841	-1082281.271	-1046957.567
430	-573221.763	-776512.3777	-856248.8489	-813461.8116	-796805.5241	-648623.119	-883293.1731	-953864.0286	-969337.2569	-858123.2364	-607339.6866	-840683.775	-909449.3425	-928138.9925	-818425.462	-588230.1097	-811173.3988	-874344.4999	-889634.2008	-783133.2052	-677420.7922	-840246.8763	-909331.7836	-911494.5133	-812815.7285	-712429.7718	-941874.4566	-1008647.231	-1020463.943	-905229.8626	-671561.6628	-899515.996	-964402.1934	-979433.3582	-865507.6008	-649022.5436	-866924.5414	-926471.3888	-938406.1912	-827559.2414	-781619.8251	-903981.3787	-962414.6595	-1009527.153	-828825.9328	-776236.3584	-1000455.67	-1063430.434	-1071590.622
431	-595351.5432	-808033.6611	-886774.1182	-915010.2735	-832636.5693	-716909.9971	-959788.2469	-1031412.905	-1044709.597	-952982.9176	-675235.3082	-911607.2716	-981753.0079	-998306.9979	-909108.1845	-636865.6803	-855292.3878	-918464.4214	-931111.0561	-843061.526	-695391.6926	-862033.6195	-922549.893	-928424.7342	-828756.2572	-772289.4766	-1008850.324	-1076090.382	-1085325.442	-987732.1259	-731846.7161	-961940.429	-1027650.257	-1040158.654	-944634.2092	-692307.0758	-905227.4044	-964452.7693	-973540.6163	-879052.3395	-795431.8389	-916033.578	-958325.5991	-941839.1444	-824875.939	-827668.8937	-1057912.339	-1120767.871	-1125941.288
432	-559820.4425	-772631.1306	-851854.3001	-874714.728	-796832.5404	-618558.621	-861653.0329	-933709.5501	-950529.6679	-853906.5681	-569573.1518	-805726.5505	-876547.6676	-896250.3542	-802643.3947	-549662.786	-767899.781	-832208.0301	-847680.3961	-754725.9266	-668392.2159	-834983.9715	-895338.1836	-897639.8404	-801883.4471	-685615.748	-922405.4251	-990091.1446	-1002735.549	-900318.6661	-638164.6883	-868057.2367	-934453.4292	-949998.8446	-850140.8489	-615415.8831	-828167.0689	-888523.3922	-900317.3351	-801029.8071	-776963.9908	-897336.8094	-938822.0017	-920564.8812	-806934.3599	-752672.8125	-983157.7608	-1046472.733	-1054941.436
433	-584769.5213	-818033.4839	-910806.6771	-946195.2243	-843868.5402	-660057.3824	-930806.5121	-1030343.838	-1077892.752	-1010085.582	-598998.5451	-857413.3678	-957253.5205	-1008039.393	-943655.6574	-554882.7527	-784951.6646	-873821.4068	-913426.1396	-843432.7058	-691948.7676	-874051.2447	-946372.2548	-957533.7722	-839952.4324	-722172.1163	-983736.5301	-1075906.698	-1115928.296	-1039084.986	-664301.6971	-913774.7134	-1006094.107	-1049333.327	-975250.2173	-619922.6222	-842384.1098	-924514.5426	-957465.5422	-877844.2927	-799128.0081	-930069.0056	-981937.7757	-968872.2692	-836036.3303	-784286.7878	-1036666.486	-1121469.557	-1153963.817
434	-652214.5603	-770564.3544	-810126.3411	-803048.8518	-709954.3622	-909563.1759	-1054504.262	-1040895.413	-971226.3728	-784794.9461	-932837.5288	-1104773.253	-1083829.316	-1011079.014	-819468.9365	-910364.1556	-1116069.711	-1103992.359	-1043289.725	-860314.2418	-721196.0708	-823435.2611	-854879.0402	-833834.8784	-709468.7876	-941944.554	-1091444.901	-1083765.271	-1020266.977	-838347.5789	-958585.1696	-1134037.495	-1119224.851	-1052882.073	-866851.2209	-931024.1607	-1138300.473	-1131378.642	-1076025.42	-898659.9029	-790177.5848	-876306.166	-899631.6768	-864620.8425	-708983.2139	-974325.8695	-1128385.448	-1126635.129	-1069307.589
435	-649213.3795	-765585.9116	-856890.1064	-855344.7437	-763144.6939	-892482.6616	-1060056.704	-1074542.055	-1027094.586	-866149.5966	-894378.3849	-1073742.131	-1084603.426	-1037480.511	-874132.1116	-858949.8174	-1049814.261	-1067361.737	-1030366.745	-874304.4055	-729325.5443	-817516.4479	-894453.8483	-880299.386	-761209.3173	-928285.592	-1097121.7	-1114349.816	-1070269.065	-910796.0096	-926144.4042	-1106276.159	-1119893.385	-1076268.716	-914916.1756	-887180.2625	-1078020.669	-1097748.948	-1063628.004	-909502.6742	-809437.7052	-869446.9851	-932017.5336	-905253.9677	-759273.9406	-964088.4443	-1134186.632	-1154157.578	-1113443.528
436	-592962.1195	-804727.958	-890236.9258	-818530.0207	-836090.91	-690126.1244	-935460.4553	-1018126.652	-1045840.385	-940418.3535	-646926.8265	-889138.0449	-970802.7058	-1002754.448	-898889.0842	-614982.4151	-843149.1106	-917588.4893	-943989.4718	-843142.9195	-694522.5827	-864327.9072	-941896.0135	-947464.2948	-852337.2633	-749120.2421	-988140.4002	-1065757.204	-1088528.79	-978453.9817	-706779.3374	-942569.7592	-1019047.598	-1046007.169	-937200.1918	-672652.1976	-894929.8584	-964538.4219	-986392.9226	-880436.6273	-796083.0516	-923927.8622	-993555.0444	-1076398.506	-868583.6166	-808114.2917	-1040820.271	-1113387.756	-1131217.184
437	-599378.0581	-813781.6735	-893207.1894	-922365.3836	-840108.431	-726810.3629	-971616.779	-1044883.968	-1059629.064	-969940.6241	-684860.7096	-922585.5303	-994499.848	-1012637.8	-925552.2753	-643551.8818	-862360.0953	-926997.6717	-940915.0894	-854817.6057	-698800.8211	-866602.0358	-927656.5764	-934219.0939	-834947.2766	-781008.2778	-1019283.682	-1087964.858	-1098454.409	-1002695.284	-740402.0216	-971655.9147	-1038927.588	-1052820.971	-959175.6	-698234.3245	-911395.2396	-971907.9698	-982098.1861	-889324.6261	-798223.581	-919422.3981	-962105.8944	-946072.7546	-829786.1158	-835206.1302	-1066950.522	-1131045.761	-1137279.754
438	-543905.1989	-791335.9126	-825836.9699	-810512.5076	-715211.5534	-922903.0386	-1043306.104	-1014287.353	-942670.7833	-762433.3008	-941043.8172	-1074521.63	-1037436.181	-964368.2211	-779393.8536	-922454.685	-1080910.576	-1052431.749	-990992.9098	-813493.3523	-773736.3555	-867239.1601	-875961.9159	-843339.9332	-716492.0523	-957449.927	-1083984.106	-1061592.926	-995703.3401	-818915.2591	-969771.291	-1108811.89	-1078715.267	-1011628.586	-830874.583	-945392.002	-1107994.586	-1085851.489	-1029635.651	-856337.3428	-1003567.512	-943142.4077	-926086.7977	-876167.2962	-717772.5503	-991996.7798	-1124662.045	-1108898.512	-1048735.897
439	-642979.1012	-827620.8222	-856036.7974	-911970.91	-826074.666	-844438.4675	-1061807.73	-1104668.219	-1099231.112	-972972.9172	-825102.4834	-1044579.704	-1082035.011	-1079845.855	-955222.4796	-779135.6705	-992660.0834	-1023852.792	-1025907.511	-907926.6612	-731179.2833	-876109.8288	-888807.9642	-924790.8463	-821611.7431	-885540.1842	-1099265.467	-1140752.171	-1134277.552	-1005805.861	-864898.3069	-1080493.388	-1116749.147	-1113469.444	-986582.5978	-817418.9142	-1027136.213	-1057365.783	-1058199.943	-937779.3846	-819379.4738	-924598.8311	-921579.0705	-937610.7159	-817148.8287	-926641.8384	-1136723.141	-1176836.14	-1169323.975
440	-628637.9425	-696415.9243	-842222.8455	-842666.5514	-749898.5636	-794269.0156	-988603.9797	-999684.1896	-955960.4638	-804654.9852	-783586.1308	-988137.894	-992548.8888	-948062.9056	-795420.0016	-764450.3536	-974758.8367	-982365.4144	-944136.5355	-797345.9935	-731854.1778	-862098.4146	-901204.9543	-874458.7257	-755400.8274	-842394.3996	-1035646.031	-1049131.548	-1007913.088	-856846.8414	-828806.5825	-1031750.388	-1038756.776	-997008.2587	-844948.5227	-805022.0732	-1013253.385	-1023139.528	-987333.2265	-841075.1143	-835070.4076	-1027780.905	-960187.0061	-906250.8376	-760903.0919	-890519.71	-1082688.031	-1098578.907	-1059865.712
441	-546798.5376	-812535.9487	-836854.2564	-812632.3639	-713975.2778	-1030036.21	-1122392.889	-1070592.067	-980039.7362	-782475.1683	-1064916.212	-1173613.368	-1112339.177	-1019537.416	-815392.9724	-1038868.492	-1181024.481	-1131661.279	-1053733.554	-858231.155	-812856.7371	-889646.6837	-885244.5876	-844179.2739	-710964.9104	-1052925.833	-1154183.865	-1111404.423	-1028639.025	-836395.4131	-1080373.773	-1197316.714	-1145524.974	-1060813.018	-862992.8649	-1048565.536	-1197129.158	-1156381.964	-1085550.65	-896367.4917	-1078914.937	-966757.4187	-933634.8541	-875726.1212	-707954.5419	-1075815.428	-1185974.779	-1152216.797	-1077238.314
442	-587693.9925	-777513.0149	-777552.6214	-855685.896	-770215.6394	-688327.5341	-909970.0052	-964564.6268	-947802.5001	-817321.8848	-658269.5912	-882962.5328	-935578.2127	-918634.6858	-788611.3024	-642291.9643	-863130.3897	-912049.5044	-897189.6834	-771538.6809	-688506.7489	-848021.9507	-900310.0375	-893635.9656	-779162.5169	-747854.4471	-965695.4409	-1018211.67	-1001090.146	-868550.2882	-716940.2719	-937502.5174	-988016.155	-970858.1124	-838831.6999	-696823.8585	-913516.224	-960453.4133	-945339.7363	-817611.6193	-789319.5014	-918530.8864	-1023067.387	-931585.9686	-788109.3983	-807381.2976	-1021420.814	-1071858.714	-1054377.784
443	-561681.6834	-771878.3003	-857332.5919	-891518.1078	-759802.8475	-613234.3593	-858028.4562	-935548.6514	-964423.6158	-884926.8591	-562585.6189	-803104.4752	-879266.9845	-911210.7217	-837345.2093	-541857.445	-767158.514	-836382.9423	-863165.079	-788896.9974	-669534.3741	-836385.8264	-903638.0259	-921959.7429	-835921.3266	-680967.5322	-919438.7849	-992267.3482	-1016084.965	-929457.1555	-631726.4555	-865877.5873	-937250.9535	-964094.0999	-882618.6053	-608008.0451	-827570.4067	-892400.4586	-914496.0077	-832593.5846	-777387.0648	-900893.3525	-949943.4074	-952401.3154	-912039.8058	-748700.6394	-980849.051	-1048986.052	-1067746.314
444	-607379.0383	-869057.1397	-968530.5817	-1007423.44	-941205.0873	-715029.5477	-1012992.389	-1132250.604	-1196547.224	-1148379.134	-644659.9718	-918621.0559	-1040658.077	-1110968.425	-1068845.906	-576106.8868	-804767.0998	-912589.5303	-969221.5026	-922271.4532	-714402.2196	-913647.4629	-988904.5018	-1003975.856	-926710.7412	-770461.259	-1056109.016	-1165332.759	-1219763.606	-1160173.592	-705338.2029	-967628.2111	-1079420.986	-1139745.482	-1084894.9	-639628.0714	-858860.1714	-957687.8239	-1005661.273	-945871.0619	-821425.4052	-958237.7775	-1009278.351	-1000528.183	-912216.4124	-825892.9078	-1099225.598	-1198414.897	-1242980.005
445	-663630.1362	-775375.6639	-812150.8162	-803008.5135	-709047.6325	-942746.5922	-1081037.859	-1061589.595	-986015.678	-793408.9276	-971904.4532	-1139588.716	-1112423.527	-1033353.77	-834932.5435	-946654.9556	-1151689.155	-1134479.039	-1068541.659	-879242.9035	-728698.7639	-826405.5646	-855825.2858	-833184.8682	-707010.3271	-971167.1155	-1114756.929	-1101940.596	-1033243.259	-845853.6548	-993093.4724	-1164959.633	-1144645.16	-1072702.697	-880669.2646	-962833.8822	-1169917.039	-1158481.977	-1098509.096	-915638.2278	-793767.3955	-877435.4634	-899499.6929	-863361.1602	-704973.0228	-999587.5763	-1148475.906	-1142291.596	-1080470.848
446	-652781.6221	-690160.4737	-855787.7367	-852697.7826	-757723.0627	-852485.5573	-1041881.423	-1043843.045	-991149.1482	-832507.8347	-848666.1654	-1050325.501	-1044778.926	-990820.2617	-830143.6755	-823045.8464	-1032757.472	-1031832.701	-985516.7764	-831270.2897	-754414.664	-879843.932	-915560.7725	-883135.7715	-760655.6116	-894169.3028	-1082992.224	-1088315.005	-1039054.26	-881422.7613	-886818.9714	-1087317.708	-1085363.487	-1035105.842	-875871.4016	-856867.2153	-1064832.303	-1067088.878	-1024072.542	-871221.3357	-856047.699	-1069527.39	-975333.7527	-913573.6979	-763588.1613	-935852.9718	-1124102.976	-1132786.966	-1086959.371
447	-621470.8298	-845476.4522	-939321.9685	-825849.4481	-892826.2423	-750064.1078	-1010799.618	-1110933.716	-1156324.991	-1059267.659	-704097.9472	-959114.9344	-1059408.262	-1110512.906	-1015093.374	-653617.671	-889327.9275	-980040.7742	-1022488.494	-929807.9987	-719220.7178	-899105.3507	-988924.7589	-999411.2837	-909413.6383	-802108.0385	-1054956.944	-1148234.522	-1186826.964	-1084203.095	-757640.1455	-1004747.322	-1097965.625	-1142152.013	-1040737.497	-706777.7698	-935374.6938	-1019514.228	-1055694.6	-956801.3109	-816970.6142	-952734.2577	-1038527.495	-1172973.057	-926001.0341	-854151.8982	-1099114.19	-1185535.329	-1217328.921
448	-619508.5749	-783379.0326	-820405.8627	-807598.1534	-712391.3283	-931117.2763	-1068817.797	-1044741.844	-968812.51	-780267.5065	-950568.4872	-1113484.139	-1082960.93	-1004866.313	-810732.2486	-921224.5034	-1119511.074	-1100957.405	-1036336.987	-850569.5158	-692026.4699	-836796.4632	-866627.1094	-839076.7041	-711920.7328	-962191.6302	-1105162.066	-1087840.947	-1018457.272	-834459.1012	-975329.6009	-1142421.313	-1118854.421	-1047545.028	-858937.4515	-940849.1543	-1141354.306	-1128772.406	-1069931.772	-889700.0928	-764544.3622	-890213.8973	-912848.2944	-870555.1923	-711450.1386	-993265.9216	-1141506.288	-1130940.036	-1068102.049
449	-564427.6265	-778878.1297	-861810.4685	-888682.4121	-793682.3013	-622465.2604	-870200.8728	-948453.3556	-973349.2015	-883448.0647	-570897.5504	-812162.949	-889230.01	-916542.6279	-829245.4287	-547058.5347	-770104.8571	-839663.8382	-860640.1075	-771442.0851	-672503.0083	-841291.2954	-905566.2608	-910395.1466	-797607.8058	-689086.535	-930098.1785	-1003416.146	-1023366.172	-926952.9756	-639237.695	-873812.0082	-945864.7086	-968257.3602	-874051.5124	-612868.6439	-830015.3112	-895049.1124	-911647.9273	-815557.436	-780578.3866	-903704.4611	-949321.9941	-932107.8254	-801533.3139	-755707.7471	-989995.4218	-1058378.937	-1073383.129
450	-616266.6168	-801383.3585	-839613.9114	-885304.3227	-799838.6385	-776196.6197	-992648.4924	-1036456.2	-1030224.752	-904856.3133	-752395.4426	-970982.4712	-1009880.116	-1006393.677	-882599.8132	-719250.5557	-932557.8431	-966147.5951	-966069.0227	-848168.6234	-709677.7107	-855623.2764	-878067.1365	-904087.5114	-800292.7822	-825211.1415	-1038158.162	-1080602.83	-1073313.398	-945594.1729	-800312.3136	-1015146.463	-1052819.718	-1048258.104	-922075.3922	-764579.362	-974187.1458	-1006744.611	-1005498.533	-885060.1714	-803088.8109	-909863.1911	-916520.3007	-922870.6345	-800746.9323	-874225.6007	-1083667.769	-1124749.473	-1116402.031
451	-596598.8815	-847200.1549	-942083.4464	-977342.2167	-908480.0104	-693162.3814	-978688.1383	-1087247.095	-1140782.166	-1081630.728	-627639.9635	-893031.1398	-1003458.998	-1062298.054	-1008505.503	-570112.7747	-796410.346	-894369.3712	-941671.6523	-884293.7327	-703973.0837	-895816.7267	-967695.7261	-979872.5594	-898416.0073	-751229.2379	-1025802.283	-1125610.558	-1170569.628	-1101272.003	-690111.9118	-945058.3538	-1046561.038	-1096735.412	-1031682.953	-634139.8693	-851902.9336	-942010.2495	-981782.8518	-913039.7425	-811347.2897	-944433.2911	-993307.9361	-982402.8175	-888352.019	-809296.0319	-1072916.379	-1163974.007	-1200357.105
452	-604865.3822	-748327.5996	-830774.6227	-835325.5123	-746234.0248	-766794.1224	-952142.8046	-979064.8695	-946581.2091	-800418.2619	-753485.9445	-946931.0253	-970319.1355	-938498.4262	-791395.7564	-734123.0609	-933390.6571	-959967.2696	-934691.2875	-793450.22	-696280.4193	-807959.8401	-875410.6163	-864960.7252	-751043.7902	-817065.9586	-1002002.002	-1030095.203	-999246.6036	-852917.8852	-801101.6892	-993723.3265	-1018302.017	-988232.9575	-841285.6895	-777295.2078	-975247.9104	-1002683.564	-978784.8965	-837637.6702	-787695.4541	-867592.0812	-920046.5509	-894595.8768	-755853.5556	-867337.7228	-1051861.137	-1081125.536	-1051911.989
453	-623816.1137	-697665.2248	-839513.7479	-840663.1749	-748335.9022	-782642.3621	-977963.7329	-990865.0518	-948932.7938	-799092.3836	-770588.7423	-975718.1634	-982117.8236	-939523.6666	-788485.2007	-752748.0182	-963175.7021	-972486.109	-935872.3255	-790570.8394	-727348.5348	-858554.3879	-898337.8976	-872725.7989	-754351.3739	-832054.2309	-1026190.337	-1041306.067	-1001693.763	-851938.6882	-817220.7012	-1020652.821	-1029448.767	-989399.6411	-838772.7934	-794667.8769	-1002952.357	-1014362.231	-979995.8741	-835054.4944	-830880.9506	-1019443.551	-957161.9901	-904788.3604	-760366.8462	-881466.0267	-1074416.89	-1091747.082	-1054454.732
454	-645494.9307	-838825.344	-764933.2485	-912202.5454	-825297.2555	-819891.4324	-1050198.616	-1113321.477	-1087800.649	-948831.9815	-797892.8991	-1032150.837	-1094822.515	-1067623.612	-928103.0045	-757907.482	-987617.8261	-1045165.823	-1021394.288	-887087.8057	-737010.4968	-907840.4032	-960058.1009	-951089.7356	-827103.7728	-864513.5954	-1090236.167	-1150470.738	-1125414.572	-985158.1947	-841228.4426	-1070517.455	-1130219.738	-1103686.731	-962997.09	-798998.1092	-1023721.673	-1078489.65	-1055276.863	-919718.375	-828526.0546	-976855.4622	-1155182.883	-989976.855	-828910.2984	-909135.6959	-1130273.655	-1187619.999	-1163028.478
455	-609045.6065	-800161.7335	-772891.0366	-876563.0948	-790562.7383	-736927.1184	-961770.3265	-1019515.272	-999517.689	-865901.5949	-709846.314	-938072.5568	-994402.913	-973671.0595	-840139.4102	-685000.2313	-909115.9354	-961222.5515	-943070.7512	-814222.4225	-706423.9893	-870118.8326	-922380.9177	-914859.3359	-796871.9732	-790948.2303	-1011700.672	-1067068.049	-1047015.476	-911625.1427	-762852.209	-986638.1143	-1040546.029	-1019924.883	-884698.282	-734566.9337	-954226.0166	-1004055.892	-985950.4107	-855329.7619	-803802.3665	-940075.9316	-1071870.731	-953155.5089	-803181.2137	-844969.2797	-1061630.954	-1114620.827	-1094513.252
456	-612574.0258	-751327.4685	-835314.0601	-838805.2888	-749173.4658	-788641.5161	-970900.5806	-995660.8748	-960576.18	-811843.7933	-777976.106	-968973.5455	-990184.2236	-955703.659	-805777.1291	-755820.6581	-953627.6042	-978634.7569	-951321.7568	-807504.4308	-702024.3786	-809620.9858	-878720.743	-867626.9171	-752810.7793	-836398.3428	-1018535.868	-1044740.482	-1011591.848	-862978.3584	-822836.8248	-1013287.45	-1035960.8	-1003535.481	-854084.2647	-796395.6133	-993112.0446	-1019207.989	-993532.4685	-850129.3663	-791474.7288	-867914.5037	-922127.3673	-896448.4842	-756448.0927	-884155.0963	-1066171.093	-1093820.088	-1062607.505
457	-590026.8941	-761751.6442	-809614.8484	-806168.5187	-714788.6759	-805072.6759	-969042.583	-969456.0509	-916794.7727	-751049.8027	-804820.477	-986050.0687	-981073.7186	-927411.867	-758492.0748	-787774.4058	-991026.748	-993056.5492	-948498.9596	-786294.9388	-675304.9431	-821559.244	-859181.3507	-839586.2918	-719858.3452	-850754.1582	-1017106.133	-1021477.534	-972709.7638	-808979.6952	-846214.0951	-1029014.03	-1028137.578	-978558.0315	-812293.3737	-823771.3354	-1027309.196	-1032814.359	-991689.5232	-832123.9331	-760582.9903	-881366.8461	-908747.791	-873004.0025	-724928.0153	-896435.5779	-1065169.631	-1073499.008	-1028624.764
458	-600932.2732	-849144.5618	-949736.854	-991892.3101	-883744.2615	-689926.3865	-978961.0188	-1095410.321	-1160958.34	-1110706.04	-621326.3277	-893367.309	-1011301.933	-1080738.594	-1034560.863	-561099.5234	-796748.268	-900961.4698	-955367.5392	-900633.2051	-707399.4907	-900080.8225	-978794.8566	-994987.9975	-873597.5622	-748460.4266	-1026355.144	-1133504.419	-1189473.983	-1128180.023	-684216.4225	-945527.2759	-1053949.67	-1113752.632	-1055658.143	-625527.3951	-852211.7991	-947926.4442	-993870.152	-927334.6189	-813866.7005	-951017.0831	-1007852.804	-998083.6376	-863450.8705	-806994.4042	-1073749.207	-1171598.518	-1217989.596
459	-592512.5889	-743520.4296	-823500.3557	-829749.3095	-741523.6881	-731784.5473	-922084.2185	-952470.4345	-924154.8278	-782109.3046	-714241.4399	-911608.768	-938486.126	-910927.7286	-768350.1815	-699353.5288	-900961.7585	-930053.3675	-908041.6254	-770928.909	-687075.9541	-805297.9206	-870106.2706	-860688.2593	-748212.2609	-786086.5859	-975507.1423	-1006626.728	-979463.8437	-836796.3793	-766272.0036	-962372.6014	-990004.5229	-963711.2747	-820776.4844	-746687.5718	-946621.3495	-976203.8328	-955152.5019	-817620.2265	-781639.3174	-867075.412	-916712.1259	-891627.1477	-754900.8336	-840388.5541	-1028930.004	-1060783.023	-1034772.852
460	-580913.059	-767187.5653	-839044.7478	-851749.0982	-765997.1513	-695693.6334	-908624.3062	-952889.2703	-946080.2171	-824519.5945	-667667.2115	-883181.1457	-924372.6939	-918595.5554	-798061.8468	-649637.9236	-861650.0779	-900514.6992	-895559.9581	-778828.7928	-679187.3127	-828332.4107	-883188.0497	-877122.1982	-770461.25	-753693.9086	-963530.5317	-1006527.503	-998573.4585	-874233.0222	-724817.109	-936961.436	-976909.9454	-970075.8756	-846757.8063	-703089.8886	-911727.9698	-949414.7711	-943415.3123	-823830.2248	-777461.5684	-889477.256	-927331.2929	-902495.2357	-774925.3488	-811694.1134	-1018436.695	-1060165.744	-1051066.7
461	-586372.1569	-759070.5752	-808277.1254	-805991.292	-715085.8664	-789447.3834	-956673.8111	-960123.1439	-910346.3222	-747427.7898	-786752.6241	-970252.5286	-968443.13	-917810.1199	-752016.0497	-771231.0806	-975099.0115	-979680.471	-937609.9976	-778327.0523	-673232.036	-819670.3411	-858258.3269	-839649.4636	-720842.3422	-836939.6584	-1006190.158	-1013250.702	-967038.6109	-805821.1055	-830208.1135	-1014955.34	-1016891.739	-970005.9634	-806511.0764	-809257.6222	-1013171.436	-1020918.788	-981990.115	-824986.4252	-760091.9134	-880270.1092	-908239.4665	-873307.5726	-726598.8189	-884431.8709	-1055706.452	-1066378.252	-1023730.908
462	-566140.1258	-782174.4557	-865935.255	-893524.1759	-797907.2715	-625629.9844	-875303.0088	-955347.3739	-982150.2871	-894109.1492	-573263.256	-815972.3931	-894956.6257	-924245.359	-838877.1488	-547717.2229	-771354.7479	-842539.4215	-865083.9435	-777502.6753	-674140.0657	-844049.2189	-909001.5473	-914363.5509	-801172.6234	-691871.8721	-934613.7677	-1009518.823	-1031158.592	-936392.902	-641347.7288	-877176.3017	-950935.1706	-975082.8077	-882571.0093	-613462.4889	-831056.5888	-897529.6841	-915505.1212	-820801.1067	-782140.0019	-905923.9822	-952067.7808	-935202.8706	-804437.979	-758113.6974	-993924.464	-1063690.273	-1080166.881
463	-596664.6139	-704699.9796	-824258.9423	-829382.2527	-739536.6269	-717173.2024	-918048.9846	-941204.8859	-909360.3023	-767769.6256	-697401.0358	-905783.2229	-923380.9677	-891439.5983	-749435.6509	-686852.6979	-897951.5953	-916856.1873	-889336.9334	-752420.2537	-701977.4627	-838598.1336	-882193.6313	-862967.7666	-748441.9486	-773829.2093	-972945.755	-997241.1342	-966673.0231	-824301.0998	-751981.1279	-958162.9228	-977035.7916	-946555.8597	-803997.5416	-736363.866	-944947.7368	-964937.6708	-938679.5744	-801152.6563	-807290.3078	-972496.2876	-940128.2615	-896553.218	-757347.2707	-830485.1463	-1027842.47	-1053277.383	-1023985.744
464	-638319.021	-761346.301	-850474.677	-850426.8963	-758990.484	-861606.4983	-1033546.991	-1051087.497	-1007315.979	-850002.2897	-859767.2897	-1042590.203	-1056528.787	-1013164.952	-853807.4167	-828285.3564	-1021214.086	-1040979.625	-1006863.48	-854442.0772	-721207.806	-815168.8083	-889775.7611	-876531.3496	-758712.093	-900963.8045	-1073754.96	-1093652.152	-1052821.96	-896577.8921	-895426.8917	-1078626.863	-1094936.84	-1054642.19	-896828.3935	-860186.3225	-1052773.909	-1074395.551	-1042785.773	-891848.5936	-804096.5874	-868991.3166	-929076.788	-902635.7421	-758433.702	-940321.0341	-1113962.868	-1136216.807	-1098327.927
465	-588354.4093	-743649.2907	-798801.1761	-803274.509	-715026.7207	-723931.02	-906072.0236	-925129.5857	-888493.1613	-736607.2626	-714292.2974	-910011.2287	-923869.7425	-886471.2583	-732963.5965	-707348.9091	-916810.1136	-933446.0769	-902027.2673	-754424.9547	-679225.0727	-806819.0137	-849585.6251	-837471.1167	-723221.7208	-778469.912	-961034.5133	-982090.2473	-947676.0433	-796357.657	-765541.4338	-961055.2127	-977020.4864	-942003.04	-789551.3665	-753076.624	-961433.4723	-979759.2161	-950248.9457	-803681.0429	-770095.7377	-869988.7358	-900370.0115	-871667.6619	-731416.7213	-833008.7416	-1015996.927	-1039050.909	-1006858.929
466	-569297.0673	-791845.1778	-875103.4587	-901158.542	-825600.5144	-637781.6186	-891809.2279	-973271.2536	-999551.6379	-912583.7842	-584535.1078	-828222.1445	-909248.6492	-939035.5237	-855687.4609	-554932.0925	-775246.0396	-848225.0151	-871898.9298	-788111.3968	-677560.265	-850658.6225	-913982.4028	-918828.576	-826756.7934	-702522.241	-949047.4808	-1025010.153	-1045981.011	-952097.8993	-651549.8226	-887897.9562	-963339.9663	-987808.1542	-896918.4295	-620240.4541	-834283.0403	-902305.2407	-921308.3873	-829891.1769	-785823.4647	-909472.063	-952861.2804	-936498.5351	-827913.0807	-767262.801	-1006285.679	-1076749.045	-1092410.392
467	-588692.7447	-706765.4325	-819780.0252	-826070.0955	-736953.0984	-697951.0016	-900457.5976	-926624.3156	-897741.5435	-758573.0459	-675912.6159	-885249.8376	-906135.4181	-877321.7812	-737970.4313	-667505.3732	-878801.3436	-900522.8551	-875673.8184	-741218.9763	-694528.3394	-832738.8384	-877453.5624	-860102.7404	-746706.9002	-756733.9377	-957312.7751	-984303.3634	-956390.6902	-816186.5115	-732826.3352	-939815.4539	-961646.9772	-933976.6273	-793787.2857	-719245.4026	-927917.1766	-950426.2758	-926548.8213	-791198.8407	-800363.9309	-958712.2444	-935127.0402	-894135.3229	-756460.7024	-815516.805	-1014167.897	-1041982.411	-1015039.837
468	-629264.3575	-853640.1243	-938700.9925	-927218.9808	-895712.282	-782659.4065	-1044182.609	-1135122.712	-1162890.576	-1088565.75	-736984.2617	-989574.4853	-1078963.923	-1107785.955	-1039600.517	-677700.7231	-906577.9739	-984197.8614	-1002191.975	-936786.7854	-725525.1427	-902208.0715	-965217.8533	-932395.5313	-884557.0882	-830582.2522	-1083908.436	-1168390.235	-1190402.461	-1108619.691	-786815.7749	-1031330.307	-1114192.882	-1137398.22	-1060985.751	-728269.6724	-950120.7401	-1021929.466	-1035134.212	-961270.3042	-821785.9278	-950776.0187	-991734.6517	-937572.0103	-873401.8944	-878505.0354	-1123634.183	-1201657.776	-1217914.309
469	-569150.8386	-791548.6963	-874744.7136	-900750.5019	-825156.6115	-637484.999	-891343.904	-972660.7984	-998795.2066	-911678.368	-584304.238	-827875.0272	-908744.0581	-938375.329	-854868.9668	-554850.7847	-775132.6835	-847977.8657	-871525.2268	-787596.2438	-677418.7978	-850416.7554	-913694.714	-918501.6242	-826372.9863	-702261.3661	-948636.3817	-1024471.337	-1045313.714	-951298.9222	-651343.2839	-887591.8049	-962894.2338	-987224.7394	-896196.6301	-620166.0088	-834188.6681	-902092.5805	-920984.4858	-829445.8328	-785686.759	-909284.8105	-952644.6479	-936252.6716	-827589.3695	-767037.6708	-1005928.805	-1076281.868	-1091832.229
470	-541304.1638	-772277.6399	-815932.7202	-808606.8129	-716322.9325	-826593.1466	-972209.1728	-963670.902	-909077.0813	-744416.1911	-829685.8053	-985440.7743	-970100.3657	-914772.5719	-747031.5964	-817801.7469	-990910.8185	-981206.4943	-934590.727	-773275.249	-738568.1655	-847095.3881	-867617.0391	-842585.3882	-721460.8069	-871619.6089	-1020876.376	-1016813.705	-966095.029	-803201.0622	-870342.5803	-1029248.391	-1018655.104	-967413.0807	-802001.0957	-852641.7195	-1027864.959	-1022446.454	-979369.544	-820351.2959	-935832.1673	-921913.1363	-919301.2943	-876563.9009	-726598.6806	-916646.0284	-1069543.516	-1069956.518	-1023112.977
471	-591703.4255	-762981.5265	-810228.4998	-806249.8175	-714652.3462	-812240.4399	-974716.4888	-973737.3196	-919752.8595	-752711.3226	-813108.7126	-993296.8475	-986867.7271	-931816.4602	-761462.8109	-795363.2974	-998333.2517	-999192.535	-953494.0348	-789950.0339	-676255.8443	-822425.7372	-859604.7678	-839557.3132	-719406.9579	-857091.2603	-1022113.6	-1025251.415	-975311.2822	-810428.6297	-853556.4919	-1035463.149	-1033296.362	-982481.1072	-814945.8772	-830429.1864	-1033794.586	-1038271.195	-996138.9163	-835398.1101	-760808.2612	-881869.9504	-908980.9739	-872864.7463	-724161.5704	-901942.0181	-1069510.659	-1076765.5	-1030869.715
472	-592221.823	-828752.7773	-933274.0204	-989680.8421	-804932.54	-665039.3977	-944568.6751	-1056431.465	-1127161.468	-1095759.221	-599737.405	-867751.9506	-980523.3459	-1056403.795	-1035361.365	-548983.4522	-788398.2882	-889147.8637	-953173.5698	-927272.4184	-698345.9889	-885031.0104	-968892.9955	-1012717.227	-948580.1692	-726568.0938	-996156.9702	-1099580.584	-1160864.711	-1117471.992	-664754.2709	-923043.7704	-1027136.953	-1093376.606	-1059332.526	-614241.3323	-845275.9428	-938119.5967	-993354.0597	-954473.1816	-804470.1548	-941309.2434	-1004511.929	-1035753.55	-1092227.798	-788096.7203	-1047745.203	-1142729.716	-1194567.954
473	-582135.2778	-789166.9091	-865658.7918	-890868.5305	-808111.6116	-684413.9387	-920963.3513	-987196.7177	-995739.2965	-897322.4872	-643641.7677	-875573.236	-939913.9418	-951268.8805	-855133.5998	-614919.5021	-832093.9891	-890455.6587	-898931.1908	-804474.4413	-684201.8796	-847038.6663	-905788.1807	-909405.8559	-808435.4192	-743671.6784	-974604.8232	-1037114.686	-1042232.118	-938618.4202	-703765.561	-930051.204	-990634.5747	-998597.0211	-896904.8735	-672852.0149	-884982.6642	-939982.4983	-945452.0295	-845335.5222	-786268.4792	-904910.4236	-945917.5023	-927943.1282	-808759.2219	-802929.3555	-1028246.233	-1087032.664	-1088724.94
474	-617867.6855	-756088.217	-804035.1557	-803170.2205	-712682.5058	-809721.8145	-974670.6972	-978631.3203	-926728.7133	-758877.4325	-815294.0283	-1000021.436	-997795.8295	-944059.3324	-772942.4558	-801173.3827	-1008898.896	-1012264.862	-967312.3922	-803362.1985	-698622.1715	-814498.2924	-852032.0024	-835790.6117	-716865.7365	-854020.5048	-1021304.302	-1029079.849	-981224.293	-815763.5016	-854757.5257	-1040999.807	-1042740.918	-993246.3191	-825275.8663	-835315.9348	-1043173.408	-1049830.864	-1008377.149	-847575.9803	-779376.66	-872908.3666	-900028.7866	-868410.9404	-721048.9678	-898319.1326	-1067937.823	-1079528.378	-1035719.878
475	-644251.8088	-767208.3028	-808714.2011	-803076.9891	-710586.8369	-886416.6175	-1035996.178	-1026460.519	-960910.3308	-778786.4018	-905587.024	-1080488.287	-1063883.884	-995541.6158	-808682.5461	-885050.0917	-1091223.941	-1082726.865	-1025675.644	-847110.8582	-715962.6878	-821363.3736	-854219.0019	-834288.2827	-711183.6471	-921560.8261	-1075183.97	-1071087.366	-1011215.581	-833111.8363	-934514.4579	-1112468.255	-1101493.324	-1039056.516	-857212.6667	-908835.801	-1116246.846	-1112473.146	-1060342.294	-886816.9454	-787673.5701	-875518.4427	-899723.7401	-865499.5136	-711780.4582	-956704.9722	-1114371.672	-1115714.213	-1061520.837
476	-605165.9169	-852858.3833	-965460.9387	-1031286.01	-824060.2514	-686996.3793	-981247.7713	-1107666.282	-1196136.073	-1185118.141	-615483.7708	-895152.0544	-1023439.713	-1117942.243	-1119288.28	-552003.7301	-797400.5271	-911511.6808	-991322.654	-985921.2806	-710557.4671	-905648.7232	-996550.5787	-1051183.764	-996329.3497	-745895.3777	-1028673.108	-1145064.089	-1222227.975	-1197159.961	-678752.7381	-947273.0127	-1065234.12	-1148171.539	-1134230.729	-616883.2409	-852780.2347	-957497.1379	-1026777.156	-1006130.475	-815949.0172	-958439.0631	-1027640.182	-1071081.454	-1168598.448	-804794.305	-1076098.383	-1182461.912	-1248319.877
477	-580274.1926	-786592.6613	-868391.4117	-815272.4774	-810840.6007	-663450.4613	-901930.4294	-976822.4603	-996668.7249	-887523.9474	-621482.5677	-857994.5225	-931368.4134	-954796.0714	-847171.8541	-597787.6245	-822597.0251	-889793.8252	-909053.1369	-804572.2447	-683530.569	-848850.053	-920965.6635	-924345.0589	-826935.1716	-725537.7903	-958403.4037	-1029050.311	-1044780.755	-931389.8736	-684143.511	-914897.3612	-983924.7823	-1003217.484	-891120.4588	-657464.4616	-876929.7065	-940071.1974	-955549.906	-846450.189	-786786.9499	-911107.4491	-973539.8573	-1033417.578	-843029.7424	-787625.0523	-1014876.307	-1081278.161	-1092892.777
478	-655552.7136	-768052.9047	-860623.1899	-858206.3971	-765561.9932	-910449.2373	-1075482.48	-1088190.062	-1038603.588	-875545.5766	-914518.2856	-1091869.172	-1100939.819	-1051629.526	-885958.878	-876793.2054	-1066456.459	-1082713.262	-1044043.094	-885862.1247	-734049.1869	-818882.5192	-897175.9873	-882491.9742	-762662.4308	-944183.9068	-1110718.606	-1126393.611	-1080421.386	-919069.4107	-944018.6624	-1122365.048	-1134415.386	-1088853.007	-925441.3015	-902887.8056	-1092711.544	-1111338.09	-1075755.921	-919775.4329	-812545.6561	-869712.1348	-933728.7283	-906777.4909	-759762.8683	-977918.4974	-1145954.668	-1164597.159	-1122239.168
479	-651033.7997	-844700.6978	-763723.9765	-917618.3453	-830575.5411	-832498.7573	-1063636.251	-1127576.344	-1101216.2	-961434.1507	-811272.5299	-1046447.05	-1110082.359	-1081900.718	-941470.024	-768986.5273	-999547.0374	-1057921.912	-1033296.396	-898160.4888	-741658.4475	-913572.6038	-965783.5564	-956595.3367	-831697.8218	-875692.6483	-1102170.485	-1163144.679	-1137328.163	-996332.3373	-853138.5589	-1083263.828	-1143846.628	-1116415.25	-974895.4407	-808789.1232	-1034282.29	-1089800.664	-1065811.767	-929502.9212	-832283.0865	-982444.5097	-1167843.065	-995572.2567	-832820.1111	-918886.4768	-1140704.656	-1198713.013	-1173440.108
480	-588912.1377	-743884.3559	-798900.0855	-803272.5382	-714982.4208	-725552.2553	-907368.37	-926140.6371	-889215.7193	-737028.1141	-716200.9821	-911712.2006	-925266.764	-887559.5315	-733719.0987	-709121.9612	-918550.3654	-934935.5583	-903260.9958	-755349.7484	-679591.6302	-806964.1332	-849631.8556	-837439.3593	-723101.6083	-779897.6327	-962173.4643	-982978.2354	-948310.0229	-796724.3798	-767227.3988	-962565.9692	-978262.4411	-942971.4122	-790226.4718	-754630.745	-962978.1563	-981083.3982	-951347.426	-804510.5494	-770271.1243	-870043.9096	-900363.5632	-871606.1179	-731220.7962	-834242.9476	-1016978.483	-1039815.834	-1007404.33
481	-619238.1978	-753920.8744	-839238.4329	-841813.578	-751714.6315	-807528.7285	-987116.7985	-1010008.228	-972674.9223	-821721.2386	-799148.0081	-988029.4459	-1007357.72	-970577.6934	-818209.9183	-774578.3705	-971122.5751	-994772.9197	-965698.9044	-819654.3864	-706990.0684	-811057.0569	-881582.3688	-869931.8571	-754338.3527	-853111.3132	-1032829.502	-1057401.419	-1022264.39	-871675.7021	-841626.9891	-1030200.76	-1051226.931	-1016764.612	-865148.7153	-812908.0365	-1008555.704	-1033493.461	-1006281.839	-860928.5179	-794741.9362	-868193.2401	-923926.2465	-898050.0751	-756962.0738	-898693.8238	-1078542.142	-1104794.611	-1071853.847
482	-642825.0832	-835993.304	-765516.1421	-909592.0196	-822753.0145	-813814.4455	-1043721.403	-1106450.341	-1081334.081	-942757.4797	-791443.6449	-1025259.772	-1087466.959	-1060741.756	-921659.8292	-752567.1569	-981867.7036	-1039017.13	-1015657.23	-881750.5473	-734770.0901	-905077.3659	-957298.3149	-948435.9239	-824889.3478	-859125.0646	-1084483.583	-1144361.641	-1119671.979	-979772.0308	-835487.5243	-1064373.444	-1123651.3	-1097551.327	-957261.843	-794278.6414	-1018631.241	-1073037.511	-1050198.825	-915002.0248	-826715.0889	-974161.4277	-1149080.417	-987279.7575	-827025.6892	-904435.6211	-1125245.7	-1182272.941	-1158009.861
483	-612508.2294	-700595.0148	-833160.5233	-835964.968	-744671.2359	-755376.182	-953010.8188	-970182.9011	-932451.8937	-786047.2801	-740107.9908	-946592.1032	-957655.4707	-919497.919	-772222.0921	-725304.3534	-936011.58	-949317.7123	-916491.5608	-774682.1256	-716782.1517	-850243.1337	-891614.236	-868661.8355	-751890.2539	-807805.0435	-1004015.372	-1022954.183	-987108.5473	-840428.3608	-790050.1378	-994627.4245	-1007620.144	-971556.3349	-824289.8173	-770385.7925	-978794.9612	-993778.204	-962788.7238	-820935.2721	-821056.0694	-999891.2526	-950067.8909	-901358.6406	-759109.2725	-860233.8332	-1055019.871	-1075725.466	-1041765.201
484	-620897.9962	-805932.3794	-842461.2922	-889927.7445	-804387.4103	-788028.3117	-1004639.24	-1048282.721	-1042188.995	-916666.2907	-765001.3045	-983742.6736	-1022390.247	-1019128.73	-895191.0464	-729633.3671	-942978.2995	-976152.4549	-976443.75	-858529.4023	-713405.6283	-859175.211	-879929.3687	-907677.0315	-803989.0388	-835670.9205	-1048752.875	-1091031.453	-1083883.292	-956033.6052	-811510.1578	-1026476.236	-1063903.728	-1059564.37	-933259.5763	-773740.6219	-983367.3933	-1015521.251	-1014635.842	-894200.5671	-805913.2671	-912418.0392	-917397.3843	-925426.2526	-803590.674	-883313.4669	-1092866.447	-1133780.199	-1125577.576
485	-604018.5854	-855085.289	-957170.6549	-1000618.267	-891358.6161	-695629.937	-988156.2253	-1107834.906	-1176819.893	-1129919.733	-625589.8657	-900232.7913	-1021622.594	-1094620.663	-1051919.408	-562286.6291	-799000.8547	-906143.9231	-963376.3396	-911555.7633	-710349.8394	-905051.2263	-984986.022	-1002139.962	-880022.172	-753480.2359	-1034493.26	-1144502.828	-1203517.69	-1145192.911	-688019.1821	-951590.496	-1063087.793	-1126053.636	-1071012.209	-626597.6386	-854088.4175	-952396.9971	-1000821.69	-936784.903	-816681.0855	-955017.1635	-1012801.335	-1003661.611	-868685.7359	-811330.4723	-1080830.233	-1181170.75	-1230215.456
486	-544604.7923	-796461.9646	-828500.8891	-811025.0772	-714912.6287	-948807.2496	-1062428.853	-1027901.523	-951706.3904	-767279.314	-970995.4803	-1098481.467	-1055547.313	-977707.8287	-788098.2424	-950602.9026	-1105117.567	-1071589.013	-1006163.252	-824310.7067	-783195.4484	-872657.176	-878206.4148	-843542.8812	-715155.6198	-980535.4754	-1100958.021	-1073637.072	-1003667.007	-823141.8641	-996514.3623	-1130211.87	-1094869.486	-1023521.111	-838640.6067	-970338.7945	-1129546.835	-1102905.369	-1043155.59	-866016.4124	-1021786.105	-948852.3873	-927911.8762	-876060.6225	-715398.6099	-1012263.668	-1139487.127	-1119372.635	-1055627.624
487	-596224.7422	-809391.3384	-895854.3661	-819367.678	-842583.8724	-696985.6079	-944082.4962	-1028747.772	-1058484.576	-954019.8262	-653469.6619	-897146.4111	-980942.9927	-1015086.65	-912187.8533	-619403.9502	-848433.9536	-924735.717	-952973.1364	-853061.1323	-697349.1117	-868307.9427	-947278.1249	-953409.2648	-858869.2557	-755184.3252	-995787.0868	-1075196.157	-1099778.329	-990556.229	-712600.0016	-949685.547	-1028079.215	-1057010.275	-949049.313	-676557.6309	-899558.4872	-970830.0189	-994324.0155	-889176.0319	-798473.4872	-927224.5529	-998701.8272	-1087450.789	-875154.6389	-813382.9741	-1047491.603	-1121644.541	-1141072.071
488	-610432.2766	-827312.8323	-909060.4978	-902681.1915	-860737.5229	-739851.9182	-991880.1476	-1074051.249	-1094594.374	-1010690.064	-695796.8092	-941103.1965	-1021358.819	-1042985.324	-964278.6326	-649498.3425	-875156.2621	-945504.4998	-958617.032	-882852.0632	-709298.9332	-880504.9202	-941401.7034	-914184.3783	-854876.3238	-792806.2656	-1037652.499	-1114382.122	-1130088.6	-1039655.449	-750190.4504	-988356.9278	-1063121.944	-1080041.6	-994189.1778	-703315.594	-922672.4262	-988114.9784	-997188.5681	-914079.0582	-808165.5897	-933697.0081	-973742.8465	-925687.4954	-849015.1246	-845760.5504	-1083424.773	-1154713.009	-1165582.798
489	-591240.525	-830489.2774	-926392.9658	-964490.748	-859833.392	-672015.8927	-950085.9016	-1056394.195	-1111149.324	-1050370.514	-607937.8126	-871808.0753	-978892.6249	-1037145.624	-980050.94	-557371.7315	-789674.6143	-884687.344	-930218.0172	-866333.7961	-698134.6997	-884472.5823	-959353.1368	-972529.1413	-853422.7721	-732697.0414	-1000799.541	-1098966.822	-1145373.431	-1074755.54	-672274.8605	-926487.335	-1025253.81	-1075124.576	-1007442.754	-622166.5783	-846318.7748	-933887.8537	-972040.6817	-897658.4979	-805028.8679	-938455.8872	-992313.2517	-980567.4851	-847012.1586	-793378.1276	-1051513.118	-1141539.449	-1179597.512
490	-618881.5657	-839124.9578	-922359.1403	-913690.4304	-876429.4613	-759058.1253	-1015346.413	-1101451.856	-1125236.466	-1045630.132	-714276.1635	-962850.5507	-1047204.193	-1072059.077	-998072.9003	-662151.754	-889254.0737	-962864.8437	-978167.5691	-907050.6669	-716579.0599	-890242.3572	-952087.1682	-922355.079	-868193.0338	-809755.0157	-1058405.903	-1138613.654	-1157149.298	-1070597.267	-766622.9391	-1007637.564	-1086035.669	-1105775.488	-1024158.44	-714511.6071	-934987.5146	-1003286.344	-1014213.438	-935252.1025	-814276.5541	-941359.7566	-981815.1336	-931019.6572	-859956.6063	-860451.8436	-1101465.314	-1175775.467	-1189062.097
491	-624253.0101	-809227.732	-844523.9611	-893276.9938	-807682.5826	-796599.2983	-1013325.449	-1056849.961	-1050856.002	-925221.547	-774133.107	-992986.2817	-1031452.702	-1028354.12	-904312.2517	-737154.7712	-950526.974	-983400.0675	-983959.298	-866034.846	-716106.1661	-861748.2651	-881278.3868	-910277.3129	-806666.6411	-843248.0808	-1056427.783	-1098586.043	-1091540.221	-963596.0261	-819621.9793	-1034683.629	-1071933.087	-1067754.734	-941361.5022	-780377.123	-990017.6491	-1021879.129	-1021254.993	-900821.9539	-807959.3291	-914268.7946	-918032.7517	-927277.5659	-805650.7066	-889896.8008	-1099530.055	-1140322.14	-1132224.425
492	-624365.7405	-809338.4577	-844593.268	-893389.5306	-807793.3023	-796887.2885	-1013617.31	-1057137.825	-1051147.218	-925509.0086	-774439.9409	-993296.8723	-1031757.205	-1028664.098	-904618.7295	-737407.4948	-950780.6138	-983643.5915	-984211.8248	-866287.0332	-716196.9058	-861834.7212	-881323.7146	-910364.6838	-806756.6101	-843502.6778	-1056685.664	-1098839.882	-1091797.498	-963850.1279	-819894.5412	-1034959.402	-1072202.878	-1068029.934	-941633.7316	-780600.1133	-990241.1016	-1022092.758	-1021477.4	-901044.4364	-808028.078	-914330.9811	-918054.1004	-927339.7711	-805719.9249	-890118.0047	-1099753.956	-1140541.953	-1132447.763
493	-612785.0909	-778917.598	-834727.291	-838082.5676	-749743.1319	-802110.6437	-982294.69	-1007017.438	-974696.7282	-826491.6012	-796038.227	-989021.6565	-1008439.267	-975821.6834	-826102.4852	-773057.6531	-977392.1697	-998621.6159	-971668.0093	-827729.6249	-698887.7838	-834282.1955	-876899.9127	-864246.7749	-750648.202	-847550.0686	-1027874.261	-1054154.646	-1023634.676	-875612.1163	-838245.9536	-1030778.013	-1051852.705	-1021184.076	-872071.2344	-811311.3986	-1014424.115	-1036945.191	-1011520.595	-868156.5899	-784990.4825	-889646.7901	-919072.4705	-890410.9182	-751553.2732	-892989.4311	-1073453.77	-1101291.855	-1072572.623
494	-543777.757	-790402.1222	-825351.6954	-810419.1351	-715266.0072	-918184.1821	-1039822.597	-1011807.32	-941024.8064	-761550.5238	-935587.6541	-1070156.972	-1034136.956	-961938.2033	-777808.2133	-917327.0477	-1076500.894	-1048941.955	-988229.395	-811522.8023	-772013.2341	-866252.1839	-875553.0453	-843302.9631	-716735.5043	-953244.5339	-1080892.042	-1059398.897	-994252.6338	-818145.317	-964899.6231	-1104913.55	-1075772.523	-1009462.177	-829459.8805	-940847.5543	-1104068.507	-1082744.858	-1027172.783	-854574.1491	-1000248.711	-942102.2457	-925754.3311	-876186.7285	-718205.0006	-988304.8498	-1121961.425	-1106990.487	-1047480.461
495	-623656.1222	-758527.8626	-805061.6957	-803149.7663	-712222.7351	-826547.9567	-988124.9499	-989124.6115	-934227.8493	-763245.2793	-835103.4903	-1017675.131	-1012294.947	-955354.0771	-780783.5065	-819575.1697	-1026960.262	-1027723.584	-980116.7589	-812960.2565	-702426.5231	-816004.4288	-852511.8102	-835461.0144	-715619.1378	-868838.237	-1033125.011	-1038295.916	-987804.1087	-819569.5684	-872255.4711	-1056679.335	-1055630.662	-1003296.66	-832282.5098	-851445.5248	-1059205.056	-1063574.011	-1019777.829	-856185.0911	-781196.9266	-873480.9935	-899961.8622	-867772.1998	-719015.5411	-911128.4548	-1078124.987	-1087467.221	-1041380.373
496	-602961.7181	-860100.9342	-957693.4978	-995097.2375	-927795.5289	-706069.1702	-998935.7421	-1113809.786	-1173696.711	-1121028.04	-637685.7851	-908135.2296	-1025415.234	-1091025.059	-1044120.581	-573650.7155	-801342.803	-905123.5651	-957932.5658	-906709.5505	-710128.7352	-906341.0691	-980213.909	-994099.1926	-915116.5779	-762580.6691	-1043690.408	-1149056.031	-1199605.685	-1136037.842	-699099.0169	-958379.8961	-1065956.162	-1122121.504	-1063090.56	-637379.2038	-856009.3458	-951263.7183	-995876.7556	-932417.9692	-817295.7563	-952581.1959	-1002734.25	-993101.0608	-902437.6431	-819092.1055	-1088445.027	-1184302.26	-1225514.675
497	-564692.8386	-777485.9327	-864820.1618	-901196.6238	-764252.4836	-618342.1621	-866561.0312	-947467.2909	-980469.0217	-905714.2221	-566248.6603	-809478.4992	-889250.5217	-925526.2712	-856868.9373	-542560.0454	-769252.6844	-841585.3864	-872039.6139	-802540.3493	-672375.1026	-841182.0782	-910071.9468	-930908.1261	-847029.1102	-685463.5945	-927002.9403	-1002848.073	-1030359.762	-947994.7871	-634982.8872	-871513.981	-946113.4112	-976840.9209	-900042.0045	-608622.6263	-829316.1131	-896908.2121	-922271.1469	-844610.5036	-780057.3665	-904878.2236	-955323.6804	-960619.5658	-929805.7369	-752584.9607	-987444.7869	-1058228.862	-1080250.502
498	-672493.2324	-685053.3398	-866862.513	-860887.5748	-764111.2139	-900015.2544	-1085378.695	-1079895.633	-1019878.225	-855247.7203	-901799.4199	-1101097.293	-1087421.064	-1025728.625	-858493.1042	-870884.9302	-1080109.265	-1072219.248	-1019300.822	-858967.083	-772833.7086	-894331.8944	-927281.2847	-890219.9669	-764945.7719	-936439.8568	-1121647.048	-1120305.532	-1064478.829	-901487.2652	-934181.992	-1132684.502	-1123414.576	-1066209.83	-901117.7496	-899195.1144	-1106942.849	-1102970.42	-1054067.599	-895833.5975	-873174.1768	-1103610.449	-987700.0022	-919552.2965	-765780.331	-972864.3802	-1157915.356	-1160715.431	-1109079.432
499	-576528.4693	-762831.1921	-834358.6743	-847208.6438	-761607.8745	-683569.5242	-896566.5652	-941061.8947	-934077.9136	-812415.9949	-654651.7916	-870197.8046	-911589.8946	-905653.7755	-785052.8851	-638901.4429	-850972.7264	-890033.0925	-884921.2318	-768103.3326	-675849.2581	-824986.4125	-879606.7218	-873683.0231	-767113.9386	-743008.4152	-952912.9275	-996134.4277	-988007.7286	-863566.7194	-713277.1501	-925454.8179	-965598.4539	-958608.1241	-835223.8826	-693622.8563	-902320.5201	-940196.7959	-934043.9819	-814373.5167	-775170.0487	-887141.6328	-924854.7102	-900157.34	-772620.0028	-802447.2365	-1009259.227	-1051206.968	-1041937.544
500	-624106.4265	-849082.4169	-932715.1409	-967535.929	-885995.9923	-787612.2975	-1044260.32	-1127614.917	-1151255.223	-1074084.388	-743973.9829	-990007.2172	-1072783.07	-1100648.736	-1026541.728	-684614.4032	-905765.591	-979403.6263	-1001125.409	-927016.1897	-719737.5841	-894658.4281	-959018.6733	-969804.4742	-872968.696	-834553.7717	-1083358.921	-1160890.556	-1179084.418	-1094589.762	-792943.4263	-1031322.43	-1108185.992	-1130585.1	-1048479.845	-734635.8266	-949274.2758	-1017693.209	-1034653.496	-952410.6687	-815368.7373	-940234.4393	-985322.1344	-972072.9747	-859941.3907	-881495.1835	-1122457.459	-1194166.212	-1206913.613
501	-597600.4591	-811244.0792	-890367.1599	-919118.2985	-836809.8032	-722439.6152	-966394.7973	-1038936.853	-1053042.517	-962454.2486	-680611.3514	-917738.9216	-988872.4578	-1006311.133	-918292.6474	-640600.102	-859239.8908	-923230.4691	-936586.87	-849627.6098	-697295.7817	-864585.2018	-925402.1117	-931661.0385	-832214.1065	-777159.1594	-1014677.632	-1082722.593	-1092658.32	-996089.4483	-736625.0822	-967366.7867	-1033948.947	-1047230.895	-952755.9635	-695617.6022	-908672.3047	-968616.6975	-978320.2471	-884789.6853	-796991.1013	-917926.3243	-960436.9948	-944203.7286	-827618.4036	-831878.6411	-1062960.405	-1126508.346	-1132274.123
502	-596000.0164	-781477.1534	-827153.967	-865072.5442	-779933.523	-724421.9422	-940177.7968	-984704.154	-977870.0445	-853176.6576	-697233.0502	-915144.6955	-955136.6328	-950665.9541	-827501.4351	-673816.081	-886958.6367	-922367.0108	-920669.9234	-802830.5614	-693364.5975	-840080.253	-869918.1354	-888380.0164	-784118.2154	-779439.8614	-991796.4189	-1034967.889	-1027060.263	-899911.9288	-751311.3109	-965568.1448	-1004316.846	-998782.6547	-873134.1652	-724490.3132	-934015.0089	-968338.6337	-965514.2921	-845062.4229	-790729.1835	-898683.3502	-912682.2426	-911687.4238	-788302.9127	-834457.718	-1043414.978	-1085231.634	-1076250.472
503	-577887.9756	-781815.8256	-857837.8431	-860276.6795	-800296.5612	-665874.9751	-901494.6486	-968511.7675	-976569.5961	-876110.6837	-624619.4999	-857338.4645	-921809.6571	-931001.3504	-834112.5566	-600760.9371	-820855.4311	-878637.306	-883313.8258	-789645.8035	-681257.9192	-842999.0338	-900244.2789	-882713.1221	-803584.0777	-727524.4159	-957716.1842	-1021049.034	-1025858.354	-920476.2118	-686897.0955	-914093.3037	-974864.6778	-980921.8525	-878755.9552	-660191.6802	-875238.1467	-929679.1177	-931613.528	-832526.4078	-784627.8628	-904182.2421	-942650.6521	-905149.4981	-806871.5941	-789173.7942	-1013937.649	-1073586.308	-1075147.095
504	-584668.2164	-770346.8637	-820187.1549	-853760.2144	-768803.8425	-695472.8202	-910839.5055	-955767.6859	-948596.6063	-824280.6658	-666389.7325	-883923.7462	-924527.5428	-919506.5392	-796693.9102	-648411.9991	-861462.4472	-897887.6795	-895285.6211	-777480.3873	-684243.3374	-831389.5783	-865361.7299	-879597.3796	-775074.4216	-753847.4591	-965873.8672	-1009451.719	-1001198.438	-874369.3099	-723913.0522	-937847.0881	-977197.1112	-971119.1155	-845769.3293	-702075.0549	-911553.2931	-946864.4426	-943157.6357	-822698.2141	-783818.4622	-892432.2908	-910536.2435	-905434.4803	-781345.0047	-812222.0356	-1020908.166	-1063135.76	-1053800.263
505	-572819.4676	-774730.0398	-849860.3347	-853672.5245	-790883.377	-654353.6728	-887417.8482	-952074.8586	-958188.2048	-855151.0489	-613534.2176	-844292.7944	-906305.6915	-913560.7648	-813840.2576	-593170.4858	-812398.5219	-868223.2888	-871585.9689	-775129.6928	-676890.7612	-837157.7996	-893834.3475	-877811.732	-795595.7309	-717357.3031	-945266.7587	-1006513.171	-1009625.348	-901915.0228	-677039.6744	-902527.3532	-961119.3322	-965484.7646	-860778.1773	-653475.4842	-867850.6466	-920578.2115	-921400.7532	-819825.2513	-780962.0548	-899585.5593	-937808.2978	-901950.8735	-800308.0848	-780360.8709	-1003115.599	-1060951.49	-1061062.476
506	-599601.5044	-785755.7436	-859018.2082	-871101.8859	-784705.5743	-747370.2484	-960018.0397	-1003301.117	-997237.6593	-876108.7911	-723142.8619	-938520.0667	-978856.8451	-973757.3298	-853509.9704	-695400.0465	-907160.1749	-945190.4722	-940905.4222	-824543.9428	-693415.1094	-842594.0654	-898452.7507	-891781.001	-784728.5019	-799238.7084	-1008785.967	-1050825.93	-1043607.79	-919696.026	-774003.8986	-986006.1173	-1025122.938	-1018954.896	-895918.8726	-743441.2393	-951825.3613	-988704.565	-983358.7526	-864137.5705	-787228.7171	-899432.3872	-937887.2363	-912460.0536	-784751.4295	-851107.0948	-1057553.832	-1098350.755	-1089977.92
507	-568609.9646	-769858.9789	-844049.7068	-866162.2596	-783013.165	-651157.996	-881230.5785	-941946.5834	-945623.88	-840360.4992	-611309.4473	-838696.5844	-897096.5155	-903130.8289	-799896.8792	-592460.1367	-808353.1215	-861791.942	-865998.8349	-764985.0403	-672750.4053	-831693.0727	-888634.5143	-889942.2422	-787639.4009	-714384.6846	-939558.529	-997227.5864	-998131.1043	-888356.2449	-675027.7592	-897416.2848	-952753.3211	-956063.5153	-848059.44	-652942.019	-864264.5231	-914940.0172	-916706.6221	-810830.2744	-776890.8444	-893527.1665	-933219.2559	-913722.169	-792265.6333	-777611.3107	-997886.4169	-1052508.596	-1050638.329
508	-538641.1376	-752765.1465	-805792.42	-806655.6991	-717460.7993	-727987.8764	-899417.7704	-911848.0961	-874682.7322	-725969.6751	-715673.7696	-894236.8316	-901159.7184	-863994.8969	-713898.0414	-710654.5886	-898766.0741	-908283.7097	-876844.2967	-732098.6174	-702561.8031	-826471.5244	-859073.2768	-841812.8598	-726547.983	-783743.675	-956264.5829	-970967.2494	-935781.0555	-787112.3449	-768544.1598	-947788.6342	-957163.512	-922143.7759	-772439.4592	-757680.8959	-945825.5823	-957530.2711	-927905.432	-783507.5845	-866482.4687	-900177.9023	-912354.0703	-876969.958	-735635.1664	-839499.4234	-1013111.333	-1030086.409	-996879.3788
509	-608106.5155	-858334.6192	-972773.0619	-1040737.742	-828405.6249	-691984.4975	-989580.4133	-1119305.648	-1211805.507	-1205418.421	-619060.9807	-901376.724	-1033189.319	-1131922.354	-1138354.533	-552689.8673	-799445.6275	-916592.2226	-999989.2433	-999244.9452	-713331.6324	-910332.5906	-1002833.742	-1059922.471	-1007176.859	-750286.0894	-1036060.022	-1155396.889	-1236168.288	-1215263.224	-681932.8659	-952777.336	-1073888.916	-1160619.68	-1151245.868	-617483.4214	-854485.0362	-961899.267	-1034370.11	-1017865.817	-818556.7492	-962330.5619	-1032894.386	-1079107.137	-1185948.093	-808587.61	-1082539.569	-1191488.148	-1260531.07
510	-539240.639	-757157.8057	-808075.2078	-807094.9345	-717204.6424	-750185.9285	-915804.5958	-923514.4639	-882425.5998	-730122.3611	-741340.198	-914768.6943	-916679.6605	-875425.9844	-721357.0786	-734775.5935	-919509.7304	-924700.1119	-889844.1928	-741368.3148	-710667.5678	-831114.3757	-860996.6515	-841986.7717	-725402.7562	-803526.3353	-970810.0118	-981288.2191	-942605.3476	-790734.2424	-791461.055	-966126.8824	-971006.5201	-932334.8173	-779094.3849	-779058.509	-964294.3148	-972144.2244	-939491.0505	-791801.8534	-882094.4965	-905070.9456	-913918.0317	-876878.5463	-733600.8696	-856866.6935	-1025815.365	-1039061.981	-1002785.095
511	-612359.4924	-797545.7134	-837211.8039	-881403.9114	-796001.2034	-766215.1672	-982532.8572	-1026479.111	-1020131.478	-894893.1797	-741760.8848	-960217.7087	-999326.3179	-995650.1315	-871977.5965	-710491.4079	-923766.9373	-957707.2949	-957316.6949	-839428.0627	-706532.7647	-852626.7933	-876496.1201	-901059.3204	-797174.5461	-816387.0622	-1029220.249	-1071805.035	-1064396.424	-936787.2586	-790865.5879	-1005588.438	-1043469.025	-1038719.912	-912640.1903	-756850.7395	-966442.5051	-999340.4616	-997790.1161	-877349.1504	-800706.0431	-907707.8701	-915780.3754	-920714.6638	-798347.8949	-866558.8947	-1075907.579	-1117130.972	-1108661.358
512	-563686.9838	-780470.6208	-861340.1491	-885504.0229	-808570.1118	-626401.763	-873957.0099	-949851.0523	-970531.0371	-877847.3576	-575677.7536	-814904.9389	-889889.9386	-913707.0573	-824285.8124	-551812.7066	-770897.1153	-838743.0925	-857561.7582	-768347.4746	-672132.8558	-841379.3587	-902945.1793	-906285.0198	-812031.9781	-692513.737	-933275.6042	-1004338.389	-1020380.055	-921445.0216	-643625.9338	-876152.4144	-946239.3753	-965425.3557	-869226.4887	-617384.348	-830662.4358	-894146.5004	-908881.858	-812805.4847	-780578.7295	-902288.0932	-944550.1435	-927065.9438	-815493.8515	-758625.6485	-992594.1429	-1058825.719	-1070229.08
513	-627881.4891	-790082.6725	-843480.4539	-844739.9536	-755593.7308	-847371.2665	-1021121.9	-1041615.258	-1004746.006	-851623.8885	-847343.7621	-1035928.622	-1050748.64	-1013294.354	-858099.7279	-818750.3265	-1021487.39	-1038925.001	-1008061.997	-859068.6225	-709503.1362	-842269.3234	-883014.771	-868804.0797	-753683.4239	-887452.936	-1061962.591	-1084568.935	-1050062.282	-897690.9656	-883660.4163	-1072352.548	-1089398.46	-1054465.642	-900527.3959	-851485.0736	-1053413.325	-1072630.303	-1043783.578	-896021.1252	-791124.7901	-894455.9709	-922549.024	-892868.1414	-751773.1183	-927534.543	-1102803.22	-1127522.613	-1095378.558
514	-618016.7063	-753445.523	-838519.1255	-841262.1818	-751248.8554	-804066.8477	-984144.4905	-1007378.469	-970457.3159	-819910.7789	-795267.3613	-984536.6459	-1004209.95	-967851.3973	-815931.0837	-771140.2261	-967915.8815	-991814.9186	-963063.6838	-817427.393	-706079.8957	-810793.8361	-881057.8548	-869509.3793	-754058.3602	-850047.9543	-1030209.589	-1055080.767	-1020308.195	-870081.5459	-838182.8965	-1027100.68	-1048428.767	-1014339.814	-863120.6866	-809881.4364	-1005725	-1030875.044	-1003944.978	-858949.1165	-794143.0822	-868142.1498	-923596.5257	-897756.5158	-756867.865	-896028.9869	-1076274.624	-1102783.065	-1070159.063
515	-621690.3886	-784979.5836	-821204.4598	-807703.9546	-712213.9108	-940445.3006	-1076201.736	-1050313.425	-972662.1213	-782429.7843	-961354.677	-1122914.992	-1090501.169	-1010598.387	-814598.3215	-931100.5771	-1129019.652	-1108942.688	-1042837.506	-855326.2036	-693263.9589	-837924.1049	-867178.1383	-839038.9917	-711333.3039	-970438.6431	-1111678.711	-1092752.221	-1021842.85	-836344.7236	-984884.8898	-1150814.103	-1125567.989	-1052650.462	-862389.3812	-949513.5853	-1149794.299	-1135873.853	-1075722.148	-893961.0592	-764837.5264	-890868.6299	-913151.7552	-870373.9662	-710452.6983	-1000431.923	-1147155.639	-1135191.002	-1071023.594
516	-587767.1684	-741673.7183	-820705.8902	-827607.1683	-739714.1761	-718335.35	-910536.9817	-942253.9778	-915539.561	-775075.7779	-699165.3618	-898039.4513	-926257.2308	-900336.2332	-759497.0468	-685996.5458	-888503.9478	-918561.7121	-897803.9529	-762277.1743	-683539.9881	-804275.3237	-868068.5654	-859046.9587	-747124.5071	-774185.6218	-965328.9384	-997611.1338	-971864.1445	-830603.1788	-752891.9122	-950328.9794	-979133.8232	-954291.0818	-812897.7156	-734929.4131	-935624.2361	-966031.4406	-946073.9359	-809930.3717	-779312.806	-866876.9295	-915431.1809	-890486.6875	-754534.8382	-830035.8238	-1020120.833	-1052968.29	-1028188.721
517	-678125.7676	-683593.9912	-870027.098	-863227.784	-765936.6095	-913596.727	-1097807.914	-1090197.555	-1028087.475	-861745.5764	-916982.0928	-1115605.185	-1099605.931	-1035703.588	-866593.871	-884554.8092	-1093639.901	-1083759.587	-1028954.515	-866881.3611	-778096.897	-898471.7875	-930630.387	-892244.2551	-766171.6728	-948518.5445	-1132692.552	-1129446.732	-1071743.825	-907220.6387	-947715.8373	-1145647.932	-1134287.564	-1075097.704	-908331.82	-911290.1883	-1118975.815	-1113223.466	-1062638.6	-902866.4796	-878068.0179	-1113349.584	-991233.622	-921260.6637	-766406.7371	-983440.2825	-1167577.145	-1168695.909	-1115400.175
518	-573413.8536	-793726.9576	-886505.9283	-929227.8866	-777139.6783	-633135.5626	-891273.3789	-981986.4791	-1026940.298	-965919.3232	-576857.6911	-827939.1746	-918165.1979	-966987.4756	-913414.2538	-544594.9417	-775317.8954	-856652.8902	-897742.3582	-842054.711	-680602.5216	-855073.1535	-928706.0977	-956824.7522	-879199.8687	-698485.2501	-948910.5168	-1033492.345	-1071702.937	-1001684.136	-644414.2807	-887838.3052	-971781.1769	-1013758.718	-950504.2739	-610402.5982	-834372.0902	-909963.7283	-944789.7818	-879414.3325	-787791.1895	-916419.3493	-970906.2188	-984421.5554	-981260.0591	-763834.8704	-1006547.592	-1084998.219	-1116465.576
519	-578934.5186	-784677.8186	-866084.82	-814928.5247	-808174.5086	-660633.871	-898390.1108	-972461.2947	-991476.8607	-881939.0115	-618795.9972	-854706.1865	-927204.6839	-949732.3137	-841711.212	-595972.0865	-820427.002	-886859.0835	-905364.3311	-800499.7016	-682369.9606	-847215.8003	-918755.7009	-921903.9794	-824253.0533	-723047.8014	-955263.5779	-1025174.558	-1040161.553	-926420.5385	-681753.473	-911975.5292	-980216.2867	-998699.4698	-886255.0604	-655860.8415	-875029.1332	-937487.7885	-952293.2995	-842861.6795	-785805.407	-909753.7864	-971426.5235	-1028879.372	-840331.5979	-785461.665	-1012136.974	-1077887.821	-1088846.236
520	-664823.2464	-775878.5227	-812362.4062	-803004.2975	-708952.8647	-946214.7898	-1083811.044	-1063752.468	-987561.3969	-794309.2265	-975987.5715	-1143227.488	-1115412.08	-1035681.838	-836548.7377	-950447.9246	-1155411.956	-1137665.385	-1071180.89	-881221.2514	-729482.9153	-826716.0089	-855924.1836	-833116.9317	-706753.3787	-974221.3405	-1117193.409	-1103840.208	-1034599.488	-846638.1598	-996700.1419	-1168191.491	-1147301.989	-1074774.269	-882113.4711	-966158.5068	-1173221.476	-1161314.709	-1100858.999	-917412.7343	-794142.5881	-877553.493	-899485.8985	-863229.5033	-704553.8937	-1002227.829	-1150575.68	-1143927.947	-1081637.587
521	-613481.7829	-798648.0465	-837901.7902	-882524.2737	-797103.4762	-769082.2603	-985438.4932	-1029344.951	-1023030.691	-897755.0109	-744815.5773	-963309.8014	-1002357.813	-998736.1299	-875028.7441	-713007.4037	-926292.0554	-960131.7042	-959830.7317	-841938.7195	-707436.1255	-853487.5093	-876947.3821	-901929.1443	-798070.2347	-818921.709	-1031787.594	-1074332.132	-1066957.754	-939316.9749	-793579.085	-1008333.905	-1046154.937	-1041459.682	-915350.3773	-759070.7251	-968667.0918	-1001467.245	-1000004.298	-879564.08	-801390.4743	-908326.969	-915992.913	-921333.9493	-799036.9994	-868761.0953	-1078136.632	-1119319.326	-1110884.805
522	-588042.4578	-760295.8869	-808888.4963	-806072.2888	-714950.0434	-796588.5099	-962326.631	-964388.5022	-913293.4159	-749083.135	-795010.0583	-977472.3764	-974215.6064	-922198.3444	-754975.7456	-778791.7697	-982378.3621	-985793.6537	-942586.5096	-781968.5641	-674179.4033	-820533.6142	-858680.1705	-839620.5926	-720392.6324	-843253.21	-1011179.016	-1017010.558	-969630.4613	-807264.6554	-837523.2239	-1021380.492	-1022031.352	-973914.4599	-809153.7224	-815890.7308	-1019632.725	-1026355.344	-986422.9729	-828248.4343	-760316.3471	-880771.3438	-908471.7827	-873168.8339	-725835.2223	-889917.8476	-1060031.347	-1069632.605	-1025967.516
523	-619469.384	-783350.2827	-820391.5179	-807596.253	-712394.5152	-930949.7214	-1068685.163	-1044641.764	-968743.3613	-780228.6665	-950374.74	-1113314.737	-1082825.489	-1004763.351	-810662.8042	-921047.1042	-1119340.276	-1100813.969	-1036220.221	-850484.0737	-692004.2415	-836776.2079	-866617.2115	-839077.3815	-711931.2845	-962043.493	-1105045.011	-1087752.728	-1018396.459	-834425.2307	-975157.9638	-1142270.557	-1118733.829	-1047453.322	-858875.4462	-940693.5193	-1141202.702	-1128644.846	-1069827.762	-889623.5551	-764539.0962	-890202.1367	-912842.8435	-870558.4475	-711468.0551	-993137.2021	-1141404.811	-1130863.678	-1068049.57
524	-677479.5727	-781212.7698	-814606.9199	-802959.5749	-707947.5833	-983004.8864	-1113228.557	-1086695.886	-1003958.14	-803859.4551	-1019300.65	-1181827.017	-1147114.174	-1060377.621	-853693.0724	-990683.144	-1194902.85	-1171465.64	-1099177.437	-902207.255	-737801.0704	-830009.1525	-856973.2758	-832396.2723	-704027.7101	-1006620.08	-1143039.205	-1123990.994	-1048986.152	-854960.0654	-1034959.126	-1202474.532	-1175485.211	-1096749.182	-897433.3875	-1001425.603	-1208274.422	-1191363.885	-1125786.408	-936236.4203	-798122.5726	-878805.5329	-899339.5693	-861832.907	-700107.838	-1030235.211	-1172849.755	-1161286.103	-1094014.173
525	-639941.4884	-799002.0709	-850473.0582	-850058.313	-760267.5754	-883528.4395	-1052139.638	-1069254.28	-1028751.353	-871701.2186	-888330.0101	-1073401.003	-1084548.16	-1043229.997	-883661.2373	-855252.65	-1056713.562	-1071122.006	-1037135.917	-884104.2824	-717983.3803	-848649.9684	-887899.7235	-872444.7555	-756108.1594	-919329.9803	-1089194.599	-1108865.877	-1071174.399	-915329.0078	-919940.4868	-1105565.031	-1119392.488	-1081053.155	-923260.0561	-883578.4569	-1084560.479	-1101137.926	-1069557.379	-918281.1553	-796025.2799	-898297.862	-925326.3243	-894831.1335	-751948.7451	-955131.4586	-1126249.498	-1148477.474	-1113597.445
526	-591907.7681	-777457.6764	-824638.045	-860987.3271	-775914.266	-713967.5576	-929582.8716	-974254.3391	-967298.5397	-842741.4599	-686094.6154	-903869.8868	-944082.7846	-939413.3673	-816375.9262	-664641.9153	-877751.2082	-913526.7998	-911502.9007	-793675.8633	-690070.6406	-836941.7932	-868272.6826	-885208.3463	-780852.2339	-770197.6876	-982435.0183	-1025753.245	-1017720.793	-890687.7333	-741416.9889	-955557.2509	-994523.1075	-988792.5321	-863251.9132	-716395.5001	-925903.4186	-960583.6678	-957440.6419	-836986.0453	-788233.5175	-896425.9076	-911907.2588	-909429.3008	-785790.2062	-826427.7551	-1035287.103	-1077252.16	-1068143.037
527	-589972.9523	-824564.7367	-927681.9551	-982452.4764	-801609.3449	-661224.6531	-938196.1514	-1047530.071	-1115178.013	-1080234.252	-597001.6755	-862991.5332	-973067.1762	-1045712.277	-1020780.137	-548458.7176	-786834.2644	-885262.4366	-946545.6546	-917082.9289	-696224.4008	-881448.9466	-964087.8443	-1006034.159	-940284.3601	-723210.2255	-990507.7073	-1091678.407	-1150203.629	-1103627.227	-662322.2163	-918834.2496	-1020518.057	-1083856.688	-1046319.921	-613782.3345	-843972.1681	-934752.9968	-987547.2244	-945498.3879	-802475.8493	-938333.1564	-1000493.691	-1029615.778	-1078959.375	-785195.7286	-1042819.201	-1135826.756	-1185229.245
528	-645996.536	-691918.4398	-851975.6022	-849878.7107	-755524.1476	-836124.9919	-1026908.89	-1031433.104	-981260.0899	-824680.3624	-830376.756	-1032848.949	-1030100.745	-978804.1834	-820385.2989	-806578.7845	-1016458.145	-1017930.934	-973887.7081	-821736.5618	-748074.5019	-874856.9182	-911526.3641	-880697.2657	-759178.8622	-879619.0278	-1069686.547	-1077303.298	-1030302.672	-874516.2029	-870515.7789	-1071701.652	-1072265.626	-1024399.298	-867181.1605	-842297.2011	-1050337.106	-1054737.814	-1013747.71	-862749.3582	-850152.4614	-1057795.397	-971077.0701	-911515.7581	-762833.5776	-923112.988	-1112464.155	-1123173.492	-1079345.254
529	-567350.2344	-782434.7639	-871428.0697	-909738.0791	-768179.3633	-622849.8851	-874091.174	-957985.6932	-994629.3656	-924059.424	-569481.3567	-815103.684	-898061.1634	-938159.9875	-874098.9599	-543180.1022	-771100.8255	-846176.6319	-879871.5422	-814580.8397	-674882.0938	-845414.8521	-915749.9916	-938805.2267	-856831.9185	-689431.446	-933678.4364	-1012185.743	-1042957.513	-964354.5627	-637856.7437	-876488.1945	-953934.6811	-988090.2076	-915418.4511	-609165.0046	-830856.7287	-900886.3813	-929132.8396	-855215.6394	-782413.9533	-908394.9403	-960071.863	-967872.3118	-945484.4736	-756012.9404	-993265.6362	-1066385.8	-1091285.661
530	-612599.7327	-832796.6836	-924048.1039	-823571.8512	-875171.8259	-731413.1178	-987356.2207	-1082054.806	-1121945.335	-1022285.147	-686307.9259	-937340.1233	-1031836.741	-1076981.549	-978933.9148	-641595.4819	-874958.3974	-960607.4053	-998061.8381	-902840.2992	-711535.3629	-888283.6027	-974290.7554	-983246.8632	-891653.0991	-785619.7484	-1034165.542	-1122569.935	-1156239.378	-1051296.989	-741813.7134	-985399.4391	-1073408.587	-1112234.481	-1008519.642	-696158.8656	-922789.4152	-1002407.326	-1034129.896	-933038.8005	-810471.0008	-943770.5295	-1024533.352	-1142921.813	-908134.3723	-839826.3088	-1080974.786	-1163085.063	-1190533.405
531	-601391.8313	-856917.9571	-953842.0687	-990716.5855	-923029.8592	-702884.7103	-993940.1013	-1107256.04	-1165575.787	-1111307.64	-635207.2046	-904408.6352	-1019998.026	-1083937.317	-1035333.362	-572777.8082	-800125.8301	-902470.2096	-953920.5512	-901178.9517	-708609.9666	-903744.4244	-977125.329	-990589.0909	-910996.0878	-759779.9588	-1039276.915	-1143271.388	-1192441.691	-1127460.153	-696881.6509	-955093.1052	-1061170.852	-1115858.056	-1055341.439	-636579.9708	-854996.181	-948980.633	-992399.4019	-927636.8276	-815828.1059	-950570.8837	-1000408.519	-990461.5099	-898962.3322	-816675.1447	-1084613.682	-1179286.721	-1219307.61
532	-569891.1392	-771751.8009	-850514.3274	-812606.6954	-790177.2323	-641620.667	-874491.4276	-943021.5381	-956429.5295	-844238.2755	-600660.4824	-832508.4948	-899097.7071	-915549.7562	-804849.5137	-583716.4189	-805778.4066	-867048.3063	-880463.2945	-773008.2723	-674535.3513	-836183.8871	-903837.4958	-905425.6355	-806147.5933	-706239.2983	-934068.3942	-999011.5474	-1008979.936	-892875.3747	-665619.6816	-892251.8977	-955182.3353	-968200.9207	-853411.5147	-645035.7114	-862199.4405	-920048.6595	-930309.7948	-818637.6862	-779179.5669	-900615.9768	-957160.6051	-998244.5132	-822117.9542	-770857.8636	-993645.2914	-1055001.557	-1061530.335
533	-579699.9186	-754175.9056	-805834.9235	-805667.7398	-715628.4296	-760921.2076	-934092.8731	-943084.6057	-898573.7662	-740815.2943	-753767.2099	-941411.8907	-945384.2089	-900280.776	-740193.1523	-741028.9067	-946020.6816	-955260.5533	-917730.6612	-763780.5516	-669447.6516	-816221.8825	-856573.2169	-839764.7925	-722638.7677	-811719.3404	-986261.5058	-998231.4601	-956685.1213	-800054.6545	-800986.9363	-989289.2179	-996360.8747	-954392.9568	-795954.6768	-782760.7915	-987360.9626	-999201.7441	-964282.4771	-811955.8975	-759195.3832	-878267.8613	-907311.4483	-873861.7827	-729649.1065	-862517.4106	-1038430.084	-1053378.307	-1014796.484
534	-574121.9097	-795045.5607	-888266.588	-931503.7349	-778185.9851	-634336.6336	-893279.7656	-984789.0797	-1030713.284	-970807.354	-577719.0346	-829437.9903	-920512.7702	-970353.6961	-918005.148	-544760.1542	-775810.3277	-857876.2155	-899829.1549	-845262.868	-681270.5028	-856200.965	-930218.9978	-958928.9139	-881811.8012	-699542.4737	-950689.1852	-1035980.342	-1075059.575	-1006043.155	-645180.0122	-889163.6713	-973865.1337	-1016756.061	-954601.2877	-610547.1135	-834782.5832	-911023.7011	-946618.0618	-882240.0431	-788419.0959	-917356.3692	-972171.3596	-986354.0305	-985437.6173	-764748.2465	-1008098.542	-1087171.614	-1119405.865
535	-608654.3629	-827157.429	-917255.1399	-822558.9029	-867320.1251	-723118.1966	-976929.9035	-1069211.076	-1106655.179	-1005837.385	-678395.9156	-927655.9005	-1019574.465	-1062068.669	-962852.2021	-636248.6819	-868567.6311	-951964.5255	-987198.2226	-890846.5689	-708117.3453	-883470.6921	-967782.3659	-976057.8295	-883754.2008	-778286.6755	-1024918.685	-1111155.756	-1142635.723	-1036662.186	-734774.9982	-976794.5785	-1062486.985	-1098928.83	-994190.9352	-691436.1686	-917192.1844	-994799.1292	-1024539.117	-922470.5598	-807580.3348	-939783.9625	-1018309.537	-1129556.693	-900188.2765	-833455.0848	-1072907.389	-1153100.435	-1178616.253
536	-632360.678	-818304.0996	-894029.8979	-905025.5921	-817499.7667	-837954.7331	-1050106.659	-1091668.576	-1086912.081	-966540.0391	-820386.716	-1035524.246	-1074362.69	-1070450.987	-950705.5723	-775616.9556	-986935.3049	-1023503.107	-1020391.965	-904678.5127	-718355.1646	-867593.4708	-925210.4066	-917476.5713	-809737.7185	-879074.6694	-1088114.698	-1128477.111	-1122548.945	-999388.6061	-860223.9421	-1071977.058	-1109636.004	-1104635.447	-982093.8253	-814173.5484	-1022112.503	-1057576.06	-1053376.031	-934792.7428	-804349.6553	-916882.8419	-956390.861	-929927.4881	-801975.6704	-920194.5267	-1126122.675	-1165285.663	-1158185.809
537	-608704.8921	-827229.6522	-917342.1389	-822571.876	-867420.6836	-723224.4314	-977063.4357	-1069375.569	-1106851.003	-1006048.036	-678497.2464	-927779.9284	-1019731.511	-1062259.662	-963058.1642	-636317.1596	-868649.479	-952075.2168	-987337.3553	-891000.1752	-708161.1206	-883532.3321	-967865.7203	-976149.901	-883855.3638	-778380.5918	-1025037.111	-1111301.94	-1142809.948	-1036849.617	-734865.1445	-976904.7829	-1062626.86	-1099099.238	-994374.4461	-691496.6532	-917263.8694	-994896.5691	-1024661.948	-922605.9096	-807617.3562	-939835.0194	-1018389.246	-1129727.864	-900290.0439	-833536.6824	-1073010.71	-1153228.311	-1178768.879
538	-654734.1115	-689654.598	-856884.7239	-853509.0041	-758355.8267	-857193.505	-1046189.948	-1047414.153	-993994.8426	-834760.2831	-853929.1609	-1055354.587	-1049002.747	-994278.0314	-832951.7646	-827784.4396	-1037447.798	-1035833.1	-988863.1794	-834013.7335	-756239.1212	-881279.0047	-916721.7216	-883837.4806	-761080.5638	-898356.3178	-1086821.091	-1091483.755	-1041572.634	-883410.2058	-891510.4093	-1091811.414	-1089132.552	-1038186.778	-878372.122	-861059.9105	-1069003.469	-1070643.044	-1027043.635	-873659.2481	-857744.1239	-1072903.411	-976558.6638	-914165.8946	-763805.3018	-939519.0539	-1127452.186	-1135553.358	-1089150.424
539	-587576.4038	-795360.2702	-873086.8114	-872900.4894	-818289.8166	-687897.8879	-928402.3833	-999930.8382	-1011705.535	-916174.9229	-645808.9626	-882275.199	-951445.4112	-964338.9442	-872862.9566	-615270.0474	-837020.7715	-898543.6486	-905731.5667	-817393.2778	-689605.7203	-854164.5245	-912496.8313	-892082.1052	-818853.7632	-746958.8021	-981513.1999	-1048834.265	-1056887.665	-955955.8333	-705739.5074	-936201.5613	-1001138.838	-1010429.77	-913120.3894	-673029.6558	-889359.3168	-947075.4551	-951135.1969	-856804.6063	-791635.0367	-912968.7787	-951906.7886	-911263.6535	-819417.7099	-806019.6538	-1034623.944	-1097737.702	-1102069.776
540	-546461.0403	-810063.0428	-835569.1306	-812385.0905	-714119.4848	-1017539.521	-1113167.707	-1064024.33	-975680.7858	-780137.3584	-1050466.954	-1162054.683	-1103602.019	-1013102.133	-811193.808	-1025289.251	-1169346.564	-1122419.447	-1046415.09	-853012.6555	-808293.489	-887032.9288	-884161.7982	-844081.3679	-711609.6311	-1041788.921	-1145995.322	-1105594.096	-1024797.199	-834356.4176	-1067472.402	-1186992.953	-1137731.868	-1055075.835	-859246.3859	-1036530.724	-1186731.939	-1148154.844	-1079028.371	-891698.1225	-1070125.938	-964002.8148	-932754.4011	-875777.5826	-709099.7763	-1066038.292	-1178822.875	-1147163.879	-1073913.612
541	-542616.7028	-781894.8597	-820930.6204	-809568.468	-715762.1064	-875193.2173	-1008086.234	-989213.0666	-926029.1956	-753508.0174	-885879.4853	-1030392.916	-1004079.486	-939799.6175	-763362.2968	-870611.9006	-1036326.658	-1017148.311	-963052.4978	-793570.1806	-756314.8008	-857260.3745	-871828.0458	-842966.1481	-718953.465	-914931.4582	-1052721.912	-1039410.276	-981036.0282	-811130.7885	-920516.475	-1069397.867	-1048962.771	-989725.1884	-816571.2867	-899445.5337	-1068300.115	-1054442.016	-1004734.917	-838510.6396	-970012.8988	-932625.8894	-922725.4072	-876363.7655	-722144.8229	-954669.66	-1097357.527	-1089607.497	-1036042.861
542	-583383.9454	-757172.9424	-817679.9786	-825116.907	-738348.7379	-713962.852	-906676.3575	-939636.0982	-916173.9481	-777544.9563	-696117.6042	-897667.5122	-926039.212	-902841.3978	-763785.9261	-684068.4169	-891514.0702	-920128.3429	-900788.5238	-766695.0375	-678213.7452	-818726.7823	-864990.8576	-855371.1491	-744736.9244	-769836.8288	-961485.1835	-994920.9852	-972165.3185	-832612.2261	-749798.5495	-949809.0998	-978730.0841	-956366.2176	-816651.1441	-733070.7446	-938490.2791	-967446.2843	-948686.4889	-813888.7275	-773043.5486	-880280.6204	-912301.6732	-885625.3278	-751125.1116	-825710.743	-1016293.947	-1050205.872	-1028156.689
543	-598254.3852	-810288.1125	-889893.2733	-886813.6655	-838120.8606	-712170.169	-958058.4106	-1034558.979	-1050430.177	-960331.229	-669162.667	-909758.9127	-984108.0915	-1001081.561	-915571.2311	-631261.084	-854837.2016	-920483.1781	-930439.0027	-847974.8137	-698806.1461	-866470.432	-926000.8304	-902408.0141	-835683.0585	-768378.1707	-1007740.787	-1079457.414	-1091086.238	-995059.2598	-726506.4388	-960567.9042	-1030096.58	-1042951.557	-950994.7259	-687178.872	-904922.79	-966248.6134	-972650.763	-883562.5227	-799357.9069	-922652.7514	-962108.3251	-918002.2943	-833245.2564	-824586.1097	-1057423.088	-1124355.862	-1131742.275
544	-603527.2929	-849806.7967	-961386.3194	-1026019.112	-821638.8284	-684216.7922	-976604.4763	-1101180.344	-1187404.412	-1173805.981	-613490.4005	-891683.4094	-1018006.827	-1110151.943	-1108663.77	-551621.3858	-796260.9121	-908680.5914	-986493.2698	-978496.7802	-709011.5867	-903038.6774	-993049.3388	-1046314.192	-990284.6661	-743448.6904	-1024556.812	-1139306.222	-1214459.852	-1187072.07	-676980.6385	-944205.7747	-1060411.308	-1141234.917	-1124749.185	-616548.7953	-851830.2483	-955044.0884	-1022546.046	-999591.0539	-814495.8804	-956270.5581	-1024712.321	-1066609.21	-1158930.504	-802680.5176	-1072509.085	-1177432.118	-1241515.292
545	-571696.2263	-790528.2442	-882234.8584	-923707.0542	-774601.5108	-630221.9627	-886406.2157	-975187.8324	-1017787.655	-954061.767	-574768.2141	-824303.295	-912470.3749	-958821.5802	-902277.5021	-544194.1634	-774123.3358	-853685.305	-892680.1338	-834272.2515	-678982.1093	-852337.2689	-925036.0517	-951720.4032	-872863.7516	-695920.6001	-944595.7609	-1027456.873	-1063560.288	-991109.8747	-642556.7425	-884623.1858	-966725.8416	-1006487.659	-940565.5946	-610052.028	-833376.3019	-907392.4094	-940354.6762	-872559.6251	-786267.9923	-914146.2937	-967837.1961	-979733.6897	-971125.9924	-761619.1705	-1002785.244	-1079725.923	-1109332.92
546	-569830.4367	-792926.5949	-876411.9826	-902646.8695	-827219.6518	-638863.5395	-893506.4979	-975497.8904	-1002310.724	-915886.2925	-585377.2061	-829488.2558	-911089.1466	-941443.5857	-858672.9207	-555228.663	-775659.5064	-849126.4932	-873262.0127	-789990.419	-678076.2669	-851540.8331	-915031.7486	-920021.1339	-828156.7309	-703473.783	-950546.9658	-1026975.487	-1048414.979	-955012.171	-652303.1732	-889014.6442	-964965.7767	-989936.1618	-899551.195	-620511.9937	-834627.2633	-903080.9195	-922489.819	-831515.5708	-786322.0993	-910155.067	-953651.4479	-937395.3231	-829093.8183	-768083.964	-1007587.38	-1078453.075	-1094519.244
547	-596111.1204	-846211.2095	-940886.8141	-975981.1557	-906999.3252	-692172.9753	-977136.0014	-1085210.857	-1138259.009	-1078610.617	-626869.8728	-891873.2934	-1001775.881	-1060095.905	-1005775.329	-569841.5639	-796032.2346	-893544.9783	-940425.1264	-882575.3853	-703501.205	-895009.9537	-966736.1097	-978781.9769	-897135.7782	-750359.062	-1024431.018	-1123813.28	-1168343.788	-1098606.93	-689422.98	-944037.1535	-1045074.25	-1094789.37	-1029275.314	-633891.549	-851588.145	-941300.8989	-980702.4441	-911554.2502	-810891.2933	-943808.6906	-992585.3355	-981582.7136	-887272.2459	-808545.0863	-1071725.987	-1162415.688	-1198428.581
548	-577852.5561	-804719.2757	-894146.2296	-926638.8297	-826803.4402	-647274.7285	-910198.4466	-1002498.172	-1042344.239	-967024.3378	-589443.2109	-842026.6216	-934123.1159	-976927.2497	-904752.1246	-552222.2413	-779903.2238	-862206.6228	-895477.0178	-818953.3432	-685336.5202	-862911.7008	-932496.7705	-941504.9687	-825553.7585	-710921.846	-965497.5894	-1051257.341	-1084453.893	-1000956.128	-655779.048	-900185.9772	-985613.977	-1021764.624	-940839.0708	-617524.0196	-838178.2799	-914495.252	-941885.9292	-856664.5537	-792820.4794	-921104.126	-970847.2539	-956371.0552	-824304.0818	-774568.901	-1020796.67	-1100016.51	-1126563.527
549	-625699.9343	-759389.2657	-805424.1519	-803142.5443	-712060.3968	-832489.0206	-992875.4492	-992829.6387	-936875.6842	-764787.5019	-842097.9206	-1023908.392	-1017414.373	-959342.0858	-783552.0665	-826072.5707	-1033337.465	-1033181.833	-984637.7929	-816349.19	-703769.7838	-816536.2234	-852681.2233	-835344.6384	-715178.982	-874070.1608	-1037298.73	-1041549.974	-990127.3451	-820913.4348	-878433.739	-1062215.546	-1060181.841	-1006845.287	-834756.4529	-857140.6463	-1064865.595	-1068426.514	-1023803.242	-859224.8419	-781839.6361	-873683.1797	-899938.2321	-867546.6699	-718297.568	-915651.2385	-1081721.925	-1090270.31	-1043379.011
550	-583908.7183	-790232.8376	-867314.1083	-868121.5756	-811478.2266	-679560.8166	-918216.0966	-988036.7243	-998404.3507	-901008.0636	-637787.4051	-872835.0611	-940226.3959	-951718.5474	-858193.4689	-609777.4276	-830901.1634	-891007.8335	-897245.0279	-806889.0963	-686445.5473	-849937.6771	-907858.4619	-888535.35	-813073.2174	-739601.6525	-972504.5179	-1038315.79	-1045141.1	-942524.543	-698606.4577	-927832.1816	-991192.3997	-999259.1491	-900111.2683	-668169.6666	-884013.557	-940489.8364	-943745.0053	-847613.7661	-788982.3763	-909642.5165	-948402.753	-908949.0573	-814668.2082	-799642.4259	-1026792.867	-1088594.865	-1091877.831
551	-612683.5934	-830460.1784	-912603.927	-905614.6081	-864918.6469	-744969.4207	-998132.7445	-1081352.153	-1102758.973	-1019999.86	-700720.6414	-946897.7887	-1028245.33	-1050732.038	-973283.1303	-652869.8496	-878912.6303	-950130.1711	-963826.2813	-889299.792	-711238.7262	-883099.4646	-944248.8503	-916361.4651	-858424.5671	-797322.2676	-1043182.252	-1120838.625	-1137298.935	-1047899.91	-754568.8943	-993494.2619	-1069227.316	-1086898.406	-1002174.501	-706298.7767	-925953.7869	-992157.3955	-1001724.852	-919720.6253	-809793.8589	-935738.7508	-975893.711	-927108.2523	-851930.4872	-849675.052	-1088231.683	-1160325.111	-1171838.867
552	-609170.858	-775795.4142	-816622.0062	-807096.8537	-713231.9555	-886919.8845	-1033831.735	-1018342.968	-950572.5512	-770022.3528	-899462.1178	-1068799.531	-1047234.299	-977707.0022	-792414.2927	-874430.3827	-1074458.196	-1063122.096	-1005536.685	-828031.7105	-686163.0861	-831453.5501	-864016.2628	-839255.3904	-714704.0473	-923116.2109	-1074285.356	-1064570.694	-1002415.962	-825524.7773	-930055.3997	-1102655.182	-1087044.666	-1023354.818	-842581.7602	-899795.954	-1101364.521	-1095124.829	-1042496.219	-869511.0797	-763155.3118	-887111.6892	-911410.4577	-871413.8647	-716176.1403	-959312.4748	-1114738.928	-1110798.407	-1054259.385
553	-647686.6333	-804730.2664	-854963.8324	-853473.8575	-763269.201	-906749.2158	-1072059.779	-1087004.548	-1044168.011	-884595.2352	-914652.1037	-1097466.429	-1106254.81	-1062455.197	-900077.291	-878695.088	-1079336.433	-1091799.492	-1055807.703	-900182.6262	-723429.5431	-852747.7315	-891036.9263	-874782.862	-757665.3675	-939801.9821	-1106683.477	-1124469.803	-1084732.973	-926656.4705	-943240.1899	-1126894.675	-1138655.183	-1098128.126	-937859.3726	-904189.3955	-1104563.732	-1119446.026	-1086109.77	-932576.9404	-799172.4612	-900765.1925	-927109.9557	-896091.8018	-752061.5357	-972854.686	-1141307.112	-1161935.057	-1125297.936
554	-539336.6857	-757861.5585	-808440.9358	-807165.3049	-717163.6032	-753742.3028	-918429.9471	-925383.5455	-883666.0931	-730787.6675	-745452.2447	-918058.1266	-919166.1275	-877257.3715	-722552.0992	-738640.0462	-922833.0944	-927330.2017	-891926.9204	-742853.4232	-711966.2012	-831858.212	-861304.7974	-842014.6343	-725219.2781	-806695.737	-973140.3509	-982941.753	-943698.6749	-791314.5106	-795132.5959	-969064.8733	-973224.3237	-933967.5352	-780160.5778	-782483.4398	-967253.2107	-974485.5419	-941347.1952	-793130.6873	-884595.7167	-905854.8655	-914168.5957	-876863.9011	-733274.9527	-859649.1229	-1027850.692	-1040499.968	-1003731.257
555	-626785.5327	-788717.3169	-823069.4068	-807951.0299	-711799.5915	-962228.8417	-1093445.295	-1063324.622	-981652.0385	-787479.3069	-986543.4416	-1144938.667	-1108109.732	-1023984.38	-823626.681	-954163.9664	-1151224.837	-1127590.553	-1058018.031	-866434.3977	-696153.8413	-840557.4631	-868464.9446	-838950.9227	-709961.4934	-989697.7208	-1126896.896	-1104221.416	-1029749.121	-840748.1783	-1007199.157	-1170413.612	-1141246.043	-1064573.076	-870450.6006	-969747.4507	-1169504.039	-1152457.713	-1089244.292	-903911.6056	-765522.1469	-892397.6133	-913860.4209	-869950.7529	-708123.3967	-1017166.537	-1160348.451	-1145118.195	-1077846.219
556	-590285.3252	-761941.2261	-809709.4405	-806181.0506	-714767.6612	-806177.5604	-969917.1947	-970115.9928	-917250.7509	-751305.9199	-806098.0781	-987167.1331	-981966.8438	-928090.8189	-758950.0029	-788944.2056	-992153.0188	-994002.3889	-949268.9322	-786858.3583	-675451.521	-821692.8108	-859246.6189	-839581.8249	-719788.7655	-851730.9992	-1017878.016	-1022059.264	-973110.7783	-809203.0431	-847345.8986	-1030008.138	-1028932.785	-979162.7592	-812702.2474	-824797.6187	-1028308.895	-1033655.511	-992375.3808	-832628.6355	-760617.715	-881444.3978	-908783.7353	-872982.5367	-724809.8707	-897284.3755	-1065838.784	-1074002.526	-1028970.815
557	-652693.6706	-770766.2845	-810211.3081	-803047.1588	-709916.3068	-910955.8799	-1055617.874	-1041763.946	-971847.0782	-785156.4739	-934477.163	-1106234.454	-1085029.412	-1012013.883	-820117.9422	-911887.2762	-1117564.655	-1105271.881	-1044349.546	-861108.6755	-721510.9579	-823559.9243	-854918.754	-833807.5976	-709365.6063	-943171.0214	-1092423.304	-1084528.087	-1020811.59	-838662.608	-960033.4789	-1135335.294	-1120291.739	-1053713.943	-867431.1625	-932359.2109	-1139627.417	-1132516.165	-1076969.057	-899372.4812	-790328.2487	-876353.5624	-899626.1375	-864567.9738	-708814.9066	-975386.1003	-1129228.642	-1127292.229	-1069776.11
558	-624857.1835	-850316.6858	-945152.4433	-826718.8725	-899565.4425	-757183.7289	-1019748.64	-1121957.63	-1169448.698	-1073384.951	-710888.9117	-967427.0082	-1069933.107	-1123312.793	-1028896.483	-658206.8875	-894813.1917	-987459.0519	-1031812.853	-940102.3479	-722154.4395	-903236.3242	-994510.9803	-1005581.709	-916193.3486	-808402.0946	-1062893.622	-1158031.436	-1198503.129	-1096764.306	-763681.5513	-1012132.968	-1107339.755	-1153572.398	-1053035.982	-710831.312	-940178.8578	-1026044.427	-1063926.471	-965872.1468	-819451.7042	-956155.9715	-1043869.464	-1184444.484	-932821.2545	-859620.3891	-1106038.523	-1194105.243	-1227557.542
559	-573157.862	-793250.2281	-885869.3769	-928405.0732	-776761.3951	-632701.3258	-890547.987	-980973.223	-1025576.207	-964152.0978	-576546.2798	-827397.2907	-917316.4534	-965770.4476	-911754.4556	-544535.2105	-775139.8607	-856210.6075	-896987.8949	-840894.8294	-680361.0187	-854665.403	-928159.1217	-956064.0107	-878255.5471	-698103.02	-948267.4546	-1032592.83	-1070489.373	-1000108.17	-644137.4371	-887359.1305	-971027.7403	-1012675.055	-949023.0339	-610350.3499	-834223.68	-909580.5043	-944128.7829	-878392.7213	-787564.1754	-916080.5779	-970448.8181	-983722.8857	-979749.699	-763504.6471	-1005986.86	-1084212.447	-1115402.54
560	-642157.8039	-826814.1298	-855531.8623	-911151.0238	-825268.0177	-842340.3158	-1059681.372	-1102570.984	-1097109.455	-970878.6162	-822867.0456	-1042316.897	-1079816.549	-1077587.507	-952989.6359	-777294.4534	-990812.1906	-1022078.599	-1024067.727	-906089.3511	-730518.1998	-875479.9528	-888477.7286	-924154.3052	-820956.2741	-883685.3182	-1097386.673	-1138902.83	-1132403.159	-1003954.603	-862912.5574	-1078484.243	-1114783.584	-1111464.468	-984599.2707	-815794.3186	-1025508.25	-1055809.393	-1056579.595	-936158.489	-818878.604	-924145.7717	-921423.5345	-937157.52	-816644.5389	-925030.2581	-1135091.91	-1175234.693	-1167696.846
561	-685950.3865	-681566.6898	-874423.2839	-866478.7616	-768472.417	-932463.8698	-1115074.366	-1104508.804	-1039491.621	-870772.2838	-938073.5947	-1135759.293	-1116532.934	-1049560.631	-877847.3136	-903544.7645	-1112436.424	-1099791.222	-1042365.255	-877875.737	-785408.4257	-904222.8541	-935282.9009	-895056.3607	-767874.6726	-965298.045	-1148036.771	-1142145.526	-1081836.23	-915185.3404	-966516.8171	-1163656.5	-1149392.128	-1087444.583	-918353.4797	-928092.4522	-1135691.799	-1127466.817	-1074545.283	-912636.4358	-884866.456	-1126879.018	-996142.4644	-923633.8972	-767276.9294	-998132.1398	-1180999.132	-1179782.248	-1124180.839
562	-573972.5787	-759841.4236	-813611.4565	-843082.9538	-758298.9774	-668148.8891	-883148.2529	-928455.6984	-920966.5659	-797006.8822	-637277.945	-854455.5272	-895636.8336	-890096.4	-767615.9061	-624434.0911	-837397.6024	-874782.6072	-871326.3824	-753553.3607	-675634.1407	-823186.7942	-861061.119	-871307.7961	-766538.3424	-729691.803	-941406.596	-985368.0152	-976788.4848	-850260.6423	-698052.9197	-911682.2793	-951599.8659	-945008.5951	-819940.7432	-680918.1794	-890352.568	-926595.8031	-922056.0722	-801589.5221	-777295.7058	-886532.1632	-908510.7198	-899532.5743	-774777.7106	-791234.6545	-999664.8767	-1042280.338	-1032610.398
563	-622894.5443	-847352.4061	-930778.9441	-965322.2211	-883747.1451	-784632.53	-1040700.222	-1123560.457	-1146764.829	-1068980.534	-741076.973	-986703.0304	-1068946.584	-1096335.516	-1021592.46	-682602.0204	-903638.3843	-976835.3271	-998174.6355	-923477.8978	-718711.52	-893283.4468	-957481.6868	-968060.514	-871105.3509	-831929.6263	-1080218.736	-1157316.629	-1175132.921	-1090086.218	-790368.489	-1028398.307	-1104791.792	-1126774.053	-1044103.243	-732851.8701	-947417.9086	-1015449.377	-1032077.877	-949318.9622	-814528.4914	-939214.4875	-984184.3582	-970798.7618	-858463.5479	-879226.6601	-1119737.187	-1191072.819	-1203501.013
564	-604280.7109	-851209.8765	-963259.7763	-1028440.763	-822752.1672	-685494.8102	-978739.4029	-1104162.494	-1191419.116	-1179007.165	-614406.9262	-893278.2472	-1020504.797	-1113733.821	-1113548.781	-551797.1827	-796784.8922	-909982.2895	-988713.7577	-981910.4688	-709722.3623	-904238.7425	-994659.1633	-1048553.158	-993063.9329	-744573.6453	-1026449.431	-1141953.614	-1218031.534	-1191710.351	-677795.4268	-945616.0508	-1062628.775	-1144424.285	-1129108.676	-616702.569	-852267.0397	-956171.9686	-1024491.455	-1002597.795	-815164.0138	-957267.6085	-1026058.513	-1068665.49	-1163375.699	-803652.4096	-1074159.397	-1179744.752	-1244643.951
565	-581375.2363	-786691.024	-863326.5692	-864820.5039	-806773.0682	-673801.9203	-911179.8405	-979820.7734	-989216.4547	-890531.4386	-632246.4523	-866314.213	-932476.7745	-943000.911	-848060.4071	-605983.3581	-826673.9968	-885802.4111	-891382.8857	-799633.2519	-684262.6335	-847017.9496	-904654.4725	-886085.4015	-809080.2607	-734519.6447	-966281.7014	-1031050.073	-1037027.07	-933246.7756	-693679.2485	-922050.9679	-984321.8204	-991542.9564	-891125.1176	-664812.5916	-880320.9322	-935940.7695	-938640.1734	-841265.1223	-787150.0306	-907344.8752	-945982.3134	-907350.2322	-811387.4532	-795237.3066	-1021383.491	-1082279.38	-1084837.667
566	-538603.7163	-752490.9535	-805649.9267	-806628.2818	-717476.7888	-726602.2577	-898394.8928	-911119.8729	-874199.4167	-725710.4614	-714071.6523	-892955.2177	-900190.9523	-863281.36	-713432.4428	-709148.9378	-897471.2398	-907258.9859	-876032.8336	-731519.9961	-702055.8354	-826181.7143	-858953.2183	-841802.0041	-726619.4689	-782508.8269	-955356.6466	-970323.0069	-935355.0782	-786886.2634	-767113.6704	-946643.9473	-956299.4212	-921507.6437	-772024.0538	-756346.4897	-944672.7505	-956618.0575	-927182.2492	-782989.8502	-865507.9545	-899872.475	-912256.4467	-876975.664	-735762.1487	-838415.3457	-1012318.338	-1029526.147	-996510.7397
567	-597776.2265	-767817.2623	-826024.8817	-831463.7833	-743926.4567	-757112.4564	-943692.6124	-972620.2274	-944821.6857	-801505.0388	-745030.1778	-942386.672	-966375.2171	-938566.2911	-794290.7728	-727629.9204	-933552.6278	-958551.9224	-935485.0454	-796572.3407	-688333.9827	-826341.3795	-870820.5104	-859715.8949	-747630.5793	-807878.5709	-993983.5863	-1023916.709	-997360.3047	-853661.2872	-793094.8185	-989444.5406	-1014524.653	-988095.4859	-843780.0707	-771370.6635	-975660.9776	-1001466.993	-979444.6821	-840453.6221	-778891.7436	-884865.4944	-915616.0753	-887967.9428	-751334.7028	-858644.6228	-1044274.498	-1075213.191	-1049898.924
568	-597092.4538	-745302.7139	-826197.3295	-831816.7168	-743270.0709	-744764.5365	-933228.6018	-962330.465	-932469.5299	-788897.4494	-728791.5521	-924704.6858	-950288.3863	-921149.7137	-776894.4529	-712244.5208	-912984.9479	-941144.1084	-917922.1317	-779278.8068	-690488.5593	-806284.8416	-872072.8854	-862272.2991	-749262.0657	-797572.3558	-985330.2547	-1015327.792	-986798.4089	-842773.5147	-779185.2978	-973996.0522	-1000495.972	-972802.8211	-828380.383	-758035.5183	-957234.8017	-986021.3362	-963914.3399	-825041.802	-783884.6628	-867266.9699	-917948.382	-892727.82	-755254.0604	-850380.1041	-1037431.845	-1068325.119	-1041127.279
569	-620344.3076	-805388.5368	-842120.8834	-889375.0072	-803843.5975	-786613.8144	-1003205.728	-1046868.842	-1040758.651	-915254.3893	-763494.254	-982217.1714	-1020894.641	-1017606.235	-893685.7447	-728392.0857	-941732.5176	-974956.3583	-975203.4351	-857290.755	-712959.9499	-858750.5716	-879706.7359	-907247.8987	-803547.1455	-834420.4376	-1047486.261	-1089784.695	-1082619.645	-954785.5547	-810171.438	-1025121.744	-1062578.617	-1058212.688	-931922.4895	-772645.379	-982269.8803	-1014471.99	-1013543.462	-893107.8185	-805575.5989	-912112.6031	-917292.5276	-925120.7245	-803250.7002	-882226.9983	-1091766.731	-1132700.561	-1124480.625
570	-604754.3289	-852091.8888	-964437.4799	-1029963.076	-823452.0408	-686298.2054	-980081.4731	-1106037.151	-1193942.863	-1182276.764	-614983.078	-894280.8035	-1022075.086	-1115985.483	-1116619.626	-551907.6932	-797114.2798	-910800.5706	-990109.6141	-984056.402	-710169.1744	-904993.1345	-995671.1408	-1049960.63	-994811.0521	-745280.8212	-1027639.181	-1143617.833	-1220276.785	-1194626.095	-678307.6238	-946502.5869	-1064022.731	-1146429.205	-1131849.164	-616799.2352	-852541.618	-956880.9834	-1025714.39	-1004487.91	-815584.0198	-957894.3802	-1026904.765	-1069958.12	-1166170.063	-804263.366	-1075196.826	-1181198.533	-1246610.708
571	-609863.5296	-828750.1071	-909959.5886	-941518.87	-859565.9507	-752591.9649	-1002419.53	-1079964.042	-1098480.939	-1014100.29	-709926.2753	-951174.0795	-1027693.971	-1049956.726	-968374.4307	-660963.4591	-880765.1547	-949219.1598	-966445.8314	-885431.6836	-707678.5533	-878498.676	-940954.9214	-949308.2209	-851069.3476	-803712.9602	-1046453.25	-1118887.251	-1132643.63	-1041660.933	-762680.9441	-996956.0696	-1068294.953	-1085794.985	-997042.9231	-713669.5084	-927456.9364	-991322.1025	-1004383.005	-916074.7494	-805493.5733	-928247.245	-971950.1842	-957097.5243	-842572.7369	-854833.893	-1090486.907	-1157810.474	-1166806.322
572	-584566.8431	-770817.836	-842949.7657	-855532.7681	-769654.8412	-705796.9455	-918672.3121	-962745.3072	-956082.0256	-834605.8154	-678513.2743	-894000.4765	-935024.9084	-929380.2522	-808902.5279	-658584.8914	-870547.7721	-909249.2744	-904425.4648	-787766.5769	-681968.9939	-831120.7115	-886172.4564	-879988.1456	-773250.6451	-762598.3875	-972378.4369	-1015188.303	-1007378.135	-883121.5092	-734433.6345	-946550.1779	-986336.0837	-979632.2291	-856369.3027	-710978.9945	-919567.4241	-957096.3317	-951224.6676	-831710.7273	-779371.1469	-891423.587	-929395.0889	-904443.4606	-776846.4491	-819399.7584	-1026084.499	-1067631.308	-1058674.245
573	-617226.6172	-782202.4856	-837302.5677	-840041.2438	-751464.4424	-815426.8163	-993718.0819	-1017196.497	-983537.5559	-833885.7963	-811132.8792	-1002822.201	-1020887.15	-986846.5549	-835516.4256	-786500.9397	-990365.468	-1010479.315	-982375.5204	-836949.9024	-702010.9371	-836632.0963	-878698.9712	-865587.584	-751541.1976	-859289.9307	-1037903.423	-1063102.864	-1031409.968	-882107.9564	-851607.3876	-1043009.698	-1062899.079	-1030975.878	-880443.3498	-823130.9353	-1025895.169	-1047444.143	-1021012.719	-876354.6424	-786795.2632	-891061.7039	-920095.3108	-891133.8603	-751617.954	-903152.9826	-1082088.701	-1109009.232	-1079282.38
574	-624239.6918	-846615.6302	-930792.4891	-920671.9514	-886380.5213	-771237.7628	-1030227.572	-1118827.982	-1144668.183	-1067787.415	-725994.8665	-976641.6595	-1063594.066	-1090496.23	-1019503.572	-670175.9289	-898194.2165	-973873.925	-990565.5639	-922396.2382	-721195.7603	-896417.3636	-958863.3675	-927536.5379	-876637.8402	-820503.0844	-1071566.697	-1153980.106	-1174309.869	-1090219.055	-777043.62	-1019864.401	-1100566.433	-1122094.662	-1043163.48	-721611.5711	-942797.1415	-1012907.282	-1025009.777	-948679.0119	-818151.8288	-946219.097	-986934.1834	-934401.0535	-866895.1591	-869768.3434	-1112905.743	-1189132.248	-1203951.521
575	-610658.786	-829885.3677	-911230.1517	-942971.5402	-861041.68	-754547.3357	-1004755.723	-1082624.643	-1101427.607	-1017449.52	-711827.3393	-953342.3394	-1030211.534	-1052787.13	-971622.2192	-662284.0166	-882161.0615	-950904.5185	-968382.176	-887753.5669	-708351.8729	-879400.9606	-941963.5164	-950452.6354	-852292.1042	-805434.9662	-1048513.889	-1121232.518	-1135236.666	-1044616.23	-764370.6588	-998874.9256	-1070522.281	-1088295.854	-999914.919	-714840.169	-928675.1141	-992794.5411	-1006073.167	-918103.5763	-806044.956	-928916.5536	-972696.811	-957933.6831	-843542.5209	-856322.5341	-1092271.992	-1159840.408	-1169045.724
576	-660681.2327	-770048.7013	-863643.2531	-860521.4737	-767517.5875	-924984.1905	-1087961.928	-1099231.295	-1047914.367	-883146.9211	-930811.4579	-1106533.942	-1114155.955	-1063076.075	-895526.7277	-891228.4998	-1079919.99	-1095132.641	-1055107.255	-895212.3154	-737870.6121	-819987.6705	-899378.1967	-884265.7773	-763837.9991	-957045.6377	-1121718.498	-1136137.036	-1088634.61	-925762.5892	-958478.9309	-1135380.954	-1146163.679	-1099033.693	-933956.1246	-915595.2023	-1104596.456	-1122331.701	-1085567.401	-928086.091	-815059.9872	-869926.6407	-935113.0842	-908010.0205	-760158.4106	-989107.0053	-1155475.005	-1173042.777	-1129354.837
577	-594972.9342	-837673.6527	-935382.979	-975043.4204	-869041.7566	-678913.4401	-961206.0579	-1071419.776	-1130331.378	-1073606.454	-613093.8914	-880110.7965	-991373.8408	-1053933.803	-1001043.37	-558807.3491	-792398.7637	-890954.7064	-939903.4018	-879542.9126	-701702.6826	-890483.5041	-966840.3778	-981178.318	-861192.3273	-738767.7114	-1010641.312	-1112267.668	-1162357.086	-1095329.953	-676873.7002	-933819.8461	-1036304.932	-1090000.706	-1026011.082	-623460.8695	-848588.2496	-939294.2844	-980447.4743	-909087.1304	-808432.424	-943293.3554	-998297.721	-987313.1669	-853342.9051	-798621.9201	-1060076.504	-1153115.559	-1194382.767
578	-585326.6062	-707637.5743	-817888.7931	-824671.5302	-735862.1981	-689834.3872	-893029.5977	-920467.6394	-892835.4983	-754689.7709	-666839.0858	-876579.5729	-898853.4488	-871360.5035	-733129.2185	-659335.9251	-870715.1099	-893626.0716	-869904.5397	-736489.2135	-691382.9316	-830264.7389	-875452.0584	-858892.9771	-745974.2724	-749515.4237	-950711.7167	-978840.3626	-952048.9537	-812760.1097	-724738.184	-932068.1969	-955149.0182	-928665.0202	-789475.9838	-712017.0958	-920725.987	-944298.8091	-921426.5855	-786995.8213	-797439.2539	-952891.9034	-933015.2641	-893114.3616	-756086.347	-809196.3917	-1008393.779	-1037213.086	-1011262.409
579	-546740.2683	-812108.9991	-836632.3782	-812589.6719	-714000.1753	-1027878.644	-1120800.152	-1069458.141	-979287.1591	-782071.5431	-1062421.533	-1171617.75	-1110830.698	-1018426.358	-814667.9825	-1036524.022	-1179008.277	-1130065.667	-1052470.014	-857330.1759	-812068.8878	-889195.4163	-885057.6429	-844162.3703	-711076.2221	-1051003.034	-1152770.105	-1110401.265	-1027975.73	-836043.3785	-1078146.338	-1195534.307	-1144179.486	-1059822.487	-862346.0316	-1046487.714	-1195334.068	-1154961.543	-1084424.572	-895561.3204	-1077397.507	-966281.8336	-933482.843	-875735.006	-708152.2677	-1074127.396	-1184739.996	-1151344.406	-1076664.301
580	-603320.5764	-702975.4684	-827998.53	-832147.6762	-741693.6955	-733222.418	-932736.5828	-953378.6592	-919061.1668	-775448.1371	-715342.3884	-922927.1871	-937779.8155	-903227.0045	-759008.3206	-703006.3831	-913940.7382	-930493.3961	-900744.6946	-761772.5499	-708196.9683	-843490.242	-886151.2628	-865359.8664	-749890.5946	-788102.5851	-985998.218	-1008043.283	-975258.0638	-831076.2229	-767974.0623	-973481.7972	-989884.3931	-957058.6535	-812522.403	-750656.6054	-959167.0832	-977053.6874	-948807.9188	-809463.4077	-813073.3561	-984005.0155	-944303.9372	-898571.9941	-758087.4943	-842982.6816	-1039259.799	-1062707.907	-1031454.961
581	-577641.6426	-752665.9803	-805081.5443	-805567.9292	-715795.8014	-752121.3507	-927127.0244	-937828.4963	-894942.1259	-738775.448	-743591.7511	-932515.0273	-938270.9102	-894873.2611	-736545.9825	-731712.0318	-937050.4942	-947727.4096	-911598.2123	-759293.1949	-668280.2312	-815158.0896	-856053.3881	-839800.3696	-723192.9354	-803939.2862	-980113.8437	-993598.2704	-953491.2397	-798275.799	-791972.6828	-981371.6406	-990027.44	-949576.6005	-792698.2009	-774586.9542	-979398.8551	-992502.3926	-958819.9615	-807936.1937	-758918.8184	-877650.2007	-907025.1699	-874032.7475	-730590.0701	-855757.1593	-1033100.608	-1049368.037	-1012040.361
582	-590301.9819	-834433.0645	-926635.1597	-959771.1885	-889364.6558	-680389.3438	-958650.3574	-1060959.669	-1108208.71	-1042641.685	-617698.2452	-878083.5715	-981730.2917	-1033868.743	-973259.499	-566611.4971	-791529.0033	-883726.6215	-925579.2483	-862110.2066	-697881.2224	-885401.4465	-955307.2673	-965793.3547	-881888.5023	-739995.4398	-1008099.529	-1102408.047	-1141834.468	-1066866.438	-681217.9387	-931874.8606	-1027366.902	-1071612.393	-1000600.818	-630934.1035	-847839.0755	-932852.673	-967835.0011	-893862.3296	-805460.4662	-936369.8218	-983979.3059	-971815.4385	-874412.3621	-799601.4735	-1057548.652	-1143856.413	-1175460.239
583	-583675.247	-769371.5519	-819576.6754	-852768.951	-767828.5841	-692936.101	-908268.6847	-953232.0755	-946031.4683	-821748.6022	-663687.031	-881187.954	-921845.3659	-916776.1391	-793994.3451	-646185.9204	-859228.2974	-895742.6338	-893061.2757	-775259.0324	-683444.0705	-830628.0422	-864962.4667	-878827.7851	-774281.9428	-751604.8786	-963602.3567	-1007215.818	-998932.2491	-872131.0917	-721512.2302	-935417.9804	-974820.6953	-968695.0478	-843371.4361	-700110.8774	-909585.0446	-944982.7277	-941198.5932	-820738.5098	-783212.8978	-891884.5305	-910348.1964	-904886.5548	-780735.3054	-810273.5936	-1018935.966	-1061199.569	-1051833.022
584	-542770.043	-783018.4124	-821514.511	-809680.8154	-715696.5866	-880871.0266	-1012277.65	-992197.0856	-928009.6633	-754570.1898	-892444.4345	-1035644.548	-1008049.171	-942723.4567	-765270.1665	-876781.5619	-1041632.462	-1021347.292	-966377.6062	-795941.1802	-758388.0901	-858447.9212	-872320.0058	-843010.6312	-718660.5393	-919991.4595	-1056442.336	-1042050.169	-982781.543	-812057.196	-926378.1496	-1074088.417	-1052503.53	-992331.8491	-818273.4811	-904913.4914	-1073024.041	-1058179.968	-1007698.282	-840632.1445	-974006.1372	-933877.4301	-923125.4367	-876340.3843	-721624.4912	-959111.8537	-1100606.96	-1091903.265	-1037553.423
585	-571842.4176	-758175.2969	-829350.4104	-842356.011	-756916.8136	-670611.8232	-883679.7955	-928421.3293	-921250.393	-799480.2138	-640741.4979	-856321.7953	-897928.2153	-891822.1849	-771149.4937	-627426.7767	-839561.2547	-878830.8242	-873551.0412	-756640.4447	-672281.696	-821410.3606	-875779.1601	-870007.388	-763536.4833	-731588.2419	-941565.3112	-985026.7773	-976715.5533	-852167.0561	-700943.7627	-913157.0636	-953509.242	-946351.9086	-822896.9452	-683504.9192	-892266.2623	-930345.0399	-924028.3267	-804266.6138	-772720.9759	-884645.4242	-922207.8504	-897658.7024	-770156.153	-792564.5918	-999450.7644	-1041632.232	-1032180.714
586	-643926.2728	-828551.1505	-856619.1203	-912916.4541	-827004.9434	-846858.1878	-1064259.979	-1107086.882	-1101677.94	-975388.1966	-827680.5306	-1047189.316	-1084593.48	-1082450.323	-957797.535	-781259.0777	-994791.1894	-1025898.904	-1028029.265	-910045.5624	-731941.6863	-876836.2412	-889188.8126	-925524.9454	-822367.6711	-887679.3322	-1101432.211	-1142884.947	-1136439.22	-1007940.848	-867188.3979	-1082810.461	-1119015.958	-1115781.709	-988869.8951	-819292.4997	-1029013.681	-1059160.709	-1060068.63	-939648.7032	-819957.1083	-925121.3276	-921758.4444	-938133.3699	-817730.4074	-928500.4141	-1138604.379	-1178683.03	-1171200.482
587	-596985.9977	-847985.0408	-943033.1649	-978422.4355	-909655.1703	-693947.6329	-979920.0064	-1088863.174	-1142784.693	-1084027.668	-628251.1532	-893950.0755	-1004794.82	-1064045.811	-1010672.331	-570328.0237	-796710.4376	-895023.6584	-942660.9694	-885657.5153	-704347.5947	-896457.0297	-968457.3348	-980738.1105	-899432.0732	-751919.8611	-1026890.599	-1127036.985	-1172336.187	-1103387.164	-690658.689	-945868.8389	-1047741.041	-1098279.907	-1033593.798	-634336.951	-852152.7685	-942573.2323	-982640.3276	-914218.7175	-811709.1955	-944929.0111	-993881.4348	-983053.7006	-889208.991	-809892.0268	-1073861.145	-1165210.782	-1201887.696
588	-589858.8699	-706463.298	-820435.2013	-826554.5979	-737331.017	-700762.8257	-903030.8662	-928757.1618	-899441.1359	-759918.3218	-679055.9426	-888253.4618	-908658.0976	-879386.9359	-739647.564	-670335.5005	-881602.643	-902912.0954	-877672.4593	-742857.4995	-695617.9974	-833595.9363	-878146.9398	-860521.8365	-746960.7031	-759234.6346	-959599.5679	-986195.9009	-957894.7902	-817373.5137	-735628.2988	-942499.3222	-963898.0534	-935816.7178	-795280.8422	-721749.492	-930408.4074	-952549.0031	-928323.3082	-792654.8852	-801377.1216	-960728.5746	-935858.619	-894489.0126	-756590.3896	-817706.3744	-1016168.214	-1043634.64	-1016348.445
589	-583328.5996	-820294.3916	-909527.2466	-940312.4856	-868195.7178	-666244.0848	-936459.8958	-1031848.156	-1072135.852	-999464.0055	-606688.4772	-861530.1696	-957667.2468	-1002385.24	-934226.9779	-562734.0734	-786123.2526	-871940.5096	-907758.0198	-837543.4802	-691134.9057	-873867.2413	-941587.9028	-950201.6057	-863585.4294	-727554.7826	-988494.9502	-1076712.865	-1110012.258	-1028764.646	-671368.4763	-917275.0503	-1006110.719	-1043790.38	-966179.4958	-627383.9389	-843338.6328	-922711.2881	-952388.7176	-872624.6662	-798941.2148	-927440.0851	-973648.4908	-960090.6458	-858975.1526	-788865.4181	-1040529.954	-1121577.563	-1147888.676
590	-641765.8119	-693014.5895	-849598.611	-848120.9268	-754153.0519	-825923.6419	-1017573.024	-1023695.098	-975093.9372	-819799.6763	-818972.7085	-1021951.745	-1020948.417	-971311.7639	-814300.6305	-796311.0305	-1006294.979	-1009262.726	-966636.602	-815791.9693	-744121.2026	-871747.3513	-909010.778	-879176.7772	-758258.0605	-870546.4533	-1061390.021	-1070437.137	-1024845.769	-870209.7368	-860350.2029	-1061964.528	-1064098.68	-1017723.415	-861762.5097	-833212.3186	-1041298.874	-1047036.52	-1007309.839	-857466.802	-846476.587	-1050480.113	-968422.8887	-910232.5651	-762363.0699	-915169.1896	-1105206.968	-1117179.176	-1074597.602
591	-602197.5992	-771087.2446	-828588.4731	-833413.5718	-745639.9567	-770368.2065	-955064.1704	-982753.0984	-953622.3979	-808865.6826	-760056.3375	-956124.5965	-978766.617	-949541.1369	-803661.9972	-741012.2077	-946467.0594	-970355.8166	-946143.9709	-805750.781	-691442.9646	-828680.6175	-872611.4056	-861050.62	-748519.5229	-819565.163	-1003967.24	-1032824.325	-1005100.316	-860127.6522	-806395.6246	-1001620.724	-1025520.903	-997842.858	-852114.1974	-783136.5686	-987079.9812	-1011918.306	-988893.7356	-848614.4757	-780688.3351	-886273.988	-916634.2743	-888687.6045	-751399.0902	-868762.0569	-1052870.247	-1082895.551	-1056578.235
592	-585167.6325	-818799.7933	-911765.5818	-947320.8074	-844850.735	-660793.0977	-931992.625	-1031946.517	-1079938.774	-1012564.005	-599548.5096	-858298.9636	-958584.8085	-1009830.076	-945894.7798	-555035.8805	-785242.2314	-874489.9045	-914459.215	-844841.6341	-692329.3405	-874692.3897	-947170.8688	-958456.3222	-840781.159	-722819.6342	-984786.2862	-1077325.41	-1117739.829	-1041279.521	-664792.2247	-914556.8234	-1007272.857	-1050920.064	-977230.777	-620060.6756	-842626.1796	-925091.2105	-958362.2387	-879063.3086	-799491.0428	-930584.986	-982576.0991	-969591.7861	-836711.5888	-784846.1082	-1037579.885	-1122704.303	-1155540.861
593	-635376.54	-821300.5534	-897253.1302	-908148.6628	-820518.8526	-846294.0859	-1058400.361	-1099803.826	-1095167.651	-974865.2847	-829339.141	-1044454.606	-1083155.111	-1079352.76	-959653.5551	-783001.8528	-994279.5312	-1030712.694	-1027709.624	-912055.8295	-720651.186	-869894.9561	-927673.7593	-919842.1467	-812040.1071	-886424.4959	-1095417.828	-1135625.803	-1129816.394	-1006725.233	-868161.4975	-1079891.68	-1117416.412	-1112523.336	-990027.2295	-820685.2781	-1028583.25	-1063916.48	-1059821.934	-941297.3711	-805925.8364	-918489.3588	-958094.3343	-931535.5681	-803561.3616	-926554.8264	-1132435.233	-1171447.798	-1164465.137
594	-578686.8193	-764975.6523	-836665.4322	-849443.7195	-763768.5318	-689537.7157	-902502.0864	-946884.0168	-939986.1453	-818374.0905	-661058.7381	-876588.9601	-917882.3317	-912024.4721	-791456.6525	-644186.563	-856228.7397	-895192.7488	-890158.2315	-773383.0278	-677492.4427	-826633.5074	-881369.6596	-875375.9851	-768761.6799	-748268.4364	-958139.5297	-1001250.504	-993208.7953	-868817.2939	-718957.7889	-931119.0444	-971166.6278	-964253.2182	-840901.5505	-698283.0801	-906951.4139	-944734.4193	-938657.0957	-819028.6584	-776298.068	-888291.3624	-926073.8283	-901308.1882	-773754.8281	-806999.087	-1013776.91	-1055616.998	-1046431.445
595	-641661.4306	-693041.6339	-849539.9655	-848077.5584	-754119.2239	-825671.9522	-1017342.687	-1023504.184	-974941.8047	-819679.2591	-818691.3457	-1021682.887	-1020722.609	-971126.9095	-814150.5084	-796057.7025	-1006044.231	-1009048.862	-966457.7014	-815645.3032	-744023.666	-871670.6314	-908948.7129	-879139.2634	-758235.3423	-870322.6131	-1061185.327	-1070267.734	-1024711.136	-870103.4869	-860099.3959	-1061724.292	-1063897.184	-1017558.707	-861628.8197	-832988.1747	-1041075.881	-1046846.512	-1007151.003	-857336.4698	-846385.8952	-1050299.629	-968357.4043	-910200.9059	-762351.4614	-914973.1987	-1105027.917	-1117031.283	-1074480.467
596	-587557.2907	-741592.0431	-820582.2981	-827512.4269	-739634.146	-717740.5267	-910026.2772	-941802.1303	-915158.53	-774764.7032	-698498.5857	-897439.3155	-925716.3783	-899867.7986	-759105.4955	-685405.8009	-887952.971	-918053.4658	-897351.1671	-761894.5304	-683383.6014	-804230.0969	-867978.443	-858974.3682	-747076.3986	-773659.2729	-964878.7827	-997212.3973	-971528.0294	-830329.2695	-752300.1452	-949796.3211	-978653.0402	-953874.4509	-812549.258	-734409.3801	-935137.8622	-965581.542	-945672.4144	-809590.2693	-779209.9104	-866868.1512	-915374.528	-890436.2479	-754518.6511	-829577.9493	-1019731.226	-1052622.664	-1027897.522
597	-597293.2011	-783462.2951	-856551.1862	-868711.5264	-782394.8034	-740987.4113	-953670.1428	-997074.4977	-990918.9479	-869736.7515	-716290.787	-931684.8799	-972127.2352	-966944.0233	-846661.2955	-689747.738	-901538.9953	-939672.3442	-935304.5772	-818897.4361	-691657.7631	-840832.5371	-896567.3312	-889970.419	-782966.2823	-793613.2425	-1003196.242	-1045354.41	-1038045.374	-914080.6632	-767928.5923	-979948.3636	-1019167.911	-1012917.604	-889846.7435	-738457.2422	-946872.732	-983851.6862	-978425.1386	-859159.0087	-786022.3277	-898202.7792	-936583.419	-911229.2491	-783537.7612	-846239.0005	-1052722.279	-1093634.333	-1085171.801
598	-593579.8343	-831281.7829	-936650.8654	-994045.7895	-806939.2968	-667342.9834	-948416.8106	-1061806.693	-1134397.842	-1105134.186	-601389.4127	-870626.5938	-985025.8559	-1062860.014	-1044166.438	-549300.3204	-789342.7454	-891494.132	-957175.9271	-933425.4808	-699627.1389	-887194.0886	-971794.6517	-1016752.889	-953589.707	-728595.7884	-999568.3548	-1104352.421	-1167302.551	-1125832.343	-666222.9003	-925585.7471	-1031133.863	-1099125.339	-1067190.365	-614518.5044	-846063.245	-940152.564	-996860.5966	-959892.7335	-805674.4434	-943106.3942	-1006938.397	-1039459.927	-1100240.117	-789848.5238	-1050719.837	-1146898.164	-1200207.261
599	-622779.8509	-755299.1318	-841324.0284	-843412.3238	-753065.1259	-817566.2776	-995734.8561	-1017633.084	-979104.7605	-826970.5757	-810399.7483	-998156.6438	-1016484.52	-978482.4518	-824817.2847	-784547.0972	-980420.2219	-1003349.495	-973339.5939	-826111.4418	-709629.0685	-811820.2523	-883103.1707	-871156.8102	-755150.1767	-861993.3683	-1040425.808	-1064130.035	-1027936.279	-876297.8778	-851612.9624	-1039189.285	-1059340.068	-1023795.191	-871028.8824	-821683.5115	-1016763.187	-1041085.43	-1013057.452	-866667.6928	-796478.2831	-868341.3736	-924882.2551	-898901.2355	-757235.2275	-906420.3845	-1085116.697	-1110626.986	-1076767.786
600	-616942.9482	-781992.6882	-837138.0913	-839916.1481	-751354.5067	-814576.3462	-992988.4989	-1016546.386	-982972.9148	-833413.5479	-810168.8222	-1001940.796	-1020092.135	-986142.4244	-834915.1812	-785642.3512	-989536.8965	-1009721.994	-981691.659	-836361.0267	-701811.4693	-836482.0141	-878584.07	-865501.95	-751484.1643	-858540.1356	-1037262.886	-1062531.365	-1030913.38	-881693.0836	-850754.0268	-1042228.492	-1062193.575	-1030350.501	-879908.6441	-822376.0516	-1025162.542	-1046773.602	-1020406.481	-875831.0537	-786679.9965	-890971.337	-920029.9846	-891087.6878	-751613.823	-902503.8625	-1081537.21	-1108516.343	-1078853.845
601	-619790.0534	-804844.1388	-841780.1269	-888821.7054	-803299.2294	-785197.8725	-1001770.751	-1045453.519	-1039326.846	-913841.0461	-761985.6644	-980690.1113	-1019397.508	-1016082.184	-892178.9058	-727149.5366	-940485.4634	-973759.0401	-973961.8535	-856050.8426	-712513.8164	-858325.4986	-879483.8757	-906818.3277	-803104.801	-833168.6775	-1046218.352	-1088536.663	-1081354.707	-953536.2297	-808831.351	-1023765.869	-1061252.153	-1056859.626	-930584.0373	-771549.0175	-981171.2465	-1013421.657	-1012449.967	-892013.9538	-805237.5859	-911806.8551	-917187.5638	-924814.8843	-802910.3793	-881139.4201	-1090665.891	-1131619.821	-1123382.554
602	-628358.0762	-790435.1493	-843756.7877	-844950.1246	-755778.4318	-848800.1259	-1022347.659	-1042707.497	-1005694.649	-852417.3046	-848963.4569	-1037409.456	-1052084.33	-1014477.351	-859109.8678	-820192.8255	-1022879.458	-1040197.363	-1009210.94	-860057.9819	-709838.2585	-842521.4738	-883207.8146	-868947.9519	-753779.2446	-888712.6532	-1063038.746	-1085529.102	-1050896.591	-898387.9859	-885094.1324	-1073665.039	-1090583.764	-1055516.328	-901425.7453	-852753.3401	-1054644.198	-1073756.867	-1044802.107	-896900.7972	-791318.4477	-894607.7948	-922658.7773	-892945.715	-751780.0587	-928625.1181	-1103729.77	-1128350.708	-1096098.532
603	-608002.4758	-862753.7311	-966766.3946	-1011881.954	-901187.4192	-702992.2254	-1000025.632	-1123872.877	-1197294.389	-1154721.257	-631093.3493	-909094.9309	-1034944.765	-1112539.991	-1074326.259	-563818.9754	-801908.5512	-912833.566	-973714.3033	-925654.8799	-714158.2248	-911467.1502	-992977.7362	-1011371.901	-888315.2221	-759959.9337	-1044998.148	-1158699.854	-1221645.665	-1167153.582	-692927.8811	-959417.055	-1074883.514	-1141932.087	-1090831.629	-627979.1361	-856510.8044	-958167.7007	-1009794.913	-948983.5706	-820313.9654	-960180.5693	-1019189.024	-1010861.802	-875443.0335	-816927.5796	-1089970.601	-1193526.832	-1245996.908
604	-544974.7106	-799172.4256	-829909.4681	-811296.1045	-714754.5688	-962504.4091	-1072540.234	-1035100.177	-956484.075	-769841.7011	-986832.7782	-1111150.516	-1065123.79	-984761.3048	-792700.7914	-965486.6072	-1117917.301	-1081718.645	-1014184.751	-830030.5115	-788197.0562	-875522.0163	-879393.2203	-843650.1923	-714448.9652	-992742.2335	-1109933.181	-1080005.557	-1007877.891	-825376.7317	-1010655.079	-1141527.363	-1103411.222	-1029809.425	-842746.9841	-983529.7076	-1140942.842	-1111922.811	-1050304.418	-871134.3355	-1031419.402	-951871.607	-928876.9081	-876004.2175	-714143.3607	-1022980.025	-1147326.065	-1124910.952	-1059271.707
605	-594021.0946	-780211.2458	-853054.0901	-865323.102	-779119.1991	-731939.5004	-944671.7608	-988248.0315	-981961.9374	-860704.1465	-706577.7139	-921995.7463	-962587.7608	-957285.9058	-836953.0419	-681735.3786	-893570.7624	-931850.1907	-927365.1694	-810893.3011	-689166.6588	-838335.5048	-893894.6783	-887403.8511	-780468.2699	-785638.9336	-995272.5971	-1037598.325	-1030160.442	-906120.6757	-759316.6178	-971361.2704	-1010726.435	-1004359.516	-881239.2729	-731392.2395	-939852.1943	-976972.5484	-971431.5558	-852101.7107	-784312.2256	-896459.7637	-934735.209	-909484.5376	-781817.3408	-839338.2941	-1045873.371	-1086948.629	-1078358.946
606	-605278.1686	-750782.1279	-801802.4901	-803214.707	-713682.4806	-773125.9227	-945408.4709	-955809.0151	-910418.5237	-749377.6169	-772209.5874	-961625.6638	-966261.0815	-919493.9121	-755888.6213	-761150.5538	-969616.4631	-978643.0294	-939463.6308	-782486.9742	-690347.9256	-811222.5324	-850988.448	-836507.4669	-719577.0171	-821792.7893	-995594.939	-1009035.433	-966913.5721	-807485.525	-816700.5003	-1006897.737	-1014706.467	-971387.4063	-810036.8195	-800235.0041	-1008305.496	-1019940.309	-983581.325	-828851.6593	-775417.6848	-871662.9358	-900174.3433	-869800.1644	-725471.554	-870459.5934	-1045781.327	-1062261.851	-1023408.625
607	-576998.5848	-781910.7208	-862751.6143	-814431.4862	-804321.7966	-656563.6774	-893274.0731	-966159.0686	-983974.2102	-873868.3414	-614913.6922	-849954.2834	-921187.7686	-942414.787	-833820.1564	-593348.4918	-817291.1486	-882618.1518	-900033.7176	-794614.5578	-680692.7905	-844854.1772	-915562.1316	-918376.4282	-820377.1822	-719449.5724	-950726.2836	-1019573.791	-1033486.443	-919239.4599	-678299.6809	-907753.2529	-974857.2199	-992170.5859	-879224.1786	-653543.4848	-872282.6559	-933754.5601	-947587.2478	-837676.002	-784387.0005	-907797.6377	-968372.5906	-1022321.308	-836432.5677	-782335.4008	-1008178.423	-1072988.514	-1082998.668
608	-595887.2212	-766420.1817	-824929.6025	-830630.7476	-743194.374	-751449.0156	-938834.1816	-968291.0183	-941061.6335	-798360.2473	-738610.3399	-936517.2251	-961081.0649	-933877.3532	-790286.9727	-721912.4174	-928035.0134	-953508.7784	-930931.0826	-792650.9065	-687005.6886	-825341.9539	-870055.361	-859145.6414	-747250.7834	-802885.5436	-989718.1294	-1020110.983	-994053.4305	-850898.571	-787412.1278	-984242.3383	-1009826.57	-983930.9789	-840219.3644	-766343.7502	-970782.2758	-997001.7314	-975407.6299	-836966.9457	-778124.1605	-884263.7238	-915181.0558	-887660.4716	-751307.1937	-854322.009	-1040602.015	-1071930.949	-1047045.228
609	-580649.4626	-810102.9367	-900882.9578	-934546.5473	-833703.7915	-652443.4531	-918531.4122	-1013757.694	-1056718.443	-984436.349	-593306.954	-848248.3228	-943476.0009	-989507.587	-920482.9461	-553298.0312	-781944.5839	-866903.1139	-902734.8273	-828851.6854	-688010.2127	-867416.0264	-938107.3861	-947986.2888	-831375.9281	-715470.9443	-972872.5885	-1061224.421	-1097180.712	-1016373.706	-659225.2202	-905680.6448	-993895.2113	-1032912.155	-954753.3753	-618493.9055	-839878.9265	-918546.598	-948185.617	-865228.6781	-795370.9575	-924729.1161	-975331.7571	-961425.9783	-829048.0702	-778498.373	-1027213.702	-1108691.148	-1137642.96
610	-582042.8088	-739446.0465	-817334.9505	-825023.1219	-737531.3774	-702111.6996	-896607.6497	-929929.9546	-905147.0393	-766591.2955	-680979.2191	-881670.902	-911505.6202	-887559.8038	-748817.587	-669884.1328	-873476.1985	-904699.4276	-885454.3371	-751840.6616	-679274.5828	-803041.774	-865610.4993	-857067.072	-745812.3592	-759829.5917	-953051.059	-986735.6999	-962696.693	-823132.3747	-736751.6236	-935800.8624	-966020.5921	-942927.5845	-803393.625	-720745.648	-922358.5133	-953760.5719	-935122.5403	-800654.1663	-776506.3553	-866637.5019	-913885.988	-889110.9603	-754093.341	-817547.4148	-1009494.406	-1043541.445	-1020246.34
611	-540713.8298	-767952.1519	-813684.84	-808174.2941	-716575.1724	-804734.54	-956072.9296	-952182.9327	-901452.6152	-740327.0067	-804411.8598	-965222.8783	-954817.7497	-903516.2849	-739686.6205	-794049.5928	-970484.3676	-965041.1266	-921789.6212	-764147.3009	-730586.3517	-842523.5339	-865723.076	-842414.1357	-722588.5212	-852139.4588	-1006553.371	-1006650.56	-959375.0919	-799634.5496	-847776.123	-1011190.565	-1005023.779	-957377.8775	-795447.935	-831591.0062	-1009678.644	-1008055.973	-967961.0892	-812183.8604	-920458.8736	-917094.9159	-917761.2485	-876653.9148	-728601.8696	-899544.3331	-1057033.75	-1061118.197	-1017297.569
612	-609726.2172	-873816.0921	-974288.9541	-1013973.067	-948330.3648	-719790.7169	-1020461.502	-1142049.282	-1208689.029	-1162912.359	-648365.7624	-924192.7848	-1048757.485	-1121565.494	-1081983.908	-577411.9934	-806586.6278	-916556.6315	-975219.9707	-930540.3963	-716672.9702	-917529.7745	-993522.3186	-1009223.901	-932871.3939	-774648.6743	-1062707.744	-1173981.531	-1230474.681	-1172998.319	-708653.4449	-972542.3783	-1086575.63	-1149110.125	-1096480.813	-640823.0255	-860374.9807	-961101.3245	-1010860.355	-953019.4718	-823619.7276	-961243.4479	-1012755.612	-1004474.645	-917412.4408	-829506.5692	-1104953.941	-1205913.761	-1252260.35
613	-630516.5378	-695929.194	-843278.316	-843447.0713	-750507.38	-798798.7858	-992749.4437	-1003120.145	-958698.4597	-806822.1873	-788649.9425	-992976.6488	-996612.8552	-951389.8123	-798121.8156	-769009.6096	-979271.6519	-986214.414	-947356.2902	-799985.6087	-733609.5864	-863479.1754	-902321.966	-875133.8779	-755809.6968	-846422.9525	-1039329.99	-1052180.374	-1010336.151	-858759.0689	-833320.4679	-1036074.025	-1042383.197	-999972.5931	-847354.6006	-809056.0913	-1017266.689	-1026559.183	-990191.8755	-843420.7613	-836702.6294	-1031029.157	-961365.5592	-906820.6219	-761112.0144	-894047.0452	-1085910.486	-1101240.602	-1061973.842
614	-546485.3065	-810240.846	-835661.5318	-812402.8696	-714109.1162	-1018438.04	-1113831.003	-1064496.554	-975994.1967	-780305.4482	-1051505.864	-1162885.759	-1104230.226	-1013564.833	-811495.7302	-1026265.606	-1170186.212	-1123083.94	-1046941.291	-853387.8684	-808621.589	-887220.8592	-884239.6513	-844088.4074	-711563.2753	-1042589.671	-1146584.083	-1106011.862	-1025073.428	-834503.0225	-1068400.017	-1187735.237	-1138292.197	-1055488.342	-859515.7597	-1037396.033	-1187479.505	-1148746.378	-1079497.327	-892033.8527	-1070757.871	-964200.8724	-932817.7062	-875773.8825	-709017.4333	-1066741.273	-1179337.101	-1147527.186	-1074152.66
615	-644431.7582	-767284.1458	-808746.1139	-803076.3532	-710572.5436	-886939.7042	-1036414.441	-1026786.732	-961143.462	-778922.1883	-906202.8553	-1081037.101	-1064334.628	-995892.7438	-808926.3066	-885622.1616	-1091785.428	-1083207.441	-1026073.703	-847409.2401	-716080.9565	-821410.1959	-854233.918	-834278.0362	-711144.8932	-922021.4759	-1075551.449	-1071373.873	-1011420.132	-833230.1583	-935058.4294	-1112955.696	-1101894.037	-1039368.958	-857430.4874	-909337.2334	-1116745.234	-1112900.389	-1060696.716	-887084.5832	-787730.1581	-875536.2444	-899721.6596	-865479.6566	-711717.2435	-957103.1851	-1114688.368	-1115961.013	-1061696.809
616	-615485.2256	-699823.6969	-834833.1197	-837201.8523	-745636.0227	-762554.4758	-959580.1053	-975627.8352	-936790.7759	-789481.6294	-748132.5763	-954260.0427	-964095.6085	-924770.0437	-776503.6369	-732529.3732	-943163.0053	-955417.1937	-921593.8826	-778865.1046	-719563.9349	-852431.2152	-893384.3563	-869731.7442	-752538.1864	-814189.0618	-1009853.315	-1027785.634	-990948.3577	-843458.6537	-797203.2589	-1001479.06	-1013366.907	-976253.8941	-828102.7114	-776778.4715	-985154.8139	-999197.3055	-967318.8039	-824652.4018	-823642.6395	-1005038.734	-951935.5353	-902261.5737	-759440.3506	-865823.5757	-1060126.472	-1079943.434	-1045105.939
617	-604304.2198	-702720.6136	-828551.1804	-832556.361	-742012.4752	-735594.2318	-934907.1716	-955177.7454	-920494.7973	-776582.8966	-717993.8294	-925460.7871	-939907.7317	-904968.992	-760423.006	-705393.6359	-916303.6742	-932508.7545	-902430.5767	-763154.6677	-709116.1104	-844213.2163	-886736.1366	-865713.38	-750104.681	-790211.9586	-987927.1603	-1009639.665	-976526.7936	-832077.4762	-770337.5586	-975745.6785	-991783.2081	-958610.7961	-813782.2393	-752768.8405	-961268.472	-978844.2382	-950304.7239	-810691.602	-813927.9969	-985705.8189	-944921.0344	-898870.3365	-758196.8874	-844829.6147	-1040947.095	-1064101.585	-1032558.79
618	-619295.5209	-839703.6681	-923010.6794	-914229.8049	-877198.2549	-759999.0932	-1016496.094	-1102794.292	-1126737.711	-1047341.947	-715181.5208	-963916.0168	-1048470.433	-1073483.485	-999728.5796	-662771.6813	-889944.7664	-963715.3773	-979125.4067	-908236.2268	-716935.7345	-890719.4225	-952610.6802	-922755.3854	-868845.4581	-810585.3842	-1059422.672	-1139800.827	-1158475.08	-1072113.197	-767428.0145	-1008582.179	-1087158.279	-1107036.266	-1025626.721	-715060.1323	-935590.8665	-1004029.633	-1015047.535	-936289.4314	-814575.9479	-941735.1769	-982210.6184	-931280.8953	-860492.6613	-861171.6127	-1102349.172	-1176807.378	-1190212.416
619	-539231.3723	-757089.9071	-808039.9221	-807088.1451	-717208.6018	-749842.8066	-915551.2997	-923334.1334	-882305.916	-730058.1718	-740943.4644	-914451.3272	-916439.7641	-875249.2907	-721241.782	-734402.7479	-919189.0895	-924446.3587	-889643.2495	-741225.0303	-710542.2745	-831042.6097	-860966.9213	-841984.0835	-725420.4583	-803220.5488	-970585.1787	-981128.6848	-942499.8625	-790678.2577	-791106.8217	-965843.4226	-970792.5446	-932177.2913	-778991.5177	-778728.0688	-964008.8381	-971918.3321	-939311.9681	-791673.6464	-881853.1768	-904995.3124	-913893.8571	-876879.9593	-733632.3143	-856598.2424	-1025618.995	-1038923.243	-1002693.809
620	-618280.2307	-699099.5316	-836403.466	-838363.1227	-746541.8297	-769293.9426	-965747.7949	-980739.9069	-940864.4114	-792706.0283	-755666.5986	-961459.2218	-970142.0446	-929719.8702	-780523.4402	-739312.7094	-949877.2461	-961143.7986	-926384.2866	-782792.3675	-722175.6608	-854485.5338	-895046.2647	-870736.2467	-753146.509	-820182.8091	-1015334.371	-1032321.727	-994553.4309	-846303.6972	-803919.0918	-1007911.839	-1018762.356	-980664.2797	-831682.5138	-782780.35	-991125.8728	-1004285.124	-971571.9489	-828142.294	-826071.086	-1009871.536	-953689.0059	-903109.3082	-759751.189	-871071.6031	-1064920.894	-1083903.546	-1048242.45
621	-576957.4999	-800326.2408	-895317.5959	-940617.9461	-782376.1857	-639146.6266	-901314.8498	-996012.8044	-1045823.164	-990382.7122	-581168.5028	-835440.3775	-929914.2185	-983834.5792	-936390.5474	-545421.7895	-777782.3978	-862775.3317	-908186.2612	-858110.7458	-683945.6029	-860717.5719	-936277.7897	-967355.5627	-892271.9468	-703776.3936	-957812.3135	-1045944.159	-1088502.081	-1023499.952	-648246.578	-894471.4357	-982210.8669	-1028759.68	-971008.8176	-611125.8616	-836426.5064	-915268.6305	-953939.8723	-893556.317	-790933.706	-921108.9029	-977237.9364	-994093.1167	-1002167.708	-768406.0929	-1014309.715	-1095875.524	-1131180.998
[truncated: 20,378 more rows]
[truncated: 54 more columns]
