# Supplementary material for: Particle Swarm Optimization of Support Vector Machine Inversion Model for Overhead Upright Piers Damage-Inducing Factor
Source: Hindawi journal article supplement (doi:10.1155/2023/8871629), 2023-12-13
Supplement: f2 [file 8871629.f2.zip]

Archive with 2 entries (2 files):
- dg_plxg1.py
- odbtiqu-1.py
