# Supplementary material for: Particle Swarm Optimization of Support Vector Machine Inversion Model for Overhead Upright Piers Damage-Inducing Factor
Source: Hindawi journal article supplement (doi:10.1155/2023/8871629), 2023-12-13
Supplement: f2 [file 8871629.f2.zip › dg_plxg1.py]

#! /user/bin/python
# _*_ coding:utf-8 _*_
#导入库
import os
import random

#目标路径
dir1=r'D:\cz_\feixianxing'#引号中的dir为指定文件夹
#获取该路径下所有文件的名称
names=os.listdir(dir1)
print(names)
# 建立储存文件名的矩阵进行文件过滤
inpfile=[]
fortranForfile=[]
print(inpfile)
print(fortranForfile)

#循环得到相应的文件名并添加到对应的文件名矩阵中
for name in names:
    if name.endswith('.inp'):
        inpfile.append(name)
    else:
        if name.endswith('.for'):
            fortranFor.append(name)
        else:
            pass
        pass
print(inpfile)
print(fortranForfile)

#定义产生工况的荷载值随机数值库的函数
def int_random(m,n,o):#m为荷载的下限，n为荷载的上限，o为所需的荷载数量
    p=[]#创建一个空的列表用来储存产生的随机数值
    while len(p)<o:#保证列表里的荷载个数等于指定的数目
        new_int=random.randint(m,n)
        if new_int not in p:#保证列表内元素无重复
            p.append(new_int)
        else:
            pass
    return p
cz=int_random(0,4000000,100)#对船撞荷载产生随机值
print cz
#由于inp文件的名称里面含有作用类型和作用点位置与作用大小的信息将对名字进行整理
for filename in inpfile:
    a = filename.split('.')[0]
    b = a.split('_')[0]
    c = a.split('_')[1]
    d = a.split('_')[2]
    load_type = b
    load_position = c
    load_size = d
    inpname = filename  # 将列表中的文件名赋给变量inpname
    inpname1 = file(inpname, 'r')  # 以只读的形式打开文件
    data1 = inpname1.read()  # 将文本文件
    inpname1.close
    # 修改inp文件并且生成新的input文件
    for cqjtdx in cz:  # 遍历dz库,注此处将inp文件内的堆载荷载值进行修改，修改为cqjtdx以方便后面的批量修改
        inp_name = str(load_type) + '_' + str(load_position) + '_%d' % (cqjtdx)+'.inp'
        data3 = data1
        data3 = data3.replace('cqjtdx', str(cqjtdx))  # 替换dz荷载值
        f3 = file(inp_name, 'w')
        f3.write(data3)  # 写入新文件的内
        f3.close()  # 关闭新文件
print inp_xxxcreated
