# Supplementary material for: Particle Swarm Optimization of Support Vector Machine Inversion Model for Overhead Upright Piers Damage-Inducing Factor
Source: Hindawi journal article supplement (doi:10.1155/2023/8871629), 2023-12-13
Supplement: f3 [file 8871629.f3.txt]

{
 "cells": [
  {
   "cell_type": "code",
   "execution_count": 1,
   "id": "a8d6ed4c",
   "metadata": {},
   "outputs": [],
   "source": [
    "import numpy as np\n",
    "import pandas as pd\n",
    "import matplotlib\n",
    "import seaborn as sns\n",
    "from yellowbrick.classifier import(ConfusionMatrix)\n",
    "from matplotlib.font_manager import FontProperties\n",
    "matplotlib.rc(\"font\", family='Microsoft YaHei')\n",
    "\n",
    "import random\n",
    "import matplotlib.pyplot as plt\n",
    "from sklearn.preprocessing import Normalizer,StandardScaler,MinMaxScaler\n",
    "from sklearn.decomposition import PCA\n",
    "from sklearn.pipeline import make_pipeline\n",
    "# 标签二值化\n",
    "from sklearn.preprocessing import label_binarize\n",
    "from sklearn.model_selection import train_test_split\n",
    "from sklearn.neural_network import MLPRegressor,MLPClassifier\n",
    "from sklearn.svm import SVC,SVR\n",
    "from matplotlib.font_manager import FontProperties\n",
    "\n",
    "from sklearn.model_selection import GridSearchCV\n",
    "from sklearn.model_selection import cross_val_score\n",
    "from sklearn.metrics import roc_auc_score,roc_curve,auc\n",
    "from sklearn import metrics\n",
    "from sklearn.metrics import classification_report\n",
    "# 回归\n",
    "from sklearn.metrics import mean_squared_error,r2_score,accuracy_score,mean_absolute_error,mean_squared_log_error\n",
    "# 分类\n",
    "from sklearn.metrics import f1_score,hamming_loss,label_ranking_average_precision_score,average_precision_score,coverage_error\n",
    "# 绘图\n",
    "plt.rcParams['font.sans-serif']=['SimHei'] # 用来正常显示中文标签\n",
    "plt.rcParams['axes.unicode_minus']=False # 用来正常显示负号\n",
    "font = FontProperties(fname=r\"c:\\windows\\fonts\\simsun.ttc\",size=14)\n",
    "import pandas as pd\n",
    "import numpy as np\n",
    "import random\n",
    "from sklearn.svm import SVC\n",
    "import matplotlib.pyplot as plt\n",
    "from sklearn.model_selection import cross_val_predict\n",
    "from sklearn.metrics import confusion_matrix\n",
    "from sklearn.preprocessing import StandardScaler\n",
    "from sklearn.model_selection import cross_val_score"
   ]
  },
  {
   "cell_type": "code",
   "execution_count": 12,
   "id": "58c94dfe",
   "metadata": {},
   "outputs": [
    {
     "name": "stdout",
     "output_type": "stream",
     "text": [
      "数据大小(10000, 103)\n",
      "分类标签类数\n",
      "4\n",
      "(10000, 103)\n",
      "(10000, 103)\n"
     ]
    }
   ],
   "source": [
    "# 导入数据+噪声\n",
    "#file = pd.read_csv(input(\"D:\\pycsv\\data_cz.csv\"),encoding = 'GB2312',index_col=0)\n",
    "file = pd.read_csv('D:\\pycsv\\data_dz.csv',encoding = 'GB2312',index_col=0)\n",
    "df = pd.DataFrame(file)\n",
    "print('数据大小' + str(df.shape))\n",
    "print(\"分类标签类数\")\n",
    "n_class=df['100'].unique().size\n",
    "print(n_class)\n",
    "\n",
    "print(df.shape)\n",
    "dfh=df.shape[0]\n",
    "dfl=df.shape[1]\n",
    "#参数量\n",
    "x1=np.array(df)\n",
    "print(x1.shape)\n",
    "x=x1[0:dfh,0:100]\n",
    "y=x1[0:dfh,101]\n",
    "n=n_class\n",
    "\n",
    "# x添加高斯噪声\n",
    "mu = 0\n",
    "sigma = 0.1\n",
    "zs_fact=np.max(abs(x))/10\n",
    "for j in range(x.shape[1]):\n",
    "    for i in range(x.shape[0]):\n",
    "        zs=random.gauss(mu,sigma)*zs_fact\n",
    "        x[i,j] += zs"
   ]
  },
  {
   "cell_type": "code",
   "execution_count": 14,
   "id": "b7508bd0",
   "metadata": {},
   "outputs": [],
   "source": [
    "x_gyh=MinMaxScaler().fit_transform(x)"
   ]
  },
  {
   "cell_type": "code",
   "execution_count": 15,
   "id": "614dc110",
   "metadata": {},
   "outputs": [],
   "source": [
    "pca=PCA(n_components=20)\n",
    "X=x_pca=pca.fit_transform(x_gyh)\n",
    "Y=y"
   ]
  },
  {
   "cell_type": "code",
   "execution_count": 16,
   "id": "e5415626",
   "metadata": {},
   "outputs": [],
   "source": [
    "import csv\n",
    "import numpy as np\n",
    "from sklearn.preprocessing import StandardScaler\n",
    "from sklearn.model_selection import train_test_split\n",
    "import matplotlib.pyplot as plt\n",
    "from datetime import datetime \n",
    "from sklearn.metrics import explained_variance_score\n",
    "from sklearn.svm import SVR \n",
    "from sklearn.metrics import mean_squared_error \n",
    "from sklearn.metrics import accuracy_score\n",
    "from sklearn.metrics import confusion_matrix\n",
    "from sklearn.metrics import classification_report\n",
    "from sklearn.metrics import explained_variance_score\n",
    "from sklearn import metrics\n",
    "from sklearn.metrics import mean_absolute_error # 平方绝对误差\n",
    "import random"
   ]
  },
  {
   "cell_type": "code",
   "execution_count": 17,
   "id": "4514ebc2",
   "metadata": {},
   "outputs": [],
   "source": [
    "feature=X\n",
    "targets=Y"
   ]
  },
  {
   "cell_type": "code",
   "execution_count": 18,
   "id": "baf24739",
   "metadata": {},
   "outputs": [
    {
     "name": "stdout",
     "output_type": "stream",
     "text": [
      "MSE: 0.8512227773470865\n",
      "R2 =  0.9936814342060477\n",
      "MAE =  0.7388143877111062\n"
     ]
    }
   ],
   "source": [
    "feature_train, feature_test, target_train, target_test = train_test_split(feature, targets, test_size=0.2,random_state=8)\n",
    "\n",
    "\n",
    "\n",
    "model_svr = SVR(C=1,epsilon=0.1,gamma=0.08)\n",
    "model_svr.fit(feature_train,target_train)\n",
    "predict_results=model_svr.predict(feature_test)\n",
    "print(\"MSE:\",mean_squared_error(target_test,predict_results))\n",
    "print(\"R2 = \",metrics.r2_score(target_test,predict_results)) # R2\n",
    "print(\"MAE = \",mean_absolute_error(target_test,predict_results)) # R2\n",
    "\n"
   ]
  },
  {
   "cell_type": "code",
   "execution_count": 25,
   "id": "65c76601",
   "metadata": {},
   "outputs": [],
   "source": [
    "class PSO:\n",
    "    def __init__(self, parameters):\n",
    "        \"\"\"\n",
    "        particle swarm optimization\n",
    "        parameter: a list type, like [NGEN, pop_size, var_num_min, var_num_max]\n",
    "        \"\"\"\n",
    "        # 初始化\n",
    "        self.NGEN = parameters[0]    # 迭代的代数\n",
    "        self.pop_size = parameters[1]    # 种群大小\n",
    "        self.var_num = len(parameters[2])     # 变量个数\n",
    "        self.bound = []                 # 变量的约束范围\n",
    "        self.bound.append(parameters[2])\n",
    "        self.bound.append(parameters[3])\n",
    " \n",
    "        self.pop_x = np.zeros((self.pop_size, self.var_num))    # 所有粒子的位置\n",
    "        self.pop_v = np.zeros((self.pop_size, self.var_num))    # 所有粒子的速度\n",
    "        self.p_best = np.zeros((self.pop_size, self.var_num))   # 每个粒子最优的位置\n",
    "        self.g_best = np.zeros((1, self.var_num))   # 全局最优的位置\n",
    " \n",
    "        # 初始化第0代初始全局最优解\n",
    "        temp = -1\n",
    "        for i in range(self.pop_size):\n",
    "            for j in range(self.var_num):\n",
    "                self.pop_x[i][j] = random.uniform(self.bound[0][j], self.bound[1][j])\n",
    "                self.pop_v[i][j] = random.uniform(0, 1)\n",
    "            self.p_best[i] = self.pop_x[i]      # 储存最优的个体\n",
    "            fit = self.fitness(self.p_best[i])\n",
    "            if fit > temp:\n",
    "                self.g_best = self.p_best[i]\n",
    "                temp = fit\n",
    " \n",
    "    def fitness(self, ind_var):\n",
    "        X = feature_train\n",
    "        y = target_train\n",
    "        \"\"\"\n",
    "        个体适应值计算\n",
    "        \"\"\"\n",
    "        x1 = ind_var[0]\n",
    "        x2 = ind_var[1]\n",
    "        x3 = ind_var[2]\n",
    "        \n",
    "        if x1==0:x1=0.001\n",
    "        if x2==0:x2=0.001\n",
    "        if x3==0:x3=0.001\n",
    "            \n",
    "        clf = SVR(C=x1,epsilon=x2,gamma=x3)\n",
    "        clf.fit(X, y)\n",
    "        predictval=clf.predict(feature_test)\n",
    "        print(\"MSE = \",metrics.mean_squared_error(target_test,predictval)) # MSE\n",
    "        return  metrics.mean_squared_error(target_test,predictval)\n",
    " \n",
    "    def update_operator(self, pop_size):\n",
    "        \"\"\"\n",
    "        更新算子：更新下一时刻的位置和速度\n",
    "        \"\"\"\n",
    "        c1 = 2     # 学习因子，一般为2\n",
    "        c2 = 2\n",
    "        w = 0.4    # 自身权重因子\n",
    "        for i in range(pop_size):\n",
    "            # 更新速度\n",
    "            self.pop_v[i] = w * self.pop_v[i] + c1 * random.uniform(0, 1) * (\n",
    "                        self.p_best[i] - self.pop_x[i]) + c2 * random.uniform(0, 1) * (self.g_best - self.pop_x[i])\n",
    "            # 更新位置\n",
    "            self.pop_x[i] = self.pop_x[i] + self.pop_v[i]\n",
    "            # 越界保护\n",
    "            for j in range(self.var_num):\n",
    "                if self.pop_x[i][j] < self.bound[0][j]:\n",
    "                    self.pop_x[i][j] = self.bound[0][j]\n",
    "                if self.pop_x[i][j] > self.bound[1][j]:\n",
    "                    self.pop_x[i][j] = self.bound[1][j]\n",
    "            # 更新p_best和g_best\n",
    "            if self.fitness(self.pop_x[i]) < self.fitness(self.p_best[i]):\n",
    "                self.p_best[i] = self.pop_x[i]\n",
    "            if self.fitness(self.pop_x[i]) < self.fitness(self.g_best):\n",
    "                self.g_best = self.pop_x[i]\n",
    " \n",
    "    def main(self):\n",
    "        popobj = []\n",
    "        self.ng_best = np.zeros((1, self.var_num))[0]\n",
    "        for gen in range(self.NGEN):\n",
    "            self.update_operator(self.pop_size)\n",
    "            popobj.append(self.fitness(self.g_best))\n",
    "            print('############ Generation {} ############'.format(str(gen + 1)))\n",
    "            if self.fitness(self.g_best) < self.fitness(self.ng_best):\n",
    "                self.ng_best = self.g_best.copy()\n",
    "            print('最好的位置：{}'.format(self.ng_best))\n",
    "            print('最大的函数值：{}'.format(self.fitness(self.ng_best)))\n",
    "        print(\"---- End of (successful) Searching ----\")\n",
    " \n",
    "        plt.figure()\n",
    "        fig = plt.gcf()\n",
    "        fig.set_size_inches(18.5, 10.5)\n",
    "        plt.title(\"Figure1\")\n",
    "        plt.xlabel(\"iterators\", size=14)\n",
    "        plt.ylabel(\"fitness\", size=14)\n",
    "        t = [t for t in range(self.NGEN)]\n",
    "        plt.plot(t, popobj, color='b', linewidth=2)\n",
    "        plt.show()\n"
   ]
  },
  {
   "cell_type": "code",
   "execution_count": 26,
   "id": "54e4c02d",
   "metadata": {},
   "outputs": [
    {
     "name": "stdout",
     "output_type": "stream",
     "text": [
      "MSE =  134.68840210340167\n",
      "MSE =  134.70356189940864\n",
      "MSE =  134.71634900932435\n",
      "MSE =  134.70670269829571\n",
      "MSE =  134.11037177457672\n",
      "MSE =  134.7172468333407\n",
      "MSE =  5.633555792928699\n",
      "MSE =  42.85398654306489\n",
      "MSE =  134.71746443628953\n",
      "MSE =  0.965483380106063\n",
      "MSE =  51.38219749555376\n",
      "MSE =  134.70614977984332\n",
      "MSE =  111.17620341884063\n",
      "MSE =  134.55962796267005\n",
      "MSE =  1.4791725891309113\n",
      "MSE =  72.08607339836406\n",
      "MSE =  134.70702247185295\n",
      "MSE =  128.63384120457857\n",
      "MSE =  123.75670719228364\n",
      "MSE =  14.288051640276823\n",
      "MSE =  134.7093359605698\n",
      "MSE =  134.68840210340167\n",
      "MSE =  134.7093359605698\n",
      "MSE =  134.71746443628953\n",
      "MSE =  134.7076128233349\n",
      "MSE =  134.70356189940864\n",
      "MSE =  134.7076128233349\n",
      "MSE =  134.7093359605698\n",
      "MSE =  134.61325502424285\n",
      "MSE =  134.71634900932435\n",
      "MSE =  134.61325502424285\n",
      "MSE =  134.7076128233349\n",
      "MSE =  134.560983843545\n",
      "MSE =  134.70670269829571\n",
      "MSE =  134.560983843545\n",
      "MSE =  134.61325502424285\n",
      "MSE =  134.3165908879235\n",
      "MSE =  134.11037177457672\n",
      "MSE =  134.3165908879235\n",
      "MSE =  134.560983843545\n",
      "MSE =  116.35526670815011\n",
      "MSE =  134.7172468333407\n",
      "MSE =  116.35526670815011\n",
      "MSE =  134.3165908879235\n",
      "MSE =  14.575076386075843\n",
      "MSE =  5.633555792928699\n",
      "MSE =  14.575076386075843\n",
      "MSE =  116.35526670815011\n",
      "MSE =  23.180558672960686\n",
      "MSE =  42.85398654306489\n",
      "MSE =  23.180558672960686\n",
      "MSE =  14.575076386075843\n",
      "MSE =  4.960757321590978\n",
      "MSE =  134.71746443628953\n",
      "MSE =  4.960757321590978\n",
      "MSE =  14.575076386075843\n",
      "MSE =  0.9848926351554024\n",
      "MSE =  0.965483380106063\n",
      "MSE =  0.9848926351554024\n",
      "MSE =  4.960757321590978\n",
      "MSE =  26.341471685262842\n",
      "MSE =  51.38219749555376\n",
      "MSE =  26.341471685262842\n",
      "MSE =  0.9848926351554024\n",
      "MSE =  134.69298968945893\n",
      "MSE =  134.70614977984332\n",
      "MSE =  134.69298968945893\n",
      "MSE =  0.9848926351554024\n",
      "MSE =  6.759958512126912\n",
      "MSE =  111.17620341884063\n",
      "MSE =  6.759958512126912\n",
      "MSE =  0.9848926351554024\n",
      "MSE =  133.49582266169193\n",
      "MSE =  134.55962796267005\n",
      "MSE =  133.49582266169193\n",
      "MSE =  0.9848926351554024\n",
      "MSE =  0.9239625430413743\n",
      "MSE =  1.4791725891309113\n",
      "MSE =  0.9239625430413743\n",
      "MSE =  0.9848926351554024\n",
      "MSE =  2.8295690768271866\n",
      "MSE =  72.08607339836406\n",
      "MSE =  2.8295690768271866\n",
      "MSE =  0.9239625430413743\n",
      "MSE =  132.17272955321593\n",
      "MSE =  134.70702247185295\n",
      "MSE =  132.17272955321593\n",
      "MSE =  0.9239625430413743\n",
      "MSE =  119.76129504968826\n",
      "MSE =  128.63384120457857\n",
      "MSE =  119.76129504968826\n",
      "MSE =  0.9239625430413743\n",
      "MSE =  13.201450672103336\n",
      "MSE =  123.75670719228364\n",
      "MSE =  13.201450672103336\n",
      "MSE =  0.9239625430413743\n",
      "MSE =  1.5838445797986607\n",
      "MSE =  14.288051640276823\n",
      "MSE =  1.5838445797986607\n",
      "MSE =  0.9239625430413743\n",
      "MSE =  0.9239625430413743\n",
      "############ Generation 1 ############\n",
      "MSE =  0.9239625430413743\n",
      "MSE =  134.6131688423327\n",
      "最好的位置：[10.          1.63394978  0.55450806]\n",
      "MSE =  0.9239625430413743\n",
      "最大的函数值：0.9239625430413743\n",
      "MSE =  1.7913447197871122\n",
      "MSE =  134.68840210340167\n",
      "MSE =  1.7913447197871122\n",
      "MSE =  0.9239625430413743\n",
      "MSE =  28.621332481966007\n",
      "MSE =  134.70356189940864\n",
      "MSE =  28.621332481966007\n",
      "MSE =  0.9239625430413743\n",
      "MSE =  1.612918333287521\n",
      "MSE =  134.61325502424285\n",
      "MSE =  1.612918333287521\n",
      "MSE =  0.9239625430413743\n",
      "MSE =  106.84322222237824\n",
      "MSE =  134.560983843545\n",
      "MSE =  106.84322222237824\n",
      "MSE =  0.9239625430413743\n",
      "MSE =  1.5257652077935488\n",
      "MSE =  134.11037177457672\n",
      "MSE =  1.5257652077935488\n",
      "MSE =  0.9239625430413743\n",
      "MSE =  1.6427676297359453\n",
      "MSE =  116.35526670815011\n",
      "MSE =  1.6427676297359453\n",
      "MSE =  0.9239625430413743\n",
      "MSE =  4.419605410174694\n",
      "MSE =  5.633555792928699\n",
      "MSE =  4.419605410174694\n",
      "MSE =  0.9239625430413743\n",
      "MSE =  1.33679025483627\n",
      "MSE =  23.180558672960686\n",
      "MSE =  1.33679025483627\n",
      "MSE =  0.9239625430413743\n",
      "MSE =  2.703070622911167\n",
      "MSE =  4.960757321590978\n",
      "MSE =  2.703070622911167\n",
      "MSE =  0.9239625430413743\n",
      "MSE =  0.8752177600332486\n",
      "MSE =  0.965483380106063\n",
      "MSE =  0.8752177600332486\n",
      "MSE =  0.9239625430413743\n",
      "MSE =  1.618118514524094\n",
      "MSE =  26.341471685262842\n",
      "MSE =  1.618118514524094\n",
      "MSE =  0.8752177600332486\n",
      "MSE =  126.62705256558128\n",
      "MSE =  134.69298968945893\n",
      "MSE =  126.62705256558128\n",
      "MSE =  0.8752177600332486\n",
      "MSE =  4.3804724767591\n",
      "MSE =  6.759958512126912\n",
      "MSE =  4.3804724767591\n",
      "MSE =  0.8752177600332486\n",
      "MSE =  105.86203968377393\n",
      "MSE =  133.49582266169193\n",
      "MSE =  105.86203968377393\n",
      "MSE =  0.8752177600332486\n",
      "MSE =  0.8455502939556271\n",
      "MSE =  0.9239625430413743\n",
      "MSE =  0.8455502939556271\n",
      "MSE =  0.8752177600332486\n",
      "MSE =  2.4234800103155294\n",
      "MSE =  2.8295690768271866\n",
      "MSE =  2.4234800103155294\n",
      "MSE =  0.8455502939556271\n",
      "MSE =  2.002930762220176\n",
      "MSE =  132.17272955321593\n",
      "MSE =  2.002930762220176\n",
      "MSE =  0.8455502939556271\n",
      "MSE =  1.6580841935661494\n",
      "MSE =  119.76129504968826\n",
      "MSE =  1.6580841935661494\n",
      "MSE =  0.8455502939556271\n",
      "MSE =  2.2543188169230626\n",
      "MSE =  13.201450672103336\n",
      "MSE =  2.2543188169230626\n",
      "MSE =  0.8455502939556271\n",
      "MSE =  1.5722057823458644\n",
      "MSE =  1.5838445797986607\n",
      "MSE =  1.5722057823458644\n",
      "MSE =  0.8455502939556271\n",
      "MSE =  0.8455502939556271\n",
      "############ Generation 2 ############\n",
      "MSE =  0.8455502939556271\n",
      "MSE =  0.9239625430413743\n",
      "最好的位置：[10.          1.09490579  0.58677221]\n",
      "MSE =  0.8455502939556271\n",
      "最大的函数值：0.8455502939556271\n",
      "MSE =  1.5720762671996784\n",
      "MSE =  1.7913447197871122\n",
      "MSE =  1.5720762671996784\n",
      "MSE =  0.8455502939556271\n",
      "MSE =  1.5706434066803816\n",
      "MSE =  28.621332481966007\n",
      "MSE =  1.5706434066803816\n",
      "MSE =  0.8455502939556271\n",
      "MSE =  1.5722057823458644\n",
      "MSE =  1.612918333287521\n",
      "MSE =  1.5722057823458644\n",
      "MSE =  0.8455502939556271\n",
      "MSE =  2.6799105230276856\n",
      "MSE =  106.84322222237824\n",
      "MSE =  2.6799105230276856\n",
      "MSE =  0.8455502939556271\n",
      "MSE =  1.5877534351693547\n",
      "MSE =  1.5257652077935488\n",
      "MSE =  1.5877534351693547\n",
      "MSE =  0.8455502939556271\n",
      "MSE =  1.595720175336091\n",
      "MSE =  1.6427676297359453\n",
      "MSE =  1.595720175336091\n",
      "MSE =  0.8455502939556271\n",
      "MSE =  1.5722057823458644\n",
      "MSE =  4.419605410174694\n",
      "MSE =  1.5722057823458644\n",
      "MSE =  0.8455502939556271\n",
      "MSE =  1.5709259054220497\n",
      "MSE =  1.33679025483627\n",
      "MSE =  1.5709259054220497\n",
      "MSE =  0.8455502939556271\n",
      "MSE =  1.5722057823458644\n",
      "MSE =  2.703070622911167\n",
      "MSE =  1.5722057823458644\n",
      "MSE =  0.8455502939556271\n",
      "MSE =  0.8309634939494281\n",
      "MSE =  0.8752177600332486\n",
      "MSE =  0.8309634939494281\n",
      "MSE =  0.8455502939556271\n",
      "MSE =  1.5722057823458644\n",
      "MSE =  1.618118514524094\n",
      "MSE =  1.5722057823458644\n",
      "MSE =  0.8309634939494281\n",
      "MSE =  1.5925333057463926\n",
      "MSE =  126.62705256558128\n",
      "MSE =  1.5925333057463926\n",
      "MSE =  0.8309634939494281\n",
      "MSE =  2.5612704787136\n",
      "MSE =  4.3804724767591\n",
      "MSE =  2.5612704787136\n",
      "MSE =  0.8309634939494281\n",
      "MSE =  5.18621805835274\n",
      "MSE =  105.86203968377393\n",
      "MSE =  5.18621805835274\n",
      "MSE =  0.8309634939494281\n",
      "MSE =  0.8755931584354\n",
      "MSE =  0.8455502939556271\n",
      "MSE =  0.8755931584354\n",
      "MSE =  0.8309634939494281\n",
      "MSE =  1.6222734411371493\n",
      "MSE =  2.4234800103155294\n",
      "MSE =  1.6222734411371493\n",
      "MSE =  0.8309634939494281\n",
      "MSE =  1.5748523476194982\n",
      "MSE =  2.002930762220176\n",
      "MSE =  1.5748523476194982\n",
      "MSE =  0.8309634939494281\n",
      "MSE =  1.5722057823458644\n",
      "MSE =  1.6580841935661494\n",
      "MSE =  1.5722057823458644\n",
      "MSE =  0.8309634939494281\n",
      "MSE =  1.5722057823458644\n",
      "MSE =  2.2543188169230626\n",
      "MSE =  1.5722057823458644\n",
      "MSE =  0.8309634939494281\n",
      "MSE =  1.5722057823458644\n",
      "MSE =  1.5722057823458644\n",
      "MSE =  1.5722057823458644\n",
      "MSE =  0.8309634939494281\n",
      "MSE =  0.8309634939494281\n",
      "############ Generation 3 ############\n",
      "MSE =  0.8309634939494281\n",
      "MSE =  0.8455502939556271\n",
      "最好的位置：[10.          0.58820459  0.7774373 ]\n",
      "MSE =  0.8309634939494281\n",
      "最大的函数值：0.8309634939494281\n",
      "MSE =  1.5952182550952292\n",
      "MSE =  1.5720762671996784\n",
      "MSE =  1.5952182550952292\n",
      "MSE =  0.8309634939494281\n",
      "MSE =  1.5786740952760001\n",
      "MSE =  1.5706434066803816\n",
      "MSE =  1.5786740952760001\n",
      "MSE =  0.8309634939494281\n",
      "MSE =  1.5833713571300017\n",
      "MSE =  1.5722057823458644\n",
      "MSE =  1.5833713571300017\n",
      "MSE =  0.8309634939494281\n",
      "MSE =  1.5722057823458644\n",
      "MSE =  2.6799105230276856\n",
      "MSE =  1.5722057823458644\n",
      "MSE =  0.8309634939494281\n",
      "MSE =  1.6071100568495345\n",
      "MSE =  1.5257652077935488\n",
      "MSE =  1.6071100568495345\n",
      "MSE =  0.8309634939494281\n",
      "MSE =  1.5920853742937628\n",
      "MSE =  1.595720175336091\n",
      "MSE =  1.5920853742937628\n",
      "MSE =  0.8309634939494281\n",
      "MSE =  1.5722057823458644\n",
      "MSE =  1.5722057823458644\n",
      "MSE =  1.5722057823458644\n",
      "MSE =  0.8309634939494281\n",
      "MSE =  0.880762876509502\n",
      "MSE =  1.33679025483627\n",
      "MSE =  0.880762876509502\n",
      "MSE =  0.8309634939494281\n",
      "MSE =  1.574976829867715\n",
      "MSE =  1.5722057823458644\n",
      "MSE =  1.574976829867715\n"
     ]
    },
    {
     "name": "stdout",
     "output_type": "stream",
     "text": [
      "MSE =  0.8309634939494281\n",
      "MSE =  0.8256443062991705\n",
      "MSE =  0.8309634939494281\n",
      "MSE =  0.8256443062991705\n",
      "MSE =  0.8256443062991705\n",
      "MSE =  1.5714339351719544\n",
      "MSE =  1.5722057823458644\n",
      "MSE =  1.5714339351719544\n",
      "MSE =  0.8256443062991705\n",
      "MSE =  1.5829998327148462\n",
      "MSE =  1.5925333057463926\n",
      "MSE =  1.5829998327148462\n",
      "MSE =  0.8256443062991705\n",
      "MSE =  1.5722057823458644\n",
      "MSE =  2.5612704787136\n",
      "MSE =  1.5722057823458644\n",
      "MSE =  0.8256443062991705\n",
      "MSE =  1.6792733359198022\n",
      "MSE =  5.18621805835274\n",
      "MSE =  1.6792733359198022\n",
      "MSE =  0.8256443062991705\n",
      "MSE =  0.8579394340882883\n",
      "MSE =  0.8455502939556271\n",
      "MSE =  0.8579394340882883\n",
      "MSE =  0.8256443062991705\n",
      "MSE =  1.5698793407041463\n",
      "MSE =  1.6222734411371493\n",
      "MSE =  1.5698793407041463\n",
      "MSE =  0.8256443062991705\n",
      "MSE =  1.5722057823458644\n",
      "MSE =  1.5748523476194982\n",
      "MSE =  1.5722057823458644\n",
      "MSE =  0.8256443062991705\n",
      "MSE =  1.5739015792355098\n",
      "MSE =  1.5722057823458644\n",
      "MSE =  1.5739015792355098\n",
      "MSE =  0.8256443062991705\n",
      "MSE =  0.7675796448745502\n",
      "MSE =  1.5722057823458644\n",
      "MSE =  0.7675796448745502\n",
      "MSE =  0.8256443062991705\n",
      "MSE =  1.5722057823458644\n",
      "MSE =  1.5722057823458644\n",
      "MSE =  1.5722057823458644\n",
      "MSE =  0.7675796448745502\n",
      "MSE =  0.7675796448745502\n",
      "############ Generation 4 ############\n",
      "MSE =  0.7675796448745502\n",
      "MSE =  0.8309634939494281\n",
      "最好的位置：[10.          0.          0.07482081]\n",
      "MSE =  0.7675796448745502\n",
      "最大的函数值：0.7675796448745502\n",
      "MSE =  1.5722057823458644\n",
      "MSE =  1.5720762671996784\n",
      "MSE =  1.5722057823458644\n",
      "MSE =  0.7675796448745502\n",
      "MSE =  1.57231789425036\n",
      "MSE =  1.5706434066803816\n",
      "MSE =  1.57231789425036\n",
      "MSE =  0.7675796448745502\n",
      "MSE =  1.5722057823458644\n",
      "MSE =  1.5722057823458644\n",
      "MSE =  1.5722057823458644\n",
      "MSE =  0.7675796448745502\n",
      "MSE =  1.5722057823458644\n",
      "MSE =  1.5722057823458644\n",
      "MSE =  1.5722057823458644\n",
      "MSE =  0.7675796448745502\n",
      "MSE =  1.0224120687617968\n",
      "MSE =  1.5257652077935488\n",
      "MSE =  1.0224120687617968\n",
      "MSE =  0.7675796448745502\n",
      "MSE =  1.5702794581435808\n",
      "MSE =  1.5920853742937628\n",
      "MSE =  1.5702794581435808\n",
      "MSE =  0.7675796448745502\n",
      "MSE =  1.5722057823458644\n",
      "MSE =  1.5722057823458644\n",
      "MSE =  1.5722057823458644\n",
      "MSE =  0.7675796448745502\n",
      "MSE =  1.5722057823458644\n",
      "MSE =  0.880762876509502\n",
      "MSE =  1.5722057823458644\n",
      "MSE =  0.7675796448745502\n",
      "MSE =  1.5722057823458644\n",
      "MSE =  1.5722057823458644\n",
      "MSE =  1.5722057823458644\n",
      "MSE =  0.7675796448745502\n",
      "MSE =  1.5722057823458644\n",
      "MSE =  0.8256443062991705\n",
      "MSE =  1.5722057823458644\n",
      "MSE =  0.7675796448745502\n",
      "MSE =  1.5723554452435606\n",
      "MSE =  1.5714339351719544\n",
      "MSE =  1.5723554452435606\n",
      "MSE =  0.7675796448745502\n",
      "MSE =  1.570282115182515\n",
      "MSE =  1.5829998327148462\n",
      "MSE =  1.570282115182515\n",
      "MSE =  0.7675796448745502\n",
      "MSE =  1.5722057823458644\n",
      "MSE =  1.5722057823458644\n",
      "MSE =  1.5722057823458644\n",
      "MSE =  0.7675796448745502\n",
      "MSE =  1.596183187064211\n",
      "MSE =  1.6792733359198022\n",
      "MSE =  1.596183187064211\n",
      "MSE =  0.7675796448745502\n",
      "MSE =  0.9068977713629085\n",
      "MSE =  0.8455502939556271\n",
      "MSE =  0.9068977713629085\n",
      "MSE =  0.7675796448745502\n",
      "MSE =  1.5722057823458644\n",
      "MSE =  1.5698793407041463\n",
      "MSE =  1.5722057823458644\n",
      "MSE =  0.7675796448745502\n",
      "MSE =  1.5722057823458644\n",
      "MSE =  1.5722057823458644\n",
      "MSE =  1.5722057823458644\n",
      "MSE =  0.7675796448745502\n",
      "MSE =  1.5725531208081311\n",
      "MSE =  1.5722057823458644\n",
      "MSE =  1.5725531208081311\n",
      "MSE =  0.7675796448745502\n",
      "MSE =  0.7489211502229495\n",
      "MSE =  0.7675796448745502\n",
      "MSE =  0.7489211502229495\n",
      "MSE =  0.7489211502229495\n",
      "MSE =  1.5722057823458644\n",
      "MSE =  1.5722057823458644\n",
      "MSE =  1.5722057823458644\n",
      "MSE =  0.7489211502229495\n",
      "MSE =  0.7489211502229495\n",
      "############ Generation 5 ############\n",
      "MSE =  0.7489211502229495\n",
      "MSE =  0.7675796448745502\n",
      "最好的位置：[10.          0.          0.10474913]\n",
      "MSE =  0.7489211502229495\n",
      "最大的函数值：0.7489211502229495\n",
      "MSE =  1.5722057823458644\n",
      "MSE =  1.5720762671996784\n",
      "MSE =  1.5722057823458644\n",
      "MSE =  0.7489211502229495\n",
      "MSE =  1.5700325697423911\n",
      "MSE =  1.5706434066803816\n",
      "MSE =  1.5700325697423911\n",
      "MSE =  0.7489211502229495\n",
      "MSE =  1.5722057823458644\n",
      "MSE =  1.5722057823458644\n",
      "MSE =  1.5722057823458644\n",
      "MSE =  0.7489211502229495\n",
      "MSE =  1.5722057823458644\n",
      "MSE =  1.5722057823458644\n",
      "MSE =  1.5722057823458644\n",
      "MSE =  0.7489211502229495\n",
      "MSE =  0.9670233920503873\n",
      "MSE =  1.0224120687617968\n",
      "MSE =  0.9670233920503873\n",
      "MSE =  0.7489211502229495\n",
      "MSE =  1.5722057823458644\n",
      "MSE =  1.5702794581435808\n",
      "MSE =  1.5722057823458644\n",
      "MSE =  0.7489211502229495\n",
      "MSE =  1.5722057823458644\n",
      "MSE =  1.5722057823458644\n",
      "MSE =  1.5722057823458644\n",
      "MSE =  0.7489211502229495\n",
      "MSE =  0.7477740172557118\n",
      "MSE =  0.880762876509502\n",
      "MSE =  0.7477740172557118\n",
      "MSE =  0.7489211502229495\n",
      "MSE =  1.6238750621008817\n",
      "MSE =  1.5722057823458644\n",
      "MSE =  1.6238750621008817\n",
      "MSE =  0.7477740172557118\n",
      "MSE =  1.135629521260065\n",
      "MSE =  0.8256443062991705\n",
      "MSE =  1.135629521260065\n",
      "MSE =  0.7477740172557118\n",
      "MSE =  0.7733706253402854\n",
      "MSE =  1.5714339351719544\n",
      "MSE =  0.7733706253402854\n",
      "MSE =  0.7477740172557118\n",
      "MSE =  1.5925643043113618\n",
      "MSE =  1.570282115182515\n",
      "MSE =  1.5925643043113618\n",
      "MSE =  0.7477740172557118\n",
      "MSE =  1.5722057823458644\n",
      "MSE =  1.5722057823458644\n",
      "MSE =  1.5722057823458644\n",
      "MSE =  0.7477740172557118\n",
      "MSE =  1.583505812578314\n",
      "MSE =  1.596183187064211\n",
      "MSE =  1.583505812578314\n",
      "MSE =  0.7477740172557118\n",
      "MSE =  0.7853493883855874\n",
      "MSE =  0.8455502939556271\n",
      "MSE =  0.7853493883855874\n",
      "MSE =  0.7477740172557118\n",
      "MSE =  0.750433364838759\n",
      "MSE =  1.5698793407041463\n",
      "MSE =  0.750433364838759\n",
      "MSE =  0.7477740172557118\n",
      "MSE =  1.570273026901833\n",
      "MSE =  1.5722057823458644\n",
      "MSE =  1.570273026901833\n",
      "MSE =  0.7477740172557118\n",
      "MSE =  1.5952408415212511\n",
      "MSE =  1.5722057823458644\n",
      "MSE =  1.5952408415212511\n",
      "MSE =  0.7477740172557118\n",
      "MSE =  0.7549737127514601\n",
      "MSE =  0.7489211502229495\n",
      "MSE =  0.7549737127514601\n",
      "MSE =  0.7477740172557118\n",
      "MSE =  0.7778512618710111\n",
      "MSE =  1.5722057823458644\n",
      "MSE =  0.7778512618710111\n",
      "MSE =  0.7477740172557118\n",
      "MSE =  0.7477740172557118\n",
      "############ Generation 6 ############\n",
      "MSE =  0.7477740172557118\n",
      "MSE =  0.7489211502229495\n",
      "最好的位置：[10.          0.42300896  0.26930674]\n",
      "MSE =  0.7477740172557118\n",
      "最大的函数值：0.7477740172557118\n",
      "MSE =  1.5703649066222638\n",
      "MSE =  1.5720762671996784\n",
      "MSE =  1.5703649066222638\n",
      "MSE =  0.7477740172557118\n",
      "MSE =  1.572223411259518\n",
      "MSE =  1.5700325697423911\n",
      "MSE =  1.572223411259518\n",
      "MSE =  0.7477740172557118\n",
      "MSE =  1.5741613415539304\n",
      "MSE =  1.5722057823458644\n",
      "MSE =  1.5741613415539304\n",
      "MSE =  0.7477740172557118\n",
      "MSE =  1.5714508793932123\n",
      "MSE =  1.5722057823458644\n",
      "MSE =  1.5714508793932123\n",
      "MSE =  0.7477740172557118\n",
      "MSE =  1.5926892202752228\n",
      "MSE =  0.9670233920503873\n",
      "MSE =  1.5926892202752228\n",
      "MSE =  0.7477740172557118\n",
      "MSE =  1.5992295323278845\n",
      "MSE =  1.5702794581435808\n",
      "MSE =  1.5992295323278845\n",
      "MSE =  0.7477740172557118\n",
      "MSE =  0.7356069541188681\n",
      "MSE =  1.5722057823458644\n",
      "MSE =  0.7356069541188681\n",
      "MSE =  0.7477740172557118\n",
      "MSE =  0.7427851726334044\n",
      "MSE =  0.7477740172557118\n",
      "MSE =  0.7427851726334044\n",
      "MSE =  0.7356069541188681\n",
      "MSE =  1.5766900078560317\n",
      "MSE =  1.5722057823458644\n",
      "MSE =  1.5766900078560317\n",
      "MSE =  0.7356069541188681\n",
      "MSE =  1.5722057823458644\n",
      "MSE =  0.8256443062991705\n",
      "MSE =  1.5722057823458644\n",
      "MSE =  0.7356069541188681\n",
      "MSE =  0.7420099714259721\n",
      "MSE =  0.7733706253402854\n",
      "MSE =  0.7420099714259721\n",
      "MSE =  0.7356069541188681\n",
      "MSE =  1.5903824546494452\n",
      "MSE =  1.570282115182515\n",
      "MSE =  1.5903824546494452\n",
      "MSE =  0.7356069541188681\n",
      "MSE =  1.1903735299610776\n",
      "MSE =  1.5722057823458644\n",
      "MSE =  1.1903735299610776\n",
      "MSE =  0.7356069541188681\n",
      "MSE =  1.581892642676963\n",
      "MSE =  1.583505812578314\n",
      "MSE =  1.581892642676963\n",
      "MSE =  0.7356069541188681\n",
      "MSE =  0.7580876725222504\n",
      "MSE =  0.7853493883855874\n",
      "MSE =  0.7580876725222504\n",
      "MSE =  0.7356069541188681\n",
      "MSE =  0.77121397429797\n",
      "MSE =  0.750433364838759\n",
      "MSE =  0.77121397429797\n",
      "MSE =  0.7356069541188681\n",
      "MSE =  1.5872888679182628\n",
      "MSE =  1.570273026901833\n",
      "MSE =  1.5872888679182628\n",
      "MSE =  0.7356069541188681\n",
      "MSE =  1.5722057823458644\n",
      "MSE =  1.5722057823458644\n",
      "MSE =  1.5722057823458644\n",
      "MSE =  0.7356069541188681\n",
      "MSE =  1.2659169801014787\n",
      "MSE =  0.7489211502229495\n",
      "MSE =  1.2659169801014787\n",
      "MSE =  0.7356069541188681\n",
      "MSE =  0.7438660217716415\n",
      "MSE =  0.7778512618710111\n",
      "MSE =  0.7438660217716415\n",
      "MSE =  0.7356069541188681\n",
      "MSE =  0.7356069541188681\n",
      "############ Generation 7 ############\n",
      "MSE =  0.7356069541188681\n",
      "MSE =  0.7477740172557118\n",
      "最好的位置：[10.          0.42226451  0.14197016]\n",
      "MSE =  0.7356069541188681\n",
      "最大的函数值：0.7356069541188681\n"
     ]
    },
    {
     "name": "stdout",
     "output_type": "stream",
     "text": [
      "MSE =  1.5998121588058507\n",
      "MSE =  1.5703649066222638\n",
      "MSE =  1.5998121588058507\n",
      "MSE =  0.7356069541188681\n",
      "MSE =  1.572264941594258\n",
      "MSE =  1.5700325697423911\n",
      "MSE =  1.572264941594258\n",
      "MSE =  0.7356069541188681\n",
      "MSE =  1.5742686204200207\n",
      "MSE =  1.5722057823458644\n",
      "MSE =  1.5742686204200207\n",
      "MSE =  0.7356069541188681\n",
      "MSE =  1.5996539413799882\n",
      "MSE =  1.5714508793932123\n",
      "MSE =  1.5996539413799882\n",
      "MSE =  0.7356069541188681\n",
      "MSE =  1.0908585221665525\n",
      "MSE =  0.9670233920503873\n",
      "MSE =  1.0908585221665525\n",
      "MSE =  0.7356069541188681\n",
      "MSE =  1.6267125741109267\n",
      "MSE =  1.5702794581435808\n",
      "MSE =  1.6267125741109267\n",
      "MSE =  0.7356069541188681\n",
      "MSE =  0.7362317580985236\n",
      "MSE =  0.7356069541188681\n",
      "MSE =  0.7362317580985236\n",
      "MSE =  0.7362317580985236\n",
      "MSE =  0.7436672203626649\n",
      "MSE =  0.7427851726334044\n",
      "MSE =  0.7436672203626649\n",
      "MSE =  0.7362317580985236\n",
      "MSE =  0.7468707378466083\n",
      "MSE =  1.5722057823458644\n",
      "MSE =  0.7468707378466083\n",
      "MSE =  0.7362317580985236\n",
      "MSE =  1.5720117445655655\n",
      "MSE =  0.8256443062991705\n",
      "MSE =  1.5720117445655655\n",
      "MSE =  0.7362317580985236\n",
      "MSE =  0.7539311737143973\n",
      "MSE =  0.7420099714259721\n",
      "MSE =  0.7539311737143973\n",
      "MSE =  0.7362317580985236\n",
      "MSE =  1.5753760624476494\n",
      "MSE =  1.570282115182515\n",
      "MSE =  1.5753760624476494\n",
      "MSE =  0.7362317580985236\n",
      "MSE =  0.7881940139149383\n",
      "MSE =  1.1903735299610776\n",
      "MSE =  0.7881940139149383\n",
      "MSE =  0.7362317580985236\n",
      "MSE =  1.585602804216071\n",
      "MSE =  1.581892642676963\n",
      "MSE =  1.585602804216071\n",
      "MSE =  0.7362317580985236\n",
      "MSE =  0.7912732939399043\n",
      "MSE =  0.7580876725222504\n",
      "MSE =  0.7912732939399043\n",
      "MSE =  0.7362317580985236\n",
      "MSE =  0.7360114250786545\n",
      "MSE =  0.750433364838759\n",
      "MSE =  0.7360114250786545\n",
      "MSE =  0.7362317580985236\n",
      "MSE =  0.7419597240612715\n",
      "MSE =  1.570273026901833\n",
      "MSE =  0.7419597240612715\n",
      "MSE =  0.7360114250786545\n",
      "MSE =  0.9632360596226202\n",
      "MSE =  1.5722057823458644\n",
      "MSE =  0.9632360596226202\n",
      "MSE =  0.7360114250786545\n",
      "MSE =  0.7627793489440403\n",
      "MSE =  0.7489211502229495\n",
      "MSE =  0.7627793489440403\n",
      "MSE =  0.7360114250786545\n",
      "MSE =  0.7511861263857099\n",
      "MSE =  0.7438660217716415\n",
      "MSE =  0.7511861263857099\n",
      "MSE =  0.7360114250786545\n",
      "MSE =  0.7360114250786545\n",
      "############ Generation 8 ############\n",
      "MSE =  0.7360114250786545\n",
      "MSE =  0.7356069541188681\n",
      "最好的位置：[10.          0.42226451  0.14197016]\n",
      "MSE =  0.7356069541188681\n",
      "最大的函数值：0.7356069541188681\n",
      "MSE =  0.735049508044772\n",
      "MSE =  1.5703649066222638\n",
      "MSE =  0.735049508044772\n",
      "MSE =  0.7360114250786545\n",
      "MSE =  1.5722203153925198\n",
      "MSE =  1.5700325697423911\n",
      "MSE =  1.5722203153925198\n",
      "MSE =  0.735049508044772\n",
      "MSE =  0.7810275170027933\n",
      "MSE =  1.5722057823458644\n",
      "MSE =  0.7810275170027933\n",
      "MSE =  0.735049508044772\n",
      "MSE =  0.7410246796097067\n",
      "MSE =  1.5714508793932123\n",
      "MSE =  0.7410246796097067\n",
      "MSE =  0.735049508044772\n",
      "MSE =  0.7621232952984958\n",
      "MSE =  0.9670233920503873\n",
      "MSE =  0.7621232952984958\n",
      "MSE =  0.735049508044772\n",
      "MSE =  0.7329002106290825\n",
      "MSE =  1.5702794581435808\n",
      "MSE =  0.7329002106290825\n",
      "MSE =  0.735049508044772\n",
      "MSE =  0.7321080902145521\n",
      "MSE =  0.7356069541188681\n",
      "MSE =  0.7321080902145521\n",
      "MSE =  0.7329002106290825\n",
      "MSE =  0.7313070670209697\n",
      "MSE =  0.7427851726334044\n",
      "MSE =  0.7313070670209697\n",
      "MSE =  0.7321080902145521\n",
      "MSE =  0.7412779516351611\n",
      "MSE =  0.7468707378466083\n",
      "MSE =  0.7412779516351611\n",
      "MSE =  0.7313070670209697\n",
      "MSE =  0.9368184992288319\n",
      "MSE =  0.8256443062991705\n",
      "MSE =  0.9368184992288319\n",
      "MSE =  0.7313070670209697\n",
      "MSE =  0.7848598205761147\n",
      "MSE =  0.7420099714259721\n",
      "MSE =  0.7848598205761147\n",
      "MSE =  0.7313070670209697\n",
      "MSE =  0.812031787034956\n",
      "MSE =  1.570282115182515\n",
      "MSE =  0.812031787034956\n",
      "MSE =  0.7313070670209697\n",
      "MSE =  0.7342885121573827\n",
      "MSE =  0.7881940139149383\n",
      "MSE =  0.7342885121573827\n",
      "MSE =  0.7313070670209697\n",
      "MSE =  0.7414123192165283\n",
      "MSE =  1.581892642676963\n",
      "MSE =  0.7414123192165283\n",
      "MSE =  0.7313070670209697\n",
      "MSE =  0.8111583847301377\n",
      "MSE =  0.7580876725222504\n",
      "MSE =  0.8111583847301377\n",
      "MSE =  0.7313070670209697\n",
      "MSE =  0.7393996574038905\n",
      "MSE =  0.7360114250786545\n",
      "MSE =  0.7393996574038905\n",
      "MSE =  0.7313070670209697\n",
      "MSE =  0.7505301207289976\n",
      "MSE =  0.7419597240612715\n",
      "MSE =  0.7505301207289976\n",
      "MSE =  0.7313070670209697\n",
      "MSE =  0.8403935658718618\n",
      "MSE =  0.9632360596226202\n",
      "MSE =  0.8403935658718618\n",
      "MSE =  0.7313070670209697\n",
      "MSE =  0.9141311677145638\n",
      "MSE =  0.7489211502229495\n",
      "MSE =  0.9141311677145638\n",
      "MSE =  0.7313070670209697\n",
      "MSE =  0.7990238193172579\n",
      "MSE =  0.7438660217716415\n",
      "MSE =  0.7990238193172579\n",
      "MSE =  0.7313070670209697\n",
      "MSE =  0.7313070670209697\n",
      "############ Generation 9 ############\n",
      "MSE =  0.7313070670209697\n",
      "MSE =  0.7356069541188681\n",
      "最好的位置：[10.          0.18542699  0.19551375]\n",
      "MSE =  0.7313070670209697\n",
      "最大的函数值：0.7313070670209697\n",
      "MSE =  0.7416490100822138\n",
      "MSE =  0.735049508044772\n",
      "MSE =  0.7416490100822138\n",
      "MSE =  0.7313070670209697\n",
      "MSE =  0.7408545277643127\n",
      "MSE =  1.5700325697423911\n",
      "MSE =  0.7408545277643127\n",
      "MSE =  0.7313070670209697\n",
      "MSE =  0.7357163054016724\n",
      "MSE =  0.7810275170027933\n",
      "MSE =  0.7357163054016724\n",
      "MSE =  0.7313070670209697\n",
      "MSE =  0.7368667200807105\n",
      "MSE =  0.7410246796097067\n",
      "MSE =  0.7368667200807105\n",
      "MSE =  0.7313070670209697\n",
      "MSE =  1.5777978866042797\n",
      "MSE =  0.7621232952984958\n",
      "MSE =  1.5777978866042797\n",
      "MSE =  0.7313070670209697\n",
      "MSE =  0.7385851633955053\n",
      "MSE =  0.7329002106290825\n",
      "MSE =  0.7385851633955053\n",
      "MSE =  0.7313070670209697\n",
      "MSE =  0.7332963198500024\n",
      "MSE =  0.7321080902145521\n",
      "MSE =  0.7332963198500024\n",
      "MSE =  0.7313070670209697\n",
      "MSE =  0.7343742237410468\n",
      "MSE =  0.7313070670209697\n",
      "MSE =  0.7343742237410468\n",
      "MSE =  0.7343742237410468\n",
      "MSE =  0.7343163699826726\n",
      "MSE =  0.7412779516351611\n",
      "MSE =  0.7343163699826726\n",
      "MSE =  0.7343742237410468\n",
      "MSE =  1.5722057823458644\n",
      "MSE =  0.8256443062991705\n",
      "MSE =  1.5722057823458644\n",
      "MSE =  0.7343163699826726\n",
      "MSE =  0.9708437364735669\n",
      "MSE =  0.7420099714259721\n",
      "MSE =  0.9708437364735669\n",
      "MSE =  0.7343163699826726\n",
      "MSE =  0.7434866150173055\n",
      "MSE =  0.812031787034956\n",
      "MSE =  0.7434866150173055\n",
      "MSE =  0.7343163699826726\n",
      "MSE =  0.7526194701642058\n",
      "MSE =  0.7342885121573827\n",
      "MSE =  0.7526194701642058\n",
      "MSE =  0.7343163699826726\n",
      "MSE =  0.7481278579419172\n",
      "MSE =  0.7414123192165283\n",
      "MSE =  0.7481278579419172\n",
      "MSE =  0.7343163699826726\n",
      "MSE =  0.7754955457206573\n",
      "MSE =  0.7580876725222504\n",
      "MSE =  0.7754955457206573\n",
      "MSE =  0.7343163699826726\n",
      "MSE =  0.735028524345244\n",
      "MSE =  0.7360114250786545\n",
      "MSE =  0.735028524345244\n",
      "MSE =  0.7343163699826726\n",
      "MSE =  0.7326290834587651\n",
      "MSE =  0.7419597240612715\n",
      "MSE =  0.7326290834587651\n",
      "MSE =  0.7343163699826726\n",
      "MSE =  0.7675566992784122\n",
      "MSE =  0.8403935658718618\n",
      "MSE =  0.7675566992784122\n",
      "MSE =  0.7326290834587651\n",
      "MSE =  0.7432824684850616\n",
      "MSE =  0.7489211502229495\n",
      "MSE =  0.7432824684850616\n",
      "MSE =  0.7326290834587651\n",
      "MSE =  0.7705959666377361\n",
      "MSE =  0.7438660217716415\n",
      "MSE =  0.7705959666377361\n",
      "MSE =  0.7326290834587651\n",
      "MSE =  0.7326290834587651\n",
      "############ Generation 10 ############\n",
      "MSE =  0.7326290834587651\n",
      "MSE =  0.7313070670209697\n",
      "最好的位置：[10.          0.18542699  0.19551375]\n",
      "MSE =  0.7313070670209697\n",
      "最大的函数值：0.7313070670209697\n",
      "MSE =  0.74014040806346\n",
      "MSE =  0.735049508044772\n",
      "MSE =  0.74014040806346\n",
      "MSE =  0.7326290834587651\n",
      "MSE =  0.7426604346131226\n",
      "MSE =  0.7408545277643127\n",
      "MSE =  0.7426604346131226\n",
      "MSE =  0.7326290834587651\n",
      "MSE =  0.7449381782646791\n",
      "MSE =  0.7357163054016724\n",
      "MSE =  0.7449381782646791\n",
      "MSE =  0.7326290834587651\n",
      "MSE =  0.7420714424911823\n",
      "MSE =  0.7368667200807105\n",
      "MSE =  0.7420714424911823\n",
      "MSE =  0.7326290834587651\n",
      "MSE =  0.7387537941126973\n",
      "MSE =  0.7621232952984958\n",
      "MSE =  0.7387537941126973\n",
      "MSE =  0.7326290834587651\n",
      "MSE =  0.7540293571501104\n",
      "MSE =  0.7329002106290825\n",
      "MSE =  0.7540293571501104\n",
      "MSE =  0.7326290834587651\n",
      "MSE =  0.7353479755271235\n",
      "MSE =  0.7321080902145521\n",
      "MSE =  0.7353479755271235\n",
      "MSE =  0.7326290834587651\n",
      "MSE =  0.7360726524165707\n",
      "MSE =  0.7313070670209697\n",
      "MSE =  0.7360726524165707\n",
      "MSE =  0.7326290834587651\n",
      "MSE =  0.7375768838243012\n",
      "MSE =  0.7343163699826726\n",
      "MSE =  0.7375768838243012\n",
      "MSE =  0.7326290834587651\n",
      "MSE =  1.5722057823458644\n",
      "MSE =  0.8256443062991705\n",
      "MSE =  1.5722057823458644\n",
      "MSE =  0.7326290834587651\n",
      "MSE =  0.7739776789515574\n",
      "MSE =  0.7420099714259721\n",
      "MSE =  0.7739776789515574\n",
      "MSE =  0.7326290834587651\n",
      "MSE =  0.7518615339804913\n",
      "MSE =  0.7434866150173055\n",
      "MSE =  0.7518615339804913\n",
      "MSE =  0.7326290834587651\n",
      "MSE =  0.7446332530016485\n",
      "MSE =  0.7342885121573827\n",
      "MSE =  0.7446332530016485\n",
      "MSE =  0.7326290834587651\n"
     ]
    },
    {
     "name": "stdout",
     "output_type": "stream",
     "text": [
      "MSE =  0.7324570306521777\n",
      "MSE =  0.7414123192165283\n",
      "MSE =  0.7324570306521777\n",
      "MSE =  0.7326290834587651\n",
      "MSE =  0.7846959072780135\n",
      "MSE =  0.7580876725222504\n",
      "MSE =  0.7846959072780135\n",
      "MSE =  0.7324570306521777\n",
      "MSE =  0.7439244693058199\n",
      "MSE =  0.735028524345244\n",
      "MSE =  0.7439244693058199\n",
      "MSE =  0.7324570306521777\n",
      "MSE =  0.735659374845727\n",
      "MSE =  0.7326290834587651\n",
      "MSE =  0.735659374845727\n",
      "MSE =  0.7324570306521777\n",
      "MSE =  0.7408513960028389\n",
      "MSE =  0.7675566992784122\n",
      "MSE =  0.7408513960028389\n",
      "MSE =  0.7324570306521777\n",
      "MSE =  0.7424406661518677\n",
      "MSE =  0.7432824684850616\n",
      "MSE =  0.7424406661518677\n",
      "MSE =  0.7324570306521777\n",
      "MSE =  1.5700522563253512\n",
      "MSE =  0.7438660217716415\n",
      "MSE =  1.5700522563253512\n",
      "MSE =  0.7324570306521777\n",
      "MSE =  0.7324570306521777\n",
      "############ Generation 11 ############\n",
      "MSE =  0.7324570306521777\n",
      "MSE =  0.7313070670209697\n",
      "最好的位置：[10.          0.18542699  0.19551375]\n",
      "MSE =  0.7313070670209697\n",
      "最大的函数值：0.7313070670209697\n",
      "MSE =  0.7494394054416145\n",
      "MSE =  0.735049508044772\n",
      "MSE =  0.7494394054416145\n",
      "MSE =  0.7324570306521777\n",
      "MSE =  1.5713040282572666\n",
      "MSE =  0.7408545277643127\n",
      "MSE =  1.5713040282572666\n",
      "MSE =  0.7324570306521777\n",
      "MSE =  0.8203011259439882\n",
      "MSE =  0.7357163054016724\n",
      "MSE =  0.8203011259439882\n",
      "MSE =  0.7324570306521777\n",
      "MSE =  0.7500312379168462\n",
      "MSE =  0.7368667200807105\n",
      "MSE =  0.7500312379168462\n",
      "MSE =  0.7324570306521777\n",
      "MSE =  0.7555024328556138\n",
      "MSE =  0.7387537941126973\n",
      "MSE =  0.7555024328556138\n",
      "MSE =  0.7324570306521777\n",
      "MSE =  0.7346937813831658\n",
      "MSE =  0.7329002106290825\n",
      "MSE =  0.7346937813831658\n",
      "MSE =  0.7324570306521777\n",
      "MSE =  0.7341821052286411\n",
      "MSE =  0.7321080902145521\n",
      "MSE =  0.7341821052286411\n",
      "MSE =  0.7324570306521777\n",
      "MSE =  0.7302991972194455\n",
      "MSE =  0.7313070670209697\n",
      "MSE =  0.7302991972194455\n",
      "MSE =  0.7324570306521777\n",
      "MSE =  0.7339425629599263\n",
      "MSE =  0.7343163699826726\n",
      "MSE =  0.7339425629599263\n",
      "MSE =  0.7302991972194455\n",
      "MSE =  1.2906005738944317\n",
      "MSE =  0.8256443062991705\n",
      "MSE =  1.2906005738944317\n",
      "MSE =  0.7302991972194455\n",
      "MSE =  1.575222976539216\n",
      "MSE =  0.7420099714259721\n",
      "MSE =  1.575222976539216\n",
      "MSE =  0.7302991972194455\n",
      "MSE =  1.5699886612233898\n",
      "MSE =  0.7434866150173055\n",
      "MSE =  1.5699886612233898\n",
      "MSE =  0.7302991972194455\n",
      "MSE =  0.7738588333511733\n",
      "MSE =  0.7342885121573827\n",
      "MSE =  0.7738588333511733\n",
      "MSE =  0.7302991972194455\n",
      "MSE =  0.7396073071979967\n",
      "MSE =  0.7324570306521777\n",
      "MSE =  0.7396073071979967\n",
      "MSE =  0.7302991972194455\n",
      "MSE =  0.7793288865427278\n",
      "MSE =  0.7580876725222504\n",
      "MSE =  0.7793288865427278\n",
      "MSE =  0.7302991972194455\n",
      "MSE =  0.7324117047775021\n",
      "MSE =  0.735028524345244\n",
      "MSE =  0.7324117047775021\n",
      "MSE =  0.7302991972194455\n",
      "MSE =  0.7337350116227902\n",
      "MSE =  0.7326290834587651\n",
      "MSE =  0.7337350116227902\n",
      "MSE =  0.7302991972194455\n",
      "MSE =  0.7404677358003728\n",
      "MSE =  0.7408513960028389\n",
      "MSE =  0.7404677358003728\n",
      "MSE =  0.7302991972194455\n",
      "MSE =  0.7383308423520192\n",
      "MSE =  0.7424406661518677\n",
      "MSE =  0.7383308423520192\n",
      "MSE =  0.7302991972194455\n",
      "MSE =  0.7342519650959354\n",
      "MSE =  0.7438660217716415\n",
      "MSE =  0.7342519650959354\n",
      "MSE =  0.7302991972194455\n",
      "MSE =  0.7302991972194455\n",
      "############ Generation 12 ############\n",
      "MSE =  0.7302991972194455\n",
      "MSE =  0.7313070670209697\n",
      "最好的位置：[10.          0.16559598  0.18422394]\n",
      "MSE =  0.7302991972194455\n",
      "最大的函数值：0.7302991972194455\n",
      "MSE =  0.7639063312317647\n",
      "MSE =  0.735049508044772\n",
      "MSE =  0.7639063312317647\n",
      "MSE =  0.7302991972194455\n",
      "MSE =  0.731881881377952\n",
      "MSE =  0.7408545277643127\n",
      "MSE =  0.731881881377952\n",
      "MSE =  0.7302991972194455\n",
      "MSE =  0.7404220464197876\n",
      "MSE =  0.7357163054016724\n",
      "MSE =  0.7404220464197876\n",
      "MSE =  0.7302991972194455\n",
      "MSE =  0.7600143213228744\n",
      "MSE =  0.7368667200807105\n",
      "MSE =  0.7600143213228744\n",
      "MSE =  0.7302991972194455\n",
      "MSE =  0.7377887590099085\n",
      "MSE =  0.7387537941126973\n",
      "MSE =  0.7377887590099085\n",
      "MSE =  0.7302991972194455\n",
      "MSE =  0.7349717042079998\n",
      "MSE =  0.7329002106290825\n",
      "MSE =  0.7349717042079998\n",
      "MSE =  0.7302991972194455\n",
      "MSE =  0.7356736834947465\n",
      "MSE =  0.7321080902145521\n",
      "MSE =  0.7356736834947465\n",
      "MSE =  0.7302991972194455\n",
      "MSE =  0.7315516929908525\n",
      "MSE =  0.7302991972194455\n",
      "MSE =  0.7315516929908525\n",
      "MSE =  0.7315516929908525\n",
      "MSE =  0.7308215910689946\n",
      "MSE =  0.7339425629599263\n",
      "MSE =  0.7308215910689946\n",
      "MSE =  0.7315516929908525\n",
      "MSE =  1.5722057823458644\n",
      "MSE =  0.8256443062991705\n",
      "MSE =  1.5722057823458644\n",
      "MSE =  0.7308215910689946\n",
      "MSE =  0.7336175748581787\n",
      "MSE =  0.7420099714259721\n",
      "MSE =  0.7336175748581787\n",
      "MSE =  0.7308215910689946\n",
      "MSE =  0.7331613595220648\n",
      "MSE =  0.7434866150173055\n",
      "MSE =  0.7331613595220648\n",
      "MSE =  0.7308215910689946\n",
      "MSE =  0.7464910784622351\n",
      "MSE =  0.7342885121573827\n",
      "MSE =  0.7464910784622351\n",
      "MSE =  0.7308215910689946\n",
      "MSE =  0.7322881197182272\n",
      "MSE =  0.7324570306521777\n",
      "MSE =  0.7322881197182272\n",
      "MSE =  0.7308215910689946\n",
      "MSE =  0.7301269363691899\n",
      "MSE =  0.7580876725222504\n",
      "MSE =  0.7301269363691899\n",
      "MSE =  0.7308215910689946\n",
      "MSE =  0.7354381922397405\n",
      "MSE =  0.7324117047775021\n",
      "MSE =  0.7354381922397405\n",
      "MSE =  0.7301269363691899\n",
      "MSE =  0.7331804238290927\n",
      "MSE =  0.7326290834587651\n",
      "MSE =  0.7331804238290927\n",
      "MSE =  0.7301269363691899\n",
      "MSE =  0.73552764117016\n",
      "MSE =  0.7404677358003728\n",
      "MSE =  0.73552764117016\n",
      "MSE =  0.7301269363691899\n",
      "MSE =  0.7334732305602206\n",
      "MSE =  0.7383308423520192\n",
      "MSE =  0.7334732305602206\n",
      "MSE =  0.7301269363691899\n",
      "MSE =  0.7365893437026036\n",
      "MSE =  0.7342519650959354\n",
      "MSE =  0.7365893437026036\n",
      "MSE =  0.7301269363691899\n",
      "MSE =  0.7301269363691899\n",
      "############ Generation 13 ############\n",
      "MSE =  0.7301269363691899\n",
      "MSE =  0.7302991972194455\n",
      "最好的位置：[10.          0.1538171   0.18240413]\n",
      "MSE =  0.7301269363691899\n",
      "最大的函数值：0.7301269363691899\n",
      "MSE =  0.740577715759692\n",
      "MSE =  0.735049508044772\n",
      "MSE =  0.740577715759692\n",
      "MSE =  0.7301269363691899\n",
      "MSE =  0.7374360590086403\n",
      "MSE =  0.731881881377952\n",
      "MSE =  0.7374360590086403\n",
      "MSE =  0.7301269363691899\n",
      "MSE =  0.7368286366802734\n",
      "MSE =  0.7357163054016724\n",
      "MSE =  0.7368286366802734\n",
      "MSE =  0.7301269363691899\n",
      "MSE =  1.5717397696364181\n",
      "MSE =  0.7368667200807105\n",
      "MSE =  1.5717397696364181\n",
      "MSE =  0.7301269363691899\n",
      "MSE =  0.7339217774401754\n",
      "MSE =  0.7377887590099085\n",
      "MSE =  0.7339217774401754\n",
      "MSE =  0.7301269363691899\n",
      "MSE =  0.7511029663794045\n",
      "MSE =  0.7329002106290825\n",
      "MSE =  0.7511029663794045\n",
      "MSE =  0.7301269363691899\n",
      "MSE =  0.736261147924952\n",
      "MSE =  0.7321080902145521\n",
      "MSE =  0.736261147924952\n",
      "MSE =  0.7301269363691899\n",
      "MSE =  0.7325950259133855\n",
      "MSE =  0.7302991972194455\n",
      "MSE =  0.7325950259133855\n",
      "MSE =  0.7301269363691899\n",
      "MSE =  0.7316557327799864\n",
      "MSE =  0.7308215910689946\n",
      "MSE =  0.7316557327799864\n",
      "MSE =  0.7301269363691899\n",
      "MSE =  0.7804368152553197\n",
      "MSE =  0.8256443062991705\n",
      "MSE =  0.7804368152553197\n",
      "MSE =  0.7301269363691899\n",
      "MSE =  0.7396997427871068\n",
      "MSE =  0.7336175748581787\n",
      "MSE =  0.7396997427871068\n",
      "MSE =  0.7301269363691899\n",
      "MSE =  0.7336945849112346\n",
      "MSE =  0.7331613595220648\n",
      "MSE =  0.7336945849112346\n",
      "MSE =  0.7301269363691899\n",
      "MSE =  0.7416083818650894\n",
      "MSE =  0.7342885121573827\n",
      "MSE =  0.7416083818650894\n",
      "MSE =  0.7301269363691899\n",
      "MSE =  0.7314359518027447\n",
      "MSE =  0.7322881197182272\n",
      "MSE =  0.7314359518027447\n",
      "MSE =  0.7301269363691899\n",
      "MSE =  0.7625045559610382\n",
      "MSE =  0.7301269363691899\n",
      "MSE =  0.7625045559610382\n",
      "MSE =  0.7625045559610382\n",
      "MSE =  0.74299920979334\n",
      "MSE =  0.7324117047775021\n",
      "MSE =  0.74299920979334\n",
      "MSE =  0.7625045559610382\n",
      "MSE =  0.7641692894510013\n",
      "MSE =  0.7326290834587651\n",
      "MSE =  0.7641692894510013\n",
      "MSE =  0.74299920979334\n",
      "MSE =  0.7415196827905174\n",
      "MSE =  0.73552764117016\n",
      "MSE =  0.7415196827905174\n",
      "MSE =  0.74299920979334\n",
      "MSE =  0.7481012450420683\n",
      "MSE =  0.7334732305602206\n",
      "MSE =  0.7481012450420683\n",
      "MSE =  0.7415196827905174\n",
      "MSE =  1.573726422548647\n",
      "MSE =  0.7342519650959354\n",
      "MSE =  1.573726422548647\n",
      "MSE =  0.7415196827905174\n",
      "MSE =  0.7415196827905174\n",
      "############ Generation 14 ############\n",
      "MSE =  0.7415196827905174\n",
      "MSE =  0.7301269363691899\n",
      "最好的位置：[10.          0.1538171   0.18240413]\n",
      "MSE =  0.7301269363691899\n",
      "最大的函数值：0.7301269363691899\n",
      "MSE =  1.5992916419301773\n",
      "MSE =  0.735049508044772\n",
      "MSE =  1.5992916419301773\n",
      "MSE =  0.7415196827905174\n",
      "MSE =  0.7316435171282394\n",
      "MSE =  0.731881881377952\n",
      "MSE =  0.7316435171282394\n",
      "MSE =  0.7415196827905174\n",
      "MSE =  0.7361636881331642\n",
      "MSE =  0.7357163054016724\n",
      "MSE =  0.7361636881331642\n",
      "MSE =  0.7316435171282394\n",
      "MSE =  0.7339653678600009\n",
      "MSE =  0.7368667200807105\n",
      "MSE =  0.7339653678600009\n",
      "MSE =  0.7316435171282394\n"
     ]
    },
    {
     "name": "stdout",
     "output_type": "stream",
     "text": [
      "MSE =  0.7318136936153021\n",
      "MSE =  0.7339217774401754\n",
      "MSE =  0.7318136936153021\n",
      "MSE =  0.7316435171282394\n",
      "MSE =  0.7328367978656943\n",
      "MSE =  0.7329002106290825\n",
      "MSE =  0.7328367978656943\n",
      "MSE =  0.7316435171282394\n",
      "MSE =  0.7328929278931712\n",
      "MSE =  0.7321080902145521\n",
      "MSE =  0.7328929278931712\n",
      "MSE =  0.7316435171282394\n",
      "MSE =  0.731685262784038\n",
      "MSE =  0.7302991972194455\n",
      "MSE =  0.731685262784038\n",
      "MSE =  0.7316435171282394\n",
      "MSE =  0.7320446114429858\n",
      "MSE =  0.7308215910689946\n",
      "MSE =  0.7320446114429858\n",
      "MSE =  0.7316435171282394\n",
      "MSE =  0.7325465436253371\n",
      "MSE =  0.7804368152553197\n",
      "MSE =  0.7325465436253371\n",
      "MSE =  0.7316435171282394\n",
      "MSE =  0.7313622285467097\n",
      "MSE =  0.7336175748581787\n",
      "MSE =  0.7313622285467097\n",
      "MSE =  0.7316435171282394\n",
      "MSE =  0.7678741213273071\n",
      "MSE =  0.7331613595220648\n",
      "MSE =  0.7678741213273071\n",
      "MSE =  0.7313622285467097\n",
      "MSE =  0.7797257103042979\n",
      "MSE =  0.7342885121573827\n",
      "MSE =  0.7797257103042979\n",
      "MSE =  0.7313622285467097\n",
      "MSE =  0.730287940488231\n",
      "MSE =  0.7314359518027447\n",
      "MSE =  0.730287940488231\n",
      "MSE =  0.7313622285467097\n",
      "MSE =  0.7316944065220712\n",
      "MSE =  0.7301269363691899\n",
      "MSE =  0.7316944065220712\n",
      "MSE =  0.730287940488231\n",
      "MSE =  0.7316454358963892\n",
      "MSE =  0.7324117047775021\n",
      "MSE =  0.7316454358963892\n",
      "MSE =  0.730287940488231\n",
      "MSE =  0.7342682612875739\n",
      "MSE =  0.7326290834587651\n",
      "MSE =  0.7342682612875739\n",
      "MSE =  0.730287940488231\n",
      "MSE =  0.7424064880685309\n",
      "MSE =  0.73552764117016\n",
      "MSE =  0.7424064880685309\n",
      "MSE =  0.730287940488231\n",
      "MSE =  0.7303610496386227\n",
      "MSE =  0.7334732305602206\n",
      "MSE =  0.7303610496386227\n",
      "MSE =  0.730287940488231\n",
      "MSE =  0.7444206385813045\n",
      "MSE =  0.7342519650959354\n",
      "MSE =  0.7444206385813045\n",
      "MSE =  0.730287940488231\n",
      "MSE =  0.730287940488231\n",
      "############ Generation 15 ############\n",
      "MSE =  0.730287940488231\n",
      "MSE =  0.7301269363691899\n",
      "最好的位置：[10.          0.1538171   0.18240413]\n",
      "MSE =  0.7301269363691899\n",
      "最大的函数值：0.7301269363691899\n",
      "MSE =  0.7522518518364933\n",
      "MSE =  0.735049508044772\n",
      "MSE =  0.7522518518364933\n",
      "MSE =  0.730287940488231\n",
      "MSE =  0.7320734480923554\n",
      "MSE =  0.7316435171282394\n",
      "MSE =  0.7320734480923554\n",
      "MSE =  0.730287940488231\n",
      "MSE =  0.7357559496790561\n",
      "MSE =  0.7357163054016724\n",
      "MSE =  0.7357559496790561\n",
      "MSE =  0.730287940488231\n",
      "MSE =  0.7365093896617293\n",
      "MSE =  0.7339653678600009\n",
      "MSE =  0.7365093896617293\n",
      "MSE =  0.730287940488231\n",
      "MSE =  0.7307138588761765\n",
      "MSE =  0.7318136936153021\n",
      "MSE =  0.7307138588761765\n",
      "MSE =  0.730287940488231\n",
      "MSE =  0.7356273384905919\n",
      "MSE =  0.7328367978656943\n",
      "MSE =  0.7356273384905919\n",
      "MSE =  0.730287940488231\n",
      "MSE =  0.7324501253397419\n",
      "MSE =  0.7321080902145521\n",
      "MSE =  0.7324501253397419\n",
      "MSE =  0.730287940488231\n",
      "MSE =  0.731930795286167\n",
      "MSE =  0.7302991972194455\n",
      "MSE =  0.731930795286167\n",
      "MSE =  0.730287940488231\n",
      "MSE =  0.7302888519294216\n",
      "MSE =  0.7308215910689946\n",
      "MSE =  0.7302888519294216\n",
      "MSE =  0.730287940488231\n",
      "MSE =  0.7331036298882075\n",
      "MSE =  0.7325465436253371\n",
      "MSE =  0.7331036298882075\n",
      "MSE =  0.730287940488231\n",
      "MSE =  0.7333613061257859\n",
      "MSE =  0.7313622285467097\n",
      "MSE =  0.7333613061257859\n",
      "MSE =  0.730287940488231\n",
      "MSE =  0.7422783247753671\n",
      "MSE =  0.7331613595220648\n",
      "MSE =  0.7422783247753671\n",
      "MSE =  0.730287940488231\n",
      "MSE =  0.7400604930241482\n",
      "MSE =  0.7342885121573827\n",
      "MSE =  0.7400604930241482\n",
      "MSE =  0.730287940488231\n",
      "MSE =  0.7303465563396824\n",
      "MSE =  0.730287940488231\n",
      "MSE =  0.7303465563396824\n",
      "MSE =  0.7303465563396824\n",
      "MSE =  0.7308363520714238\n",
      "MSE =  0.7301269363691899\n",
      "MSE =  0.7308363520714238\n",
      "MSE =  0.7303465563396824\n",
      "MSE =  0.7344476255951834\n",
      "MSE =  0.7316454358963892\n",
      "MSE =  0.7344476255951834\n",
      "MSE =  0.7303465563396824\n",
      "MSE =  0.7386198066519081\n",
      "MSE =  0.7326290834587651\n",
      "MSE =  0.7386198066519081\n",
      "MSE =  0.7303465563396824\n",
      "MSE =  0.7356343618649311\n",
      "MSE =  0.73552764117016\n",
      "MSE =  0.7356343618649311\n",
      "MSE =  0.7303465563396824\n",
      "MSE =  0.7337592785737791\n",
      "MSE =  0.7303610496386227\n",
      "MSE =  0.7337592785737791\n",
      "MSE =  0.7303465563396824\n",
      "MSE =  0.7338123511280582\n",
      "MSE =  0.7342519650959354\n",
      "MSE =  0.7338123511280582\n",
      "MSE =  0.7303465563396824\n",
      "MSE =  0.7303465563396824\n",
      "############ Generation 16 ############\n",
      "MSE =  0.7303465563396824\n",
      "MSE =  0.7301269363691899\n",
      "最好的位置：[10.          0.1538171   0.18240413]\n",
      "MSE =  0.7301269363691899\n",
      "最大的函数值：0.7301269363691899\n",
      "MSE =  0.8013583312021387\n",
      "MSE =  0.735049508044772\n",
      "MSE =  0.8013583312021387\n",
      "MSE =  0.7303465563396824\n",
      "MSE =  0.7304331057576199\n",
      "MSE =  0.7316435171282394\n",
      "MSE =  0.7304331057576199\n",
      "MSE =  0.7303465563396824\n",
      "MSE =  0.7617704610821702\n",
      "MSE =  0.7357163054016724\n",
      "MSE =  0.7617704610821702\n",
      "MSE =  0.7303465563396824\n",
      "MSE =  0.7316583467092864\n",
      "MSE =  0.7339653678600009\n",
      "MSE =  0.7316583467092864\n",
      "MSE =  0.7303465563396824\n",
      "MSE =  0.7301728183231969\n",
      "MSE =  0.7307138588761765\n",
      "MSE =  0.7301728183231969\n",
      "MSE =  0.7303465563396824\n",
      "MSE =  0.7358508878315079\n",
      "MSE =  0.7328367978656943\n",
      "MSE =  0.7358508878315079\n",
      "MSE =  0.7301728183231969\n",
      "MSE =  0.7312568190888539\n",
      "MSE =  0.7321080902145521\n",
      "MSE =  0.7312568190888539\n",
      "MSE =  0.7301728183231969\n",
      "MSE =  0.7311129711257538\n",
      "MSE =  0.7302991972194455\n",
      "MSE =  0.7311129711257538\n",
      "MSE =  0.7301728183231969\n",
      "MSE =  0.7316592077496246\n",
      "MSE =  0.7302888519294216\n",
      "MSE =  0.7316592077496246\n",
      "MSE =  0.7301728183231969\n",
      "MSE =  0.7324982725048633\n",
      "MSE =  0.7325465436253371\n",
      "MSE =  0.7324982725048633\n",
      "MSE =  0.7301728183231969\n",
      "MSE =  0.7321879248667297\n",
      "MSE =  0.7313622285467097\n",
      "MSE =  0.7321879248667297\n",
      "MSE =  0.7301728183231969\n",
      "MSE =  1.5752011309110343\n",
      "MSE =  0.7331613595220648\n",
      "MSE =  1.5752011309110343\n",
      "MSE =  0.7301728183231969\n",
      "MSE =  0.7307421766012122\n",
      "MSE =  0.7342885121573827\n",
      "MSE =  0.7307421766012122\n",
      "MSE =  0.7301728183231969\n",
      "MSE =  0.7307896005535829\n",
      "MSE =  0.730287940488231\n",
      "MSE =  0.7307896005535829\n",
      "MSE =  0.7301728183231969\n",
      "MSE =  0.731159891566869\n",
      "MSE =  0.7301269363691899\n",
      "MSE =  0.731159891566869\n",
      "MSE =  0.7301728183231969\n",
      "MSE =  0.737483736147057\n",
      "MSE =  0.7316454358963892\n",
      "MSE =  0.737483736147057\n",
      "MSE =  0.7301728183231969\n",
      "MSE =  0.732623690893768\n",
      "MSE =  0.7326290834587651\n",
      "MSE =  0.732623690893768\n",
      "MSE =  0.7301728183231969\n",
      "MSE =  0.7416586012679273\n",
      "MSE =  0.73552764117016\n",
      "MSE =  0.7416586012679273\n",
      "MSE =  0.7301728183231969\n",
      "MSE =  0.7342376257157982\n",
      "MSE =  0.7303610496386227\n",
      "MSE =  0.7342376257157982\n",
      "MSE =  0.7301728183231969\n",
      "MSE =  0.7368683921481919\n",
      "MSE =  0.7338123511280582\n",
      "MSE =  0.7368683921481919\n",
      "MSE =  0.7301728183231969\n",
      "MSE =  0.7301728183231969\n",
      "############ Generation 17 ############\n",
      "MSE =  0.7301728183231969\n",
      "MSE =  0.7301269363691899\n",
      "最好的位置：[10.          0.1538171   0.18240413]\n",
      "MSE =  0.7301269363691899\n",
      "最大的函数值：0.7301269363691899\n",
      "MSE =  1.608672952017692\n",
      "MSE =  0.735049508044772\n",
      "MSE =  1.608672952017692\n",
      "MSE =  0.7301728183231969\n",
      "MSE =  0.7306627029914278\n",
      "MSE =  0.7304331057576199\n",
      "MSE =  0.7306627029914278\n",
      "MSE =  0.7301728183231969\n",
      "MSE =  0.7712397850037936\n",
      "MSE =  0.7357163054016724\n",
      "MSE =  0.7712397850037936\n",
      "MSE =  0.7301728183231969\n",
      "MSE =  0.7345630700621159\n",
      "MSE =  0.7316583467092864\n",
      "MSE =  0.7345630700621159\n",
      "MSE =  0.7301728183231969\n",
      "MSE =  0.7303570219438114\n",
      "MSE =  0.7301728183231969\n",
      "MSE =  0.7303570219438114\n",
      "MSE =  0.7303570219438114\n",
      "MSE =  0.731929100139232\n",
      "MSE =  0.7328367978656943\n",
      "MSE =  0.731929100139232\n",
      "MSE =  0.7303570219438114\n",
      "MSE =  0.731525850394498\n",
      "MSE =  0.7312568190888539\n",
      "MSE =  0.731525850394498\n",
      "MSE =  0.7303570219438114\n",
      "MSE =  0.7309065314369848\n",
      "MSE =  0.7302991972194455\n",
      "MSE =  0.7309065314369848\n",
      "MSE =  0.7303570219438114\n",
      "MSE =  0.7301612985921836\n",
      "MSE =  0.7302888519294216\n",
      "MSE =  0.7301612985921836\n",
      "MSE =  0.7303570219438114\n",
      "MSE =  0.7324110735092626\n",
      "MSE =  0.7324982725048633\n",
      "MSE =  0.7324110735092626\n",
      "MSE =  0.7301612985921836\n",
      "MSE =  0.7329302414542644\n",
      "MSE =  0.7313622285467097\n",
      "MSE =  0.7329302414542644\n",
      "MSE =  0.7301612985921836\n",
      "MSE =  0.740971792003524\n",
      "MSE =  0.7331613595220648\n",
      "MSE =  0.740971792003524\n",
      "MSE =  0.7301612985921836\n",
      "MSE =  0.7329002964398935\n",
      "MSE =  0.7307421766012122\n",
      "MSE =  0.7329002964398935\n",
      "MSE =  0.7301612985921836\n",
      "MSE =  0.730134328427663\n",
      "MSE =  0.730287940488231\n",
      "MSE =  0.730134328427663\n",
      "MSE =  0.7301612985921836\n",
      "MSE =  0.7310616896073061\n",
      "MSE =  0.7301269363691899\n",
      "MSE =  0.7310616896073061\n",
      "MSE =  0.730134328427663\n",
      "MSE =  0.7304017281761687\n",
      "MSE =  0.7316454358963892\n",
      "MSE =  0.7304017281761687\n",
      "MSE =  0.730134328427663\n",
      "MSE =  0.7321024472027456\n",
      "MSE =  0.732623690893768\n",
      "MSE =  0.7321024472027456\n",
      "MSE =  0.730134328427663\n",
      "MSE =  0.7304931762037734\n"
     ]
    },
    {
     "name": "stdout",
     "output_type": "stream",
     "text": [
      "MSE =  0.73552764117016\n",
      "MSE =  0.7304931762037734\n",
      "MSE =  0.730134328427663\n",
      "MSE =  0.7307272355520695\n",
      "MSE =  0.7303610496386227\n",
      "MSE =  0.7307272355520695\n",
      "MSE =  0.730134328427663\n",
      "MSE =  0.7347574053923798\n",
      "MSE =  0.7338123511280582\n",
      "MSE =  0.7347574053923798\n",
      "MSE =  0.730134328427663\n",
      "MSE =  0.730134328427663\n",
      "############ Generation 18 ############\n",
      "MSE =  0.730134328427663\n",
      "MSE =  0.7301269363691899\n",
      "最好的位置：[10.          0.1538171   0.18240413]\n",
      "MSE =  0.7301269363691899\n",
      "最大的函数值：0.7301269363691899\n",
      "MSE =  0.8054192812743366\n",
      "MSE =  0.735049508044772\n",
      "MSE =  0.8054192812743366\n",
      "MSE =  0.730134328427663\n",
      "MSE =  0.7300293567938666\n",
      "MSE =  0.7304331057576199\n",
      "MSE =  0.7300293567938666\n",
      "MSE =  0.730134328427663\n",
      "MSE =  0.7413018011495403\n",
      "MSE =  0.7357163054016724\n",
      "MSE =  0.7413018011495403\n",
      "MSE =  0.7300293567938666\n",
      "MSE =  0.7320077168436872\n",
      "MSE =  0.7316583467092864\n",
      "MSE =  0.7320077168436872\n",
      "MSE =  0.7300293567938666\n",
      "MSE =  0.7302766100393522\n",
      "MSE =  0.7301728183231969\n",
      "MSE =  0.7302766100393522\n",
      "MSE =  0.7300293567938666\n",
      "MSE =  0.7353525546590315\n",
      "MSE =  0.731929100139232\n",
      "MSE =  0.7353525546590315\n",
      "MSE =  0.7300293567938666\n",
      "MSE =  0.7327585435149222\n",
      "MSE =  0.7312568190888539\n",
      "MSE =  0.7327585435149222\n",
      "MSE =  0.7300293567938666\n",
      "MSE =  0.7304239692779773\n",
      "MSE =  0.7302991972194455\n",
      "MSE =  0.7304239692779773\n",
      "MSE =  0.7300293567938666\n",
      "MSE =  0.7305978944654026\n",
      "MSE =  0.7301612985921836\n",
      "MSE =  0.7305978944654026\n",
      "MSE =  0.7300293567938666\n",
      "MSE =  0.7301887006028761\n",
      "MSE =  0.7324110735092626\n",
      "MSE =  0.7301887006028761\n",
      "MSE =  0.7300293567938666\n",
      "MSE =  0.7331690688791439\n",
      "MSE =  0.7313622285467097\n",
      "MSE =  0.7331690688791439\n",
      "MSE =  0.7300293567938666\n",
      "MSE =  0.7365867135061539\n",
      "MSE =  0.7331613595220648\n",
      "MSE =  0.7365867135061539\n",
      "MSE =  0.7300293567938666\n",
      "MSE =  0.7300024744159499\n",
      "MSE =  0.7307421766012122\n",
      "MSE =  0.7300024744159499\n",
      "MSE =  0.7300293567938666\n",
      "MSE =  0.7302610095571265\n",
      "MSE =  0.730134328427663\n",
      "MSE =  0.7302610095571265\n",
      "MSE =  0.7300024744159499\n",
      "MSE =  0.7302542039845616\n",
      "MSE =  0.7301269363691899\n",
      "MSE =  0.7302542039845616\n",
      "MSE =  0.7300024744159499\n",
      "MSE =  0.7332959789286804\n",
      "MSE =  0.7304017281761687\n",
      "MSE =  0.7332959789286804\n",
      "MSE =  0.7300024744159499\n",
      "MSE =  0.7311872648748083\n",
      "MSE =  0.7321024472027456\n",
      "MSE =  0.7311872648748083\n",
      "MSE =  0.7300024744159499\n",
      "MSE =  0.7336738344982402\n",
      "MSE =  0.7304931762037734\n",
      "MSE =  0.7336738344982402\n",
      "MSE =  0.7300024744159499\n",
      "MSE =  0.7308671147283624\n",
      "MSE =  0.7303610496386227\n",
      "MSE =  0.7308671147283624\n",
      "MSE =  0.7300024744159499\n",
      "MSE =  0.7326700350075908\n",
      "MSE =  0.7338123511280582\n",
      "MSE =  0.7326700350075908\n",
      "MSE =  0.7300024744159499\n",
      "MSE =  0.7300024744159499\n",
      "############ Generation 19 ############\n",
      "MSE =  0.7300024744159499\n",
      "MSE =  0.7301269363691899\n",
      "最好的位置：[10.          0.15755774  0.18347133]\n",
      "MSE =  0.7300024744159499\n",
      "最大的函数值：0.7300024744159499\n",
      "MSE =  1.579262165062155\n",
      "MSE =  0.735049508044772\n",
      "MSE =  1.579262165062155\n",
      "MSE =  0.7300024744159499\n",
      "MSE =  0.7305487471671545\n",
      "MSE =  0.7300293567938666\n",
      "MSE =  0.7305487471671545\n",
      "MSE =  0.7300024744159499\n",
      "MSE =  0.7331934978954159\n",
      "MSE =  0.7357163054016724\n",
      "MSE =  0.7331934978954159\n",
      "MSE =  0.7300024744159499\n",
      "MSE =  0.731631904047013\n",
      "MSE =  0.7316583467092864\n",
      "MSE =  0.731631904047013\n",
      "MSE =  0.7300024744159499\n",
      "MSE =  0.730274481175619\n",
      "MSE =  0.7301728183231969\n",
      "MSE =  0.730274481175619\n",
      "MSE =  0.7300024744159499\n",
      "MSE =  0.7311305098194225\n",
      "MSE =  0.731929100139232\n",
      "MSE =  0.7311305098194225\n",
      "MSE =  0.7300024744159499\n",
      "MSE =  0.7320196858741105\n",
      "MSE =  0.7312568190888539\n",
      "MSE =  0.7320196858741105\n",
      "MSE =  0.7300024744159499\n",
      "MSE =  0.7303552320411869\n",
      "MSE =  0.7302991972194455\n",
      "MSE =  0.7303552320411869\n",
      "MSE =  0.7300024744159499\n",
      "MSE =  0.7303299928043149\n",
      "MSE =  0.7301612985921836\n",
      "MSE =  0.7303299928043149\n",
      "MSE =  0.7300024744159499\n",
      "MSE =  0.7307695677258241\n",
      "MSE =  0.7301887006028761\n",
      "MSE =  0.7307695677258241\n",
      "MSE =  0.7300024744159499\n",
      "MSE =  0.7366289603592832\n",
      "MSE =  0.7313622285467097\n",
      "MSE =  0.7366289603592832\n",
      "MSE =  0.7300024744159499\n",
      "MSE =  0.7421457884366447\n",
      "MSE =  0.7331613595220648\n",
      "MSE =  0.7421457884366447\n",
      "MSE =  0.7300024744159499\n",
      "MSE =  0.7315706426743984\n",
      "MSE =  0.7300024744159499\n",
      "MSE =  0.7315706426743984\n",
      "MSE =  0.7315706426743984\n",
      "MSE =  0.7316413309876868\n",
      "MSE =  0.730134328427663\n",
      "MSE =  0.7316413309876868\n",
      "MSE =  0.7315706426743984\n",
      "MSE =  0.7310617505538433\n",
      "MSE =  0.7301269363691899\n",
      "MSE =  0.7310617505538433\n",
      "MSE =  0.7315706426743984\n",
      "MSE =  0.7316382159311181\n",
      "MSE =  0.7304017281761687\n",
      "MSE =  0.7316382159311181\n",
      "MSE =  0.7310617505538433\n",
      "MSE =  0.7313047931410064\n",
      "MSE =  0.7311872648748083\n",
      "MSE =  0.7313047931410064\n",
      "MSE =  0.7310617505538433\n",
      "MSE =  0.7322689592560703\n",
      "MSE =  0.7304931762037734\n",
      "MSE =  0.7322689592560703\n",
      "MSE =  0.7310617505538433\n",
      "MSE =  0.7311626470536922\n",
      "MSE =  0.7303610496386227\n",
      "MSE =  0.7311626470536922\n",
      "MSE =  0.7310617505538433\n",
      "MSE =  0.731712847587274\n",
      "MSE =  0.7326700350075908\n",
      "MSE =  0.731712847587274\n",
      "MSE =  0.7310617505538433\n",
      "MSE =  0.7310617505538433\n",
      "############ Generation 20 ############\n",
      "MSE =  0.7310617505538433\n",
      "MSE =  0.7300024744159499\n",
      "最好的位置：[10.          0.15755774  0.18347133]\n",
      "MSE =  0.7300024744159499\n",
      "最大的函数值：0.7300024744159499\n",
      "---- End of (successful) Searching ----\n"
     ]
    },
    {
     "data": {
      "image/png": "iVBORw0KGgoAAAANSUhEUgAABEsAAAKACAYAAABkJ/Y2AAAAOXRFWHRTb2Z0d2FyZQBNYXRwbG90bGliIHZlcnNpb24zLjUuMiwgaHR0cHM6Ly9tYXRwbG90bGliLm9yZy8qNh9FAAAACXBIWXMAAAsTAAALEwEAmpwYAABohUlEQVR4nO3dd5zV1Z3/8dedygy9944eQaxYAXtBiCXVbLKmZ5OYsonRZLNr9pfdZDeJ2fRqmmvapmoSC9gr2EcUUTwWOtJ7nWHm3t8f9w5ckTYwM9+5976ej8c87v3W+7kcvgpvTkllMhkkSZIkSZKUVZZ0AZIkSZIkSR2JYYkkSZIkSVIewxJJkiRJkqQ8hiWSJEmSJEl5DEskSZIkSZLyGJZIkiRJkiTlqUi6AEmSpAMJISwEhuftqgPuAxpjjP+WQD0VwFXACTHGd7f350uSpLZlWCJJkgrFJTHG25IuIoTwFuCbQFfgoYTLkSRJbcBhOJIkSXlCCKkDnNIL+BTw43YoR5IkJcCeJZIkqSCFEG4E1sQYr8ltXwH8P2Ag8FPg7cAnY4y3hRAeAP4SY/xh7txPAm+PMZ4dQjgb+AtwHfBlYGoI4RHgG8C7gHrguhjjjwBijL/M3eOUdvqqkiSpndmzRJIkFbwQwsnA9cCngUHAdl4/x8mBdAH6AoOBJ4GvA8fnfi4FvhxCOLX1KpYkSR2ZPUskSVKhuDWE0Pz+W3sc+wDwfzHGGQAhhP9HdqjMwaoC/jvGuDE3DOejwOkxxuXA8hDC34CLgccPo35JklQgDEskSVKheN0Er7lhOM1GAPc2b8QYMyGEDS2494YY48bc+75ALfBsXjgDcEML65UkSQXKsESSJBWD9cDQ5o0QQidgQN7xLWSH2jTrscf16bz3a4GdwFExxvmtW6YkSSoEhiWSJKkY/B34WQjhZmAO8DUgf1WbZ4BLQwjfBjoD7wGW7+1GMcamEMKfgP8JIXyKbNByPvBIjHFF230FSZLUUTjBqyRJKgZ/Br6fe43As8AaYGvu+HeAzcB84G/AnQe436fIThL7XO6ad+W2JUlSCUhlMpmka5AkSWpVIYSeZMOSUTHGRUnXI0mSCothiSRJKnghhKOAkcDDQC+yPUm6xRgvSLQwSZJUkByGI0mSikEZ8F/AKuBRsvOMvDvRiiRJUsGyZ4kkSZIkSVIee5ZIkiRJkiTlKamlg+vq6qqBk8kuFdiUcDmSJEmSJCk55cBA4MkJEybU5x8oqbCEbFDycNJFSJIkSZKkDuMMYGb+jlILS5YDHHnkkVRVVSVdS4vNnTuX8ePHJ12G2ontXTps69Jie5cO27q02N6lw7YuHbZ18WtoaOCll16CXFaQr9TCkiaAqqoqqqurk67lkBRq3To0tnfpsK1Li+1dOmzr0mJ7lw7bunTY1iXjDdN0OMGrJEmSJElSHsMSSZIkSZKkPIYlkiRJkiRJeQxLJEmSJEmS8hiWSJIkSZIk5TEskSRJkiRJymNYIkmSJEmSlMewRJIkSZIkKY9hiSRJkiRJUh7DEkmSJEmSpDyGJZIkSZIkSXkMSyRJkiRJkvIYlkiSJEmSJOUxLJEkSZIkScpjWCJJkiRJkpTHsESSJEmSJCmPYYkkSZIkSVKeiiQ+NIRwOXAd0AR8NcZ4Q96xabljtcDvYoz/L7f/y8Cbga7AN2OMP8rtfx6ozl3+UIzxg+31PSRJkiRJUvFp97AkhNAV+BZwGtmw5JkQwq0xxtUhhO7Az4BJwArg/hDC3THGh3PbxwF9gLkhhL/HGJcC1THGMe39PSRJkiRJUnFKYhjOFODBGOOyGOMK4D7gvNyxI4FFMcZFMcZ64CbgQoAY449jjJkY42pgKdA7d02mfcuXJEmSJEnFLIlhOEOBRXnbS4GBuffzgSNCCGOAJcC5udddQgjnAl3I9i7pDPQPIczP3fPzMcYnD1TA3LlzD/tLJKWuri7pEtSObO/SYVuXFtu7dNjWpcX2Lh22demwrUtXEmFJFZDO206THY5DjHFtCOFK4G/AemAOsKH5xBDC+4BrgctijE3AVqBb7tg7gJvJhjH7NX78eKqrqw90WoeSyWR4+umnmTBhQtKlqJ3U1dXZ3iXCti4ttnfpsK1Li+1dOmzr0mFbF7/6+vp9dqZIYhjOcmBw3vYQ8nqPxBhvijGOjzGeQXaIzQsAIYTPAe8EJsYY5+150xjjn4GaEEKPNqw9MR/646O887ZX2Fq/M+lSJEmSJEkqakmEJXcBU0II/UIIA4CJuX0ANIcdIYQJZOc3uSmEMBR4L9keJWvyzu0eQuiTez8VWBtj3NBeX6Q9vbRqEws2NTBzweqkS5EkSZIkqai1e1iSm9T1WuBRYBZwNXBhCOGa3Cm/CiEsAn4JXBFj3AEcDYwE5oUQXsn9fAjoBTweQngV+CJweTt/nXZz+oi+AMxasCrhSiRJkiRJKm5JzFlCjPFG4MZ9HLtsL/vuIDup696MbrXCOrBJI/vy7QcNSyRJkiRJamtJDMPRIZg0sh8Ajy1aQ0NjU8LVSJIkSZJUvAxLCkTfLp0Y0a2KHY1NPL1sXdLlSJIkSZJUtAxLCshxfWsBmDXfoTiSJEmSJLUVw5IC0hyWzHTeEkmSJEmS2oxhSQE5oV+uZ8mC1aTTmYSrkSRJkiSpOBmWFJBBnSsZ2K2Gtdvqias3JV2OJEmSJElFybCkgKRSqV2r4jgUR5IkSZKktmFYUmDOaA5LnORVkiRJkqQ2YVhSYJp7lsyyZ4kkSZIkSW3CsKTAHDOwB12rK1mwbgvLNm5LuhxJkiRJkoqOYUmBqSgv47ThfQB7l0iSJEmS1BYMSwrQGaOct0SSJEmSpLZiWFKAnLdEkiRJkqS2Y1hSgE4Z1oeKshRzlm9g4/aGpMuRJEmSJKmoGJYUoNqqCiYM6U06k+GxRWuSLkeSJEmSpKJiWFKgJjfPW7JgZcKVSJIkSZJUXAxLCtTueUtWJ1yJJEmSJEnFxbCkQE0a0ReAxxetoaGxKeFqJEmSJEkqHoYlBapPl06M7d+dHY1N1C1dl3Q5kiRJkiQVDcOSAjZpZLZ3iUsIS5IkSZLUegxLCljzvCUzDUskSZIkSWo1hiUFbHIuLHlkwWrS6UzC1UiSJEmSVBwMSwrYyF5dGNSthrXb6nlx1caky5EkSZIkqSgYlhSwVCrlUBxJkiRJklqZYUmBax6KM2vB6oQrkSRJkiSpOBiWFLjJo5p7lqxMuBJJkiRJkoqDYUmBO2ZgD7pWV7Jw3VaWbtiadDmSJEmSJBU8w5ICV15Wxukj+gIOxZEkSZIkqTUYlhSBySObwxIneZUkSZIk6XAZlhSByaP6A66II0mSJElSazAsKQInD+1NZXkZc5avZ+P2hqTLkSRJkiSpoBmWFIHaqgomDOlFJgOPLnLeEkmSJEmSDodhSZGYPDK7hLDzlkiSJEmSdHgMS4rEpFxYMnO+YYkkSZIkSYfDsKRITMwtH/zE4rXUNzYlXI0kSZIkSYXLsKRI9OnSibH9u7OjsYmnl65LuhxJkiRJkgqWYUkRmexQHEmSJEmSDpthSRHZNW+Jk7xKkiRJknTIDEuKyOSR2XlLHlm4inQ6k3A1kiRJkiQVJsOSIjKiVxcGd69l3bYGXly1MelyJEmSJEkqSIYlRSSVSjEp17vkYYfiSJIkSZJ0SAxLikzzJK+zDEskSZIkSTokhiVFZpJhiSRJkiRJh8WwpMgcM7AH3TpVsnDdVpZu2Jp0OZIkSZIkFRzDkiJTXlbG6SOy85a4hLAkSZIkSS1nWFKEds9bsjrhSiRJkiRJKjyGJUXIeUskSZIkSTp0hiVF6JRhvaksL2PO8vVs2N6QdDmSJEmSJBUUw5IiVFNZwUlDepPJwKMLHYojSZIkSVJLGJYUqUkjs5O8OhRHkiRJkqSWMSwpUpNHOW+JJEmSJEmHwrCkSE0ckQ1LHl+8hvrGpoSrkSRJkiSpcBiWFKnenasZ17879Y1p6pasTbocSZIkSZIKhmFJEdu9hLCTvEqSJEmSdLAMS4pY87wlDy9YmXAlkiRJkiQVDsOSIjY517PkkQWrSaczCVcjSZIkSVJhMCwpYsN7dmZw91rWb29g3qqNSZcjSZIkSVJBMCwpYqlUalfvkpkuISxJkiRJ0kFJJCwJIVweQlgQQnglhPDBPY5NCyE8F0J4NYTw5bz9Z4UQXspdd+3B3Eu7h+LMnG9YIkmSJEnSwaho7w8MIXQFvgWcBjQBz4QQbo0xrg4hdAd+BkwCVgD3hxDuBmYBvwTeCrwKzA4h3J57v9d7tff36qgmjeoLwCx7lkiSJEmSdFCS6FkyBXgwxrgsxrgCuA84L3fsSGBRjHFRjLEeuAm4EDgRWBFjnBNj3Ar8BbjoAPcSMH5AD7p1qmTR+q0sWb816XIkSZIkSerw2r1nCTAUWJS3vRQYmHs/HzgihDAGWAKcm3vd2zUBqN/PvfZp7ty5h1p74urq6lp8zfie1TyyfCe/ue9xpozo3gZVqa0cSnurMNnWpcX2Lh22dWmxvUuHbV06bOvSlURYUgWk87bTZIfQEGNcG0K4EvgbsB6YA2zYzzX7vNf+jB8/nurq6kP+Akmpq6tjwoQJLb5u2voqHln+DK/R+ZCuVzIOtb1VeGzr0mJ7lw7burTY3qXDti4dtnXxq6+v32dniiSG4SwHBudtDyHbewSAGONNMcbxMcYzgAzwwn6u2e+9lDUpN8nrrAVO5SJJkiRJ0oEk0bPkLuBrIYR+ZMOaicBHmw+GEHrEGDeEECaQnZPkGrI9RkIIIZAdavNWYCrZYTj7vJeyThnWh6ryMp5bsZ4N2xvoUVOVdEmSJEmSJHVY7d6zJDcR67XAo2RXubkauDCEcE3ulF+FEBaRXf3mihjjjhhjA/Ah4FbgeeAHuUlg33Cv3ASwytOpspyThvYmk4FHFtq7RJIkSZKk/UmiZwkxxhuBG/dx7LJ97L+D7Go5B30v7TZpZD8eWbiaWQtWMW3s4ANfIEmSJElSiUpizhIlYNLIvgDMWrAq4UokSZIkSerYDEtKRPMkr08sXkN94wEXDJIkSZIkqWQZlpSIXrXVHD2gO/WNaZ5asjbpciRJkiRJ6rAMS0rI7iWEHYojSZIkSdK+GJaUkOawZKZhiSRJkiRJ+2RYUkLOyIUljyxYTTqdSbgaSZIkSZI6JsOSEjKsZ2eGdK9l/fYGXli5IelyJEmSJEnqkAxLSkgqlcobirM64WokSZIkSeqYDEtKzBmjnORVkiRJkqT9MSwpMU7yKkmSJEnS/hmWlJijB3Sne6dKFq/fyuL1W5MuR5IkSZKkDsewpMSUl5Vx+oi+gENxJEmSJEnaG8OSEuS8JZIkSZIk7ZthSQly3hJJkiRJkvbNsKQEnTy0D1XlZcxdsYH12+qTLkeSJEmSpA7FsKQEdaos5+Shvclk4NFFa5IuR5IkSZKkDsWwpETtGoozf2XClUiSJEmS1LEYlpSoSbsmeV2dcCWSJEmSJHUshiUlamJu+eAnFq9hx86mhKuRJEmSJKnjMCwpUb1qqxk/oAcNTWnqlq5NuhxJkiRJkjoMw5IStnveEpcQliRJkiSpmWFJCZs0MjsUZ+YCwxJJkiRJkpoZlpSwM0b1B+CRhatJpzMJVyNJkiRJUsdgWFLChvXszNAetWzY3sDzKzckXY4kSZIkSR2CYUmJ2zVviUNxJEmSJEkCDEtK3uRcWDLLSV4lSZIkSQIMS0re5FG5sGTh6oQrkSRJkiSpYzAsKXFH9+9B906VLF6/lcXrtyZdjiRJkiRJiTMsKXFlZSkmOm+JJEmSJEm7GJaIySP7AjDLsESSJEmSJMMSweSR/QHDEkmSJEmSwLBEwElDe1NVXsbcFRtYv60+6XIkSZIkSUqUYYnoVFnOyUN7k8nAI66KI0mSJEkqcYYlAvKWEHYojiRJkiSpxBmWCIBJzSvizDcskSRJkiSVNsMSATBxRHZFnCeXrGXHzqaEq5EkSZIkKTmGJQKgZ2014wf0oKEpzVNL1iZdjiRJkiRJiTEs0S7OWyJJkiRJkmGJ8jTPW/KwYYkkSZIkqYQZlmiXybmw5JEFq0inMwlXI0mSJElSMgxLtMuwnp0Z1rMzG3fs5PmVG5IuR5IkSZKkRBiW6HUm5VbFcQlhSZIkSVKpMizR60zKTfI603lLJEmSJEklyrBEr9M8b4kr4kiSJEmSSpVhiV7n6P496FFTxZIN21i8fmvS5UiSJEmS1O4MS/Q6ZWUpJubmLXl4/sqEq5EkSZIkqf0ZlugNdg/FWZ1wJZIkSZIktT/DEr3B5FHOWyJJkiRJKl2GJXqDk4b2prqijLkrNrB+W33S5UiSJEmS1K4MS/QG1RXlnDy0DwCzFjoUR5IkSZJUWgxLtFeTRmYneZ0136E4kiRJkqTSYliivZo8qj/gvCWSJEmSpNJjWKK9On14H1IpeHLJWnbsbEq6HEmSJEmS2o1hifaqZ2014wf0oKEpzZNL1iRdjiRJkiRJ7cawRPs0eaRLCEuSJEmSSo9hifZpUi4smbnAFXEkSZIkSaXDsET71Nyz5JEFq2hKpxOuRpIkSZKk9mFYon0a2rMzw3p2ZuOOnTy/YmPS5UiSJEmS1C4qkvjQEMLlwHVAE/DVGOMNecdOAW4AugC3AFcBo4AZebfoAfwxxviJEMLtwNFAI/BqjHFKu3yJEjF5ZD/+b/0CZi1YxbGDeiZdjiRJkiRJba7de5aEELoC3wIm536+GkLom3fKT4B3kw1IhgJTY4wvxxjHNP8Ac4Drc+f3Bk7KHTMoaWXN85Y8PN9JXiVJkiRJpSGJYThTgAdjjMtijCuA+4Dz8o4vBrqT7fVSBSzLvziEcA6wLsb4XG5XD2B9WxddqiaPzOZYMxesIpPJJFyNJEmSJEltL4lhOEOBRXnbS4GBedtfAWYB9cAdMcbZe1x/DfD1vO0a4OUQwirgSzHGOw9UwNy5cw+l7g6hrq6uXT8vncnQraqMZRu3cfvDjzGwc1W7fn6pa+/2VnJs69Jie5cO27q02N6lw7YuHbZ16UoiLKkC8pdWSZOdu4QQQg3wR+BUYB7wmxDCx2KM1+eOjwSGxhgfbr44xjg8d+wM4K8hhDExxg37K2D8+PFUV1e33jdqJ3V1dUyYMKHdP/eMZzdx+wvL2Ni5PxdPGNXun1+qkmpvtT/burTY3qXDti4ttnfpsK1Lh21d/Orr6/fZmSKJYTjLgcF520OAJbn3xwCrY4xzYow7gd8A0/LOfSdw095umgtQFgIjWrnekte8hPDMBc5bIkmSJEkqfkn0LLkL+FoIoR/ZsGYi8NHcsQXAmBDCcLJzl1wKxLxrLwE+3bwRQqgEBsYYF4cQTiA7nOfltv8KpaV5ktdZhiWSJEmSpBLQ7j1LcpO6Xgs8SnZukquBC0MI18QYVwPvB+4mO69Jb7JzmBBCKAfGk10Jp1klcGcIYT7wS+CKGOPWdvoqJeOkob2prijj+RUbWbetPulyJEmSJElqU0n0LCHGeCNw4z6OTQem72V/E9lVcvL3bQPGtn6FylddUc4pw/rw8PxVPLJwNRePG5J0SZIkSZIktZkk5ixRAWoeijNzvkNxJEmSJEnFzbBEB8V5SyRJkiRJpcKwRAdl4oi+pFLw5JK1bN/ZmHQ5kiRJkiS1GcMSHZQeNVUcM6AnO5vSPLl4bdLlSJIkSZLUZgxLdNAmjewLOBRHkiRJklTcDEt00CaPyk3yalgiSZIkSSpihiU6aJNzk7w+unA1Tel0wtVIkiRJktQ2DEt00Ib06Mzwnp3ZuGMnc1dsSLocSZIkSZLahGGJWmTXEsLzVydciSRJkiRJbcOwRC3ivCWSJEmSpGJnWKIWaZ63ZOaCVWQymYSrkSRJkiSp9RmWqEXG9utOz5oqlm3cxqL1W5MuR5IkSZKkVmdYohYpK0vtmrfEoTiSJEmSpGJkWKIWax6KM8uwRJIkSZJUhAxL1GKTRvYFYOZ8wxJJkiRJUvExLFGLTRjam+qKMl5YuZG1W+uTLkeSJEmSpFZlWKIWq64o59RhfQB4ZKG9SyRJkiRJxcWwRIdk0q55S1YnXIkkSZIkSa3LsESHZNeKOM5bIkmSJEkqMoYlOiSnj+hLKgVPLV3L9p2NSZcjSZIkSVKrMSzRIelRU8WxA3uysynNk4vXJl2OJEmSJEmtxrBEh2zXUJwFDsWRJEmSJBUPwxIdskkj+wKGJZIkSZKk4mJYokM2Odez5NGFq2lKpxOuRpIkSZKk1mFYokM2pEdnRvTqzKYdO5m7YkPS5UiSJEmS1CoMS3RYXEJYkiRJklRsDEt0WJzkVZIkSZJUbAxLdFjOyOtZkslkEq5GkiRJkqTDZ1iiw3JUv+70qq3itU3bWbR+a9LlSJIkSZJ02AxLdFjKylJMHJHtXfKw85ZIkiRJkoqAYYkO2xmjsmHJLOctkSRJkiQVAcMSHbbmSV4NSyRJkiRJxcCwRIftxCG96FRRzgsrN7J2a33S5UiSJEmSdFgMS3TYqivKOWVYb8DeJZIkSZKkwmdYolYx2XlLJEmSJElFwrBErWL3vCWrE65EkiRJkqTDY1iiVnH68L6kUvDU0rVs39mYdDmSJEmSJB0ywxK1iu41VRw3sCc7m9I8sXht0uVIkiRJknTIDEvUalxCWJIkSZJUDAxL1Gqaw5KH5xuWSJIkSZIKl2GJWk3zijiPLlxNUzqdcDWSJEmSJB0awxK1msHdaxnZqwub63fy3PINSZcjSZIkSdIhMSxRq3LeEkmSJElSoTMsUauaNLIv4LwlkiRJkqTCZViiVjU5r2dJJpNJuBpJkiRJklrOsEStamz/7vSurea1TdtZuG5L0uVIkiRJktRihiVqValUiom5oTgzF6xOuBpJkiRJklrOsEStrnkozswFKxOuRJIkSZKkljMsUaubPKp53hJ7lkiSJEmSCo9hiVrdiYN70aminHkrN7Jmy46ky5EkSZIkqUUMS9TqqirKOXV4HwBmLbR3iSRJkiSpsBiWqE1Myk3yOmvBqoQrkSRJkiSpZQxL1CYmj+wPGJZIkiRJkgqPYYnaxOkj+lCWSlG3dB3bGhqTLkeSJEmSpINmWKI20a1TFccO7MHOpjRPLF6TdDmSJEmSJB00wxK1md1LCDsUR5IkSZJUOAxL1GYmjcyGJTMXuCKOJEmSJKlwGJaozTSHJY8uXE1TOp1wNZIkSZIkHZyKJD40hHA5cB3QBHw1xnhD3rFTgBuALsAtwFUxxqYQwo+Ay4AdQH2M8ejc+WcBPwcqgV/EGP+7Xb+M9mlw91pG9urCgnVbmPPaBk4Y0ivpkiRJkiRJOqB271kSQugKfAuYnPv5agihb94pPwHeDYwChgJTc/t7A2+OMY7JC0rKgF8CbwfGA+8LIRzfHt9DB8d5SyRJkiRJhSaJYThTgAdjjMtijCuA+4Dz8o4vBrqT7fVSBSzL7e8FrNvjXicCK2KMc2KMW4G/ABe1ZfFqmd3zlhiWSJIkSZIKQxLDcIYCi/K2lwID87a/AswC6oE7Yoyzc/trgXtDCBuAb8YYf7ePe4UDFTB37txDLj5pdXV1SZfQIj231QNw/0vLeOqpp0ilUglXVFgKrb116Gzr0mJ7lw7burTY3qXDti4dtnXpSiIsqQLyZ/tMk527hBBCDfBH4FRgHvCbEMLHYozXxxgn5845GrgnhPDU/u61P+PHj6e6uro1vku7qqurY8KECUmX0SInZjL0vn8pa7bV02tkYFTvrkmXVDAKsb11aGzr0mJ7lw7burTY3qXDti4dtnXxq6+v32dniiSG4SwHBudtDwGW5N4fA6zODavZCfwGmJZ/cYzxebI9T8Ye4F7qAFKpFJNGZqekcSiOJEmSJKkQJBGW3AVMCSH0CyEMACbm9gEsAMaEEIaHEFLApUAECCGMyb0OJ9vz5BngseyuEEIInYG3Aje355fRgU0e6SSvkiRJkqTC0e5hSW5S12uBR8n2ELkauDCEcE2McTXwfuBusnOR9CY7hwnAr0IIC4AZwNUxxoUxxgbgQ8CtwPPAD2KM+XOYqAOYlFsRZ+Z8wxJJkiRJUseXxJwlxBhvBG7cx7HpwPS97J+0j/PvAI5sxfLUyk4c3IuaynJeXLWJ1Vt20LdLp6RLkiRJkiRpn5IYhqMSU1VRzqnD+gDwyMLVCVcjSZIkSdL+GZaoXUwa6VAcSZIkSVJhMCxRu5jkJK+SJEmSpAJhWKJ2cfqIPpSlUtQtXcu2hsaky5EkSZIkaZ8MS9QuunWq4rhBPWlMZ3hi8Zqky5EkSZIkaZ8MS9RuJo3sC8CX7niWVZu3J1yNJEmSJEl7Z1iidvOJyUcxoGsNMxes4uTvTLeHiSRJkiSpQzIsUbs5sm83nrxqGhNH9GXpxm2c9cM7+cVjLyddliRJkiRJr2NYonY1qHst9155AR+fFGhoSvPRPz/GR//8KPWNTUmXJkmSJEkSYFiiBFRVlPODt57CDf8wkU4V5fzisVc4+0d3snTD1qRLkyRJkiTJsETJed/Jo3n4U1MY3rMzTyxey0nfuZ0HXlmRdFmSJEmSpBJnWKJEnTikN098ZhrnHTGA1VvqufCn9/DdB18gk8kkXZokSZIkqUQZlihxfbp0YsZHzuPz5xxNUzrD1bfUccXvZrK1fmfSpUmSJEmSSpBhiTqE8rIyvnbxifzpfWfSpbqCP8xeyKQf3MGrazYnXZokSZIkqcQYlqhDeduxw3n0n6dyZN9uPLd8A6d8dzrT5y1LuixJkiRJUgkxLFGHM25ADx779FQuPXoIG7Y3cOkv7+O/7p5DOu08JpIkSZKktmdYog6pe00VN73/bL4y9XgAvnTHs7zlfx9g4/aGZAuTJEmSJBU9wxJ1WGVlKf7t/GO47cPn0rOmitteWMqp353O8ys2JF2aJEmSJKmIGZaow7voqME8cdU0jhvUk5fXbOb0783gz88uSrosSZIkSVKRMixRQRjVuyszP3UR7zphBFsbGvmHXz/Ev9xaR2NTOunSJEmSJElFxrBEBaO2qoLf/ONkvvvmkygvS/HNB15g6s/uZfWWHUmXJkmSJEkqIoYlKiipVIpPnTGWez52Af26dOK+V1Zwynen89SStUmXJkmSJEkqEoYlKkhnju7PU599E6cN78Pi9Vs584d38L9PvJJ0WZIkSZKkImBYooI1uHst9338Qj56+pHUN6b58B8f5eN/eZyGxqakS5MkSZIkFTDDEhW06opyfvz2U/n55adTXVHGTx99iXN+fBfLNm5LujRJkiRJUoEyLFFR+OCpY3jwE1MY2qOWxxat4eTv3M7D81cmXZYkSZIkqQAZlqhonDysD09e9SbOHTOAlZt3cP5P7uYHD88jk8kkXZokSZIkqYAYlqio9O3SiRkfOY+rzx5HYzrDZ/72FO/7/Sy2NTQmXZokSZIkqUAYlqjoVJSX8Y1LJvD795xB56oKfle3gMk/uIP5azcnXZokSZIkqQAYlqhoXX78CB7554sY06crz762nlO+M507XlyWdFmSJEmSpA7OsERFbfzAnjz+mWm8adxg1m9v4OJf3MfX7nmOdNp5TCRJkiRJe2dYoqLXo6aKv33gHP5jynEAfHHGM7z9Vw+yaUdDwpVJkiRJkjoiwxKVhLKyFP9+4bH8/YPn0L1TJX+fu4TTvjuDeSs3Jl2aJEmSJKmDMSxRSXnTuCE8cdU0xg/oQVy9idO+N52b5yxOuixJkiRJUgdiWKKSM6ZPNx7554t45/Ej2FLfyDt+9SD/dvvTNKXTSZcmSZIkSeoADEtUkjpXV/K7KybzrUsnUF6W4rr7nmfaz+9j7db6pEuTJEmSJCWsRWFJCOFdIYQpedv/EEKYHUL4YwihV+uXJ7WdVCrFZ84ax50fPZ++Xaq556XlnPyd23l66dqkS5MkSZIkJailPUu+BaQAQggjgRuB54CRwHdatTKpnZwzZgBPfuZNnDy0N4vWb+WMH9zJr596NemyJEmSJEkJaWlY0h1ong3z08BjMcb3Ap8ELmrNwqT2NLRnZx74xBQ+dOoYdjQ28YHfP8Knbn6ChsampEuTJEmSJLWzloYlzwFXhBAmAx8k29MEIA10ac3CpPbWqbKcn11+Ote/4zSqysv48azI+T+5m+WbtiVdmiRJkiSpHbU0LPki8BngQeCRGOOtuf0XAS+0Yl1SYv7ptCN44BMXMrh7LbMWruakb09n1oJVSZclSZIkSWonLQpLYoz3AMOAk4CpeYemA+9qxbqkRJ06vC9PXjWNs0b3Z8Xm7Zz747v48cxIJpNJujRJkiRJUhuraOkFMcY1wBqAEEInYArwaozxlVauTUpU/6413PnR8/nCbU/z3Yfm8am/PsGTS9bw47efSk1lix8dSZIkSVKBaOnSwY+HEK7JvS8HHgD+CswOIby99cuTklVZXsa3LjuJ3/7jZGoqy/n1U/M54wd3snDdlqRLkyRJkiS1kZbOWXIMcE/u/TuAI4AxwFXAta1Yl9ShvOvEkTzyz1MZ1bsLs5et49Jf3ueQHEmSJEkqUi0NSzaye9WbzwI/jTHOB+4DjmzNwqSO5thBPXniM9Po07ma51dsZN7KjUmXJEmSJElqAy0NS24CfhNCuBsYB3wvt38M2SBFKmo9a6u56KjBAMyYtyzhaiRJkiRJbaGlYck1ZAOTbcCbY4wrc/snAD9tzcKkjmra2GxYMt2wRJIkSZKKUouW9Igx7iAbmOy5/0utVpHUwV0YBlJelmLmglVs3N5A95qqpEuSJEmSJLWilvYsIYRwRQjhzhDCiyGEkbl9bwohDG798qSOp2dtNRNH9KUxneHul5YnXY4kSZIkqZW1dOnga4AfAi8BI4HK3KEzgP9p3dKkjmvqUQ7FkSRJkqRi1dKeJR8D/inG+Ckgnbf/VuCsVqtK6uCmjcuGJXe8uIx02iWEJUmSJKmYtDQsGQTEvexPA70OvxypMIwf0IOhPWpZuXkHTy9bl3Q5kiRJkqRW1NKwZCbw0bztTAihArgamNtqVUkdXCqVYupYlxCWJEmSpGLU0rDkn4E3hxAeJ7uSzg+BV4A3Af/SyrVJHdruJYSXJlyJJEmSJKk1tSgsiTG+CATgr7mfbcDvgSNjjPe1fnlSx3XumAFUV5Tx5JK1rNq8PelyJEmSJEmtpKKlF8QYtwBfb4NapILSubqSs0YP4K74GnfE13jvSaOTLkmSJEmS1ApaHJaEEI4mu1RwXyCVfyzG+OWDvMflwHVAE/DVGOMNecdOAW4AugC3AFfFGJtCCFcCHyE7kexvY4zX5s6/HTgaaARejTFOael3kg7VtLGDuCu+xvQXlhmWSJIkSVKRaNEwnBDCZ4A5wHeADwLvyfu54iDv0RX4FjA59/PVEELfvFN+ArwbGAUMBabm9qeBk4BxZOdNmZjb3xs4KcY4xqBE7W3a2CEA3BVfo7EpfYCzJUmSJEmFoKU9Sz4HXA9cHWPccYifOQV4MMa4DCCEcB9wHvCH3PHFQPdcbVXAMoAY409zx7eGEF4k27MFoAew/hBrkQ7L6D5dCX27EVdv4pGFqzlzdP+kS5IkSZIkHaaWrobTCfj5YQQlkO0tsihveykwMG/7K8BdwCpgc4xxdv7FuWFApwAP5nbVAC+HEB4LIdizRO3OJYQlSZIkqbi0tGfJDcDFwDOH8ZlVZIfUNEuTnbuEEEIN8EfgVGAe8JsQwsdijNfnjl8E/Ah4d4xxA0CMcXju2BnAX0MIY5qP7cvcuXMPo/xk1dXVJV2C9jCmYisANz39Cm8fmGnVe9vepcO2Li22d+mwrUuL7V06bOvSYVuXrpaGJduBT4QQTgeeBnbmHzzICV6XA2fnbQ8BHs+9PwZYHWOcAxBC+A3wUeD6EMI7gc8A58UYF+550xjjwyGEhcAIDhDmjB8/nurq6oMotWOpq6tjwoQJSZehPRzT2MQXZv2JVzfW03fUUQzr2blV7mt7lw7burTY3qXDti4ttnfpsK1Lh21d/Orr6/fZmaKlYcl7gB1kJ1kdt8exDHAwYcldwNdCCP3IDgOaSDYQAVgAjAkhDCc7d8mlQAwhVANfA06IMW5svlEIoRIYGGNcHEI4gexwnpdb+J2kw1JVUc75Rw7kb88tYfq8ZXxs4pFJlyRJkiRJOgwtCktijCMP9wNjjCtCCNcCj+Z2XQ1cGEIYHWP8Zgjh/cDdZOdHeYLspLIjgcFAXQih+Va/Af4HuDMXpmwArogxbj3cGqWWmnrU4FxYstSwRJIkSZIKXIvCkhDC/wO+v+ecICGEUcCUGONPDuY+McYbgRv3cWw6MH2P3ZuAfY2bGXswnym1pWm5SV7ve3kFO3Y20amyPOGKJEmSJEmHqqWr4XwJ6LmX/T2Abx12NVKBGtS9lhMG92L7ziYeeHVF0uVIkiRJkg7DAXuWhBBGA9fmNlPAN0IIm/e4x0ScK0QlburYQcxeto4Z85Zx0VGDky5HkiRJknSIDqZnyWJgADCU7CSuA3Pvm3/6Aw8Al7dNiVJhmDZ2CADT5y0jk2ndJYQlSZIkSe3ngD1LYow7gWkAIYQ08N4Y4/y2LkwqNKcM603v2mrmr93CS6s3Efp1T7okSZIkSdIhaNGcJTHGMoMSae/Ky8qYctQgINu7RJIkSZJUmPbbsySE8NkY47fztt+7v/NjjL9urcKkQjR17GD+7+kFTH9hGVedNS7pciRJkiRJh+BAw3CuDSH8Ksa4Nrf9y/2cmwEMS1TSLjpqEGWpFA8vWMWmHQ1061SVdEmSJEmSpBY6UFjSFRgDNIclM4F/jDG+1qZVSQWqV201pw/vw6yFq7nnpRW89dhhSZckSZIkSWqhA81Zsgw4L4TQ/M/jZwLVbVuSVNimjs0uGzzDeUskSZIkqSAdqGfJF4BfAV8JIQCkgFdy798gxljeqtVJBWjauMF8ccYzzHgxu4RwKpVKuiRJkiRJUgvsNyyJMf4xhDALOAnoQnZOks8BK9uhNqkgHTuwJ4O717Js4zaeWbaeE4b0SrokSZIkSVILHKhnCTHGpcBSgBDCecCvY4xr2rowqVClUimmjh3ELx57henzlhqWSJIkSVKBOdCcJa8TY/yAQYl0YFOPys5bMt15SyRJkiSp4LQoLJF0cM4/ciBV5WU8vngNa7bsSLocSZIkSVILGJZIbaBLdSVnju5PJgN3uNK2JEmSJBUUwxKpjUxzCWFJkiRJKkiGJVIbaQ5L7nzxNRqb0glXI0mSJEk6WIYlUhs5om83xvTpyvrtDTy+2HmRJUmSJKlQGJZIbai5d4mr4kiSJElS4TAskdrQVOctkSRJkqSCY1gitaGzRvenc1UFz762nqUbtiZdjiRJkiTpIBiWSG2ouqKc844YADgUR5IkSZIKhWGJ1MYciiNJkiRJhcWwRGpjzZO83vvyCuobmxKuRpIkSZJ0IIYlUhsb0qMzxw7sydaGRh56dWXS5UiSJEmSDsCwRGoH08a5hLAkSZIkFQrDEqkdTD3KeUskSZIkqVAYlkjt4LThfehZU8XLazbz8upNSZcjSZIkSdoPwxKpHVSUlzHlqEGAQ3EkSZIkqaMzLJHaSfMSwoYlkiRJktSxGZZI7eSiMIhUCh56dSVb6ncmXY4kSZIkaR8MS6R20qdLJ04d1oeGpjT3vrwi6XIkSZIkSftgWCK1o2m7huIsTbgSSZIkSdK+GJZI7ah53pIZ814jk8kkXI0kSZIkaW8MS6R2dMLgXgzsVsOyjduYs3x90uVIkiRJkvbCsERqR6lUiqlH5YbivOCqOJIkSZLUERmWSO1s91AcwxJJkiRJ6ogMS6R2dv6RA6gsL+PRRWtYu7U+6XIkSZIkSXswLJHaWbdOVZwxsh/pTIa74mtJlyNJkiRJ2oNhiZSAaeOalxB2KI4kSZIkdTSGJVICpuXmLbnzxddoSqcTrkaSJEmSlM+wRErAkX27Map3F9Zuq+eJxWuTLkeSJEmSlMewREpAKpXa1btk+rylCVcjSZIkScpnWCIlZPcSwk7yKkmSJEkdiWGJlJCzRw+gprKc2cvW8drGbUmXI0mSJEnKMSyREtKpspxzjxgAwIwXXRVHkiRJkjoKwxIpQdPGDgFcQliSJEmSOhLDEilBzZO83vPSchoamxKuRpIkSZIEhiVSoob17Mz4AT3YUt/Iw/NXJV2OJEmSJAnDEilxzb1LnLdEkiRJkjoGwxIpYc1LCE9/wbBEkiRJkjoCwxIpYRNH9KV7p0ri6k28umZz0uVIkiRJUskzLJESVlFexoVhEAAzXBVHkiRJkhJnWCJ1ANPGZYfi3G5YIkmSJEmJMyyROoCLwiBSKXjw1RVsrd+ZdDmSJEmSVNIMS6QOoF/XGk4e2pv6xjT3vbIi6XIkSZIkqaQZlkgdxLSxQwCYMe+1hCuRJEmSpNJmWCJ1ELuWEJ63lEwmk3A1kiRJklS6KpL40BDC5cB1QBPw1RjjDXnHTgFuALoAtwBXxRibQgjjgd8BPXL7Px1jTIcQzgJ+DlQCv4gx/ne7fhmplZw4uBf9u3ZiyYZtzF2xIelyJEmSJKlktXvPkhBCV+BbwOTcz1dDCH3zTvkJ8G5gFDAUmJrb/2PgC7n9xwKXhhDKgF8CbwfGA+8LIRzfDl9DanVlZSkuOirbu8QlhCVJkiQpOUkMw5kCPBhjXBZjXAHcB5yXd3wx0J1sr5cqYFkuTBkZY5wRY2wi28PkIuBEYEWMcU6McSvwl9x+qSBN2zUUx7BEkiRJkpKSRFgyFFiUt70UGJi3/RXgLmAVsDnGOBsYQjZE2fOaA91LKigXHDmQirIUjyxczaaGpqTLkSRJkqSSlMScJVVAOm87TXbuEkIINcAfgVOBecBvQggfA2bv45p93mt/5s6dexjlJ6uuri7pEtTGjutTQ92qbTy+fAvdbO+S4bNdWmzv0mFblxbbu3TY1qXDti5dSYQly4Gz87aHAI/n3h8DrI4xzgEIIfwG+CgwHRi8xzVLcvfa2/79Gj9+PNXV1YdYfnLq6uqYMGFC0mWojb1zUyfqbnuaWa9t4QtvPTfpctQOfLZLi+1dOmzr0mJ7lw7bunTY1sWvvr5+n50pkhiGcxcwJYTQL4QwAJiY2wewABgTQhgeQkgBlwIxxrgY2BpCODuEUA68B/gz8BgQcjoDbwVubu8vJLWm5iWEH31tC+m0SwhLkiRJUntr97AkN6nrtcCjwCzgauDCEMI1McbVwPuBu8nORdKb7BwmAO8DfgAsBB6KMc6MMTYAHwJuBZ4HfhBjzJ/DRCo4Y/t3Z0Svzqyvb+LJJWuSLkeSJEmSSk4Sw3CIMd4I3LiPY9PJDrvZc//TZIfp7Ln/DuDI1q1QSk4qlWLqUYP5ySMvMWPea5w6vO+BL5IkSZIktZokhuFIOoBp44YAMH3e0oQrkSRJkqTSY1gidUDnjOlPdXmKuqXrWLFpe9LlSJIkSVJJMSyROqCaygpO6t8ZgBkvLku4GkmSJEkqLYYlUgc1aVAXAGbMMyyRJEmSpPZkWCJ1UBNzYcndLy1nZ1M64WokSZIkqXQYlkgd1KAuVYzr351NO3Yyc8GqpMuRJEmSpJJhWCJ1YFPHDgYciiNJkiRJ7cmwROrApuXCkumGJZIkSZLUbgxLpA5s0sh+dOtUybyVG1mwdnPS5UiSJElSSTAskTqwyvIyLjhyIAAz5r2WcDWSJEmSVBoMS6QObtrYIQBMf9GhOJIkSZLUHgxLpA7uoqMGAXD/yyvY1tCYcDWSJEmSVPwMS6QObkC3Gk4a2psdjU3c/8qKpMuRJEmSpKJnWCIVgKlHuYSwJEmSJLUXwxKpAEwbt3sJ4Uwmk3A1kiRJklTcDEukAnDSkN707VLNovVbmbdyY9LlSJIkSVJRMyyRCkBZWYqLjtrdu0SSJEmS1HYMS6QCMW2s85ZIkiRJUnswLJEKxIVhEOVlKWYuWMXG7Q1JlyNJkiRJRcuwRCoQPWqqmDSiL43pDHe/tDzpciRJkiSpaBmWSAVk6ljnLZEkSZKktmZYIhWQ/HlL0mmXEJYkSZKktmBYIhWQowf0YFjPzqzasoOnl61LuhxJkiRJKkqGJVIBSaVSTG1eQviFpQlXI0mSJEnFybBEKjDTxuWG4rzovCWSJEmS1BYMS6QCc87o/lRXlPHkkrWs2rw96XIkSZIkqegYlkgFpnN1JWePGUAmA3fE15IuR5IkSZKKjmGJVICm7Zq3xKE4kiRJktTaDEukAtQ8b8ld8TV2NqUTrkaSJEmSiothiVSARvXuylH9urFxx04eXbg66XIkSZIkqagYlkgFaurY3FCceQ7FkSRJkqTWZFgiFahpubBkhmGJJEmSJLUqwxKpQE0e2Y+u1ZXMXbGBxeu3Jl2OJEmSJBUNwxKpQFVVlHP+kQMBh+JIkiRJUmsyLJEK2NSxgwCYPm9pwpVIkiRJUvEwLJEKWPO8Jfe9vILtOxsTrkaSJEmSioNhiVTABnar5cQhvdi+s4kHX12ZdDmSJEmSVBQMS6QCN/Wo3BLCLzhviSRJkiS1BsMSqcBNG5dbQvjFZWQymYSrkSRJkqTCZ1giFbiTh/amT+dq5q/dQly1KelyJEmSJKngGZZIBa68rIwpR2VXxZnxokNxJEmSJOlwGZZIRcB5SyRJkiSp9RiWSEVgylGDKEuleGj+SjbtaEi6HEmSJEkqaIYlUhHoVVvNxBF9aUxnuOelFUmXI0mSJEkFzbBEKhJTx2bnLZk+b2nClUiSJElSYTMskYrEtLFDAJgx7zWXEJYkSZKkw2BYIhWJYwb2YEj3WlZs3s7sZeuSLkeSJEmSCpZhiVQkUqkUU8dmV8WZMc9VcSRJkiTpUBmWSEWkOSyZblgiSZIkSYfMsEQqIucdMYCq8jIeX7yGNVt2JF2OJEmSJBUkwxKpiHSpruSs0f3JZOCO+FrS5UiSJElSQTIskYrMtOahOC84FEeSJEmSDoVhiVRkpo3LhiV3xddobEonXI0kSZIkFR7DEqnIjOnTjSP6dGX99gYeW7Qm6XIkSZIkqeAYlkhFqLl3yYwXHYojSZIkSS1lWCIVoalHOW+JJEmSJB0qwxKpCJ05uj+dqyqYs3w9SzdsTbocSZIkSSoohiVSEaquKOf8IwcCMH2evUskSZIkqSUqkvjQEMLlwHVAE/DVGOMNuf1HADPyTu0B/BH4C/DzvP19gf+KMf5PCOF5oDq3/6EY4wfbuHypIEwdO5i/z13C9HnL+MjpRyZdjiRJkiQVjHYPS0IIXYFvAaeRDUueCSHcGmNcHWN8GRiTd+59wPUxxuea94cQKoA64Fe506pjjGOQ9DrTxmbnLbn35eXUNzZRXVGecEWSJEmSVBiSGIYzBXgwxrgsxrgCuA84b8+TQgjnAOtyQUm+9wB3xxhX5bYzbVqtVKAGd6/luEE92dbQxIOvrky6HEmSJEkqGEkMwxkKLMrbXgoM3Mt51wBf38v+q4BLAEIInYH+IYT5uXt+Psb45IEKmDt3bktr7jDq6uqSLkHt6HDb+4Se5Tz7Gvzqwdn03rK8lapSW/DZLi22d+mwrUuL7V06bOvSYVuXriTCkiognbedJjscZ5cQwkhgaIzx4T32nwUsjjEuAogxbgW65Y69A7iZbBizX+PHj6e6uvpAp3U4dXV1TJgwIeky1E5ao70/2GsVNz5/J0+t3envnQ7MZ7u02N6lw7YuLbZ36bCtS4dtXfzq6+v32ZkiiWE4y4HBedtDgCV7nPNO4Ka9XPsu4M97u2mM8c9ATQihRyvUKBWF04b3oVdtFa+s2czLqzclXY4kSZIkFYQkwpK7gCkhhH4hhAHAxNy+fJcAt+/l2ouB6c0bIYTuIYQ+ufdTgbUxxg1tUrVUgMrLypgSBgEuISxJkiRJB6vdw5LcpK7XAo8Cs4CrgQtDCNcAhBDKgfHAnPzrQgiDgcYY4+q83b2Ax0MIrwJfBC5v+28gFZapuVVxbn9hacKVSJIkSVJhSGLOEmKMNwI37uNYE9B9L/uXASP22LcAGN3qBUpF5KKjBpNKwUPzV7GlfiddqiuTLkmSJEmSOrQkhuFIake9O1dz2rC+7GxKc89LrogjSZIkSQdiWCKVgGnjskNxZrzovCWSJEmSdCCGJVIJmHpULiyZ9xqZTCbhaiRJkiSpYzMskUrA8YN7MqhbDcs2bmPO8vVJlyNJkiRJHZphiVQCUqnUrlVxpr/gUBxJkiRJ2h/DEqlE7ApL5hmWSJIkSdL+GJZIJeL8IwZSWV7GY4vWsHZrfdLlSJIkSVKHZVgilYiunSo5c1Q/0pkMd8bXki5HkiRJkjoswxKphEwb27wqjkNxJEmSJGlfDEukEtI8b8mdL75GUzqdcDWSJEmS1DEZlkgl5Mi+3Rjduytrt9XzxOK1SZcjSZIkSR2SYYlUQlKpFNPGNa+KszThaiRJkiSpYzIskUrM1KOa5y1xkldJkiRJ2hvDEqnEnDW6P7VV5cxeto7F67cmXY4kSZIkdTiGJVKJ6VRZzkW53iVvueF+1m2rT7giSZIkSepYDEukEvS9N5/MEX268sxr65ny03tYb2AiSZIkSbsYlkglaFD3Wu79+IWM6dOVp5euY8pP72HD9oaky5IkSZKkDsGwRCpRg7vXcu+VFzC6d1fqlq7jop/ew0YDE0mSJEkyLJFK2ZAenbn3ygsY2asLTy5Zy9Sf3cumHQYmkiRJkkqbYYlU4ob2zAYmI3p15vHFa5j2s/vYvGNn0mVJkiRJUmIMSyQxvFcX7r3yQob17Myji1bzpp/fa2AiSZIkqWQZlkgCYESvLtx75QUM7VHLrIWrueSX97Gl3sBEkiRJUukxLJG0y6jeXbn3ygsZ0r2Wh+ev4tJf3s9WAxNJkiRJJcawRNLrjO7TlXs/fgGDutXw4KsrueyG+9nW0Jh0WZIkSZLUbgxLJL3BmD7duPfjFzKwWw33v7KSN99wP9t3GphIkiRJKg2GJZL26si+3bj3ygsY0LWGe19ewZtveMDARJIkSVJJMCyRtE+hX3fuufIC+nftxD0vLectNzzAjp1NSZclSZIkSW3KsETSfo3t3517PnYBfbtUc/dLy3nbjQ9Q32hgIkmSJKl4GZZIOqBxA3pwz8cuoE/nau548TXefuODBiaSJEmSipZhiaSDMn5gT+658gJ611Yzfd4yLv/VQzQYmEiSJEkqQoYlkg7aMQN7cveV59OrtorbXljKO39tYCJJkiSp+BiWSGqR4wb14u6PXUDPmipueX4p7/rtw+xsSiddliRJkiS1GsMSSS12/OBe3PWx8+lRU8XfnlvCuw1MJEmSJBURwxJJh+TEIb2586Pn071TJTfPWcwVv5tJo4GJJEmSpCJgWCLpkJ00NBuYdOtUyV+eXcR7/2+WgYkkSZKkgmdYIumwnDysD3d85Dy6Vlfyx2cW8v7fz6IpbWAiSZIkqXAZlkg6bKcO78uMj5xHl+oKfj97IR/4wyMGJpIkSZIKlmGJpFZx+oi+TP+n8+hcVcHv6hbw4T8+amAiSZIkqSAZlkhqNZNG9uP2fzqXzlUV/Pqp+XzkT4+RTmeSLkuSJEmSWsSwRFKrOmNUf2798LnUVpVz45Ov8tE/G5hIkiRJKiyGJZJa3Vmj+3PLh86lprKcG554hY/f9LiBiSRJkqSCYVgiqU2cM2YAf//gOXSqKOfnj73MJ29+gkzGwESSJElSx2dYIqnNnHfkQP72wbOprijjp4++xKcMTCRJkiQVAMMSSW3qgjCIv37gHKoryvjJIy/xmb89aWAiSZIkqUMzLJHU5qYcNYibP3A2VeVl/HBm5LN/f8rARJIkSVKHZVgiqV1cdNRg/vL+s6gsL+P7D7/I526tMzCRJEmS1CEZlkhqN28aN4Q/v+9MKsvL+M6D8/jCbU8bmEiSJEnqcAxLJLWrS44eyh/feyYVZSm++cAL/Nvtsw1MJEmSJHUohiWS2t1l44fyh1xg8o37n+ffZzxjYCJJkiSpwzAskZSItxwzjP97zxmUl6X42r1z+Y87n026JEmSJEkCDEskJehtxw7nd1dkA5P/uvs5vmxgIkmSJKkDMCyRlKh3HDec37x7MmWpFP951xz+6+45SZckSZIkqcQZlkhK3DtPGMGv3j2JslSKL93xLF+757mkS5IkSZJUwgxLJHUI7z5xJP/7romkUvDFGc/wjfvmJl2SJEmSpBJlWCKpw7hiwihu+IdsYPKvt8/mm/c/n3RJkiRJkkqQYYmkDuW9J43mF5dnA5N/ue1pvvPgC0mXJEmSJKnEGJZI6nDef8pofvaO0wG45pY6vvfQvIQrkiRJklRKDEskdUgfPHUM17/jNAA++/en+OHDLyZckSRJkqRSUZHEh4YQLgeuA5qAr8YYb8jtPwKYkXdqD+CPMcZPhBBuB44GGoFXY4xT9ncvSYXvn047gqZ0hk/c9Dif/tuTlKVSfHxySLosSZIkSUWu3cOSEEJX4FvAaWQDjmdCCLfGGFfHGF8GxuSdex9wfW6zN3BSjHHNwdyrfb6NpLb2sYlHkslk+OTNT/Cpvz5BWVmKj008MumyJEmSJBWxJIbhTAEejDEuizGuAO4DztvzpBDCOcC6GONzuV09gPWHci9Jhe3KSYHvv+VkAD5x0+P87NGXEq5IkiRJUjFLYhjOUGBR3vZSYOBezrsG+Hredg3wcghhFfClGOOdLbjX68ydO7elNXcYdXV1SZegdmR773ZaDXz2xP58++mVXPmXx1myeDFvHtMz6bJajW1dWmzv0mFblxbbu3TY1qXDti5dSYQlVUA6bztNdgjNLiGEkcDQGOPDzftijMNzx84A/hpCGHMw99qb8ePHU11dfchfICl1dXVMmDAh6TLUTmzvN5owAQYPeYGrb6nja08uZ9TIEXzglDEHvrCDs61Li+1dOmzr0mJ7lw7bunTY1sWvvr5+n50pkghLlgNn520PAR7f45x3Ajft7eIY48MhhIXAiIO8l6Qi8pmzxtGUzvD5257mn/70KH96ZhG9aqvoUZP76VRF95rKXdvdO+1+36OmiuqK8qS/giRJkqQOLomw5C7gayGEfmTnTJkIfHSPcy4BPt28EUKoBAbGGBeHEE4gO9TmZWDFQdxLUpG5+pyjacpk+NfbZ3NXfK1F13aqKM8FJ9kQpXt+wNKpave+vMBl9/5KOlWUk0ql2uibSZIkSeoI2j0siTGuCCFcCzya23U1cGEIYXSM8ZshhHJgPDAn77JK4M4QQjWwAbgixrgV2LrnvXL7JRW5z587nkuOHsr8tZvZsL2Bjdt3smFHAxu2v/5n446dbNzewIYdDazf1sCOxiZWbN7Ois3bD+lzq8rL8nqqVNK9U9Xreq4092TpvitoeX3PlppKwxZJkiSpo0uiZwkxxhuBG/dxrAnovse+bcDYlt5LUnEb2787Y/t3P/CJOZlMhu07m14fqOzYmQtbGti4o4EN23fuEba8fl9DU5pVW3awasuOQ6q5srzsdSFL906VDChv4PvjGuhRU3VI95QkSZLUuhIJSyQpCalUitqqCmqrKhjUvbbF12cyGXY0NmV7seR6q+wOVnI9WPL27+rVsn134LKjsYnVW+pZvaX+dfe+/xu38JN3nMbF44a01teVJEmSdIgMSyTpIKVSKWoqK6iprGBAt5pDuseOnU253irZnzVb67n274/x3JrtXPbL+/nHCSP57ptPpldt4a3YJUmSJBULwxJJakedKsvpVFlD/667w5a+W0fwyLZavjjjGX5Xt4B7XlrOj952Km85ZliClUqSJEmlqyzpAiSp1JWXpfjMWeN45pqLOXNUP1Zu3sHbb3yQf/j1Q6w+xLlRJEmSJB06wxJJ6iDG9OnGvVdeyA/ecgqdqyr487OLGP+NW/jj7IVkMpmky5MkSZJKhmGJJHUgZWUpPj458Ow1F3PeEQNYs7Wed//2Yd7+qwdZsenQljuWJEmS1DKGJZLUAY3s3ZU7P3o+P3n7qXStruRvzy1h/Ddu4TdPzbeXiSRJktTGDEskqYNKpVJ85PQjee5zlzDlqEGs397A+38/i0t/eT9LN2xNujxJkiSpaBmWSFIHN7RnZ27/8Ln88p0T6VFTxfR5yzjmf27ll4+/bC8TSZIkqQ0YlkhSAUilUrz/lNE897lLuOToIWzasZOP/Okxpv7sXhat25J0eZIkSVJRMSyRpAIyqHstf/3A2fzmHyfTq7aKu19azrHfvJWfPBJJp+1lIkmSJLUGwxJJKjCpVIp3nziSuZ+/lLcdO4wt9Y188qYnuOD6u5m/dnPS5UmSJEkFz7BEkgpU/641/Ol9Z/HH955J3y7VPPDqSo775q18/6F59jKRJEmSDoNhiSQVuLcfN5y5n7uUd50wgm0NTVz196c4+0d38tLqTUmXJkmSJBUkwxJJKgJ9unTit1ecwV8/cDYDu9Uwa+FqTvjmbXzz/udpSqeTLk+SJEkqKIYlklRELh0/lOc+dwnvO3k0Oxqb+JfbnmbyD+7ghRUbki5NkiRJKhiGJZJUZHrWVnPDP0zktg+fy5DutTyxeC0Tvn07X7vnOXY22ctEkgrJ4vVbecevHiR87W/8/ukFZDLOSSVJ7cGwRJKK1NSxg5nzuUv4p9OOoKEpzRdnPMPp35vBs6+tS7o0SdIB7GxK8837n+fob/ydm+cs5pU1m7nidzO54Pq7mbdyY9LlSVLRMyyRpCLWvaaK699xGnd99HxG9OrM7GXrOOU70/nPO5+lobEp6fIkSXsxa8EqTvr27fzLbU+zraGJtx83nB+85RR611Zz/ysrOeFbt3Ht9Nlsrd+ZdKmSVLQMSySpBJx35ECeveYSPj4p0JjO8OW75nDKd6dTt2Rt0qVJknLWbq3nI396lDN/eCdzV2xgZK8u3Pbhc/nje8/k45MD875wGR8+bQw7m9J8/d65jP+fW/n73CVJly1JRcmwRJJKRJfqSn7w1lO4/+MXMrp3V55bvoHTvz+Da6fPZsdOe5lIUlIymQy/evJVxl33d375+CtUlpfxb+ePZ87nLmHq2MG7zuvduZqfvuN0Zv3zRRw/qCeL12/lrf/7AJf+8j4WrN2c4DeQpOJjWCJJJebM0f155pqL+cyZY0lnMnz93rmc9J3beWzR6qRLk6SSM2/lRs77yd188A+PsGZrPWeN7s/sqy/mK1NPoLaqYq/XnDa8L49/Zhrfe/PJdOtUye0vLGP8N27lq/c8R71DLCWpVRiWSFIJqq2q4FuXncTDn7yIo/p1Y97KjZzxgzv53C11bN/ZmHR5klT0tjU08sXpsznhW7fx4Ksr6dO5mv9910TuvfICxvbvfsDrK8rL+OQZR/HCv1zKu08cyY7GJv59xjMc/83buDu+1g7fQJKKm2GJJJWw00f0pe6zF/P5c44G4NsPvsAJ37yNh+evTLgySSpeM+Yt49j/uZWv3TuXnU1pPnzaGOZ94TLee9JoUqlUi+41sFstv/nHydxz5QUc1a8bL63exEU/u5d3/eYhlm3c1kbfQJKKn2GJJJW4TpXlfO3iE3nkny9i/IAevLxmM+f8+C4+/dcnXGlBklrRso3buPxXD3LxL+5jwbotHDOwBw9/cgo/fcfp9KqtPqx7nzNmALOvvpivvekEaqvK+dMzixh33d/57oMv0NiUbqVvIEmlw7BEkgTAycP68MRV0/jiBcdQnkrxw5mR4755G/e9vDzp0iSpoDU2pfn+Q/MYd93fuWnOYmqryvnGxSfy5FVvYuLIfq32OVUV5Xz+3PHM/dylXDZ+KFvqG7n6ljpO/s50Zi1Y1WqfI0mlwLBEkrRLdUU5/3nR8Tz+mWkcP6gnC9Zt4YLr7+HKvzzGph0NSZcnSQXnicVrOO17M7jq70+xpb6Ry8YP5fnPX8bV5xxNZXnb/FF8eK8u3PyBs/n7h85hRK/OzFm+njN/eCcf+sMjrN6yo00+U5KKjWGJJOkNjh/ci8c+M40vX3QcleVl/OzRlzn2f27lzhedNFCSDsaG7Q188qbHmfj9Gcxeto6hPWr56wfO5uYPnM2wnp3bpYaLxw1h7ucv5YsXHENVeRk3PvkqY7/+d3726Euk05l2qUGSCpVhiSRpryrLy7j2gmN56qppnDy0N0s2bGPaz+/lQ394hA3b7WUiSXuTyWT4/dMLGHfd3/nJIy9RlkpxzdnjmPv5S7l0/NB2r6emsoL/vOh4nv3cJZx/5EDWb2/gyr88zqQfzODppWvbvR5JKhSGJZKk/Ro/sCczP3URX3/TiVRXZP9l8phv3MJtLyxNujRJ6lBeXr2JKT+9hyt+N5OVm3cwcURf6j77Jq67ZAJdqisTre3Ivt244yPn8Yf3nsmgbjU8sXgtp353Bv988xMG4JK0FxVJFyBJ6vgqysv43LlHc8nRQ/jwHx/l0UWrueyX9/PuE0fy3TefTO/Oh7eKQ1vKZDI0pTM0NKVpaEqzc4/XhsYmdjZl2JlOM6xHZwZ0q0m6ZEkFZsfOJn7+3Gp+/acXqW9M06u2iq9ffCIfOHkMZWUtWwq4LaVSKd5x3HAuCoP4z7ue5fsPv8iPZkX+MmcR37hkAv944sgWL10sScXKsESSdNCO6t+dBz95IT+cGbl2+mz+7+kF3Pvycr5z2ckcM7AHO9NpGhr3FUqkdx3fmU6zc1/nNWXDi12vjU1vOO9A996zhhZ9x37dOGfMAM4eM4CzR/enT5dObfSrKakY3PPScj550+O8vGYzAO87eTTXXXwifTvwfzu6dqrkm5eexPtOHs0n/vI4sxau5n3/N4sbHn+FH771FMYN6JF0iZKUOMMSSVKLlJeV8ekzx/KmcYP5pz8+ykPzV/Hu3z6cdFn7VV6Woqq8jKryMir3eK2qKKOyrIzyshQvrtq06+cnj7wEwDEDe3D2mAGcM2YAZ47qR8/ajtuLRlL7WbFpO9fc8hS/n70QgJHdqvjlFWdz1uj+yRbWAscM7MkDn5jCr5+az7/cVseDr67khG/dxlVnjeOLFxyT+NAhSUqSYYkk6ZCM6dONe6+8kJ8++hLXP/ISjek0VeXlVJandr1WlpdRVVFOZVmKqoryvYcVze8rXr+/Ys/je9xrb/fMv1dl2e7Xg+0Gv7MpzZOL1/DAqyt54JUVzFqwmueWb+C55Rv4wcMvkkrBCYN7cfboAZw9pj9njOpHt05VbfwrLakjaUqn+dljL3Pt7bPZuGMnnSrK+fcLj+HsrvWcVkBBSbOyshTvP2U0l44fwrXTZ/Pzx17mf+5/nj/MXsB33nwybx4/1KE5kkqSYYkk6ZCVlaW4clLgykkh6VJaRWV5GRNH9mPiyH782/nHUN/YxGOL1vDAKyt44JUVPLpoDU8vXcfTS9fx7QdfoLwsxUlDenP2mP6cM2YAk0b2o7bK/7VKxWr20nV8/KbHeGJxdhWZi44axA/eegqjenelrq4u4eoOT6/aan7y9tP4wClj+MRNj/P00nW8/cYHmTp2MN9/y8mM6t016RIlqV35JzpJkvahuqKcs0b356zR/fnSlOPY1tDIIwtX58KTlTyxZA2PL87+XHff81SWl3HqsD6cPaY/Z48ZwOnD+9KpsjzpryHpMG3esZMv3fkMP3g4ks5kGNSthu++5WTeesywout1ccqwPjz26an89JGX+eKM2cyYt4zxLy/nX887hs+dc7T/TZNUMgxLJEk6SLVVFZx/5EDOP3IgkP0L1MwFq7LhyasreXrpOmYuWMXMBav4r7ufo7qijIkj+uYmix3AKcN6J/wNJLVEJpPh5ucWc9XfnmLZxm2UpVJ8+syj+I8pxxX1ELzysjI+PjnwtuOG8flbn+a3dfP5jzuf5bd18/n+W05hylGDki5RktqcYYkkSYeoa6dKpo4dzNSxgwHYsL2Bh15dyQOvZnuePPvaeu5/ZSX3v7ISeJbaqnKO6dWJyzZUc/aY/kwY0puK8rJkv4SkvVqwdjOf+uuTzJi3DICTh/bmJ28/jROG9Eq4svbTv2sNv3r3JD546hg+edPjvLByI9N+fi9vO3YY377sJIb06Jx0iZLUZgxLJElqJT1qqrh0/FAuHT8UgDVbdvDg/JU88Ep2wtgXVm7k8RVbeXz6bAC6Vldyxqh+uaWK+3PcoJ6UlxmeSElqaGzi2w++wFfueo4djU1071TJf7/pBD5y2hEl+3yeNbo/T199Md97aB7/edez3DRnMXe8+BpfuvBY/vnMsVQa+koqQoYlkiS1kT5dOvG2Y4fztmOHA9mlRv/37kdZlK7lgVdW8PKazUyft4zpuX+57lFTxZmj+nHuEQM4e8wAju7f46BX8ikGDY1NrNvWwPrtDaQzGcpTKcrKUtnXFJSlUpSXpV73uvv9Hsdzx1Ipim5OCbWdB19dySduepx5KzcC8K4TRvDNS09iQLeahCtLXmV5GdecczTvPH4En73lKW6es5jP3/Y0v3rqVX70tlM5Y1ThrQQkSftjWCJJUjsZ0K2GC0d0Z8KECQAs3bCV+3O9Th54dQUL123llueXcsvzSwHo07mas0ZnV9o5Z8wAQr9uBfEX/+bQY922etZta2DttnrWbatnfd77ddsaWLc193579twt9Y1tUk9ZLmx5Y8Dy+v3NAcvugGYfQUz+tamy7PGy119flkrRtH0Lxy7LMKxHZ4b27MywHp0Z1rMzfTpXF0Q7lpLVW3bw+Vvr+PVT8wE4ok9Xfvi2U3fNT6TdhvbszJ/fdxYz5i3jn//6BM+v2MjZP7qL9540iusuPpF+XQ2WJBUHwxJJkhIypEdn3nPSKN5z0iggO0fC/a/snvNk2cZt3DRnMTfNWQzAgK41u1baOXfMAEb17tKmf+luaGxi/faGbOCxNS/kyAs81m6rZ/0eocihhh4VZSl61VbTo6aK8rIU6XSGdCZDUyb3ms6QzpD3fvdrOgNNmTTpNLvOT2cyZHLnpzPQmM608q/Qgd27eNMb9nWqKGdYz84M7VHLsFyIkh+mDOlRS02lf0RrD+l0hhueeIUv3PY067c3UFVexr+eN57PnzveVV8OYOrYwcwZcwnfuO95rrtvLr9+aj63PL+U/5p2fEkPWZJUPPw/sSRJHcTI3l0Z2bsrHzx1DJlMhlfWbOa+V1bsWqp4xebt/GH2Qv4weyEAQ3vU7lpp55wx/Rneq8te77uzKc36bfWszQs61m5tYP323e/zA5Dm1831Ow/pe5SXpehVW0Wvmmp6d66mZ20VvWqr6V1bnd1fW537ye3vnH3ftbqy1cOfzH6ClteFLrlAJZ3eM5zJBTHpdO4179pMJu/8N4Y4s1+IVPTsx+L1W1m8YStL1m9j8YatbNjewEurN/HS6jcGKc36dql+Q4gyNPc6rEdn+nXpVFJDtNrCc8vX8/G/PM4jC1cDcN4RA/jR207liL7dEq6scNRUVvClKcfxjxNG8qmbn+Su+BqfvOkJbnwiOzTnpKGuACapcBmWSJLUAaVSKY7o240j+nbjo6cfSSaTYd7Kjdz/ygruf2UlD766giUbtvGbp+bzm9zQgVG9u3DcoF5s2tGQ6xGSDUIONfQoS2VDj965cKNnbdWuYKM5/NhbENKtU+uHHocqlRtek8T8k/22rWDChPFv2L95x06WbMgGKIvXb82+X78t95rdXr2lntVb6qlbum6v964qL8uFJ7UM6fHG3ilDe9TSpbqyrb9iQdpav5Ov3P0c33nwBRrTGfp37cS3Lj2JfzhhRIf5fVtoxvTpxvR/OnfXMstPLVnLad+bzkdPP5L/mno8PWurky5RklrMsESSpAKQSqUYN6AH4wb04BOTjyKdzvDcivXc/3I2PHlo/krmr93C/LVb3nBtWSpFz5rdQUfPPcKN14UeuXN611bTtbrS3gttoGunyl1tuTdN6TQrN+/YFaYs3bBtj2BlK2u21vPq2s28unbzPj+nV23VXnunNA//GditpuSGStwydwmf/tuTLF6/lVQKrpx4JP817QR61FQlXVrBS6VSvO3Y4UwJg/jKXXP47kPzuP6Rl7hpziK+cckE3jNhlGGU1AE1pdNsrm9k046dbNzRwMbtO9lUv5ON2xvYuGMnm5v379i565xNee83bt9JUybDL955Om85ZljSX6dVGZZIklSAyspSHDeoF8cN6sVnzhpHUzrN7GXreWXNJnrWvH6ISzdDj4JSXlbGoO61DOpey2nD++71nG0NjbuCk/whPkuatzdszQ2pauCZ19bv9R4VZSkGd6993RCf3UN9svu7dSqOEGHx+q18+q9P7Jo8+YTBvfjx20/llGF9Eq6s+HSpruS6SybwnpNG8cmbn+Dh+av4wO8f4YbHX+GHbz2F8QN7tms9mdzcRRmyrwCZ5v2w6xjN7/P2Z89tvj57DGBTQxObdjS4ApcSV9/YtCvU2LRHqLFpj4CjOQTZtP315x1q79N8leVlicwL1tYMSyRJKgLlZWWcNLS3cwSUiNqqCkK/7oR+3fd6PJPJsHrLDhZv2Pa6Hin5gcrKzTtYtH4ri9Zv3efndK6qoKq8LLfKz+7Vf/a2stDrVg7KWxVoXysLpd6wstC+rtlj1aJ9LRv9hmuy7zft2Mn1j0a2NTTRtbqSL190HB+fFKhIYmxWCRk/sCf3f/xCflu3gM/fWsfD81dx4rdvp1dtVS6UaEGA0RxY7CPAaP4r2p73bFN/ifs8tL8VuMpzz9L+fs++YZWuQ3yWdq3QtY/ntDnTSZF9k0q9/n32WO41t2P39t737Xm/5u22ul/zd07lLTHf/JNK7T6+e9/e9+/r/AWLN7G4avFe7pN/7f73v7G21+9vTGfYuL0h15sjG2Rke3Ps7sWxMRd+bMrbv3H7Thqa0vv8fdgSXasr6d6pku41lXSrrqJbTXa7W6dKuneq2vW+W9777p2q6F6Tfe3WqZLqiuKbFNuwRJIkqcikUin6da2hX9eafQZoO3Y2sXTjVpbsGag0v9+wla0Njew7Siksbz9uON++7CQGd69NupSSkUqleM9Jo7h43GD+fcYz/PTRl1m9pT6hWnb/JTv/L+wp3hgS5J8Lr78ulUrR2NhIqqy8Q67ApTYwc2nSFexTRVnqdaFF906VdN0j4OjeKRt+dKuupHtN1RtCEIfc7pthiSRJUgnqVFnOmD7dGNNn76u/ZDIZNtfvpDG9txWEdq8Q9MZVhTJv+AvkXpd6Tr9+VaH8VYn2du/XrWq0z1WJ9rh37vXsMQM4/8iB7fwrrGY9a6v54dtO5WtvOpHtOxtf14Og+V/69xVg5PdI2H1ufk+I3dewx3VtNRymrq6OCRMm7PXY/lbg2vvv9X0/J025Z+mNS6jvZ5Wug3iWml+BN/TKyd+Z35Nnz+3M60/dNUQp/37N+9+wrxXvl2H3r0cmb2WyvYVXB9qfed052ffr1q2ne48eb9ifTmd29WzK35/Z43P2t7+53rIUu3pn7K3Hxq7Ao1Nz74+qXPBRSaeKcod9tSHDEkmSJL1BKpUqmjlL1DF0zf2rdzFLcgUutb79BWMqfj7GkiRJkiRJeQxLJEmSJEmS8hiWSJIkSZIk5TEskSRJkiRJymNYIkmSJEmSlMewRJIkSZIkKY9hiSRJkiRJUh7DEkmSJEmSpDwVSXxoCOFy4DqgCfhqjPGG3P4jgBl5p/YA/hhj/EQI4cvAm4GuwDdjjD/KXfM8UJ07/6EY4wfb5UtIkiRJkqSi1O5hSQihK/At4DSyYckzIYRbY4yrY4wvA2Pyzr0PuD63uQI4DugDzA0h/D3GuBSojjGOQZIkSZIkqRUk0bNkCvBgjHEZ7ApEzgP+kH9SCOEcYF2M8TmAGOOPc4dWhxCWAr2BpUCmvQqXJEmSJEnFL4mwZCiwKG97KTBwL+ddA3x9z50hhHOBLmR7l3QG+ocQ5ufu+fkY45MHKmDu3LmHUneHUFdXl3QJake2d+mwrUuL7V06bOvSYnuXDtu6dNjWpSuJsKQKSOdtp8kOx9klhDASGBpjfHiP/e8DrgUuizE2AVuBbrlj7wBuJhvG7Nf48eOprq4+0GkdTl1dHRMmTEi6DLUT27t02NalxfYuHbZ1abG9S4dtXTps6+JXX1+/z84USayGsxwYnLc9BFiyxznvBG7K3xFC+Fxu/8QY47w9bxpj/DNQE0Lo0arVSpIkSZKkkpJEz5K7gK+FEPqRDWsmAh/d45xLgE83b4QQhgLvBU6MMe7M298dqIwxrgkhTAXWxhg3tHH9kiRJkiSpiLV7WBJjXBFCuBZ4NLfrauDCEMLoGOM3QwjlwHhgTt5lRwMjgXkhhOZ9XwPuA+7J7VsBXN4OX0GSJEmSJBWxJHqWEGO8EbhxH8eagO577LuD7KSuezO6NWuTJEmSJEmlLYk5SyRJkiRJkjoswxJJkiRJkqQ8hiWSJEmSJEl5DEskSZIkSZLyGJZIkiRJkiTlMSyRJEmSJEnKk8jSwQkqB2hoaEi6jkNWX1+fdAlqR7Z36bCtS4vtXTps69Jie5cO27p02NbFLS8bKN/zWCqTybRvNQmqq6ubDDycdB2SJEmSJKnDOGPChAkz83eUWs+SJ4EzgOVAU8K1SJIkSZKk5JQDA8lmBa9TUj1LJEmSJEmSDsQJXiVJkiRJkvIYlkiSJEmSJOUxLJEkSZIkScpjWCJJkiRJkpTHsESSJEmSJClPqS0dXDBCCJcD15Fd4virMcYb8o6NB34H9ABuAT4dY0wnUacOTwihCvgucCZQDXwhxnhT3vEfAZcBO4D6GOPRSdSp1hNCeJ5sWwM8FGP8YN4xn+0iEUK4AviPvF0DgffHGP+cO+6zXeBCCNXAB4ELY4xvydv/aeBqYDvwmRjjjD2uOwv4OVAJ/CLG+N/tV7UO1d7aO4TQHbgeOA5IAx+PMT60x3W3A0cDjcCrMcYp7Vq4Wmw/z/YGYE1u8/9ijP9vj+t8tgvMPp7rLwAfzjttGDApxvhk3nU+1yXCsKQDCiF0Bb4FnEY2LHkmhHBrjHF17pQfA18A7gLuAy4F/pZAqTp8vYB7Y4wfDyEcCTwRQrglxrgzd7w38OYY41PJlahWVh1jHLOPYz7bRSLG+FvgtwAhhB7ATLIBWDOf7cIXgdlA1+YdIYTRwCfI/iF6KHBPCGF483/TQwhlwC+BtwKvArNDCLfHGJ9p59rVcm9ob7J/ifpxjPHhEMI5wC+AI/e4rjdwUoxxDSoUe3u2OwFLYozH7O0Cn+2C9Ya2jjF+Hfg6QAhhDPCb/KAkx+e6RDgMp2OaAjwYY1wWY1xB9i9N5wGEEPoCI2OMM2KMTWT/Ffqi5ErV4YgxrmjuSRJjfIlsQl2bd0ovYF0StanNZPa202e7qF0FXB9jrM/b57Nd+I4HvrfHvrcAf4oxbo4xvgAsBCbkHT8RWBFjnBNj3Ar8BZ/zQnE8e7R3jPG5GOPDuc2ngL57ua4HsL5NK1NrO543Ptu92H87+mwXpuN5Y1vn+3dgbz2EeuBzXRIMSzqmocCivO2lZLtwAwwBFu/jmApYCOEDwJwY48a83bXAvSGE2SGEf0yoNLWSEEJnoH8IYX4I4f4Qwsl5h322i1DuXyOvAP53j0M+2wUuxrhhL7v39//vgzmuDmof7Z3vGuCve9lfA7wcQngshGBX/QKwj7buARwdQng1hHBbrsdBPp/tArS/5zqEMAg4Gbh9L4d9rkuEw3A6piqyY1+bpckOxznQMRWoEMK/ApcD0/L3xxgn544fTbY791MxxphAiWoFuX9t6gYQQngHcDPZP2CBz3axeicwI9f2u/hsF60DPcc+50UmhFABfBsYT3YeoteJMQ7PnXcG8NcQwpiDCF7UweR6ivXODbe5CvgVMCnvFJ/t4vNPwA0xxjf0CPa5Lh32LOmYlgOD87aHAEsO4pgKUG6ix0B28qjlezsnxvg8MAsY2561qe3kJvqsyc1nAT7bxepdwJ/3ddBnu+gc6Dn2OS8iIYQU2dB7K9kJIjfv69zccJ2FwIh2KU5tIjfp+k/JzkuUz2e7+PwD+/n/N/hclwLDko7pLmBKCKFfCGEAMDG3jxjjYmBrCOHsEEI58B4O8CCr4wohnAaEGOP7Y4zb9nJ8TO51OHAq8Ez7VqjWFELoHkLok3s/FVjb/C8RPtvFJzfsagLZyV33POazXZxuB/4hhFAbQhhHdp6DZ/KOPwaEnM5kJ4O8uf3LVCt5J7A6xvivMcbGPQ+GECpDCMNy708gOyzj5XauUa0ghNA/hNAlt3kF8MQep/hsF5EQwhFAU4xx0V6O+VyXEIfhdEAxxhUhhGuBR3O7rgYuDCGMjjF+E3gf2e5/PYAbY4xv+IO4CsbxwEkhhFfy9v07MDjX1r/KjZncDlwdY1zY/iWqFfUiO+QCYAVweQjhLYDPdnE6Hng+N2Eve7S1z3YRijHWhRB+CzxPdlnoD8cYMyGET5INR38fQvgQcCvZbvvX7e0P4yoYxwOX7vH/8DcDZwNrgb8Dd+aWJ90AXLHnkDwVjFHAH0IIjcArZIdo4LNdtE4hO2nzLs1tjc91SUllMntdmEGSJEmSJKkkOQxHkiRJkiQpj2GJJEmSJElSHsMSSZIkSZKkPIYlkiRJkiRJeQxLJEmSJEmS8hiWSJIkSZIk5TEskSRJHUII4bkQwveTrkOSJMmwRJIkdRSTgKubN0IIZSGE0B4fHEIY1x6fI0mSCkNF0gVIkiQBxBg37bHrR8BY4Oy2/NwQwjuBPwCptvwcSZJUOOxZIkmSOqrKw7k4hJAKIRxMAHJYn5P3ef65SpKkIpHKZDJJ1yBJkkQI4RXgtzHG/wghLASG5x3+VYzx/SGEKuCrwHvJ9pC9D/hkjHFF7h4Lgf8DjgQuA04H1gD/DZwDdAUeAz4SY1wQQrgReF/e5yyKMY7I3etdwBeAo4CNwM3ANTHGLbnjNwIjgDuBa4H/AL6de30/0A94GTg3xrj6cH99JElS+/FfQCRJUkd0FvBn4AngCODzuf3fBqYC/5h77Uc2HMn3PuBp4GTgVbKByQrgXcAUYCjww9y5nweuyb0/Ive5hBDeD/wGuCl3/ZXAm4Bf7PFZRwLHAWfkzv048GngY8CpwI8P5ctLkqRkOWeJJEnqcGKMi0IIm4DtMcZXAEIIQ8iGEMfHGOfm9n0WeDKEMDjGuCx3+asxxq/m3e73uR9y11xPtvcHMcZVIYSVufev5F3zH8DPY4xfzm0/HULYDtweQvhi3rndyPZS2ZS795Fkg5m7YoyNwLOt8MshSZLamWGJJEkqFMcB5cBTe1kkZwTQHJY8kX8ghFBDtsfHuWR7ggxnP/OUhBD65s65e49DD+VexwHNYcmLe0xM+0vg3cDcEMJ3gF/HGLcf6ItJkqSOxWE4kiSpUDQHHJOB4/N+xgKz887bssd1twPvBH4KXAR88gCf05B7Te/jeNW+PivG+CzZ4Ty/Br4EzAkhDDzA50mSpA7GniWSJKmjSvP6P6u8mHvtE2N86mBuEELoRXZi14tjjLfn9n18L59DCKEixtgYY9wYQlgEnA/8Le+8M4AMsN/PjjGuB74aQvgxsBj4B+A7B1OvJEnqGAxLJElSR7UEeGcIYRKwNsb4YghhBvCz3FwlLwMnACfEGD+9j3tsBrYC7wshLAFOIdvLZM/PAXhvCOGZGOPT5OYsCSEsB6YDI8kGHjfGGBfuq+AQwlXAcmAu2eE6Nbk6JUlSAXEYjiRJ6qh+BjwP3At8ILfvvcBMsnODPEx2lZp793WDGOPO3DUnkV0y+CLgf/Y4bSbZYTM/AH6Uu+5G4FO5ax8Hvkd2dZyPHqDmbbn7PwX8F/DZGONtB/qikiSpY0llMpmka5AkSZIkSeow7FkiSZIkSZKUx7BEkiRJkiQpj2GJJEmSJElSHsMSSZIkSZKkPIYlkiRJkiRJeQxLJEmSJEmS8hiWSJIkSZIk5TEskSRJkiRJymNYIkmSJEmSlMewRJIkSZIkKc//B5oDNOEJk1n8AAAAAElFTkSuQmCC\n",
      "text/plain": [
       "<Figure size 1332x756 with 1 Axes>"
      ]
     },
     "metadata": {
      "needs_background": "light"
     },
     "output_type": "display_data"
    }
   ],
   "source": [
    "if __name__ == '__main__':\n",
    "    NGEN = 80\n",
    "    popsize = 20\n",
    "    low = [0,0,0]\n",
    "    up = [10,5,100]\n",
    "    parameters = [NGEN, popsize, low, up]\n",
    "    pso = PSO(parameters)\n",
    "    pso.main()\n"
   ]
  },
  {
   "cell_type": "code",
   "execution_count": 55,
   "id": "39e5bccb",
   "metadata": {},
   "outputs": [
    {
     "data": {
      "image/png": "iVBORw0KGgoAAAANSUhEUgAABCkAAAJsCAYAAADQs/mCAAAAOXRFWHRTb2Z0d2FyZQBNYXRwbG90bGliIHZlcnNpb24zLjUuMiwgaHR0cHM6Ly9tYXRwbG90bGliLm9yZy8qNh9FAAAACXBIWXMAAAsTAAALEwEAmpwYAADq1UlEQVR4nOzdd3hUZfrG8e/MpPeeEDqBDCk0Q+8d7Ehz3Z9rXde1r7r2vutasK19XV3L2ukKSpMuSK9JSIBQQoD03jMz5/cHGjcSIJRkErg/1+V1Me/7zpnnBIdk7pzzvCbDMBARERERERERcTazswsQEREREREREQGFFCIiIiIiIiLSTCikEBEREREREZFmQSGFiIiIiIiIiDQLCilEREREREREpFlQSCEiIiIiIiIizYKLswsQERGRls9qtXYFXgYGAe7ARqAV8HZqaurrv1n7ItAzNTV1nNVqPQC0/3nqKPAx8Fhqaqr2SBcREbkA6UoKEREROStWq9UdWAwsAtoAHYEPgFnAhHqechUw/X8eX86xn0kuB24GrmvEckVERKQZ05UUIiIicrbigNDU1NQ3f35cBnxqtVoTgAesVmtQampqPoDVao3nWIgx538P8POVE5utVusXwDDgkyarXkRERJoNXUkhIiIiZ+swYLFarY9arVbTL4OpqambgUMcu0LiF1cBS38JLerhDZQ2WqUiIiLSrCmkEBERkbOSmpqaBdwGPAVstFqt/f5n+re3fEyk7q0eAFitVrPVah3+87yuohAREblAKaQQERGRs5aamvofoDuQA6y1Wq13/Tw1ExhrtVo9rVZrB47dGjL3N0+fB9iBb4Arfr4CQ0RERC5ACilERETknEg95mLgTuBVq9XaDlgP5ANjOfGtHpcDYcA24Mamq1hERESaG4UUIiIick6lpqa+y7G+Eh1+bog5G7iS43f1+N/n5AB/AH5vtVqHNFWtIiIi0rxodw8RERE5K1artTcwCPgaKORYGOEAdvy8ZBbwGRDEsbCiXqmpqelWq/UV4A2r1ZqQmprqaMy6RUREpPnRlRQiIiJytvKBqUAqkAXcClyWmppa+PP8j4ArsCo1NbXgFMd6kWO3ftzaOKWKiIhIc2YyDMPZNYiIiIiIiIiI6EoKEREREREREWkeFFKIiIiIiIiISLOgkEJEREREREREmgWFFCIiIiIiIiLSLDTJFqSbN292B/oARwF7U7ymiIiIiIiIiDQ7FqAVsDEhIaHqt5NNElJwLKBY3USvJSIiIiIiIiLN2xCObVNeR1OFFEcBoqOjcXNza6KXbL4SExOJj493dhkiFzy9F0WcT+9DkeZB70WR5uFCeC9WV1eze/du+Dkn+K2mCinsAG5ubri7uzfRSzZv+jqINA96L4o4n96HIs2D3osizcMF9F6stxWEGmeKiIiIiIiISLOgkEJEREREREREmgWFFCIiIiIiIiLSLCikEBEREREREZFmQSGFiIiIiIiIiDQLCilEREREREREpFlQSCEiIiIiIiIizYKLswtwpjvuuIPdu3eTl5eHp6cnXl5e/O53v+Pmm292dmkiIiIiIiIiF5wLOqR4++23AXj44YcZMGAAV155Ze2cYRiYTCZnlSYiIiIiIiJywbmgQ4rfWr9+PW+88QYeHh4EBwfTtm1bLBYLt99+OwAjR47kiy++ICIigm+++Yb333+f6upqbrzxRq655honVy8iIiIiIiLSsimk+I3ExES+/fZb2rVrx1tvvVXvmv379zNnzhxmzZqFw+FgwoQJjB07luDg4CauVkREREREROT80WxCigfnbWbm9oPn9JiTe7Rn2uUJp/Ucq9VK+/btT7pmzZo1pKSk1N4eUlZWxuHDhxVSiIiIiIiIiJyFZhNSNBdeXl61f7ZYLDgcjtrHNTU1ANhsNiZMmMDDDz/c5PWJiIiIiIiInK+aTUgx7fKE077qobG1bt2axYsXA5CWlkZubi4ACQkJ3HPPPdxyyy0EBwezYcMG+vbt68xSRURERERERFo8s7MLaM7GjRtHZWUl119/PTNmzCA0NBSAbt26cc011zBp0iTGjBnDkiVLnFypiIiIiIiISMvXbK6kcKYXXnih9s/9+vWr/bOHhwf/+c9/ah//7+0dt9xyC7fcckvTFCgiIiIiIiJyAdCVFCIiIiIiIiLSLCikEBEREREREZFmQSGFiIiIiIiIiDQLCilEREREREREpFlQSCEiIiIiIiIizYJCChERERERERFpFrQFqYiIiIiIiEgLUVCWxTdbX8PLzY8JF92Hm4uHs0s6pxRSiIiIiIiIiDRzlTVlzNz0IjZ7NQDl1cWYMDm5qnNPIQXw8ccfM2PGDCoqKvDz8yMjI4OFCxcSEhJSu2by5Mk8+OCDrF+/ns8++wxfX1/MZjN//etfGTt2rBOrFxERERERkfOVw7CzJPFDjhal1Y75e4Zyec+7cLG4ObGyxnHBhxRbtmxh/vz5zJo1Cw8PDzIyMnjttddYsmQJ11xzDQAZGRnk5OTQu3dv1q9fz/XXX8/tt99OWloav//97xk5ciQuLhf8l1JERERERETOoc0HFrIzY0WdsSl9HsbbPcAp9TSFBn2ytlqtSYD7zw9Xpaam3mS1Wu8B7gcqgL+kpqYuaKQaG1VRURFmsxmLxQJAmzZtuOSSS/j0009rQ4pFixZx8cUXYzbX7TMaFRWFp6cnxcXFBAUFNXntIiIiIiIicv7Zn7Odlalf1hm7uPufCffr4JyCmlBDd/dwT01N7fzzfzdZrdYo4A4gDrgK+I/VanVttCob0eDBgwkLC+Oqq65i1apVAAwZMoRdu3ZRUFAAwMKFC7n00kuPe+6PP/5IYGCgAgoRERERERE5axWOAj7+8eE6AcXAzpO4YfALF0RAAQ2/3cP4zeOrgOmpqaklQLLVaj0AJADrzrSQjfu/50DujjN9er06hHSnT8dLTrrG1dWVt956i6VLl/L888+zbNkynn76aUaMGMEPP/zAoEGDKC4uplu3brXP+e9//8tnn31GUFAQH3300TmtWURERERERFqWGruDzRl59G0bgtl8+s0sK6pL+HrDP+qMdW01gH6drsBkOv+aY56MyTB+mz/UZbVavYGjQC5wEHgQuBZITE1Nff/nNdOBL1NTU+fUd4zNmzd3APaf7HWO1mynyJ5xuvWflL+lDa1cezR4fWVlJQ888AAPPfQQubm5LFq0iPj4eMrLy5kyZQoAM2fOxGKxMH78eF599VUGDRrE8OHDz2ndIiIiIiIi0vwZhsHSQyW8uz2bQyXV/GNQa8a09wfgYHEVWeU19I3wOcnzHeTZ93G0ZmvtmKcpkE7uIzCbLPU+JzW/gvcTc9lTUMkn4zsS4N5i+yN2TEhIOPDbwVOeTWpqahngB2C1WqcAs4H5gON/ljkA+6mOFR8fj7u7+wlmE0719EaRmpqKt7c3bdq0obS0FG9vb/r06UNoaCgfffQRJpOJ5557jqioKADWrl2LxWJh8ODBREVFcc0113DdddcRGhra4NfcvHkzCQnOOV8R+ZXeiyLOp/ehSPOg96K0dPfO3cgbq1N4fUIf7hzS9Zwff39eCU8s2EZ2aSWLbh2NyWRi2Z6jPPrdVjYeyqtd9+yGTKYM7cOLyxL5aMM+TCYoef4a3F3qBg6GYXC4IJV1ad9RWpNTO15TMoqhffvTKdj3uBq2ZOTxt8U7mJd07Jf7QzqFMaB3Al5uLSukqKqqIjEx8YTzp3U2qampM6xW67scu7Ki9f9MtQEOnVGFTlZcXMxdd92FzWbD29ubP/3pT0RGRgIwfPhwdu7cWRtQ/FarVq247rrrePbZZ3n99debsmwREREREZELXmFFNcGPf1372NWloW0X6/rlDoPkrCLCfTzw83Dlo41p2O0G6YVlvL5qF9V2ByM7R/D1tgP832c/1nuciho73V76liqbA2uoH69c2fu4gOJo0SGWJM/FYT+Mw4AfDwbwza4wCitdgUyuytrCzBuG1a7ffOhYODE/+Vg4YQ314x+X9mJCfNvz8laQU4YUVqvVH3BNTU3NtVqtFwN5wHfAp1ar9WWgAxAEbGvEOhtNnz59WLx4cb1zzz777HFjd911V53HN910U6PUJSIiIiIiIif25Zb9XPv5r2HBf64eyA196/8Fc32+S87gnjkbqbE7CPZ2p12gd+1VCr/Vys+TIZ3CmL7tIMv2Zp70uL7urjx3STx3DO6Kq+XX0GR7xiGWpswjwD0dswl2ZvowIymcw8UetWv6hHvz4mUXAbDpUB5/W7yd75IP19bw1Lge3NgnChfLmYUxLUFDrqQIAn6wWq0AmcDU1NTU7Var9TMgCagE/piamnry5hYiIiIiIiIiZ8nucBD34rfsyS2pHct6ZgohPh4nedav9uWV0Pe17ymoqK4dyygqZ/uRghM+52hxBdO3HTzlsS9qE0R+eRV/X7KTWwdGY3M4mLFtL0uSFzCkQzZBHgbphR7MSAwnOefXXhXebi7853cD6ViTQ0FFNVf8Z1ltOOHn4cpDI+O4e0hM7a0dh4vK8XK1EOh1onYKLVdDelLsB46Lo1JTU58DnmuMokRERERERER+a9vhfBJe/a728c39OvPvqQMa9Nzyahu3TP+Jr7YeaJTagr3c2ZKRD8CA9qHc+OWP5BZv44qYHEZF2cmvcGFOcjg/pftj8OttGg+NjOPR0d3YlVXEfTO2sObILgDcLGbuGGzlkVHdCPY+FkYcLS7nmUU7+M/6vVwS05pvbh7RKOfiTC2rw4aIiIiIiIicNxwOg4827mXasiQeHhXPjX07186t3Z/NtsMF3DYoGoDbZ63n3z/tqZ1/elwPwnw9yCur4u9LdpB4tID5fxyFh+vxTSo/3LCXP01f16CagrzcyC+vPvXC38grr/rlFamsTqNnaBYRnaqprDEzKymMH9KCqbb/epvGmOhWvH5VH4oqa/jdp6tZsOvYlRMmE1yb0IlnxvWgfdCxqy1KKmt4eUUSr65MprzaTnSoHw+MiDvtGlsChRQiIiIiIiLS5HYeLeCOmetZcyAHV4uZdgHeAFTZ7Dy1cDsvr0jC3WLh0tjWdPrHnDrPHdUlgqcXbQfgkflbKKqsIS7CHwODjMIyNmfkc0VcGxIzC+n58vzTqutMAopfdAwsZ2p8FtEh5dgdsHxfIN+mhFFc9etH7xBvd96d3J/W/p7c980mFqYcqZ0bFOnDW9cMp3tkIAA1dgfv/7SHvy3ZTk5pFUFebjx/yUXcOjC6Tr+L84lCChEREREREWkyZVU1/G3xDv65ahc2h0GEryczrh/KwI5hJB4t4Lov1rD9SAGt/DwZa42sE1BE+nmSW1bF0j2/Nq+sqLHz1Nju3DM0htdW7uL5pTspr7Y36TmFeFUzMTaLfm2LAdh61JeZieFkltbtGfHIqHhGRbfi5eVJdcKJvu2Cef7Si/AtOkz3yEAMw2DWjnQe/34re3JLcLWYuXdYDI+N7nZe9qH4XwopREREREREpFEtTDnMA99u5kBBKSHeHqQXlAHHPpzPvGE4rXw9+efKZB79fitVNgcDO4SyJSOfTzam1R7Dw8XCkeKKOscdHd2Ktyb2JTWnmD6vfU9aXglNycvVzmXWHEZ2ysfVYrC/wIPpOyPYnedd7/rnlyby/NLE2sfRoX48e0lPJnZrh8lkYvPmw6zel8XD87ew7mAuAFd1a8cLl/Wic4hfk5yTsymkEBERERERkUZxqKCM+77dxOwd6bVj6dXHAoob+kTx9qR+5JRWMva9JSzfm4XJdKxXw5LdR487VqXt16sjInw9eeXKBBLaBHPvN5tq+zk0FRezgxEd87m8ay7ebnZyy1yZlRzOxgy/Ok0xT+aGPlH8a0r/2ts2dmUV8deV6aw6nAxAQpsgXr6iN0OjwhvtPJojhRQiIiIiIiJyTtXYHby+ahdPLNhGtd1RZ85iNvHqFb25Y7CVL7ce4M5Z6ymqrCHIyw03i6XegOJ/3THIysOj4nl7TSo3frn2uOM3LoPerYuZFJtFmE8N5dVmpu8MZ+m+IGyOuj0ihnYKY9W+7BMeaXjnCFwtZo4UlfPM4u18uD4Nh2HUzi/58xj8Pd0a7UyaK4UUIiIiIiIics6sTMvizlnrSc4qOm4u2Mudr68fSs/IQP7vsx/5etsBAMJ8PMgurTzpca2hfvz3/waTllvCgNcXkFFU3hjln1DnoHKmdsskKqgCm8PE4r1BzE8Npay6/o/VJwsofrhtDAltgvjD5z/yxZb99a7x/M0uJRcKhRQiIiIiIiJy1jKLK3hw/mY+31z/h+6ekYHMunE4e3NL6PHyfA7/T8hwqoDijav6MLhTGPfN3cSKtKxzWfYphXlXMTkui4TWx/pdbDrsx6ykMLLLzqyBZdcwP2bvSGf0u0vqnX/p8gTuGx57xvW2dAopRERERERE5IzZ7A7+tXY3jy/YRklVTb1rpvZsz1sT+/Hskh28sTqlwceOjwjgq+uG8q+1qdz7zSbsDuPUTzpHfNxsXN41h+Ed83Exw948T6YnRpCW73XGx4yPCCAxs5CU7OLj5q7p1YF7Y7xISLhwAwpQSCEiIiIiIiJnaN3BHO6YuZ5tRwpOuOb5S3sxOroVw99eVO8tICcy4/phFFRUMeKdReSUVp2LchvE1exgdFQel1hz8XJ1kFXqxqykcDYf8YUGNsX8reFR4axIyyIxs/C4uUBPN7L/NhWz2cTmzZvPrvjzgEIKEREREREROc6RonLu/WYTF7UO4qFR8XXm8sqqeOS7Lfxn/d4640M6hbH6f3oxfHvzCBKPFjLwjYXUNLDBZftAbz6+ZhAPztvMxkN5Z38iDWTCoF/bIibGZhPsVUNptYUvtkewYn8gdsN86gPU46pu7ZizM/2Et6jkP3v1Bdkc82QUUoiIiIiIiEgdC1MOc/0Xa8gtq8LV/OvVAw6HwYcb9vLId1vIL6+uHW8f6M0jo7vx5xnrascW/GkUzy7ewZoDOQ1+3afGduftNamMeGfxuTmRBrKGlDE1PpMOgZXU2E0s2B3Md7tDqag5s+aV1/XuxH837WPOzvR655MfugJrmP/ZlHzeUkghIiIiIiIiwLGtQx//fisvr0iuHbtnaAwAWzPyuXP2etYdzK3znIdGxnF5XFsGv7mwduyVKxKY8slKSqtsDXpdk+nYbQ/PLN5xDs6i4Vr5VjI5LouerUoB+CndnznJYeRVnNnVDRG+nmSWVPDfTfvqnf/25hFcGtvmjOu9ECikEBEREREREQ7kl/J/n61m3cFcXMwmbA6DUV0iiA714545G3jrx9Q664d0CuPtSf1IziqqE1CM6hLB/d82vLdCxyAf9ueX1rkyo7H5uddwZUwOQzsUYDZBSo4X0xMjOFjoeUbHC/JyI7+8msySinrnX7j0Iv4yLIZVaVlc/d9V3D7IyrCo8LM5hfOWQgoREREREZEL3Owd6dwy/ScKK6r5/UUdySmtZMnuo7QJ8CbmxW/IKvl1i9BgL3emXZ7AtQkdeWrRdl5YmljnWEv3ZJ7Wa+/PLz0n59AQbhYHYzvncnF0Hh4uDo6UuDEzMYLtmT6cSVPMMB8PsksrTxiw/KF3J16+PIGkrCLG/msJq37u13FJTGuFFCegkEJEREREROQCVVlj54F5m3lnTSpebhY+uHoAA9qHEjftWwA+2ZhWZ/1NfTvzwmUXYTGbmPDRChbsOuyMsk+bCYNB7QuZEJNNoKeNokoL03e2YvXBQBzGme3YAZBdWlnveK/WQXx0zUCKKmq45tPVLNt7LLgZFhXOc5f2on/70DN+zfOdQgoREREREZEL0O6cYq757yq2HSkgPiKAL/8whHaB3vg/+tVxa+MjAnhncj8GdQxjV1YREz9awe6cYidUffriwkqZEp9JW/8qqmwm5qWEsHBPCJW2M2uKeTLebi5M7dmehSlHGPuvH2pDjO6tAnnu0l6M7xqJyXTmociFQCGFiIiIiIjIBeazzfu4feZ6yqpt3NK/C69e2ZsFKYfp9tK8Ouu83Cw8NbYH9wyNwdViZl7SIf7w+RpKqmqcVHnDtfGrZEp8JvHhZTgM+PFgAHOTwyiodG2U1xtrjWRx6hE+2vDr1Scdgrx5ZnxPft+rI2azwomGUEghIiIiIiJygSirquGuORv5ZGMavu6ufHHtEBLaBjH5k5UsSjlSZ+3lcW14fUIf2gf54HAY/GPJDp5atB3DcFLxDRTgUcNVsdkMbFeI2QRJWd5MT4wgo9ijUV4vPiKAxMxCFqfW/fr9c0Jv/jQgGneXc3/FxvlMIYWIiIiIiMgFYMeRAq75dBUp2cUktAnio2sGMWPbQW78ag1VNkedtV9dN5QpPdoDUFpVww1frmXOznRnlN1gHi52xnfJZWznPNxdDDKK3JmeGEFStk+jvF6ApxuFFdUkZhbWGX9ybHfuGxaLr0fjXLFxvlNIISIiIiIich4zDIN/r9vDfXM3UWmzc8/QrgzpFM6ED5ezL+/4nTWeGd+jNqBIyy1h4kcrjvsg3pyYTQZD2hdwZUw2/h52Citc+GJHGGsOBmCcwY4dDVVYUXdHjzsGWXlsTDfCfc9sG1M5RiGFiIiIiIjIeaqooppbZ6xjxvaDBHm58dLlCfyw5yivr1pZZ13PyEC2HSkgyMuNvwyNAWBJ6hGu+XQ1BRX1b6/pfAY9IkqZHJ9JpG81lTYzc5JDWbw3hGq7ucmqmNqzPf+4pBedgn2b7DXPZwopREREREREzkMb03P5/Wer2ZdXSt92wSS0CebB+ZupqLHXrgnycuOFyy6ipLKGbd9u5s7BXfF2c+HVFck8MG+zE6s/ufYBFUyNz6RraDkOA1bsD+SbXaEUVzXdLRbDosJ55Yre9GoT1GSveSFQSCEiIiIiInIeMQyD11ft4uHvtmJzOBjQPpScskreXbu7zrrr+0Tx4mUX4e/hSpfn5uLlZuHmfp2Z+NEKvk3KcFL1JxfsWc1VsdkMaFcEwLajPsxMCudoSeM0xaxPdKgf70zux4jOEU32mhcShRQiIiIiIiLnibyyKm78ag3fJR8GINTHnZ8O5tRZExvuz9uT+jE0KhyAjzbsJaOonCvj29L+77ObvOaG8HS1c2l0DqOj8nG1GBws9GD6znBSchunKWZ9fNxd+PB3A5nYrR0mk7YTbSwKKURERERERM4Dq/dlce1nP5JRVF47llNaVftnT1cLT4zpzr3DYnD7eVtMh8PgpWVJAHyTeKhpC24Ai8nB8I4FXN41B193O3nlrsxODmP9If9GbYr5W+9O7sdNfTvjYmm6XhcXKoUUIiIiIiIiLZjd4eCFpYk8vWgHDsOod80lMa15c2JfOgTVvfLgnTWppOYUN0WZp8kgIbKESXFZhPtUU15jZmZiGD+kBVPjaLqg4LlLenHXkK54uZ3bj865pZWUVtuO+/sQhRQiIiIiIiIt1tHicq77fA3L9mbWO9/G34t/XtWHCfFt69yiUFFj47aZ6/l0076mKrXBooLKmRKfSZfgCmwO+CEtiHkpoZRWN93H1/uHx/LwqHiCvNzP6XH35ZXwyopkPt6QhqvFTOFzvzunxz8fKKQQERERERFpgRanHuEPn/9IblnVcXMWs4l7hsTw1Lju+Lj/uuOFYRjM2pHO1f9d1ZSlNkiodzWTYrPo0+bYlR2bD/syKzmcrNJzGxSczPV9onhmXA/aBnqf0+NuycjjpeVJzNyejsMwiPTz5B+X9jqnr3G+UEghIiIiIiLSgtTYHTy1cBsv/txL4rf6tw/hncn96BFZd2vM7Ufy+f2nq0nJbl63d3i72bjMmsPITgW4mA3S8j2ZnhjO3rxzGxSczPiukbx0eQKxEQHn7JiGYbB0TybTliWydM+xK10ifD15eFQct/SPxsPVcs5e63yikEJERERERKSFSC8o49L3l5KcVXTcXKCnG89fdhE39+2M2fzrrR05pZU8uXAb//5pT1OWekouZgejOuVzmTUHLzcHOWWuzEwKZ9NhP2iippg9IwN5c2JfBnYMO2fHtDsczNqRzsvLk9ickQ9AmI8HD42M49aB0Xi66mP4yeirIyIiIiIi0gLM3ZnOpI9X1jv3h96dmHbZRYT5etaO1dgdvLMmlfu+2dRUJTaICYM+bYqZFJtFiHcNZdUWvtoRzvL9QdiaqClmmI8HH1w9gEtiWp+z7UQramx8vDGNV1cksy+vFIAQb3ceGBHHbQOj8f6f227kxBRSiIiIiIiINGNVNjuXvb+s3uaYXcP8eHtSP4Z3jqgzvjDlMPd/s6nZ3doRHVzG1G6ZdAyspMZuYtGeYOanhlJe03S3Pnx0zUD+76KOWMznJhApKK/i3bW7eXN1CtmllQAEebnx1+Fx3DHYWqcniJyaQgoREREREZFmamtGPr1f++64cQ8XC4+P6cb9w2Nxc/n1A/7unGLu/2YT3+863JRlnlKETxWT47Po1aoEgPWH/JidHE5uuVuT1fDqlb3588Bo3F3OTSCSUVjGP1ft4v11eyitsgHHbrm5b3gsdw624ufRdOd2PlFIISIiIiIi0swYhsHkT1Yyd+eh4+bGd43kzYl96RTsWztWVFHNs0t28sbqXdgcRlOWelK+bjauiMlmWIcCLGbYnevF9MRw9hd4NVkNj40+Fub4e56b0CA5s5CXVyTzxZb91NgdAPh7uHLvsFjuHtL1nL3OhUohhYiIiIiISDOy7XA+Ca8ef/VEpJ8n/7yqDxO7tavto2B3OPhwQxpPLNhKTunxW5E6i5vFweioPC6JzsXT1UFmiRszk8LZetSXpmqK+eeB0TwxpjsRfp6nXtwAa/ZnM21ZEvOTM2rH/DxcuWdIDH8ZFkOAwolzQiGFiIiIiIhIM1BebeMPX/x43NUTZpOJu4ZYeWZcT3w9fu1vsCoti3vnbmTbkYKmLvWETBgMaFfEVbFZBHnaKKmy8Nm2CFYdCMJuNE04MaFbW1687CI6h/id9bEcDoPvdmXw0rIk1hzIqR33cXfh7iFduXdYLEFe7mf9OvIrhRQiIiIiIiJONi/pEBM+XHHceN92wbwzqT+92gTVjqUXlPHgvM3M2H6wCSs8tZjQUqbGZ9EuoJJqu4nvUkNYsDuEClvTNMXs3iqQD64eQELb4LM+VrXNzpdbD/Dy8qQ62716u7lw52Ar9w2LJcTH46xfR46nkEJERERERMRJDuSXcvNXa1mRllVn3N/DlecuvYhb+neu3YWivNrGS8uTeO6Hnc2q70Rr30qmxGfRLaIUhwFr0v2ZkxxOQUXT7GphMsGiP41mVHSrsz5WSWUNH6zfwz9X7iKjqLx23NPVwh2DrPx1RByhCicalUIKERERERGRJlZls/PKimSeWLDtuLn/S+jIS5cnEO57rJeCYRh8tfUA137+YxNXeXIBHjVcGZPN4PaFmE2wK9ub6YnhpBedmx4QDfHVdUOZ3P3XHh1nKrukgjd/TOGdNbsprKiuHfdwsXDboGgeGBFX+/chjUshhYiIiIiISBP6YfdR7pq9gd05xXXGOwX78N6U/ozs8usVAfOTM7jyP8ubusSTcrfYGdclj/FdcnF3MThc7M6MxHB2ZvnQVE0x35rYlz/274KrxXxWx0nLLeHVlcl8vCGNSpu9dtzdxcytA6J5cGQcrfyabicSUUghIiIiIiLSJA4XlXP/N5vq7SXxzPgePDAiDncXC+XVNv79027u/3azE6o8MbPJYHD7Aq6MySHAw0ZhpQtf7Qzlx4OBOJqoKebDo+J5dFQ83u5ndyvJlow8pi1LYtaOdBzGr7fOuFnM3NK/Cw+Niqe1v8IJZ1BIISIiIiIi0ohq7A7e+jGFpxdtp7TKVmeue6tAZtwwlE5Bvvy4P5sP1u/h8837nVTpiRh0Cy9lSnwWrf2qqLKZ+GZXKIv2BFNlb5qmmJO6t+Pdyf0J9j7znTQMw2DpnkymLUtk6Z7MOnOuFjM39e3MI6PiaRvofbblyllQSCEiIiIiItJIVu/L4s5ZG0jMLDxu7vNrB9OnbQifbtrHZ5v3sT+/tOkLPIV2/hVMjc8iJqwMhwGrDgTwza4wCiubpilm5xBflvx5DO3OIjiwOxzM2pHOS8uT2JKRX2fOxWzihr5RPDqqG+2DfM62XDkHFFKIiIiIiIicY9klFTw0fwv/3bTvuLmOQT7cPsjKOz+msuZA82qG+YtAzxomxmbRv20RZhPsyPRhZmI4h0uabmeLAE83Vt85jrAzbFhZUWPj441pvLoimX15dQMgi9nEdb078djobnQM9j0X5co5opBCRERERETkHLE7HPx73R4e/35bnV0ifhHo6caR4nIemNe8+k38wtPFzsXRuYzpnIebxSC90IPpieHsymn6qwx83Fw4k41WC8qreHftbt5cnUJ2aWWdObPJxLUJHXlsTDc6h/idm0LlnFJIISIiIiIicg5sTM/lztkb2HQo74RrCiqq6RziS5XNzqHC8ias7uQsJoOhHfK5MiYHX3c7+RUuzEkO56d0f4wm2rHjF2E+Hjw0Mo5bB0bj6drwj6wZhWX8c9Uu3l+357jeH2aTiWsu6sDjY7oTHapwojlTSCEiIiIiInIW8surePz7bfx73W6ME/zqP9DTjd/16kC7QG++2LKfvbklTVvkCRn0alXC5LgsInyrqagxMyspjB/Sgqm2n932nqcr2MudB0bEcfug6NPavSM5s5CXVyTzxZb91NgddeZMJri6ZweeGNOdruH+57pkaQQKKURERERERM6Aw2HwyaY0Hp6/hdyyqnrXDI8K547BXYkN9+fxBdt4d+3uJq7yxDoGljM1PovokHLsDli2L5Bvd4VRUt20HxMDPd24f3gsdw7uiq9Hw8OJNfuzmbYsifnJGfXOT+nRnifGdicuIuAcVSpNQSGFiIiIiIjIadpxpIA7Zq1n7YGceuejgn1Zc/d4PF0tvLA0kWs/X02VzVHv2qYW4lXNpLgs+rYpBmDrEV9mJoWTWXrm23ueCT8PV+4dGsM9Q2Pw93Rr0HMcDoPvdmXw0rIk1pzga39Vt3Y8ObY73SMDz2W50kQUUoiIiIiIiDRQcWU1N3y5lm8SD51wzdb7LyM+IoD31u3mzlkbmrC6k/N2tXGpNZeRnfJxtRjsy/dkRmI4u/POfHvPM3XvsBgeG92NQK+GBSPVNjtfbDnAKyuSSM4qAsDH3YWyalvtLTZXxLXhqXE96Nk6qLHKliagkEJEREREROQUiiurmfLJKn7YffSEa67r3Yk3J/Zlx5ECXB/4rAmrOzkXs4ORnfK5zJqLt5ud3DJXZiWHszHDr8mbYsKxEKehVzmUVNbwwfo9/HPlLjKKynExm+gY5ENJVU3tLTaXxrbmqbE9SGgb3JhlSxNRSCEiIiIiIlIPu8PB0j2ZPP79VjZn5J907cfXDGJUlwja/312vVuPOodB79bFTI7LItS7hrJqM9N3hrN0XxA2R9M2xQRYc/d4+rcPbdDa7JIK3vwxhXfW7KawohpvNxf6tgumoLyaPT83HR3fNZKnxvWgb7uQxixbmphCChERERERkf+RlFnIp5v28f66PacMHLq3CuTj3w/k6YXbueHLNU1U4al1Di5janwWUUEV2BwmFu8NYn5qKGVN3BQTYNGtoxkd3apBa9NyS3hlRTKfbEyj0mYn1MedS2Jak11ayYb0Y1u7joluxdPjezQ48JCWRSGFiIiIiIhc8HJKK/lq634+3bTvlFdN/OK2gdFE+Hly0SvfNXJ1DRfuU8WkuCwSIo9dbbAxw49ZyeHklDWsMeW5NPOGYVzVrV2D1m7JyGPasiRm7UjHYRh0DPJhaFQ4B/NL+X7XYQBGdYngqXE9GNQxrDHLFidTSCEiIiIiIhekKpud75IP899NaSzYdRibw2jQ8/w9XPm/hE68sya1kStsOB83G1d0zWFYx3xczLAnz5MZiRGk5Xs1eS0f/m4g1/eJOuU6wzBYuieTacsSWbonE4BerYMY1SWCnZmFfLIxDYBhUeE8Pa4HQ6PCG7VuaR4UUoiIiIiIyAXDMAw2pOfy6aZ9fL3tAPnlx27n6BrmR1ZJJQWnuL2jtb8Xh4vKm01A4Wp2MLpzHpdE5+Ll6iCr1I1ZSeFsPuILTdwU858TenPn4K6YTCd/XZvdwawd6by8IoktP1+1MqpLBOOskfy4P5uXVyQDMLhjGE+P78GIzhGNXrs0HwopRERERETkvHeooIzPNu/j0037SM0pBiDc14P7hsUS7uvB++v2HBdQuFrM+Lq71AYZAIeLypu07hMxYdC/bRFXxWYT7FVDSZWFL7ZHsGJ/IHajaZtiPjO+B4+O6obZfPJwoqLGxscb03h1RTL78koxm0xM7tGei7u2Zn5yBg/O3wLAgPahPD2+B6O6RJwy8JDzj0IKERERERE5L5VW1TB7ZzqfbdrHsr2ZGAa4u5iZ2rM91/WOIibcnwfnbebVlcnHPbdX6yCq7XaSMoucUPnJdQ0pZUp8Fh0CK6mxm1iwO5jvdodSUWNp0jruHRbDC5dehIvl5KFIQXkV767dzZurU8gurcTdxcytA6IZ3zWSz7fs5+av1wLQt10wT4/ryVhrK4UTFzCFFCIiIiIict5wOAyW783k0837mL0jnbJqG3Ds1oFre3diSo/2eLu58PqqXVz931W1878I8/FgSo/2vN1Mbuf4X618K5kSn0WPiFIAfkr3Z05yGHkVTdsU89qETrw3pT8ericPRQ4VlPH66l28v24PpVU2AjzdeGRUPGOskby3djcTP16BYUBCmyCeHt+Ti7tGKpwQhRQiIiIiItLypWYX8d9N+/h88z4OFR67JaNjkA9/6N2JaxM6ERXiC8DKtCzumr2+3iskurcKZMfRgmYXUPi513BlTA5DOxRgNkFKjhfTEyM4WOjZpHX0iAxk1Z3j8HF3Pem65MxCXlqexBdb9mNzGLT29+KpsT0YFhXOP1ftYvS7S3AYBj0jA3l6fA8ui22jcEJqKaQQEREREZEWKb+8iq+3HuC/m9LYkJ4HgK+7Kzf17cx1fToxqENYbZ+EzOIKHpy/mc837weO9ZuosTvqHG/H0YKmPYFTcLM4GNc5l/HReXi4ODhS4sbMxAi2Z/rQ1E0xc/4+lSAv95OuWbM/m2nLkpifnAEca0b61xFx9G8fyrRliTw0fwsOw6B7q0CeHNedCfFtFU7IcRRSiIiIiIhIi1JlszNtWRLPL91Jlc2B2WRiXNdI/pDQiSvj2+Ll9uvHHLvDwb/W7ubxBdsorqypHf9tQNGcmDAY1L6Qq2KyCfC0UVRpYfrOVqw+GIjDaNoP9X8ZGsMrV/Y+4bzDYTA/OYOXliex9kAOAAM7hPLAiDjiIgJ4fulObp2xDrvDIC7CnyfH9mBit3anbLIpFy6FFCIiIiIi0mKsSsvitpnrSMkuJtLPk3uGxvD7izoS6e913Np1B3O4c9YGth7Od0KlZyYurJQp8Zm09a+iymZiXkoIC/eEUGlr2qaYv4jwrf+WkmqbnS+2HOCVFUkkZx27debS2NY8OCKetgFePLd0J1M+WYnNYRAT7s8TY7ozpUd7hRNySgopRERERESk2csrq+Kh+Zv5aEMaJhPcMcjKs5f0xM/j+KaReWVVTP1kJSvSsuo9ljXUr3Yb0uaijV8lU+MziQsvw2HAjwcDmJMcRmHlyfs/NJax1kieu6QXvdoE1Rkvqazhg/V7+OfKXWQUleNiNvGH3p346/BY/D3ceH5pIh9u2EuN3UF0qB9PjO3O1T3bYzE37bao0nIppBARERERkWbLMAw+27yfv367idyyKnpEBvKvKf3p2y7kuHUbD+Vx1YcryCypqPdYl8W2ocbhYFHKkaYovUECPWqYEJvNwHaFmE2QmOXNjMQIMoo9nFJP33bBPHfpRYzoHFFnPKukgrd+TOGdNbsprKjG282FvwyN4Z6hMVjMJl5YmsgH6/ZQbXfQOcSXx8d055peHU65PanIbymkEBERERGRZmlPTjF3zFrP0j2ZeLlZeOnyBO4e0rX2g2+N3cGqtCzmJh7inZPsyJHQJggfd9faho7NgYeLnYu75DKmcx7uLgaHityZkRhBUraPU+qJDvXj2Ut6MrFbuzrNLNNyS3hlRTKfbEyj0mYn1Medv43vwW2DrFTZ7Ly4LIl//7SbKpuDjkE+PD6mO9cmdFQ4IWdMIYWIiIiIiDQr1TY7Ly1P4h8/HGuMeXFMa96a2JcOQcc+wBuGwcvLk3lhWSKFFdXHPd/dxUyVzYGXm4UgT3c2ZzSfnhRmk8HQDgVc0TUbfw87BRUufLEjjDUHAzCaeMcOgFZ+njw5tjs39e1cJ1jYkpHHtGVJzNqRjsMw6Bjkw/3DY7mhbxTFlTX8Y8lO/rV2N5U2O+0DvXlsTDeu6x2Fq8IJOUsKKUREREREpNlYvS+L22auZ1dWERG+nvzzqj5M7v7rb/cdDoP7vt3Em6tT6jzP38MVf0830gvKqLId27mjvNpOeXV5k59D/Qx6RJQwOT6LSN9qKm1m5iSHsnhvCNX2pv9g7+/hykMj47lrSNfa3VAMw+CH3Ud5aXkSS/dkAtCrdRAPjIhjUvd2FFRU8/TC7by9JpWKGjttA7x4dHQ3bugThZuLcxp7yvlHIYWIiIiIiDhdfnkVD8/fwn/W78VkgtsGRvOPS3rh7/lrY8wau4ObvlrLF1v21455uFhoE+BFVkkl6QVlzij9lNoHVDA1PpOuoeU4DFixP5BvdoVSXNX0TTHdXczcNbgrD42KJ8jLHQCb3cF/Nuzl9pnra9eN6hLBAyPiGB3divzyap5cuI23fkylrNpGa38vHhkdz019O+OucELOMYUUIiIiIiLiNIZh8OXWA9z/zSaySyvp1iqAf03pT//2oXXWlVfbuOyDZaz8nx07ooJ9qbbb2Ztb0tRlN0iwVzUTY7Pp3/bYFp3bjvowMymcoyXOaYp5U9/OPDWuO20CvIFjX9M/fv0TX287UGfdhr9cQkLbYPLLq3hy4TbeWJ1CaZWNVn6ePHdJL/7YvwsergonpHEopBAREREREadIyy3h9lnr+WH3UTxdLbxw6UX8ZVjMcX0NCsqrCHlieu1jbzcX2gd6k5xV1NQlN4inq51Lo3MYHZWPq8XgQIEH0xMjSM31dlpNK+4Yy5BO4QCkZhcx4PUFFFXW1FkzqksE//39YDxcLTy9cDuvr95FcWUN4b4e/G18T/40oAuervoIKY1L/4eJiIiIiMg5V1ljp8buwNfj+Fsaqm12Xl2ZzN8X76TSZmdc10jentiXjsG+x639cV82w95eVPs4LsKfo8UVzTKgsJgcjOhUwOVdc/Bxs5NX7srs5DDWH/J3SlNMgDk3DueK+LbYHQ4+WLeHW2esO27N4I5h/HtqfyJ8PXljdQqvrUymqLKGUB93Xro8gT8PjK7tWyHS2PR/moiIiIiInDOGYTB920HumbuBtgHebLz30jrza/Znc9vMdSRlFhHu68GHVw5kas/2dba9BKiosXHrjHV8vvnX/hMWs4mkzOYXToBBQmQxk+KyCfepprzGzMzEMH5IC6bG4ZzdLj64egA39Ikio7Ccaz5dxfRtB49b06t1EG9N6ktceABv/pjCqyuSKaioJtjLnRcuvYjbB0Xj7d70fTPkwqaQQkREREREzonDReXcMWs985Iy8HCxcOuA6Nq5gvIqHvluK++v2wPArQOiee7SXgT8T2PMXyzYdZjLPlh23LjdYTRe8WcoKqicqfGZdA6uwOaAH9KCmJcSSmm1cz5qvXjZRdw1pCsLdh0m+PGvj7ulAyA61I+Xr0hgWFQ4b/+YyhUfLCevvIpATzf+cUlP7hjUtd4rYESagkIKERERERE5Kw6HwQfr9/DQ/C0UV9YwqEMoH/xuINGhfhiGwdfbDnDfN5vIKqkkLsKff03uz8COYccdJ72gjEvfX9osb+X4rTDvKibFZdO7dTEAmw/7MjMpnOwyd6fU88CIOP7QuxOfbtqH10Nf1Lumjb8Xf7u4JxO7teO9n3Zz01dryS2rIsDTjb+N78FdQ7ri53F8aCTSlBRSiIiIiIjIGduTU8ytM9axMi0LLzcL/5zQmzsGdcVsNrE/r4TbZ21gceoRPFwsPHdJL+4dFoPb/2xbWVpVw6LUI0z9ZJUTz6LhvN1sXG7NYUSnAlzMBmn5nkzfGcHefC+n1HNNrw4M7hTOF5v38dLypHrXBHq68ejobtzYN4qPN6YR/fxcsksr8fNw5amx3bl7aEy9V7SIOINCChEREREROW02u4PXVu7i6UXbqbTZGdE5nH9PHUCnYF9q7A5eXpbE3xbvoKLGzpjoVrw9qR9RIb4YhkFSZiELdx1mUeoRlu7JdPapNIiL2cGoqHwui87By81Bdqkrs5LC2XTED5zQFDMq2JeEtkHM3JHOl1sP1LvGw8XC3UO6cs/QGKZvO0D8tHlkllTg6+7K42O68ZehMQR6OefKD5ETUUghIiIiIiKnZdvhfG6Z/hNbMvLxdXfl1Qm9uaVfF8xmEz8dyOG2mevYebSQMB8P3p86gEtjW7N0TybTlieyKOUIhwrLnX0KDWbCoG+bIibGZhPiXUNZtYWvdoSzfH8QNic1xQz1cSctr4S0vJJ6580mEzf0ieLhUfEsSjlCn9e+40hxBd5uLjwyKp57h8US7K1wQponhRQiIiIiItIglTV2/r5kBy8tT8LuMBhrjeS9Kf1pF+hNYUU1j32/lfd+2o1hQL92IQyLCuf9dXu44cs12H5ueunXghoyRgeXMbVbJh0DK6mxm1i0J5j5qaGU11hO/eRGlFNadcK5K+La8NS4Hqw7mMvIdxaTUVSOl5uFB0bEcf/wWEJ9PJqwUpHTp5BCREREREROafW+LP40fR27c4rx93Dl1Sv7cH2fTgBM33aAG79cS6XNXrt+fXou69NzMZmgd5tgxnWNJMDTjY83pJGYWeiks2iYCJ8qJsdn0avVsSsV1h/yY3ZyOLnlzadvg4eLpc7Xe2CHUP52cU/25pZw1UcrSC8ow9PVwn3DYnlgRCxhvp5OrFak4RRSiIiIiIjICRVXVvPod1t5d+1uAC6LbcO7k/sR4evJnJ2HmPLJyuOeE+LtzlhrJOO6RjLOGokJePi7LTy7ZGcTV396fN1sXBmTzdAOBVjMsDvXi+mJ4ewvcE5TzPp0CvYBIOPnW2Ziwv15elwPiitruOXrn9ifX4qHi4V7hnblwRHxRPgpnJCWRSGFiIiIiIjU67vkDG6fuZ6MonKCvNx4elwPgrzceXDe5uOaNYZ4u3Pn4K6M7xrJRW2CsJjNtVuTPvb9VvLLq51zEg3gZnEwJiqPi6Nz8XR1kFnixoykcLYd9cUZTTHrM7hjGD7uLmxIzyW/vJpIP08eH9sdV7OZR7/bSlpeCW4WM3cOtvLQyHgi/ZtPsCJyOhRSiIiIiIhIHTmlldw7d2OdIMLfw42/zN2EwzDqrL00tjUf/W7QcY0YNx/K487Z69mQntcUJZ8REwYD2xUyITabIE8bJVUWPtvWilUHArEbzg8nzCYTE7q1pY2/F98kHuJgQRn+Hq78/eKehPp48MryJPbkluBqMXPbwGgeHhVPmwBvZ5ctclYUUoiIiIiICACGYfDG6hTu+2bTcXP780vrPL6hTxTTLk84LpworKjmiQXbeGdNaqPWerZiQ0uZEp9Fu4BKqu0mvksNYcHuECpszmmK6WI+ForYHAbuLmZu6NOZ2HB//rN+L7N3pONmMXPP0K50Dvbj7TUppGQX42I28acBXXhkVDfaBSqckPODQgoRERERkQuY3eFgR045b3+1lk82ptWZc3cx8/uLOlJebWde8iHKq+10DfPj3cn9GRoVXmetYRh8tnk/N3y5pinLP22t/SqZEpdFt4hSHAasSfdnTnI4BRXO2XWkfaA3uWVVlFXbCPB047aB0fTvEMprK5J576fdmExwbUInurcK4OONabyelYLFbOKmvp15bEw3OgT5OKVukcaikEJERERE5AKTWVzBotQjLEw5zOLUoxRW1O0XMbhjGG9O7Iufhyt3z9nAd8mHcXcx88z4HjwwIg53l7pXGyQeLWD8v5dytLiiKU/jtAR41HBlTDaD2xdiNkFytjczEsNJL3JOY8mYcH/25BRzsKCM1v5ePD2uB8M7h/PisiSeX5oIwPiukfRrF8Lsnel8tnkfFrOJ6/tE8djobkSF+DqlbpHGppBCREREROQCsDe3mI82pLEo5QhbD+fXu2ZS93b8e+oAfNxceGN1Ck8t2kZ5tZ2RnSN4e3I/okP96qwvrarhhi/XMmdnelOcwhlxt9gZ3yWPcV1ycXcxOFzszvTEcBKzfHBGU8xgL3fyyqvYlVVETLg/fx0ex8guEby4LJFHvtuCzWHQp20wAzuGsmJvFs8s3oHZZOLahE48PqYbXX7zdyByvlFIISIiIiJyHquy2XlxaSLPL02k2u7A1WJmaKcwEjMLa3fciPBy5aNrhzLWGsnG9Fz+PGMd244UEOzlztuT+vGHhE6YTL9+oDcMg1dXJPPg/C3OOq1TMpsMBrcvYEJMDv4eNgorXfhyRxhr0gNwOLEpZl55FQM7hPLAiDiGRYXz6spk4qatp7zaTpcQXwZ2DGPHkQJeX5WCyQTX9OrAE2O7Yw3zd1rNIk1JIYWIiIiIyHlq+d5M7pi5ntScYiL9PHn+sotoF+DNX+ZurA0o/jwwmqmtTfRqH8I9czbw9ppUDAOu7xPFtMsuIsTH47hjjn53iTNOp4EMuoeXMjk+i9Z+VVTZTHyzK5RFe4KpsjunKeYvLottwwMj4ujbLph//7QH6wtzySmtIsLXk9FdgkkvKOOTjWmYTDC1Z3ueGNOd2IgAp9Ys0tQUUoiIiIiInGdySit5YN5mPt20D5MJ7hxs5dHR3Xht5S5u+motdodBp2Af/j11ACM6R/Dy3OX8Ydo8DheVEx3qx7uT+zG8c0SdY2YWV9D6mZlOOqOGaedfwdT4LGLCynAYsOpAAHOTwyiqck5TTDi2a8fvL+rIX0fEERPmz9fbDnDjV2vYl1eKr7srQzqFUVBezbdJGcCxW26eHNud+FaBTqtZxJkUUoiIiIiInCccDoOPNu7l4flbyC+v5qI2Qbw7uT+lVTUMfWsRe3NLMJng7iFdefbinuSXV3PVh8v5NikDN4uZp8Z256FR8XUaYxqGwe8/W830bQedeGYnF+RZzVWx2QxsVwTAjkwfZiaGc7jE4xTPbDzebi7c0r8LfxkaQ9tAb5akHuH6L9aw9XA+rhYz8REBVNsdrN6XDcCEbm15cmx3ekQGOa1mkeZAIYWIiIiIyHkgObOQ22etZ/W+bHzcXXjtyt5c27sTj363lffX7QEgOtSPD64eQL92Iby9JpUnFmyjrNrGRWFefHrDaLqG1+17MC/pEBM+XOGEs2kYTxc7F0fnMrZzHq4Wg/RCD6YnhrMrx3nbcob6uHPX4K7cNshKkJc7WzLy+OP0n/hh91EA2vh7YTJBYmYhAJfHteGpsT3o1UbhhAgopBARERERadEqamz8Y8lOXl6RTI3dwYRubXl9Qh+2ZOTT46V5HCmuwGwycf/wWJ4a153kzCIGvLGALRn5BHm58cZVA4k3F9QJKHJKK4l4aoYTz+rkLCaDYR3zuaJrDr7udvLLXZidHM66Q/4YTtixA6BDkDd/HRHHDX2i8HR1YV9eCXfN3sBXWw8A4Olqwd3FQkZROQCXxLTmqXE96N022Cn1ijRXCilERERERFqoRSlHuHP2evblldIu0Js3rupD33Yh3DNnIzO2H7s9Iy7Cnw+uHkhMmD+Pfb+VN1en4jAMruvdiWmXJxDq48HmzZuBY7d2DH1rEWsP5DjztE7CoFerEibHZxHhU01FjZlZSWEs2RtMjcPslIpiw/15fEx3JnVvh4vFTHZJBQ/P38J7P+2hxu4AwGSCiho7FTV2xnWN5Kmx3enXPtQp9Yo0dwopRERERERamMziCu77ZhNfbzuAxXzsKoknx3Zn9s504qd9S355NRaziYdHxvPYmG4sTDnClI9XklFUTpcQX96Z3I+RXVrVOeasHQeZ+skqJ53RqXUMLGdqfBbRIeXYHbA0LYh5KaGUVDvvI83CP41idHQrTCYTpVU1/HNZIi8tT6K0ylZnnWHA6OhWPD2uBwM6KJwQORmFFCIiIiIiLYTDYfDeut089t1Wiipr6NcuhHen9CPAw40pn6xiceoRAHpGBvLB1QMJ9XHnmk9X803iIVwtZh4f041HRnXDw/XXxph5ZVX0/SLZWad0SiFe1UyKy6Jvm2IAth7xZUZSOFml7k6r6dqETnzy+0EA1NgdfLB+N39fvIOsksrj1o7sHMFT43owuFNYU5cp0iIppBARERERaQG2H8nnthnrWZ+ei7+HK29N6ssf+3XhvbW7efT7rZRV23C1mHlybHfuGxbL++t28/iCbZRW2RjSKYx3J/cn5n/6ThiGwZA3F/HTweZ5a4e3q41LrbmMisrHxWywL9+TGYnh7M7zdmpddwyy8vpVfTAMg5k70nn8+63szS05bt3QTmE8Na7HcVu5isjJKaQQEREREWnGSqtqeGbRDl5fvQu7w+Dqnh149cre5JdXMeLtxbUhQ5+2wfzndwOptjkY9vYiNh3KI9DTjX9P7c+NfTpjNv/aUHLm9oNc/d/meWuHi9nByE75XGbNxdvNTk6ZK7OTwtl42M9pTTGP1WXizwOjeeWK3qxMy+Lh+VvYeCjvuHWDOoTy1LgejOwSgcnkvHpFWiqFFCIiIiIizdS8pEPcPWcj6QVldAr24a2J/RjROZwXlyXx3A87qbY7cHcx87fxPbmlfxf+vmQHr69KwWEY/F9CR16+PIEwX8/a4+WVVRH25HQnntHJGPRpXcykuCxCvWsoqzbz9c5wlu0LwuakppgAFrOJ63p34vEx3SmqrObKD5ezMOXIcev6tw/hqXE9GPNzjwoROTMKKUREREREmpmMwjLumbuRuTuP9ZJ4ZNSxBpg7jxbS57XvScwsBI791v79qwewJ7eEnq/MJ72gjKjgY40xR0f/2hjTMAwGvL6g3t/8Nwedg8uYGp9FVFAFNoeJxXuDmZ8aQpkTm2IC9IgMZPr1Q3Exm3lq4XY+37IPw6i7pk/bYJ4a14PxXSMVToicAwopRERERESaCZvdwdtrUnly4a+9JN6Z1I/2gd48sWBb7VUSXm4WnrukFxPi23Hft5uYvSMdV4uZR0fH8+jobni6/vpj/tdbD/D7z1Y78axOLNyniklxWSREHuvpsCHDj9nJ4eSUuTm5Mth836W0DfDmuR928s6aVKp/3k70Fxe1CeKpcT24NKa1wgmRc0ghhYiIiIhIM7DpUB63zVzHlox8grzceH/qAG7oE8XyvZlc8Z/l7M8vBWB4VDj/mtKfxalH6PDsbAAGtA/lvan9iYsIqD1eTmklEU/NcMapnJKPm40ruuYwrGM+LmbYk+fJjMQI0vK9nF0a6+65mLiIAN5YvYsXlyVRXFlTZ75HZCBPjevBFXFtFE6INAKFFCIiIiIiTlRcWc0TC7bxzprdOAyDP/TuxEuXJ+BiNvGnGT/x0YY0AHzcXXjxsgT6tQvhui9+ZEP6r7duPDw6vjagMAyD3q9+x7YjBc44nZNyNTsY3TmPS6Jz8XJ1kFXqxsykcLYc8QUnNsUEWH3nOPq2C+GjjWlc9dEKjhZX1JmPjwjgqXE9mBDftk4TUhE5txRSiIiIiIg4gWEYzNqRzr1zN3KkuILoUD/emdyPEZ0jmL0jnbtmbyCz5NgH5THRrXhtQh8+2rCXO2atP+5Y46yRAHy+eR/XfbGmSc+jIUwY9G9bxFWx2QR71VBSZeHz7RGs3B+I3XBeU0yAZbePZWinMOYmHqL7S/NIzSmuMx8b7s+T43owqVs7hRMiTUAhhYiIiIhIEzuQX8qdszewYNdh3Cxmnh7XgwdHxlFQXs2UT1Yye0c6AP4errxyZW/CfDwY8uZCCiqq6xznyz8MYWrPDmQWV9D6mZnOOJVT6hpSytRuWbQPqKTGbuL73SF8vzuEihqLU+tadOtoRke3YvW+LIa8uah2K9dfWEP9eHJcd6b0aI/F7NwgReRCopBCRERERKSJ1Ngd/HPlLp5ZvJ2KGjsjO0fw9uR+dAnx5aMNaTwwbzOFPwcRl8a25qmxPZi2PImZ2w/WOc74rpHMu3kkJhPET/uWXVlFzjidk2rlW8mU+Cx6RBzrpfFTuj9zksPIq3BuU8x5fxzJJTGtScos5Mr/LGd+ckad+S4hvjwxtju/69XhpOHEoYIy3F3MdbZ4FZGzp5BCRERERKQJ/HQgh9tmrmPn0UJCfdz515T+/N9FHdmfX8q4935g6Z5MAIK83Hj1yj6UVtXQ95/fH3ecA49PpG2gNx9t2Msfv/6pqU/jlPzca7gyJoehHQowmyAlx4vpiREcLHTuh/nZNw7nirg2ZBSWc/NXa/l4Y1qd+ahgXx4f243f9+qIi+XE4cS6gzm8vDyZuYnpDOkYxvI7xjVy5SIXFoUUIiIiIiKNqKC8ike+28r76/YA8Mf+nXn+0ovw93Dl9VW7eGLhNsqr7QBM7N6OWwdEc983G0nKrHt1xCe/H8S1CZ04VFCG5f5Pm/w8TsXN4mBc51zGR+fh4eLgSIkbMxIj2JHpgzObYn593VAmdW9HYUU1j3y3lZeWJ9WZ7xDkzeNjunNtQidcTxBOOBwG3+3K4JUVyazelw1AQpsgnh7fs7HLF7ngKKQQEREREWkEhmHw5dYD3P/NJrJLK4mL8OedSf0Z3CmMxKMFXPr+T7U7dIT5ePDi5RexK7OIce/9UOc4IztHsPDWUQDNMpwwYTCofSFXxWQT4GmjqNLC9J2tWH0wEIfhvHDis/8bzO96daDSZueVFck8NH9Lnfk2/l48MbY71/eJOmE4UWWz88WW/byyIrn2lppRXSJ4cGQ8o7pEaAtSkUagkEJERERE5Bzbm1vMHbM28MPuo3i6Wnjukl7cOywGA3h64XZeWJZIjd0BwO8v6sj4rpH17sqx99EJtA/04dIPlrE49UgTn8WpGMSHlTIlPos2/lVU2Ux8mxLKoj3BVNqc1xTzlSsS8Pd0Y1SXCD7emMadszZQabPXzod4u/PM+J7c1DcKN5f66yyqqObfP+3h9dW7OFpcgckEk7q348GR8fRuG9xUpyJyQVJIISIiIiJyjlTZ7Ly8PIl//LCTKpuDcV0jeXtiXzoG+7LuYA63fP0TyT//Rr6VnydPjevB/KSM4wKK96cO4NqEjvx9yQ6e+yHRGadyUm39K5gSn0VcWBkOA1YfCGDurjAKK12dVtNjo7tRVFnNkwu3U1ZtO27e09XCtMsSuLl/Z9xPEE5kFJbxxuoU/v3THkqqanCzmPlj/87cPzyO6FC/xj4FEUEhhYiIiIjIObEyLYvbZ64jJbuYCF9PXpvQmyk92lNWbeMvczfy1o8pGMaxtdf17kRMuD9/nrGuzjEGdghl/h9H8v66PXg+9IUTzuLkAj1qmBCbzcB2hZhNsDPLh5mJ4WQUezitpknd2+FqMfPiskRsDqPeNf+c0Jtb+kfj4Vp/OJF4tIBXViTz5dYD1Ngd+Lq78sCIOO4Z2pVWfl6NWb6I/IZCChERERGRs5BbWsmD87fwycY0TCa4fZCVZy/uib+nG4tTj/DnGes4WFAGQNsAL+4eEsPjC7ZSZXPUOc6au8ezcNcRgh7/2hmncVIeLnYu7pLLmM55uLsYHCpyZ0ZiBEnZPk6rydvNhf7tQ5i1I/2Ea165IoFbB0bj6Xr8xx7DMFi1L5uXlyfx/a7DAIT7enDPkBhuHRhNgKdzt0oVuVAppBAREREROQOGYfDJxn08OG8zeeVV9IwM5N0p/enbLoT88ipu/HIN/920r3b9db07YTGbeGDe5jrHeWhkHGXVNga9sbCpT+GULCaDIR0KuDImGz93OwUVLny+PYy16QEYTtyxo0dkINuPFNRu2/pb0y67iD8PjMbb/fjbT+wOB3MTD/Hy8qTaxqWdgn3464g4ru8ddcKrLUSkaSikEBERERE5TSlZRdw+az0r07LwdnPh5SsSuGtwVyxmEzO2H+Tu2RvILq0EoGOQD1N7tufFZXW3vnR3MTMhvt1x482DQY+IEqbEZ9HKt5rKGjNzksNYvDeYanv9O2E0hTb+XmQUlbP9SEG9889d0os7BlvxqSecqKix8cnGfby2Mpm9uSUA9GodxAMj4pjUvR0uJ9jhQ0SaVoNDCqvV+j1wJDU19Y9Wq/Ue4H6gAvhLamrqgsYqUERERESkuaiosfH8D4lMW55Ejd3BFXFteP2qvrQL9OZIUTl3zFrPt0kZAJhMMLVHB9an5xwXREQF+5KWV8LX2w444SxOrkNABVO7ZWINKcfugOX7Avk2JYziKuf9ftPH3YXSKhsZReX1zj89rgf3DO2Kn8fxt2jklVXx7tpU3voxhZzSKuDYtq4PjIxjTHQrbSMq0sw06F8aq9U6DugJHLFarVHAHUAc0Bb4wWq1tk9NTa1ptCpFRERERJzsh91HuWPWevbmltDG34s3Jvblyvi2GIbB++v28NC8zRRVHvuRuHOILxe1CTphCJGWV9KElTdMsFc1E2Oz6d/22O4j2476MjMpnKMl7k6uDEqrjt+tA47dKvPQyHj86+kfcSC/lNdWJvPhhr2UV9sxmWBi93Y8OCKOPu1CGrtkETlDpwwprFarN/AMMA2IB64CpqemppYAyVar9QCQAKw74UFERERERFqorJIK7v9mE19uPYDZZOIvQ2N4elwPfD1c2ZtbzJ9nrGP53iwAzCYT47tG8v2uw7W3FDR3nq52Lo3OYXRUPq4WgwMFHkxPjCA119vZpZ3QHYOs/O3invU2t9ySkcfLy5OZueMgdoeBq8XMzf06c//wWKxh/k6oVkROR0OupHgdeBX4Ze+dtsD/btacAbQ6x3WJiIiIiDiVw2Hw/vo9PPrdVgorqunTNph3J/enV5sgbHYHryxP4smF26m02YFjzRerbI7anSKaO4vJwYhOBVzeNQcfNzt55a7MSgpjQ4a/U5tinsy1CZ14bUJvgrzqXt1hGAZLdh/l5eVJtc00fdxd+POAaO4ZGkOkv7YRFWkpThpSWK3W6wEjNTV1utVqveHnYTfgf/dLcgD2hrxYYmLiqRddIDZv3nzqRSLS6PReFHE+vQ+lOdpbWMnzG46yM7cCb1czD/SOYGLnQBxZ+/kyZRfPrj9CSv6xxpgWE3QJ8CAlr9TJVTeUQUJkMZPisgn3qaa8xsyMxHB+SAvC5miezSMHRfrwVP9IAjxc2L8rkf0/j9scBj+kF/Npci57Co/1mwjysHC1NYhJXYLwc4Oje3dx1Hmli5y2C/374qmupLgLCLBarSmAP+AJ+EGd93kb4FBDXiw+Ph53d+ff0+ZsmzdvJiEhwdlliFzw9F4UcT69D6W5Kauq4e9LdvLayv3YHAaTe7TntSt7E+nvRWWNnWeX7OCl5cfmACL9PDlSXEFKQaWTK2+YqKBypsZn0jm4ApsDftgbxLzUUEqrm+emf33aBjPvjyMJ9fGoM15aVcOH6/fy2qpdpBeUAceuZLlveCw39InC07V5no/IqVwI3xerqqpOegHDSd+9qampvX/5889XUgwG3gU+tVqtLwMdgCBg29mXKiIiIiLiPN8lZ3DX7A0cLCijQ5A3b03sx8UxrQH4cV82f5r+E6k5xQC4mE3YHAZHiiucWXKDhXlXMSkum96tj9W/6bAfs5LCyC5z7i8QI3w9ySw5/mvYPtCbtXdfTISfZ53xrJIK3voxhXfX7KagohqAHpGBPDgyjsnd22sbUZHzwGlHjKmpqZutVutnQBJQCfwxNTXVOOeViYiIiIg0gSNF5fxl7kZm7UjHxWzioZFxPD6mO15uLpRU1vDo91t5Z01q7Xp3FzNVNsdJjth8eLvZuNyaw4hOBbiYDdLyPZm+M4K9+c7t0XBRmyDyyqo4+PNVEL9wdzGT+vAE2gbWbdq5O6eYV1ck899NabVf++FR4Tw4Mp6xVm0jKnI+aXBIkZqa+jHw8c9/fg54rnFKEhERERFpfHaHg3fX7ObxBdsoqaphYIdQ3p3cj/hWgQB8v+swt89cx6HC8jrPawkBhYvZwaiofC6LzsHLzUF2qSuzksLZdMQPnNgUMybcn45BPvU2F113z8XHbQ267mAOLy9PZm5iOoYBJhNM6NaWB0fE0a99aFOVLSJNSDdriYiIiMgFZ0tGHrfNXM+mQ3kEeLrxryn9ublvZ8xmE7mlldz7zSa+2LL/1AdqZkwY9G1TxMTYbEK8ayirtvDljghW7A9sFk0xd2UVsSurqN65jzem0addCA6HwXe7MnhlRTKr92UD4Goxc21CR/46PI6u4dpGVOR8ppBCRERERC4YJZU1PLVoG2+uTsVhGPxfQkdevjyBMF9PDMPgyy37+cvcjeSWVTm71NNmDSljanwmHQIrqbGbWLgnmO9SQymvsTi7tFMaa43k9kFWPtqwl1dWJNcGGT7uLvypfzT3DO1KmwDvUxxFRM4HCilERERE5LxnGAZzEw/xlzkbySgqp0uIL29N6sfo6FYAHCoo447Z6/ku+fjbEJq7Vr5VTI7LomerEgDWHfJnTnIYueVuTq1rWFQ4K9OyTrpmdHQr7h0Ww84jhYx77weO/tyINNTHnbsGd+W2QVaCvLQ7oMiFRCGFiIiIiJzXDuaXcvecjcxPzsDNYuaJMd15eFQ8Hq4WHA6D99bt5pH5WympqnF2qafFz93GFV2zGdqhAIsZUnO9mL4zggOFnqd+ciPydnOhrNp20oBiVJcI/ti/C5sO5fG7/66u/dp3CPLm/mFx3NA3Ci83fVQRuRDpnS8iIiIi5yWb3cEbq1N4atE2yqvtDI8K5+1J/Wp7GuzOKeZP03+q7XvQUrhZHIyJyuOS6Fw8XB0cLXFjZlI424764symmL8oq7adcG5E53Am9WjPhoO5XPfFGmrsx5qQdm8VyAMj45jaQ9uIilzoFFKIiIiIyHln/cEcbpu5nu1HCgjxduftSf34Q0InTCYTNXYHr65I5tHvtzq7zNNiwmBgu0ImxGYT5GmjuMrCzG2tWHUgELvh/HDiVJ4e14MN6bncOWtD7djQTmE8ODKe8V0jtY2oiAAKKURERETkPFJYUc1j32/lvZ92YxhwY98oXrwsgWDvY30NtmTk0ee1751c5emLDS1lardM2vpXUW03MT81hAW7Q6i0Nf+mmAAWs4mnF22vfXxFXBseHBnPgA7aRlRE6lJIISIiIiItnmEYTN92kPu+2URmSQUx4f68M6kfQ6PCASitqqHbS/NILyhzcqWnp7VfJVPis+gWXorDgDUHA5izK4yCCldnl3Za7A4DF7OJ/0voxF+HxxIbEeDskkSkmVJIISIiIiIt2r68Eu6YtYHFqUfwcLHw7MU9uX94LG4uFipqbNz01Vqmbzvo7DJPS4BHDRNishnUvhCzCZKzvZmeGM6hIuc2xTxTfxkaw1+GxtA2UNuIisjJKaQQERERkRap2mbnlRXJPLtkJ5U2O2OiW/H2pH5EhfhSUF7FEwu28fKKZGeXeVo8XOyM65LHuM65uLsYHC52Z3piOIlZPjSHppinw8PFwiOj47ld24iKyGlQSCEiIiIiLc6P+7K5beY6krOKCPf14D9XDuDqnh04UlzBA99u5tWVLSucMJsMBrcvYEJMDv4eNgorXfhyRxhr0gNwtICmmPVJefhKXTkhIqdNIYWIiIiItBh5ZVU8PH8LH27Yi8kEfx4YzT8u6UVmcQW3TP+JjzakObvE02TQPbyUKfFZRPpVUWkz882uUBbtCabK3jKaYp5IiI+unhCR06eQQkRERESaPcMw+HTzPh74djO5ZVV0bxXIu1P6YTaZuPnrtczdecjZJZ62dv4VTO2WRUxoGQ4DVu4P5JtdoRRVtaymmL/12OhuPDO+h7YUFZEzopBCRERERJq11Owi7py1gWV7M/FyszDtsovoGu7P499vZfneLGeXd9qCPKuZGJvNgHZFAOzI9GFGYjhHSjycXNnZuXdYDC9dnqBwQkTOikIKEREREWmWKmvsvLgskReWJlJtdzC+ayTDoyL4Yst+th0pcHZ5p83Txc4l1lzGROXhajFIL/RgemI4u3J8nF3aWbl1QDRvT+qrcEJEzgmFFCIiIiLS7Czbc5TbZ65nT24JwV7uXNQmiN05xSxMOYLZZKJ7q0D25BZTUWN3dqmnZDEZDOuYzxVdc/B1t5Nf7sLs5HDWHfLHaGE7dvyvaxM68dHvBmI2t9xzEJHmRyGFiIiIiDQb2SUV/HXeZj7fvB+zycRNfTvzbdIhluw+CoCL2YSbi5kdR1vClRQGvVqVMDk+iwifaipqzMxKCmPJ3mBqHGZnF3fGJnZvx5fXDsHF0nLPQUSaL4UUIiIiIuJ0DofBhxv28vD8LRRUVJPQJoh3J/cnvlUAR0sqWL0vi9IqGzaHga26+V890TGwnKu7ZdEluBy7A5amBTEvJZSS6pb74/f4rpHMuXE4bi4te9cREWneWu6/kiIiIiJyXkjKLOS2GetYcyAHX3dXXp/Qh9sGRWMxH/tN/fTrhnLjV2uZuf2gkys9tRCvaibFZdG3TTEAW474MjMpnKzSlrsd59BOYSz402g8XBVOiEjjU0ghIiIiIk5RXm3j2SU7eGVFMjaHwcTu7fjnhD609veqXfPJxjRu+mqtE6tsGG9XG5d1zWVkp3xczAb78j2ZnhjOnjxvZ5d2xnq3DWbZbWPwdm/ZW6KKSMuikEJEREREmtzClMPcOWsD+/NLaR/ozZsT+3JpbJva+R1HCuj1ynwnVtgwLmYHIzvlc5k1B283BzllrsxOCmfjYb8W0RQz0s+TI8UVdcZiwv1Ze/d4/DzcnFSViFzIFFKIiIiISJM5WlzOvXM3MWP7QSxmEw+MiOOJMd1qf1ufXlBGx2dnO7nKhjDo27qYiXFZhHrXUFZt5uud4SzbF4StBTTF7NM2mI2H8uoEFO0Dvdl036UEebXcW1NEpOVTSCEiIiIijc7ucPDe2j08tmArxZU19G8fwruT+9M9MhBoSeEEdAkuY2p8Fp2CKrA5TCzeG8z8lBDKapr/j9aXx7VhXlIGGw/l1Y6F+rjz6dj2jBnUz4mViYgc0/z/JRURERGRFm3b4Xxum7mODel5BHi68c7kftzSrwtms4n0gjI6PzcHu8NwdpmnFO5TxeS4LC6KLAFgQ4Yfs5PDySlr/rdF3NK/C59sTGNeUkbtmJebhdSHJxDp78XmzZudWJ2IyK8UUoiIiIhIoyitquHpRdt5Y3UKdofBNb068MqVvQn39SS9oIwuz83B1gLCCR83G1d0zWFYx3xczLAnz4vpO8PZV+B16ic72eNjuvHh+r28v25PnfF9j11F+yAfJ1UlInJiCilERERE5Jz7JvEQ98zZwKHCcqKCfXlrUl/GWiNJLyjD/YHPWkQ44Wp2MKZzHpdE5+Lp6iCr1I2ZSeFsOeILzbwp5usT+vCvn3bz7JKddcZTH7mSziF+TqpKROTUFFKIiIiIyDlzqKCMu+ds4NukDFwtZh4b3Y1HRseTU1qF2wOftYjbOkwY9G9bxFWx2QR71VBSZeHz7RGs3B+I3WjeTTE/v3Ywb65O4Z65G+uM73zgcmIjApxTlIjIaVBIISIiIiJnzWZ38NaPKTy5cDtl1TaGdgrjncn98XK14PfIVziM5h9OAMSEljIlPov2AZXU2E18vzuE71NDqLBZnF3aCQV7ufPFH4YwbVki//fZj3XmNt93KT1bBzmpMhGR06eQQkRERETOysb0XG6buZ6th/MJ9nLn9av6MKJzBF2em9tiwolI30qmxGfRPaIUgJ/S/ZmTHEZeRfNtihkb7s/H1wzi70t2MO69H+rMrb17PP3ahzqpMhGRM6eQQkRERETOSFFFNY8v2Ma7a1MxDLi+TxR3DLLS//UFLSac8HOvYUJMDkM6FGA2wa4cb2YkhnOw0NPZpZ1QbLg/c24azpMLttP3n9/XmVt++1iGRoU7qTIRkbOnkEJERERETothGMzckc69czdytLgCa6gfD4+O5+avfuKTjWnOLq9B3CwOxnXOZXx0Hh4uDo4UuzMjMZwdWT4016aYPu4upD48gScWbMP6/Dd15hb+aRRjrJFOqkxE5NxRSCEiIiIiDbY/r4Q7Z29gYcoR3F3M3NS3Mx9u2MuNX651dmkNYsJgUPtCrorJJsDTRlGlC9N3hrP6YCAOo3mGEwAHHp/IyyuSaP3MzDrjc28azuVxbZ1UlYjIuaeQQkREREROqcbu4LWVyfxt8Q4qaux0CfFlT24JH27Y6+zSGsggPuxYU8w2/lVU2Ux8mxLKoj3BVDbjpphL/jyaJalH6fDs7DrjX103lCk92jupKhGRxqOQQkREREROau3+bG6buZ7EzMLasT25Jc4r6DS19a9gSnwWcWFlOAxYfSCAubvCKKx0dXZpJ/Tk2O7U2B2M+VfdhpgfXTOQ63pHOakqEZHGp5BCREREROqVX17FI99t4YN1LeVqiboCPWqYEJvNwHaFmE2wM8uHmYnhZBR7OLu0ExraKYzOIX78bfGOOuPvTO7Hn/p3wWRqvrekiIicCwopRERERKQOwzD4Yst+7v92EzmlVc4u57R5uNi5uEsuYzrn4e5icKjInRmJESRl+zi7tBMK8HSjXYA3q/Zls2pfdu34q1f25u4hXRVOiMgFQyGFiIiIiNTak1PMHbPWs3RPprNLOW0Wk8GQDgVcGZONn7udggoXPt8extr0AIxmumPHLworqimsqK59/OzFPXl4VLzCCRG54CikEBERERGqbHamLUvi6UXbnV3KGTDoEVHClPgsWvlWU1ljZk5yGIv3BlNtNzu7uOO4WszU2B31zj02uhtPj+uB2axwQkQuTAopRERERC5wK/Zmcsn7S6my1f/BuTnrEFDB1G6ZWEPKsTtg+b5Avk0Jo7iq+f6YW19Ace+wGF687CIs5uYXqoiINKXm+6+3iIiIiDSq3NJKpv53FSvTspxdymkL9qpmYmw2/dsWAbDtqC8zk8I5WuLu5MpOz60Donnjqj64WBROiIiAQgoRERGRC45hGDy1cDv/+GGns0s5bZ6udi6NzmF0VD6uFoMDBR5MT4wgNdfb2aWdlj/07sS/p/THzcXi7FJERJoVhRQiIiIiF5C1+7MZ8tYiZ5dx2iwmByM6FXB51xx83OzklbsyKymMDRn+zb4p5m8VP/c7vN1dnV2GiEizpJBCRERE5AJwpKictn+b5ewyzoBBQmQxk+KyCfepprzGzIzEcH5IC8LmaFm3SOx84HJiIwKcXYaISLOmkEJERETkPJZVUkHk0zOdXcYZiQoqZ2p8Jp2DK7A54Ie9QcxLDaW0umX9CLvl/kvpERnk7DJERFqElvUvvIiIiIg0yIH8UqL+MeeE8x4uFipt9iasqOHCvKuYFJdN79bFAGw67MespDCyy1pWU8x191xMn3Yhzi5DRKRFUUghIiIich5Jziyk20vz6p0zmaBv2xB2ZhZQXt38AgpvNxuXW3MY0akAF7NBWr4n03dGsDffy9mlnZaVd4xjcKcwZ5chItIiKaQQEREROQ+sP5jDwDcW1jvnajEzsVs7sksrWL63+W036mJ2MCoqn8uic/Byc5Bd6sqspHA2HfGDFtQUc9Gtoxkd3crZZYiItGgKKURERERasCWpRxj/76UnnH9gRBzVdjuvr0ppwqoaxoRB3zZFTIzNJsS7hrJqC1/uiGDF/sAW1RRzzo3DuSK+rbPLEBE5LyikEBEREWlhDMNgxvaDXPPp6hOu+eeE3rhaLNwxa30TVtZw1pAypsZn0iGwkhq7iYV7gvkuNZTyGouzS2uwdyf3408Dop1dhojIeUUhhYiIiEgLUWN38NGGvdw288TBw4e/G0iojweXf7CsCStruFa+VUyOy6JnqxIA1h3yZ05yGLnlbk6urOH+c/VAbugb5ewyRETOSwopRERERJq58mob76xJ5aH5W0645q2JfenTLoTx7/1AQUV1E1bXMH7uNq7oms3QDgVYzJCa68X0nREcKPR0dmkN9sZVfbhjcFdnlyEicl5TSCEiIiLSTOWXV/HKimReWJp4wjX3DovhzwOjuf6LNdw5e0MTVtcwbhYHY6LyuCQ6Fw9XB0dL3JiZFM62o760lKaYz13Si4dGxTu7DBGRC4JCChEREZFmJqOwjOeXJvKvtbtPuGZUlwhem9CHF5YmYn3+myasrmFMGAxsV8iE2GyCPG0UV1mYua0Vqw4EYjdaRjjxyKh4/n5xT0ymllGviMj5QCGFiIiISDORklXE35fs4KutB064ppWfJ+9O7se6g7l0f2le0xV3GmJDS5naLZO2/lVU203MTw1hwe4QKm0toynm7YOsvHFVH4UTIiJOoJBCRERExMk2pOfyt8U7WLDr8AnXmE0mHh4VR6CnOxM+XNF0xZ2G1n6VTInPolt4KQ4D1hwMYM6uMAoqXJ1dWoP8X0JHPrlmkMIJEREnUkghIiIi4gSGYbBk91H+vngHaw/knHTtiM7hjOzSiicWbGua4k5TgEcNE2KyGdS+ELMJkrO9mZ4YzqGiltEU89LY1sy9cQRms8IJERFnU0ghIiIi0oTsDgezdqTz98U7SM4qOm4+wNONwp935wjxduey2DZ8vDGN5XuzmrrUU/JwsTOuSx7jOufi7mJwuNid6YnhJGb50BKaYg7qEMqKO8YpnBARaUYUUoiIiIg0gcoaO//dlMZzP+zkUGH5cfOXx7XB7jBYkHLslo++7YJJziri441pTV3qKZlNBoPbFzAhJgd/DxuFlS58uSOMNekBOFpAU8zYcH+2/fUyLGazs0sREZHfUEghIiIi0oiKKqp576fdTFuWRMHPV0j8r/uHx9Ip2Je/Ld5OVkklPu4u1NgdbEjPc0K1p2LQPbyUKfFZRPpVUWkz882uUBbtCabK3vybYvp5uJL9t6m4WhROiIg0VwopRERERBpBZnEFb6zexeurUqi02Y+bf/Gyi7g0tg33zt3IKyuSa8dLq2xNWWaDtfOvYGq3LGJCy3AYsHJ/IN/sCqWoqmU0xSx/8fe4uzT/IEVE5EKnkEJERETkHErLLeGVFcn8e91uDOP4+Q9/N5Df9erAKyuS6f3qd/UGGM1JkGc1E2OzGdDuWP+MHZk+zEgM50iJh5Mra5iS56/By00/8oqItBT6F1tERETkHNh2OJ9py5L4etuBeufn/XEkl8S0ZlVaFgmvfseueppmNieeLnYuseYyJioPV4tBeqEH0xPD2ZXj4+zSGiTtsavoENQyahURkV8ppBARERE5Q4ZhsDItixeXJbE49Ui9a9bcPZ7+7UPJK6vi5q/WnrQRZvtAbw4WlDVWuQ1iMRkM65jPFV1z8HW3k1/uwuzkcNYd8sdoATt2zL5xOFfGt3V2GSIicoYUUoiIiIicJofD4NukQ0xblsT69Nx61yQ+eAUx4f4YhsEnG9N4cN5mcsuq6l3bq3UQWw/nOzmgMOjVqoTJ8VlE+FRTUWNmVlIYS/YGU+No/o0m7xnalecvvUh9J0REWjiFFCIiIiINVG2z88WWA7y0PJGU7OLj5n3cXdj+18trbzNIySrijlnrWZGWVe/xYsL92ZVVxNbD+Y1a96l0DCzn6m5ZdAkux+6ApWlBzEsJpaS6+f+o2L1VINOvH0qXUD9nlyIiIudA8//OIyIiIuJkpVU1/Gf9Xl5dkUxGUflx852CfVh5xzgi/b0AqKyx8/zSnTy7ZGe9xwvwdKOwotrpfSlCvKqZFJdF3zbHApctR3yZmRROVqm7U+tqqE//bzDX9OqAydT8b0MREZGGUUghIiIicgK5pZW89WMqb/2YQkFF9XHz/duHMPOGYbTy86od+2H3UaZ+spKiypoTHrewnmM1JW9XG5d1zWVkp3xczAb78j2ZnhjOnjxvp9bVULcOiOYfl/Qk0KtlhCkiItJwCilEREREfuNgfimvrdrFB+v2UFFz/BahF8e05v2p/euEE9klFdw6Yx3fJmU0ZamnxcXsYGSnfC6z5uDt5iCnzJXZSeFsPOzXIppidm8VyLtT+tG/faizSxERkUaikEJERETkZ4lHC3hpeTJfbd2PzWEcN/+7Xh146fKE2ts64FgTzXfXpnL3nI1NWeppMujbupiJcVmEetdQVm3m653hLNsXhK0FNMUEeOnyBO4e0hUXS8uoV0REzoxCChEREbngrd2fzYvLkpifXP9VEDf17cwz43vUCScAth3OJ+HV75qixDPWJbiMqfFZdAqqwOYwsXhvMPNTQiiraRk/Bl4e14Y3rupLu8CWcSuKiIicnZbx3UlERETkHDMMgwUpR5i2LJHV+7LrXXPbwGgeGd2N1r8JJ0oqawh47KumKPOMhftUMTkui4siSwDYkOHH7ORwcsrcnFxZw7Tx9+KNiX25Mr6ts0sREZEmpJBCRERELig2u4Pp2w8ybVkiO48W1rvm9kFWHh4Vf1w44XAYDH5zIevTc5ug0jPj42bjiq45DOuYj4sZ9uR5MX1nOPsKvE795Gbi3mExPD2uBz7urs4uRUREmphCChEREbkglFfb+HhDGq+sTOJAflm9a24fZOWhkXG0CTj+1oItGXn0ee37xi7zjLmaHYzpnMcl0bl4ujrIKnVjZlI4W474QgtoignQr10I70zuR8/WQc4uRUREnEQhhYiIiJzXCsqreHftbt5YvYuc0qp619w2MJqHR8XXG04UVlQT/PjXjV3mGTNh0L9tEVfFZhPsVUNJlYXPt0ewcn8gdqNlNJn083DluUt78af+XbCYW0bNIiLSOBRSiIiIyHnpSFE5/1y1i/d+2k1pla3eNX8eGM3DI+NpW09Txmqbnan/XcW8ZrylaExoKVPis2gfUEmN3cT3u0P4PjWECpvF2aU12NU9O/Dqlb2J8PN0dikiItIMKKQQERGR80pqdhEvL0/ms837qLY7jps3meDWAdE8NDK+3h0jHA6D11fv4q/fbm6Kcs9IpG8lU+Kz6B5RCsBP6f7MSQ4jr6JlNMUEiAr25a1JfRlrjXR2KSIi0owopBAREZHzwsb0XKYtT2LOznQM4/h5V4uZm/p25uFR9YcTAPOTM7jyP8sbudIz5+9ew5UxOQzpUIDZBLtyvJmRGM7BwpZzFYKL2cRDI+N5ZHQ8nq76UVREROrSdwYRERFpsQzDYOmeTKYtS2Tpnsx617hazNzYN4qHR8bTPsin3jUb03Pp//qCxiz1rLhZHIzvksu4Lnl4uDg4UuzOjMRwdmT50FKaYgIMiwrnnUn96BruT3l1/bfgiIjIhU0hhYiIiLQ4doeDOTsPMW1ZIpsz8utd42I2cWPfzjwy6sThRFpuCdHPz23ESs+OCYPB7QuZEJNNgKeNokoXpu8MZ/XBQBxG8w0nTCbqXM0S4u3OtMsTGNk5gq+2HuCaT1ez42gB8/44kktiWjuvUBERaXYUUoiIiEiLUWWz899N+3hleRJ7ckvqXfNLOPHwqHg6nCCcyCmtZPCbC9l7gmM4n0F8eClT4rJo419Flc3EtymhLNoTTGULaIr5vwHFxO7t6NM2mE82pnHz12tr54Z0CqNv22DnFCgiIs2WQgoRERFp9oorq/n3T3v456pdHC2uqHeNi9nEDX2jeGRUtxOGE2VVNUz6eCVLdh9tzHLPSlv/CqbEZxEXVobDgNUHApi7K4zCSldnl3baQn3cmZ+Uwewd6bVj/duH8Mz4nozqEoHJ1HyvBhEREedQSCEiIiLNVlZJBW+uTuGdNakUVdbUu8bFbOL6PlE8MiqejsG+9a6psTu4a/YG3l+3pzHLPSuBHjVcFZvNgHaFmE2wM8uHmYnhZBR7OLu0M5ZTWlX754Q2QTw9vicXd41UOCEiIiekkEJERESanX15Jby6IpmPNqRRabMDx/ocmDDh+Pl+AYvZxPW9o3h09InDCcMweGFpIo8v2NZUpZ82Dxc7F0fnMrZzHm4Wg0NF7sxIjCApu/6rQVqa7q0CeWpcd66Mb6twQkRETkkhhYiIiDQb24/kM21ZEtO3HawNIzxdLQR4ulFcWUNZta02nHhkdDydThBOAHy6aR83fLmmqUo/bRaTwdAOBVwRk42fu52CChc+Sw5jbXoARjPdseM/Vw/k5q/XNmhtTLg/T43rwaRu7TCbm+f5iIhI86OQQkRERJzKMAxW78vmxWWJLEw5Ujse5uNBpJ8n2aWVHCmuwGI2cWPfKB4d3e2k4cTS3UcZ+94PTVH6GTLo2aqEyXFZtPKtprLGzJzkMBbvDababnZ2cfW6d1gMa/ZnNyig6BLiyxNju/O7Xh2wmJvn+YiISPOlkEJEREScwuEwWJVRwj1rFvHTwZzacWuoHx2CfUjLLWHbkQIsZhM39DkWTkSFnDic2Hm0gJ4vz2+K0s9Yh4AKpnbLxBpSjt0By/cF8m1KGMVVzftHstdW7jrlmo5BPjw+pjvXJnTExaJwQkREzkzz/o4oIiIi550au4Mvtuzn5eVJJGcV1Y4P7RRG13B/1uzPZlHKkWO3dfSJ4rFThBMZhWW0//vspij9jAV7VTMxNpv+bY+d77ajvsxMCudoibuTKzs33p3cjxv6ROHm0vy3RxURkeZNIYWIiIg0ibKqGv6zfi+vrkzmUGE5AGYTXNWtHX8dEcfmjDzunLWhNpx4dHQ8nUP8Tni8oopqer4yn/SCsqY6hdPm5WrnUmsOozrl42oxOFDgwfTECFJzvZ1d2jkRHxHAF38YQlxEgLNLERGR84RCChEREWlUeWVVvP1jCm/+mEJ+eTVwrBnmjX07MzrIzpXDB/D2jyncPWcjYT4eLLx1FD0ig054vGqbnYv/vZQVaVlNdQqnzWJyMKJTAZd3zcHHzU5euSuzksLYkOHfbJtiNlSYjwcPjYzj1oHReLrqR0kRETm39J1FREREGsWhgjJeXZnMB+v3UF59bBvRUB937hjUldsGRhPi48HmzZt5Y9Uu7v1mExG+nvxw2xhiwv3rPZ5hGPzx65/4eGNaU57GaTLoHVnMxLhswn2qKa82Mz0xnKVpQdgcLaNPg5ebhcoaR+3uKr8I8nLjgRFx3DHIire7q5OqExGR851CChERETmnkjMLeWl5El9s2Y/NceyDbpcQX+4dHst1vTvV+e3757vyeH1rMq38PFl62xisYfUHFP9YsoMnF25vkvrPVFRQOVPjM+kcXIHNAT/sDWJeaiil1S3rx63fBhT+Hq7cNzyWu4d0xc/DzYmViYjIhaBlfdcUERGRZmvdwRxeXJrIt0kZtWMD2ody/4hYrohrc9x2lC8vT+L1rVlE+nmy9PaxRIce33/ik41p3PTVqbe9dKb4sBLuHZRe+3jTYT9mJYWRXdZ8m2IGe7mTV14FQKSfJ95uLuzJLQGoDSi83Vz4y9AY7h0WQ6BX8z0XERE5vyikEBERkTNmGAYLU47w0vIkVv7cI8Jkgstj2/DXEXEM6hhW7/NeWLqTx77fRpiXC8vvGHtcg8zFqUe4+N9LG73+sxHuU8VzY/bWGXtuZUfS8r2cVNGp3Togmtk7D5JTWkWwlzu3DYrmQH4Zn23eV2fdgyPiuH94LCE+Hk6qVERELlQKKUREROS02ewOZmw/yEvLk9h+pAAAdxcz1/WO4t5hMSe8bQN+vXWjXaA3rw9pVSeg2JqRT+/Xvmv0+s+Gp6ud58fswdfdXju2IcOPf29s02ybYr4+oQ8vLU/ivZ924+vuypNju9PKz5PbZq6vs25i93a8NbEv4b6eTqpUREQudAopREREpMEqamx8vDGNV5Ynsz+/FDjWUPG2gVbuGGw95Yfbvy3azjOLd9A+0Jtlt48lb38qAPvzSuj83NzGLv+smDC4e0A63SNKa8dyylx5amkUVXaLEys7sWcv7sknG9O4Z+5GPFws3D88lknd2zHwjYXHrV15xzgGd6r/yhcREZGmopBCRERETqmwopp/rU3l9VUpZJdWAtAhyJt7h8ZyY9+oU+72YBgGTy/azrNLdtIxyIelt42hfZAPe3fZaPPMTI4WVzTFaZyxK7pmc2VMTp2xhxZ1Ibe8eTaSvLlfZzam5/H4gm24mE3cOiCaB0bE0uPl+byyIrnO2rk3DefyuLZOqlRERKQuhRQiIiJyQkeKynl91S7e+2kPJVU1APRuG8z9w2OZ2K0dLpZTb6tpGAZPLNjG80sTiQr25YfbxhDo6cbQNxey5kDOKZ/vTL1aFXNn/0N1xqat7kBqrreTKjq5hDZBuJjN/Gf9XkwmuDahE0+O7c6TC7cdd6XKB1cP4Ma+nZ1TqIiIyAkopBAREZHj7Mkp5uUVSfx34z6q7Q4ALo5pzV+HxzIsKhyTqWG9FwzD4NHvtjJteRJdQnz57pZRPPb9Vr7Ysr8xyz9rrf0q+duotDpjn21rxfL9QU6q6NT6tQthfXouABO6teWZcT1YmZZF9PNz66x7eFQ8z17cs8F/hyIiIk1JIYWIiIjU2nwoj2nLk5i14yCGAa4WMzf0ieK+4bHERQSc1rEMw+Ch+Vt4ZUUyUcG+9O8QetwH5ubGx83Gy+N342oxasdWHQjgk62R0EybYlpD/UjNKWZ9ei6jo1vx7MU9OVpcQY+X59dZN7hjGEtvG9Ogq19EREScRSGFiIjIBc4wDJbtyWTa8iR+2H0UAH8PV24dEM1dQ7oS6X/6W2oahsH9327i9VUpAKTllZCWV3JO6z6XLCaD+wcfwBpSXjt2qMidf6zoRI2jeX6odzGbsBsGqTnFDGgfyrOX9MQA+r++4Li1Rc/9Dp9T9A0RERFpDhRSiIiIXKDsDgdzEw8xbVkSmw7lAdA2wIt7hsZwc7/O+HmcWVNIwzD4y9yNvPVj6rkst9FMic9kfJe8OmP3L4imsLJ5f6i3OQx6RAby94t7EuTlzuA3j9+xY9tfL6Nbq0AnVCciInJmFFKIiIhcYKpsdj7bvI+XlyezO6cYgB6Rgdw3PJare3bA9SxuBzAMg+4vzSM5q+hcldto+rUp5E99DtcZ+8eKjuwrOP0rR5palxBfnhnfk6gQX4a8ubC2b8gv3p7Ujz8PjHZSdSIiImdOIYWIiMgFoqSyhvfX7eG1lckc+XnLz9HRrfjr8FhGR7c660aKmw7l0e+f35+LUhtVh4AKnhixr87Yh5sjWZPe/K84aBvgxRNju9OrdRBXfbiCjKLyOvNXxLXh0/8brFs7RESkxVJIISIicp7LLqngzR9TeGfNbgorqrGYTfz+oo7cPzyWnq3PfreK1OwiBr2xkIKK6nNQbePxd6/h1Ut21xlbsjeIr3ZG0FybYv4i1Medx0Z3Y3DHcG7+ei3bjxTUmXe1mFl3z8Xn5O9TRETEmRRSiIiInKf255Xw6spdfLh+L5U2Oz7uLtw7LIa7h8TQLtD7rI+fXlDG5I9XsDkj/xxU23hczA4eHbaf9gGVtWN78zyZtroDdqN5NsX8hb+HKw+MiGN819Y8MG8Tf5m76bg1b03qy5/6d8Fibt7nIiIi0hAKKURERM4zJZU13DF7PV9tPYDdYdDKz5O7h3TlTwOiCfA8s2aY/yu7pII/z1zPN4mHzkG1jcng2h5HGdHp16sO7A64f4GVkurm/SOQl5uFu4fEMKl7O/7xw04eX7DtuDVTe7bntSv7EOHn2fQFioiINJLm/R1aRERETtumjDw+37yf2HB/7hsey+8v6oi7i+Wsj1tUUc0j323lvZ92n3qxkw1pX8ANFx2pM/bMsk6kFzX/D/ShPu5cEdeWF5Ym8sLSxOPmOwR58+7k/oy1RjqhOhERkcalkEJEROQ8M6JzBPsfn0gbf6//b+++w6Oq0zaOf2fSe68QQurQW6jSRDqoCNbVXeu6uurae69YsJe1oa66a++I9A7SW2iZJIQWAgESSK8z8/6Bb3AESQIkZwL357r2WvKcM2fuEQ4z83DO88NsPvlZC+XVtUyat4knZ6afgnRNKzmsjAcGbXeqvb2iNat2BxkT6ATsL63ig+XZx9z20LDOPDCsEz4e+ggnIiKnJ73DiYiInIZOxcyJ6lob7y3N4rYfVp6CRE0r1KeaSaOynGo/W8P5fnOUQYkap0NU0DGXbT2rbQQTx3YnPsSfcD8vfD310U1ERE5veqcTERERJza7nc/WbOfqz5cYHaVenm52HjtnK9H+R1YW2ZTvx6tL47E7XHvFjtHtW3H7oPbMydzDC/M2OW27tncyT47uSkygr0HpREREjKEmhYiIiADgcDj4aVMuEz6ab3SUBnDw97Td9Gtz5OqD8moz989MoazGtT/eDEyM5O4hHVm58wAj353ttG1cpzieP7cHKRGBBqUTERExlmu/i4uIiMhJW7g1n2lbdtO9dShDkqOJ8Pc+ap+5WXu44MP5lFXXGpCwcYYlFfCXLnudag/PTmJPydGvy5V0iQnhoeGdse4rYtwH85y2DUiI5OVxPUmLCzMonYiIiGtQk0JEROQ0VVBWxb1TVvOflVud6l1iQhiSEsWQ5Gh8PNz513cryNxfbFDKhmsfUcrdA3Y41V5b2ob0vQEGJWqYcD8vXjy/J3uKy7n0k4VO2zpEBfHqBb0YmhpjUDoRERHXoiaFiIjIacbhcPDp6hzu+Wk1B8qq6BYbwkPDu5C5v4i5WXtZsm0/6XsO8trCDKOjNkikXxXPjnBe7eLbTZH8khlhUKKG+/dFfSitrOEfXy2l2mavq8cE+vDqBb24sEsbTCbXnp0hIiLSnNSkEBEROY1k7S/mpm+WMzd7L76ebkw6L41bB7bD3c0MwCXd2nL7DyuZunm3wUnr5+1u45lh2QT7HLkFZXVeAG8vj8OBa3+xf+n8NAAemrqWgxVHhnr6errx8rheXNMrqe73RERERI5Qk0JEROQ0UFVrY9K8TUycvYGqWjtj2rfizQm9iQ/1B2BPcTlPzEjn/WVZ9RzJeCYc3NxnF91jS+pqhRXuPDI7mcpaNwOT1e/BYZ0I9/PmxXmbyCuucNr23Nge3DzAomVERUREjkPvkiIiIi3copx8/vnNcrbkFxET6MNr43sxofPh2wgKy6t4Ye4mJv1hiUtXNTZ1PxM67nOq3T8zhf1lngYlapgr0hLo2TqM1xdlsK2w1GnbvUM6cu85HQnx9TIonYiISMtRb5PCYrGYgRlAPOAAbrVarTMsFsttwF1ABXC71Wqd1qRJRURExElheRX3TVnDhyuyMZngn2el8syY7gT5eFJaVcNrC7fw6PT1RsdskK7RJdzab6dT7cXF8WzZ729Qoobp0TqUv6Ul8vavmfxv9Tanbdf3TeGREV1oFeRrUDoREZGWpyFXUjiAK61W6x6LxTIKeMZisWQDNwMdgThgtsViibdarTVNmFVEREQ4PBjzszXbuOunVewvraJLTAhvX9yHvvERVNbYeH3hFu74cZXRMRskJqCSp4c5rz7y2fpo5uS4/lKck85L46MV2Uf9t76oazxPje5GakSgQclERERarnqbFFar1QHs+e3HeGA9MB74ymq1lgCbLRbLdiANWNZEOUVERATIPnB4MOacrL34eLjx/Lk9uG1Qe0zAh8uzuenb5dT8bhUJV+XnUcvzI7Pw8TiS9dedQXywuhW4+FDMh4Z15ufNudwzZbVTfWhKNBPH9qBnnOs3WERERFyVyeFw1LuTxWK5F7gP2A+MBO4ENlqt1vd/2/4V8LnVav3+WI9fvXp1W2DbsbaJiIhI/WpsDv6bcYAPNx6gyuagX4wf9/aKIcbPgzk7i3l5dT4FlbX1H8hgZpODO87aQYfIsrranhJPnpyXRLXNtVe7OC8xmOxDlWwprHSqtwv15pZukfSOdu1bU0RERFxMQlpa2vY/Fhs0ONNqtb4AvGCxWCZweD7FPOD3/0xjB2z1HadTp054eWlo1OrVq0lLSzM6hsgZT+eitBSLc/bxz2+WsTm/iOgAH165oCcXd41nekYe105Zzeb8IqMjNsiEDvmMtRxwqt0zPYXCCtceitk3PhwTJqbk7Heqp4QH8NSY7lzYuQ1ms2tf/SFSH70niriGM+FcrKqqYuPGjX+6vVGre1it1u8sFsvrHL79o9XvNrUGdp1QQhERETmmg+VVPDB1Le8vy8Jkght/G4y5cc8hBr85gyXb99d/EBfQq1URN/bOdao9u7At2QV+BiVqGD9PdzrHBLNsh3NjJSbQh0dGdOHa3sl4uLn21R8iIiItTUNW90gEyq1W616LxdIPqASmAp9aLJYXgbZAKLCuCXOKiIicMRwOB1+s3c6dP65iX2klnaKDeefivni7u3HFfxcxPSPP6IgN0iaogsfOyXGq/WdNLIt2hBiUqOE6RQezce8hpwZFkLcH953TiX8NbIevp1ZxFxERaQoNeYcNBqZbLBY3IB+41Gq1rrZYLP8FNnG4afH33wZsioiIyEnIKSjh5m9XMNOah7e7GxPHdOfcjq15amY6X6/fYXS8Bgn0quWl0VZ+fwfE3JwQ/rc+Blcfihnu58WBsio27j1UV/N2d+NfA9tx7zkdCfXVbasiIiJNqSGre6wBUo9RnwhMbIpQIiIiZ5oam52X52/myZnpVNbaGJ4awwPDOvPfVTl0mTTF6HgN4mayc9+g7SSFVtTVth/05tmFCdTaW8ZtEQfKqup+7WY2cU3vJB4Z3oXWwa59a4qIiMjpQtcqioiIGGzp9v3c+PUyNu49RKS/N88N605OQSnn/Hum0dEayMFfuuxlWFKhU/XOX1IpqvIwKNPJmdClDU+N6ka7qCCjo4iIiJxR1KQQERExyKGKah6cupb3lmXicMAl3eKJ8PPm9h9WGR2twfq3Oci1ac4zMp6cl8iOQz4GJTo5Q5KjmDi2B73bhBsdRURE5IykJoWIiEgzczgcfL1+B3f8sIq9JRUkhPrTOSaYaVvyKKmqMTpegySFlvPg4G1OtfdWtmJ5brAxgU5S91ahTBzbneGpMZhMrj03Q0RE5HSmJoWIiEgz2lZQwi3frWB6Rh5uZhNxwb4UV9bw06bc+h/sAkK8a3hxdKZTbVpmGN9sijYo0clJDg/gyVHduLhrPGazmhMiIiJGU5NCRESkGdTY7Ly6YAtPzFxPRY0NAJvdwa5D5QYnaxgPs51HhuTQKvDIYMmM/b68vKQtNkfL+3IfHeDDIyO6cF2fZDzcWsZQTxERkTOBmhQiIiJNbNmO/fzz6+Wk7zlodJQT4OCaHnkMiD9UV6mqNXHvjFRKq1vex4hAbw/uHdKRWwe2w8+rZQ71FBEROZ21vE8XIiIiLURRRTUP/bKWd5YeHozZ0gxJKOCv3fY61R6dk8TuYm+DEp04L3cztwxox33ndCLMz8voOCIiIvIn1KQQERE5xRwOB9+m7+T2H1ayp7jC6DiNZgkv496B251qby6LY+2eQGMCnQSzycTVvZJ4dEQX4kL8jI4jIiIi9VCTQkRE5BTaUVjKLd+t4Jctu42O0mjhvtU8PzLLqfbD5gimWCMNSnRyLugcx9Oju9M+KsjoKCIiItJAalKIiIicArU2O68vyuCeKauNjtJoXm42nhy6lXC/I8ufrtvjz5vL2uCg5Q3FPDspiolju9MnPsLoKCIiItJIalKIiIicpBU7D3DBh/PIL6k0OkqjmHBwQ69cerUurqsVVbrx0OwUKmrcDEx2YrrFhvDM2O6MtMRiMrW85oqIiIioSSEiInLCiiurufnbFXy2ZpvRURptZMoBLumU71R7cFYy+aUtb6hkYpg/T47qxqXd2mI2qzkhIiLSkqlJISIi0kgOh4NPV+dwzee/Nmj/xDB/cgpKmzhVw3SKKuGOs3Y61V5Z0oaN+wIMStR4ZpMJu8NBVIA3jwzvwnV9kvF0b3lXfoiIiMjR1KQQERFphOwDxVie/bFB+45qF8v0jDyXaFBE+1fxzPBsp9qXG6KYmR1uUKLG8/Fwo6LGhr+XO/cM6citA9vh7+VhdCwRERE5hdSkEBERaYCqWht9Xv2FDXsO1bvvtb2T+XBFNtMz8po+WD18PGw8OzyLAC9bXW35rkDeX9W6xQzFDPL2oKiyBrvDwR2D23P/OZ0I9/c2OpaIiIg0ATUpREREjsNud/DQL2t5Yd6meve9ub+Ft5ZY+XBFdr37NjUTDm7tt5Mu0Ueu4thX6sHjc5OosrWMWyP8PN0pq66lpKqWq3sl8djIrrQJ8TM6loiIiDQhNSlERESOweFw8E36Ti77ZGG9+97QL5V3l2by1hJrMySr37h2+zi//X6n2r0zUigo9zQo0Ykpq65lXKc4nhrdjY7RwUbHERERkWagJoWIiMgfLM7Zx+C3ZtS73yXd4tleWMq7SzObIVX9esQWc3OfXU615xe2JbOg5Vx9YDKBwwGDEiOZOLYH/dpGGB1JREREmpGaFCIiIr9Zt7uQaz7/lfQ9B4+73+CkKJLDA/hgufG3dQC0DqzkiaFbnWqfrI1hwfZQgxKduC4xITwzpjuj2sViMrWMmRkiIiJy6qhJISIiZ7zM/cU8/Mtavk3fedz92kcFMaFzG56ZvYEFW/ObKd2f8/es5cVRmXi4OepqC7cH8/HaWGghQzH/X0KoP0+O7sZl3dpiNres7CIiInLqqEkhIiJnrF0Hy3hqVnq9V0REB/hw41mpPD5jPc/kb2imdH/OzeTg7gHbSQ0vr6vtKvLimfmJ1NjNBiZrvFBvNx4f3YPr+6bg6d4yBnqKiIhI01GTQkREzjj7Syt5bs5GXl245bj7+Xm6c3N/Cy/M28TjM9Y3U7rju6TTXkamFDjV7pqWyqFKD4MSnZgALw/uHtKBwQFVDOzbzug4IiIi4iLUpBARkTNGUUU1Ly/YzKsLt1BaVfun+5lNJq7rk8ya3IIGLT3aHPrGHeL6nrudak/PT2DbQV+DEp0YTzczN/W3cP/QTkT4e7N69WqjI4mIiIgLUZNCREROexU1tby12MrzczdSWF593H0ndGmDj4cb7y/LaqZ0x5cQUs7DZ29zqk1e1Yqlu4KNCXSCTCb4W1oij4/sSnyov9FxRERExEWpSSEiIqetGpudD5Zn88ysdPKKK46778DESHrGhfHKguPfAtJcgr1reGm089KmM7ND+XJDNC1tKOZ5HVvz9OhudIoJMTqKiIiIuDg1KURE5LRjs9v5Yu12Hp+xnpyC0uPu2y4ykPM6xjFp3iYW5exrpoR/zt1s56HB22gTXFlXyyrwYdKittgcLWso5oCESCaO7U7/hEijo4iIiEgLoSaFiIicNhwOB1M25fLItHVs3HvouPtGB/hwSbd4Xl+UQcY+V5g74eBv3fZwdsLBukqtHe6eZqGkumW9XXeOCeaZMd0Z074VJlPLuupDREREjNWyPvWIiIj8iblZe3j4l3Us33nguPv5ebrzlx5tmbwsm9cXZTRTuuMb1LaQq7rvcao9PjeRXUU+BiU6MW1D/XhiVDf+0r0tbuaWddWHiIiIuAY1KUREpEVbsfMAD01dy9zsvcfdz81s4sIubfhm/U4mL8tupnTHlxJWxv2DtjvV3l7emlV5QcYEaoQQH0+KKmuwOxxE+Hvx8LAuXN8vBS93N6OjiYiISAumJoWIiLRIm/Ye4sGpa/l5c269+45sF8va3EK+WrejGZLVL8ynmhdGOa8e8nNGON9viTIoUcP1i49g+8FS9hRX4O/lzl2DO3DH4A4EeHsYHU1EREROA2pSiIhIi7KtoIQHpq7l6/X1Nxx6xYWxv6ySGRl5zZCsfp5udh4/ZytR/keWQd2Y78drS+OxO1x7dsNVvZJYk1vA0h378XAzc+vAdjw4rDMR/t5GRxMREZHTiJoUIiLSIuwpLuehX9bx8cqt9e6bHB6AwwErdxU0Q7KGcHB9z930jSuqq5RVm3lgZgplNa79VjxxTHemZ+zm45VbMZngbz0TeXxkV9qG+hsdTURERE5Drv3JSEREzniF5VU8Mm0d7/yaWe++Ef5e+Hm6k32gpBmSNcywpAL+0sV5XsbDs5PZU+JlUKKG+eyvA/li7TYe/GUtAOd2aM3TY7rROSbE4GQiIiJyOlOTQkREXFJpVQ2PTV/Pqwu3NGj/VkG+7C4qZz9VTZysYTpElHLXAOdbUl5b2ob0vQEGJWqYqdefw1frdvDX/y3G7nDQv20EE8f2YEBipNHRRERE5AygJoWIiLiUqlobT85M57k5Gxu0f5ivFwXlVewuKm/iZA0T6VfFsyOcVw/5ZlMk0zIjDErUMHNvGsGUTbuY8NF8qmrtdIoO5ukx3Ti3Q2tMJteelyEiIiKnDzUpRETEJdTa7DwzewNPzkxv0P5e7maqau0UlLvGlRM+7jaeHp5NsHdtXW317gDeXhGHA9f9kp/5wAV8sXYbF3w4j+LKGuJD/Hh8VFeu6JGAm9lsdDwRERE5w6hJISIihrLbHTw/dyMPT1vXqMdV1dqbJlAjmXBwc99ddI85MgejsNydR+YkU1nrZmCy49v56IX8uGEXA9+cTn5JJeF+Xrwyric3nJWKl7vr5hYREZHTm5oUIiJiCIfDwcvzN3Pvz2uMjnLCxqbuZ0LHfU61+2emsL/M06BEx+dmNrH94Qks2JrP2W/NIKegFH8vdx4d0YU7Brcn0Ns1c4uIiMiZQ00KERFpdq8t3MKdP64yOsYJ6xpdzK39djnVXlwcz5b9rrss545HJrBx7yHOmzyXdXkH8XAzc8sACw8N60xkgI/R8UREREQANSlERKQZvbkog9t+WGl0jBMWG1DJU8O2OtX+tz6auTlhBiWq39aHxrO3pIIrP1vCgq35mExwRVoCT4zsSkKYa680IiIiImceNSlERKRJORwO/r3Eyq3ft9zmhJ9nLS+MyMLb48gcjCU7gvlwTSy46FBM6wPjqLE5uOunVfyw4fBVH6Pbt2LimO50iQ0xOJ2IiIjIsalJISIiTcJuP9ycON6VE2aTCbvD0YypGsdscnDnWTtoH1lWV8sr8eSpeUlU21xz5Yu1d51LiI8nT8xcz8crc7A7HPSLj2Di2O4MSooyOp6IiIjIcalJISIip5TNbuffS6zc/sOfz5zw8XCjosbm0g2KCR3yGWs54FS7e3oqBys8DEp0fPNuGkHH6GCen7uRNxdnUFVrp2N0EE+P7s55HVtjMrnmFR8iIiIiv6cmhYiInBLVtTb+vcTKXT+t/tN9vN3dqKy1UVFja8ZkjdOrVRE39s51qj27IIHsQl+DEh3fp1cMYFzH1ry+KINxH86juLKGuGBfHh/Zjb/1TMDN7JpXfIiIiIgci5oUIiJy0pZs28egN2f86XYPNzOhvp7kl1Q2Y6rGaRNUwWPn5DjVPloTy+Idrju/YdvDE5i6JZfUZ39kb0kFYb5evHR+GjeeZcHbw83oeCIiIiKNpiaFiIickOLKah6cupa3f838031MJmgV6EtuUbnLNigCvWp5ZYzVqTZnayifpUfjqkMx/1+vV6ZyoKwKP093Hh7embvO7kCgt6fRsUREREROmJoUIiLSaOt2F5L28tTj7hMX7Et5tY3covJmStU47mY79w3cTmJoRV0tp9CH5xe1pdbeMm6ROFRRzU39LTw8vDNRAT5GxxERERE5aWpSiIhIgzkcDsZ/NJ8pm3L/dJ/YQB+83N3YVljajMkaw8HlXfYyNKnQqXrHL6kUV7nmUMxj+Uv3tjw5uhuJYQFGRxERERE5ZdSkEBGRBvl5cy7jPphX7355xRX17mOU/m0Ocm1anlPtyXmJ7DjUcq5CGNUulmfGdKdbq1Cjo4iIiIiccmpSiIjIca3ceYAL/7OA3X9y20aIjycHK6qbOVXjJIWW8+DgbU61d1e2ZkVukEGJGiYxzJ8dB8uw2R30jQ9n4tgeDE6KMjqWiIiISJNRk0JERI5p895DPDJ9HT9s2HXM7X6e7iSE+rM5v6iZkzVciHcNL452Huw5LTOMbzZFG5SoYUZYYlm4NZ+cglLaRwXx9OhujOsUh8nk2oM8RURERE6WmhQiIuJkW0EJT8xM59NVOcfcbjaZ6BwTzNaCEjbuPdS84RrIw2znkSE5tAqsqqtt2e/HK0visTlc84u+r6cbV/RI5Kt125lpzSMu2JfHRnblb2mJuLu1jEGeIiIiIidLTQoREQFgT3E5E2dv5P1lWdTY7Mfcp2tsCHuKK1ifd7CZ0zWUg2t65DEg/lBdpbLWzL0zUiirds23vM4xwVzcNZ63f83k/WVZhPp68uL5afzzLAveHm5GxxMRERFpVq75iU1ERJrNwfIqJs3bxOuLMqiosR1zn0h/b7zczS7cnIAhCQX8tdtep9qjc5LYXextUKLjG9kulgmd2/DivE08On09vp5uPDisE3ef3ZEgH0+j44mIiIgYQk0KEZEzVGlVDW8symDSvE0UVdb86X5tQ/3YXljWjMkaxxJexr0DtzvV3lwWx9o9gcYEqsel3dpyWfe2PD0rnRu+Xoa72cQ/z0rloeGdiQn0NTqeiIiIiKHUpBAROcNU1dp4b2kmE2dvZF9pJSYTdIkJIX3Psa+ScNUGRbhvNc+PzHKq/bA5ginWSIMSHd9furflpv4WHp+xnvEfzQcONyyeHN2V5HDXbKiIiIiINDc1KUREzhC1Njufrs7hyZnp7DxYhtlk4uKu8azOLfjTBoUr8na38eTQrYT5Hrn6Y92eAN5cFocD1xuKeV7H1jw7tgePTV/HwDdnAIdX75g4pjvdW4canE5ERETEtahJISJyBpiRkcedP64kY18xZpOJy3skYIkM5LHp642O1mAmHNzYO5eerYrrakWV7jw0K5mKWtcbMNkzLoxvrhrMM7M30PXFKdjsDnq3CWPi2B4MSXbtJVBFREREjKImhYjIGeDvX/7K3pJK/pqWyKCkSJ6ckc5na7YZHavBRqUc4OJO+U61B2clk1/qZVCi49v92EW8tnAL7Z77kcpaG5aIQJ4e053xneMwmVzvag8RERERV6EmhYjIGWDWjcPJOlDM+8uy+MdXy4yO02Cdo0q4/aydTrWXl8SzaZ+/QYmOb/vDE/h87TY6vvAThyqqaRXky2Mju3BVzyTc3cxGxxMRERFxeWpSiIic5nYdLGPSvE38Z+VWo6M0WLR/Fc8Mz3aqfbkhipnZ4QYlOr4lt44iPe8gZ70+jbziCkJ8PHnh3B7cNMCCj4feakVEREQaSp+cREROUwfLq3huzkbeWJxBVa3d6DgN4uth47kRWfh52upqy3YFMXlVK5ccivnoiC50jA7mms9/JXN/MT4ebtw/tBP3DOlIsI+n0fFEREREWhw1KURETjMVNbW8tdjKs3M2cqii2ug4DWI2Obi13046R5XW1fJLPXl8bhLVNte7TSLM14v3L+3HxNkbeHJmOm5mEzf0S+WREZ2JCfQ1Op6IiIhIi6UmhYjIacJmt/PJqhwen76e3KJyo+M02Lh2+zi//X6n2r0zUigod80rESadl8YMax4TPpoPwCXd4nlyVDdSIgKNDSYiIiJyGlCTQkSkhXM4HEzdspsHp65h094io+M0WFpsMTf12eVUe35hWzIL/AxKdHxDU6Lx83TnnimrARieGsMzY7qTFhdmcDIRERGR04eaFCIiLdiyHfu5/+c1LMrZZ3SUBmsdWMkTQ52HeH6yNoYF20MNSlS/3m3CmL81H5vdQa+4MCaO7c45KTFGxxIRERE57ahJISLSAln3FfHQL+v4fsPO+nd2Ef6etbw0OhN3s6OutmBbCJ+siwEXHIr5/9zNJlbsLCA1IpCnRnfjwi5tMJlcN6+IiIhIS6YmhYhIC7KnuJwnZ6bz/rIsHI7693cFbiY79wzcQUrYkTkZOw9588yCBGrtrjcU848i/b15dGRXrumVhLub6+cVERERacnUpBARaQGKKqp5cf4mXpy3mWpby1hOFOCSTnsZmVLgVLtrWiqHKj0MStRwwT6e3H9OJ24ZaMHHQ2+XIiIiIs1Bn7pERFxYVa2Nu35cxdu/ZhodpVH6xh3i+p67nWpPz09g20HXX57Tx8ONWwe2454hHQnx9TI6joiIiMgZRU0KEREXZLc7+HztNu6dsoa9JRVGx2mwhJByHj57m1Nt8qpWLN0VbEygRjCbTFzXJ5lHR3QhNsj1mykiIiIipyM1KUREXIjD4WBW5h5u/W4FWQdKjI7TYMHeNbw02vlqj5nZYXy5IdqgRI1zUdd4nhrdjdSIQKOjiIiIiJzR1KQQEXERq3cVcNO3y1m1q6D+nV2Eu9nOQ4O30Sa4sq6WVeDLpEXx2ByuP2RyaEo0E8f2oGdcmNFRRERERAQ1KUREDLf1QAn//GYZc7L2Gh2lERxc2W0PgxMO1lVq7SbumpZKabXrv7XEBfsy+dKzGJYaY3QUEREREfkd1/8kKSJymtpXUsEt363g2/SdRkdplEFtC7mq+x6n2mNzksgt9jYoUeN8ceUgLuzcBrPZZHQUEREREfkDNSlERJpZaVUNd/64ig+WZxsdpVFSw8q4b9B2p9q/l7dmdV6QMYEa6dmx3bljcAc83Fz/NhQRERGRM5WaFCIizaTGZufBqWt5ecFmo6M0SphPNS+MynKqTckI54ctUQYlapxzkqP58boh+HrqLU9ERETE1ekTm4hIE3M4HDw9awOPz1jvVA/09qC8upZau8OgZMfn6Wbn8XO2EuVfXVfbkO/P60vbYHe0jFsltj08gTYhfkbHEBEREZEGUpNCRKQJvbZwC3f+uMqplhweQEFZFQcrqv/kUUZzcH3P3fSNK6qrlFW7cf/MFMpr3AzM1XD/++sALuueYHQMEREREWkkNSlERJrA+8uyuPHrZU613m3COFBWRfaBEoNS1W9E8gEu7ZzvVHt4djJ7SrwMStQ453dszWd/G4iPh97eRERERFoifYoTETmFPl2Vw9WfL3GqDUuNobiymhU7CwxKVb+OkaXc2X+HU+21X9uQnh9gUKLGW377GHrGhRkdQ0REREROgpoUIiInyeFw8MXa7fz1f4ud6ud3bI3dAT9vzjUoWf0i/ap4doTzKiPfbIxkWlaEQYka7/GRXbnvnI54ureMW1FERERE5M+pSSEicoIcDgdfrtvOFf91bk6M79yGUF9PPlqxFbvDNYdi+rjbeGZ4NkHetXW1VbsDeWdFaxy0jKGYPePC+ODSfnSKCTE6ioiIiIicImpSiIg0ks1u56t1O466cuKCznFYIgJ5c7GVsuraP3m0sUw4uKXvLrrFHJmLUVDuwaNzkqisbRlXIribTUwc053bBrXH3c1sdBwREREROYXUpBARaaBam53P1m7jms9/daqPad+KgYmRvLpwCz9s2GVQuvqda9nH+A77nWr3zUjhQLmnQYkab1BiJO9d0o+UiECjo4iIiIhIE1CTQkSkHlW1Nj5ZlXPUah1DkqO4sEs8byzK4Jctuw1KV79uMcX8q69z82TSongyDvgblKjx/L3cee7cHtzQNxWzuWXcjiIiIiIijacmhYjIn6ioqeWDZdnc9sNKp3qP1qHc1N/CR8uzueW7FQalq19sQCVPDdvqVPvf+mjm5rSsFTBGtovlnYv60ibEz+goIiIiItLE1KQQEfmDksoa3l2ayX0/r3GqJ4b58/DwLvy8OZe/f7nUoHT18/Os5YWRWXi72+tqi3cE89GaWGgBQzHD/bw4UFZFiI8nL1/Qk7+lJWIyuX5uERERETl5alKIiPzmUEU1by7O4IkZ6U6rckT6e/POxX2Zl72Xa7/49ThHMJabycEd/XfQPqKsrpZX7MVT8xOptrn+gMlBiZGs2FnAgbIqJnRpwxvjexMd6GN0LBERERFpRmpSiMgZb39pJa8t3MJL8zdTbTty9YGfpzuvXtCLK3smkn2ghAkfzTcuZD0u7JjPmNQDTrW7p6dysMLDoEQNd05yNMVVNSzM2UekvzcfT+jPRV3jjY4lIiIiIgZQk0JEzlgHKmq4+6dVvL0kk8paW13dzWxieGoMF3aJx8vdzOC3ZrBsx4HjHMk4vVsVcUPvXKfaxAUJbC30NShRwwV5e3BN72TeWmKlxmbnr2mJvDyuJ2F+XkZHExERERGDqEkhImecnQfLmDRvE5OXZlNtdzht+1vPRLYXljI9I4/pGXkGJaxffHAFjw7Jcap9tCaWxTtCDErUOJPOS+PjlVt5deEWWgf58vbFfRnTvpXRsURERETEYGpSiMgZI/tAMc/P2cQnq7ZS+4fmxFW9kujRKpSnZ6ezv7TKoIT1C/Sq5ZUxVqfanK2hfJYeTUsYinlzfwsmE9z38xrsDgc39EvluXO7E+jtaXQ0EREREXEBalKIyGlv895DPDtnI1+s3e40EBNgTPtW3D+0Ex8sP3qpUVfibrZz38DtJIZW1NVyCn14flFbau2uPxQzOTyAOwZ34JUFm8k+UEJSWADvXdKXs5OjjY4mIiIiIi5ETQoROW2tzS1k4pwNfL9hJ3/oTdCnTTjXpPiRkprKoDdnGBOwQRxc3mUvQ5MKnap3/JJKcZXrD8UEeGZMN3YcLOPmb5djNpm4Y3B7nhzVDV9PvQWJiIiIiDN9QhSR086yHft5ZtYGftmy+6htqRGBPD2mG2PatyL8oS+onLPDgIQNMyD+INf0cJ6L8eS8RHYcahnLco5qF8u4TnFMnL2BXYfK6RAVxORL+9EnPsLoaCIiIiLiotSkEJHTgsPhYMHWfCbO3sCcrL1HbY8O8OHRkV0Y064V/V6fxiUfLzQgZcMkhZbz4OBtTrV3V7Rmxe4ggxI1TrifF4+N6MrKXQf45zfLcTebeHh4Zx4c1hkvdzej44mIiIiIC1OTQkRaNIfDwUzrHibO3sDibfuO2h7g5cE/+qXQJtiPm75ZbkDChgvxqeHFUZlOtV8yw/l2U5RBiRrvirQEBiRE8viM9eSXVNKjdSiTL+1H19hQo6OJiIiISAugJoWItEh2u4Mpm3OZOHsDq3YVAODt7kZlra1un7hgX9qG+vPS/M1GxWwQTzc7j5ydQ2zgkVVFtuzz45Vf47E5XH/FDoD4ED8eG9mVqZtz+ec3y/FyN/Ps2O7cObgD7m6uP9hTRERERFyDmhQi0qLY7Ha+Wb+TZ+dsYMOeQ5hMkBQWQHFV9VFLh+46VM6uQ+UGJW0IB9f2yKN//KG6SmWNmXtnplBW3TL+ejaZ4F8D2mGJDOLun1ZRWF5N/7YRvH9pPyyRLeP2FBERERFxHS3jU7CInPFqbHY+W7ON5+ZsJHN/MW5mE/3bRlBWXcu6vINGx2u0cxILuKKr8+yMR2cnsbvE26BEjdcpOphHRnThoxXZvL4oAz9Pd167oBc39bdgNreMK0BERERExLWoSSEiLq2q1sZ/Vm7lhbkb2V5YhoebmXGd4ti89xBLtu83Ol6jtQsv5Z6BziuKvLEsjnV7Ag1K1HiebmYeGNqJUF8v/v7lUkqqahiaEs17l/Sjbai/0fFEREREpAVTk0JEXFJ5dS2Tl2Xx4vzN7C4qx9vdjZHtYpmRkcePG3cZHa/RIvyqeW5EllPt+82R/GxtGctxermbqaq1c1bbCO4b2olX5m9m/tZ8grw9eP+SflzTOwmTSVdPiIiIiMjJUZNCRFxKSWUNb/9q5eUFm+tmTAR4eVBSVcOMjDyD0zWet7uNp4ZmE+pbW1dbuyeAt5bF4cD1v9THBfuy61A5Hm5mnj+3B9W1di77ZCEVNTbO79iaty7sQ2yQr9ExRUREROQ0oSaFiLiMjPwiRr8/h50Hywj09uC8jq2ZsimXkqoao6M1mgkHN/bOpWer4rraoUp3Hp6VTEWtm4HJGiYlPIDcosODR8e0b8XNAyw8OSOd5TsPEO7nxQeXnsUl3eJ19YSIiIiInFJqUoiIS1i+Yz/nTZ5HQXkV9w7piI+HG0/MTDc61gkZnbKfizrtc6o9MDOZfWVeBiVqnNSIQDL3FxPh78XbF/Vlx8FSLvhwPjU2O5d1b8urF/Qiwr/lDPgUERERkZZDTQoRMdyMjDwu+ng+lTV2bhvUjo9XbSW/pNLoWI3WJaqE287a6VR7eUk8m/a1jGGSQ1Oimb81n8z9xfytZyKX90jgvilrSN9zkNhAH/59UR/O6xhndEwREREROY2pSSEihvp8zTau/nwJtXYHwT6evLYww+hIjRYTUMXTw7Kdal+kRzFra7hBiRqnV1wYByuqmZO1l7ahfrwyrhfLduzn3MlzsdkdXNcnmRfOSyPYx9PoqCIiIiJymlOTQkQM88aiLdz+w6q6nw9VVBuYpvF8PWw8NyITP097XW3ZriAmr2rVIoZiAkzo0obv0ndiNpm4fVB7RraL5fbvV2LdX0xCqD/vXtyXoakxRscUERERkTOEmhQi0uwcDgd3/7SaVxduMTrKCTGbHNzWbwedosrqavmlnjw+N4lqm9nAZA33t56JzM7cw3fpO+kUHcwrF/Tkx427GPP+HABuHdiOp0d3w8/Lw+CkIiIiInImUZNCRJpVVa0N//s/x+5wGB3lhFzQPp/z2h1wqt07PYWCipZxK0SHqCBSIwP5dFUOnm5mnhrdjW6tQrn+q6VsLyzDEhHI5Ev7cVZCpNFRRUREROQMpCaFiDQLh8PB1+t38JdPFxkd5YSkxRZxU59cp9rzC9uSWeBnUKLGu2dIR95flsXm/CIGJETy/Hk9mLwsi0emrcPNbOL+oZ14ZHgXvD1cf4lUERERETk9qUkhIk3u1237uOnb5WzYc8joKI0WF1TB4+fkONU+WRvDgu2hBiVqvDcv7M2363cwad4mArw8ePPC3sQE+HDRfxawp7iCrrEhTL60Hz1ahxkdVURERETOcGpSiEiT2ZJfxEO/rOXHjbuMjtJoAZ61vDjaivvvRkzM3xbCp+tioIUMxbxnSEf8PN25+8fVVNbaOLdDax4f2ZVJ8zbx5brtdbd73DOkIx5uLWOWhoiIiIic3tSkEJFTbndROU/MWM9HK7a2uNkTbiY79wzcTkpYRV1t5yFvnlmQQK29ZXyRf25sD9LiQrl3yhrW7i4k0t+bDy84C7vDwaj3ZnOgrIq+8eG8f0k/OkQHGx1XRERERKSOmhQicsocqqhm0rxNvLZwCxU1NqPjNNqlnfcyIrnAqXbXtFQOVbaMFS7eu6Qvl3ZryzOzNjDqvTnY7A6u6pXEHYPb8/Av6/h5cy4+Hm68PK4ntwyw4GZuGU0XERERETlz1NuksFgsnsCrwCDAC7jfarV+a7FYbgPuAiqA261W67SmDCoirquq1sa/l1iZOHsDheXVRsdptH5xh/h7z91OtafnJ7DtoK9BiRpn8qX9uKZ3MvOz95L28lSyD5SQEOrP2xf1YcfBMga/OYOiyhqGJEfx7sX9SAoPMDqyiIiIiMgxNeRKilBgjtVqvclisaQCKywWy0bgZqAjEAfMtlgs8VartaYJs4qIi7HZ7Xy2ZjuPTV/HjoNlRsdptISQch4+e5tTbfKqVizdFWxMoEZ6dmx37j67I8VVNfzjq6V8sDwbs8nEnYM7cFWvRO78cRVzsvYS4OXB2xf14fq+KZhMLWOehoiIiIicmeptUlit1r3At7/9OtNisdQClwFfWa3WEmCzxWLZDqQBy5owq4i4CIfDwQxrHg/8vJb0PQeNjtNowd41vDQ606k2IyuMrzZGG5Soca7tnczz5/Ug1NeL79J38q/vVrC3pIIuMSG8c3Eflu84QL/Xp1FebWNM+1a8fVEfWge3nKVSRUREROTM1aiZFBaL5RogncNXV2z83aZcIKa+x2/cuLG+Xc4Yq1evNjqCyAnZXFDBG+vyWZ1fbnSURnM323n47BzigqrqapkHfHlxcTw2h+vPZwj3ceelwXG0D/Vkxeq1vLh6L/N2leBpNvHPrhEMbBXAjZ8tIP1ABYGebjzZrxUj2waSvzWDfKPDixyH3hNFXIPORRHXcKafiw1uUlgslgeAS4AxwKOA/Xeb7UC9U/I6deqEl5dXYzOedlavXk1aWprRMUQaJWt/MQ9PW8c363cYHeUEOLiqex6D2h6qq9TYTNw9PZXS6pYxP/j9S/pxda8kTCaYvDyb+6avpqiyhoGJkbx1YR+mbNrFNTPTqaq1c3HXeF4f34vIAB+jY4vUS++JIq5B56KIazgTzsWqqqrjXsDQoE/nFovlLcAP6G+1WsstFsseoNXvdmkN7DqZoCLimvJLKnhqZjpv/5pZ/84uaHDbQq7svsep9ticJHKLvQ1K1DgXdY3nnYv6EOLrRdb+Ym78ehnzt+YT6O3Bvy/qQ++4cK76bAlrdxcSHeDDWxf25oLObYyOLSIiIiJyQhqyukdfwGK1Wof9rjwV+NRisbwItOXw7R/rmiKgiBijpLKGl+Zv5qlZ6UZHOSGpYWXcN2i7U+3fy+NYnRdoTKATsOqOsXRvHUqNzc4LczfyxIx0KmttnN+xNS+N68lHK7K59bsV1P621OhL56cR4qur1URERESk5WrIlRTdgJ4WiyX7d7VbgP8Cm4BK4O9Wq9Vx6uOJSHOrrrXx/rIsnpqVzv7SqqO2p7UOZXVuoQHJGibMt5oXRmY51X7KiODHLZEGJWq8V8b15JYB7TCbTazJLeAfXy1j7e5CogK8+Xh8f1oH+3L+B/PYkl9EmxA/3rmoLyPbxRodW0RERETkpDVkdY93gHeOsWk6MPGUJxIRQ9jtDr5ev4NHpq1ja0HJUdsv75HAN+t3uGyDwtPNzhPnZBPpf2Ql5A17/Xl9WRvsDtdcdjPI24OiyiN5O0UHs+CWkQT7eFJeXcsTM9bzysIt2OwOrumdxOMju/Lygs28vigDhwNu6m9h4pjuBHh7GPgqREREREROnZYxMU5EmtSczD08MHXNUQ2IYB9PruuTzPcbdvLZmm0GpTs+Ew6u75lLn7jiulpptRsPzEyhvMbNwGR/bnBSFAu25js1KBb/axT92kYAMDdrDzd+vZytBSUkhvnzzkV9MZtNDPn3THIKSkkJD+C9S/oxKCnKqJcgIiIiItIk1KQQOYOt213IA1PXMtOa51SPCfThjkHtuaxHAm2e/NagdPUbkXyASzs7L6750Kxk9pa65lyGxDB/ksICmJV5ZJDnLQMsvHpBL0wmEwfLq7h3yho+XJGN2WTirrM7cOfgDjw+Yz3vL8vCbDJxz5COPDayCz4e+utbRERERE4/+pQrcgbaXljKI9PWHXV1RHJ4APcM6cjfeiZidzh4aqZrDs3sGFnKnf2dl0J99dc2bMgPMChR/YamRDMnay85BaV1tfwnLibc3xuHw8G36Tu49buV7C2poGtsCO9f0o+9JRX0fvUXdheV0zkmmMmXnkXPuDADX4WIiIiISNNSk0LkDHKgtJJnZm/g9UUZTvXurUK5b2gnJnSOw+GAj1dt5R9fLTMo5Z+L9Kvi2RHZTrWvN0YxPSvcoEQNNydrb92vP/vrQC7t3haAvKJybvluBT9u3IWXu5mJY7pzVa8k7pmyms/WbMPDzcxjI7pw/9BOeLq75u0rIiIiIiKnipoUImeAsqoaXl24hUenr3eqD0qM5IFhnRmeGgPADxt3cdF/FhgR8bh83G08MzyLIG9bXW1lbiDvrmyNA9ccijlxTHf6J0Ry+X8XsbuoHIBxneL4+qpBuJnN2O0OJi/P4r6f11BcWcPgpCjeubgv63YX0u2lKewvraJXXBiTL+1Hp5gQg1+NiIiIiEjzUJNC5DRWa7Pz3tIs/vX9Cqf6qHaxPDKiC33jDw9qXLA1n3Mnz6G82naswxjGhINb+u6kW8yRWyQKyj14dE4SlbWueVXB+R1b89VVg3lvaSZj3p9DWXUtw1NjeOfivrQN9Qcgc38xN369jAVb8wn09uCdi/sytn2ruisqvN3deOHcHtw2qD3ubmaDX5GIiIiISPNRk0LkNORwOPjfmm1c9dkSp/q4TnE8PbobHaKDgcODMy//dBHW/cXHOIqxzrXsY3yH/U61+2akcKDc06BE9SuaeBm7DpVzzr9n8uv2/YT4ePLGZWdxZc9ETCYTNTY7L83fxJMz06mqtTOuUxxvTOjNLOseOk+awqGKagYmRvL+Jf1IiQg0+uWIiIiIiDQ7NSlETjM/btzFhI/mO9Uu6hrPC+f2IP63f8nPKSjhxq+XOc1JcBXdYor5V99dTrVJi+LJOOBvUKL6bbr3fJLCA5g0bxNPzUyn2mbnoq7xvD6+F1EBPgCs2lXAP75ayvq8g0QH+PD6hF70bB3G379cykxrHv5e7rw5oTc39EvFbHbNW1hERERERJqamhQip4mZ1jxGvzfHqXZx13jemNCbCH9vAPJLKrjv5zV8uirHiIjH1SqgkieHbXWq/W99NHNzXHc1i08u788VaYms2lVA71d+IX3P4QbEmxf2ZnznNgCUV9fy+Iz1vLJgC3aHg2t7J/P8eT34Ys12urw4hdKqWkZYYnnnoj51TSQRERERkTOVmhQiLdzcrD0Mf2e2U+3CLm344NKzCPD2AKC4spqJszcyad4mIyIel59nLZNGZuLl7qirLd4RzEdrYsFFh2Je3iOBDy7tR63dwX1TVvPy7xoQL5zXgxBfLwDmZO7hxm+WkVNQSlJYAO9c3IfWwX5M+Gg+i3L2EeLjyYe/ux1ERERERORMpyaFSAs1O3MPI991bk6M6xTH538biNdvS1VW1dp4a7GVe6asNiLicbmZHNzZfzvtIsrraruLvXh6fiLVNtccFunn6c6Ge84jPtSf+dl7ueHrZWQfKCExzJ93LurL0N9WSSksr+Ken1bzn5VbcTObuGdIRx4a1pl3l2Zy3uR5VNbaGN+5DW9O6E10oI/Br0pERERExHWoSSHSgjgcDqZl5HHe5LlO9dHtW/Hd1YPx/K05YbPb+WjFVm74epkRMet1Uce9jE4tcKrdPT2VgxUeBiWq30/XDWFsh9YUVVRz49fLeH9ZFmaTiTsGt+eJkV3x8/LA4XDwTfpObvt+BfkllXSLDeH9S/vh4WZm2DuzWLWrgEh/bz6e0J+LusYb/ZJERERERFyOmhQiLYDd7uC7DTu59JOFTvVhqTH8cO3Z+HgcPpUdDgePTFvHs3M2GhGzXr1bF3FDr1yn2sQFCWwt9DUoUf0eGtaZB4Z1wsfDnSmbdnHTN8vJK66gU3Qw71/aj95twgHYXVTOLd8u56dNuXi7u/Hc2B7cPMDCpHmbeHbORmpsdq5IS+CVcb0I8/My+FWJiIiIiLgmNSlEXFh1rY3P1mznui9/daoPTori26sH180+cOXVOgDigyt4dIjzsM6P1sSyeEeIQYnqNyQ5ircv6ktKRCD7Siq47oulfLluOx5uZh4f2ZX7zumIp7sbdruD95Zl8cDUNRRX1nB2UhTvXNyXQxXV9HttGhv3HqJ1kC9vX9yXMe1bGf2yRERERERcmpoUIi6orKqGD5Znc8ePq5zq/eIj+PxvA4kL8aurfbl2O5f/d1FzR2yQQK8aXhmT6VSbszWUz9KjcdWhmH6e7nxw2Vlc1OXw6hz/XZ3DnT+soqC8ir7x4bx3ST86RgcDYN1XxA1fL2NRzj6CvD149+K+XN4jwWk1j3/0S+H5c3sQ6O1p4KsSEREREWkZ1KQQcSGF5VW8tdjK4zPWO9W7xobwyeX96RRz5MqDHYWl/PPb5czIyGvumPVyN9u5f9A2EkIq62o5hT48v6gttXbXHIoJcOfgDjw6ogsB3h7sPFjGP79ZxvSMPHw93XhlXE9uHmDBzWymxmbnxXmbeGpWOlW1dsZ3bsMbE3qRtb+E7i/9TPaBEpLCAnjvkr6cnRxt9MsSEREREWkx1KQQcQG7i8p5ZcFmXlmwxameEh7A+5f2Y2BiVF1tf2klD05dy4crsps7ZgM4uKLrHs5JPOhUveMXC8VVrvvXzYCESN68sDedY0Kw2x28vcTK/VPXUFpVy9CUaN69uC8JYQEArNx5gH98tYz0PQeJCfTh9fG9GZ4awwNT1/D2r5l1wzSfHNUNX0/Xfc0iIiIiIq5In6BFDGTdV8SL8zYf1XBoFeTLa+N7cUGnOEymw7dFlFbV8PzcjUyc7ZpDMQfEH+SaHs5XdTw5L5Edh1x7ic0reyZyYdd4rPuK+Wrddqf/vq2DfOkaG8rWglIi/b15bMZ6XluYgd3h4O99k3n+3DSW7zhAlxensPNgGR2igph8aT/6xEcY+IpERERERFouNSlEDLB6VwHPzd3Id+k7neqhvp48M6Y71/ZOxt3t8G0R1bU23l2aye0/rDrWoQyXFFrOg4O3OdXeXdGaFbuDDErUOJ+syuGTVTnH3JZbVM7LCzbz5uIMWgX5sq2wlOTwAN65uC9dY0O444eVfLIqB3eziYeGdeah4Z3x+m0ZWBERERERaTw1KUSaicPhYF72Xp6bs/GoVTj8PN15YGgnbh3YDj8vD+DwsqOfr93GlZ8tMSJuvUJ8anhxlPNQzF8yw/l2U9SfPMJ1dIsNYUBiJEUFBzhk9mHKptxj7hcV4E1+SSXVNjs7D5Vx75COPDqyC9O25NHphZ/IL6mkR+tQJl/aj66xoc38KkRERERETj9qUog0MbvdwY+bdvHC3I2s2FngtM3DzcxN/VN5cGhnwv29gcPNjOkZeZw7ea4Rcevl6WbnkbNziA2sqqtt2efHy7/GY3e45oodAME+h69Sub5vMm5mMxU1tdzwnxlHNSh8Pd24uGtbgrw9+Hzt4StEerQO5b2L+xEb5MNVny3h2/SdeLmbmTimO3ed3aHuqhcRERERETk5alKINJHqWhufrdnOpHkbydhX7LTNZILLeyTwxMiudQMZAZbt2M+4D+ZxoKzqj4dzAQ6u7ZFH//hDdZXKGjP3zkyhrNq1/yq5qlcSz43tTmTA4fkYH6/cyrVf/Oq0T1rrUK7rm8KAhEgenLqWj1duxdvdjefP7cHtg9rzxbrtjHh3FoXl1fRvG8F7l/SjXVTLuKVFRERERKSlcO1vFiItUFlVDR8sz+blBZvZdaj8qO0jLLE8O7Y73VoduT1gS34RV362mDW5hc0ZtcHOSSzgiq7Ot6g8MjuJvBJvgxI1TKfoYN66sA8DEiMpr67l/p/XMGneJqd9ruyZyK0D29M1NoR3l2bS//XplFTVcE5yNG9f3AcvNzcu+Gg+07bsxs/Tndcu6MVN/S2Yza571YiIiIiISEulJoXIKVJQVsVbizN4c7GVgvKjr4RIax3Ks2N7MDQ1pq6262AZt36/gp/+ZCaC0dqFl3LPwB1OtTeWxbFuT6BBiRrG38udh4d1oX9CBJOXZzP4rRlH7fPPs1L5S2sz/fv0IiO/iLPfmsGS7fsJ9vHk/Uv6cXWvJN5fnsV9U9ZQUlXD0JRo3rukH21D/Q14RSIiIiIiZwY1KUROUu6hMl5ZsIX3l2VRVl2Lxx/mEySFBfDU6G5c3DW+7l/fC8qqeHT6Ot75NfNYhzRchF81z43Icqp9vzmSn60tY2nNSH9v7p+65pjbHh7emQeHHV6FY9mKVTwzK52nZ22g2mbnwi5teG18L8qrbQx/Zxbzt+YT5O3Be5f05dreyXXLwYqIiIiISNNQk0LkBFn3FTFp3ib+u3obNTY7kf7eRAf4sKeknBobRPh78ejwrvy9bzKevy1LWVZVw0vzN/PEzHSD0x+bt7uNp4ZmE+pbW1dbuyeAt5bF4aDlfEHPKSh1+vmVcT258azUut8HgBU7D3DVjByyD1URE+jDmxN6c17H1ry+KINHpq2josbGeR1b8+8L+xAb5NvcL0FERERE5IykJoVII63aVcDzczfy/YadOByQEh5AQlgAGfuK2FpQgp+nO4+O6MKdgzsQ4H14OdEam53Jy7K45bsVBqc/NhMObuydS89WRwZ8Hqp05+FZyVTUuh3nka7J3WzigaGduaZ3EvF/uD2jrKqGR6av4/VFGTgc8I9+KTw7tge7i8oZ+MYMlu88QLifF5Mv7cel3drq6gkRERERkWakJoVIAzgcDuZm7eX5uRuZk3V4gGRa61B6twln+c4DzLTm4W42cVN/Cw8P70zUb6tI2O0Ovl6/g8v/u8jI+Mc1OmU/F3Xa51R7YGYy+8q8DEp04kwmuK5PMsNSYzGbYMWuApbvPIDDAXaHg5nWPD5ZlVO3/3mJwfRuE86keZt4ef5mqm12Luvellcv6EWEv2sPBRUREREROR2pSSFyHHa7gx827uKFuRtZuasAgHOSoxndvhWzs/bw9m8zJS7uGs/TY7qRHH5koOQsax6j3ptjSO6G6BJVwm1n7XSqvbwknk37Wu5gSIcDJi/LZvKy7AbtPyXnEFNylgIQG+jDvy/qw3kd45oyooiIiIiIHIeaFCLHUF1r439rtjFp7ias+w/fAnFB5zgu657Az5tyuffn1TgcMCQ5imfH9qBXm/C6x67ceYBh78yitKr2zw5vqJiAKp4e5vwl/ov0KGZtDf+TR7iuUe1iOTspGjezCZMJTIDZ9P+/Pvz/X6/fwaKcI1eK3NTfQrdWIZgwsXPHDhIS2uLpZmZ0+1YE+3ga92JERERERERNCpHfK62q4YPl2bw8fzO5ReW4m01c1SuJ6/ok8136Tq7832KqbXa6xobw7NgejLDE1M0syNxfzNlvzSC/pNLgV3Fsvh42nhuRiZ+nva62bFcQk1e1ajFDMT3czLx4XhqXpyUQ6nv821F2HSzjpm+XsyhnHz4ebjw5qhu3DmyH++9WX1ntXkRaWlJTxxYRERERkQZSk0KEw0uCvrU4gzcWZ1BYXo2vpxu3DWrHDf1S+X7DTs6dPJfiyhriQ/x4cnQ3Lu+eULecaF5ROb1f/YU9xRUGv4pjM5sc3NZvB52iyupq+aWePD43iWqb+TiPdB3+Xu7MvGEYvduEH3eQpc1uZ1HOPr5L38nHq7ZSWlXL0JRo3r6oL0nhAc2YWEREREREToSaFHJGyz1UxisLtvD+sizKqmsJ8fHk0RFduPGsVH7alMuwt2eRV1xBqK8nL52fxj/7W/D6bRnL/aWVdJ70E/tLqwx+FX/ugvb5nNfugFPt3ukpFFS0jNsaArw82Hzf+cddArTGZmde9l6+Td/Bjxt31f1+hPt58eoFvbi6V5JW6BARERERaSHUpJAzknVfEZPmbeK/q7dRY7PTKsiXJ0d15bo+KczJ2sM5/55Jxr5ifDzceGBoJ+4Z0pGg3+YV7Ckup9MLUzhUUV3v84T5etE21I/VuYVN/ZKcpMUWcVOfXKfa8wvbklng16w5TlSAlwfzbx5Bt1ahx9xeWWNjVmYe36XvZMqmXA7+9nsR6e/NP/qlcGGXeAYnReHh1jKuFBERERERkcPUpJAzyqpdBTw/dyPfb9iJwwGpEYHcM6QjV6QlsHJnAWPen8Ov2/djNpn4e99kHhvRte5f8TP3F9PjpZ+pqLE1+PkKyqsoKG++Ky3igip4/Jwcp9ona2NYsP3YX/Zd0fuX9OPqXkl1t9P8v7KqGqZlHG5MTN2SWzeYtHWQL3/tmciEzm3onxCBm1mNCRERERGRlkpNCjntORwO5mbt5fm5G5mTtReAtNah3De0Exd0isO6r5hLP1nIlE2Hrzy4oHMcz4zuTruoIBwOB4ty8jn7rZlGvoR6BXjW8uJoK+6/+34+f1sIn66LgRYyFPP6vik8M6Y7YX5HBmIWV1bz8+bdfJe+k+kZu+saRAmh/tzQrw0XdmlDr7jwoxoaIiIiIiLSMqlJIactu93B9xt38sLcTazaVQDA0JRo7j2nE0NTotldVM4NXy/j45U52B0O+reN4Llze3BWQiQ1Njufrsrh6s+XGPwqjs/NZOeegdtJCTsytHPnIW+eWZBArb1lXFEQ5O3BtH8MpU98BACF5VX8uHEX36XvZHbmHqpth1cjaRcZyIQubZjQOf7wEqKaMyEiIiIictpRk0JOO9W1Nv67ehsvztuEdX8xJhOM79yGe8/pSO824RyqqObBqWt5fVEGlbU22kUGcn3fFNqG+vPDxl0MfHOG0S+hQS7tvJcRyQVOtbumpXKo0sOgRI330vlp/GtgOw6UVfHu0ky+S9/JvOy92OwOALrEhDChy+ErJjpEBxsbVkREREREmpyaFHLaKK2qYfKyLF5esIXdReW4m01c3SuJu4d0pH1UEBU1tdz63QreWmJ1etzWglLu+mn1CT1n6yBfcovKT0X8BusXd4i/99ztVHt6fgLbDv75Chiu5tJubbnr7A78un0fw96exaJt+3Ac7kvQKy7s8BUTXdqQHB5obFAREREREWlWalJIi1dQVsWbizN4c3EGheXV+Hq6cVHXeEZYYiiurOHFeZv4z8qtf/r4mt9uJ2iMS7rFY91XzPq8gycTvVESQsp5+OxtTrXJq1qxdFdws2U4WT4ebgxJjmZ7YSm9X/0FAJMJ+reNZEKXNozv3IY2IS1jBRIRERERETn11KSQFiv3UBkvL9jM+8uyKK8+suJGZY2db9bv4Jv1O075c45sF8va3EK+Wnfqj/1ngr1reGl0plNtRlYYX22MbrYMp0pFjY1ftuzGbDJxTnI0E7q04YLOccQEtpyrQEREREREpOmoSSEt0udrtnHNF78edRWEm9lESngAHaOD6RgdTIfoYDpEBbEmt5D0vIO8vGDzST3vjIy8k3p8Y7ib7Tx8dg5xQUeWMM084MuLi+OxOVxzKOY5ydHcNMDCRf9ZcNQ2DzczQ1MONybGdYwj3N/bgIQiIiIiIuLK1KSQFslkAktEIIlh/nSKCaZDVDCdYoJJjQjEy93Nad+tB0pYtesAH63481s+jiXAy4OBiZH8smV3/TufUg6u6p7HoLaH6io1NhN3T0+ltNp1T9nXx/fi1YVbjmpQnN+xNRO6xHNex9YE+3galE5ERERERFoC1/3GI3Icl3VP4LLuCX+63eFwsHjbPl5ZsIWfNu2qG8rYEP3bRnCwoprN+UXN3qAY3LaQK7vvcao9NieJ3GLXveog0NuD4soabv1+pVP9o7+cxYTObfD3ajmrjYiIiIiIiLHUpJDTSo3Nztfrd/Dawi2s2lVQ/wOOYcn2/ac4Vf1Sw8q4b9B2p9q/l8exOs/1V7corqxx+nn93efSKSbEoDQiIiIiItKSqUkhp4WD5VVMXpbNG4sz2F1UjskEEf5e7C+tqv/BBgrzreaFkVlOtZ8yIvhxS6RBiU5MVIA3b07ow/jOcZhMJqPjiIiIiIhIC6UmhbRo2QeKeX1hBv9ZuZWy6lo83Q4PlHQ4cOkGhZebjcfP2Uqk/5GrEDbs9ef1ZW2wO1z7S/6odrEs3raP0qpa3M0m7hjcgYeHd9ZtHSIiIiIictLUpJAW53jzJqr/sNqHqzHh4PqeufSJK66rlVa78cDMFMpr3I7zSOP9eN0Q1u8u5Nk5G6mosTE4KYo3J/SmQ3Sw0dFEREREROQ0oSaFtBj/P2/i1QWbWZ1baHScRhuRfIBLO+c71R6alczeUi+DEtXPw83M5vvOZ1tBKf/6bgXW/cVEBXjz7sV9ubxHgm7tEBERERGRU0pNCnF5B8ureH9ZFm8utrK7qNzoOI3WMbKUO/vvcKq9+msbNuQHGJSoYab9YyidooO5+6fVfLluO2aTiZv7W3hydDctJSoiIiIiIk1CTQpxWf8/b+KjldmUV9tO+Dhe7maqapv/NpAo/yomDs92qn29MYrpWeHNnqUxnh7djdsHt+e9pVlc8vFCSqpq6N0mjLcu7EOP1mFGxxMRERERkdOYmhTiUhwOB4ty9vHKgs1M2ZzrNG+isVoF+bK7qLzZGxQ+7jaeGZ5FkPeRxsrK3EDeXdkaB657e0S/+Ai+vnoQ2wpKOeu16aTvOUiIjyfvXNyX63onYza7bnYRERERETk9qEkhLuF48yZiA31IDAtg8bZ9DTqWp5uZapu92W8NMeHglr476RZTWlcrKPfg0TlJVNa69lDMRbeMJCUikAemruGjFVsBuKZ3Es+O7UGEv7fB6URERERE5EyhJoUY6s/mTfh7uTOhcxvSWofx3rLMBjcowJgVPs617GN8h/1OtftmpHCg3LVnNzw3tgd3DG7PhyuyOf+DeRysqKZLTAhvXdibsxIijY4nIiIiIiJnGDUpxBBZ+4t5fVEG//ndvAk3s4nhqTH8NS2R7q1CeWDqGm77YaXBSY+ve0wxt/Td5VSbtCiejAP+BiVqmLTWocy4YRjbCksZ+OZ0VuwsIMDLg1fG9eSm/hbc3cxGRxQRERERkTOQmhTSrNbnFfL49PVO8yZ6xoVxRY8ELu3eFnezmWfnbOC6L3897iyJtqF+bC8sa6bUR2sVUMmTw7Y61f63Ppq5Oa4/WHLlHWNIDAvgkWnreOfXTOwOB5d1b8uk89KIDfI1Op6IiIiIiJzB1KSQZnXj18tYsbOA+BA/rkhL4PIeibSPCqKsqobXFmUwad4miitriA/xI9Dbgw17Djk9PirAm0W3jOKeKasNaVL4edYyaWQmXu5HJnou3hHMR2tiwYWHYsLhWzvuOrsDn63dxtj357KvtBJLRCBvTOjN0NQYo+OJiIiIiIioSSHN6z9/6U9BWRV94yMwm03U2Oy8vcTKU7PSyS+pJNzPi/Gd2/D9hp1HPTb9nvMwm0zc8t0KZlrzmjW3m8nBnf230y7iyNyM3cVePDUvkRq7a98a0T4qiOW3jWb7wTKGvTOLBVvz8fFw45kx3bhzcAc83V17qKeIiIiIiJw51KSQZmWJDALAbnfwxdptPDptPVsLSvDzdK9rTvyxQbH4X6OI9Pfm7p9W8dOm3GbPfFHHvYxOLXCq3T09lYMVHs2epbFW3zmW5PAAnpq1gVcWbKbW7uD8jq155YJetA117bkZIiIiIiJy5lGTQpqVw+FgpnUPD/2ylrW7C/FwMzO2QyvmZe89qjnx03VD6BwTwq3fr2CKAc2J3q2LuKGX8/NOXJDA1kLXn9vw5KiuPDisM99t2Mm4D+aRW1RO21A/Xhvfm3M7tDY6noiIiIiIyDGpSSHNZsXOAzw4dQ3zsvMBGJoSzfbCMqZu3u203/uX9GN0+1iu/2oZ07bsPtahmlR8cAWPDslxqn24OpYlO0OaPUtjtQ7yJeOBcewuKmfs5LnMyMjD083Mw8M7c//QTvh46JQXERERERHXpW8s0uQy8ot4ZPo6vks/fKXEWW0jqLHZmZO112m/x0d25Z9npXL5fxdx/VdLmz1noFcNr4zJdKrN3hrK5+nRuPpQTIBlt42mc0wIz8/dyPNzN1JVa2dYagxvTOhNakSg0fFERERERETqpSaFNJndReU8MWM9/1m5FZvdQZeYEEJ8PVmwNd9pv6t7JfHi+WmM+2Aej89Y3+w53c127h+0jYSQyrra1kIfXljUlloXH4oJ8MDQTjw9pjvTtuymy6QpbC0oITbQh5cv6MVFXdpgMrl+g0VERERERATUpJAmcLC8iufnbuKNRRlU1tpIDg8gPsTvqCsnBidF8dWVgxj13hzCH/nKgKQOrui6h3MSD9ZV7A64a5qF4irXPzVCfDzZ9vAEDlVUc9F/FvD9hp24mU3cObgDj47oQoC36w/2FBERERER+T3X/yYmLUZ5dS1vLMrghXmbOFRRTWygD+2jgpiTtZfsAyV1+7UJ8WPeTSMY+/4coh772pCsA+IPck0P52VMn5ibyM4iH0PyNNa8m0bQNz6c1xZm8OSs9ZRX2xiQEMmbF/amc4zrz84QERERERE5FjUp5KTV2ux8uCKbp2amk1dcQYiPJ0OSo5iXnU9ecYXTvituH8PFHy8g6ZnvDcmaHFrOA4O3OdXeXdGaFbuDDMnTWDf1t/DaBb1YmJNPj5ensiW/iAh/L96c0Icreybq1g4REREREWnR1KSQE+ZwOPg2fSePTFtH5v5ifDzcGJgYydrdhXUrePy/7645mxu+XkrvV38xJGuITw0vjnIeijnVGs53m6MMydNY7mYTux69ELsDrvp8CZ+t2YbJBDeelcrTo7sR4utldEQREREREZGTpiaFnJA5mXt48Je1rNpVgJvZRL/4CPKKy1mUs89pvxfPT+PxGeuZ8NF8Q3J6utl5dMhWYgKq62qb9/nxyq/x2B0t46qD7685m7EdWvHOr5k8PG0dxZU19IwL480JvenVJtzoeCIiIiIiIqeMmhTSKGtyC3hg6lpmZ+4BIK11KNU2O0t37Hfa79reyXy0Mpu7f1ptREzAwbVpu+nfpqiuUlFj5r4ZKZTVtIw/9lekJfD+Jf1Yu7uQPq9OY+3uQoJ9PHnzwt78o28KbmbXX3lERERERESkMVrGtzUxXPaBYh6Zto6v1u0AoGN0EF7ubqzOLXTar1dcGCt3FfDhimwjYgJwTmIBV3R1XknkkdlJ5JV4G5So8TLuH0eorxe3fr+CycsO/7e8smciz5/bg8iAljHcU0REREREpLHUpJDj2lNczlMzN/DB8ixq7Q4Sw/wJ8fE8qjnh6Wam2mZn5a4Cg5JC+4hS7h6ww6n2+tI41u8NNChR471/ST+u7pXERyuzeeDntRSUV9EpOpg3L+zNwMSWMT9DRERERETkRKlJIcdUVFHNpHmbeG3RFsqrbcQG+hDp7826vIPH3L/aZm/mhEdE+FXz3Igsp9r3myP52RphUKLGG5oSzZdXDmLHwTIGvTmDpTv24+/lzqTz0vjXwHZ4uOnWDhEREREROf2pSSFOKmts/HuJlWfnbKCwvJowXy8SQwPYuPfQUcuJGs3b3cZTw7IJ9amtq63NC+Ct5XE4aBlDMQEW3TKSTjHBPDZ9PW8utmJ3OLioazwvnZ9G62A/o+OJiIiIiIg0GzUpBIBam51PVuXwxIz15BaVE+DlQYeoILYVlrJx7yGj4zkx4eCffXaRFltSVztU4c5Ds5OprHUzMFnjXN4jgQ8vO4tv1u/g4o8XsrekgpTwAF6f0JsRllij44mIiIiIiDQ7NSnOcA6Hgx837uLhaevYkl+El7sZS0QghRVVbM4vqv8Av0kODyD7QEn9O56k0an7uaij8zKnD8xMZl+ZV5M/96m07u5zcTebGfPeHOZm78Xb3Y0nR3Xl7iEd8XJvOY0WERERERGRU0lNijPYwq35PDh1LUt37MdsMpEcHkBljQ3r/uIGHyM+xA8PN3OTNyi6RJVw21k7nWovLY5n837/Jn3eU21QYiQ///0cJs7ZyEvzN1NjszOmfSteG9+LxLAAo+OJiIiIiIgYSk2KM9D6vEIenLqW6Rl5wOFGg93haFCjITUikHvP6UhBWRUvzd/MjoNlTZo1JqCKp4c5L2f6RXoUs7aGN+nzNoVfrh9KZa2NTpOmsPNgGW1C/Hj1gl6c37E1JlPLmaEhIiIiIiLSVNSkOIPkFJTw2PT1fL52Gw4HxAb6kFdc0aBGQ/dWodw3tBPB3h6Mem9Ok2f19bDx/IhMfD2PrBqydGcQk1e3ghY0FBMgxMeTX/4xlKdnpTN182483MzcP7QTDw7thJ+Xh9HxREREREREXIaaFGeA/JIKnpm1gfeWZVHzu6VCG7Jax4CESO4f2onconIu+2RhU8YEwGxycHu/HXSMOtI42VvqyRNzk6i2tbxlOO8Y3J4ALw+GvDWTylob5yRH88aE3rSLCjI6moiIiIiIiMtRk+I0VlxZzcvzt/Dygs2UVdcS6utJYXl1gx47sl0sN/e38NmabZw7eW4TJz1sfPt8zm13wKl27/QUCio8m+X5T7XbBrXj5025ZB0oITrAh5fGpXFpt7a6tUNERERERORPqElxGqqqtfHOr5lMnL2BA2VVRAV48/y5PfD38uDqz5f86eNMJhjXKY4+bcJ5deEWzv9gXrPkTYst4qY+uU615xa2JavAr1me/1SLCfQhLtiX1xZmYDaZuHVgOx4f2ZUgn5bZbBEREREREWkualKcRmx2O/9bs43Hp69nx8EyArw8eHJUV24b1J73lmZxy3crjvk4d7OJXnHhRAV688OGXfywYVez5I0LquDxc3Kcah+vjWHh9tBmef6mcqCsij3FFfSLj+DNC3vTrVXLfj0iIiIiIiLNRU2K04DD4WDqlt08NHUtG/cewtPNzO2D2vPA0E58tW4HQQ9+4bS/u9lErd0BgJvZRLifN0t37G+2vAGetbw02orb70ZMzN8WwqfrYmhpQzGPJdDLg+fO7cHVvZIwm1v+6xEREREREWkualK0cEu27ePBqWtZvG0fZpOJq3ol8diILvySsZuox74+av9usSFc2yeZW79fCYDN7mBvSf0DNE8FN5OdewduJznsyPPtOOTNxAUJ1NpbxlDMIG8PEsMCWLu78Jjb/943mYljehDm59XMyURERERERFo+NSlaqI17DvLQL+v4efPhWQ7ndWzNE6O6sjhnH4nPfO+078PDOxMd4MMt361gXd7BugZF83FwWee9DE92/mJ/5y+pFFW1jCU4TSa4plcyz4zpxub8Ii7/7yLySyrrtndvFcqbF/amb3yEgSlFRERERERaNjUpWpgdhaU8PmM9n67OweE4vEToIyO6sH53IT1emuq071W9kugSE8x/V2/703/5b2pntTnEdWm7nWpPzUtk+yEfQ/KciN5twnh9fG/SWofx4vxNPPTLOuyOw7fLBHp78PTobtx4Vipu5pZxNYiIiIiIiIirUpOihThQWsnEORt4e0km1TY7nWOCuevsjuQUlDDy3dlO+8YG+tApJoT/rc7hY7sDNwPmIiSElPPw2ducau+tbMXy3OBmz3KiIv29eXZsD67smUhRZTUT/jOfKZuOrEJyRVoCL5ybRnRgy2m4iIiIiIiIuDI1KVxcaVUNry7cwovzNlNSVUN8iB/X901hb0nFMZcTNZtM5BVXkFdcQdfYEML9vMg6UMLOg2XNkjfYu4aXRmc61WZkhfHVxuhmef5T5fZB7Xl0RBeCfDxZm1vIxR8vYFthKQDto4J4c0Jvzk5uWa9JRERERETE1alJ4aKqa21MXpbN07PTyS+pJNzPi8u6p1BcWcPD09b96ePC/bz4S4+2hPt58+PGXczJ2tsseT3Mdh46O4e4oKq6WuYBX15c3Babo+WscDE0JZpXL+hFh+hgAD5YnsW/vltBVa0dX083Hh3eldsGtcPT3c3YoCIiIiIiIqchNSlcjN3u4It123ls+jpyCkrx93JnWGoMtTY77y/LOuZjPN3MnNexNX/rmUiNzcFzczawOre5ZlA4uKp7HoPaHqqr1NhM3D09ldLqlvPHKz7EjxfP78n4znGYTCbsdgf/+HopH63YCsD4zm14eVxP2oT4GZxURERERETk9NVyvkWe5hwOBzOseTw0dS3r8g7ibjaRGOaPu9nM7Mw9x3xM7zZhXNkziUu6tWXJtn08OTOdNc3WnICzEwr5WzfnbI/NSSK32LvZMpwsb3c37j2nI/cM6Yiv55HTIXN/MR+t2EpimD+vj+/N6PatDEwpIiIiIiJyZlCTwgUs37GfB6euZf7W/Lqap7uZnILSo/aNDfThr2mJXNkrifZRQSzZto+R786uW73Dw81Mjc1et7/JBL8tRHHKpIaVcd+g7U61t5bHsSYv8NQ+URMb37kNL56fRttQ/6O2tYsKYt3d55IcHoCPh04TERERERGR5qBvXwbKyC/ioWlr+WHDrqO2VdXauSItgWBvT/63Zhuj28VyZa8khqZE1y11WWuzc8nHC8kvrSDI24Nqm52KGpvTcU5lgyLMt5oXRjrfcvLjlgh+yog8dU/SDNpHBfHKuJ4Mt8Qed7/OMSHNlEhERERERERATQpD5JfXcP2XS/nPyq3Y/9BF8PFw4+99U7hjUHvif/sX/tcn9D7mceZl72VvSQUARZU1TZbXy83GE0O3EuF35DnS9/rz+tI2OGg5QzEDvT14bEQXbh7QDg83s9FxRERERERE5A/UpGhGheVVPDdnI28szKba7tycCPX15JYB7bi5v4Vw//pnOizfsZ9R781pqqgAmHDwj1659G5dXFcrqXLjgVkpVNS0rNUtruqVxMQx3YkO9DE6ioiIiIiIiPwJNSmaQXl1La8v2sILczcddcVDXLAvdw7uwHV9kvHz8qj3WOvzCnl02np+3pzbVHEBGJF8gEs75zvVHpqVzN5SryZ93lOte6tQ3rywN33jI4yOIiIiIiIiIvVQk6IJ1djsfLA8m6dnpbOnuMJpW8foIO4Z0onLurdt0K0HGflFPD5jPV+v39FUcQHoFFnCHf13OtVe+bUNG/MDmvR5T0aoryeF5dVH1d+7pC/X9ErGbG45t6SIiIiIiIicydSkaAJ2u4Nv0nfw6LR1ZB0ocdo2ICGS8W28uPXcwQ368rytoISnZm3g01U5R82vOJWi/KuYODzbqfbVxihmZIU32XOerIeGdWbnoTI+XZXjVL+4azzvXNyXYB9Pg5KJiIiIiIjIiVCT4hSbnbmHB6euYXVuoVP93A6tufecjvRPiGT16tX1Nih2F5XzzKwNfLA8i9rf5le4//aYWvupa1b4uNuYOCKLQK8jq4KsyA3kvZWtXXYo5tCUaL65ejBXf/4rP250XhllzV1j6RobalAyERERERERORlqUpwiq3YV8ODUNczJ2ltXczebuLxHAncP6UjH6OAGHWd/aSXPz93I20syqaw93DiIDvAhIdSfnMIS8ksqT0leEw7+1W8nXaNL62oHyjx4bG4SlbWuORTT3Wxi60PjiQrwwfve/zlt+0e/FP59YR9MJtdsrIiIiIiIiEj91KQ4SZn7i3lk2jq++d2sCD9Pd/7eN5nbB3WgTYhfg45zqKKal+Zv4rWFGZRV1wLQNz6cWwa0Y1HOPt5dmnnKMp/fbh/j2u93qt03I4UD5a57e8SCm0cyIDGSVbsKiH/qO6dtmQ9cQFK4687MEBERERERkYZRk+IE5RWV89SsdD5Yno3tt9svwv28uGVAO27qbyHMr+GrYDgcDrq/9DM7D5bh6Wbmbz0TuWVAO3rGhVFSWcNf/7f4lGTuHlPMLX2db494YVFbrAca1kgxwpsX9ubGfqkcrKjmhq+XMnnZkbkZf+uZyAeX9sPNXP/gUREREREREXF9alI00qGKal6Yu5HXF2VQUXP4doz4ED/uOrsD1/ROxtez8f9JTabDt4X4ebrz9z7JRAb44HA4+HLtdi7/76KTztwqsJInh251qv13XQzztrnu7IaU8ADW3X0eHm4m3l+WxcO/rKOgvKpu+8wbhjE0NcbAhCIiIiIiInKqqUnRQBU1tby12MpzczZysOLwcpedY4K5Z0hHLunWsGVEj+eZMd3rfr2toITkiT+c1PEA/D1reWFkJl7uRwZtLtoezH/WxoKLDsUEWH3nWLq1CuXXbfu47YeVrMktxN/r8B/VEZZYPrrsLKIDfQxOKSIiIiIiIqeamhT1qLXZ+XjVVp6ckU5uUTkAgxIjufecToxqF3tKBzXW2OyMfHc2C7bmn9Rx3EwO7uy/nXYR5XW13CIvnp6fSI3ddW+NGJAQyex/DudAWSVXfbaE/64+vLToX9MSee7c7sQE+hqcUERERERERJqSmhT1GP7OLBbm7ANgXKc47j2nI33jI07580yau4n7p6456eNc1HEvo1MLnGp3T0vlYKXHSR+7PgVPX8qW/CIGvDG90Y/9318HMKFzG15buIWnZqVTWlVL91ahvDa+F/0TIpsgrYiIiIiIiLgaNSnq0S4qiJSIQO4Y3IH2UUGn/Pjzs/cy9O1ZJ32cPq0P8Y9eu51qExcksLWw6a8+2PvExVTW2Ljl2+V8vnZ7ox7r7e7GijvGkHuonG4v/ox1fzFhvl5MuiiN6/okayimiIiIiIjIGURNinq8fVHfJjnu1gMlpD77w0kfJz64gkeH5DjVPlwdy5KdISd97Pr8eN0QhiRFMWneZp6ald7ox5/XsTWPj+zKw7+s5adNuZhNJm7qb+GJUV0J9W346igiIiIiIiJyelCTopntLa7gpjnbWZW/+aSOE+RVw8tjMp1qs7ND+XxDNE09FPOSbvF8/Jf+fLluB22f/o7C8upGH+OR4V2wOeyc9fo0qmrtDEqM5NXxvega67orjoiIiIiIiEjTUpOiGZVU1tDqiW9O6hjuZjsPDNpG25DKutrWQh9eWNSW2mYYipnz0HjyiisY/NYMVuwsqP8Bf2AywfV9U/jPymx2HSqnVZAvL5zXg0u7tT2lQ0hFRERERESk5VGTopn8vDmXcR/MO4kjOPhr1z0MSTxYV7E74K5pFoqrmv638eurBtMzLowHpq7hi0bOnfh/Ph5utAry5b2lWXi6mbl/aCceGNoJf6+mH+opIiIiIiIirk9NiiaWV1ROwtPfUWt3nPAxBsYf5OoeeU61J+YmsrPI52TjHVeEvxfW+y/A3WzihXmbuPjjBQ1+rNlkwu5wfs0VNTayD5QwtkMrXh7Xk+TwwFMdWURERERERFowNSma0NrcQnq+MvWEH58cVsYDg7Y71d5e0ZpVu0/9KiN/tO7uc+kYFcz/1mzjgalr2FNccdQ+/eIj2F1czs6DZU71X28dxfSMPJ6c6TxMMzk8gFcu6MWY9q2aNLuIiIiIiIi0TGpSNIE9xeVc+8VSZlrz6t/5d5LCAthaUEKoTzWTRmU5bZtqDee7zVGnMuYxfXrFAC7vkcCv2/Zx1uvTWLnr6LkTtwywcLCims/WbOP3F0u8dH4aV/ZK4m//W8z0jCOv3c/TnYeGdeb2we3xcndr8tcgIiIiIiIiLZOaFKdQeXUtryzYzMTZG6mstR13XzezCdtvt4Akhwfg4+GGdV8hzwzbSnTAkdUyNu3z49Vf47E7mm6oZKS/N8+M6c5VvRLZXVTB5Z8u4st124/ab+KY7twzpCNvLM7gzh9XkRQWwH1DO5IUFsDgpCjW7T5I71d+YVthad1j/tK9Lc+fl0arIN8myy8iIiIiIiKnBzUpTpFZ1jz+/uVScovK/3SfCzrHUVpVy/zsPdTaHSSG+RMd4EP6nkIu7bSD2/sW1e1bXmPm/hkplNWcmt+iu87uwEvznZc99XAzc9vAdjw0vDOB3p6882smt3y3nD+MkuD8jq354spBdVdBXNM7iYRQf0a1i8Xzt9rHK7dy0zfL65ozXWNDeG18LwYmNv3VHyIiIiIiInJ6qPcbsMVi8QKuBUZYrdbxv6vfBtwFVAC3W63WaU2WsgV4af7mYzYoIv29uaZ3EpW1Nj5cvpWSqhoifNzp3iaSLfmH8DFn8NqYvU6PmbjAwtbCY//W3H12BypqbLy1xNrgbLsfu4iqWhvv/JpJWXUtAOd1bM2k89JIiTgyvHLq5lynBkWgtwfZD44nzM/L6XiB3p6c3ykOgKpaG3f8sIp3l2YCEOLjyVOju/GPfim4mZt+SVQRERERERE5fTTkn+mtwFog4P8LFoslCbgZ6AjEAbMtFku81WqtaZKULcA3Vw/mpm+XU1BWxfSMPDpFB/Ovge2osdmZOHsDecUVBPt4Mr5zGzbn7mNXYSaPD9nhdIz3VrZlea4fAIOToli+40DdlQnX9UkmLS6M5+ZsPGpQJUBqRCDzbx5B7OPf1NXeubgv1/dNYdfBMrq99DNl1bV0iAri5XE9GW6JPeoYP1x7Nvf/vJaXF2xmzV1j6RobetzXnF9SwQUfzmPFzgJMJvhH31SeGt3tqKaGiIiIiIiISEM0pEnR7bf/Pfy72njgK6vVWgJstlgs24E0YNkpztdi+Ht58MnlAwCw2x0s2b6Pm79dzqa9RXi5m7l1YDuyD5SwJCeLZ0dkOz32py3RTMuKoNpmp3NMMBPH9mB0u1iemJFOTmEJDw/vwtrcQi7/76JjPrf1gXF1y3kOT41hVuYe9j15SV2zwMvdzFltIxjTvhU39EvF3e3YVzi4mc1MOj+NSeenNeg1f7l2Oyt2FtC/bQSvje9N99bHb2qIiIiIiIiIHE+9TQqr1XrIYrH8sRwHbPzdz7lAzCnM1aKZzSbu/HEVW/KLuaZ3Eo+N6EpRRRmzNr3Ohe1q6/ZrE9oBL+8R/Pj9LNqE+PDEqK5c0SOh7jaJx0d1rdvX4XDwz7NSefvXzLra3JtGMDjJeebD9BuGHZUnMsCHqdcPPdUvk+v6JHNWQiRprUMxmZpusKeIiIiIiIicGUyOP05JPAaLxXI28LDVah32289vA6usVusHv/38BfCZ1Wr96ViPX716dVtg2ynK3CLsKavG7oBYPw92Vv9Ksf3IkpzueJPqPQo3kwcOh4MthZUkBXvh9SdXOPxecbWNAxW1JAbplgoRERERERFpsRLS0tK2/7F4oktH7AFa/e7n1sCu+h7UqVMnvLzOnC/X6bvmsWbHj061CWl3k7V5B2lpR26p6NncwUQEgNWrVzudiyLS/HQeirgGnYsiruFMOBerqqrYuHHjn24/0SbFVOBTi8XyItAWCAXWneCxTju7CrcwZ/PHTrURHa8jNiTlt592HP0gERERERERkTPcCTUprFbraovF8l9gE1AJ/N1qtdZ/38hp7lB5Pj+secWp1jvhXDq0GmBQIhEREREREZGWo0FNCqvVOh+Y/4faRGDiqY/U8lTVlPPNquepsVXV1RIjujMw9RINlBQRERERERFpoBO93UMAu8PGrE0fsefQkSVFA33COa/brXi4eRqYTERERERERKTlUZPiBK3ZPoP03HlOtYt63o+/d7AxgURERERERERaODUpGmnb/nQWWD9zqo3ufANRQQkGJRIRERERERE5PahJ0UAFpbuZsu4Np9pZyRNIje5tUCIRERERERGR04uaFPWoqC7lqxXP4ODI4iWW6L70TRqnoZgiIiIiIiIip5CaFPX4csXTdb8O82vF6K434m72MDCRiIiIiIiIyOlJTYoGMJnMXNzrfnw9A42OIiIiIiIiInLaUpOiHlcPeM7oCCIiIiIiIiJnBLPRAUREREREREREQE0KEREREREREXERalKIiIiIiIiIiEtQk0JEREREREREXIKaFCIiIiIiIiLiEtSkEBERERERERGXoCaFiIiIiIiIiLgENSlERERERERExCWoSSEiIiIiIiIiLkFNChERERERERFxCWpSiIiIiIiIiIhLUJNCRERERERERFyCmhQiIiIiIiIi4hLUpBARERERERERl6AmhYiIiIiIiIi4BDUpRERERERERMQlqEkhIiIiIiIiIi5BTQoRERERERERcQlqUoiIiIiIiIiIS1CTQkRERERERERcgpoUIiIiIiIiIuIS1KQQEREREREREZegJoWIiIiIiIiIuAT3ZnoeN4Dq6upmejrXV1VVZXQEEUHnoogr0Hko4hp0Loq4htP9XPxdX8DtWNtNDoejyUOsXr16ALCoyZ9IRERERERERFqCgWlpaYv/WGyuKylWAgOBPYCtmZ5TRERERERERFyLGxDD4T7BUZrlSgoRERERERERkfpocKaIiIiIiIiIuAQ1KURERERERETEJahJISIiIiIiIiIuQU0KEREREREREXEJalKIiIiIiIiIiEtoriVIz1gWi8ULuBYYYbVax/+ufhtwF1AB3G61WqcZFFHktGexWDyBV4FBgBdwv9Vq/VbnoUjzslgsZmAGEA84gFutVusMnYsixrBYLL8AeVar9e86D0WMYbFYNnH48ynAQqvVeu2Zfj5qCdImZrFYtgNrgQCr1Trst1oSMA1IA+KA2UC81WqtMSqnyOnMYrFEA/1/a0ykAiuAPsAUdB6KNBuLxWICoq1W6x6LxTIKeBq4FL0nijQ7i8UyEvgI+AV4Fp2HIoawWCzZVqs1+Xc/n/HfFXW7R9PrBrz2h9p44Cur1VpitVo3A9s5/IdQRJqA1Wrda7Vav/3t15lALXAZOg9FmpXVanVYrdY9v/0YD6xH74kizc5isfgBTwAv/FbSeShinD9eNXDGn4+63aOJWa3WQxaL5Y/lOGDj737OBWKaLZTIGcxisVwDpAOh6DwUaXYWi+Ve4D5gPzASuBOdiyLN7TXgZcD3t5/12VTEAL81DKMsFksOsAO4F52PupLCIJ6A/Xc/2wGbQVlEzhgWi+UB4FbgCnQeihjCarW+YLVaw4AHOTyfQueiSDOyWCxXAQ6r1frV78o6D0UMYLVay6xWa6DVak0E/g18h85HNSkMsgdo9bufWwO7DMoickawWCxvARYOz6bYg85DEUNZrdbvAH90Loo0t38BQywWSwaHZ1FcBNyAzkMRQ1mt1q8BH/S+qNs9DDIV+NRisbwItOXwZefrjAwkcjqzWCx9Acv/D6/9jc5DkWZmsVgSgXKr1brXYrH0AyrRuSjSrKxWa8///7XFYrkaGAC8jc5DkWZnsViCAA+r1XrAYrGMBgrQ+6KaFEawWq2rLRbLf4FNHP6A9ner1aplVkSaTjegp8Viyf5d7RZA56FI8woGplssFjcgH7hU74kixtN5KGKYUGD2bzMM9wKXWK3W9Wf6+aglSEVERERERETEJWgmhYiIiIiIiIi4BDUpRERERERERMQlqEkhIiIiIiIiIi5BTQoRERERERERcQlqUoiIiIiIiIiIS1CTQkRERERERERcgpoUIiIiIiIiIuIS1KQQEREREREREZegJoWIiIiIiIiIuIT/A7H0dPxuBgSTAAAAAElFTkSuQmCC\n",
      "text/plain": [
       "<Figure size 1332x756 with 1 Axes>"
      ]
     },
     "metadata": {
      "needs_background": "light"
     },
     "output_type": "display_data"
    },
    {
     "name": "stdout",
     "output_type": "stream",
     "text": [
      "MSE: 0.7300056413697682\n",
      "R2 =  0.994581220336553\n",
      "MAE =  0.6762505680462665\n"
     ]
    }
   ],
   "source": [
    "model_svr = SVR(C=10,epsilon=0.15755774,gamma=0.18347133)\n",
    "model_svr.fit(feature_train,target_train)\n",
    "predict_results=model_svr.predict(feature_test)\n",
    "plt.plot(predict_results,target_test)#测试数组\n",
    "plt.plot(predict_results,predict_results)#测试数组\n",
    "plt.legend(['True','SVR'])\n",
    "fig = plt.gcf()\n",
    "fig.set_size_inches(18.5, 10.5)\n",
    "plt.title(\"SVR\")  # 标题\n",
    "plt.show()\n",
    "print(\"MSE:\",mean_squared_error(target_test,predict_results))\n",
    "print(\"R2 = \",metrics.r2_score(target_test,predict_results)) # R2\n",
    "print(\"MAE = \",mean_absolute_error(target_test,predict_results)) # R2\n"
   ]
  },
  {
   "cell_type": "code",
   "execution_count": 57,
   "id": "69cfee17",
   "metadata": {},
   "outputs": [],
   "source": [
    "m=(predict_results-target_test)/target_test"
   ]
  },
  {
   "cell_type": "markdown",
   "id": "6d10e453",
   "metadata": {},
   "source": [
    "m"
   ]
  },
  {
   "cell_type": "code",
   "execution_count": 58,
   "id": "9f49403f",
   "metadata": {},
   "outputs": [
    {
     "data": {
      "text/plain": [
       "array([ 0.0149861 , -0.0249599 , -0.00402983, ..., -0.01325352,\n",
       "        0.02964741,  0.02074112])"
      ]
     },
     "execution_count": 58,
     "metadata": {},
     "output_type": "execute_result"
    }
   ],
   "source": [
    "m"
   ]
  },
  {
   "cell_type": "code",
   "execution_count": 60,
   "id": "88e9c5b0",
   "metadata": {},
   "outputs": [],
   "source": [
    "dt=pd.DataFrame(predict_results,target_test)\n",
    "import openpyxl\n",
    "dt.to_excel('test.xlsx',sheet_name='sheet1',index=True)\n"
   ]
  },
  {
   "cell_type": "code",
   "execution_count": 53,
   "id": "306c7360",
   "metadata": {},
   "outputs": [
    {
     "ename": "NameError",
     "evalue": "name 'self' is not defined",
     "output_type": "error",
     "traceback": [
      "\u001b[1;31m---------------------------------------------------------------------------\u001b[0m",
      "\u001b[1;31mNameError\u001b[0m                                 Traceback (most recent call last)",
      "Input \u001b[1;32mIn [53]\u001b[0m, in \u001b[0;36m<cell line: 2>\u001b[1;34m()\u001b[0m\n\u001b[0;32m      1\u001b[0m popobj \u001b[38;5;241m=\u001b[39m []\n\u001b[1;32m----> 2\u001b[0m \u001b[38;5;28mself\u001b[39m\u001b[38;5;241m.\u001b[39mng_best \u001b[38;5;241m=\u001b[39m np\u001b[38;5;241m.\u001b[39mzeros((\u001b[38;5;241m1\u001b[39m, \u001b[38;5;28;43mself\u001b[39;49m\u001b[38;5;241m.\u001b[39mvar_num))[\u001b[38;5;241m0\u001b[39m]\n\u001b[0;32m      3\u001b[0m \u001b[38;5;28;01mfor\u001b[39;00m gen \u001b[38;5;129;01min\u001b[39;00m \u001b[38;5;28mrange\u001b[39m(\u001b[38;5;28mself\u001b[39m\u001b[38;5;241m.\u001b[39mNGEN):\n\u001b[0;32m      4\u001b[0m     \u001b[38;5;28mself\u001b[39m\u001b[38;5;241m.\u001b[39mupdate_operator(\u001b[38;5;28mself\u001b[39m\u001b[38;5;241m.\u001b[39mpop_size)\n",
      "\u001b[1;31mNameError\u001b[0m: name 'self' is not defined"
     ]
    }
   ],
   "source": []
  },
  {
   "cell_type": "code",
   "execution_count": null,
   "id": "379d08f6",
   "metadata": {},
   "outputs": [],
   "source": []
  }
 ],
 "metadata": {
  "kernelspec": {
   "display_name": "Python 3 (ipykernel)",
   "language": "python",
   "name": "python3"
  },
  "language_info": {
   "codemirror_mode": {
    "name": "ipython",
    "version": 3
   },
   "file_extension": ".py",
   "mimetype": "text/x-python",
   "name": "python",
   "nbconvert_exporter": "python",
   "pygments_lexer": "ipython3",
   "version": "3.8.8"
  }
 },
 "nbformat": 4,
 "nbformat_minor": 5
}
